# Supplementary material for: NSAIDs Modulate Clonal Evolution in Barrett's Esophagus
Source: PubMed Central journal article supplement (PMC3681672; doi:10.1371/journal.pgen.1003553), 2013-06-13

Individual a Year 0 Biopsy 1

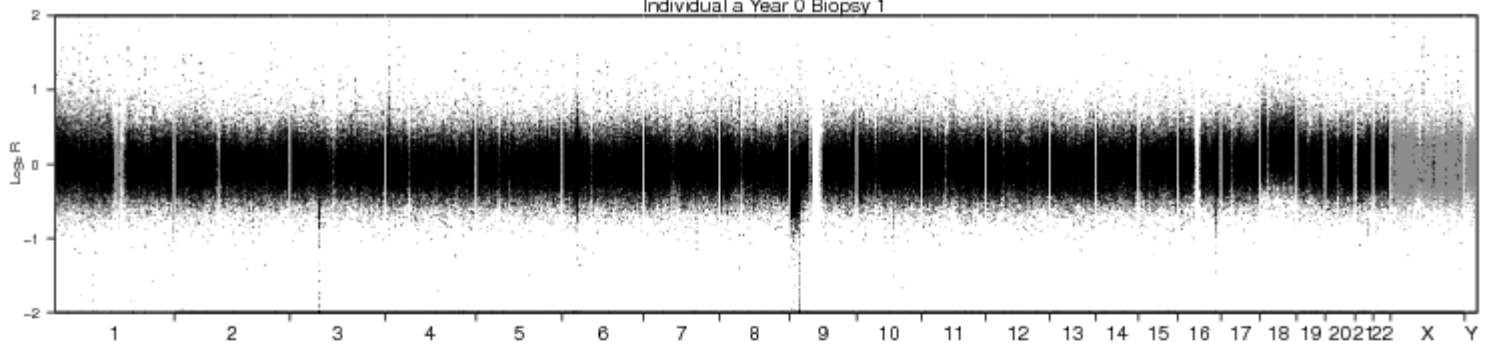

Individual a Year 0 Biopsy 1

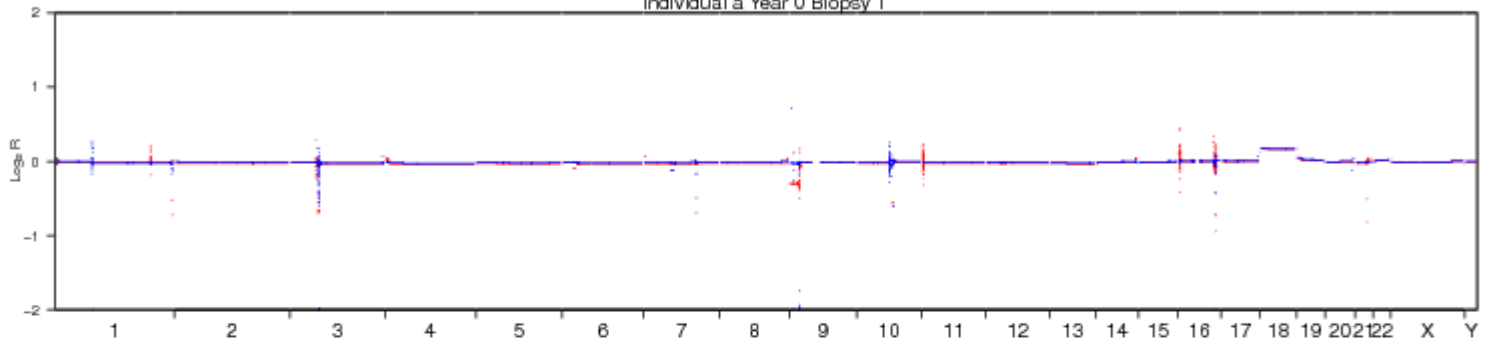

Individual a Year 0 Biopsy 1

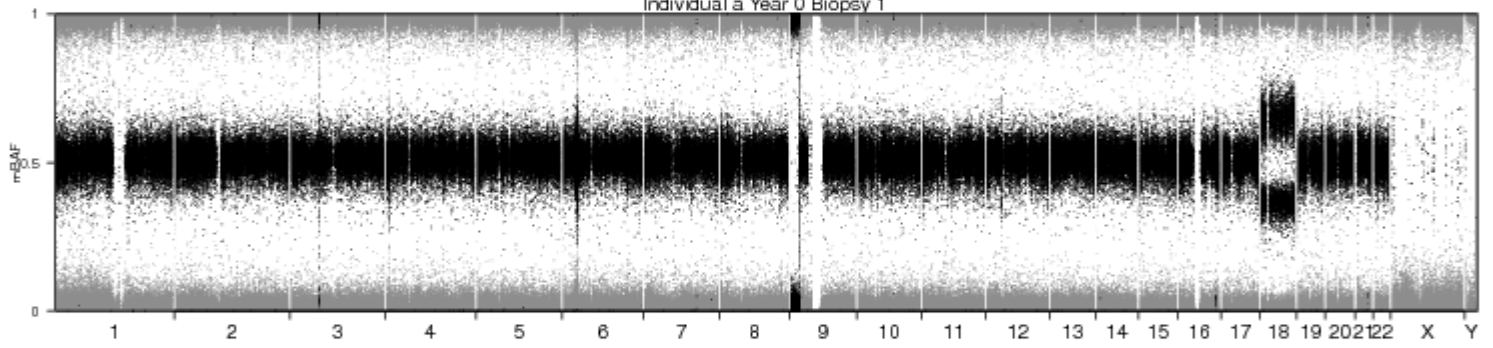

Individual a Year 0 Biopsy 1

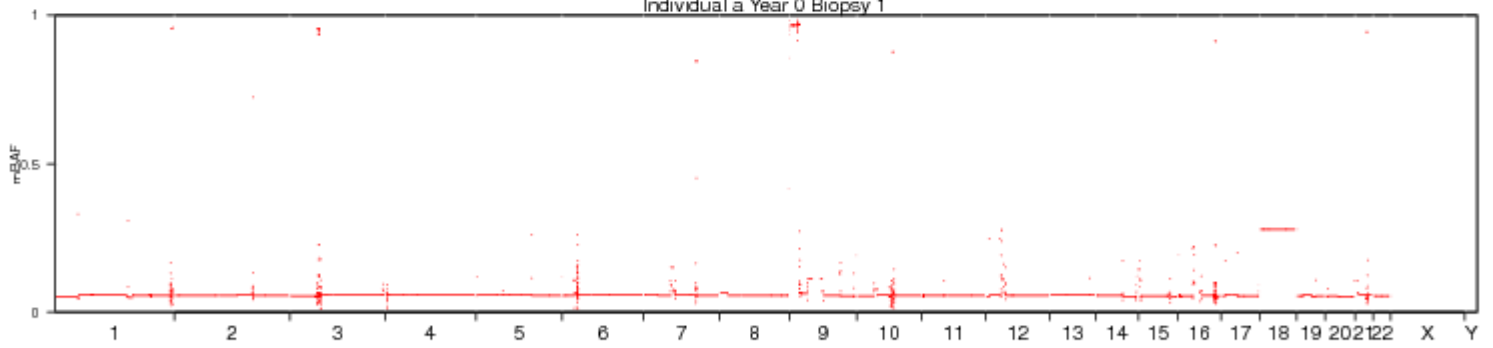

Individual a Year 0 Biopsy 1

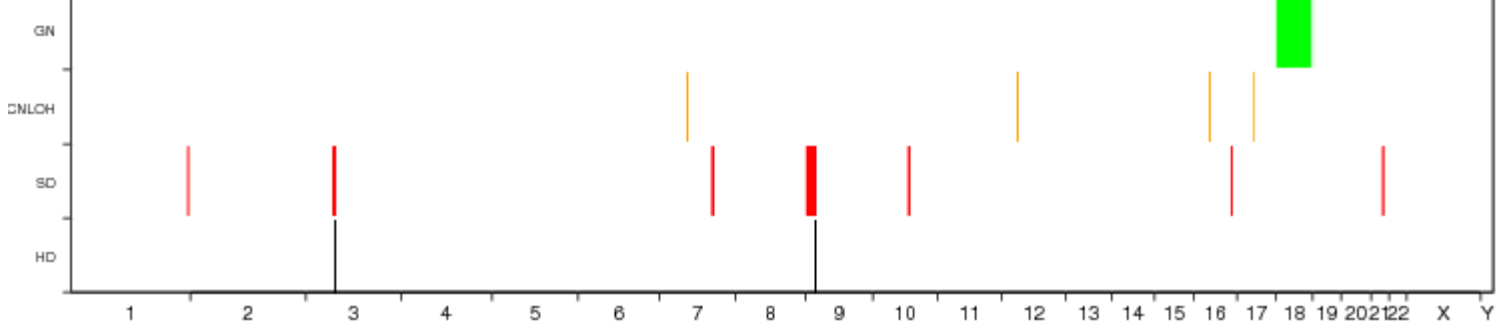

Individual a Year 0 Biopsy 2

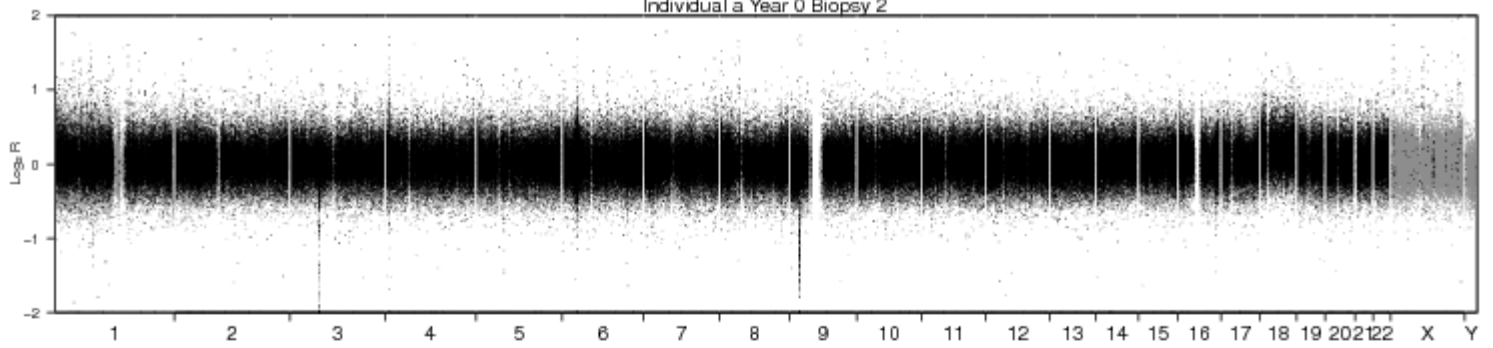

Individual a Year 0 Biopsy 2

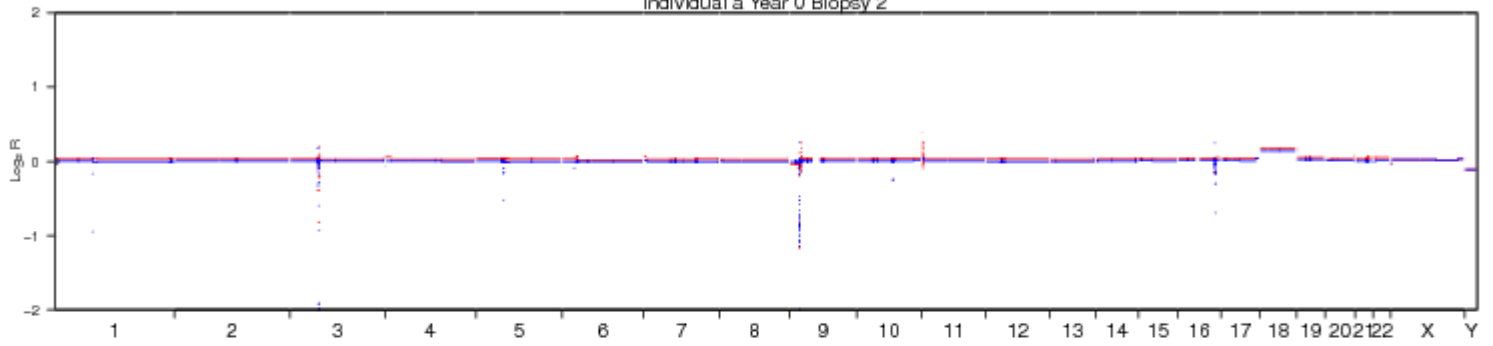

Individual a Year 0 Biopsy 2

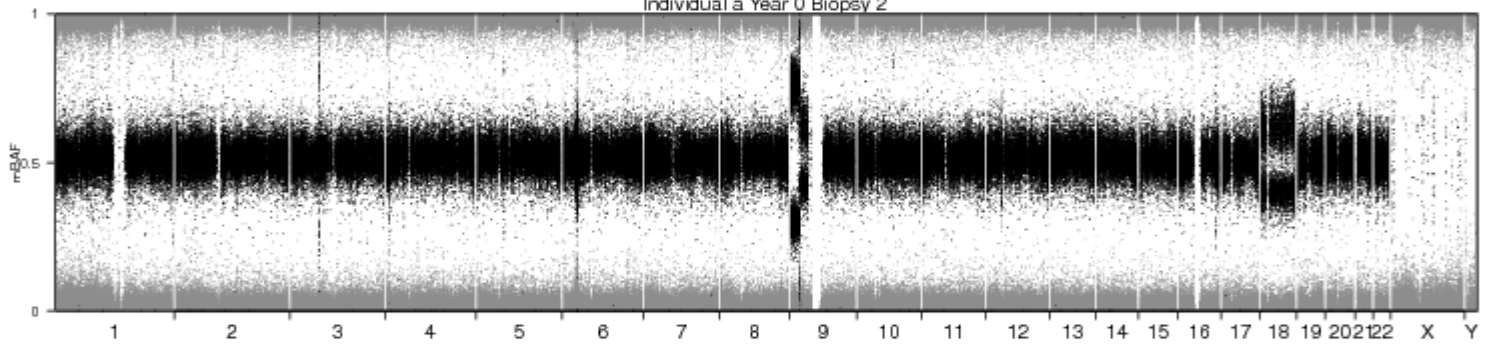

Individual a Year 0 Biopsy 2

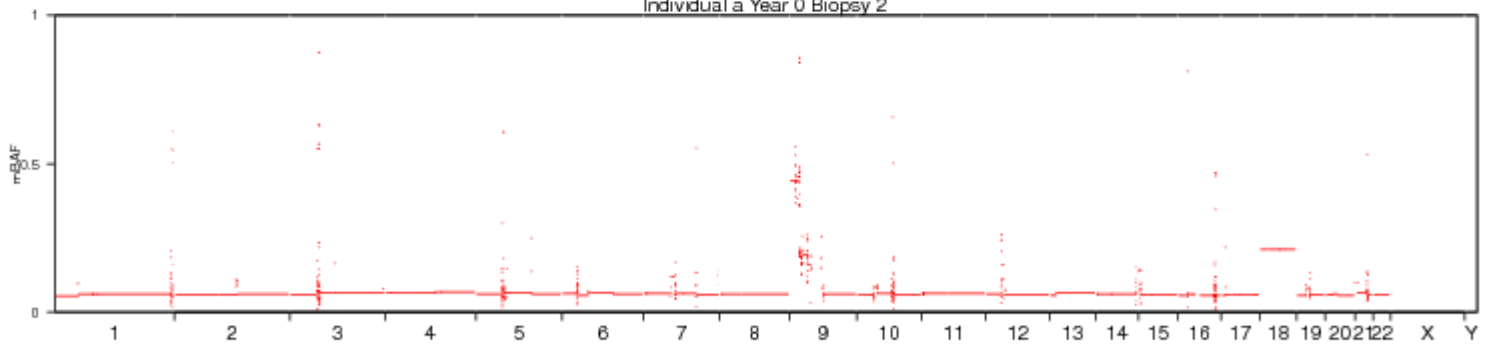

Individual a Year 0 Biopsy 2

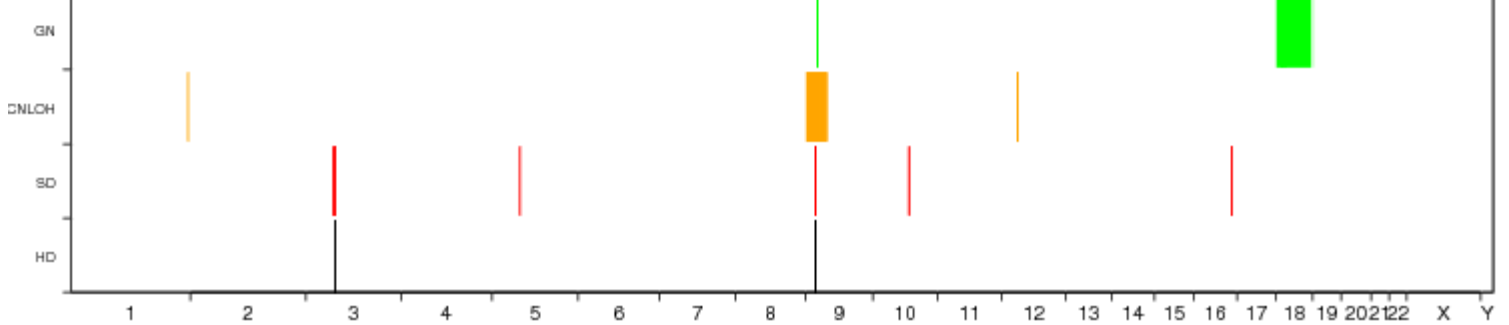

Individual a Year 7.32 Biopsy 3

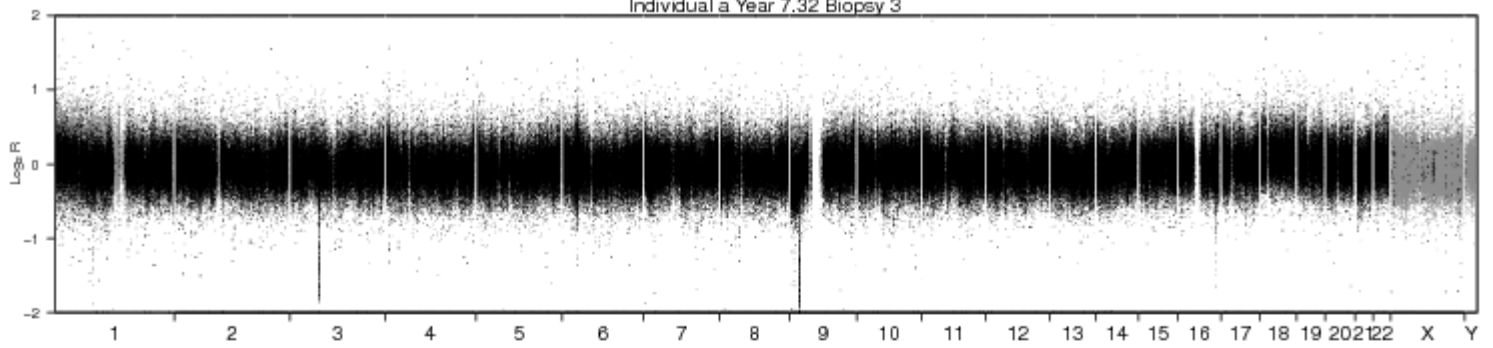

Individual a Year 7.32 Biopsy 3

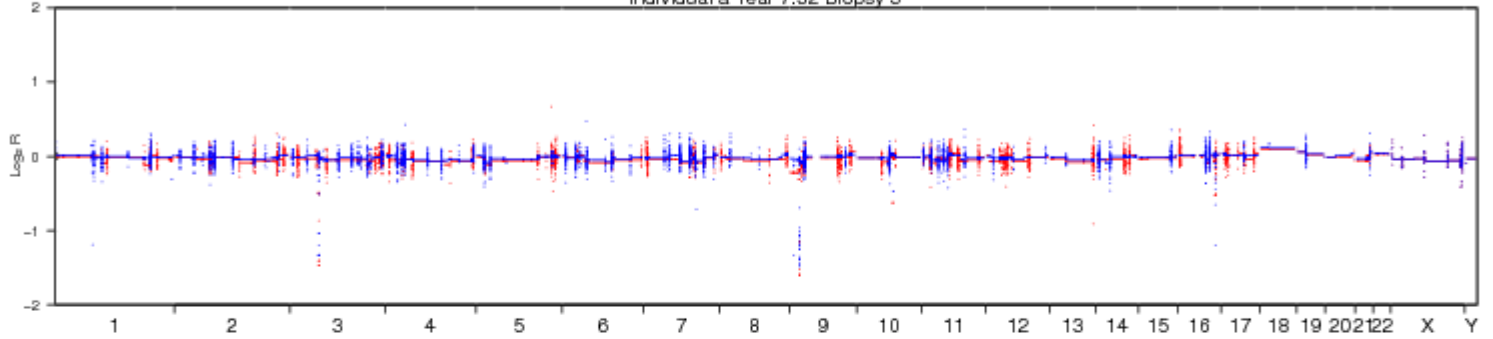

Individual a Year 7.32 Biopsy 3

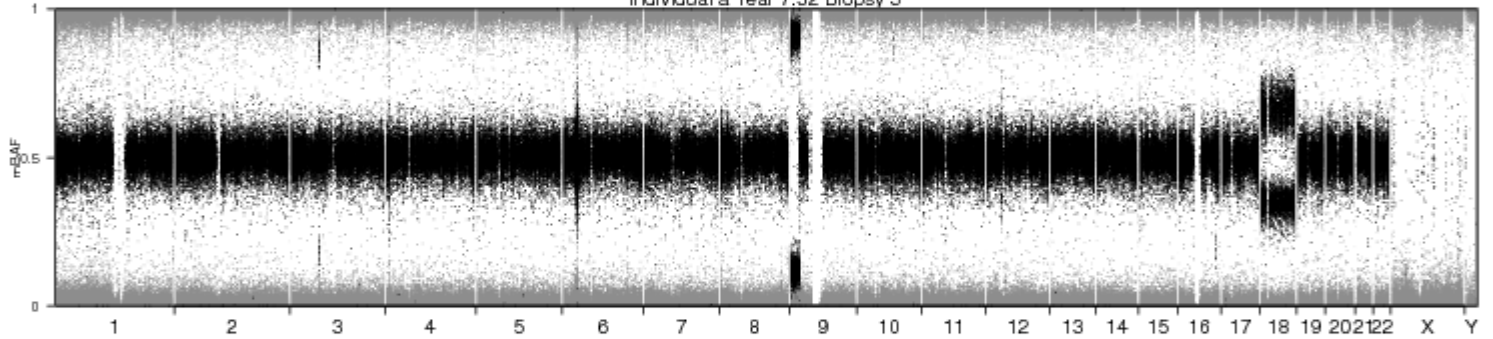

Individual a Year 7.32 Biopsy 3

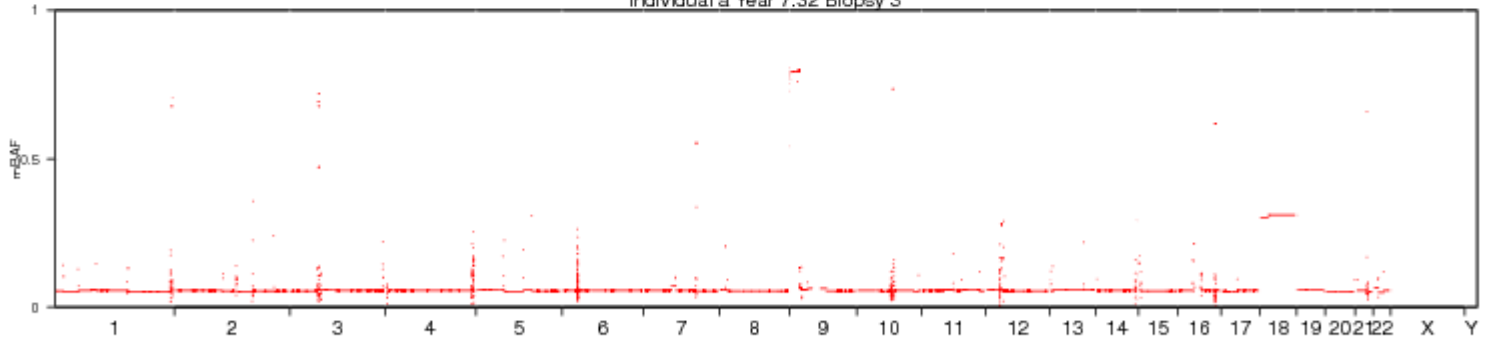

Individual a Year 7.32 Biopsy 3

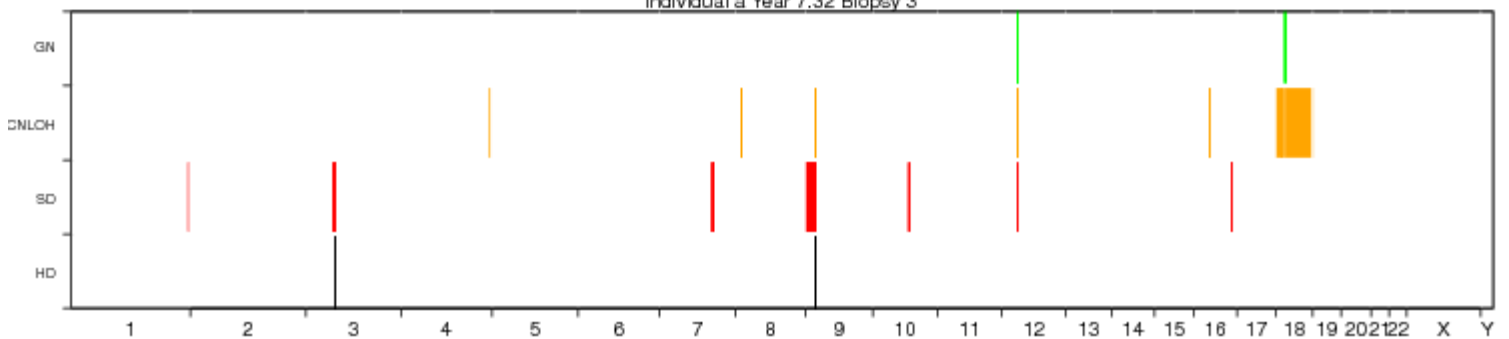

Individual a Year 7.32 Biopsy 4

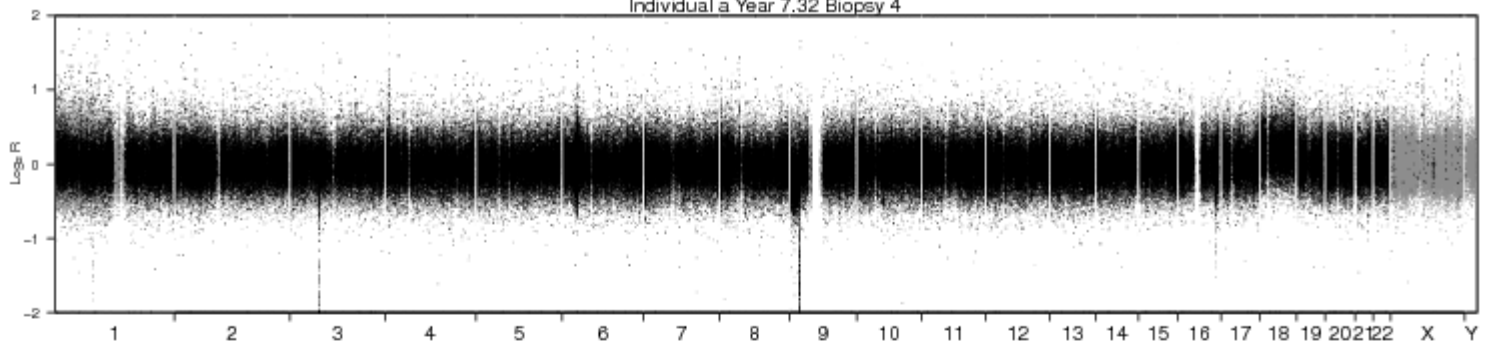

Individual a Year 7.32 Biopsy 4

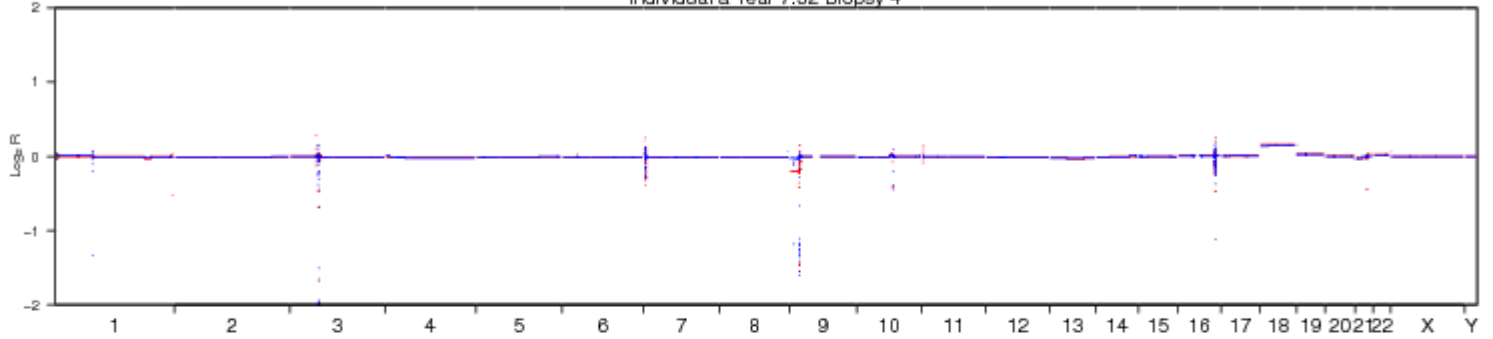

Individual a Year 7.32 Biopsy 4

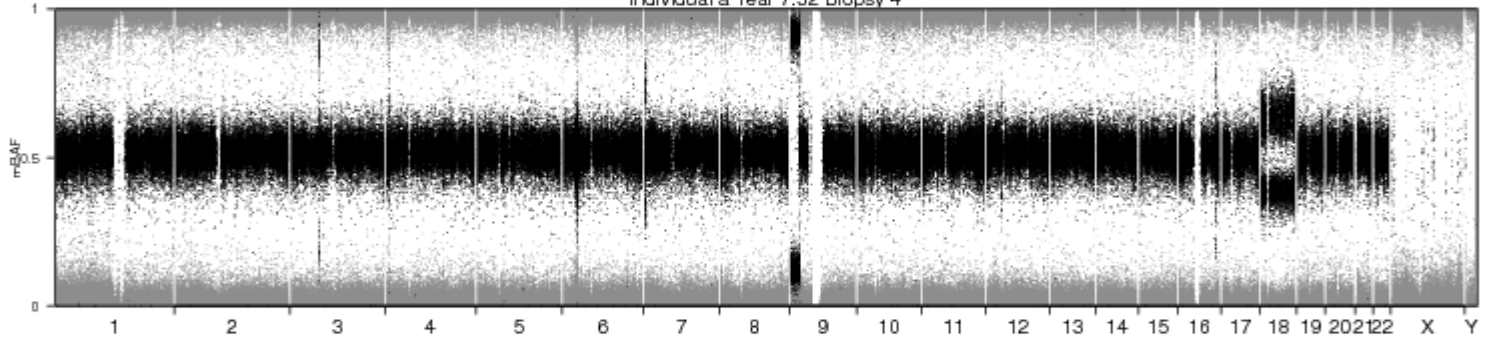

Individual a Year 7.32 Biopsy 4

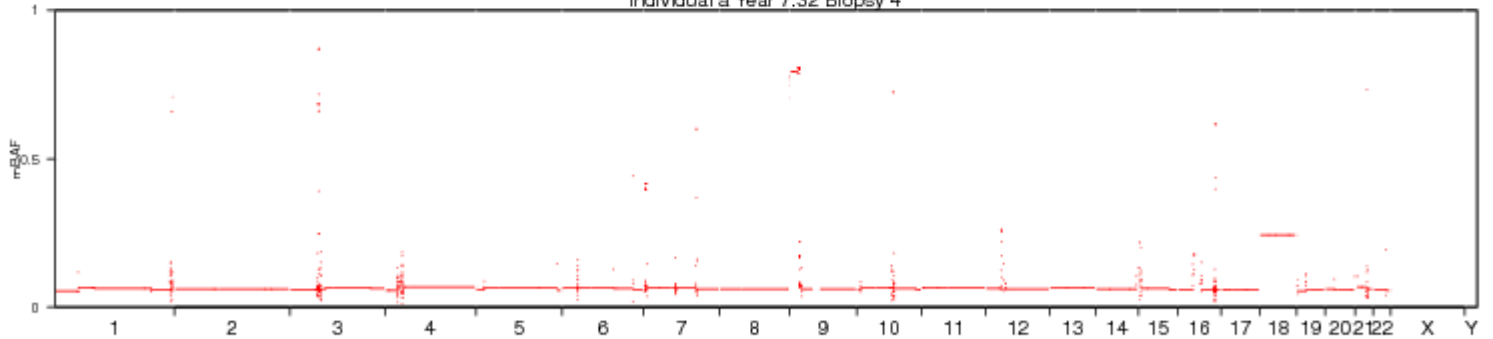

Individual a Year 7.32 Biopsy 4

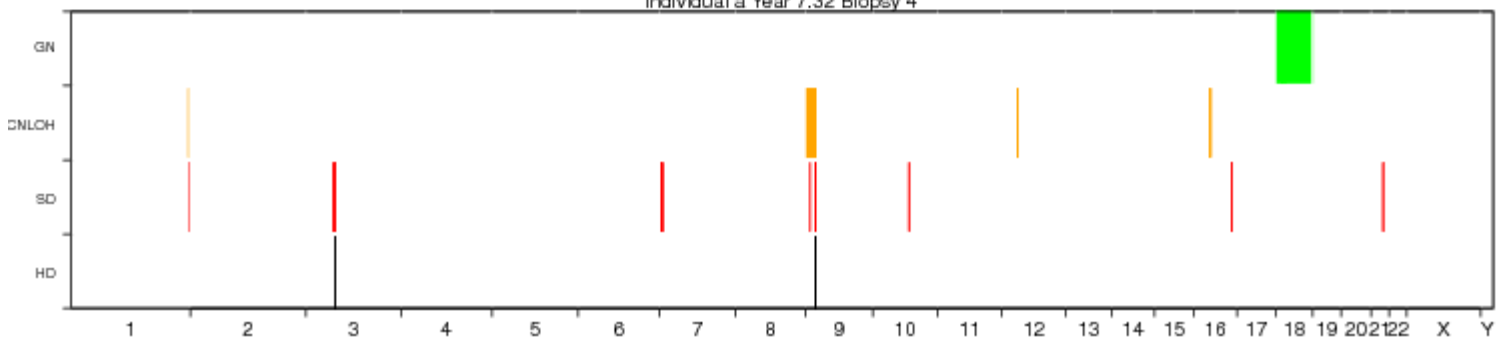



Individual a Year 12.61 Biopsy 5

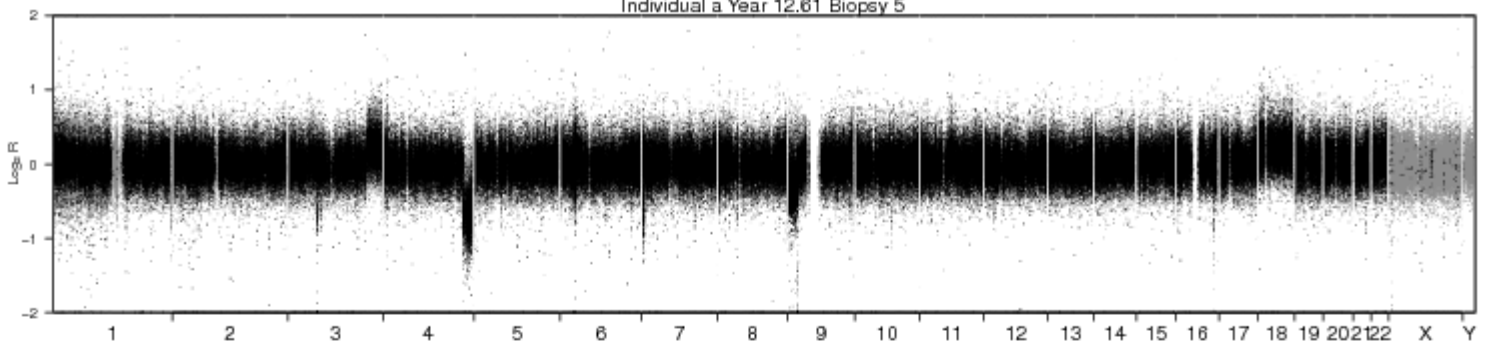

Individual a Year 12.61 Biopsy 5

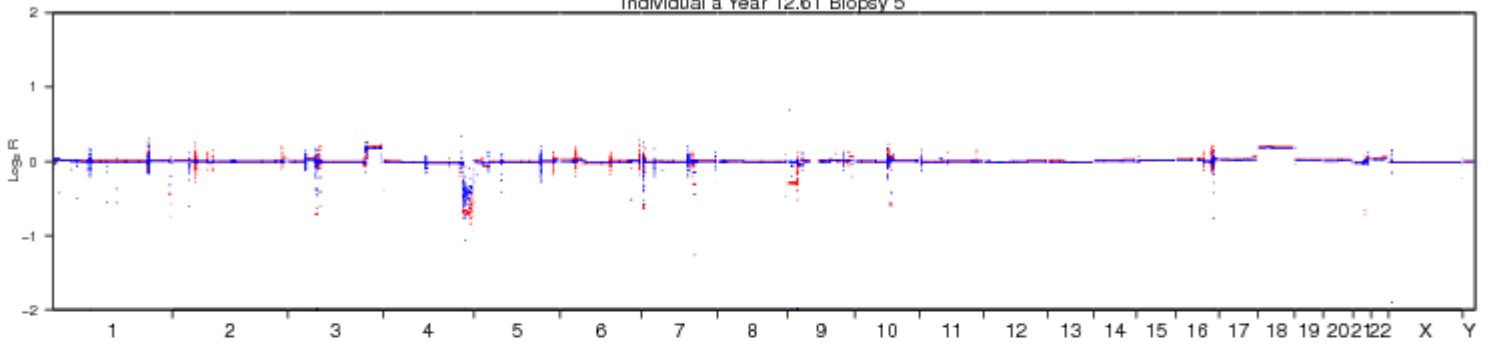

Individual a Year 12.61 Biopsy 5

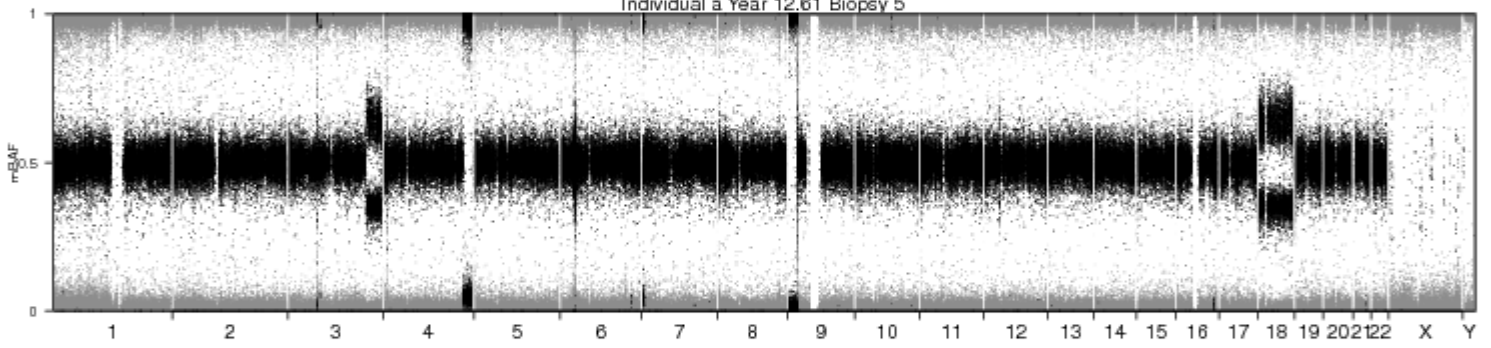

Individual a Year 12.61 Biopsy 5

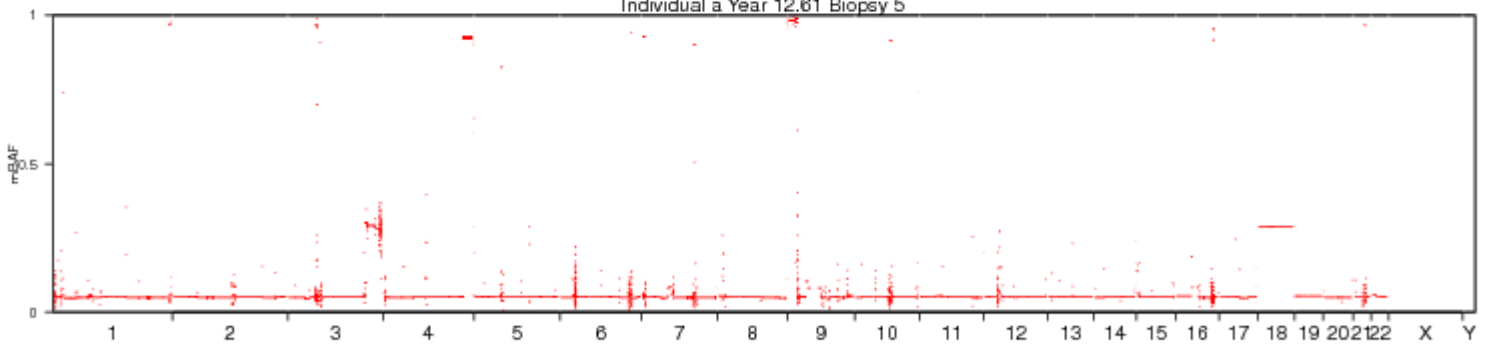

Individual a Year 12.61 Biopsy 5

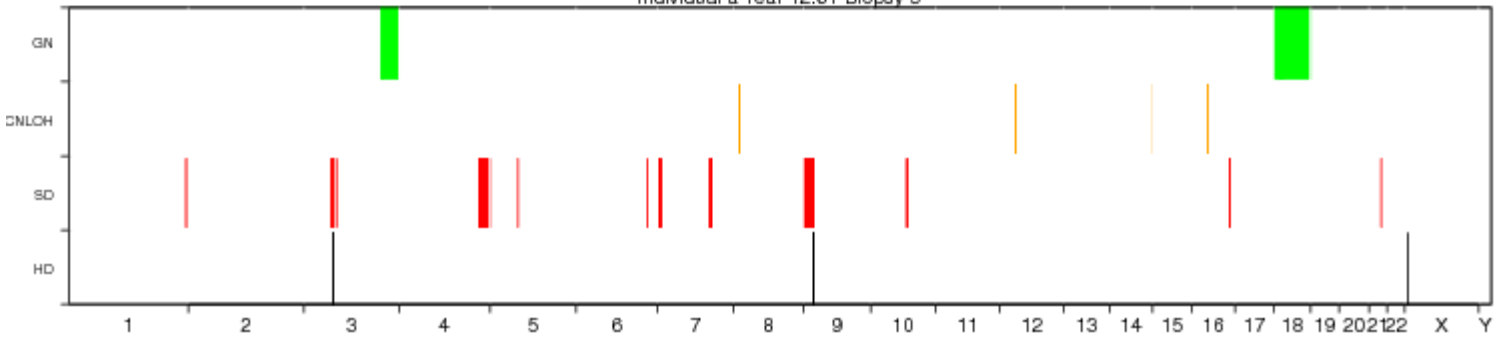

Individual a Year 12.61 Biopsy 6

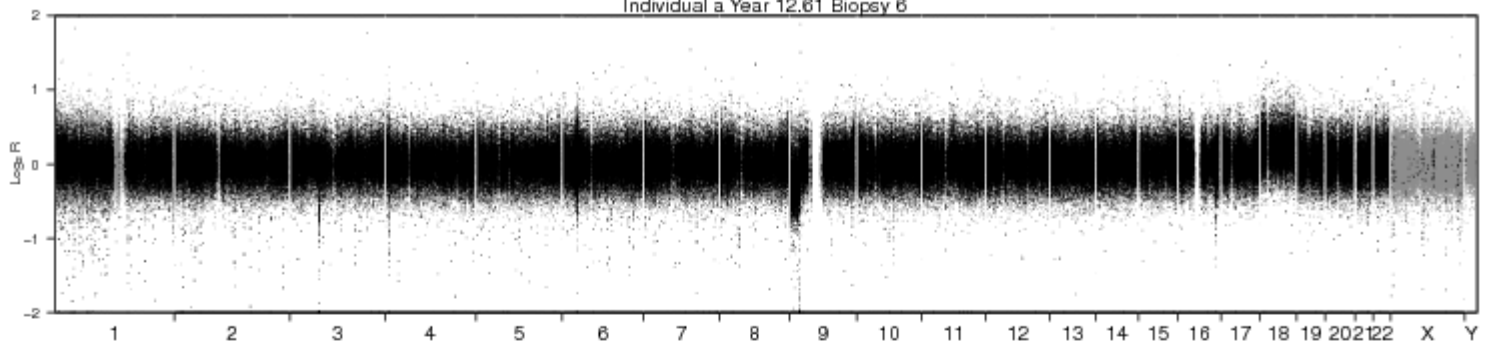

Individual a Year 12.61 Biopsy 6

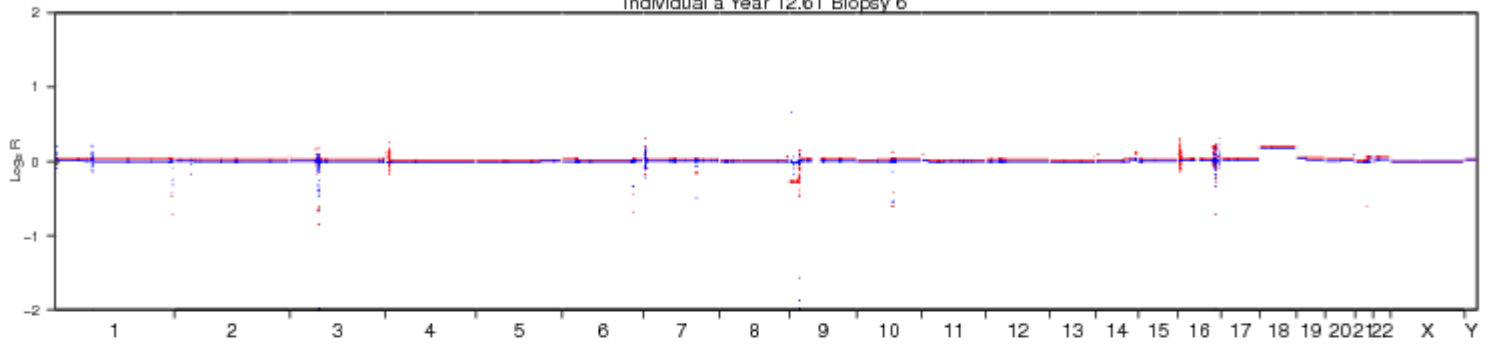

Individual a Year 12.61 Biopsy 6

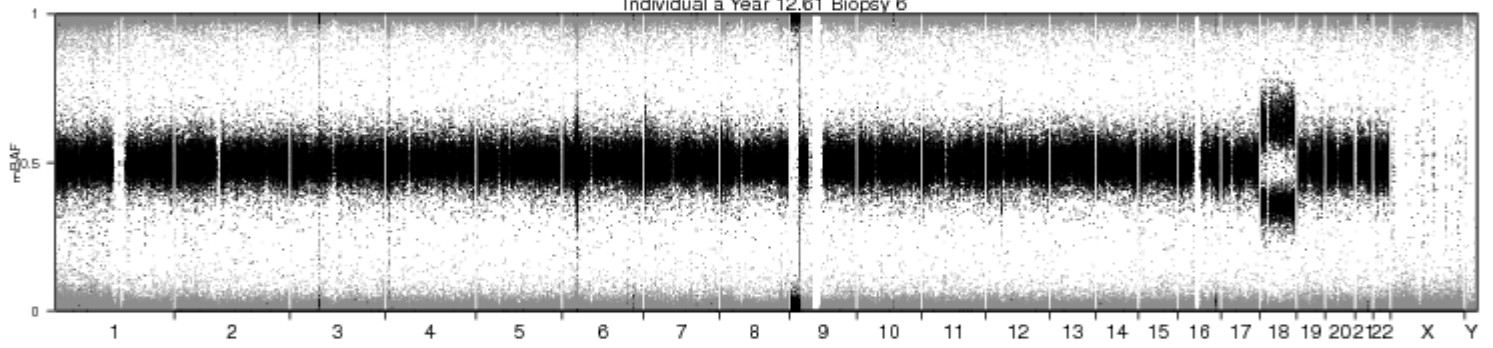

Individual a Year 12.61 Biopsy 6

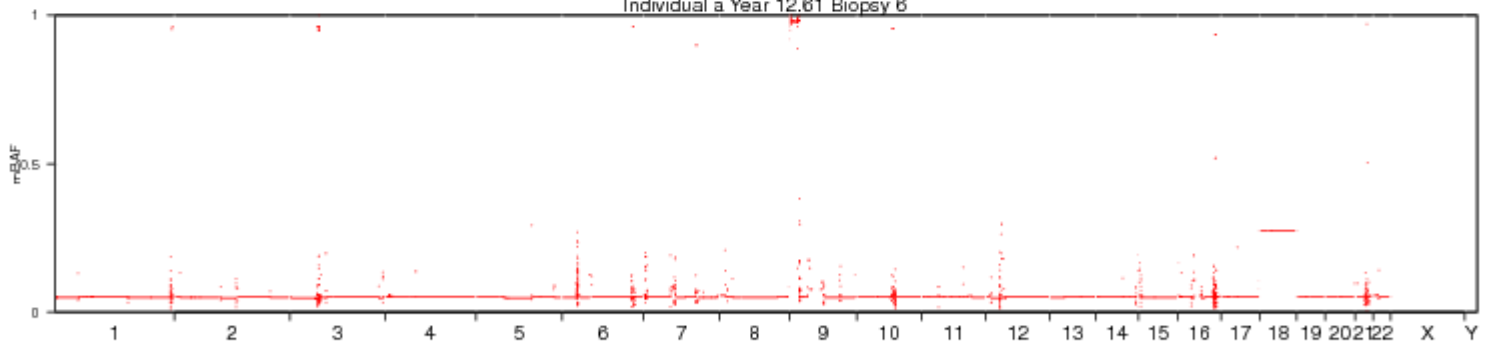

Individual a Year 12.61 Biopsy 6

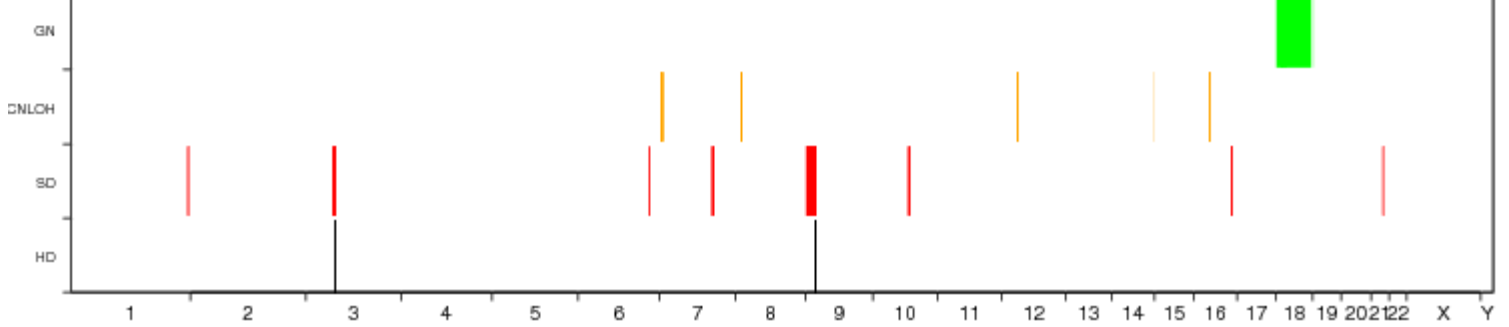

Individual a Year 14.61 Biopsy 7

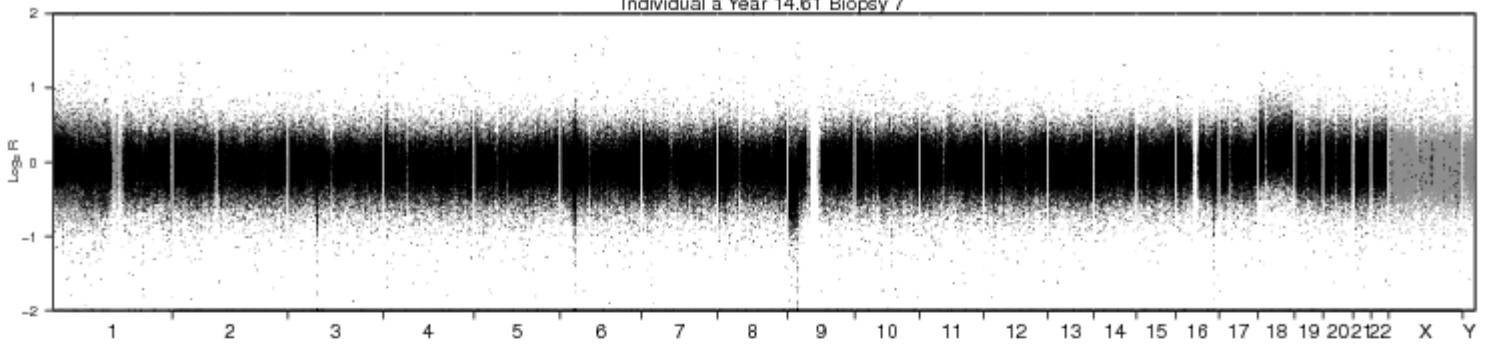

Individual a Year 14.61 Biopsy 7

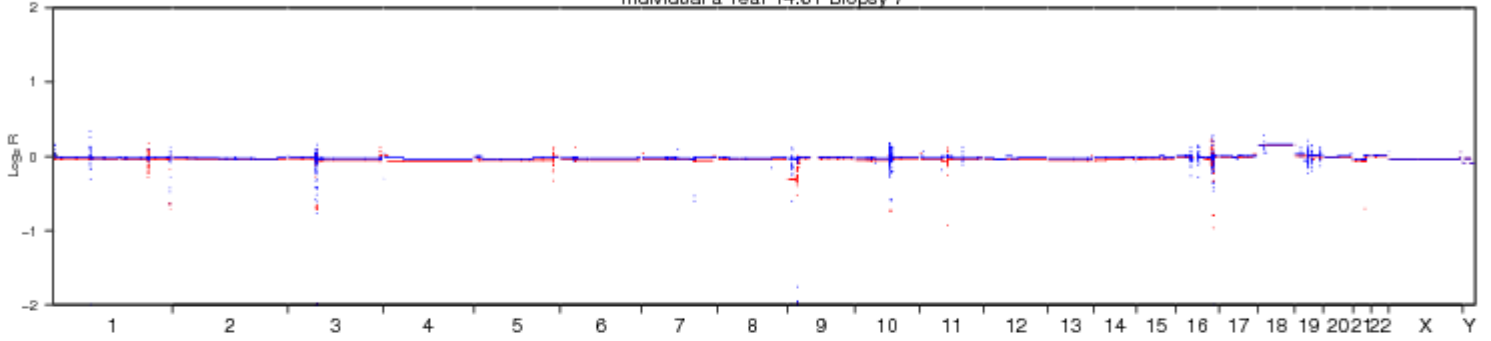

Individual a Year 14.61 Biopsy 7

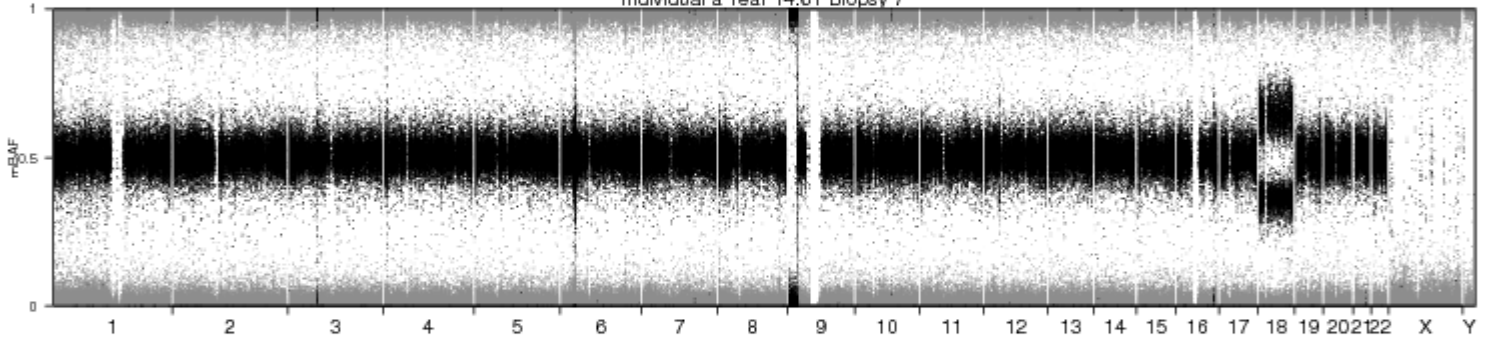

Individual a Year 14.61 Biopsy 7

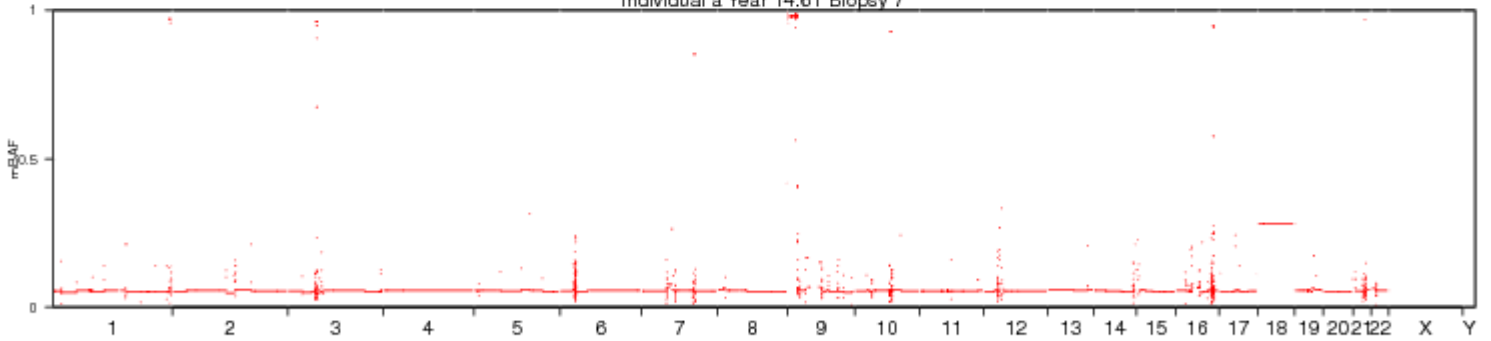

Individual a Year 14.61 Biopsy 7

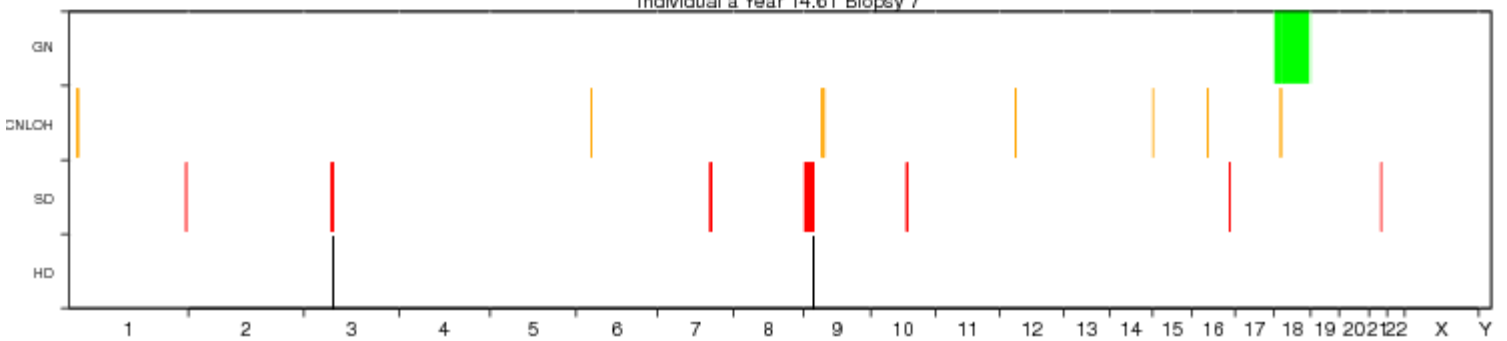

Individual a Year 14.61 Biopsy 8

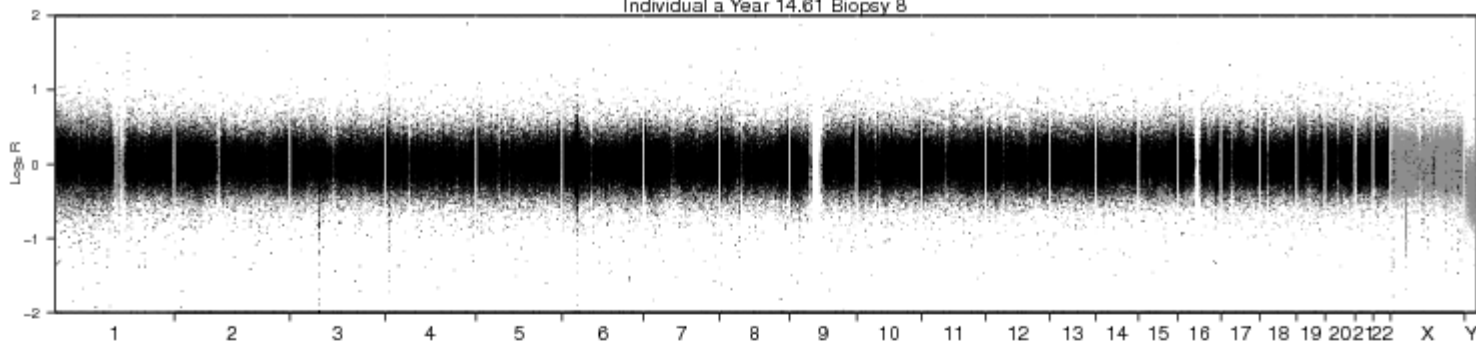

Individual a Year 14.61 Biopsy 8

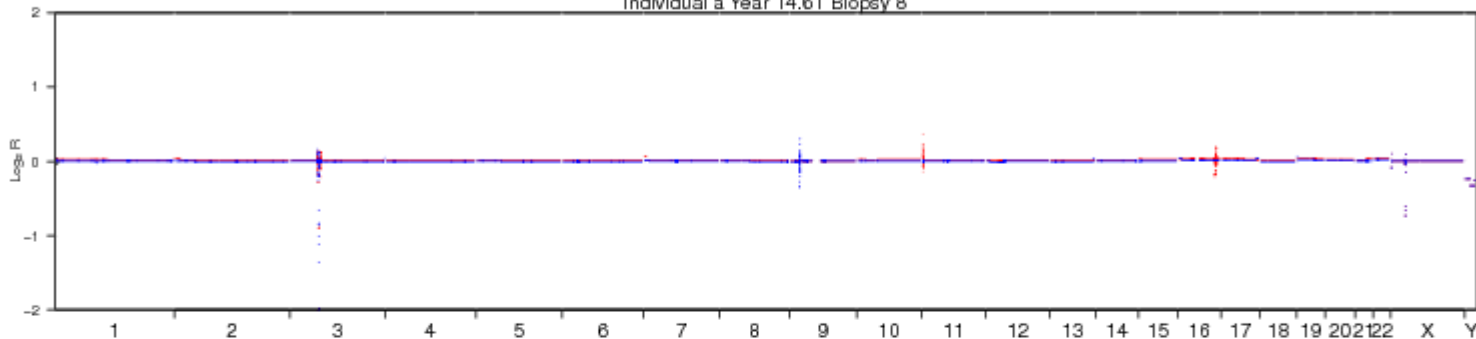

Individual a Year 14.61 Biopsy 8

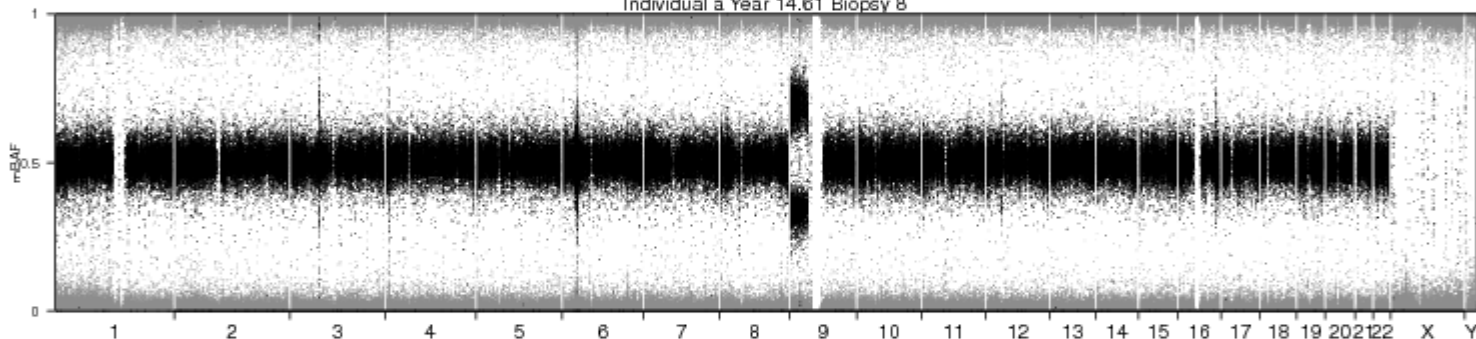

Individual a Year 14.61 Biopsy 8

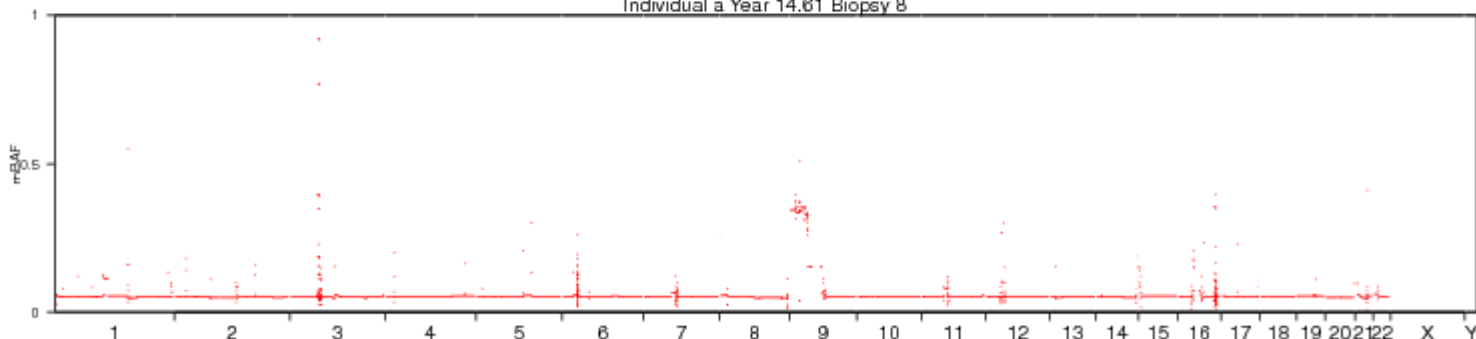

Individual a Year 14.61 Biopsy 8

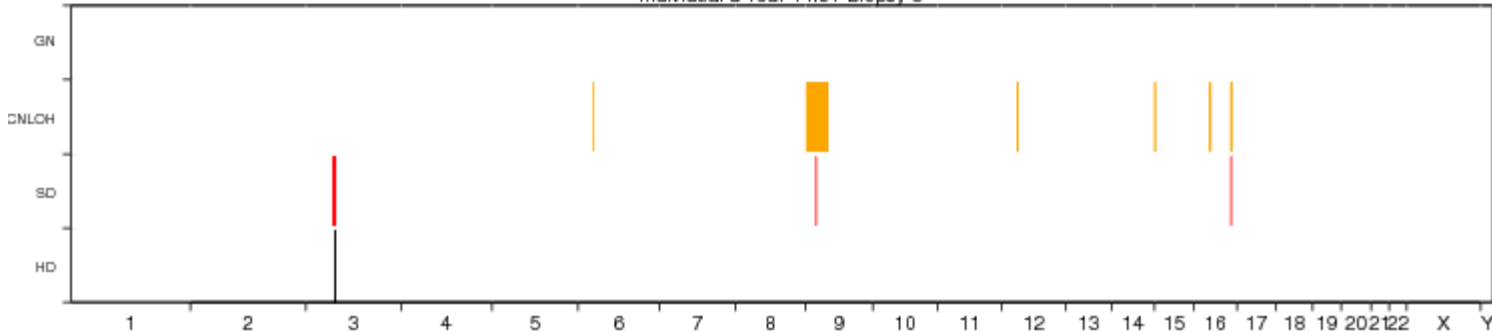



Individual a Year 16.76 Biopsy 9

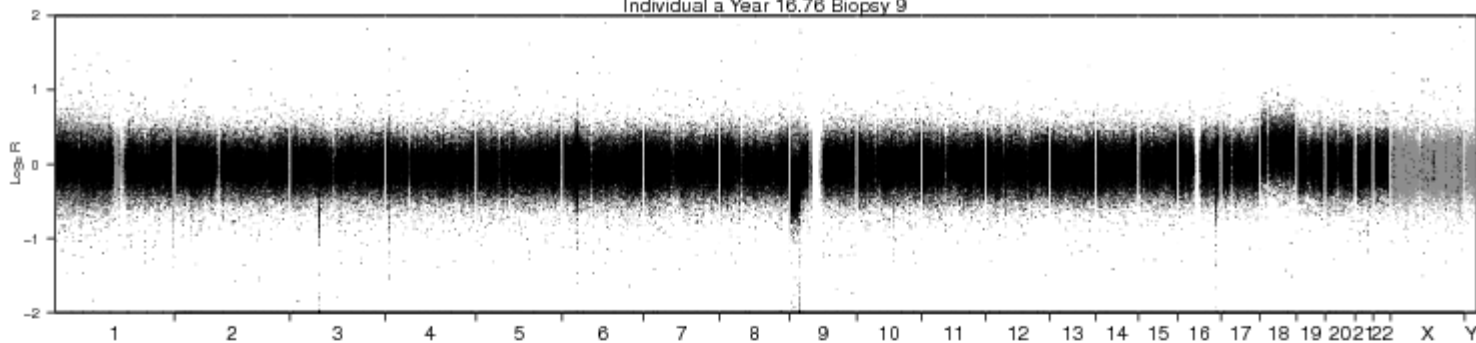

Individual a Year 16.76 Biopsy 9

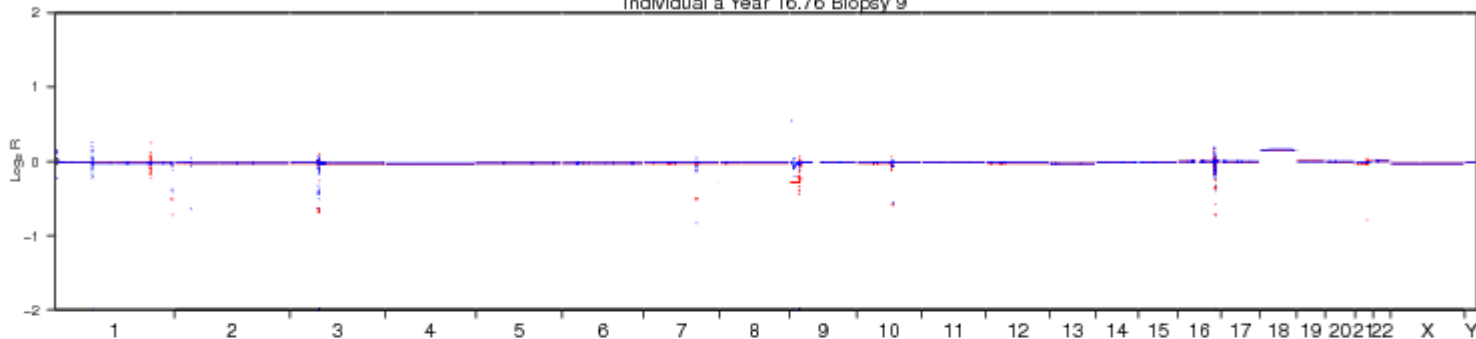

Individual a Year 16.76 Biopsy 9

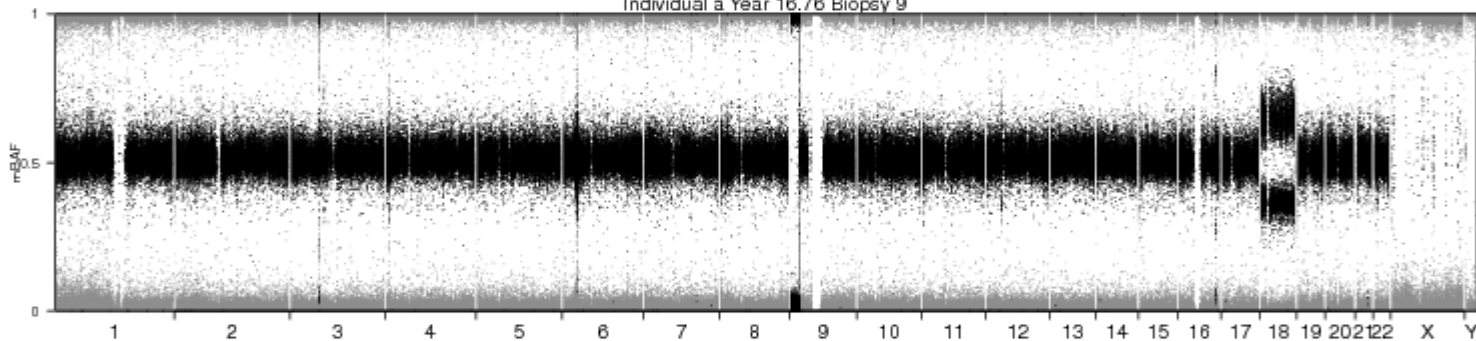

Individual a Year 16.76 Biopsy 9

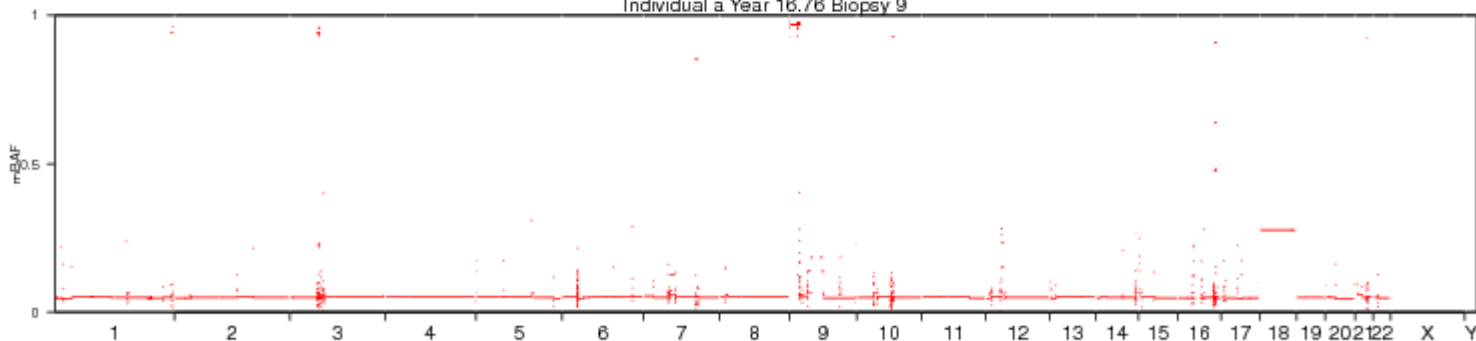

Individual a Year 16.76 Biopsy 9

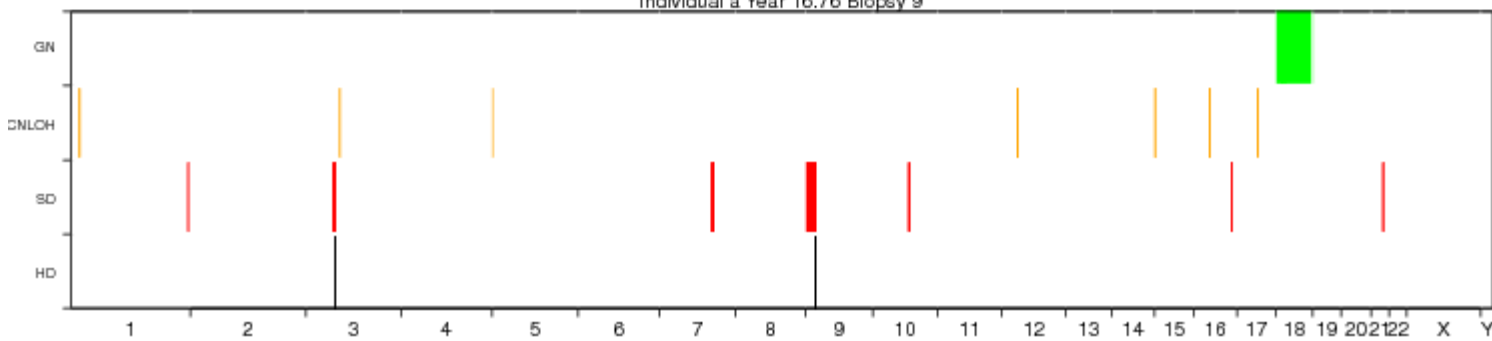

Individual a Year 16.76 Biopsy 10

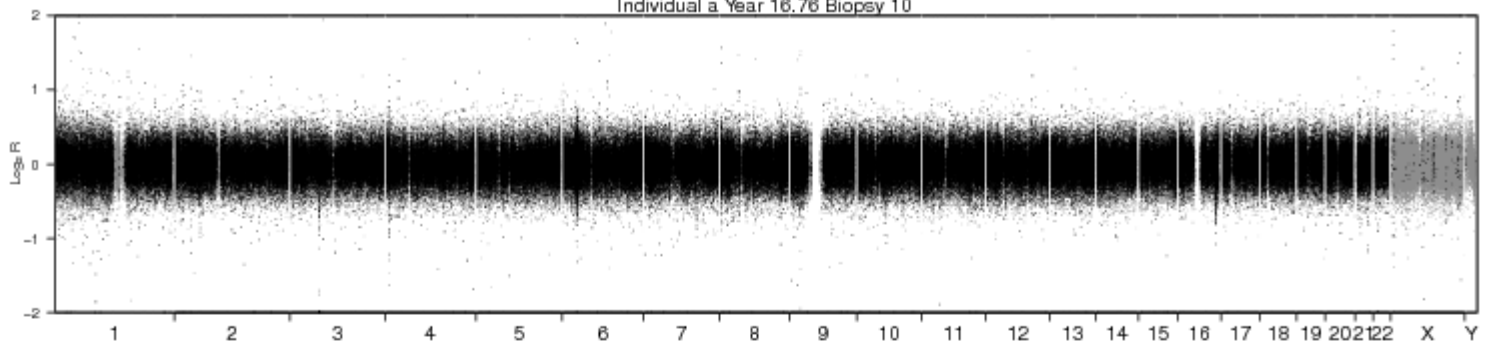

Individual a Year 16.76 Biopsy 10

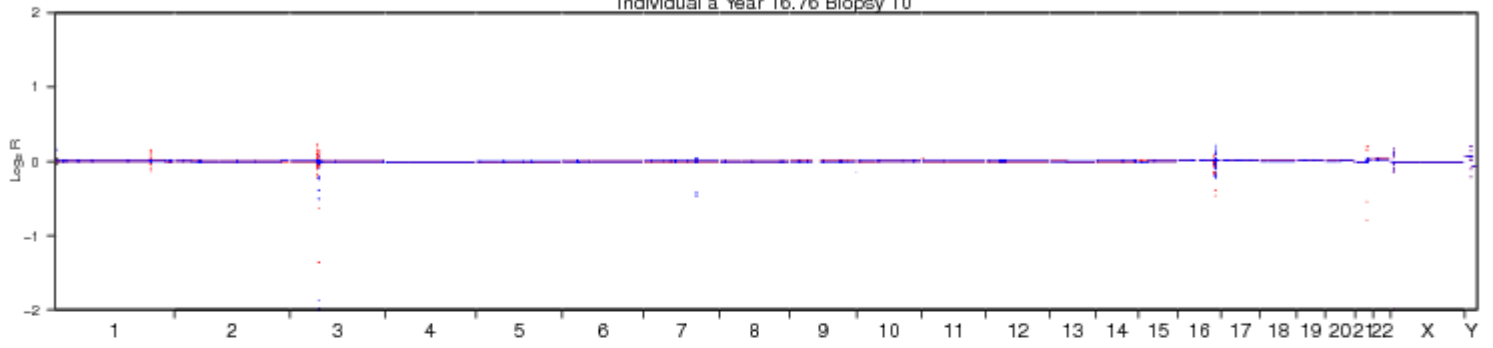

Individual a Year 16.76 Biopsy 10

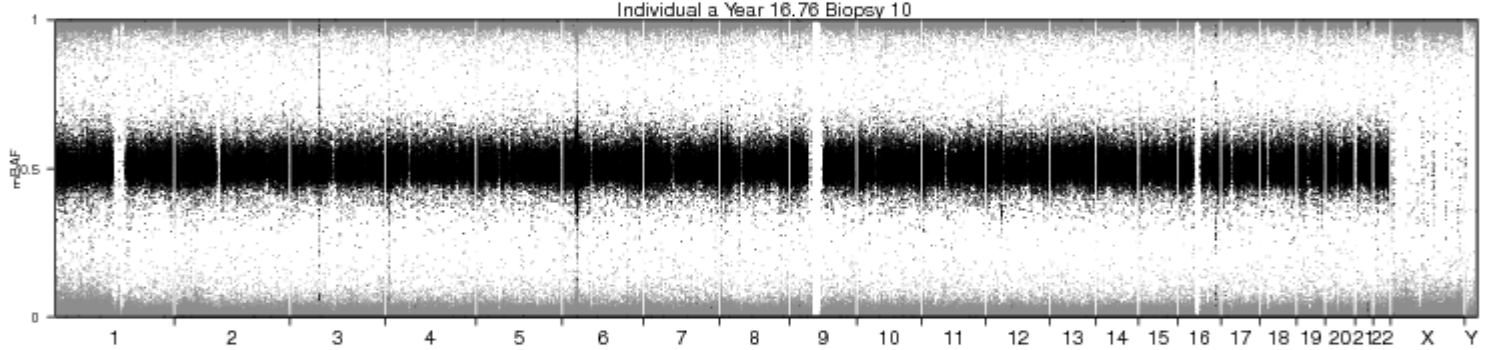

Individual a Year 16.76 Biopsy 10

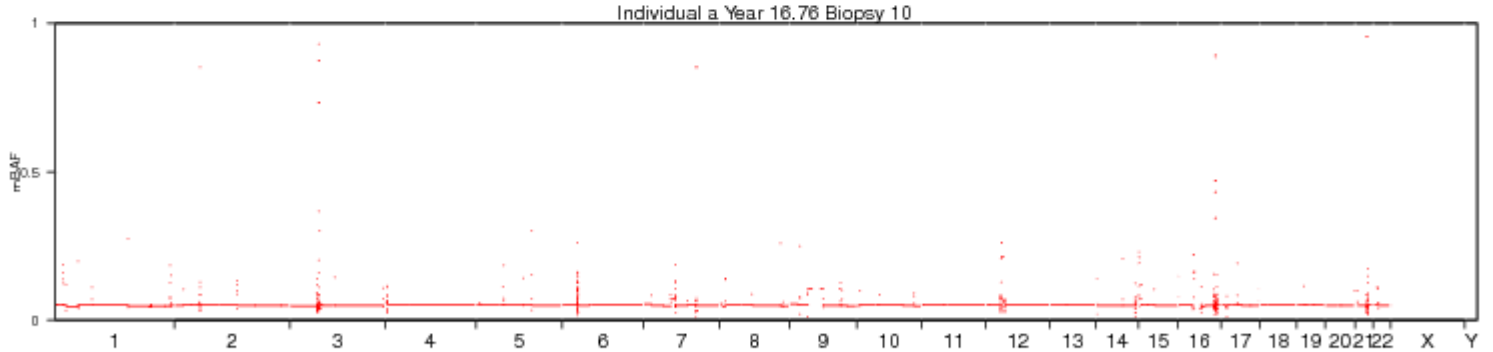

Individual a Year 16.76 Biopsy 10

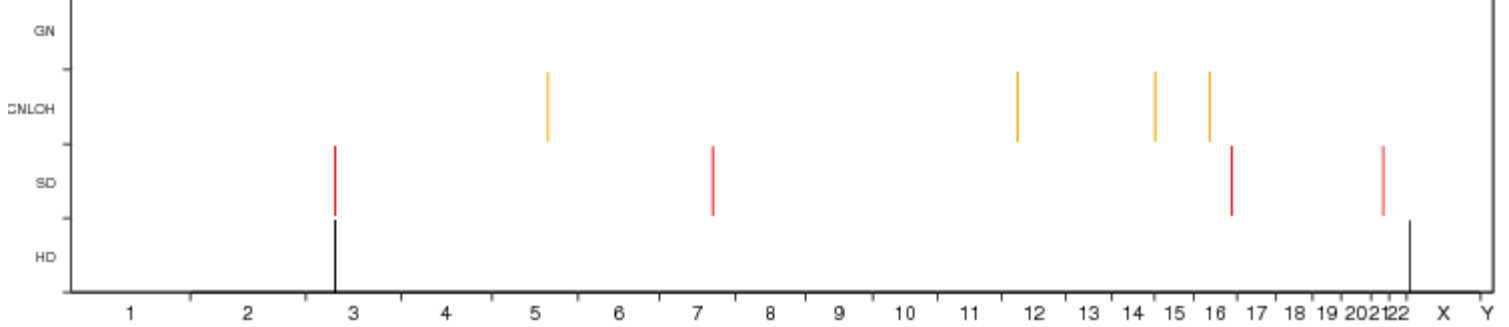

Individual a Year 19.02 Biopsy 11

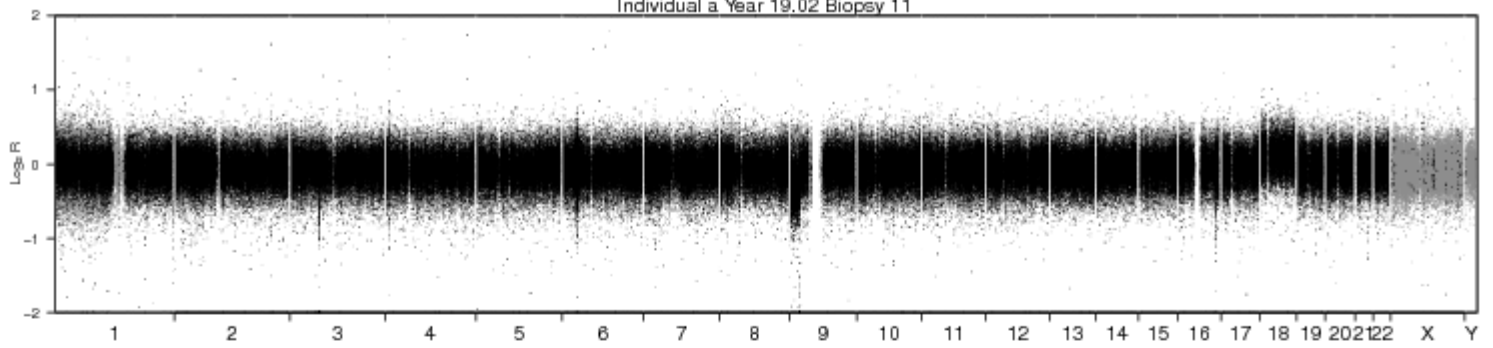

Individual a Year 19.02 Biopsy 11

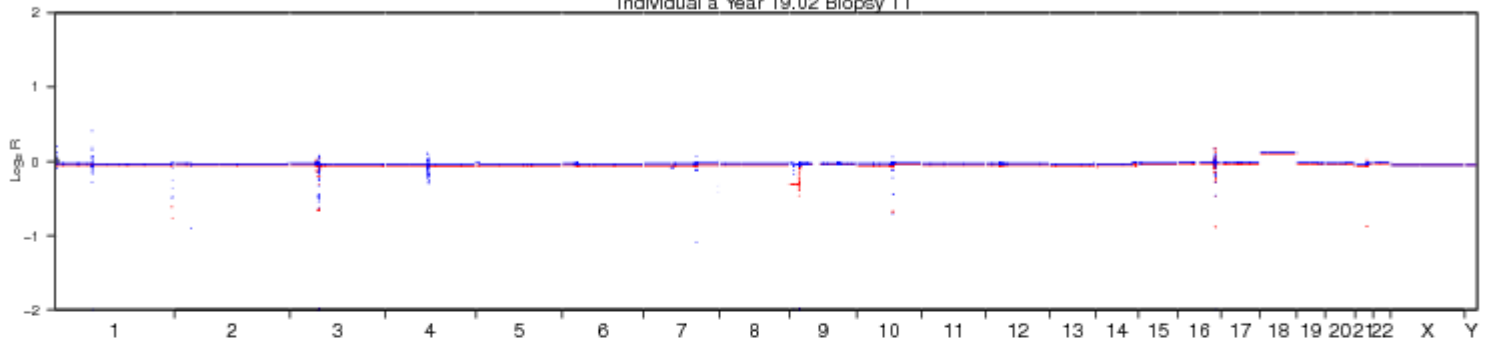

Individual a Year 19.02 Biopsy 11

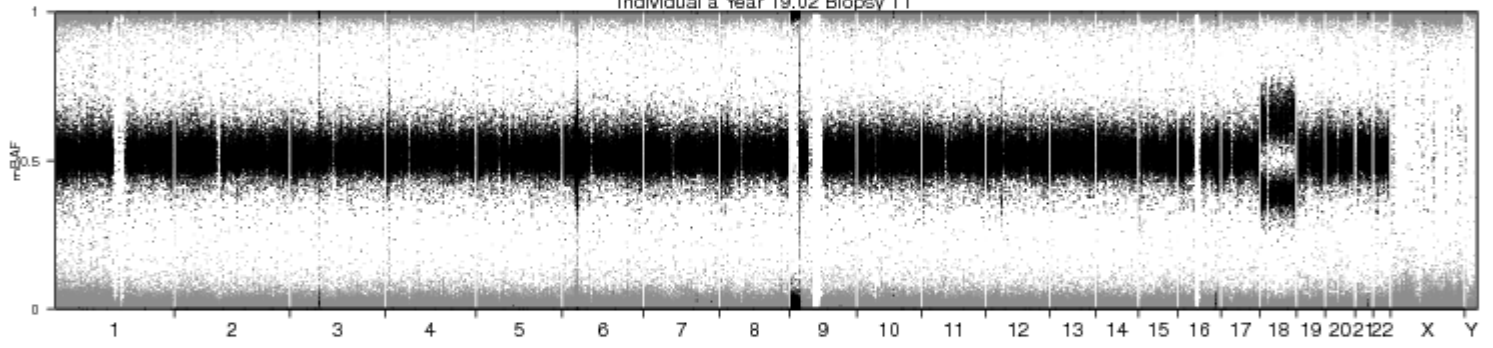

Individual a Year 19.02 Biopsy 11

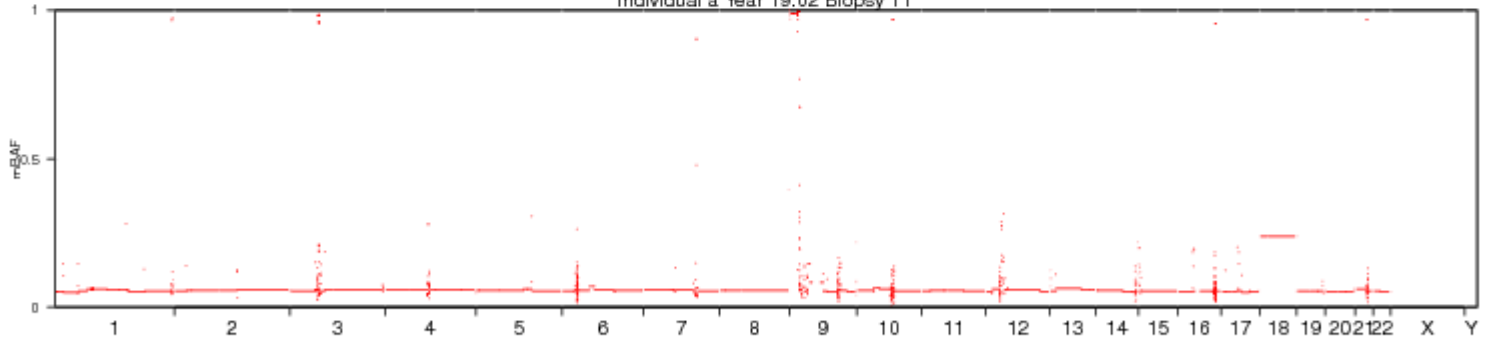

Individual a Year 19.02 Biopsy 11

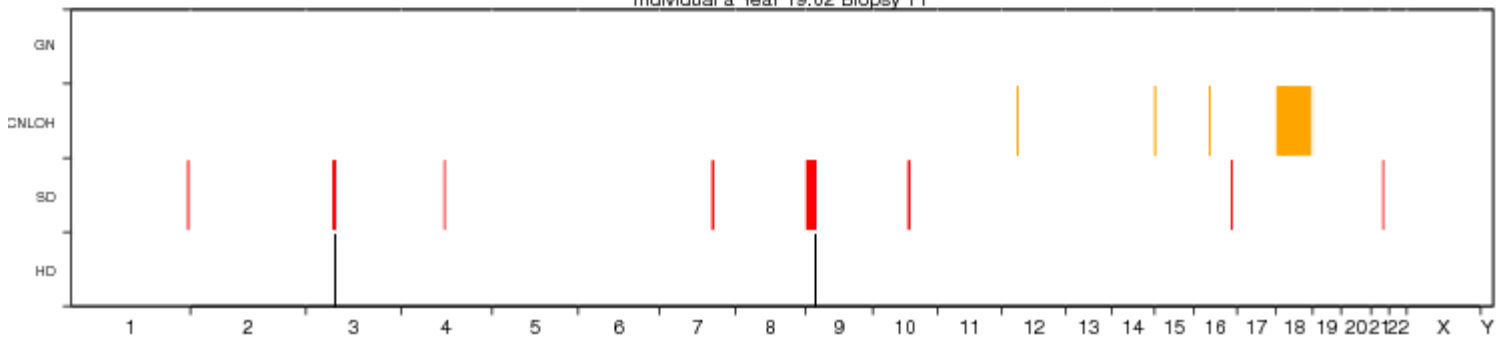

Individual a Year 19.02 Biopsy 12

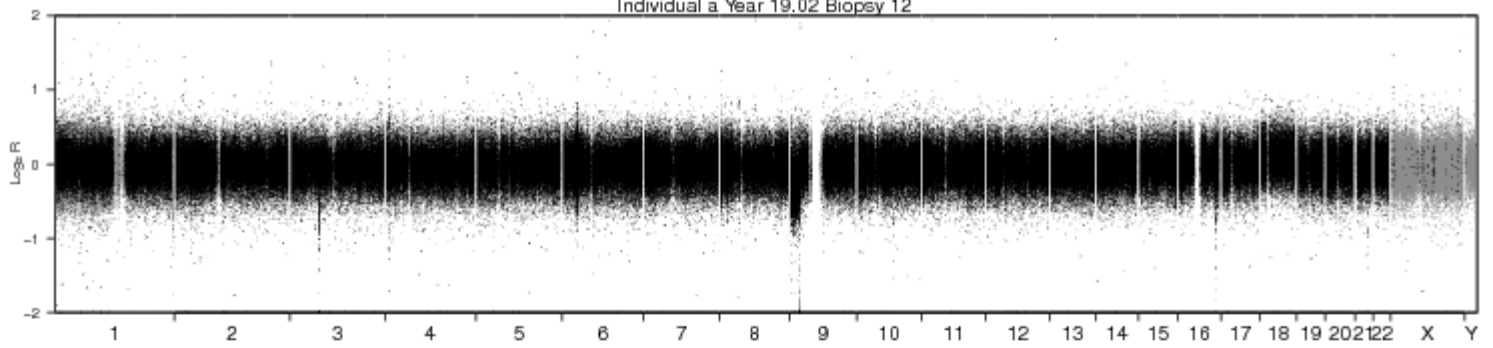

Individual a Year 19.02 Biopsy 12

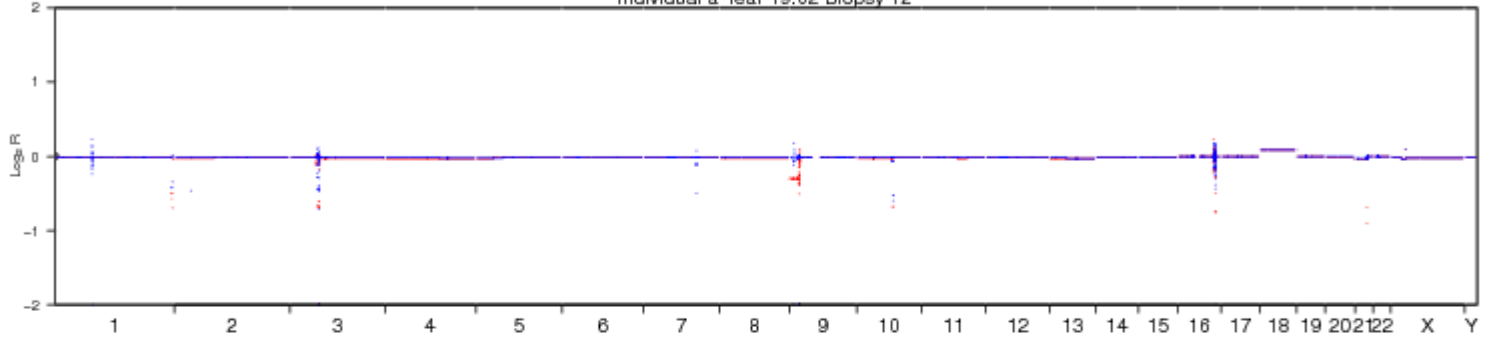

Individual a Year 19.02 Biopsy 12

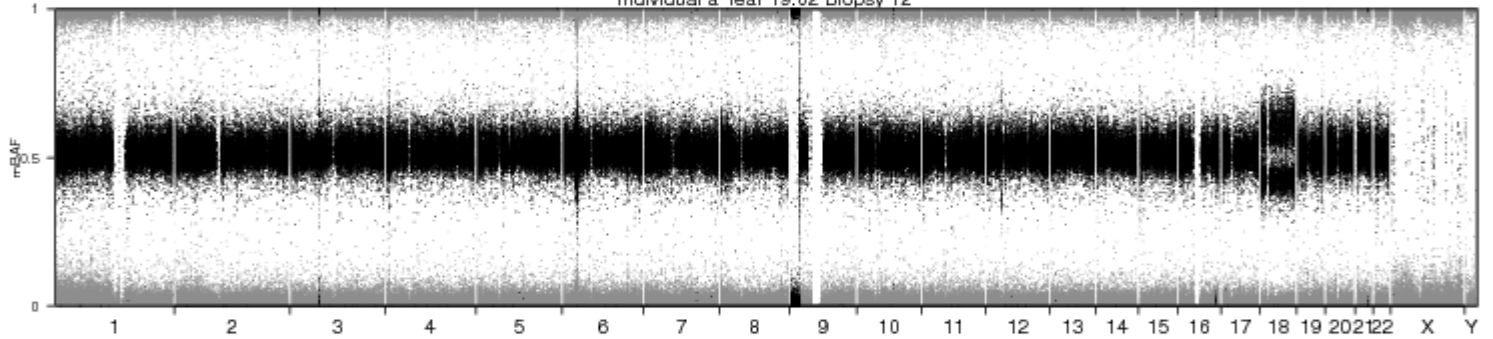

Individual a Year 19.02 Biopsy 12

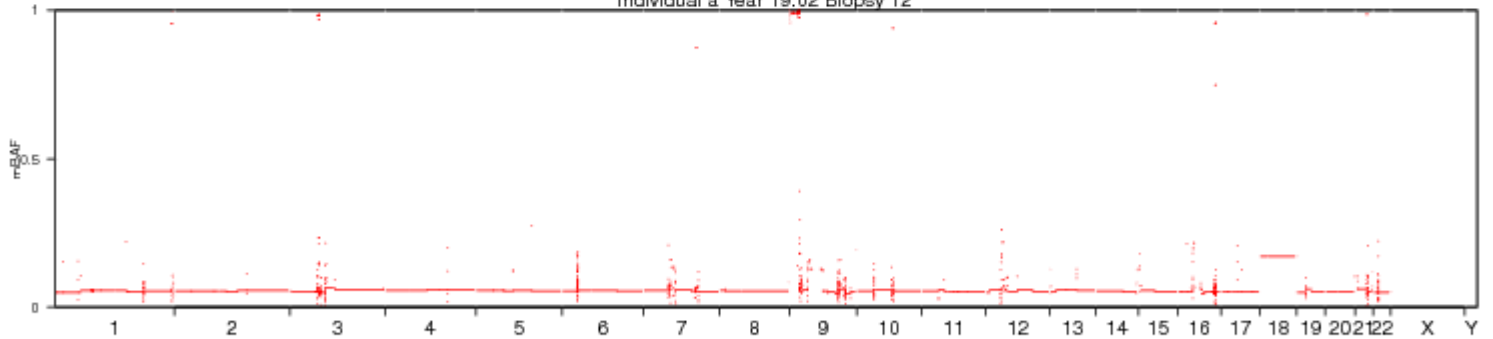

Individual a Year 19.02 Biopsy 12

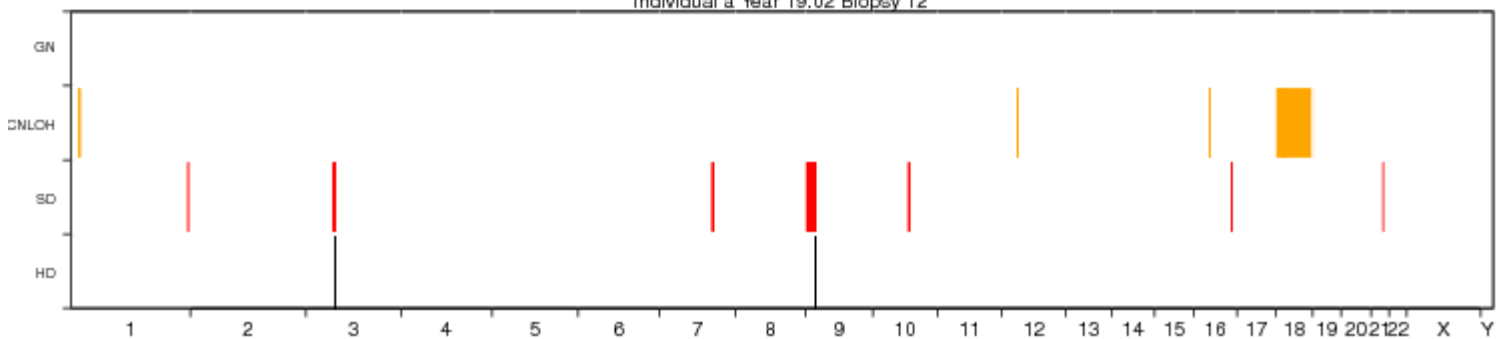



Individual b Year 0 Biopsy 1

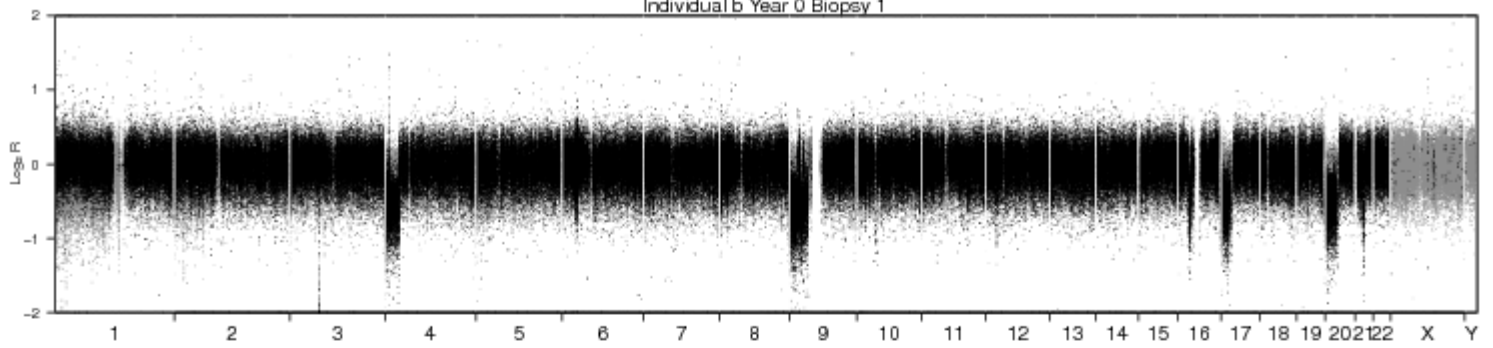

Individual b Year 0 Biopsy 1

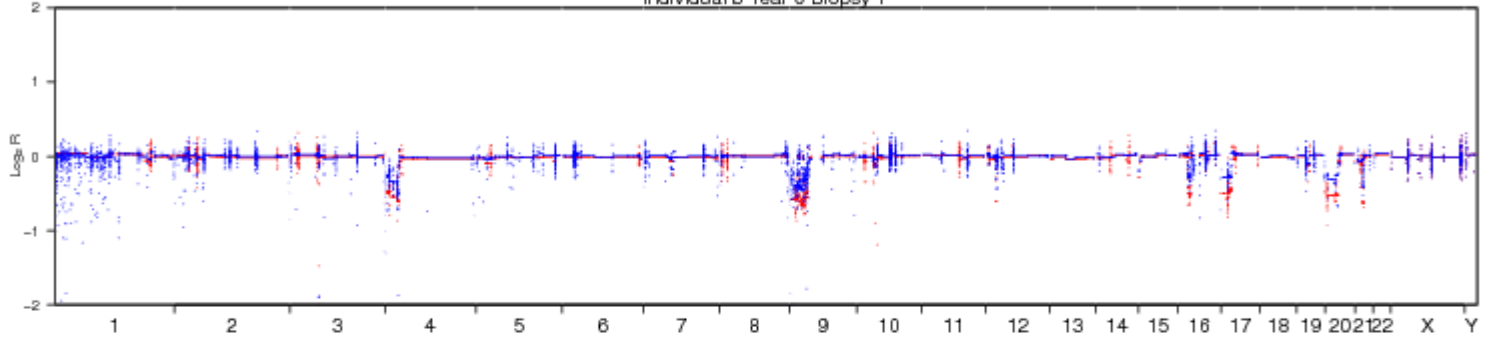

Individual b Year 0 Biopsy 1

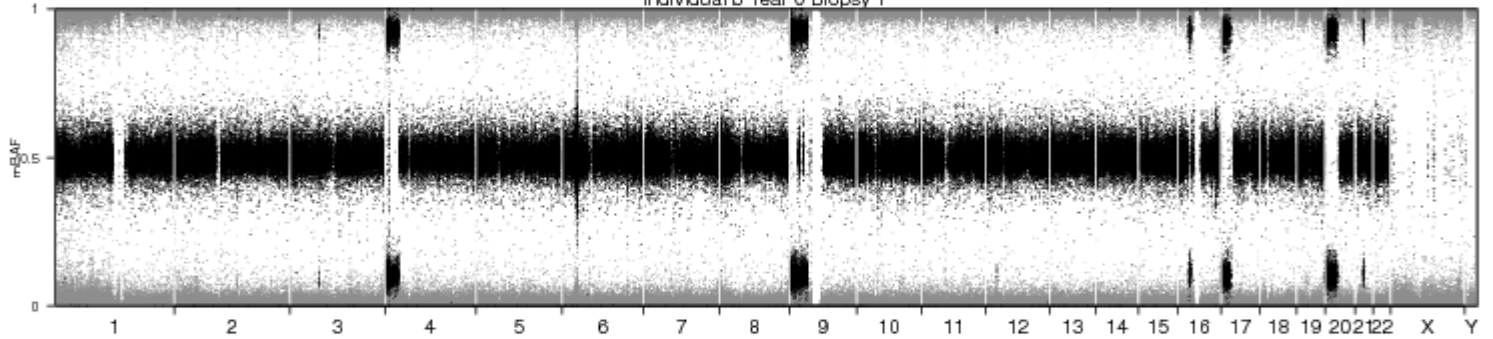

Individual b Year 0 Biopsy 1

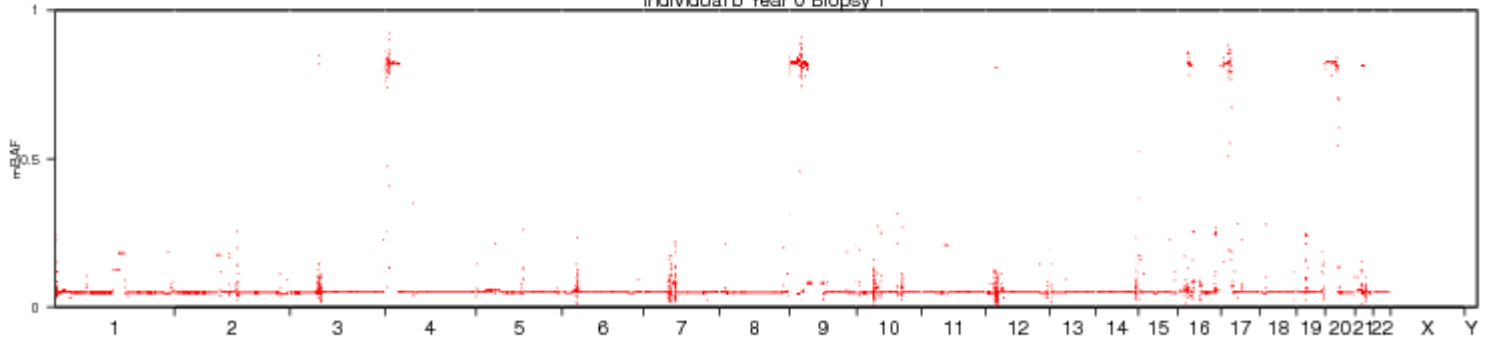

Individual b Year 0 Biopsy 1

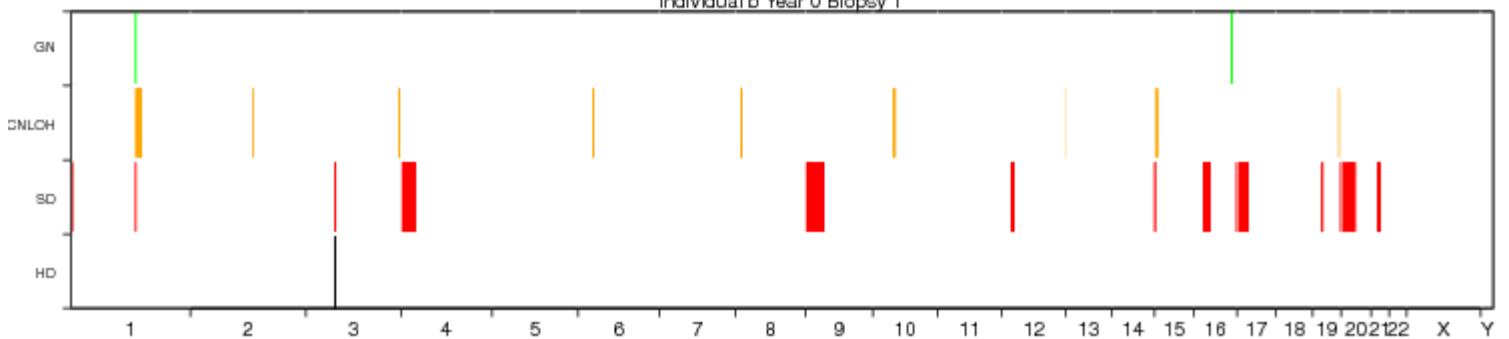

Individual b Year 0 Biopsy 2

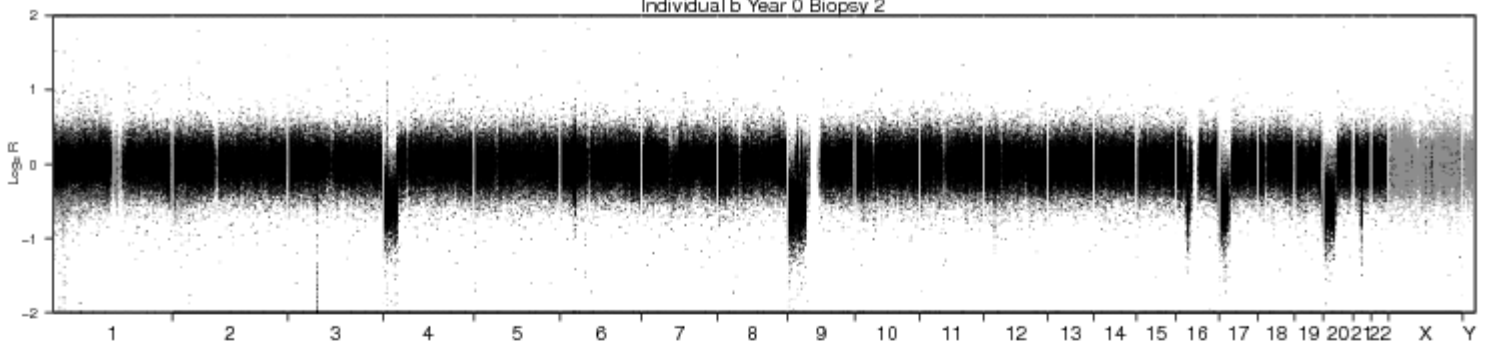

Individual b Year 0 Biopsy 2

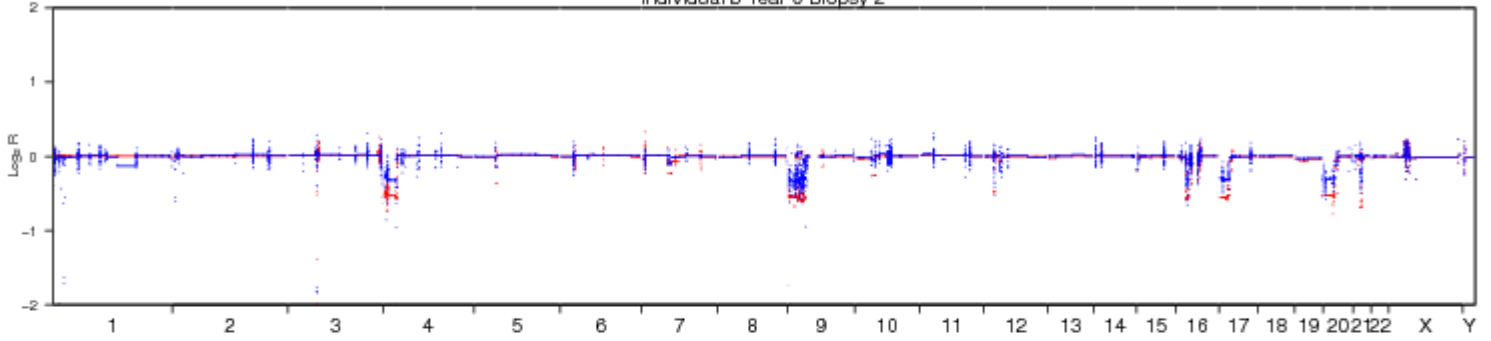

Individual b Year 0 Biopsy 2

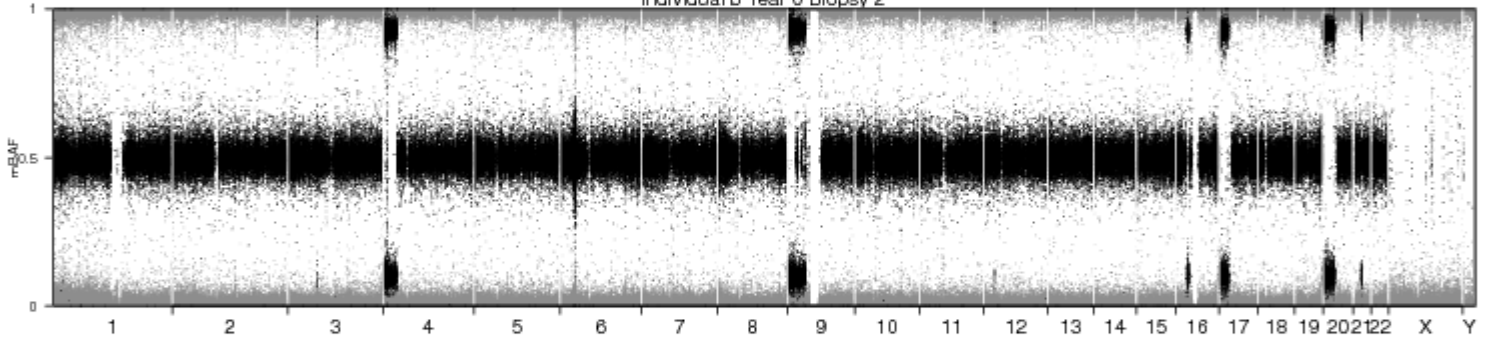

Individual b Year 0 Biopsy 2

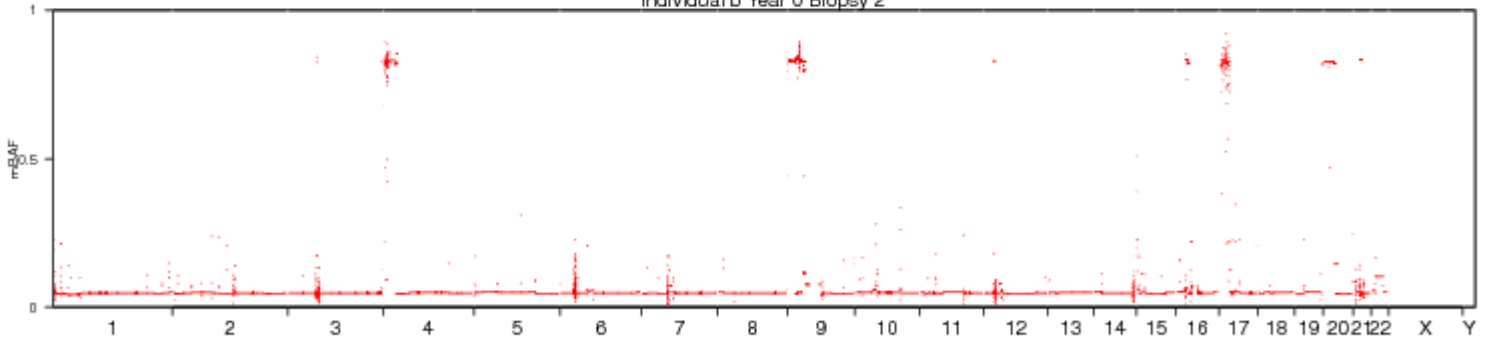

Individual b Year 0 Biopsy 2

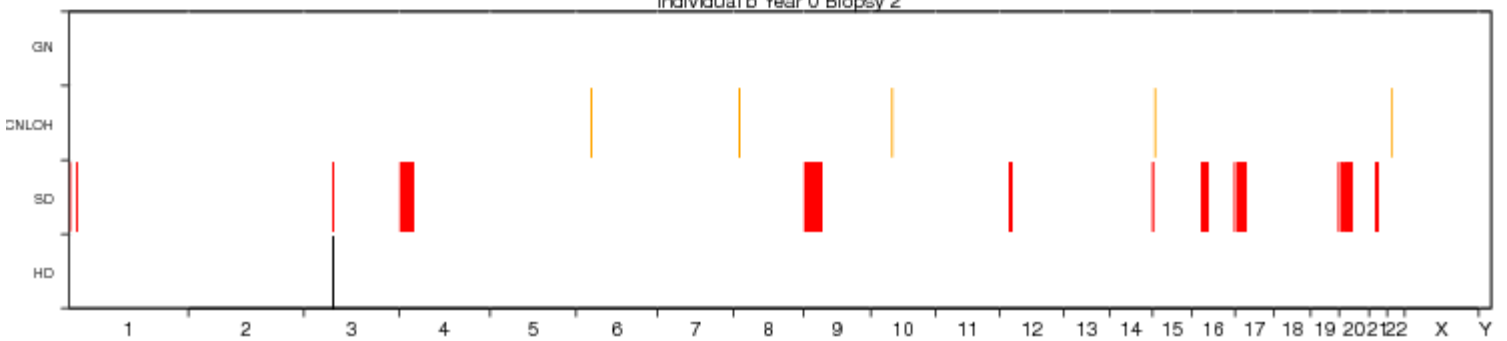

Individual b Year 0 Biopsy 3

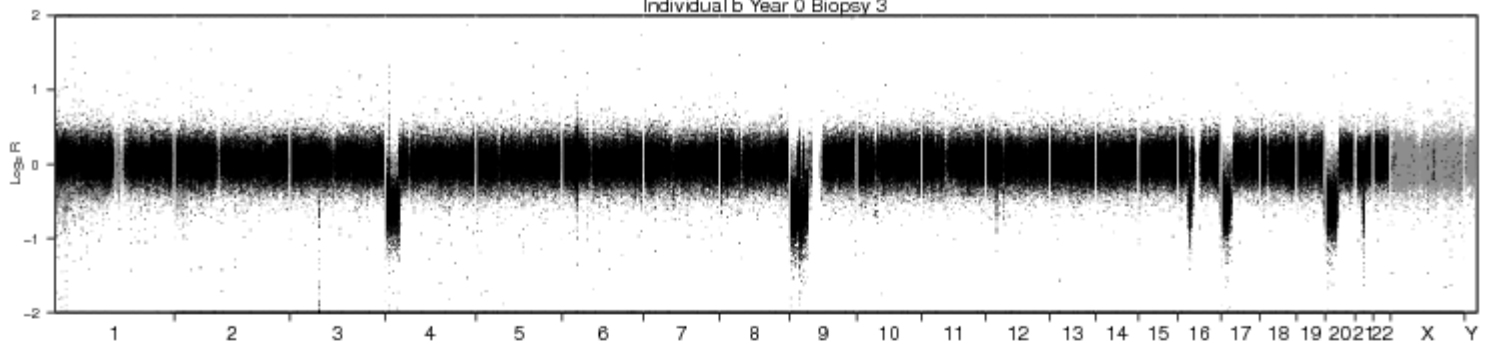

Individual b Year 0 Biopsy 3

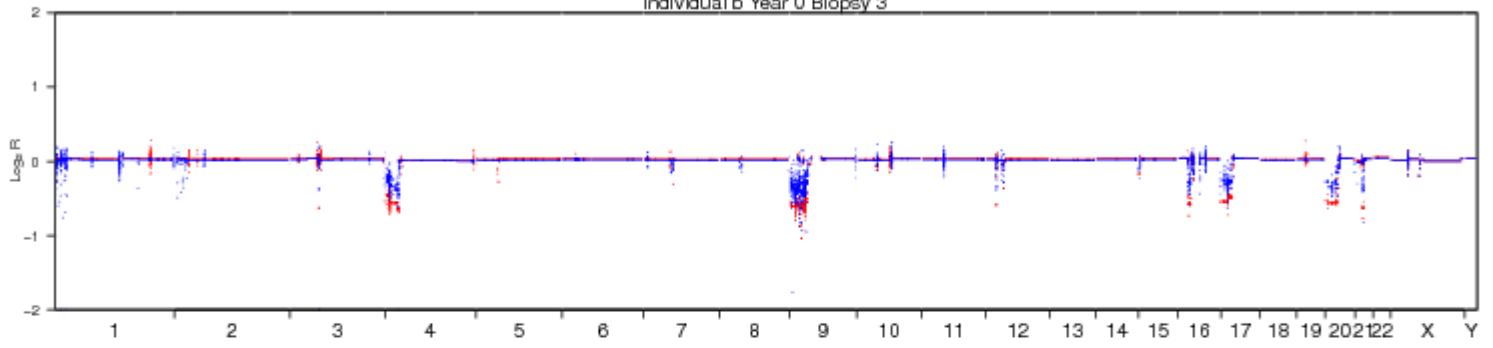

Individual b Year 0 Biopsy 3

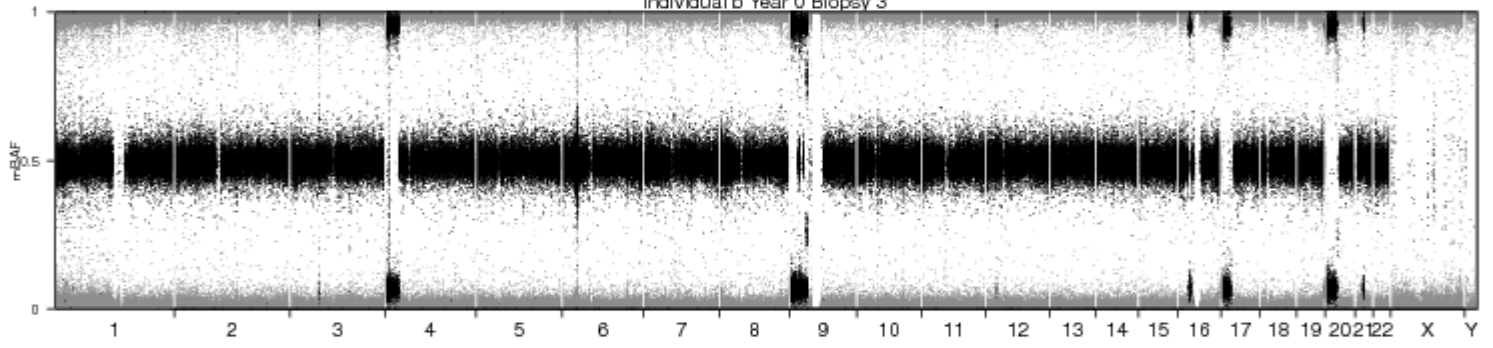

Individual b Year 0 Biopsy 3

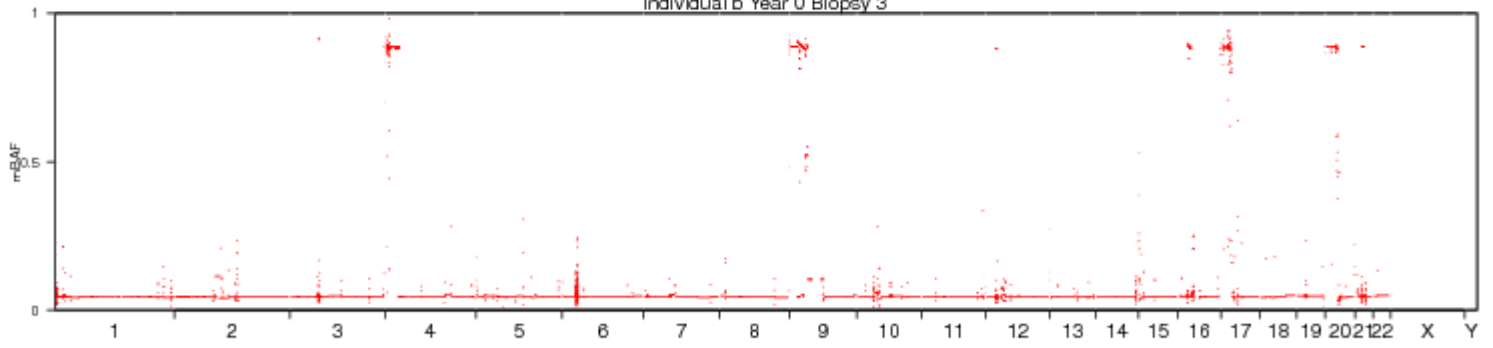

Individual b Year 0 Biopsy 3

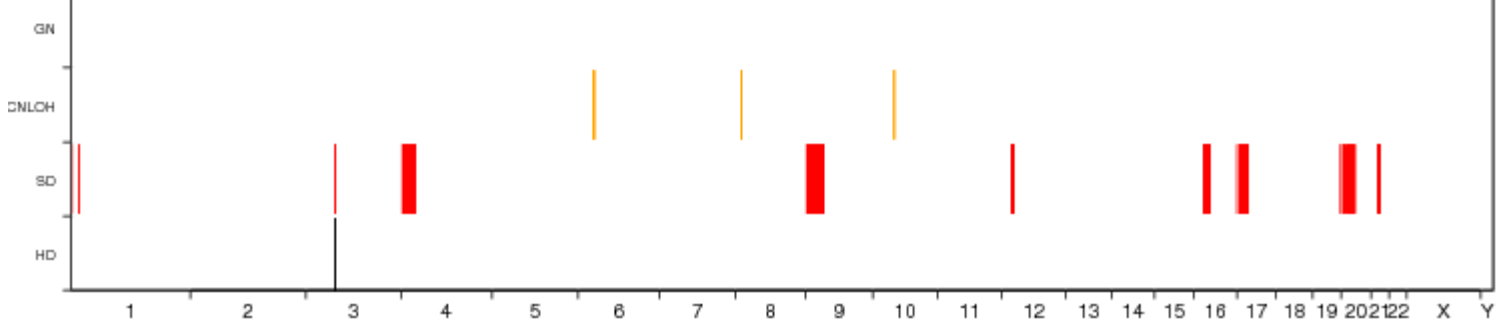

Individual b Year 1.81 Biopsy 4

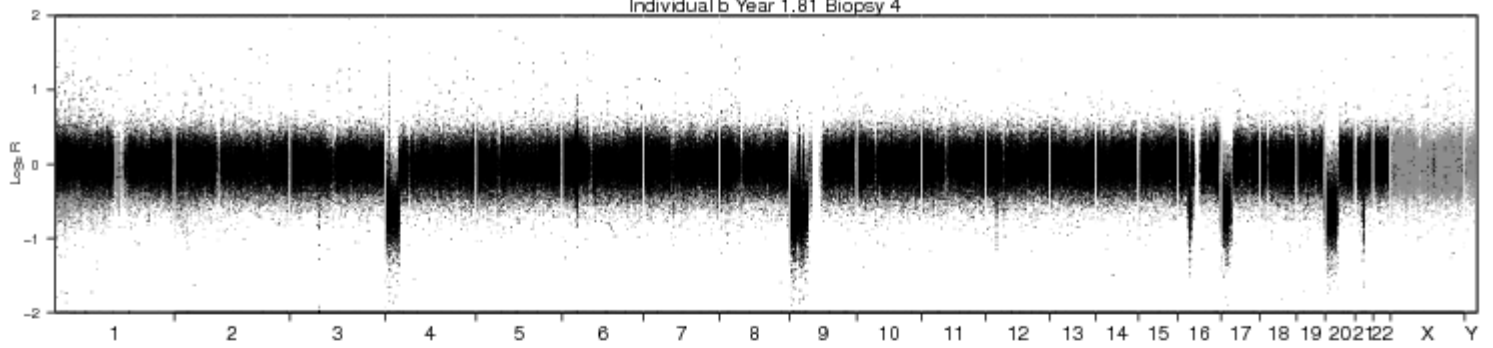

Individual b Year 1.81 Biopsy 4

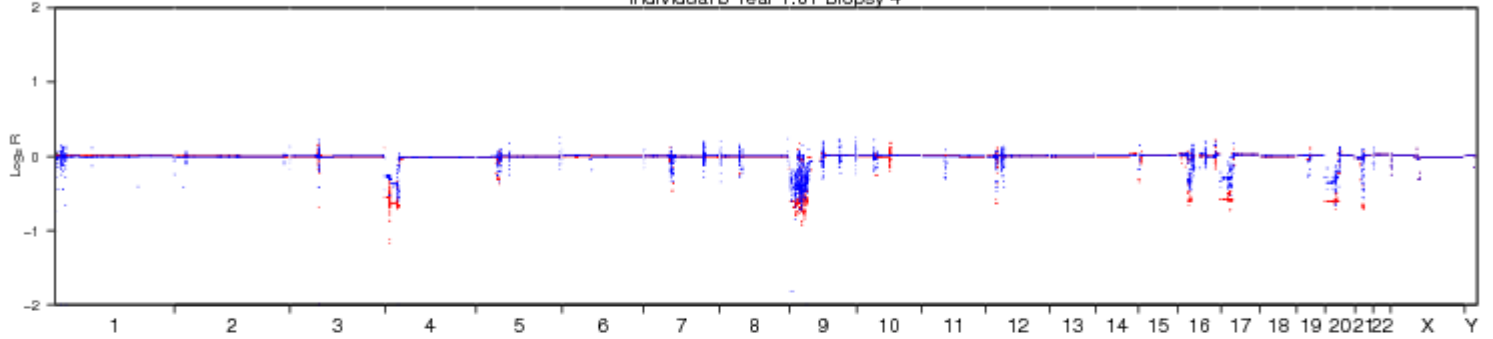

Individual b Year 1.81 Biopsy 4

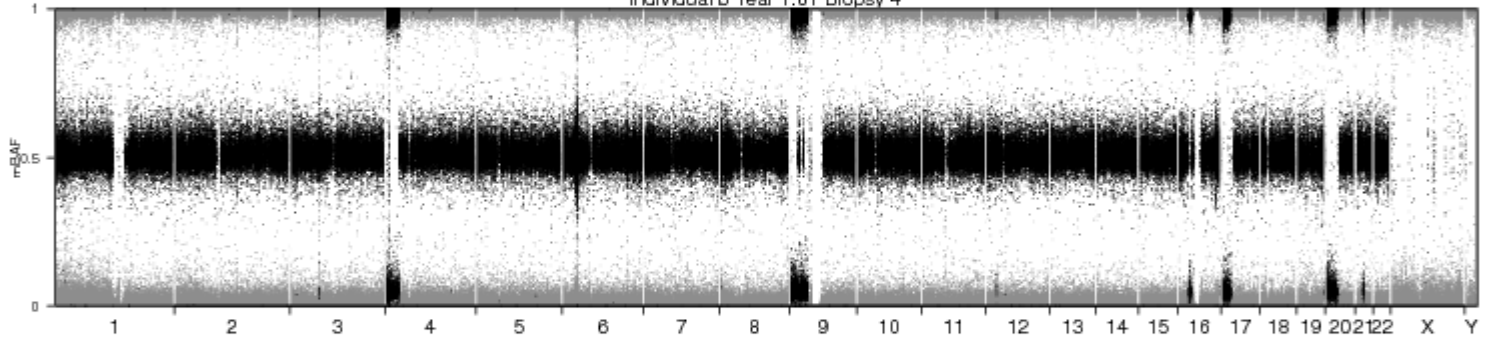

Individual b Year 1.81 Biopsy 4

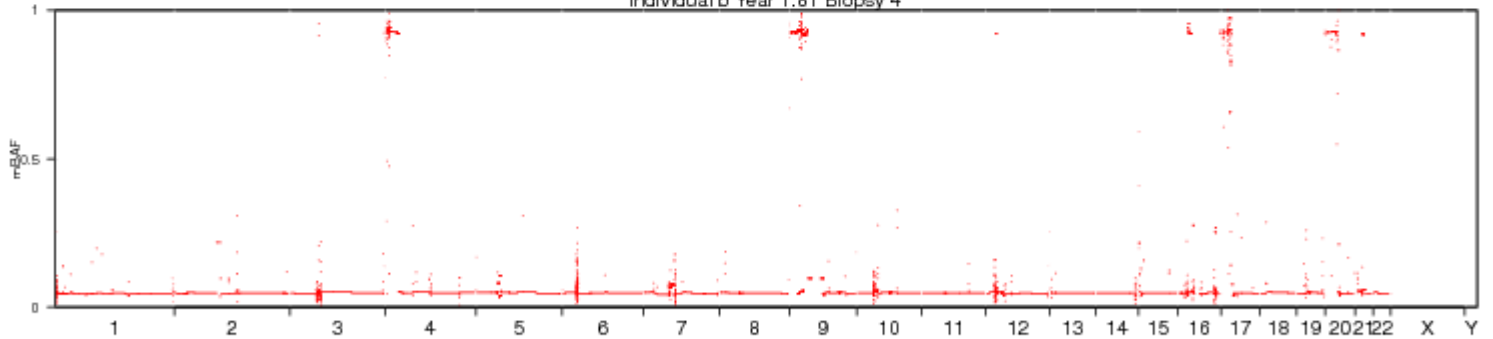

Individual b Year 1.81 Biopsy 4

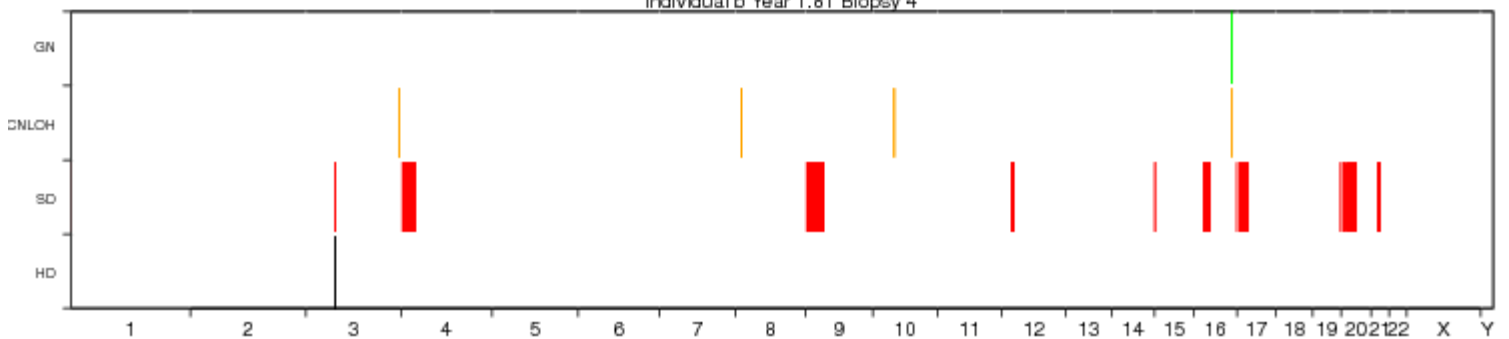



Individual b Year 1.81 Biopsy 5

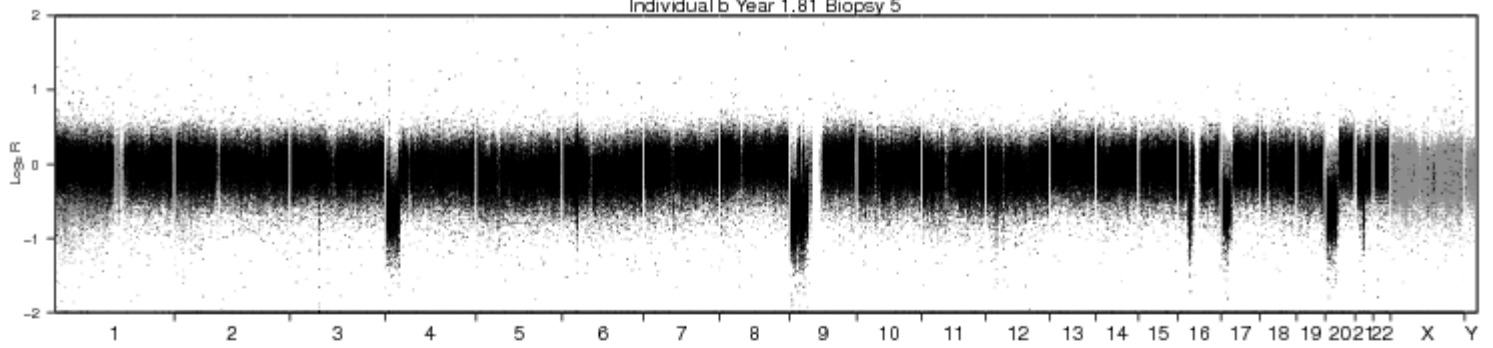

Individual b Year 1.81 Biopsy 5

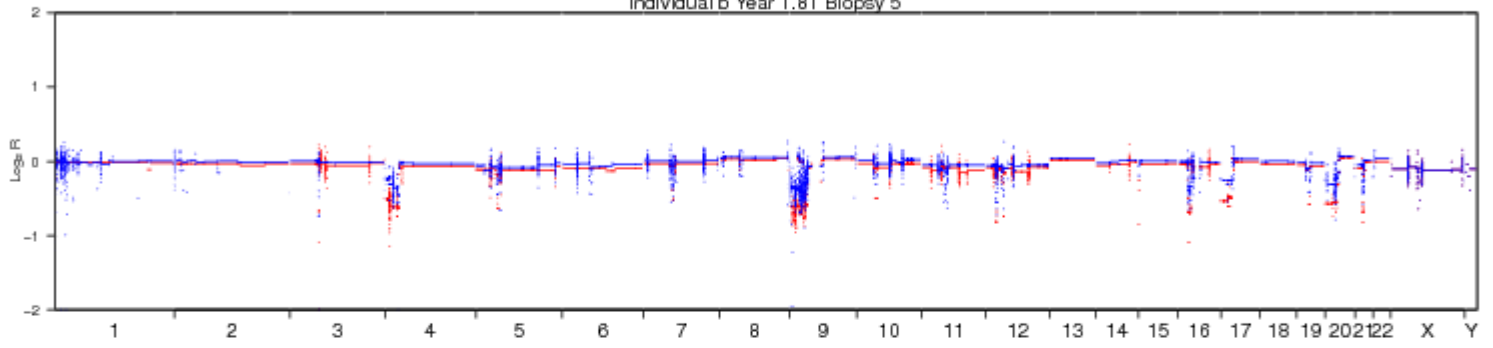

Individual b Year 1.81 Biopsy 5

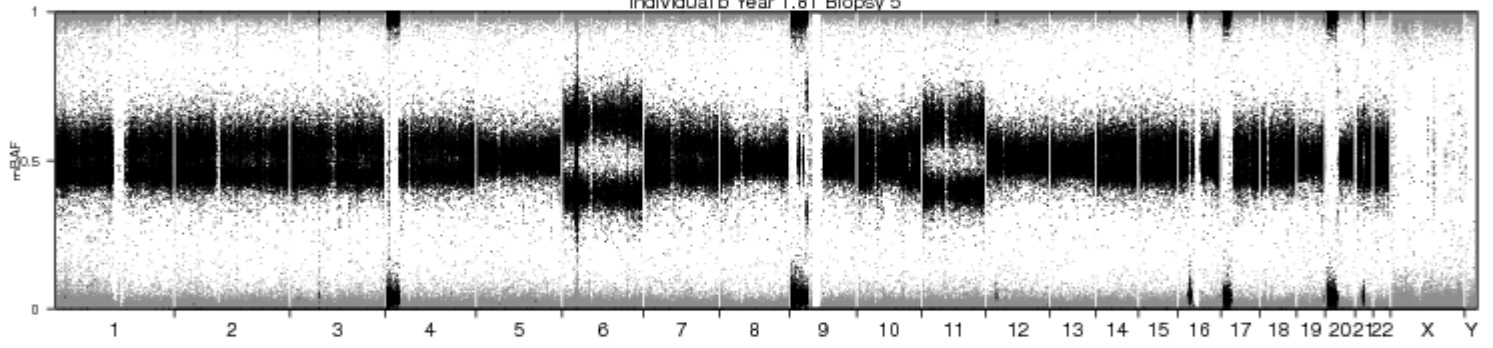

Individual b Year 1.81 Biopsy 5

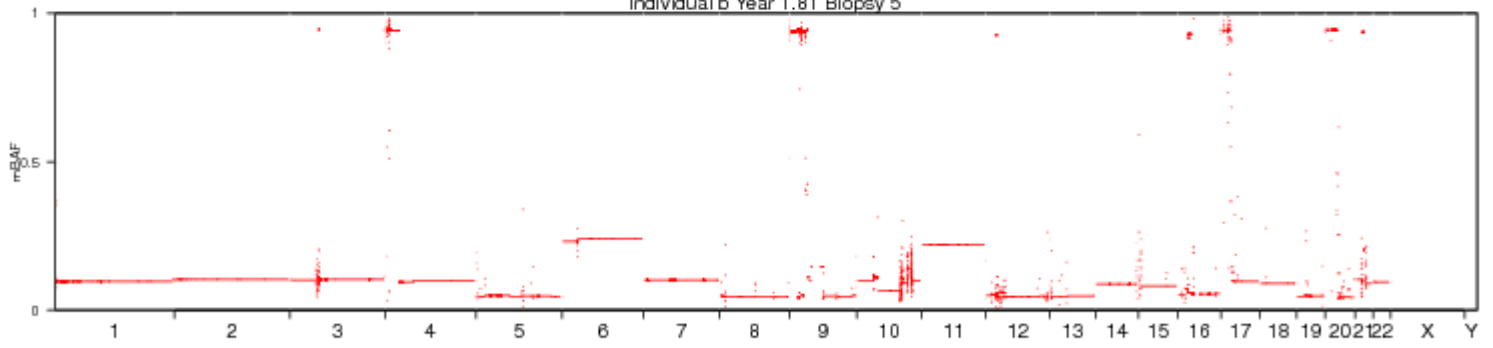

Individual b Year 1.81 Biopsy 5

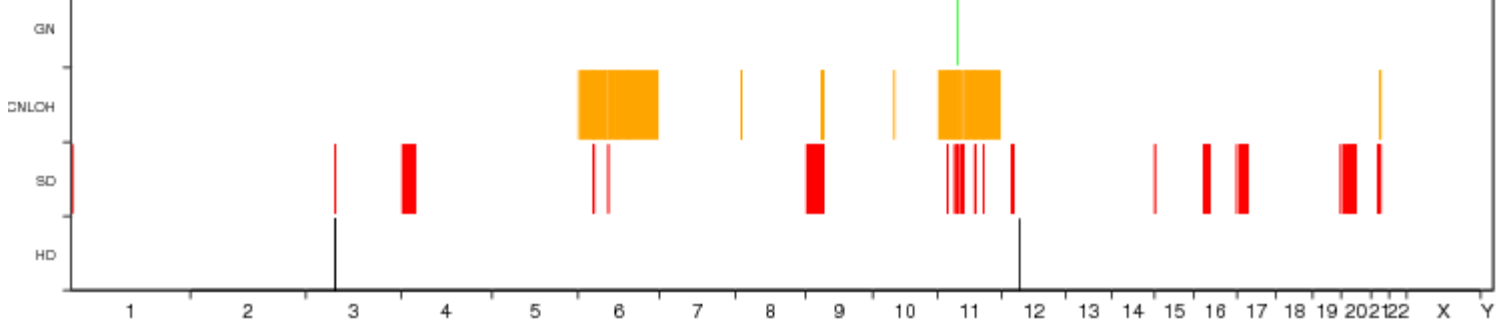

Individual b Year 1.81 Biopsy 6

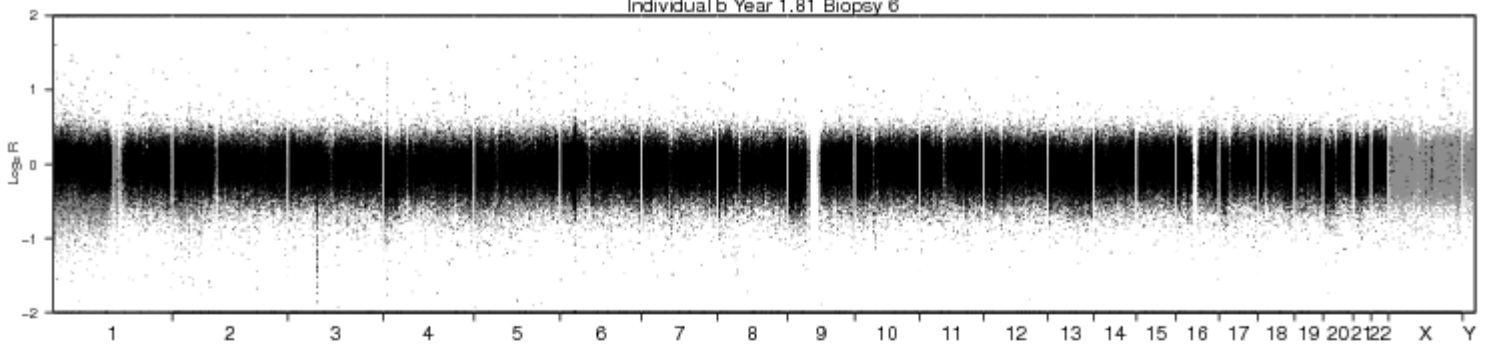

Individual b Year 1.81 Biopsy 6

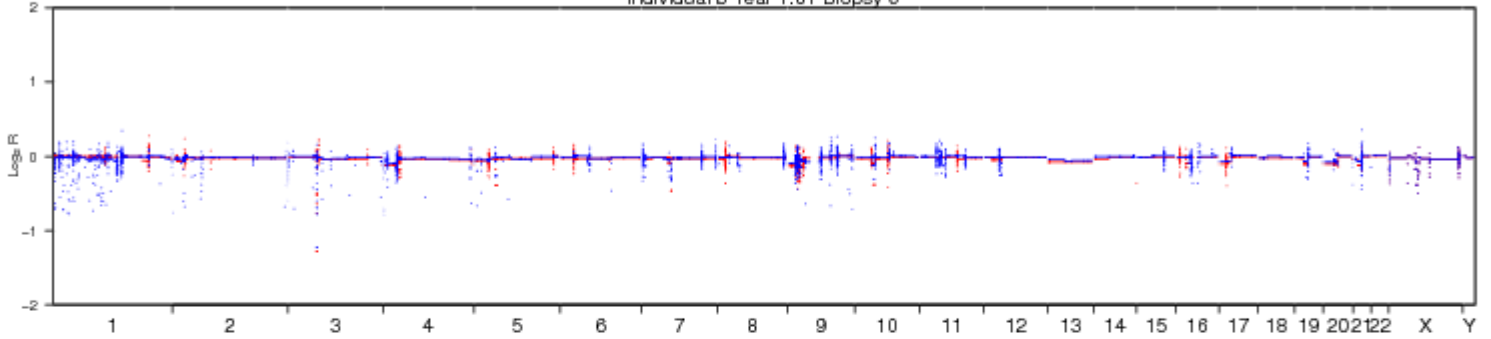

Individual b Year 1.81 Biopsy 6

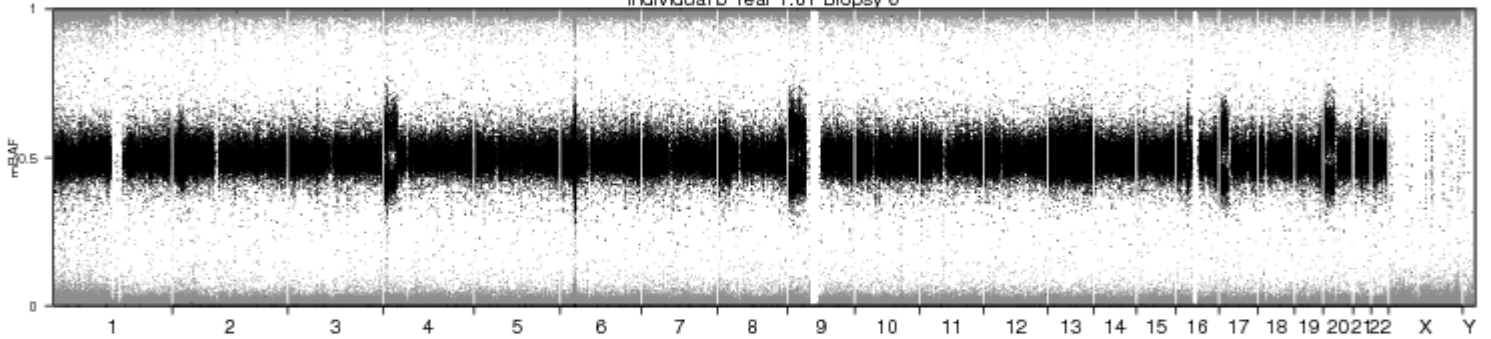

Individual b Year 1.81 Biopsy 6

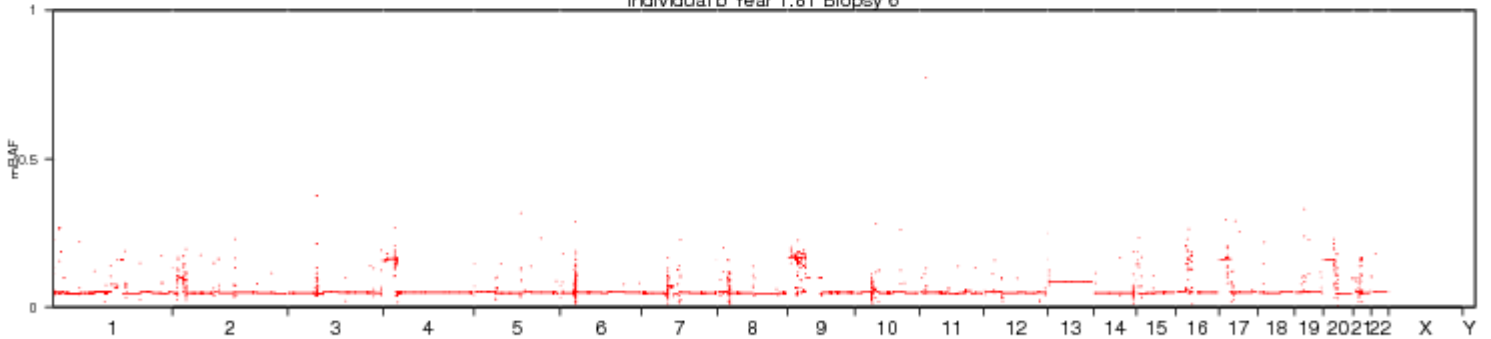

Individual b Year 1.81 Biopsy 6

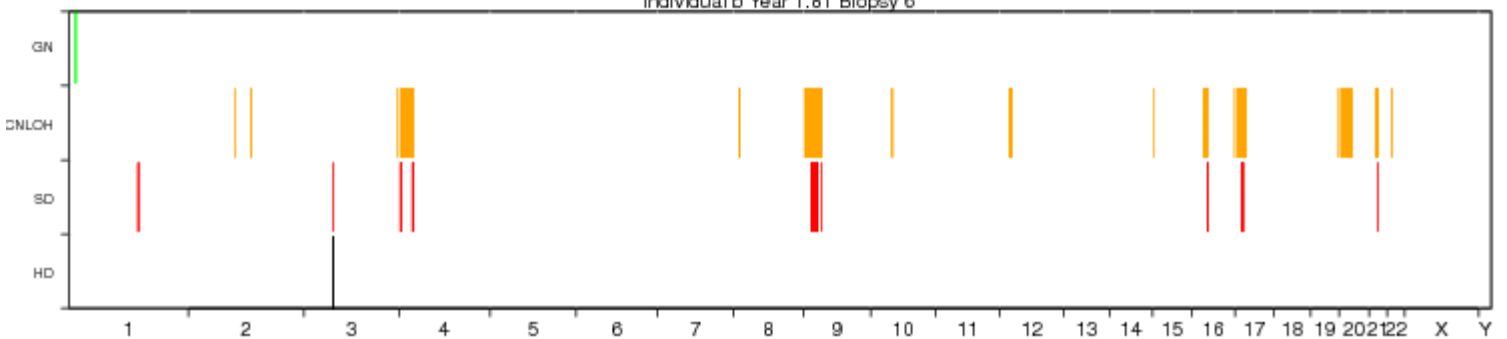

Individual b Year 5.19 Biopsy 7

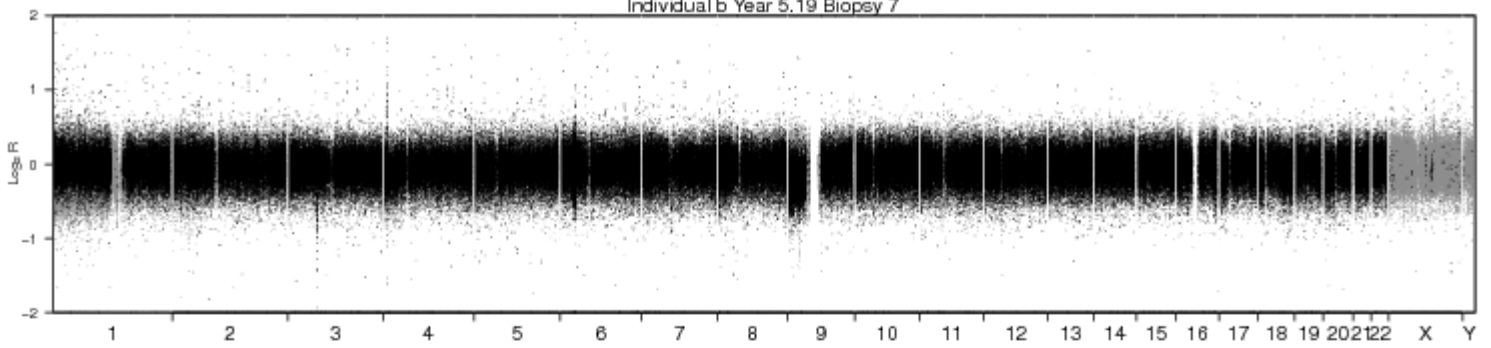

Individual b Year 5.19 Biopsy 7

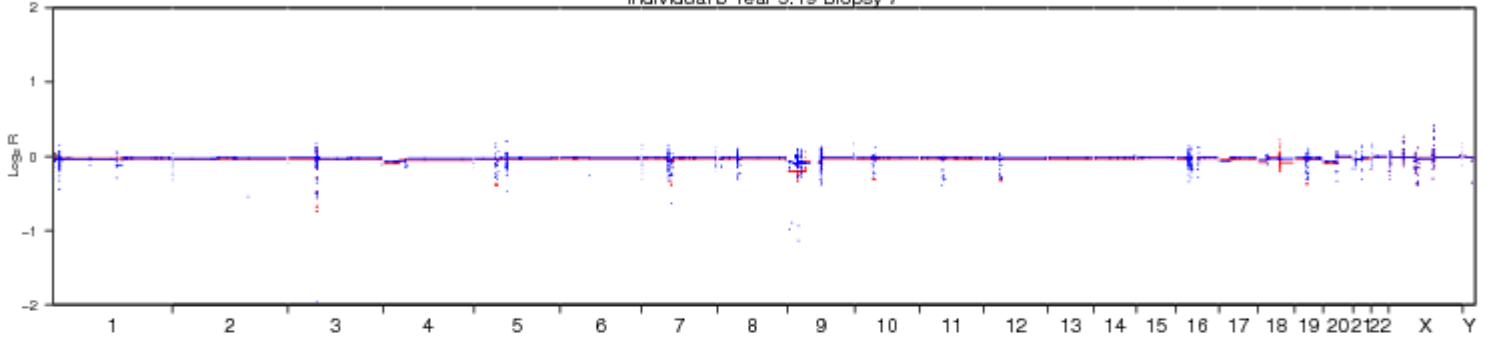

Individual b Year 5.19 Biopsy 7

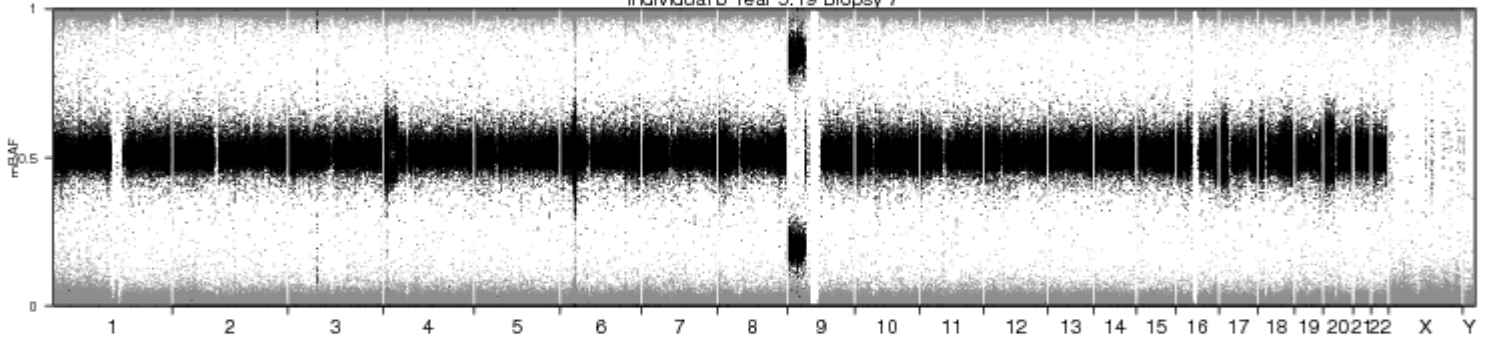

Individual b Year 5.19 Biopsy 7

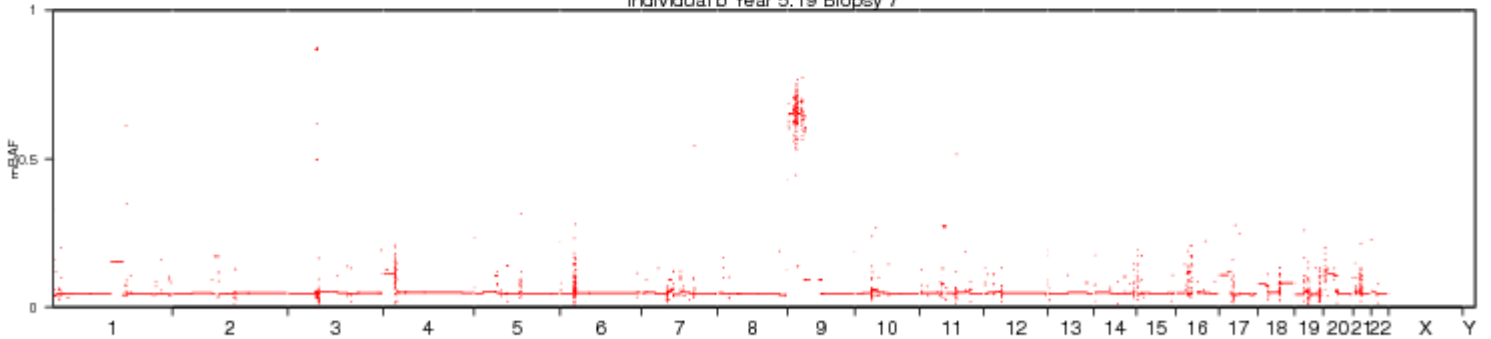

Individual b Year 5.19 Biopsy 7

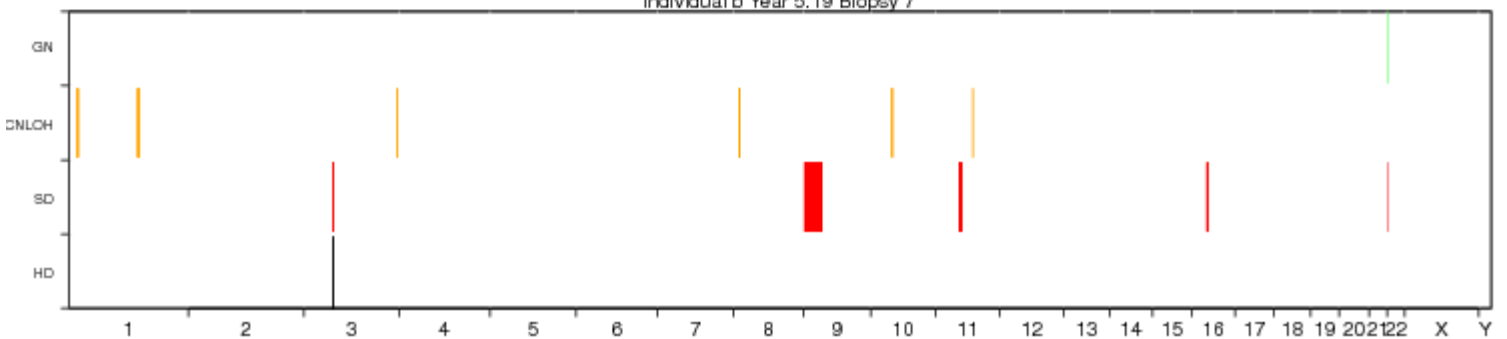

Individual b Year 9.01 Biopsy 8

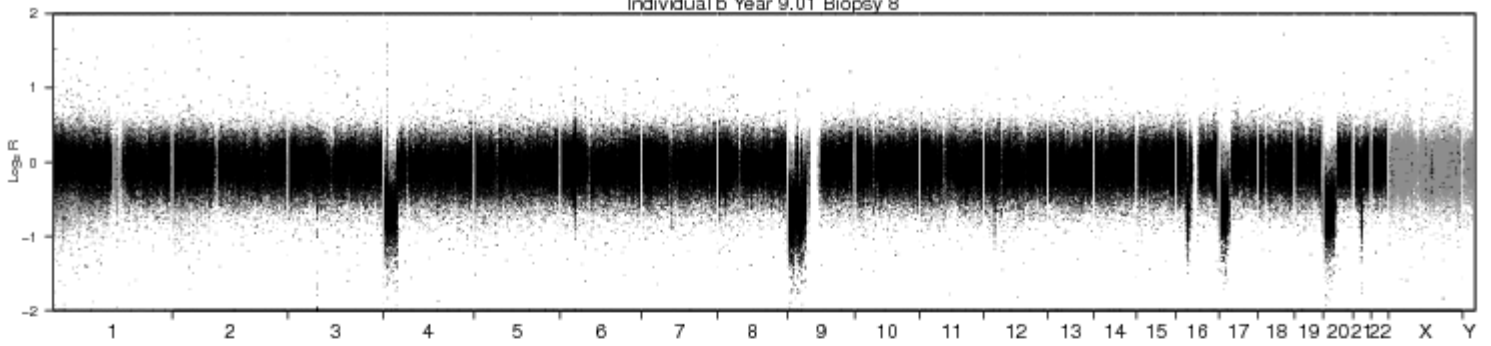

Individual b Year 9.01 Biopsy 8

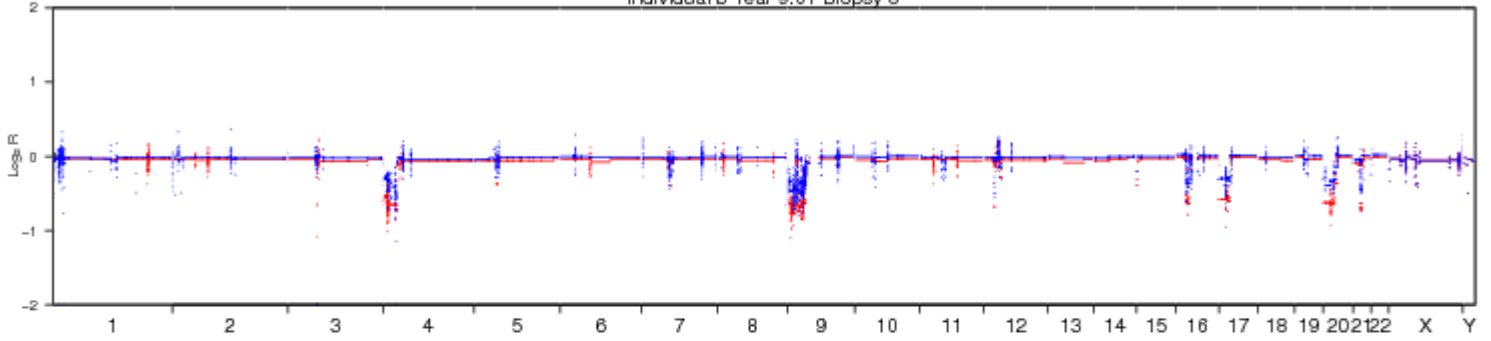

Individual b Year 9.01 Biopsy 8

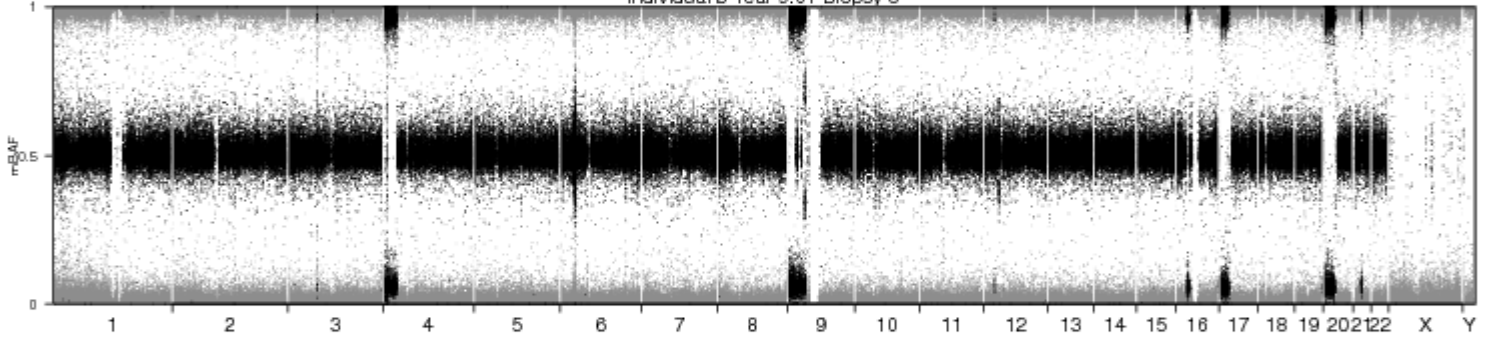

Individual b Year 9.01 Biopsy 8

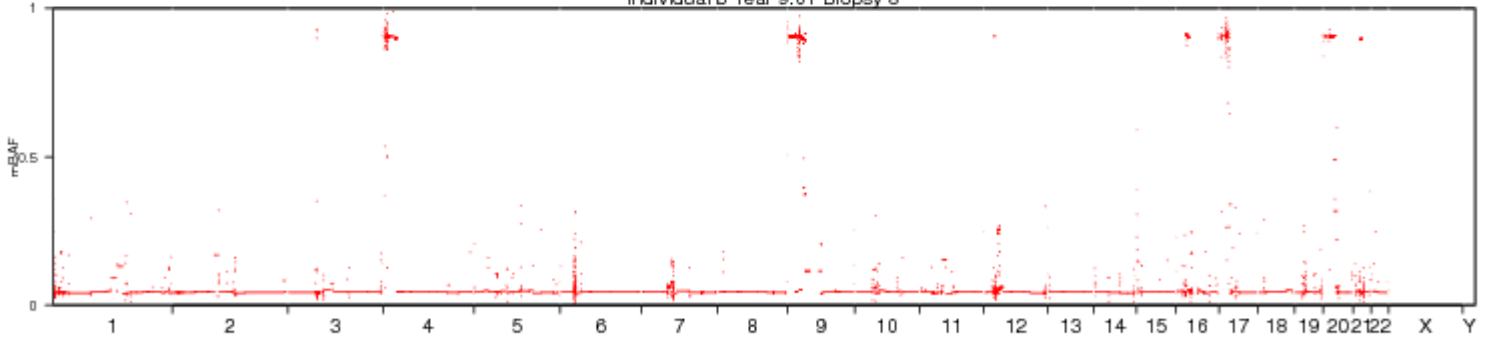

Individual b Year 9.01 Biopsy 8

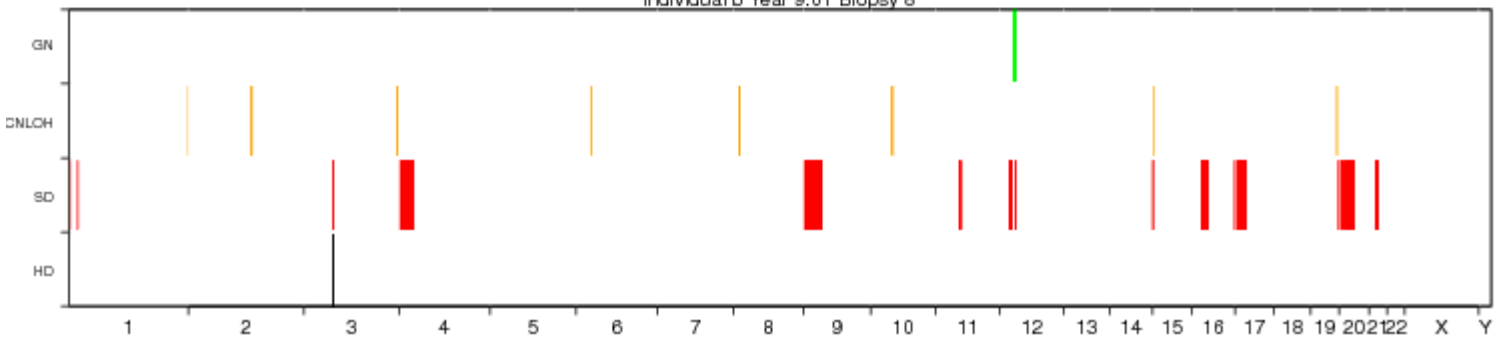



Individual b Year 9.01 Biopsy 9

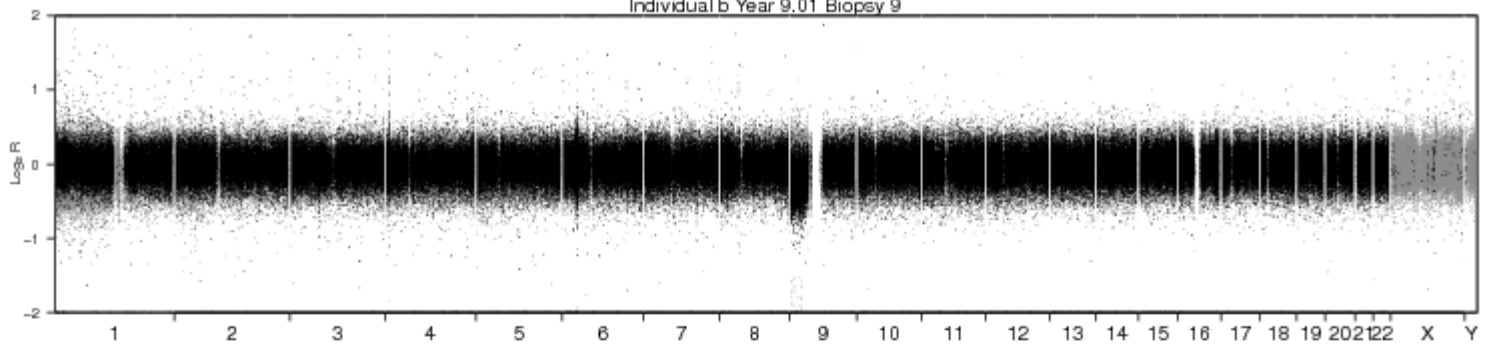

Individual b Year 9.01 Biopsy 9

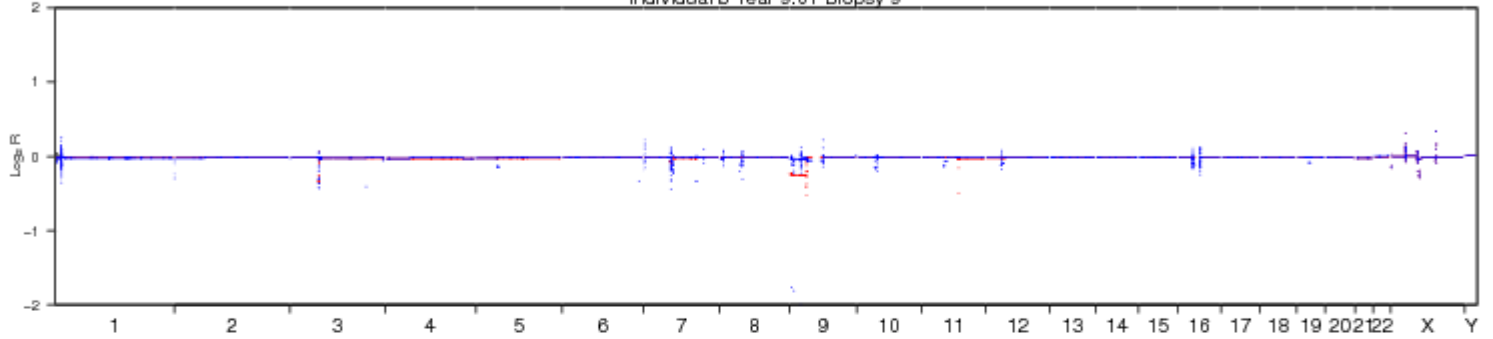

Individual b Year 9.01 Biopsy 9

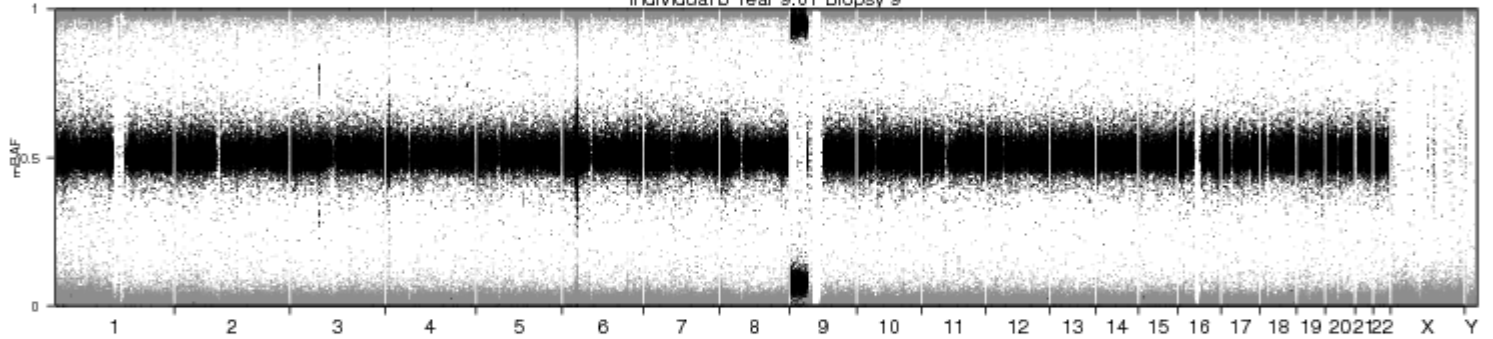

Individual b Year 9.01 Biopsy 9

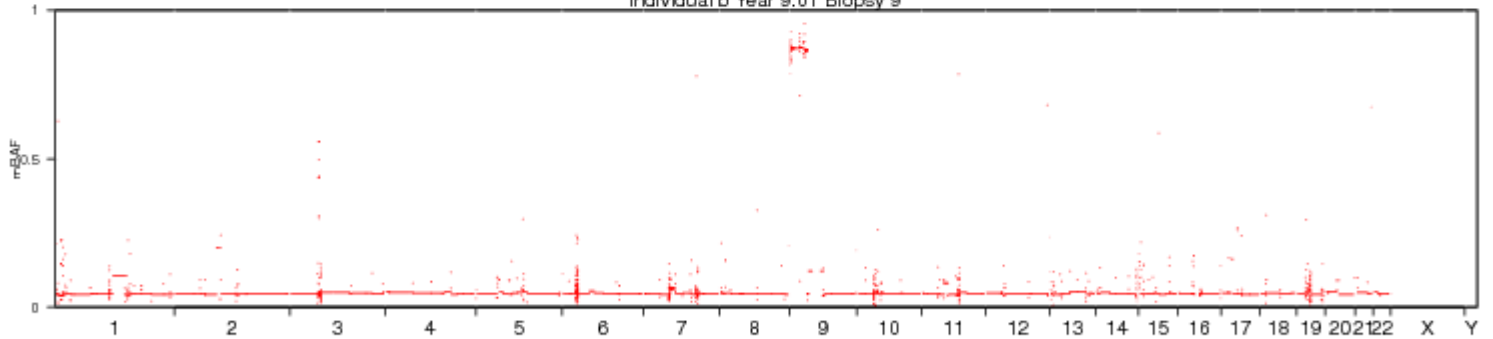

Individual b Year 9.01 Biopsy 9

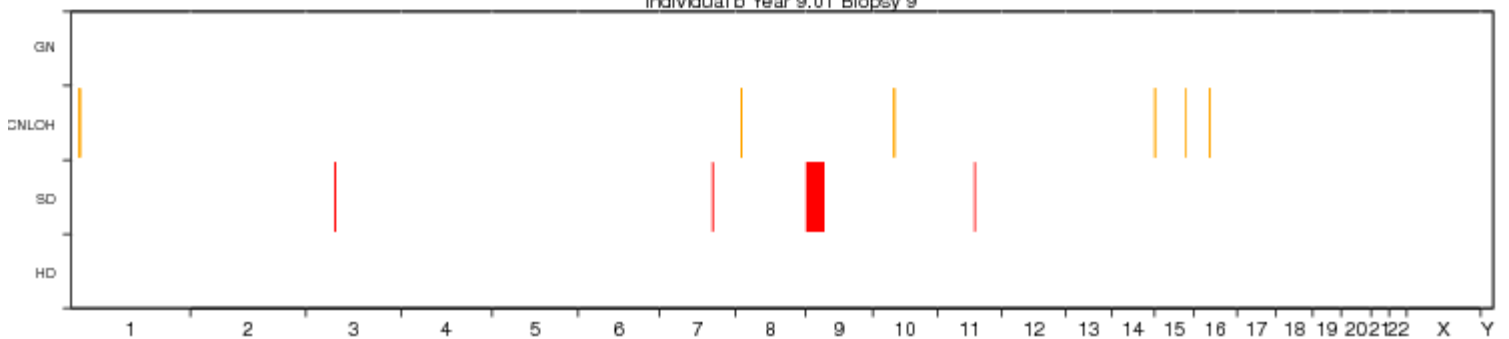

Individual b Year 10.66 Biopsy 10

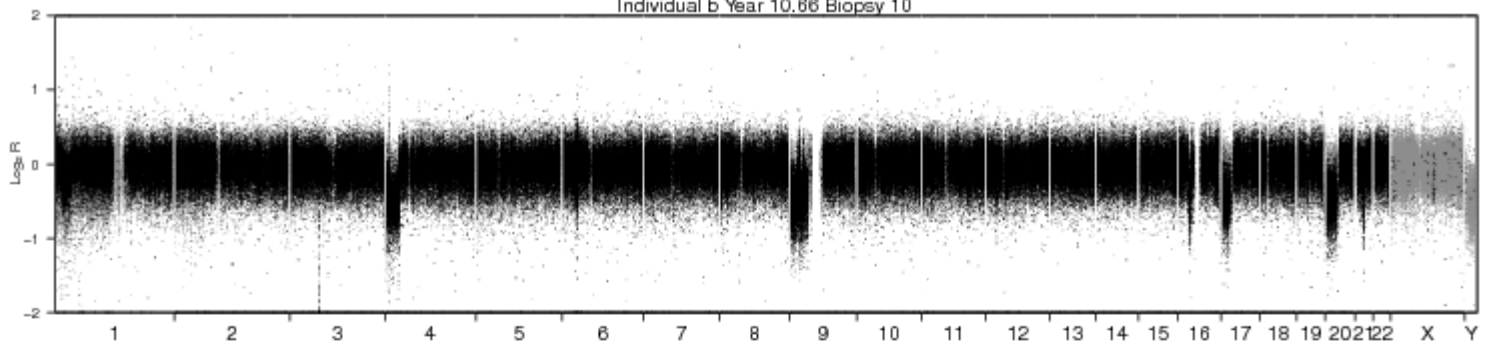

Individual b Year 10.66 Biopsy 10

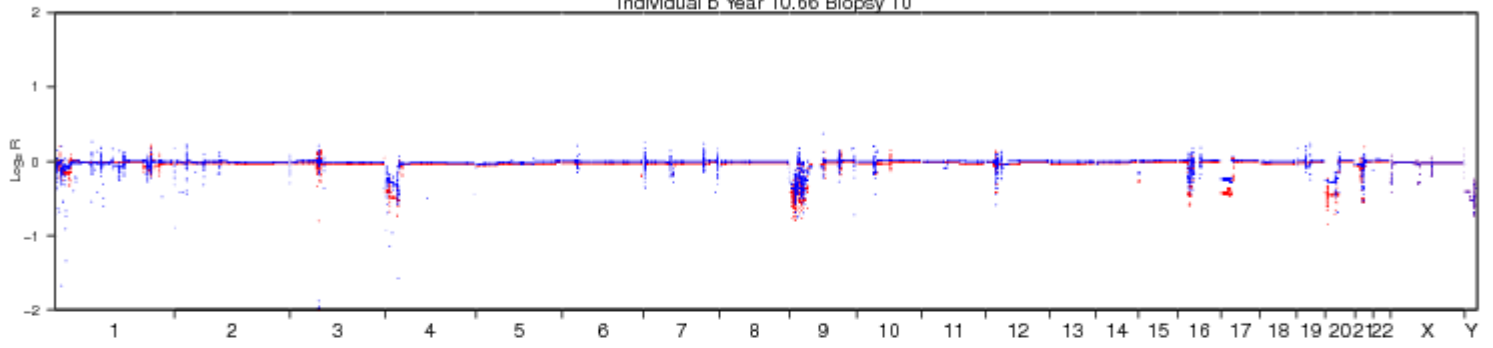

Individual b Year 10.66 Biopsy 10

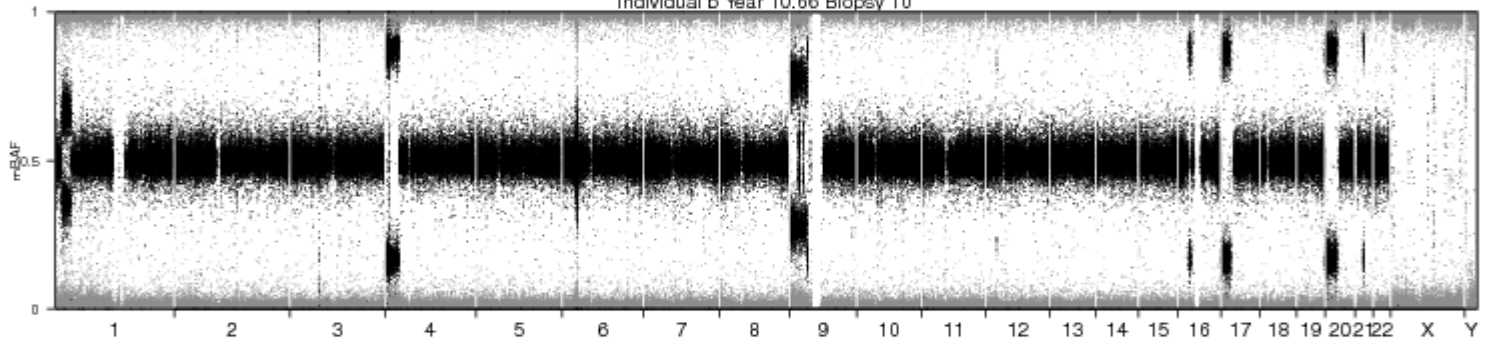

Individual b Year 10.66 Biopsy 10

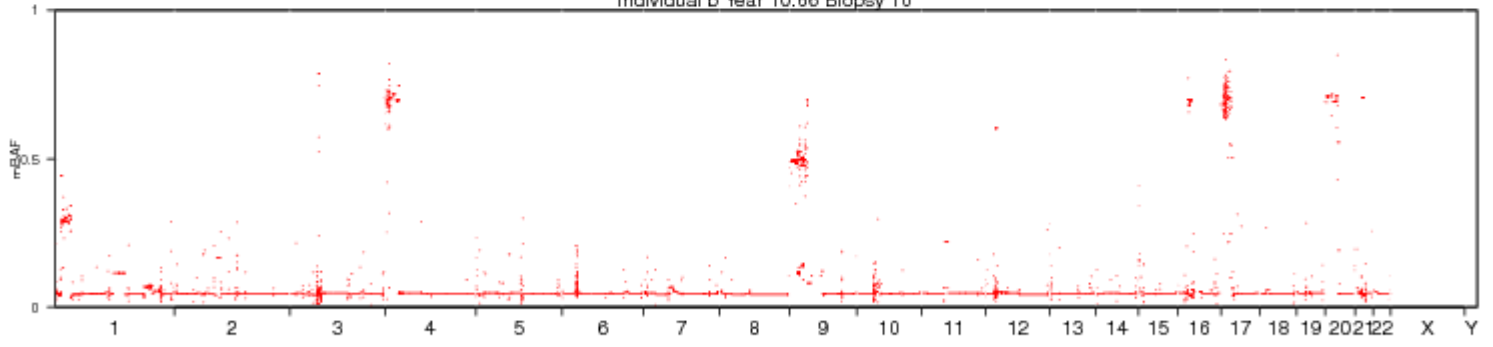

Individual b Year 10.66 Biopsy 10

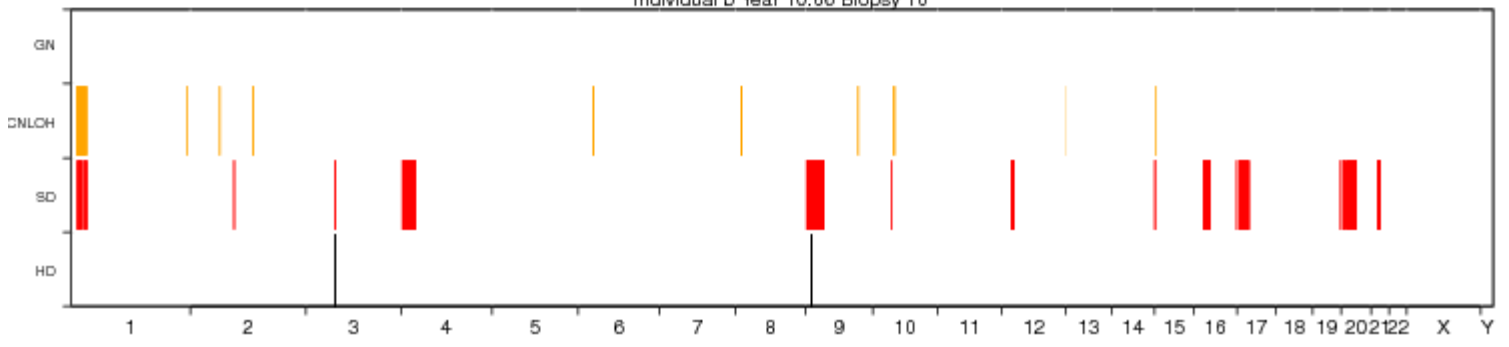

Individual c Year 0 Biopsy 1

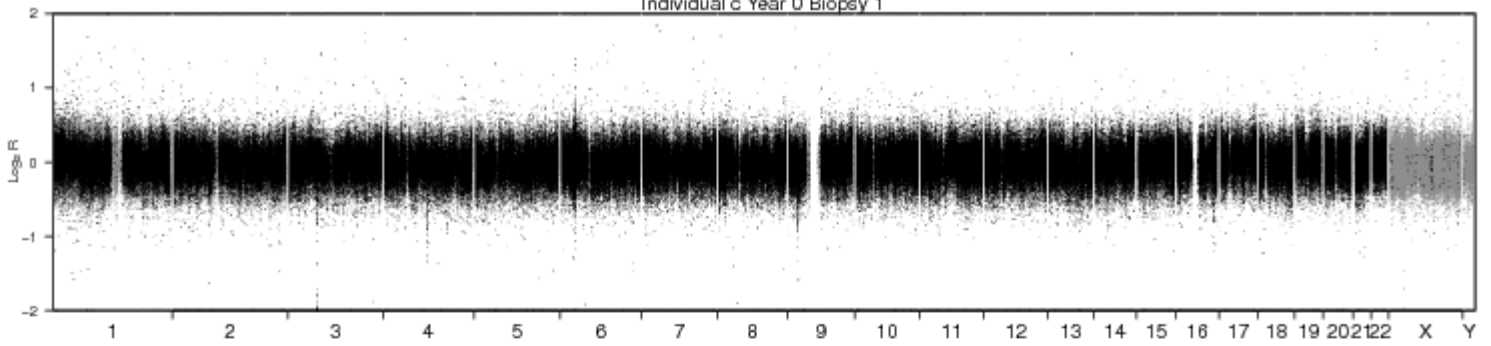

Individual c Year 0 Biopsy 1

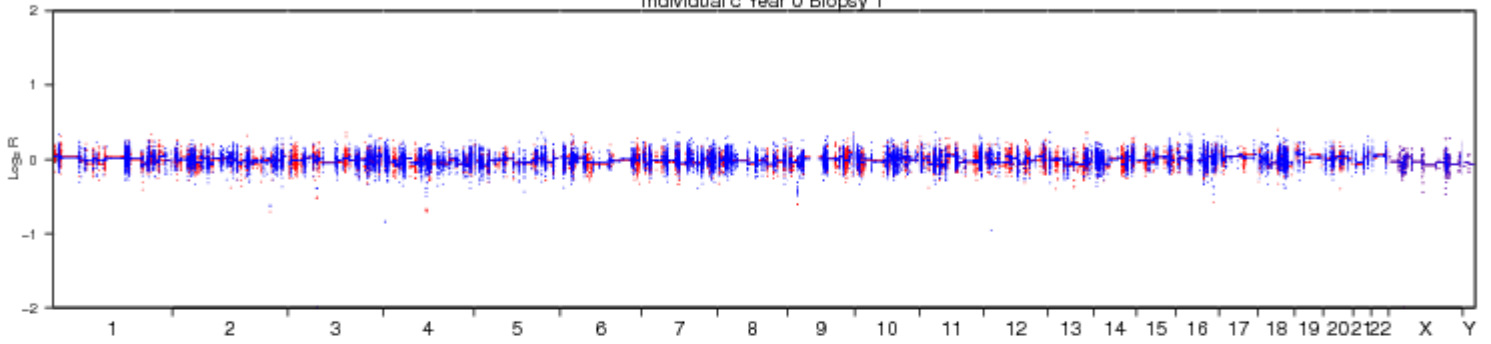

Individual c Year 0 Biopsy 1

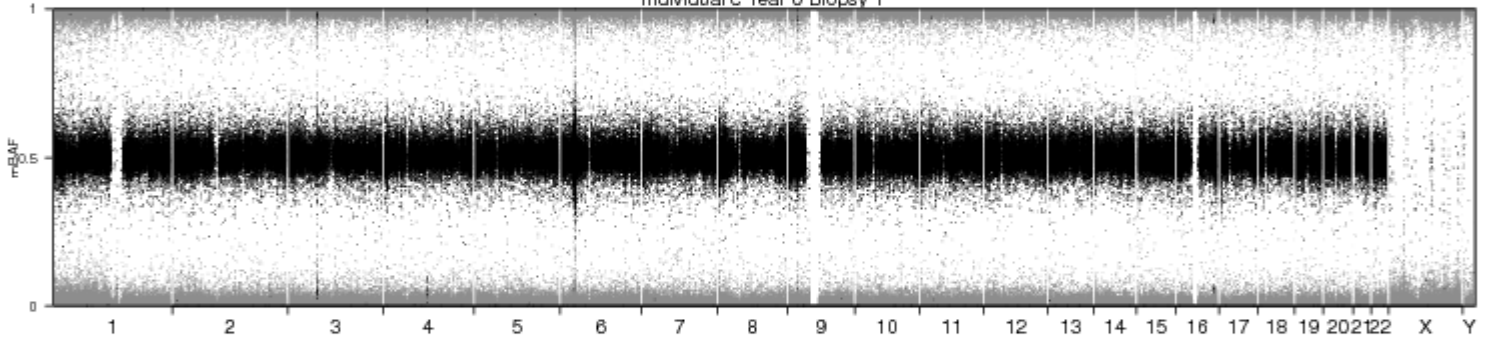

Individual c Year 0 Biopsy 1

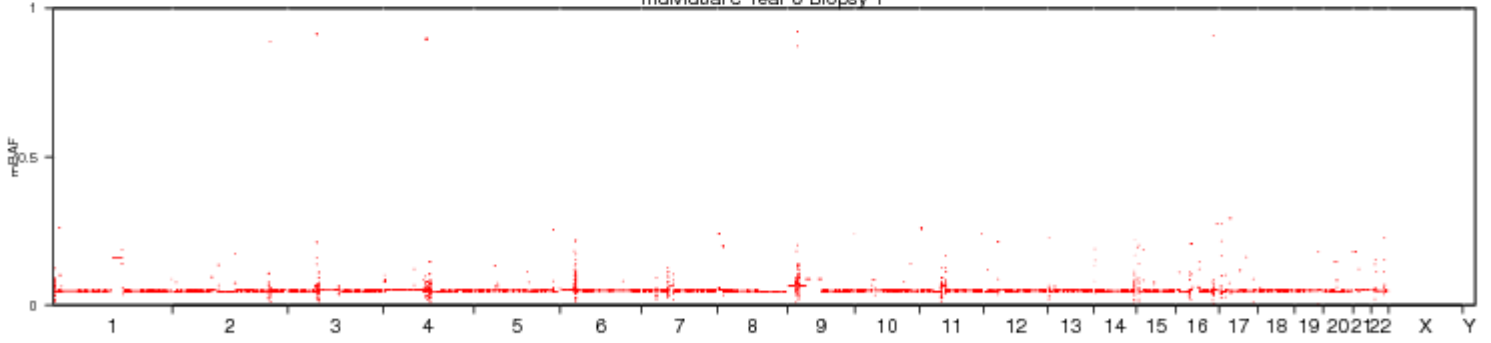

Individual c Year 0 Biopsy 1

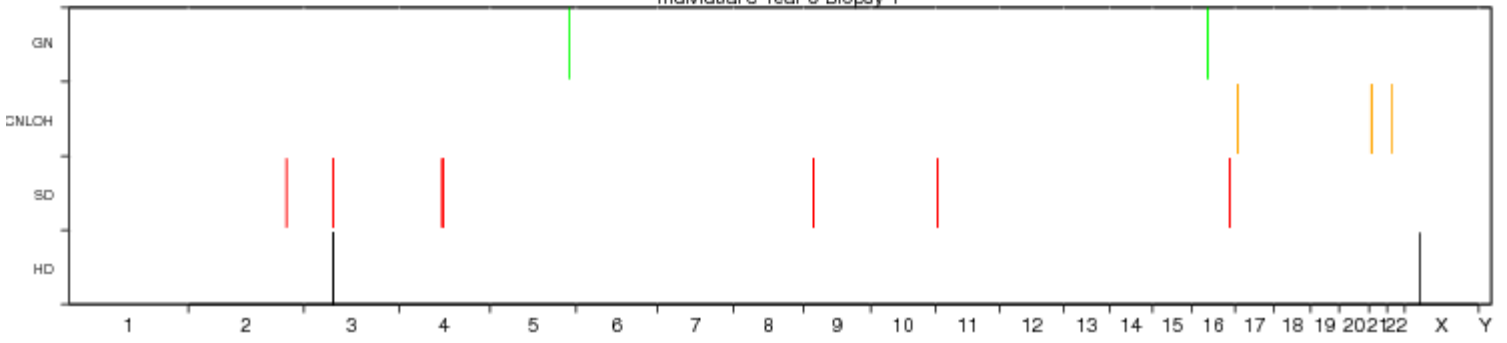

Individual c Year 0 Biopsy 2

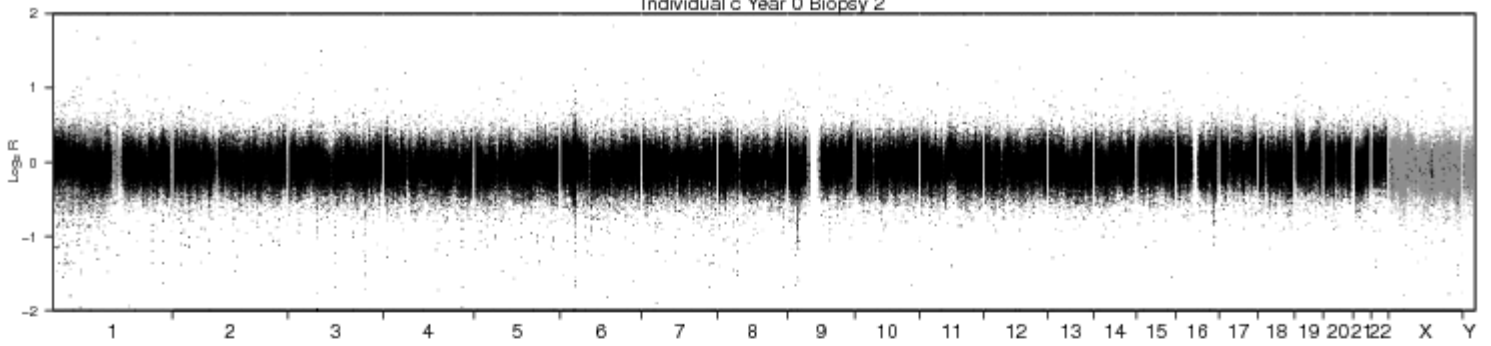

Individual c Year 0 Biopsy 2

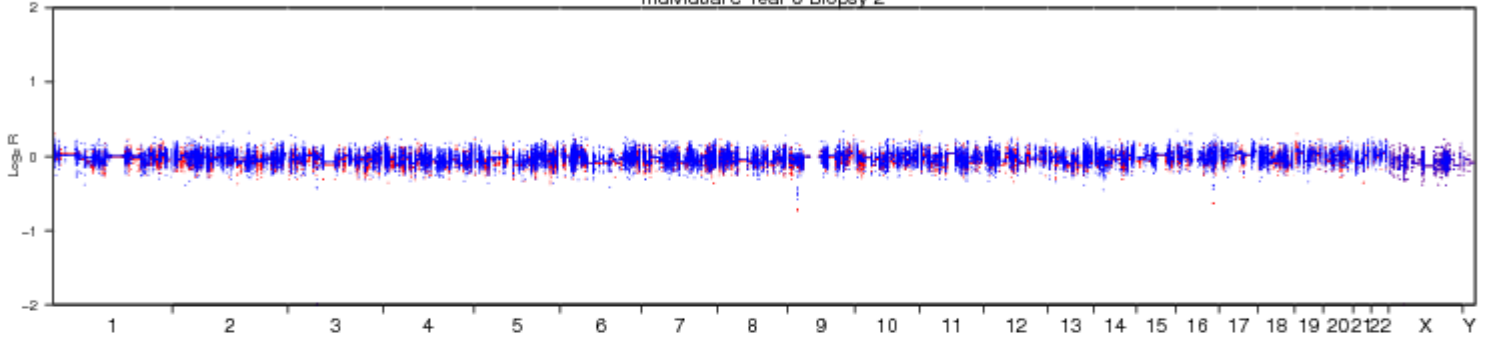

Individual c Year 0 Biopsy 2

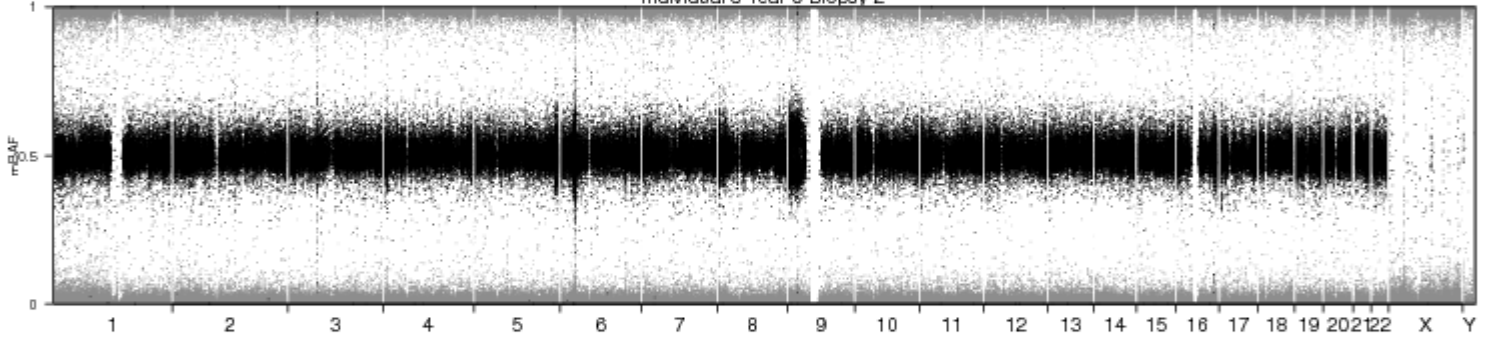

Individual c Year 0 Biopsy 2

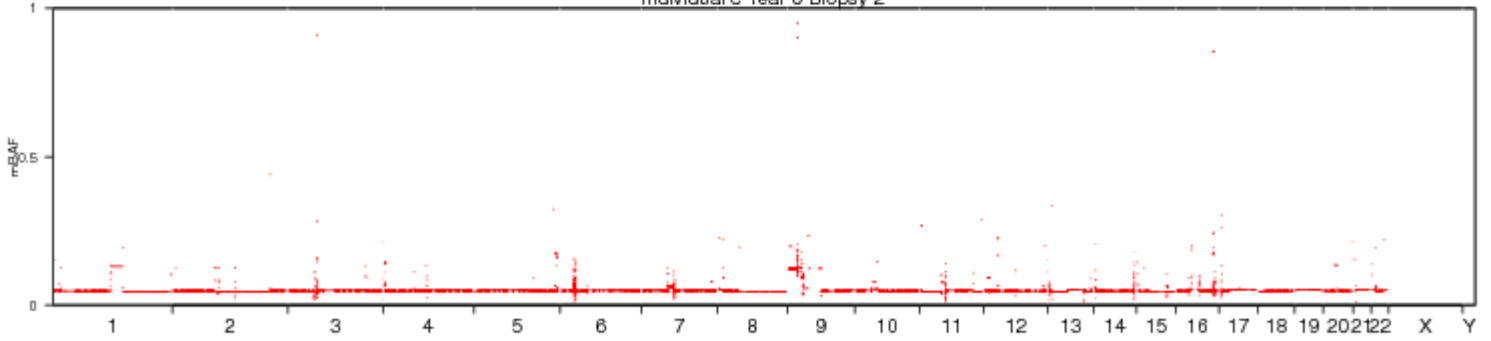

Individual c Year 0 Biopsy 2

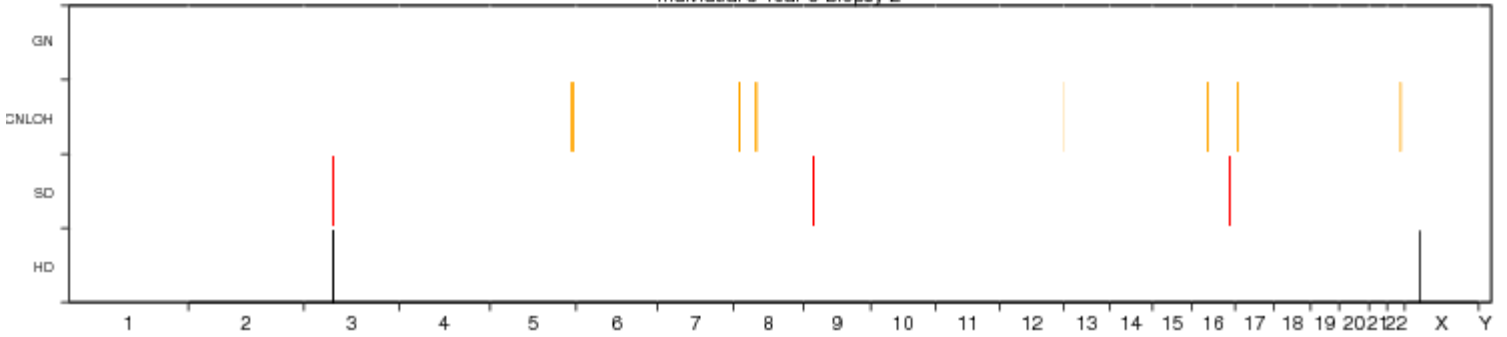



Individual c Year 1.53 Biopsy 3

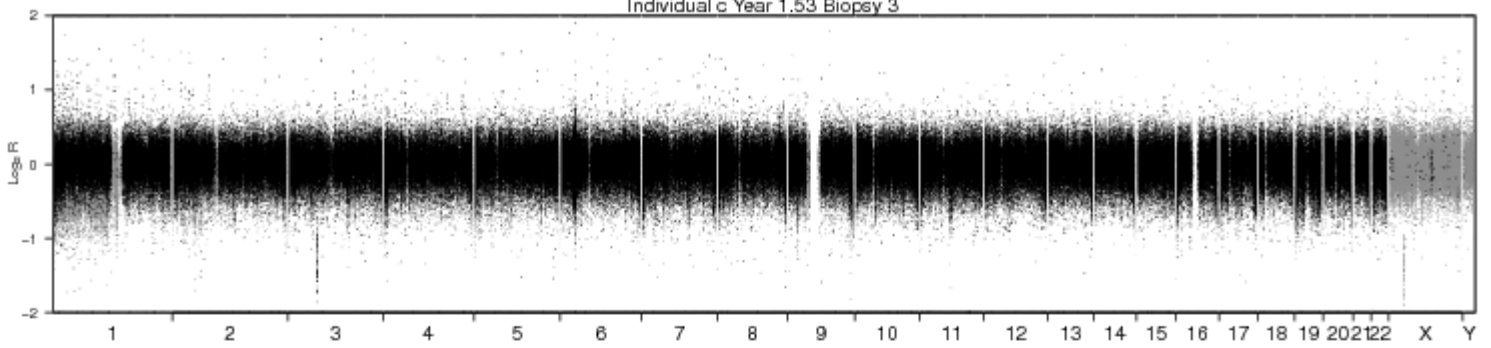

Individual c Year 1.53 Biopsy 3

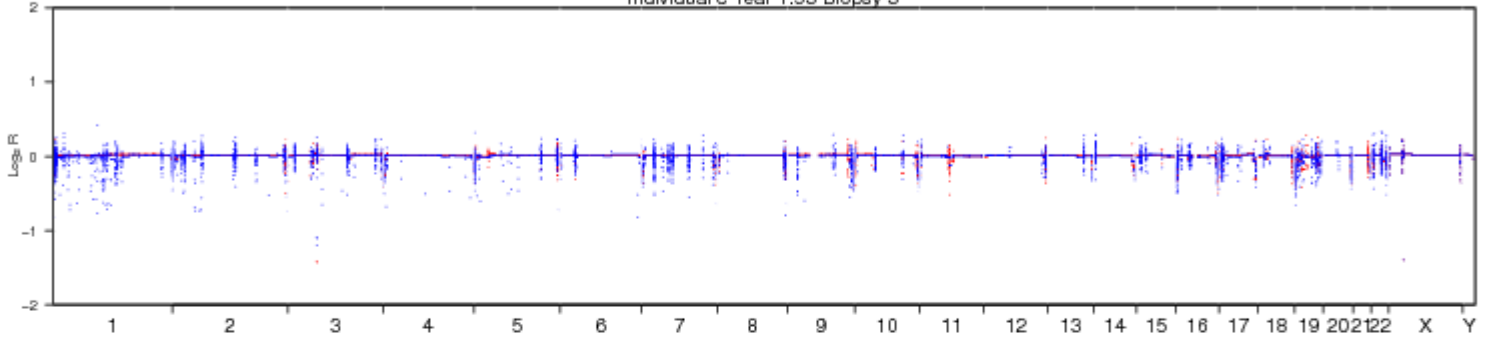

Individual c Year 1.53 Biopsy 3

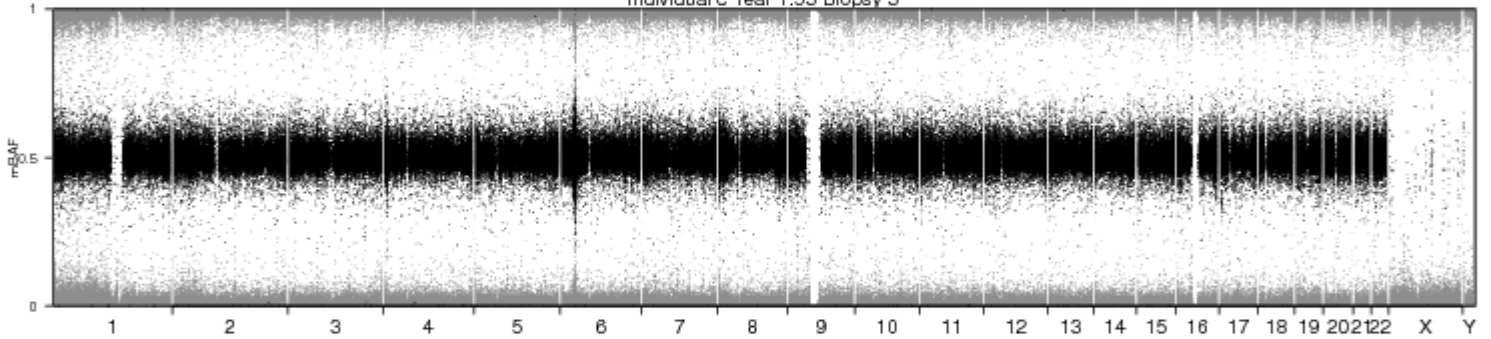

Individual c Year 1.53 Biopsy 3

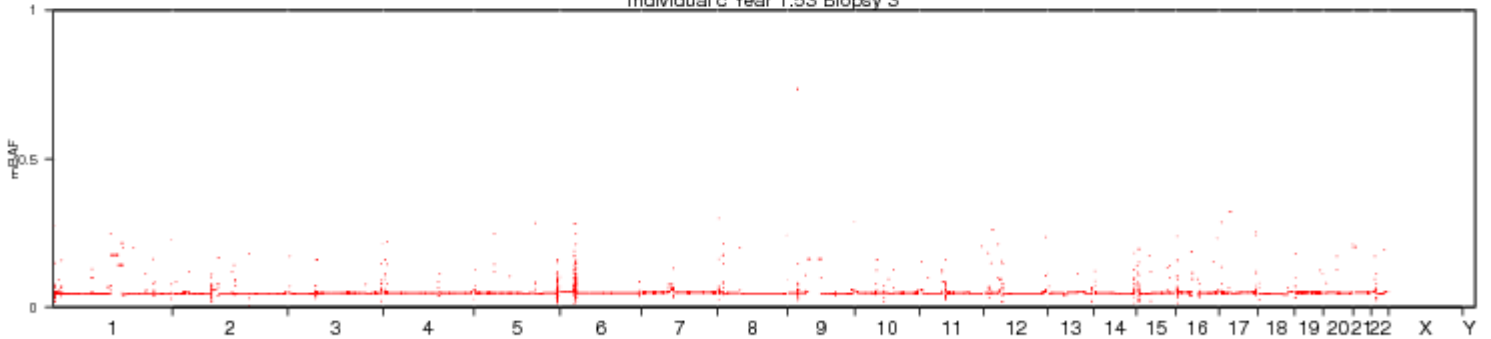

Individual c Year 1.53 Biopsy 3

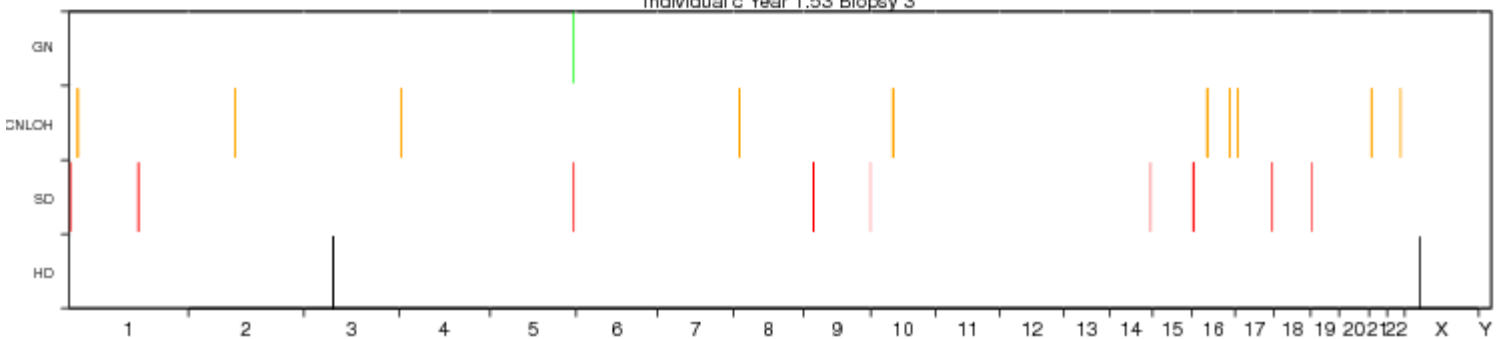



Individual c Year 1.53 Biopsy 4

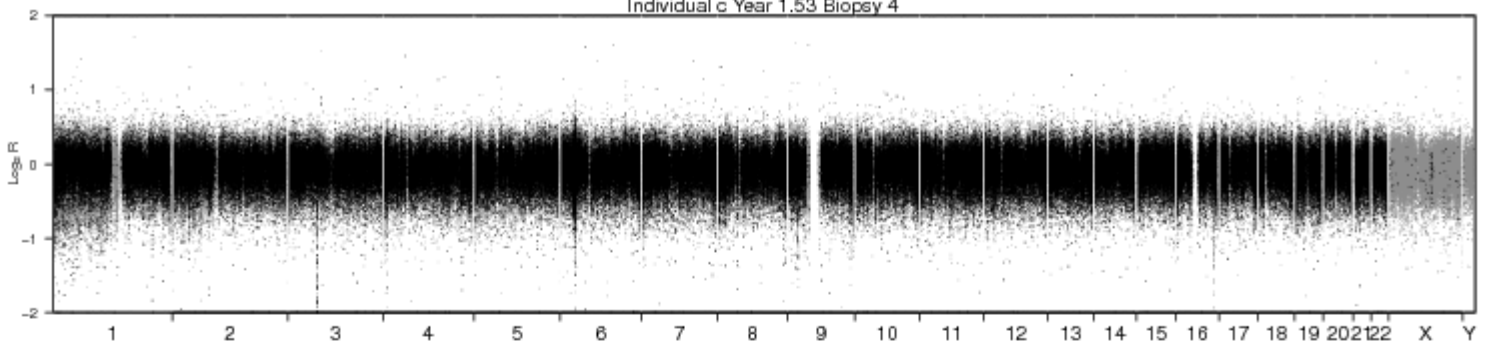

Individual c Year 1.53 Biopsy 4

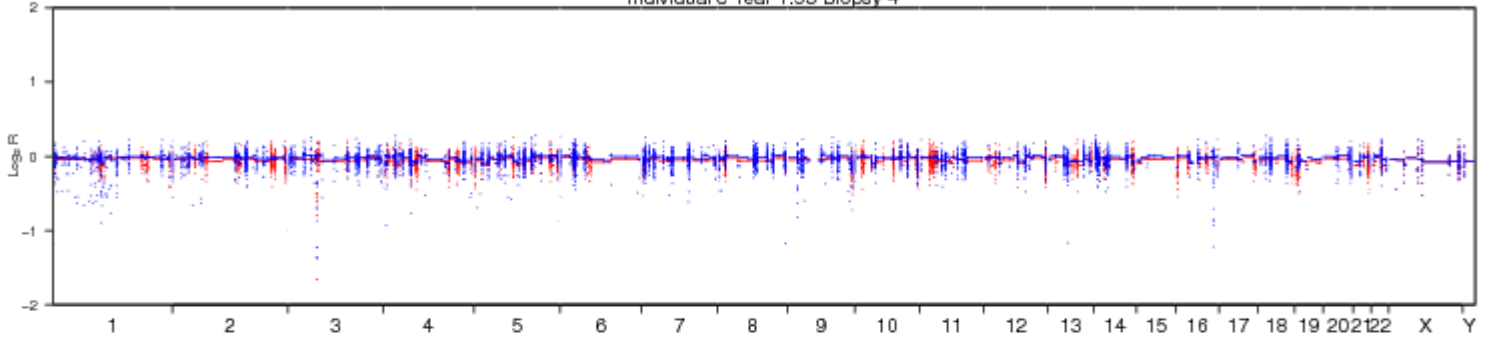

Individual c Year 1.53 Biopsy 4

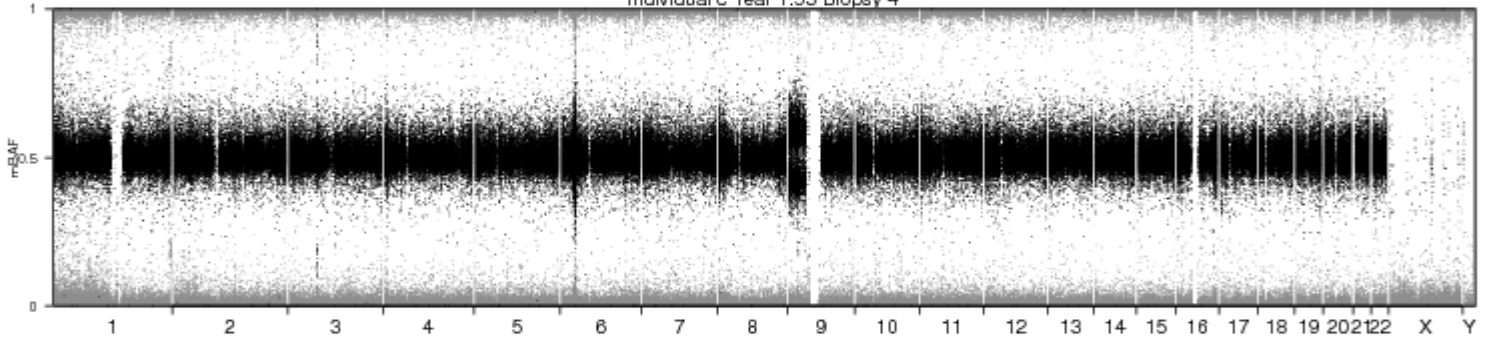

Individual c Year 1.53 Biopsy 4

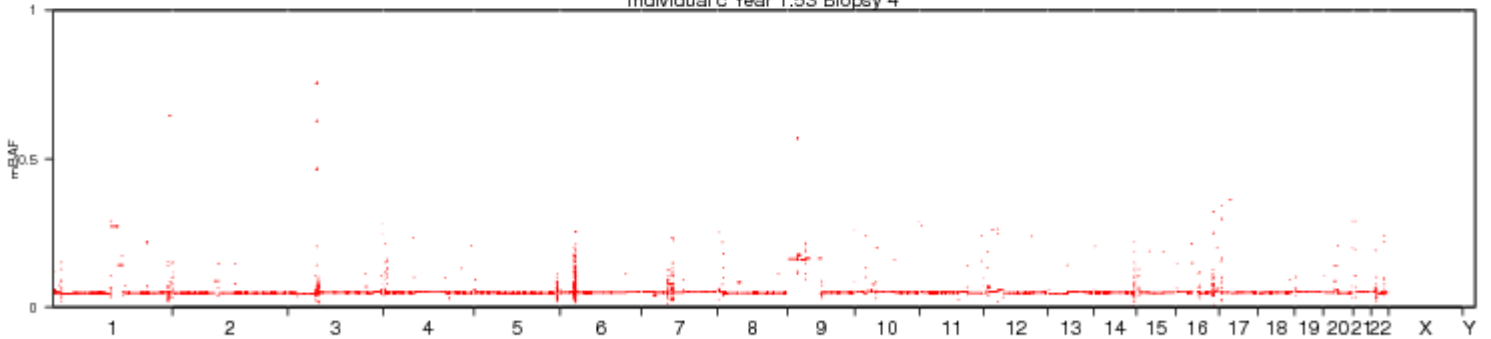

Individual c Year 1.53 Biopsy 4

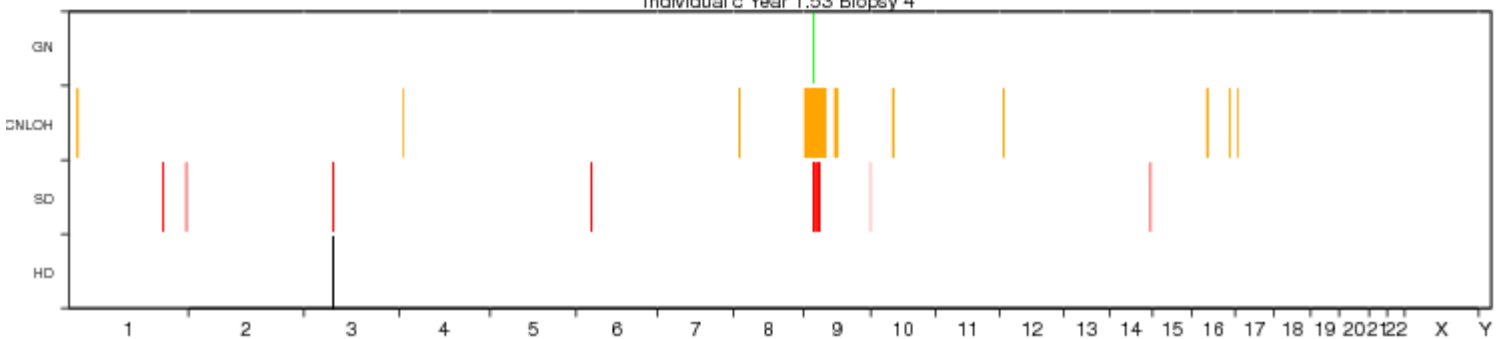

Individual c Year 3,21 Biopsy 5

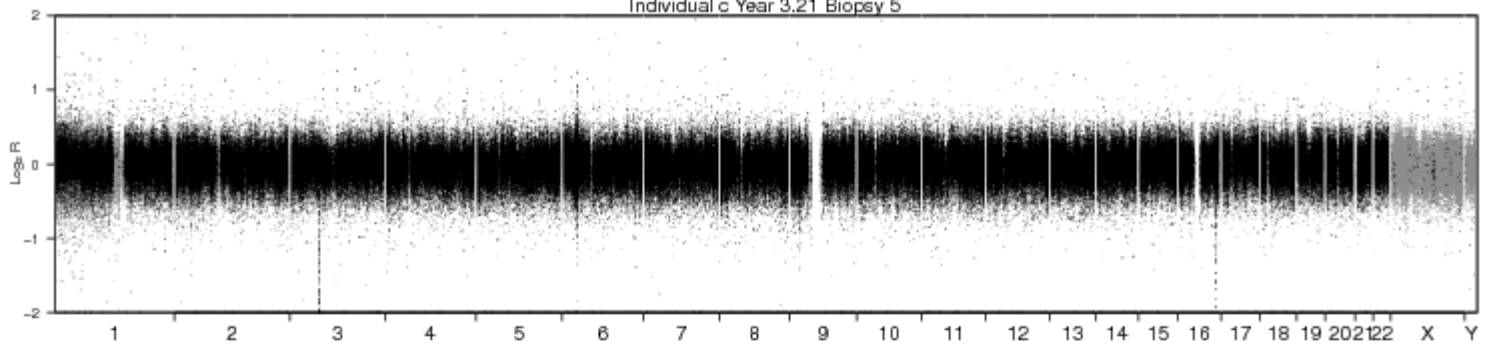

Individual c Year 3,21 Biopsy 5

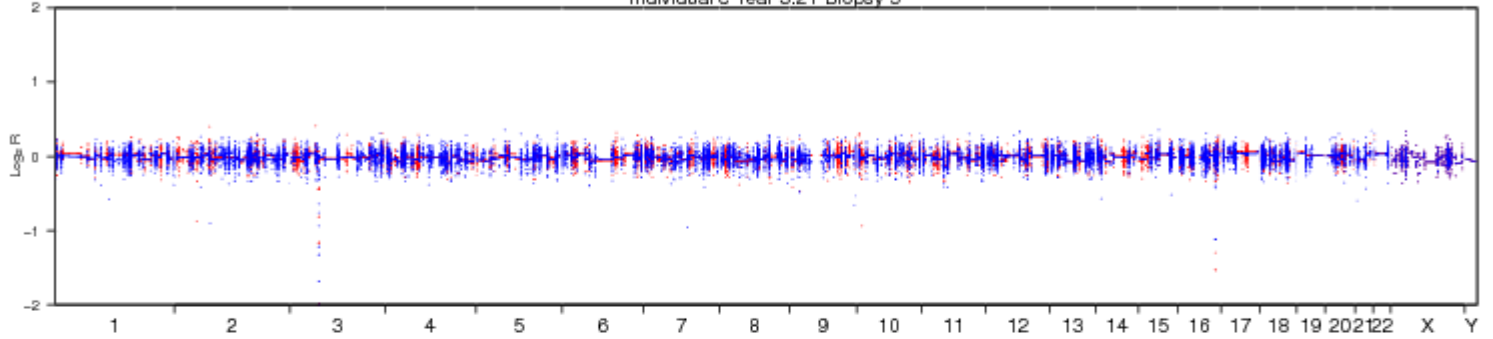

Individual c Year 3,21 Biopsy 5

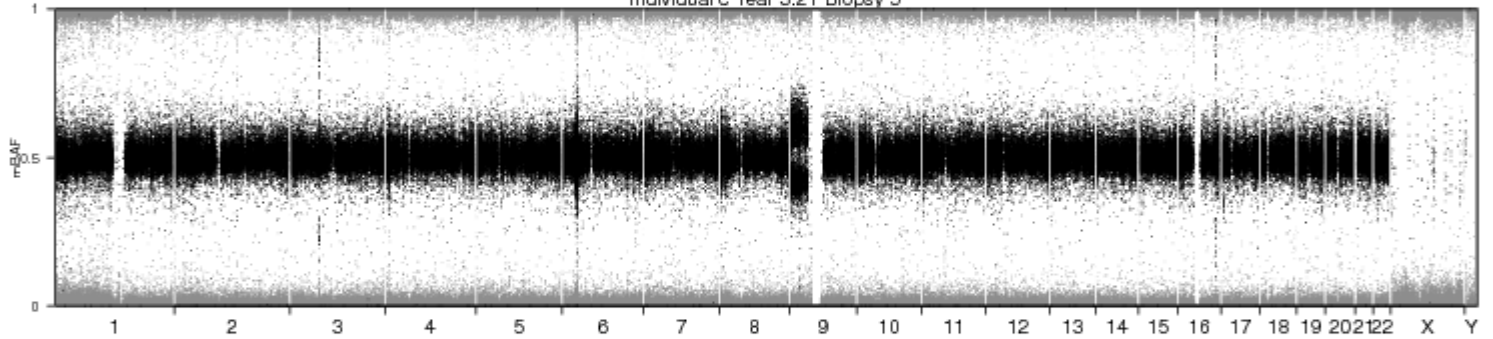

Individual c Year 3,21 Biopsy 5

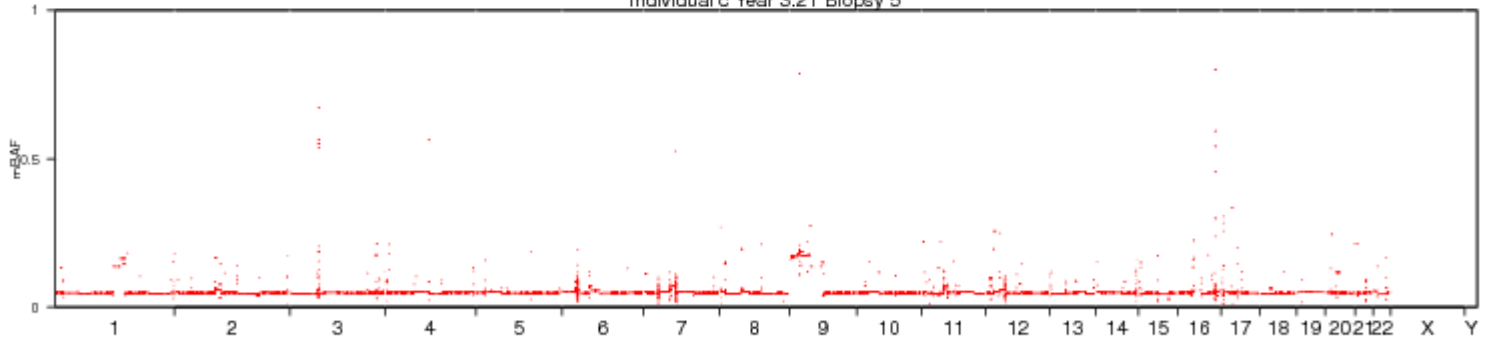

Individual c Year 3,21 Biopsy 5

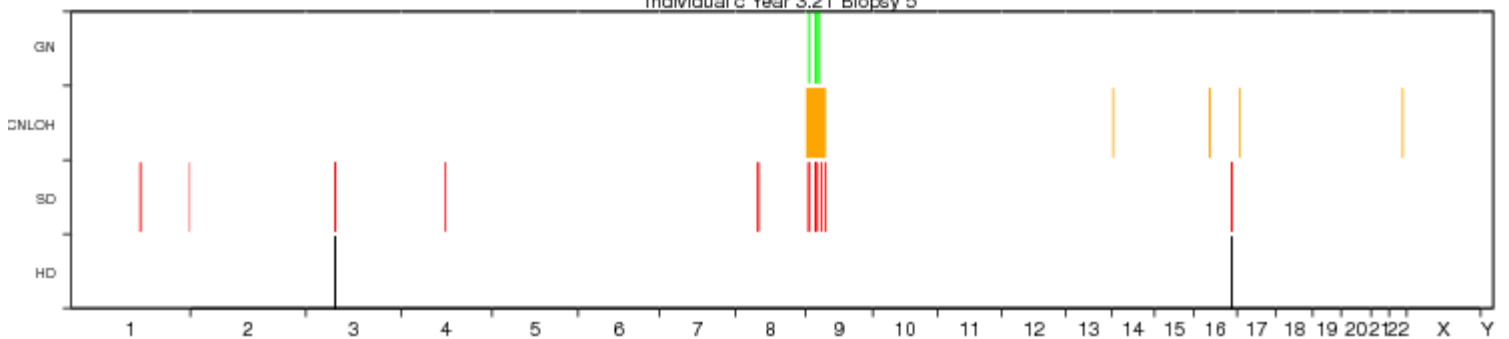

Individual c Year 3.21 Biopsy 6

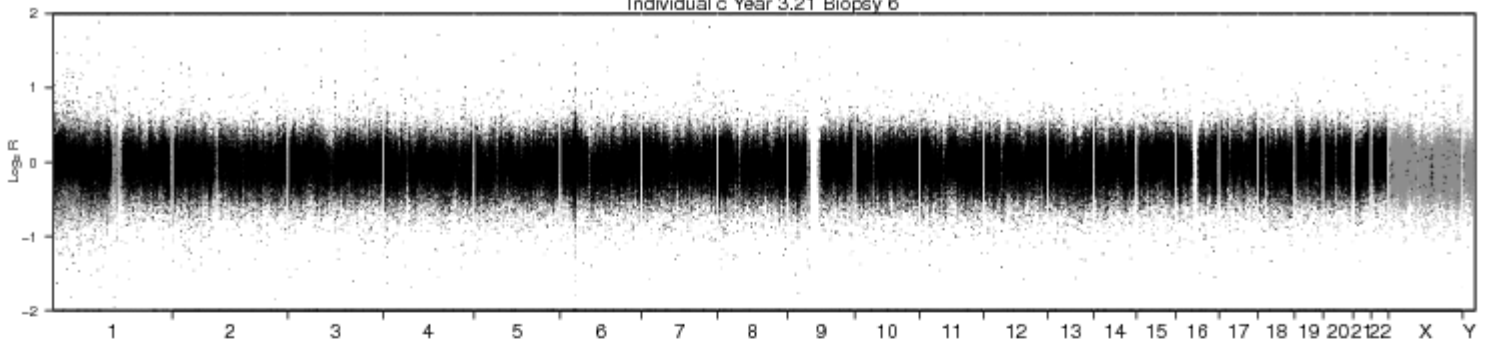

Individual c Year 3.21 Biopsy 6

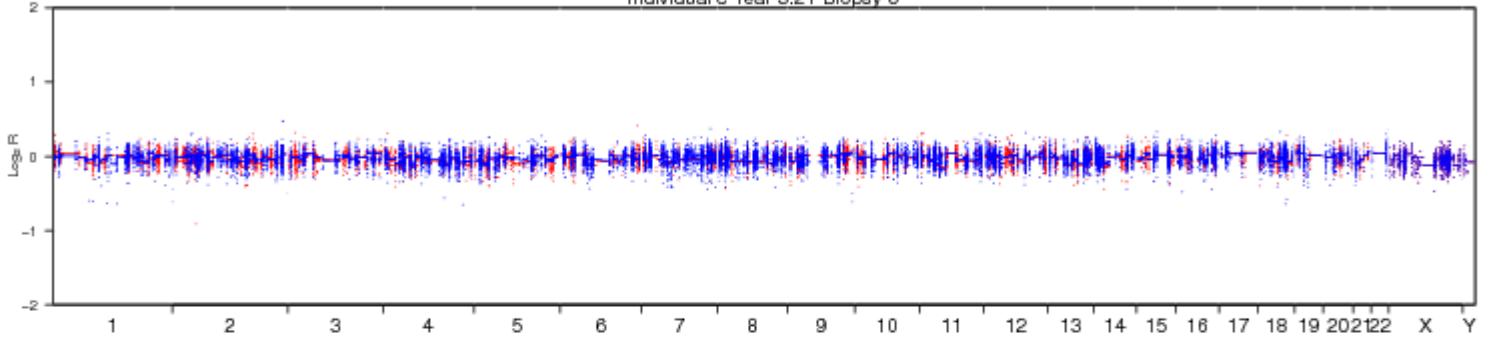

Individual c Year 3.21 Biopsy 6

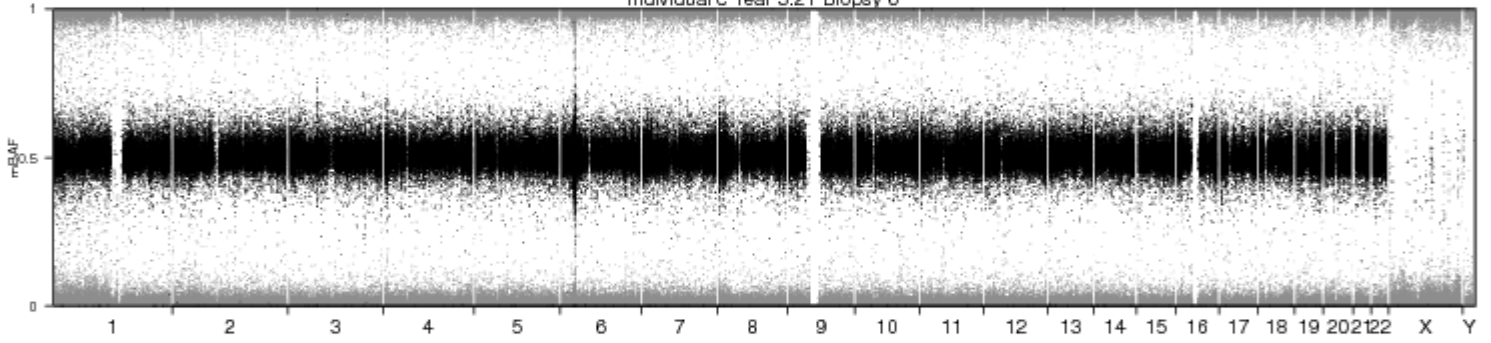

Individual c Year 3.21 Biopsy 6

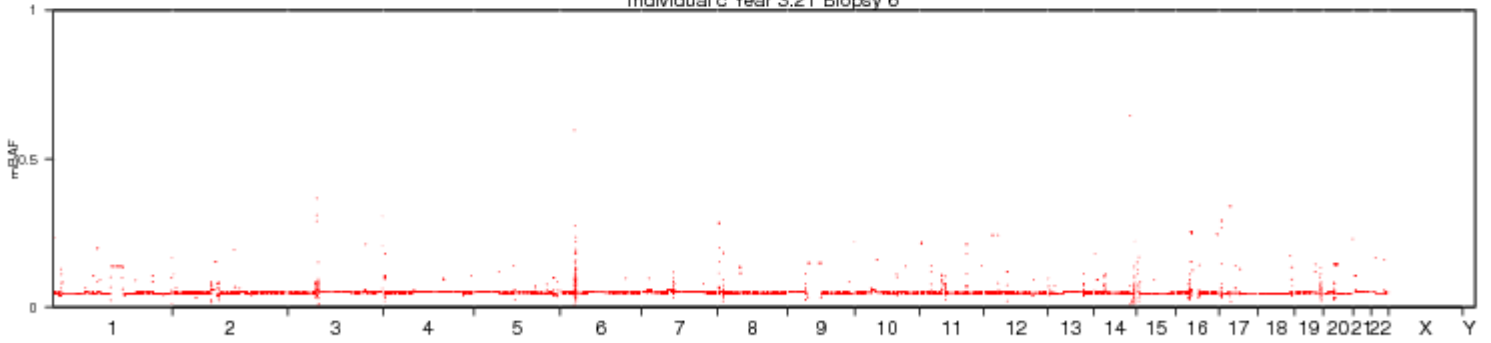

Individual c Year 3.21 Biopsy 6

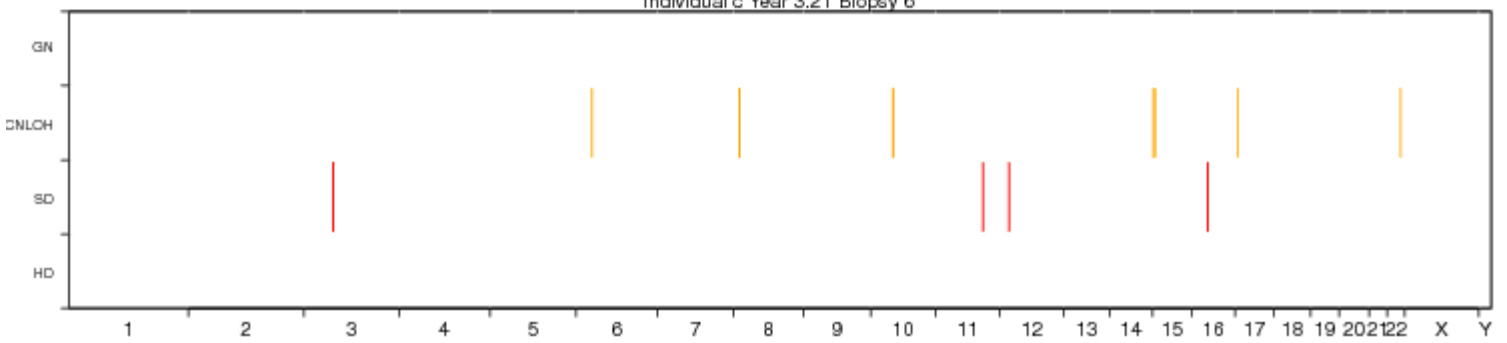

Individual c Year 7.15 Biopsy 7

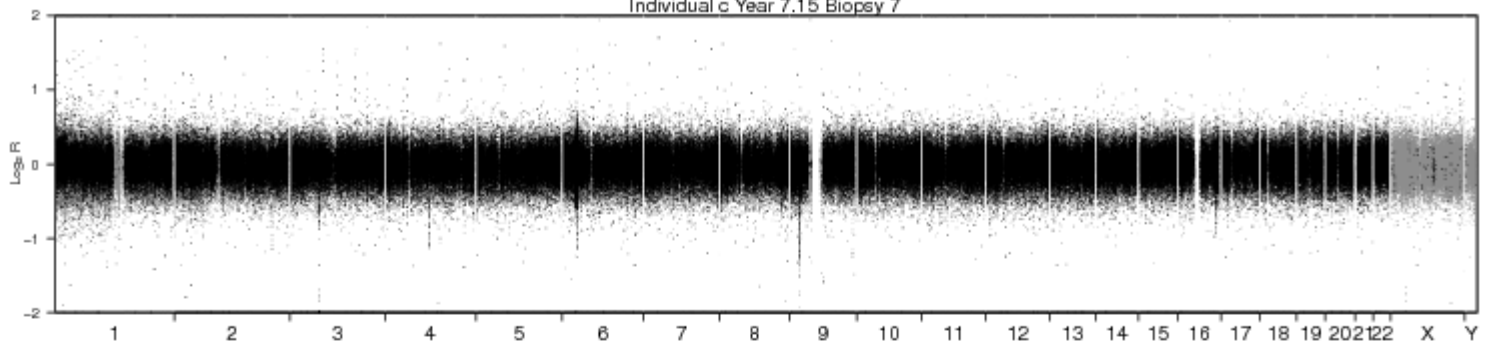

Individual c Year 7.15 Biopsy 7

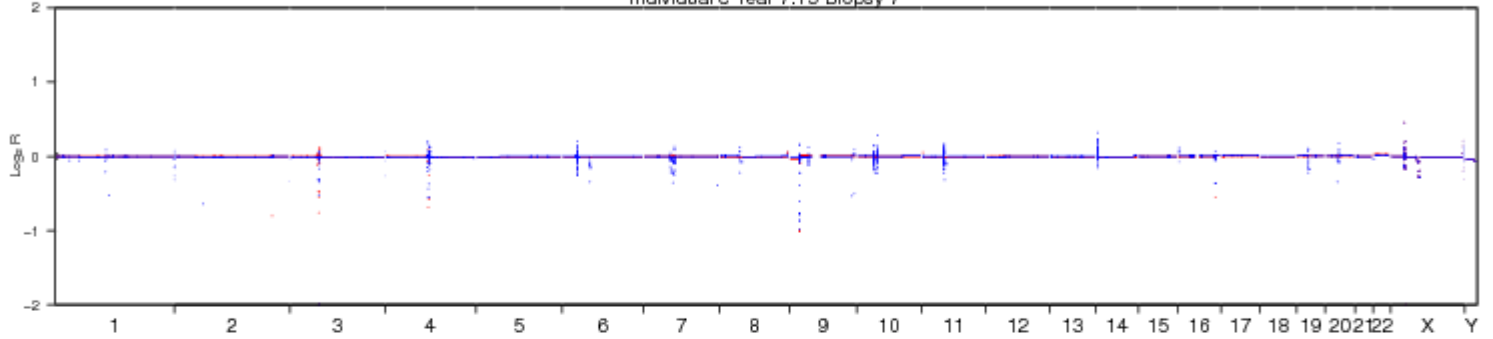

Individual c Year 7.15 Biopsy 7

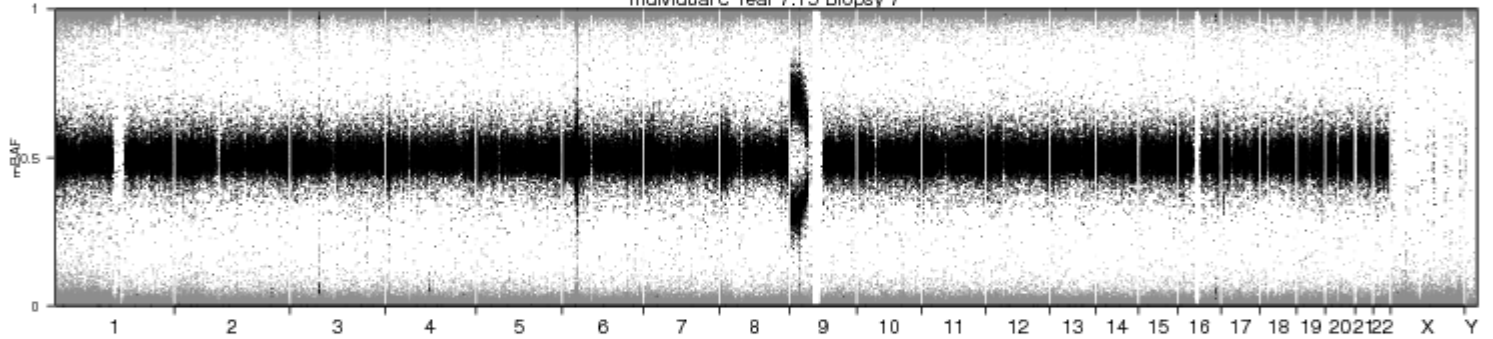

Individual c Year 7.15 Biopsy 7

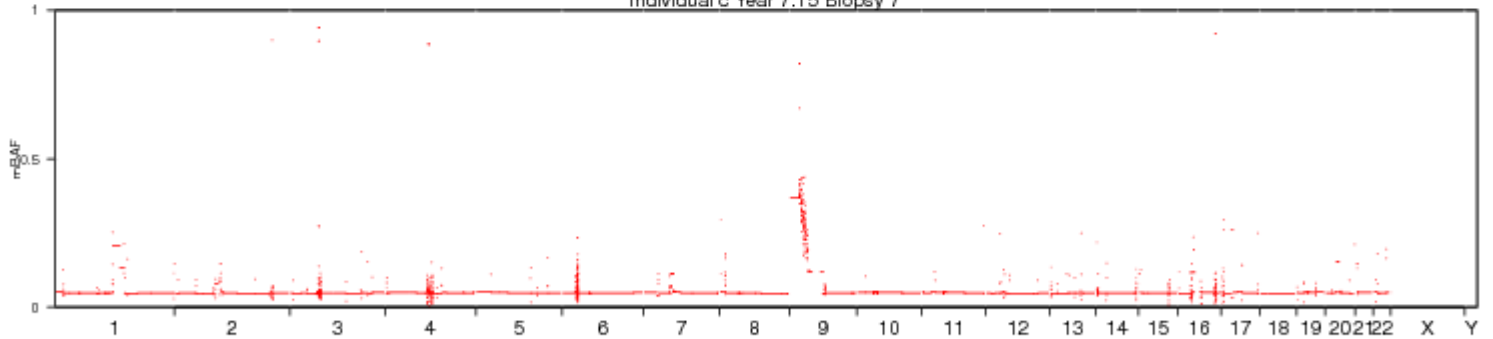

Individual c Year 7.15 Biopsy 7

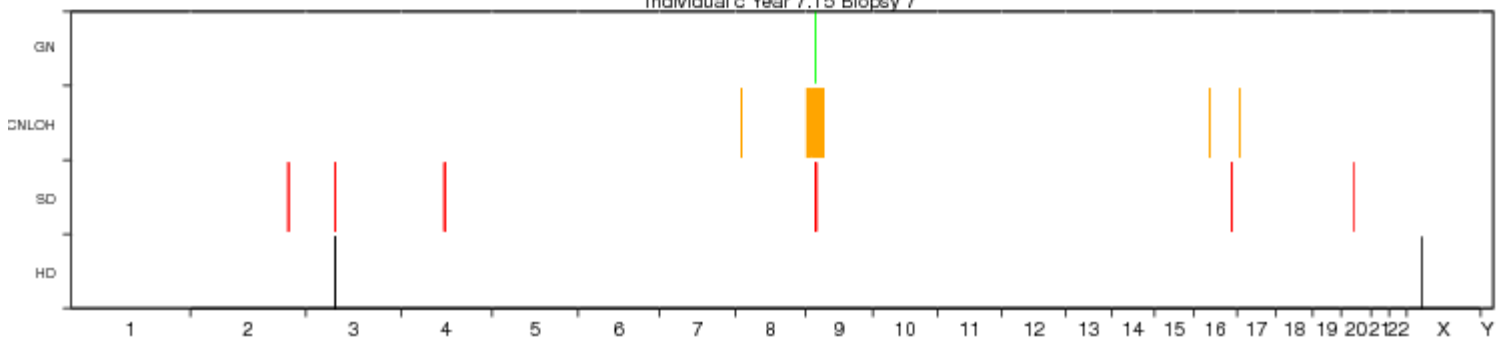



Individual c Year 7.15 Biopsy 8

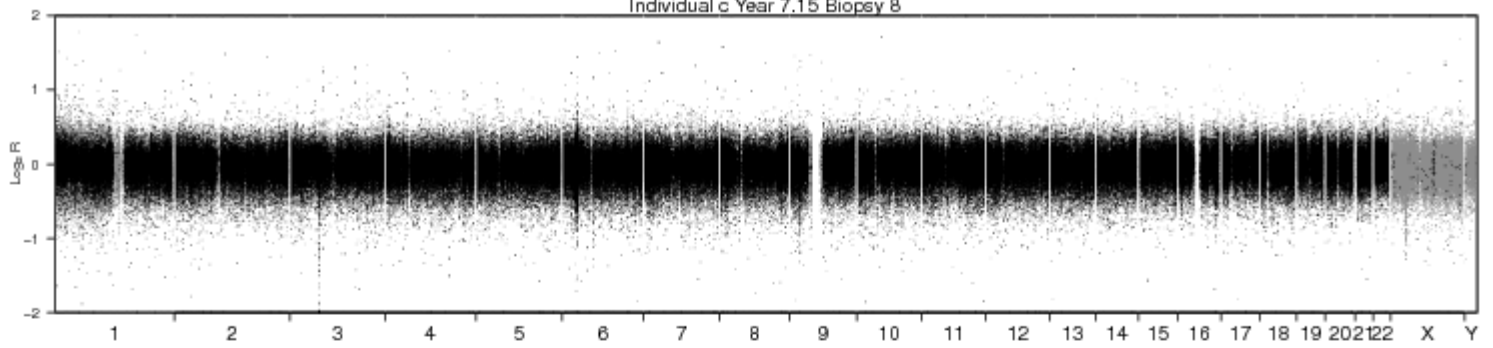

Individual c Year 7.15 Biopsy 8

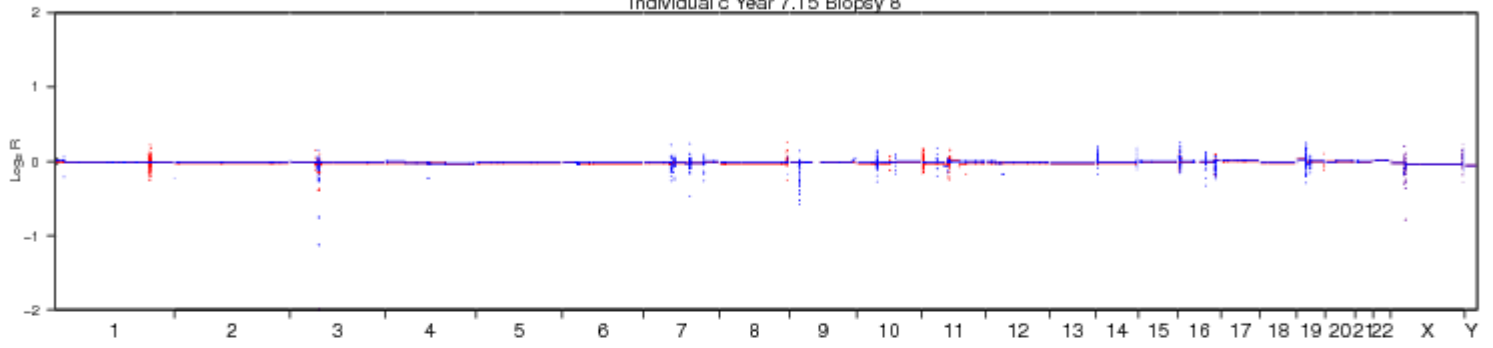

Individual c Year 7.15 Biopsy 8

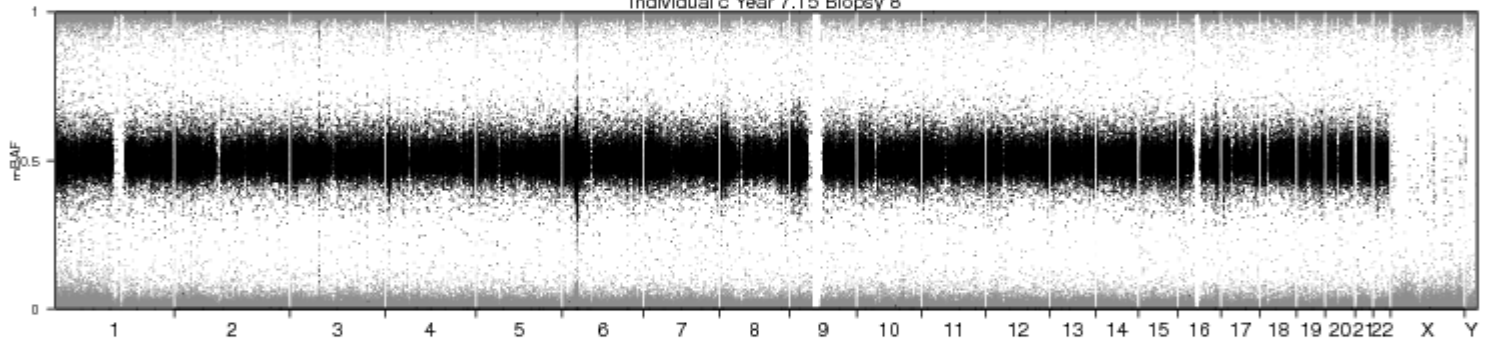

Individual c Year 7.15 Biopsy 8

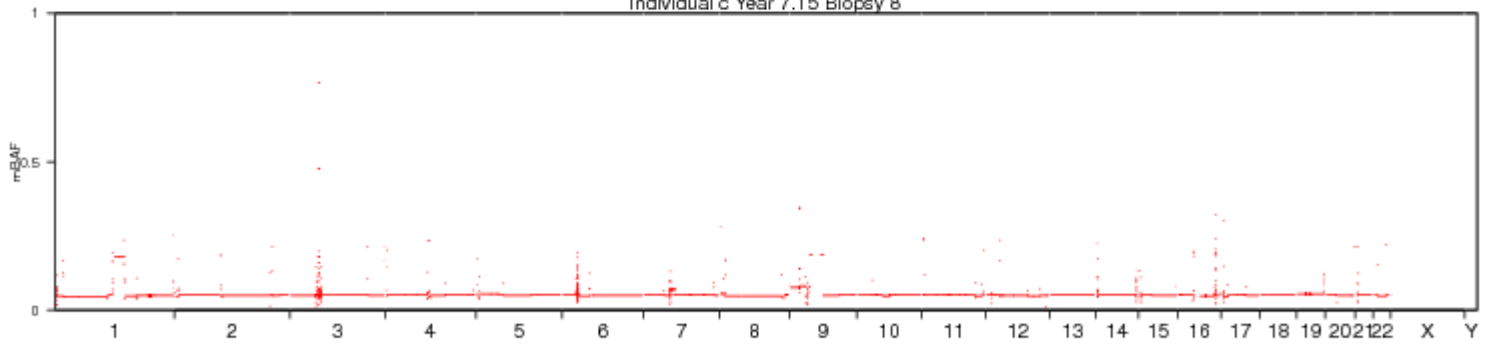

Individual c Year 7.15 Biopsy 8

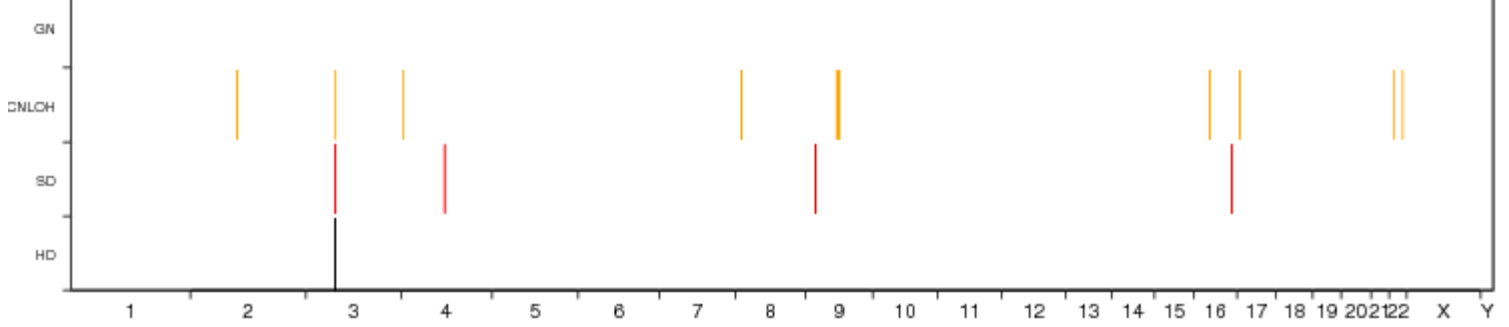



Individual c Year 9.7 Biopsy 9

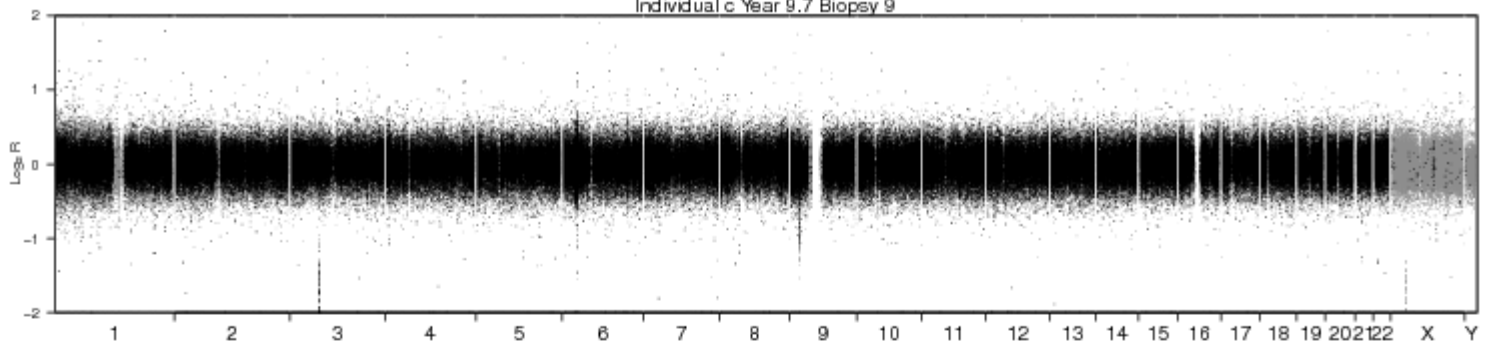

Individual c Year 9.7 Biopsy 9

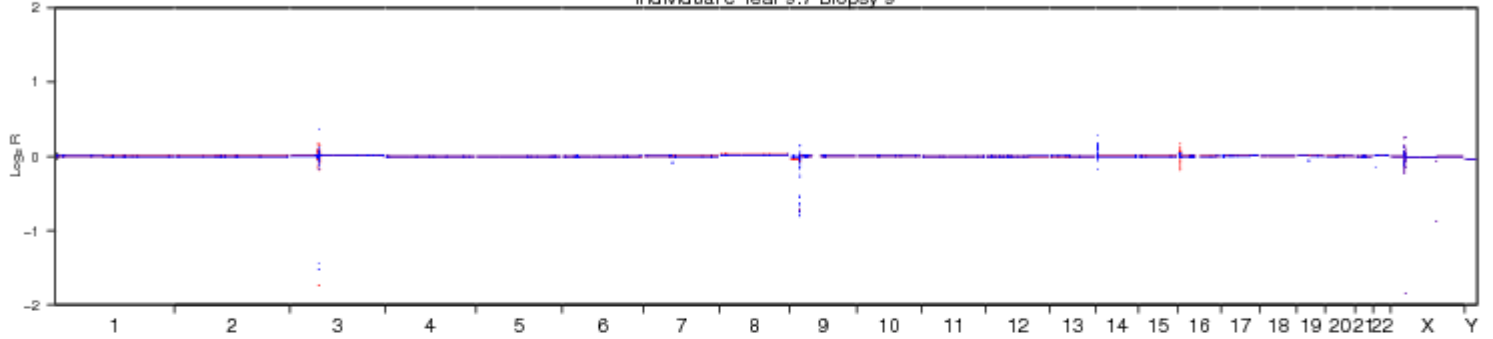

Individual c Year 9.7 Biopsy 9

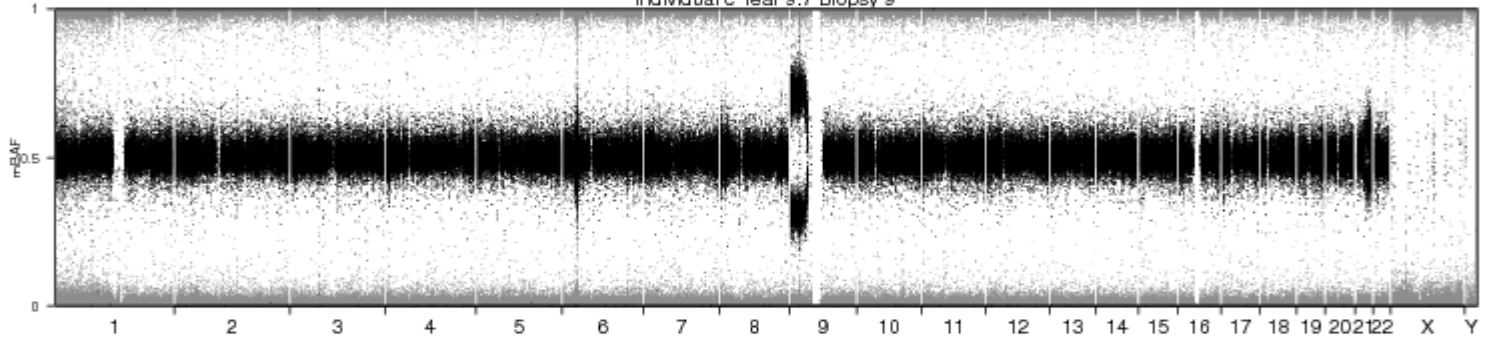

Individual c Year 9.7 Biopsy 9

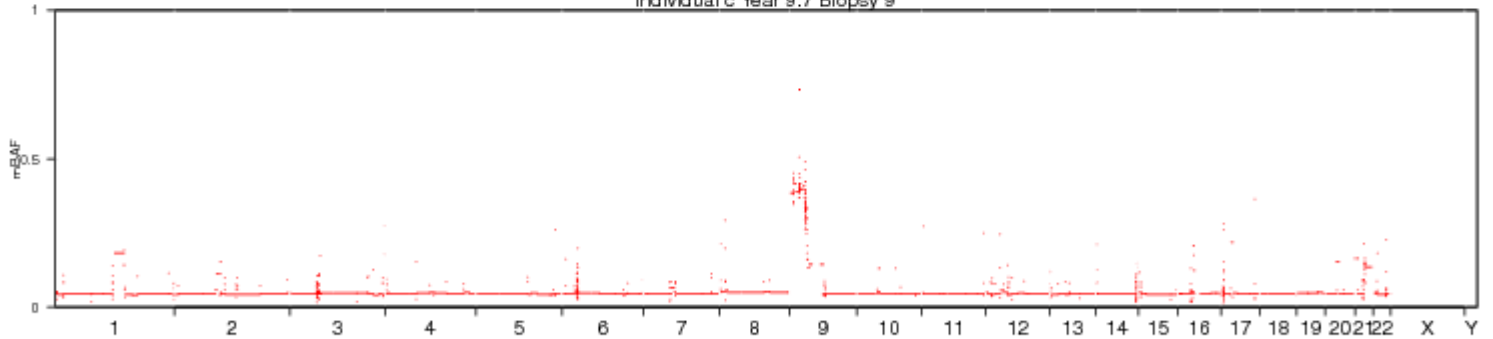

Individual c Year 9.7 Biopsy 9

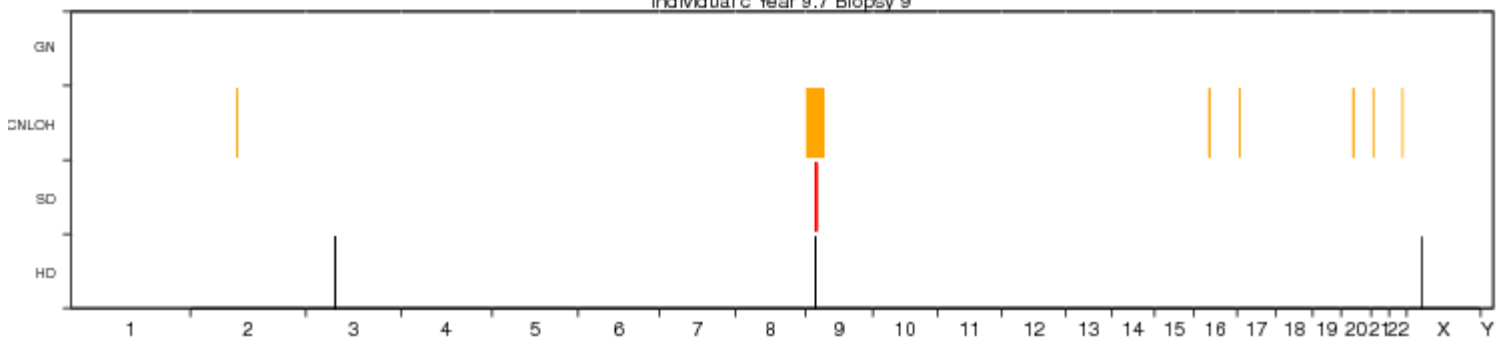

Individual c Year 9.7 Biopsy 10

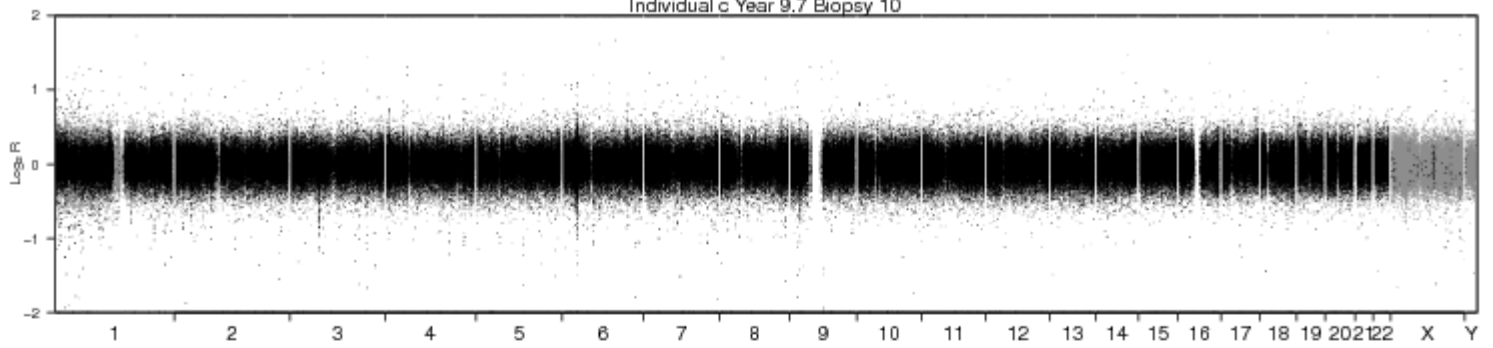

Individual c Year 9.7 Biopsy 10

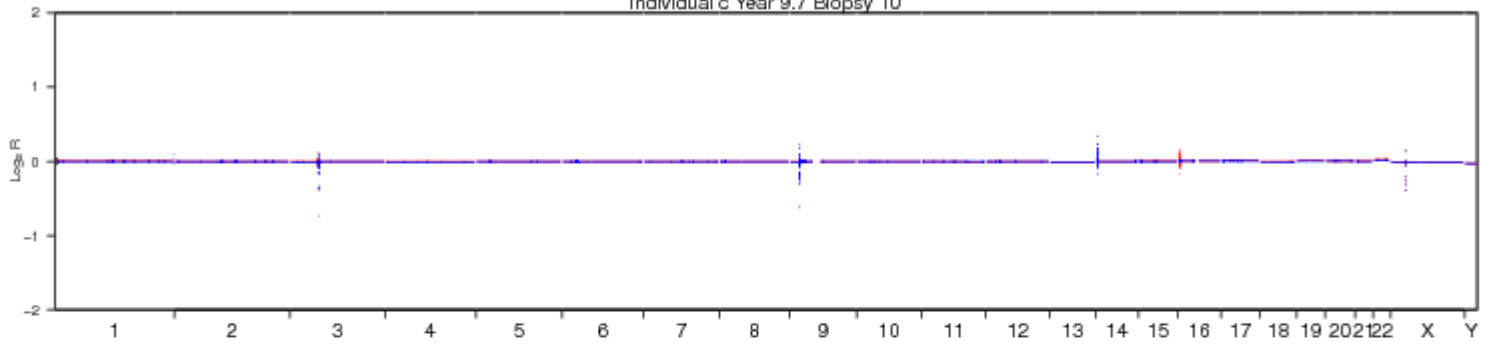

Individual c Year 9.7 Biopsy 10

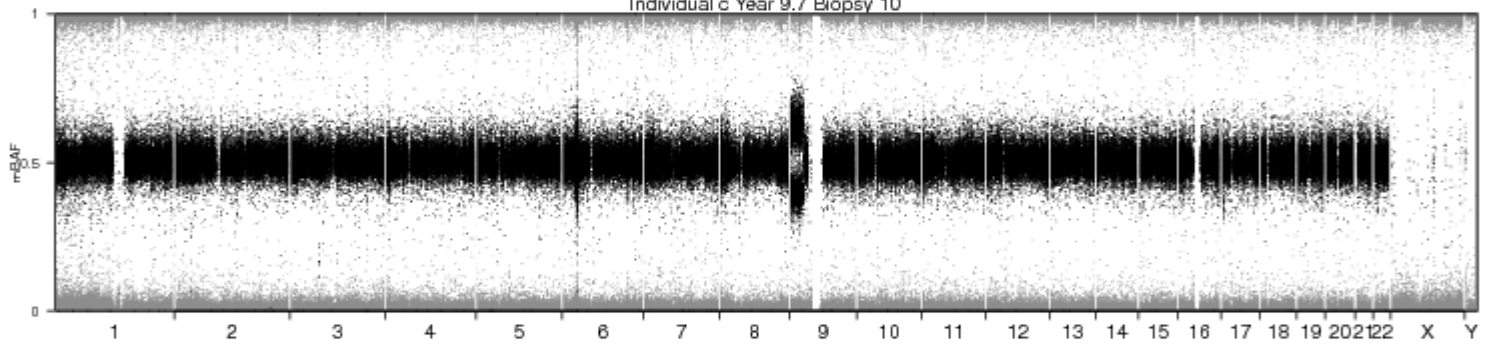

Individual c Year 9.7 Biopsy 10

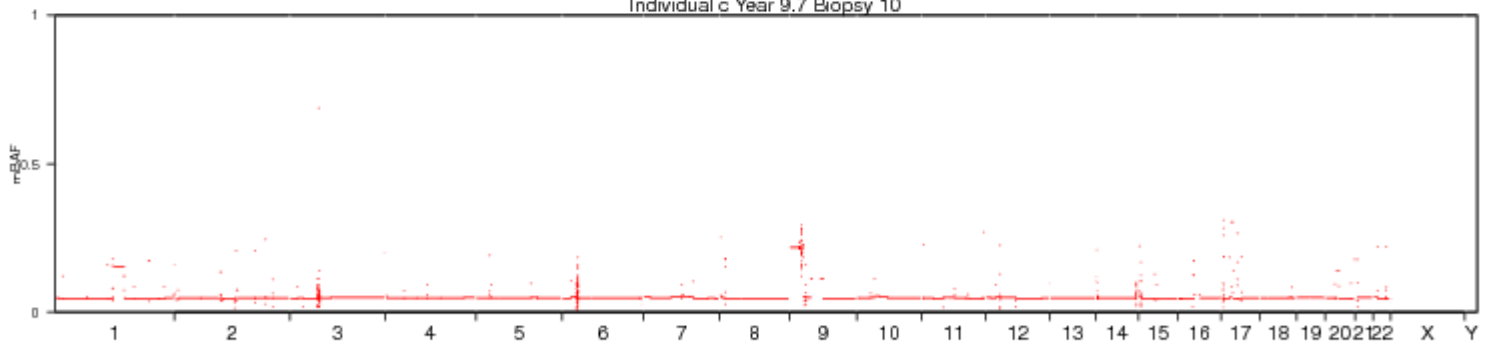

Individual c Year 9.7 Biopsy 10

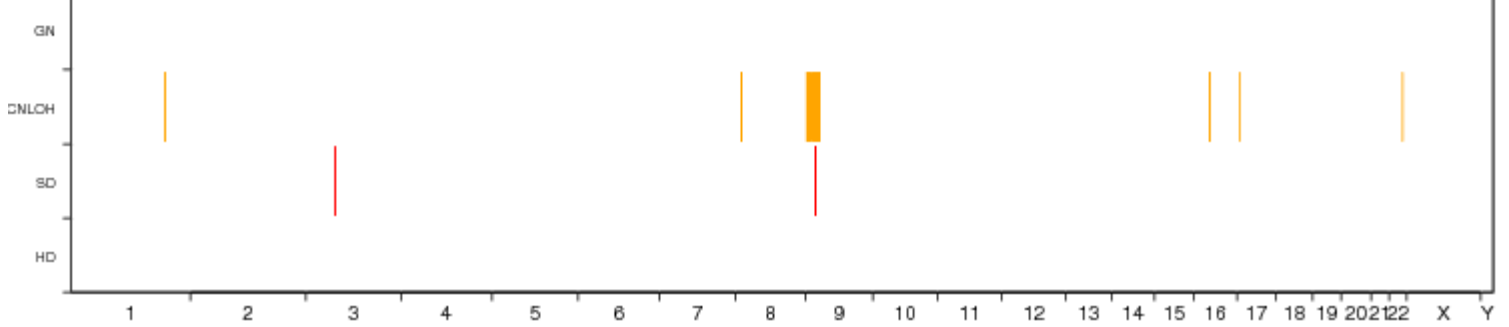

Individual c Year 11.69 Biopsy 11

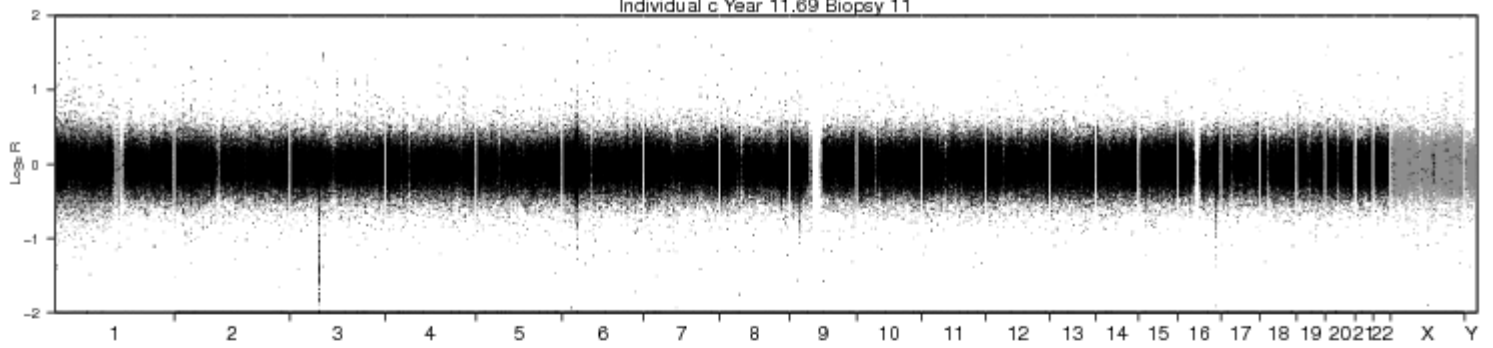

Individual c Year 11.69 Biopsy 11

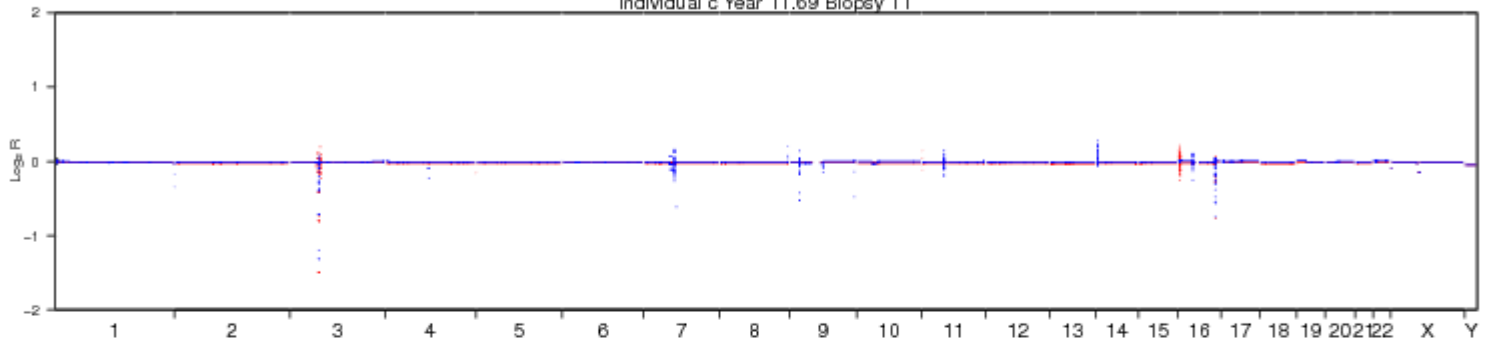

Individual c Year 11.69 Biopsy 11

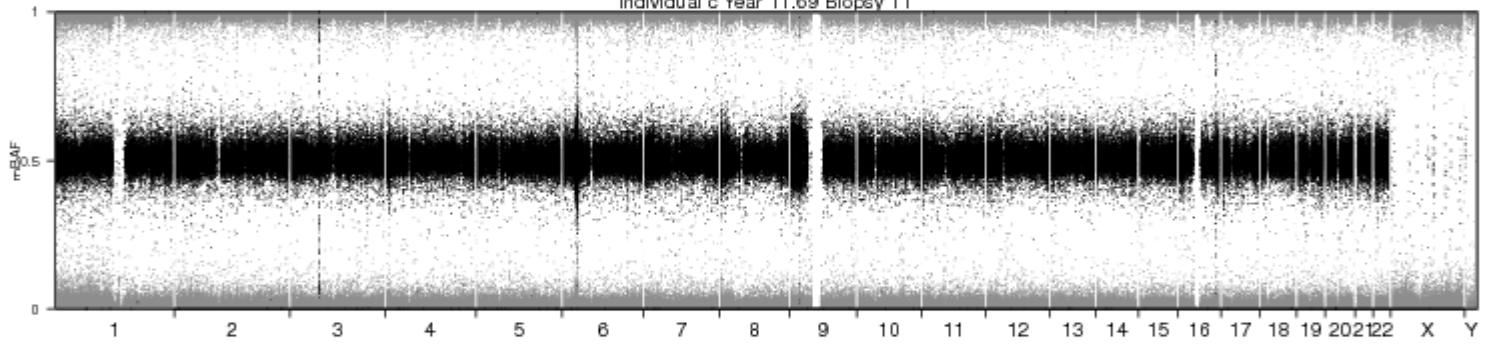

Individual c Year 11.69 Biopsy 11

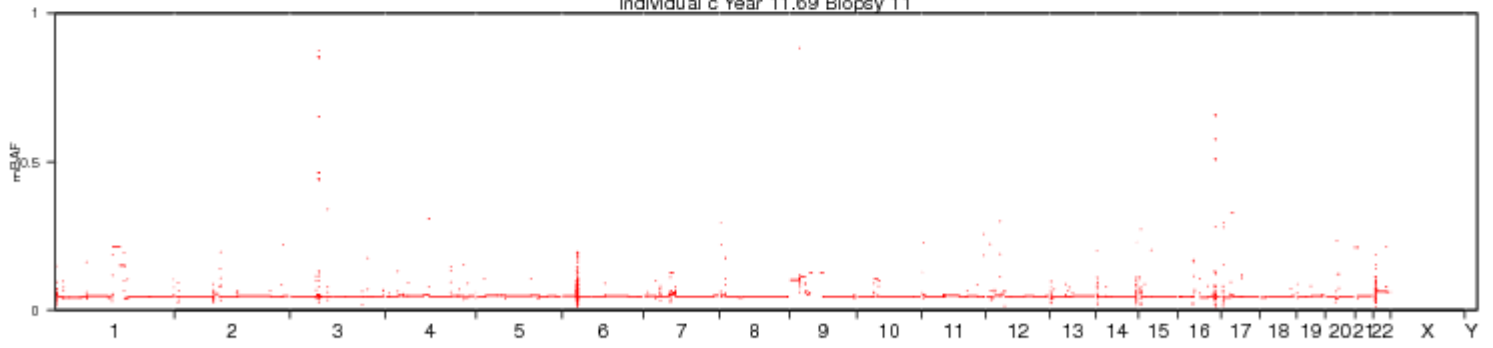

Individual c Year 11.69 Biopsy 11

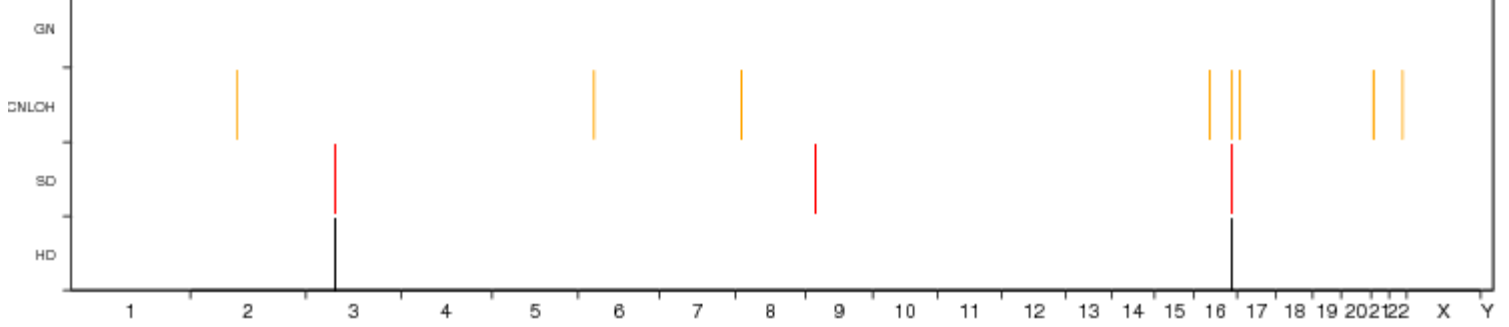

Individual c Year 11.69 Biopsy 12

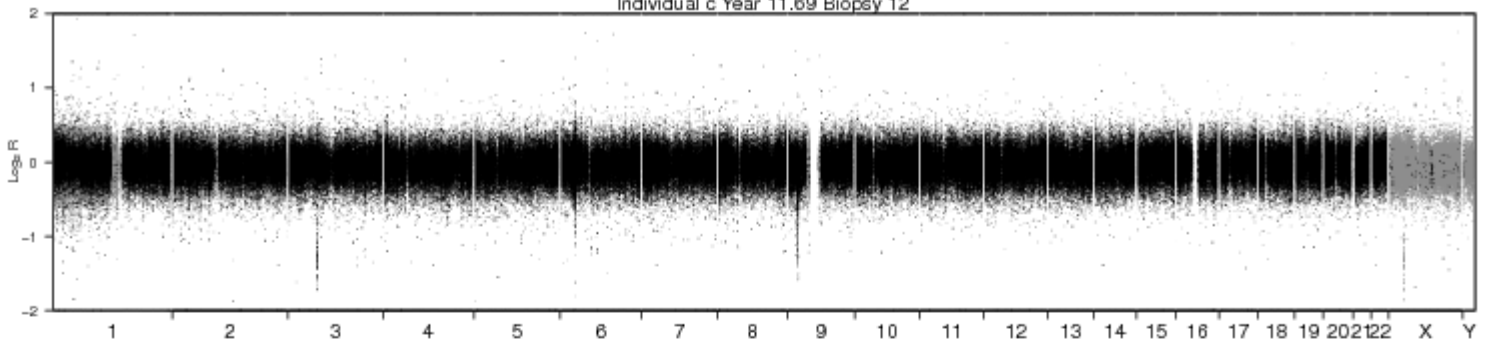

Individual c Year 11.69 Biopsy 12

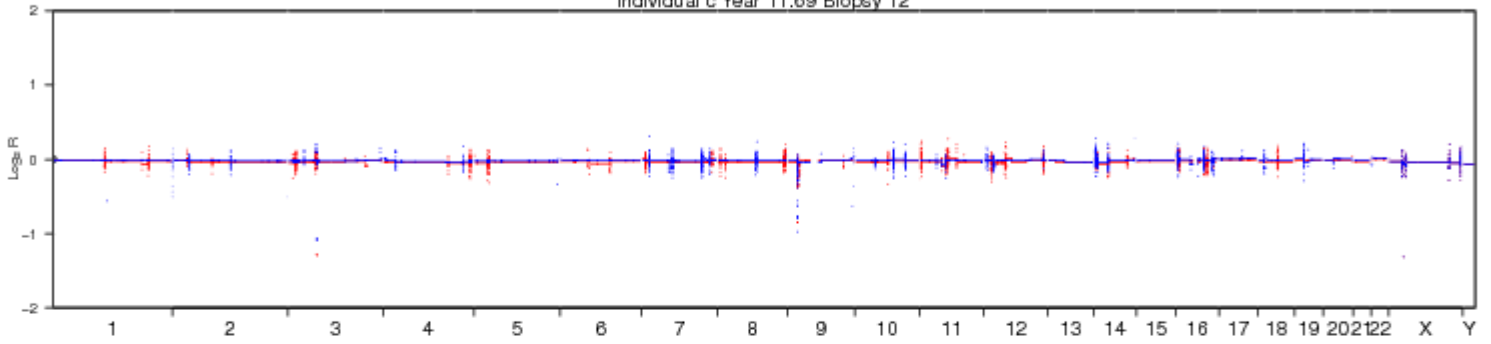

Individual c Year 11.69 Biopsy 12

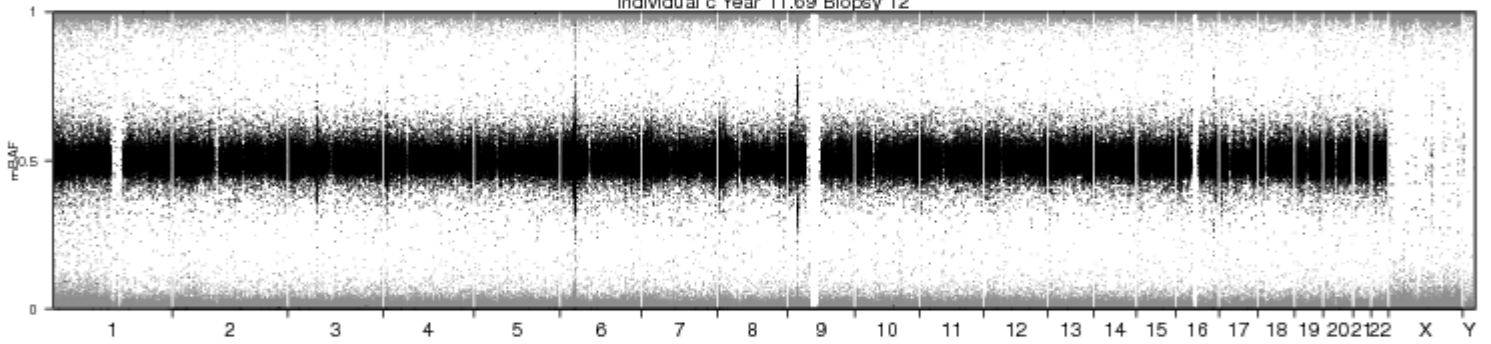

Individual c Year 11.69 Biopsy 12

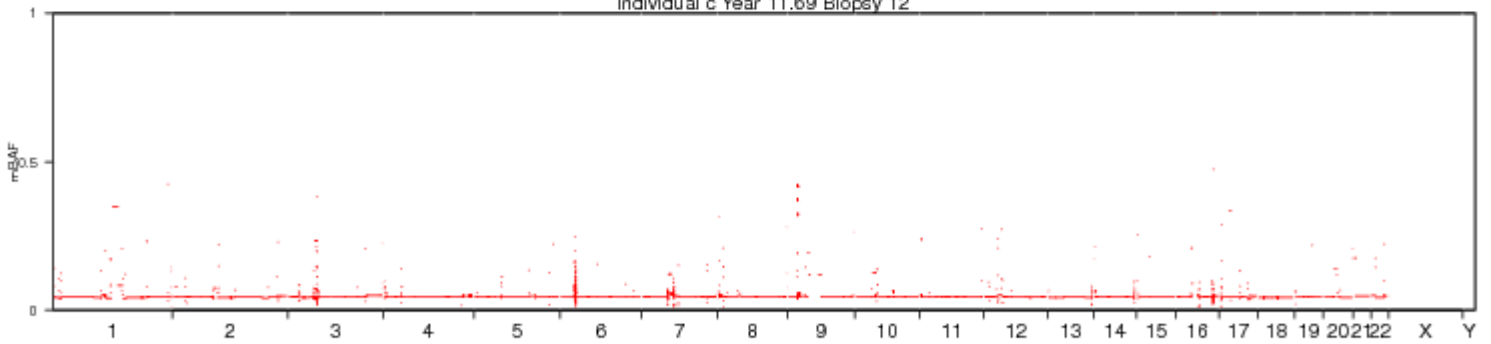

Individual c Year 11.69 Biopsy 12

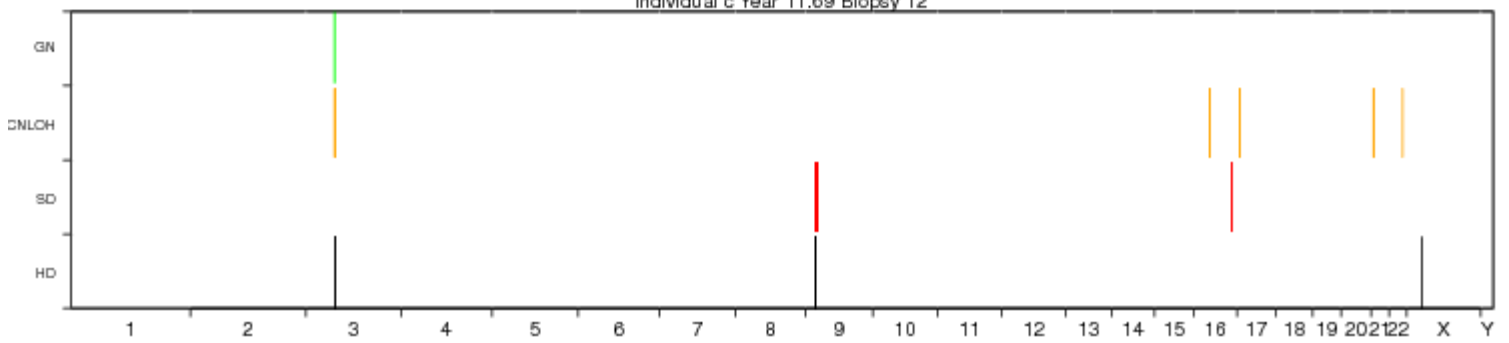

Individual d Year 0 Biopsy 1

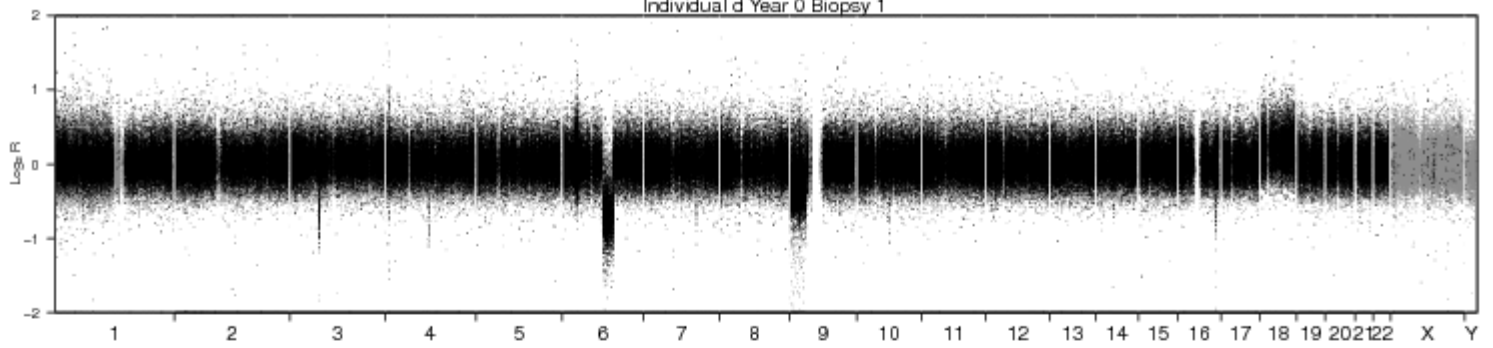

Individual d Year 0 Biopsy 1

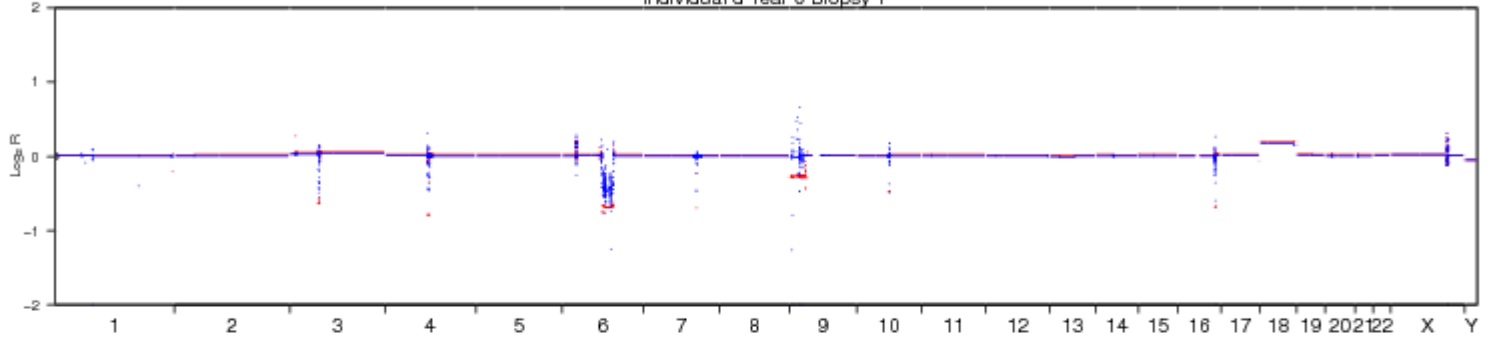

Individual d Year 0 Biopsy 1

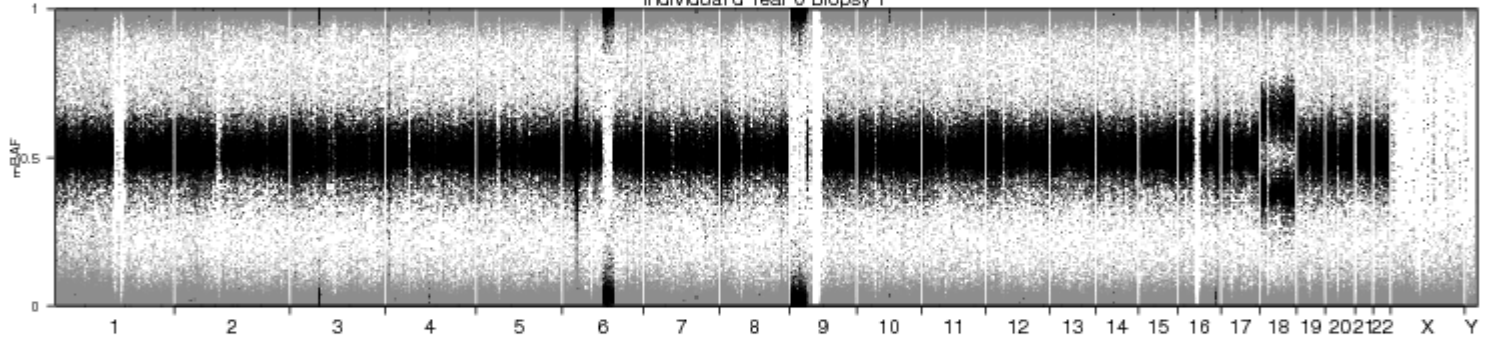

Individual d Year 0 Biopsy 1

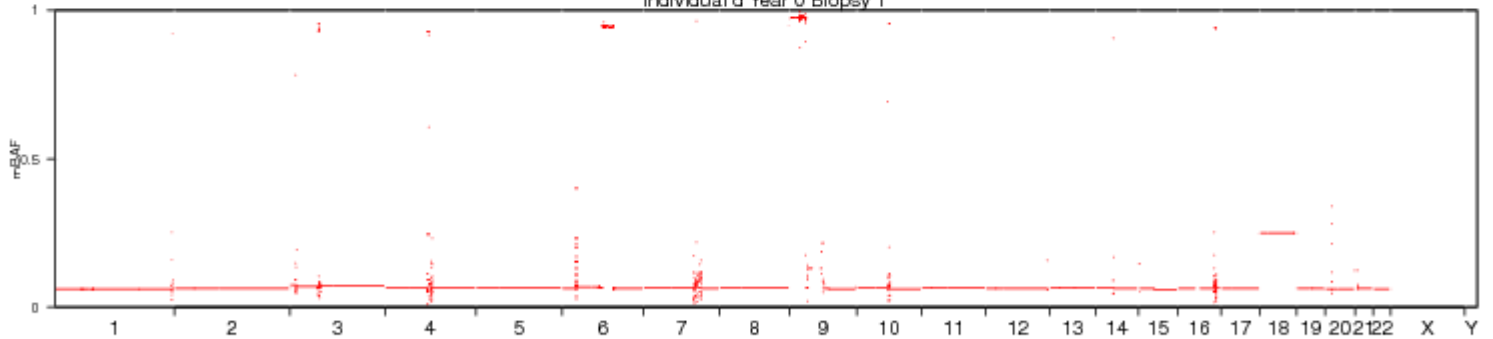

Individual d Year 0 Biopsy 1

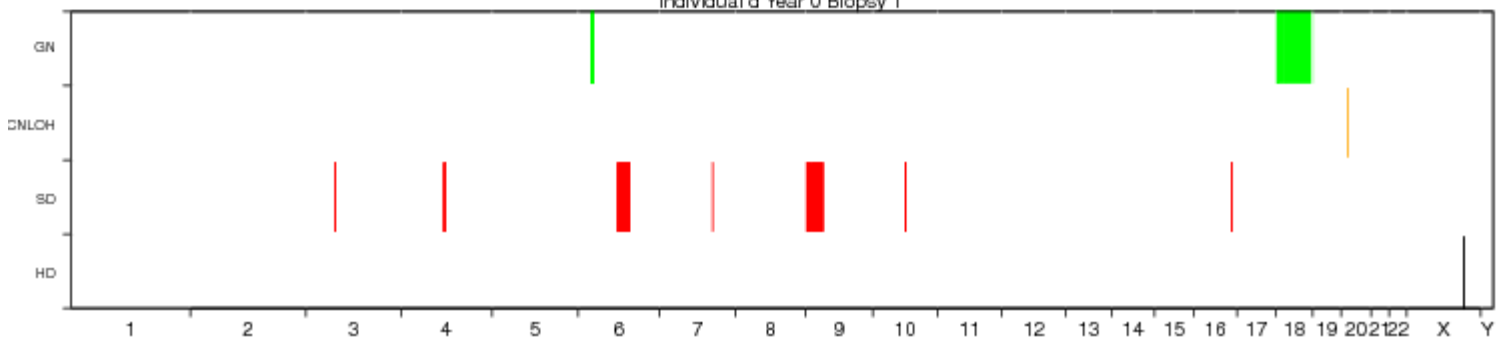



Individual d Year 0 Biopsy 2

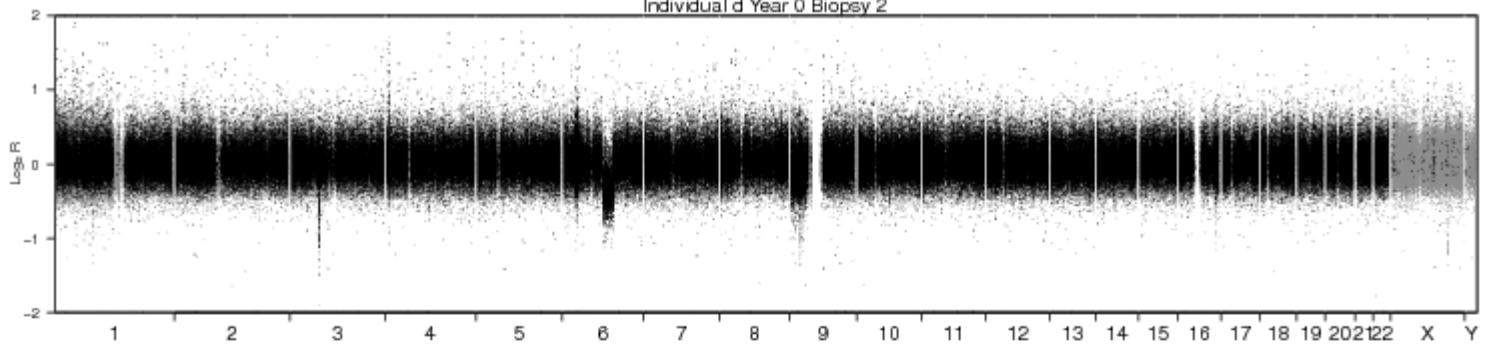

Individual d Year 0 Biopsy 2

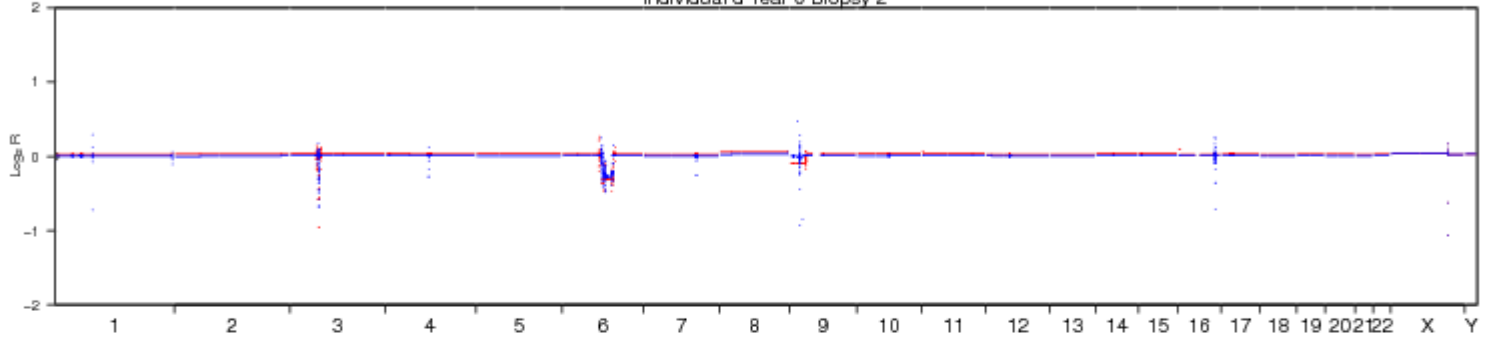

Individual d Year 0 Biopsy 2

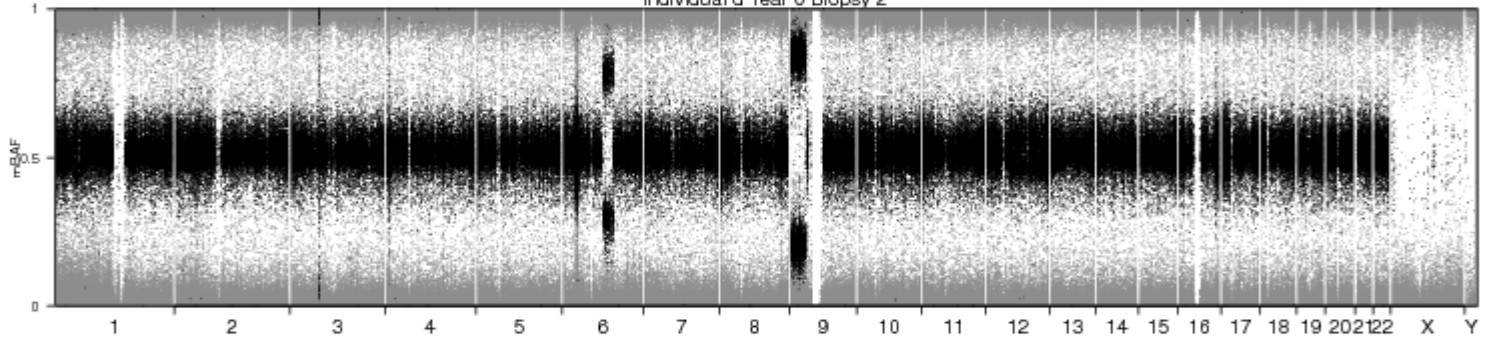

Individual d Year 0 Biopsy 2

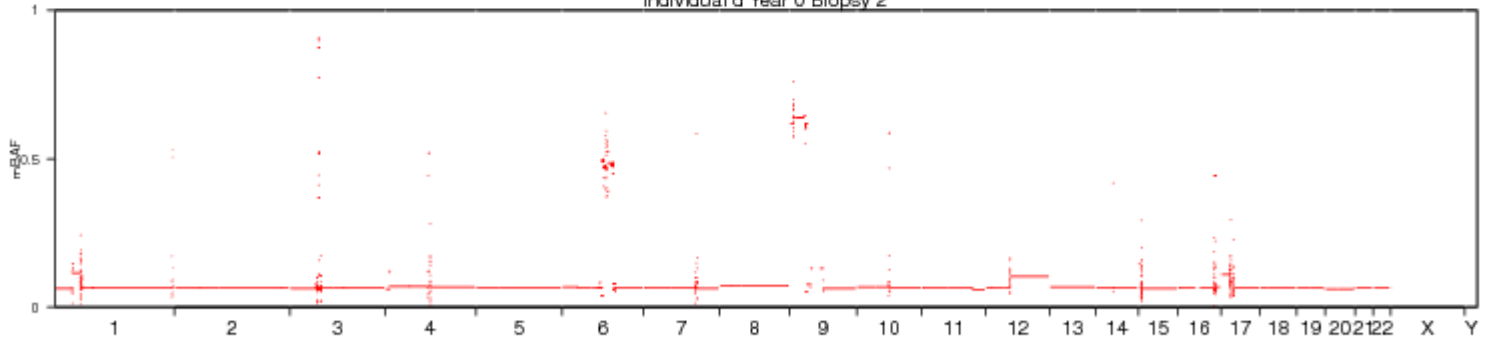

Individual d Year 0 Biopsy 2

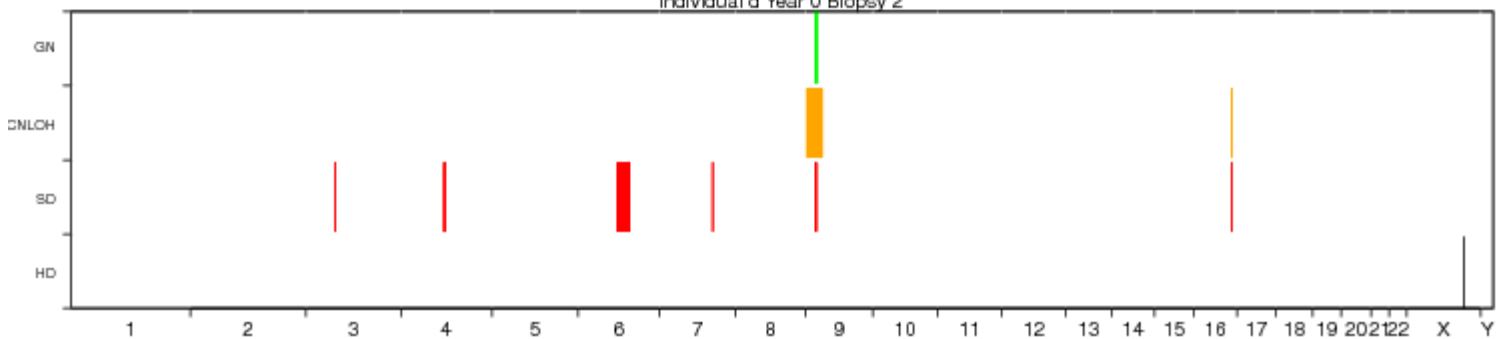

Individual d Year 2.61 Biopsy 3

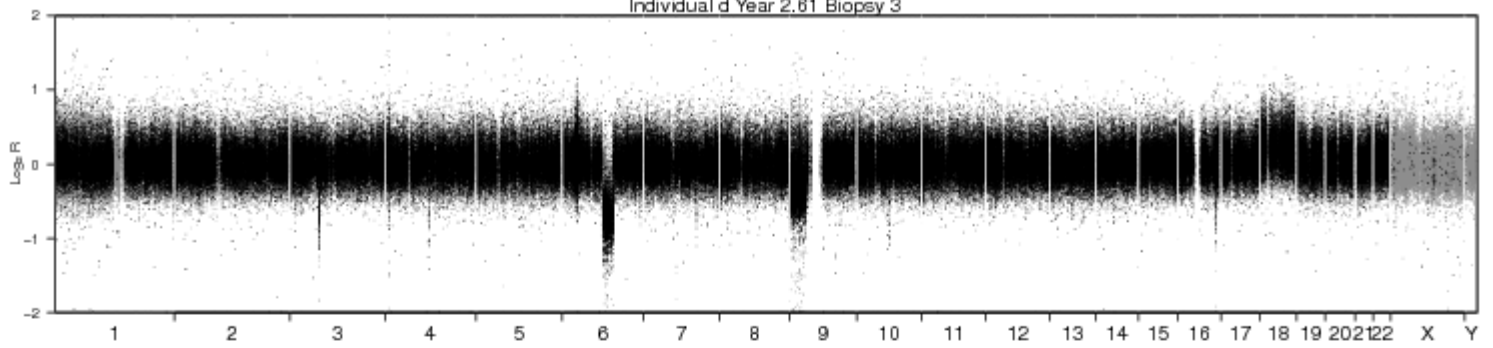

Individual d Year 2.61 Biopsy 3

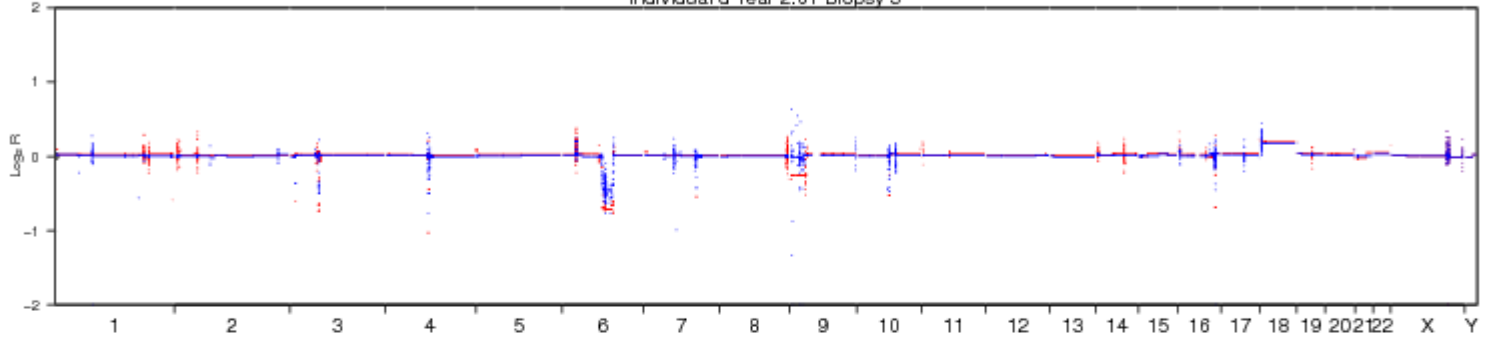

Individual d Year 2.61 Biopsy 3

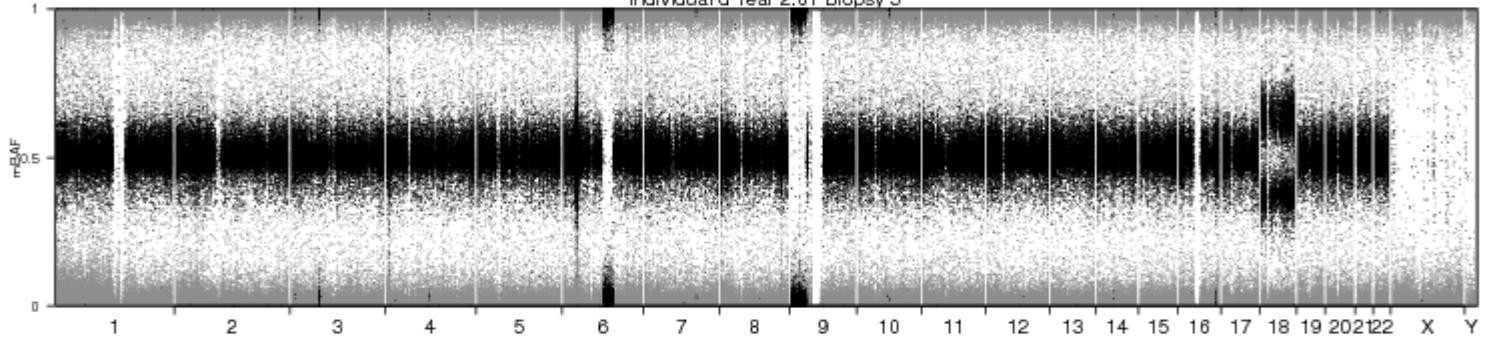

Individual d Year 2.61 Biopsy 3

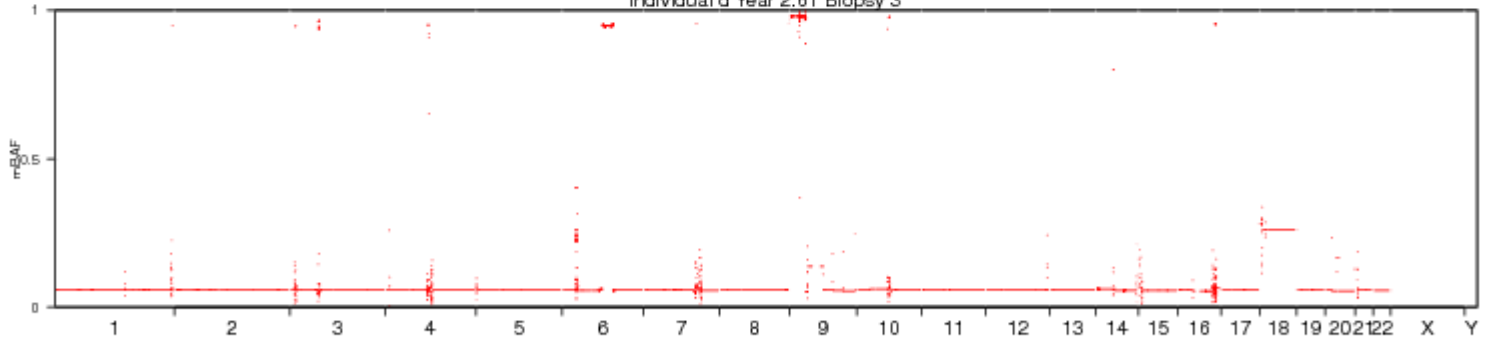

Individual d Year 2.61 Biopsy 3

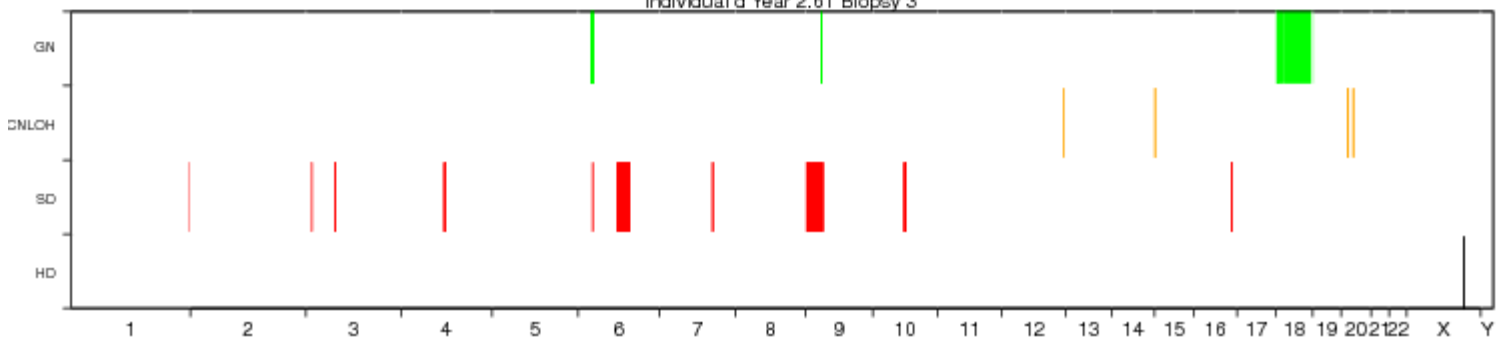

Individual d Year 2.61 Biopsy 4

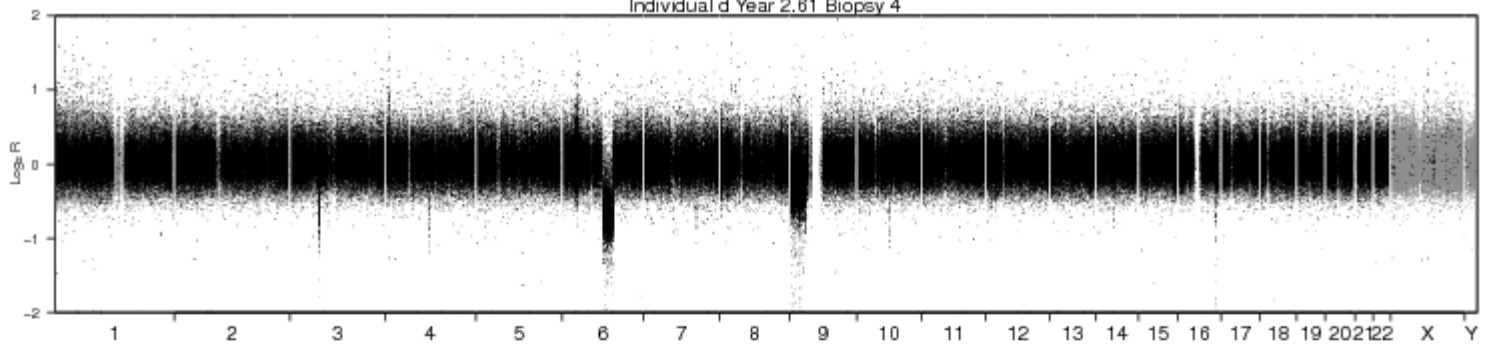

Individual d Year 2.61 Biopsy 4

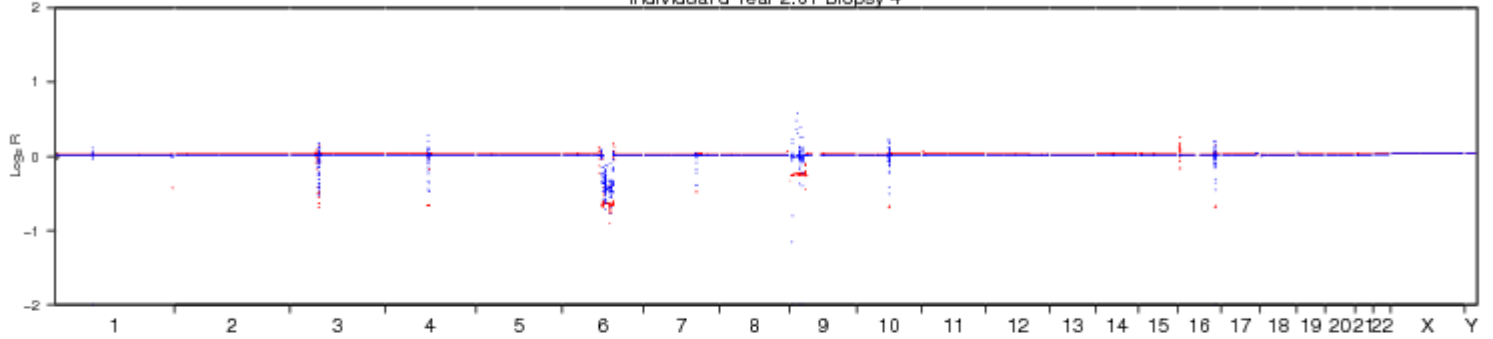

Individual d Year 2.61 Biopsy 4

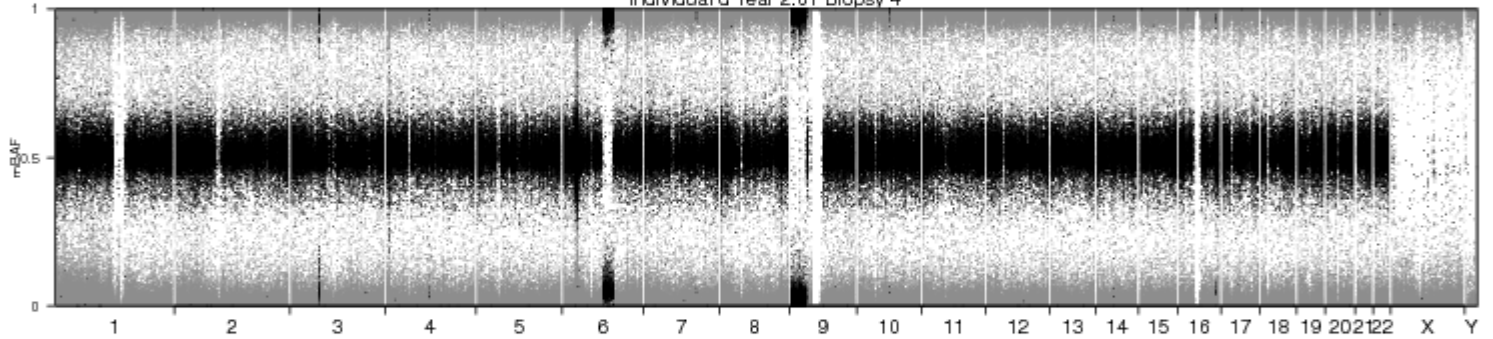

Individual d Year 2.61 Biopsy 4

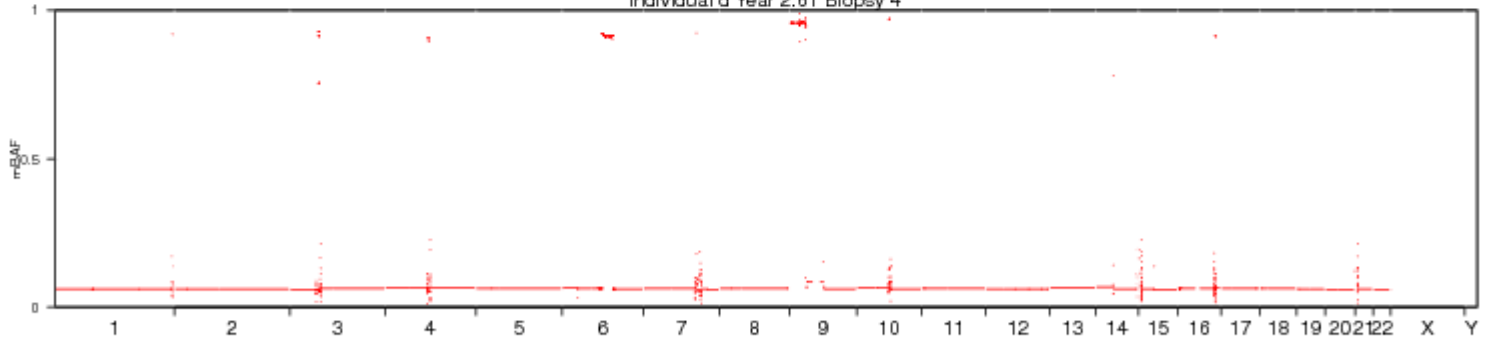

Individual d Year 2.61 Biopsy 4

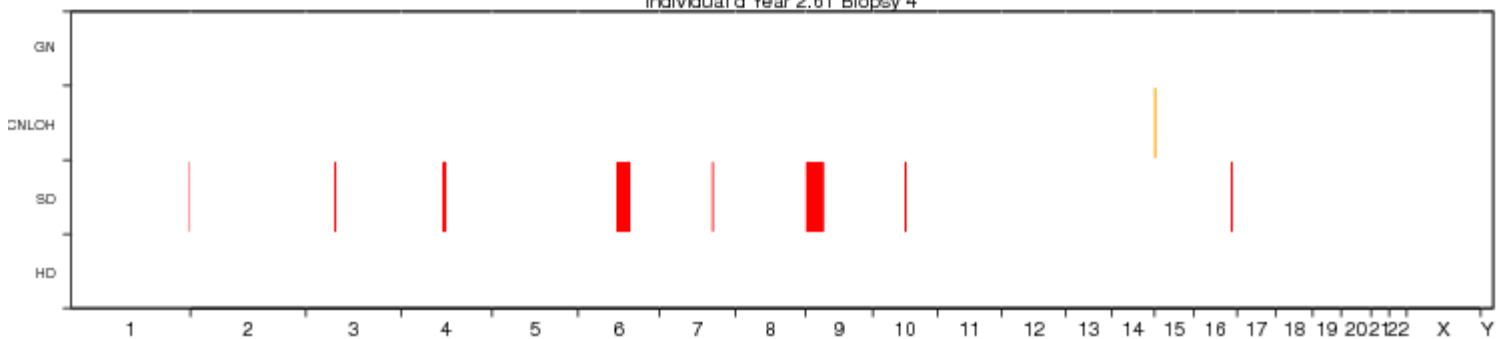

Individual d Year 5.42 Biopsy 5

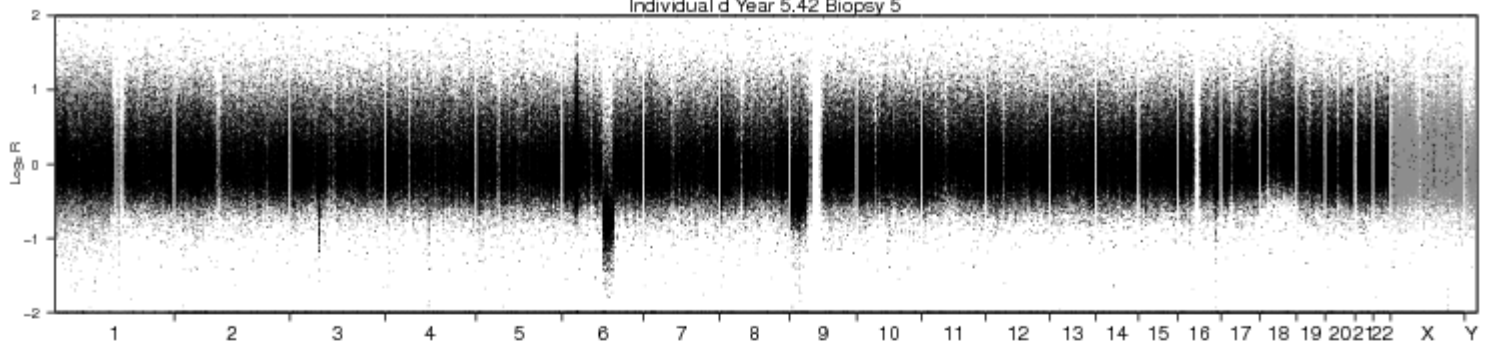

Individual d Year 5.42 Biopsy 5

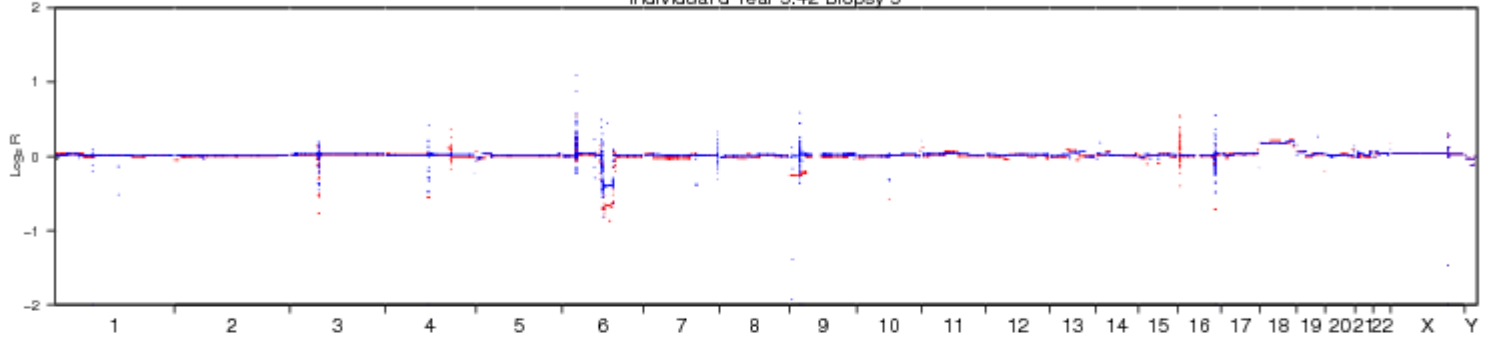

Individual d Year 5.42 Biopsy 5

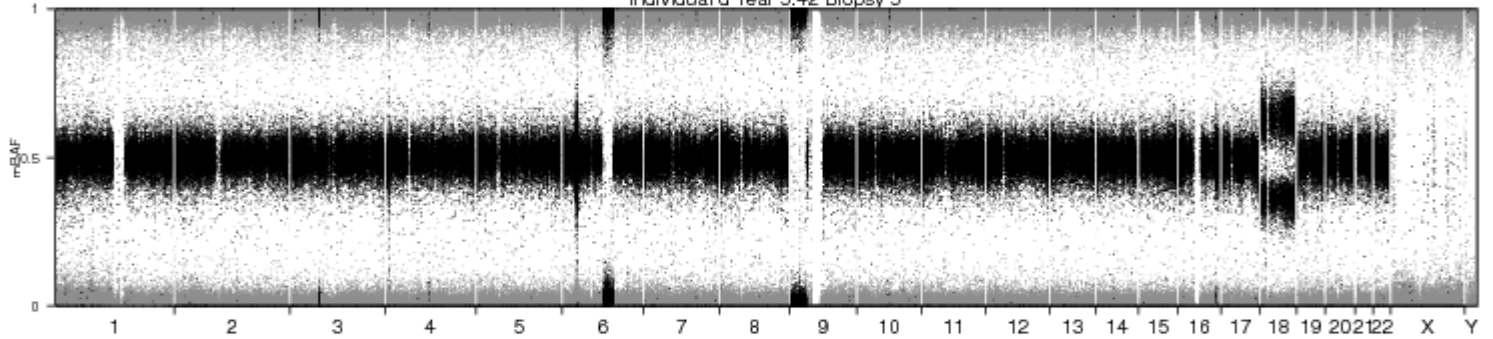

Individual d Year 5.42 Biopsy 5

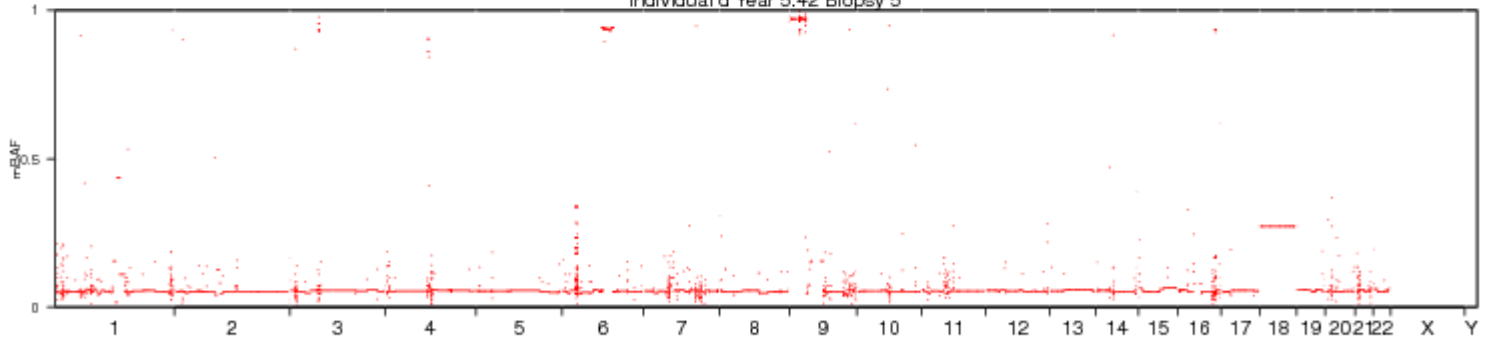

Individual d Year 5.42 Biopsy 5

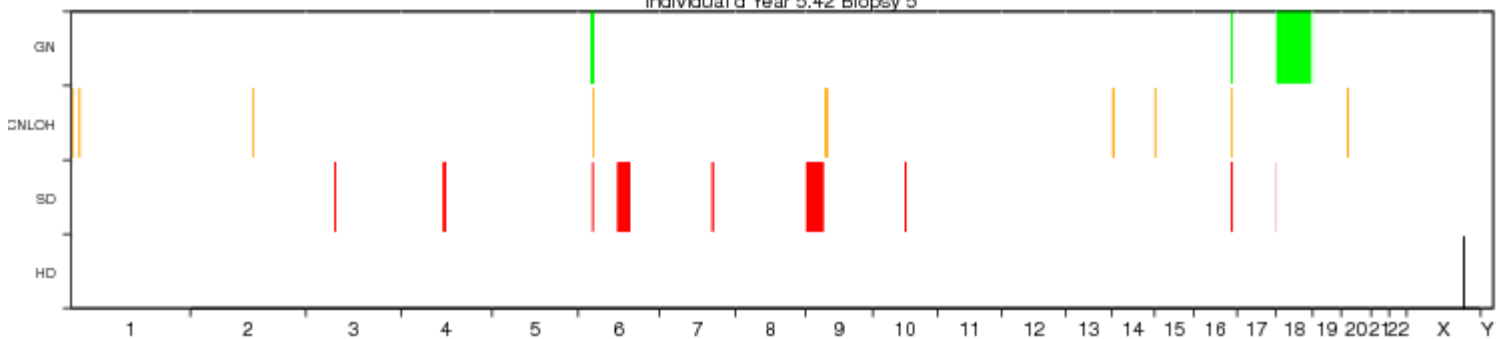



Individual d Year 5.42 Biopsy 6

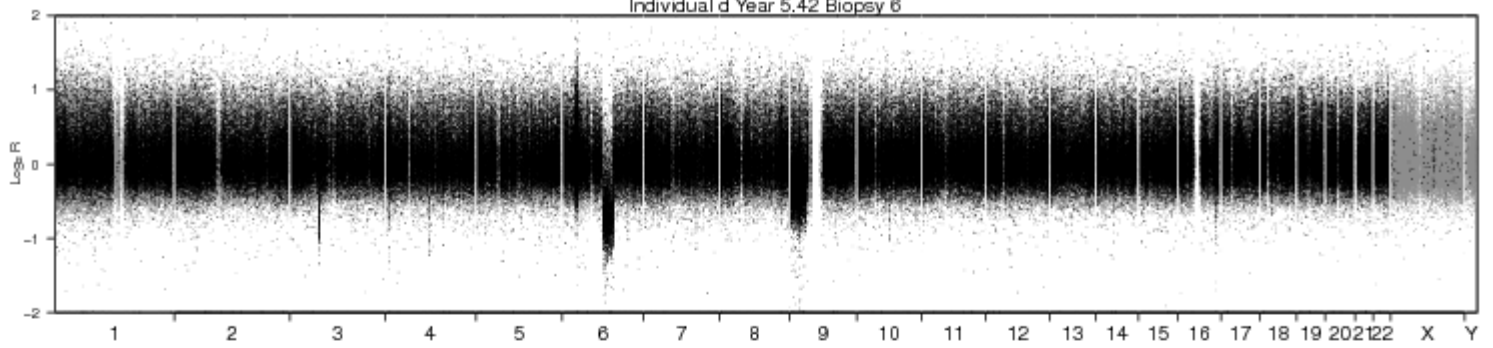

Individual d Year 5.42 Biopsy 6

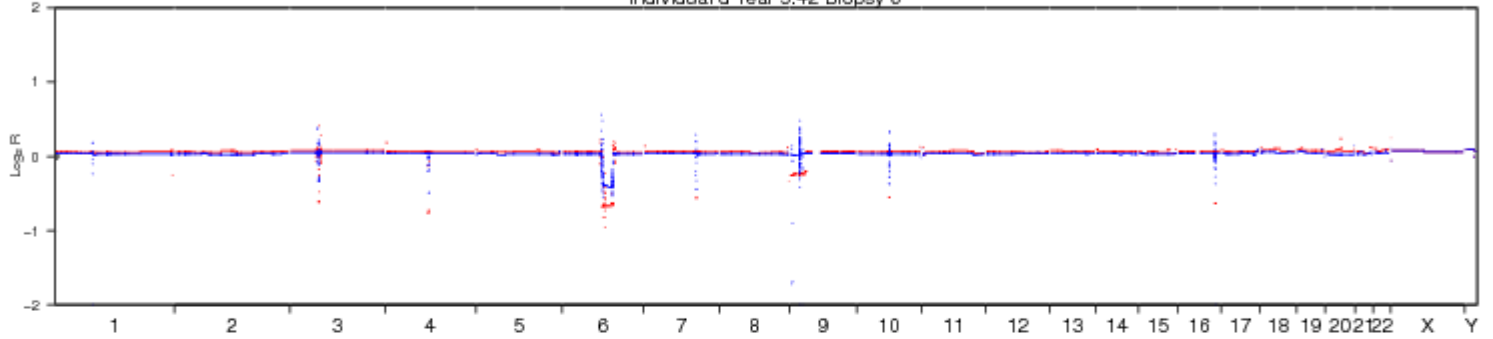

Individual d Year 5.42 Biopsy 6

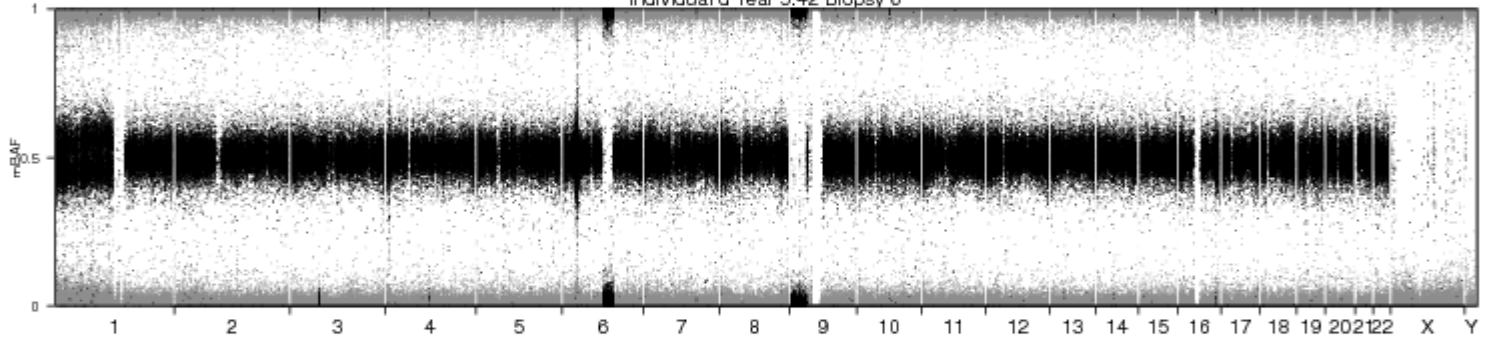

Individual d Year 5.42 Biopsy 6

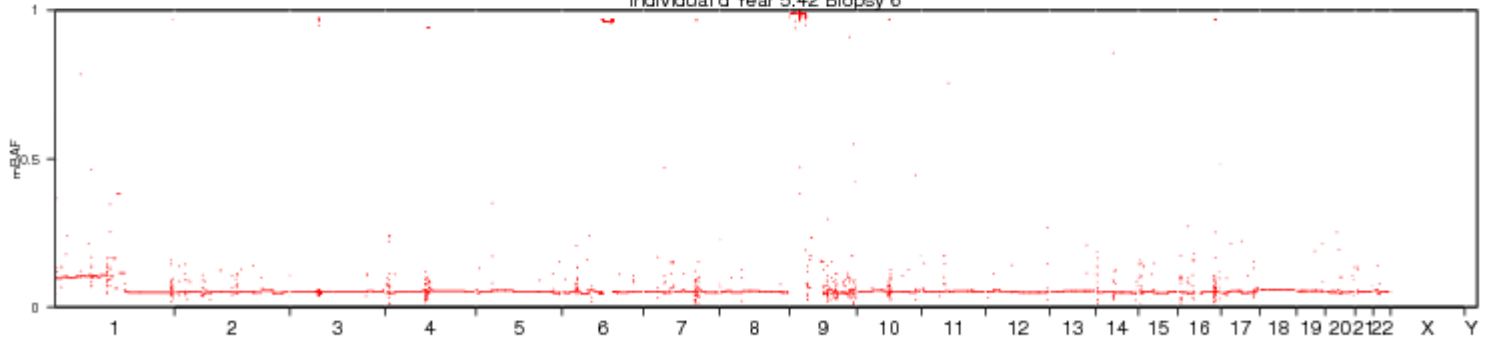

Individual d Year 5.42 Biopsy 6

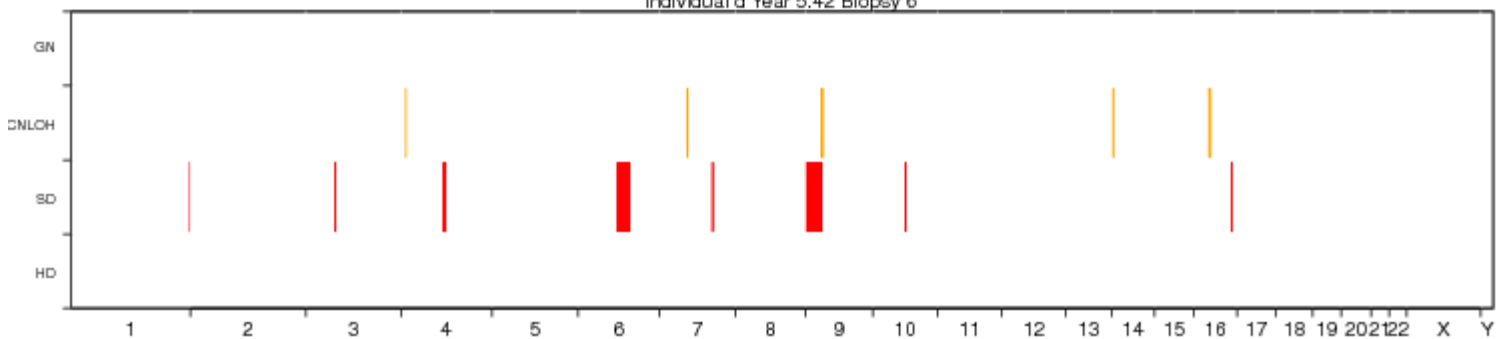



Individual d Year 6.35 Biopsy 7

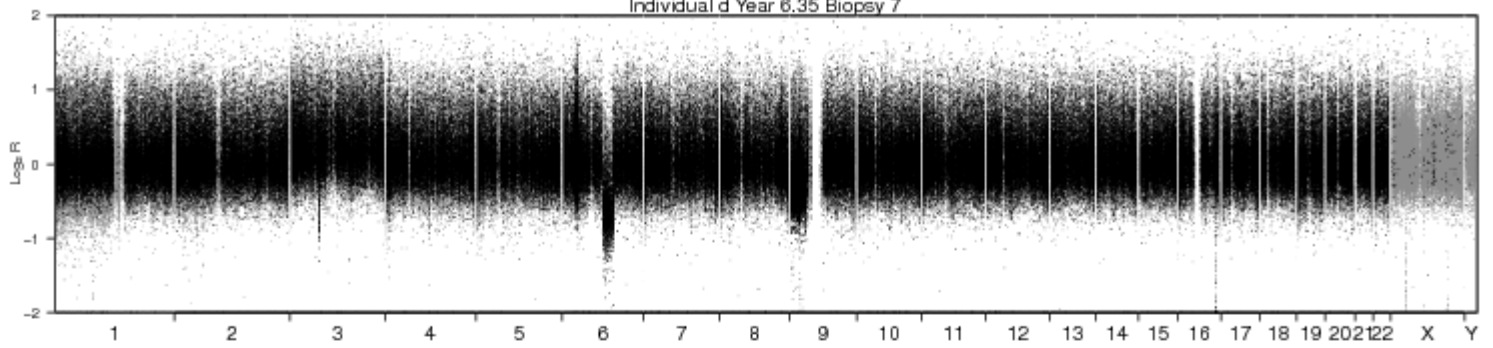

Individual d Year 6.35 Biopsy 7

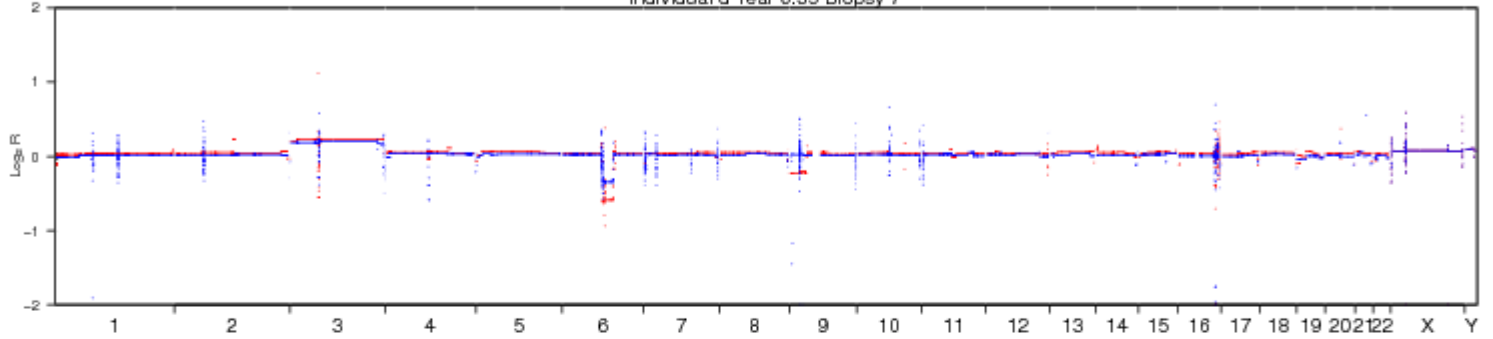

Individual d Year 6.35 Biopsy 7

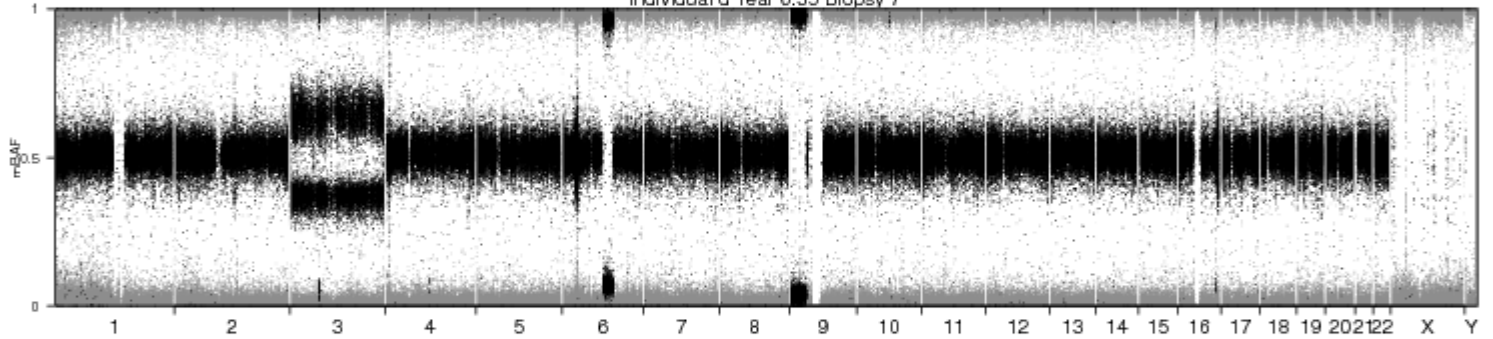

Individual d Year 6.35 Biopsy 7

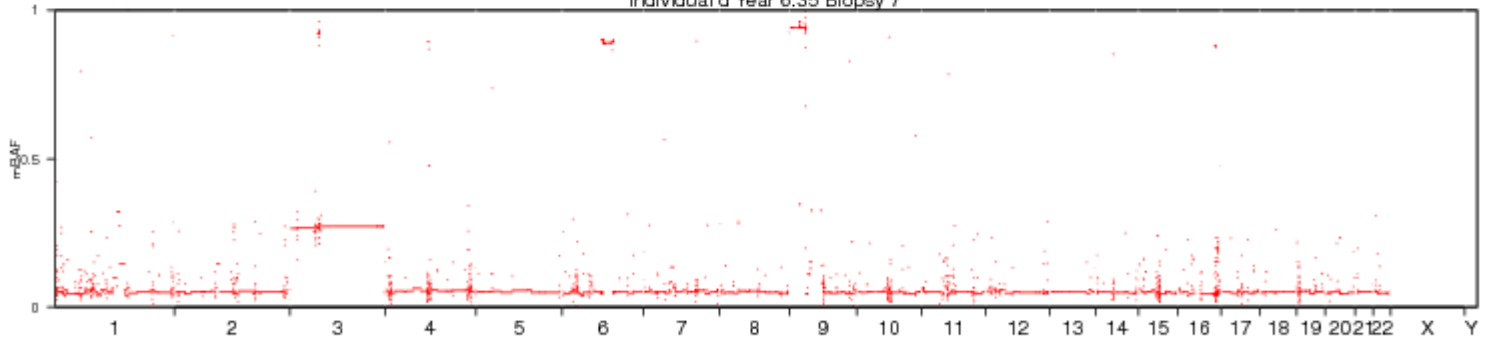

Individual d Year 6.35 Biopsy 7

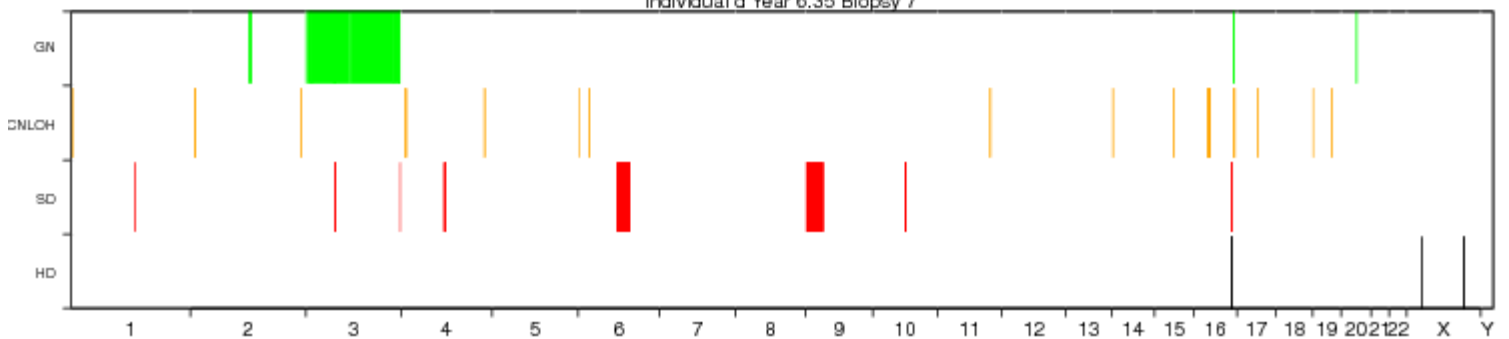

Individual d Year 6.35 Biopsy 8

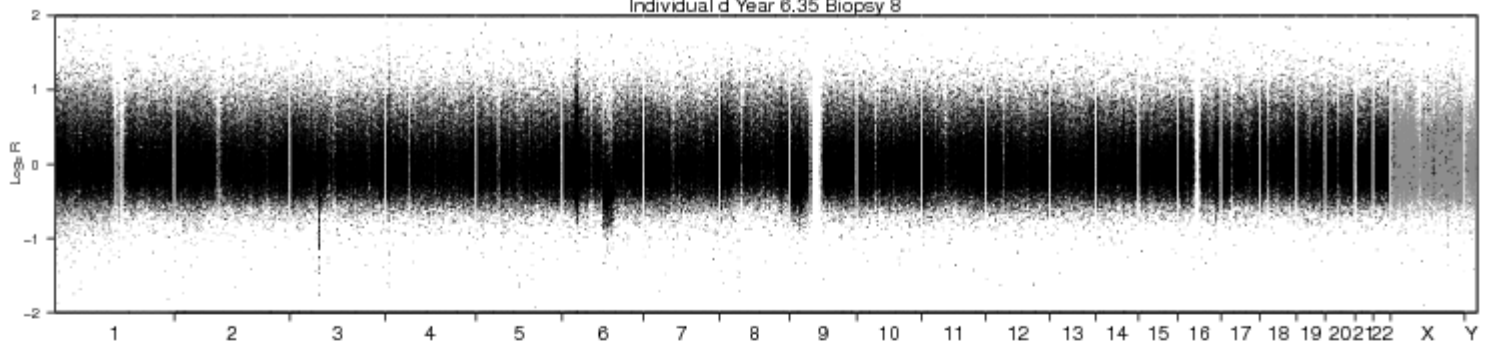

Individual d Year 6.35 Biopsy 8

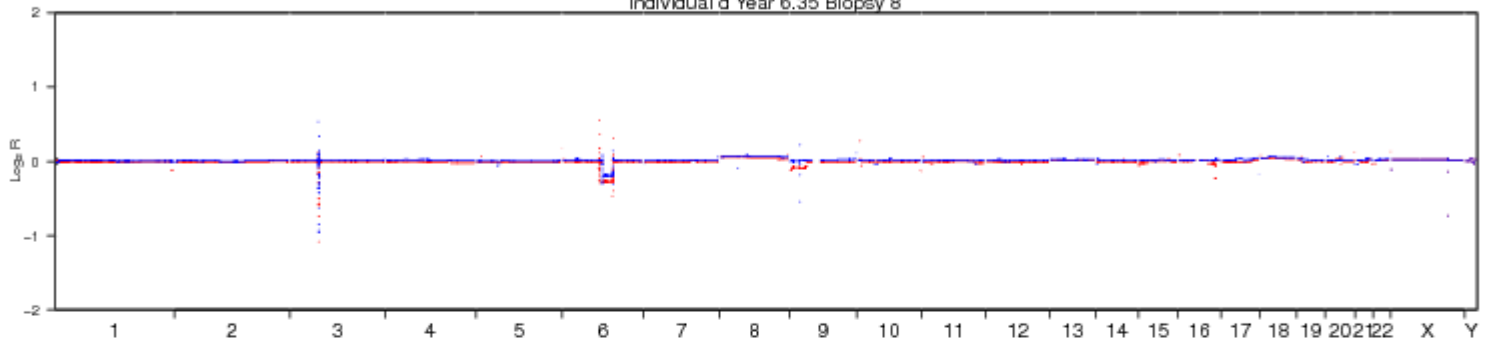

Individual d Year 6.35 Biopsy 8

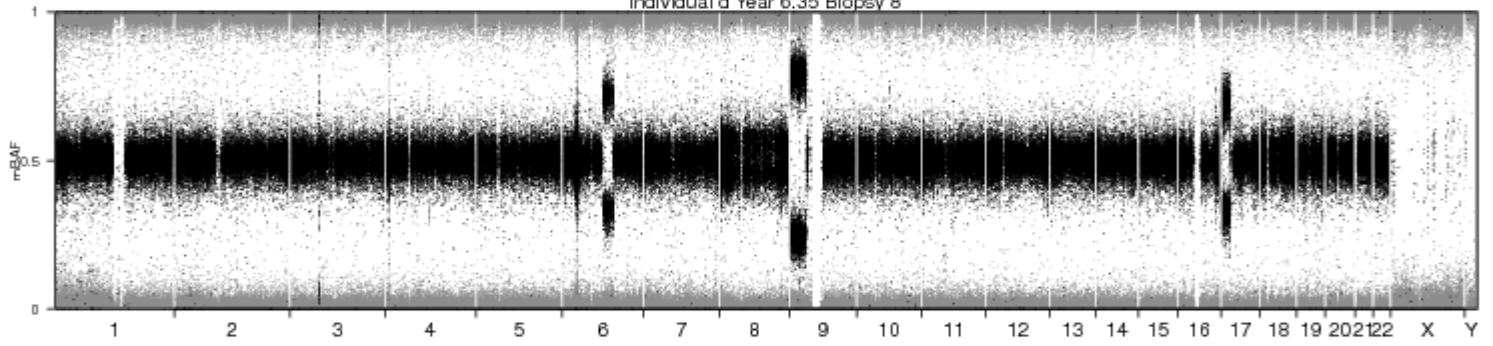

Individual d Year 6.35 Biopsy 8

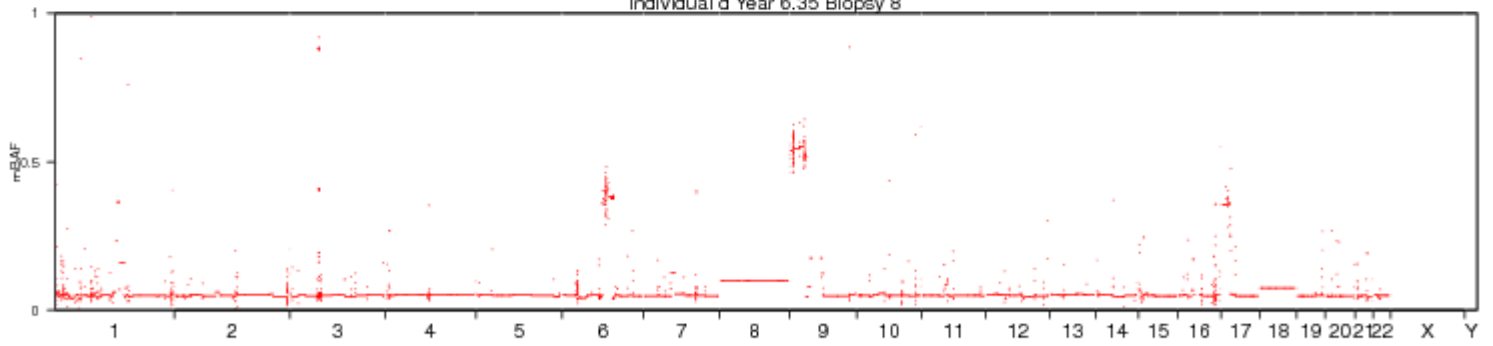

Individual d Year 6.35 Biopsy 8

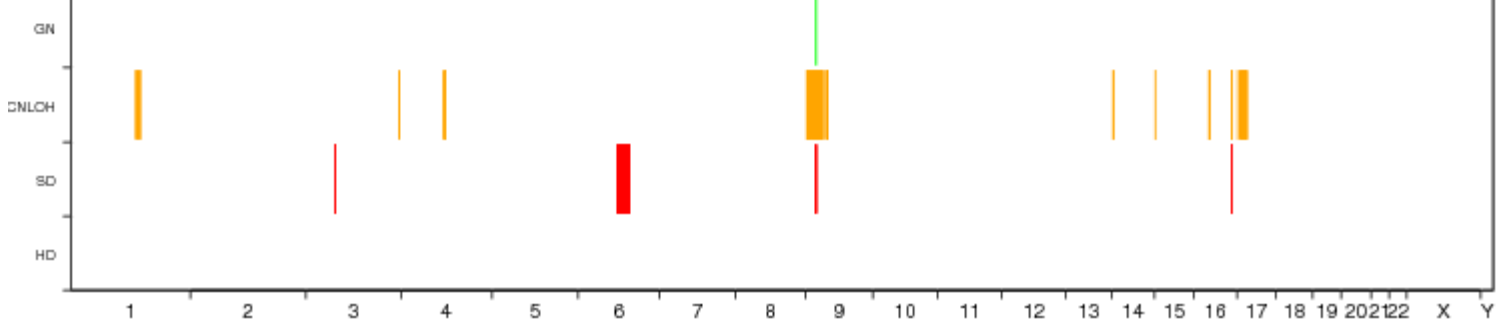

Individual d Year 7.86 Biopsy 9

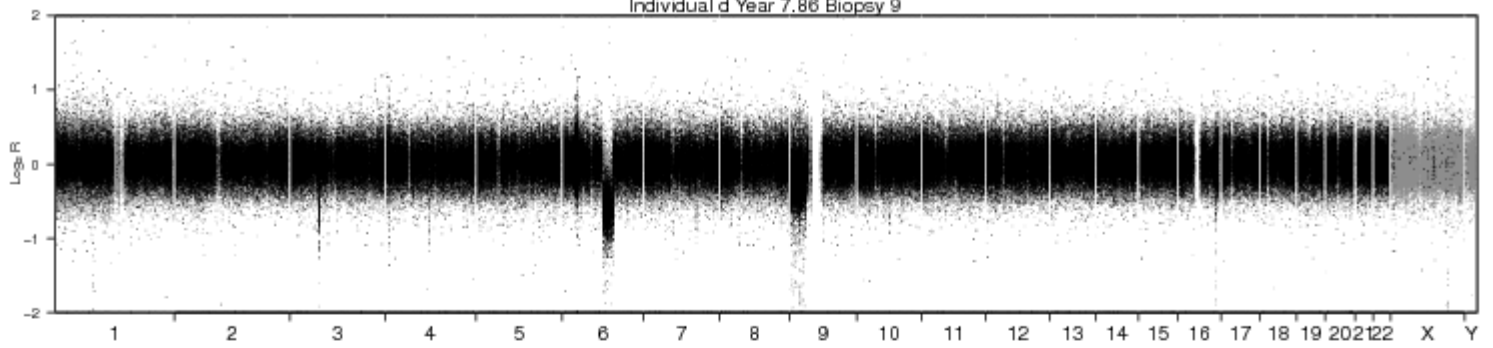

Individual d Year 7.86 Biopsy 9

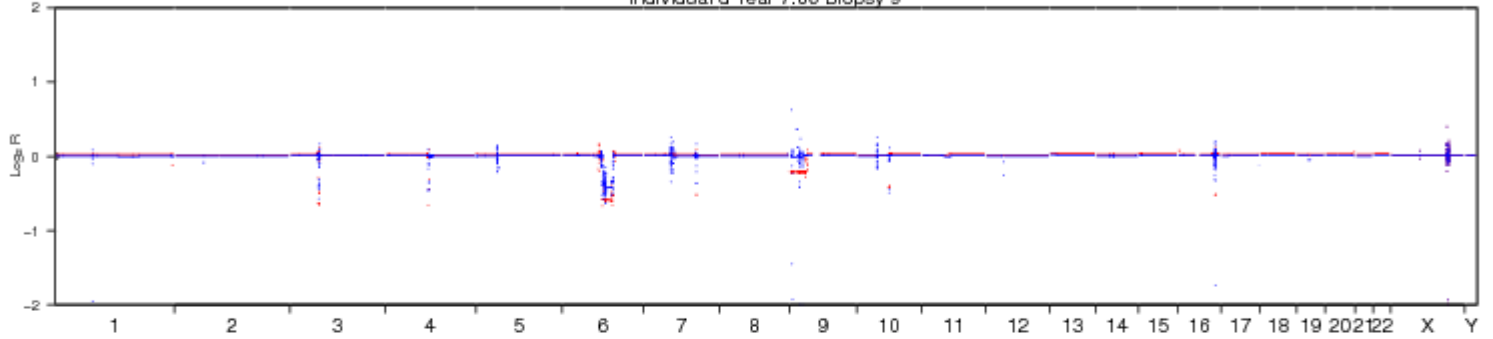

Individual d Year 7.86 Biopsy 9

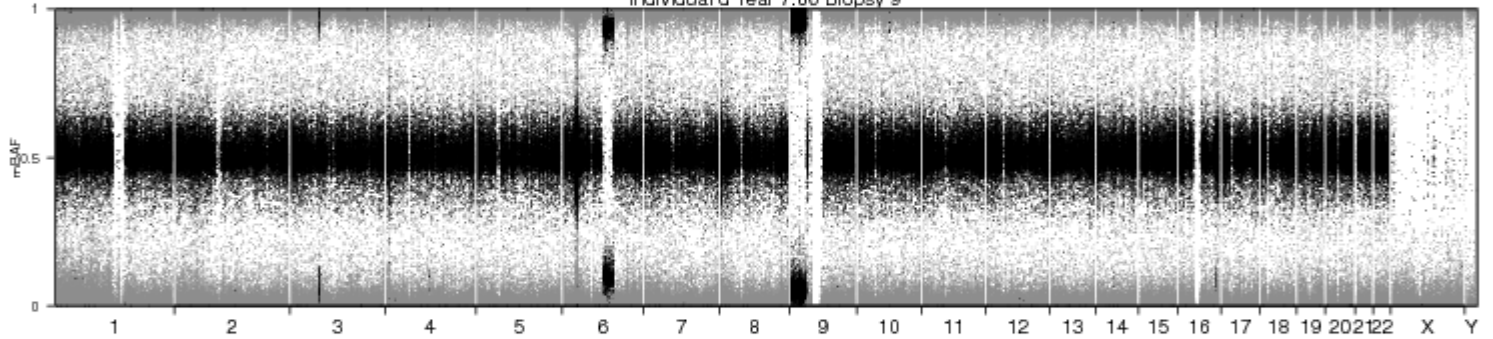

Individual d Year 7.86 Biopsy 9

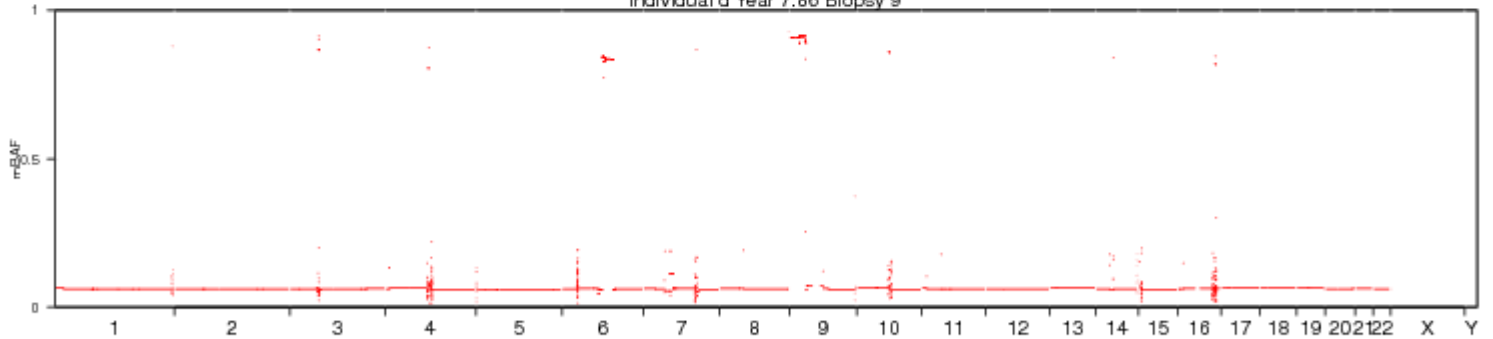

Individual d Year 7.86 Biopsy 9

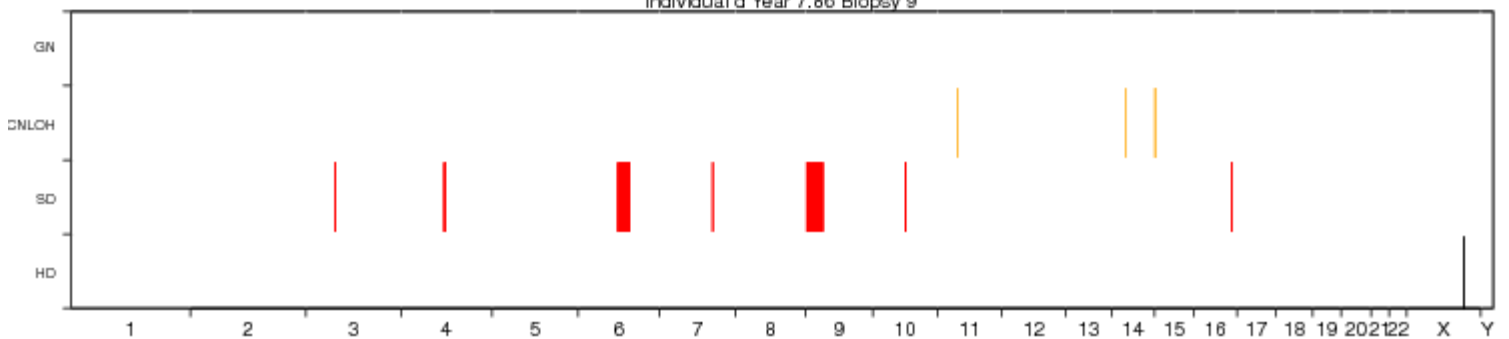

Individual d Year 8.5 Biopsy 10

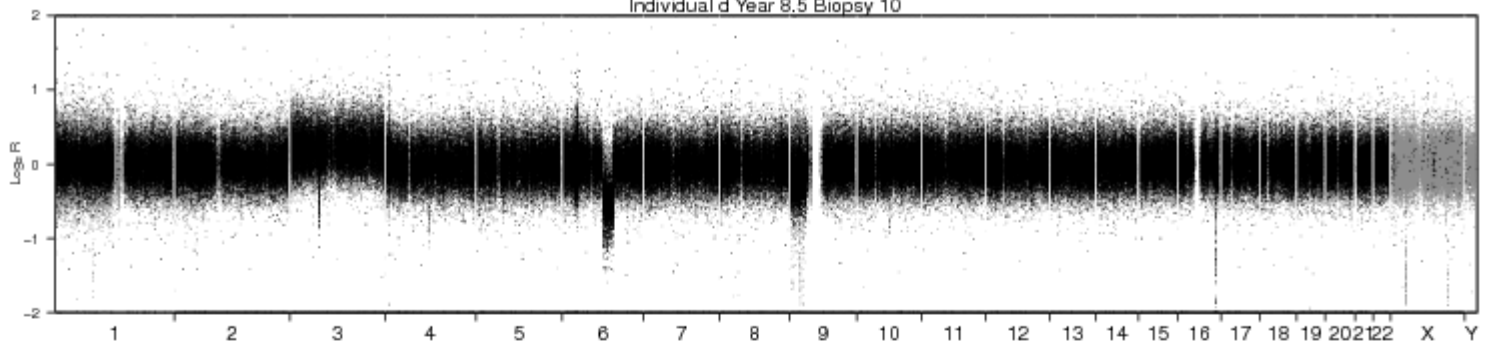

Individual d Year 8.5 Biopsy 10

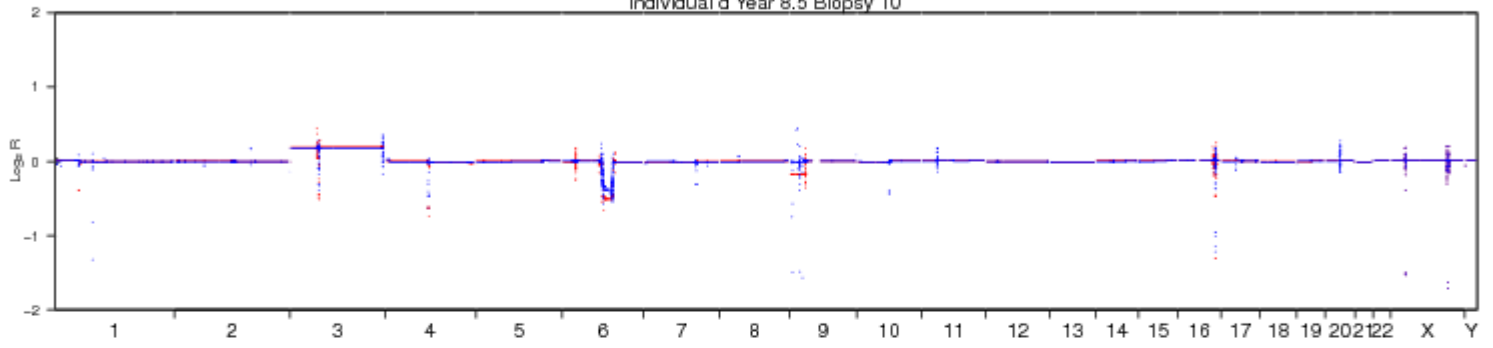

Individual d Year 8.5 Biopsy 10

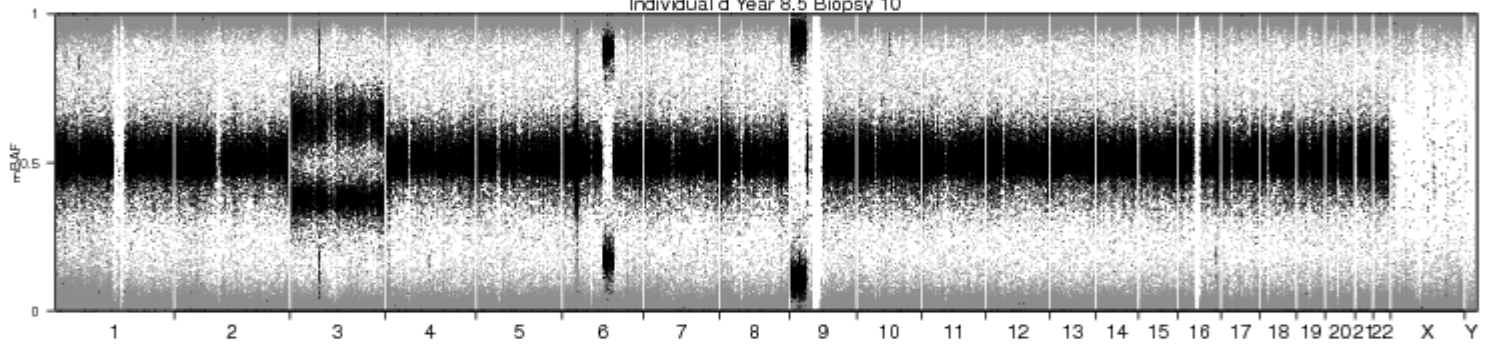

Individual d Year 8.5 Biopsy 10

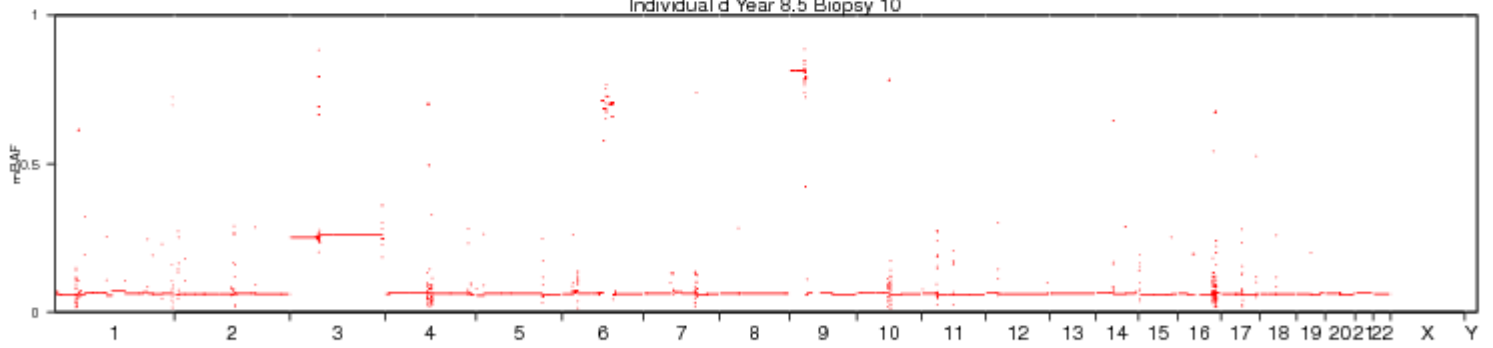

Individual d Year 8.5 Biopsy 10

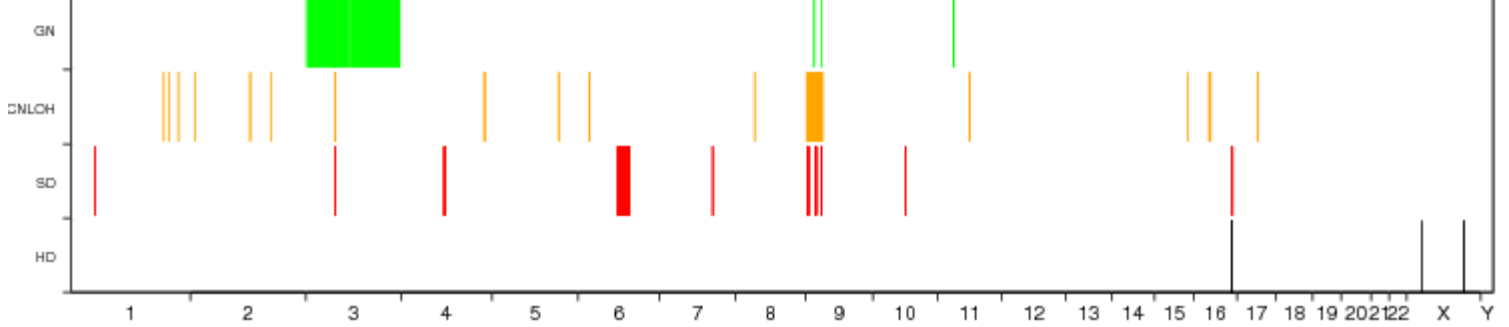



Individual d Year 8.5 Biopsy 11

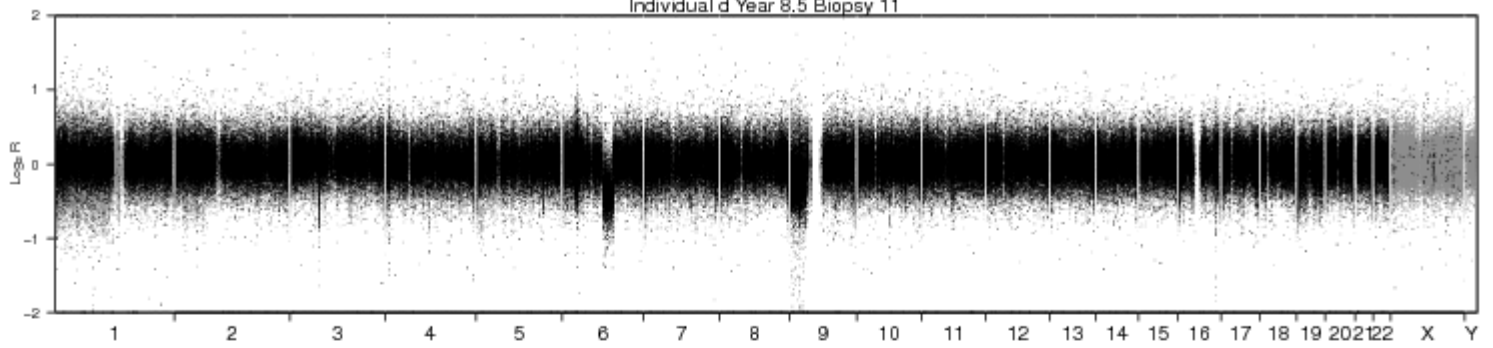

Individual d Year 8.5 Biopsy 11

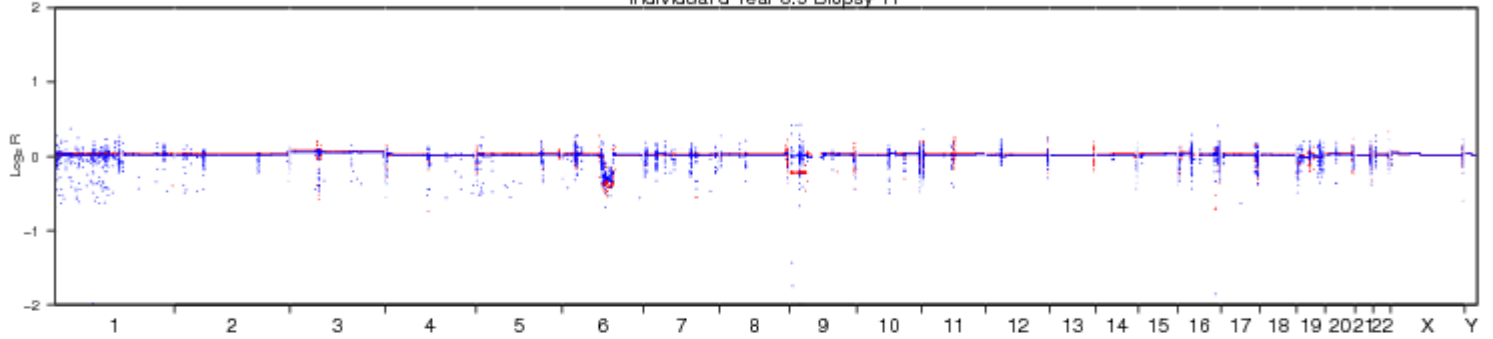

Individual d Year 8.5 Biopsy 11

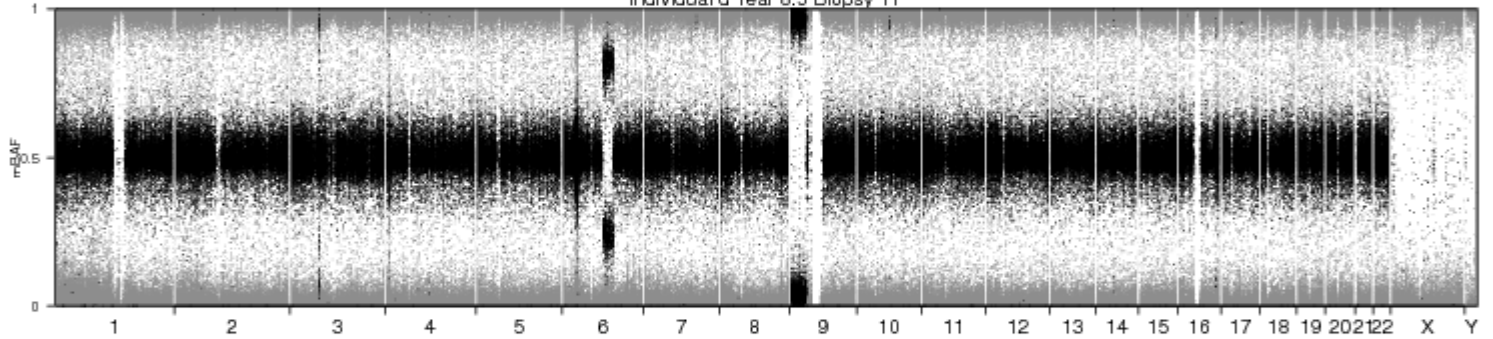

Individual d Year 8.5 Biopsy 11

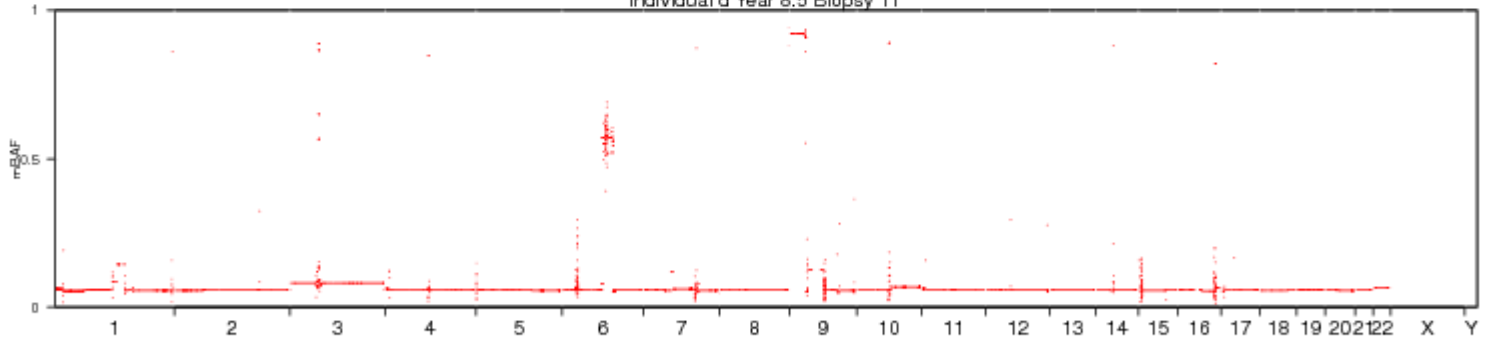

Individual d Year 8.5 Biopsy 11

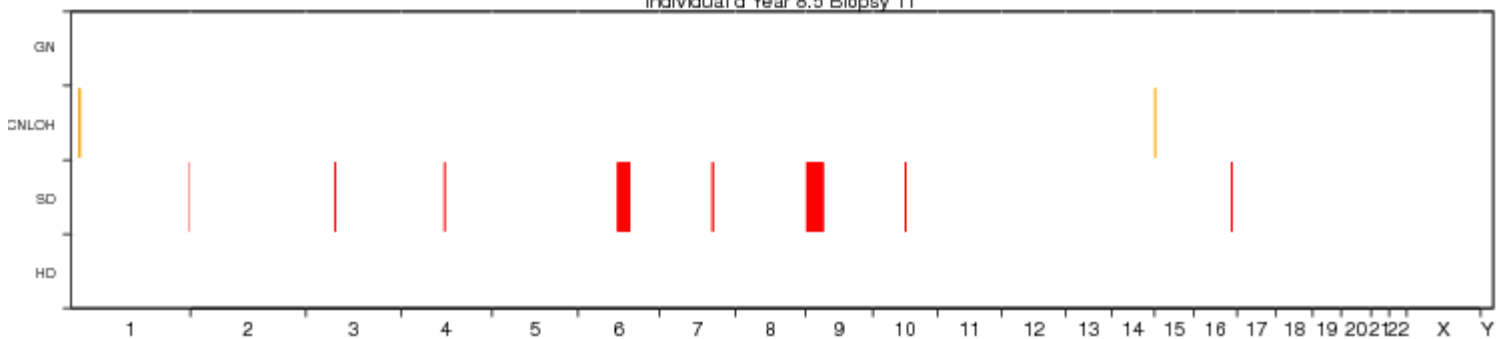

Individual e Year 0 Biopsy 1

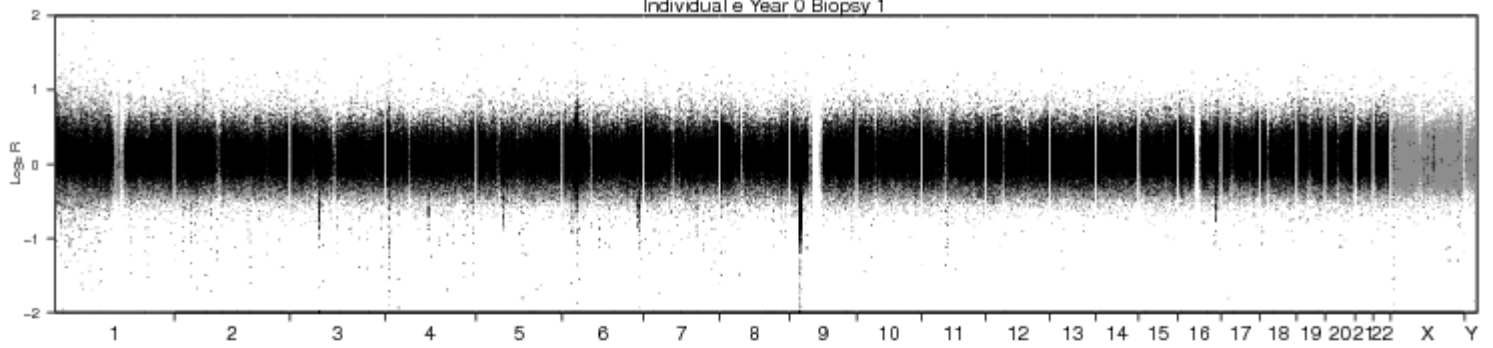

Individual e Year 0 Biopsy 1

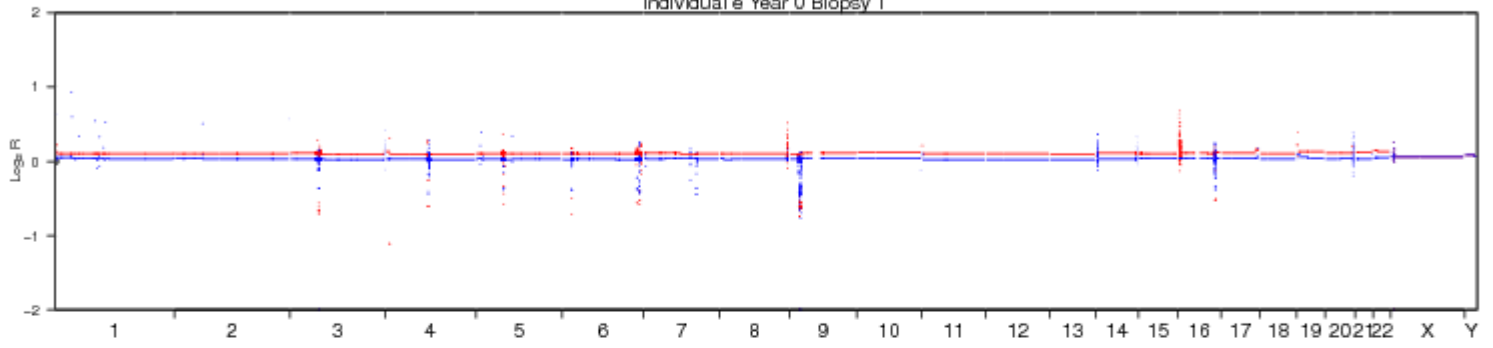

Individual e Year 0 Biopsy 1

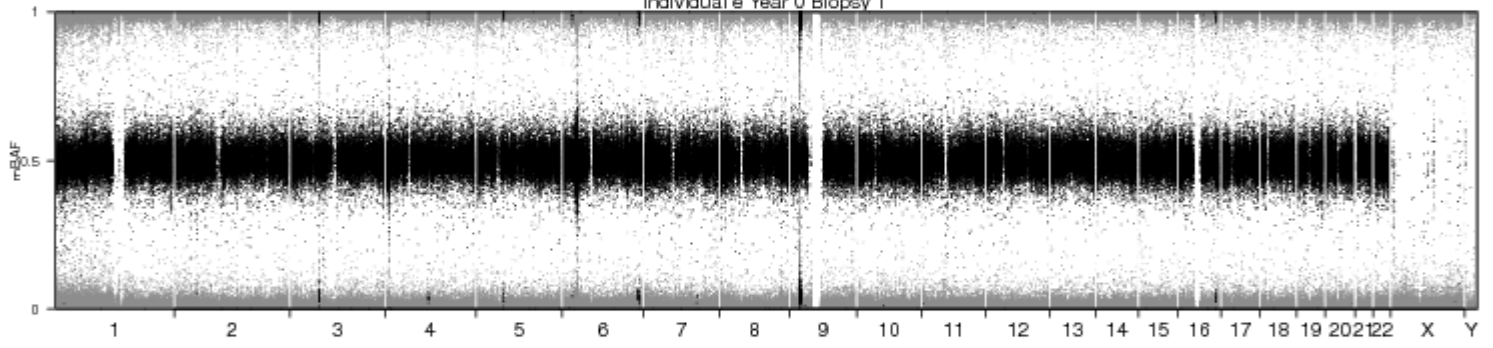

Individual e Year 0 Biopsy 1

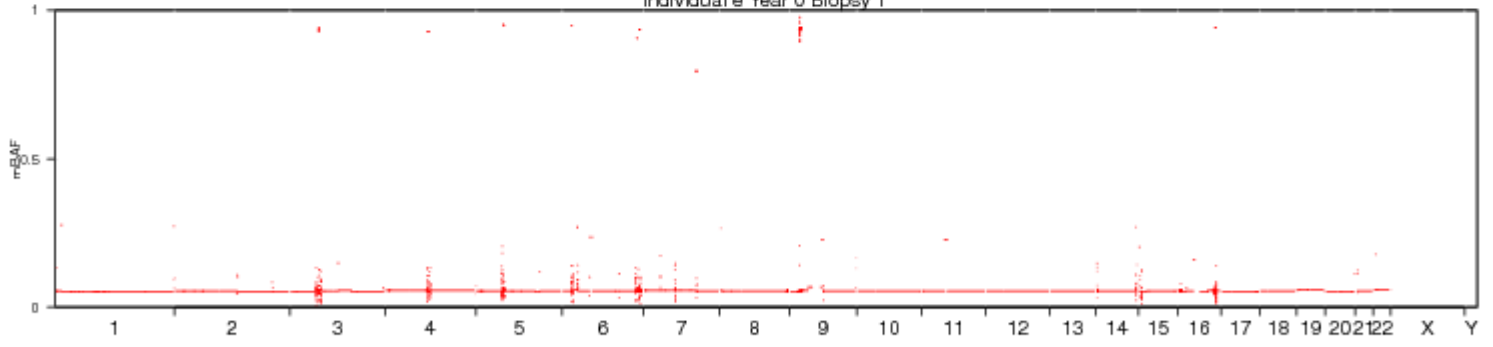

Individual e Year 0 Biopsy 1

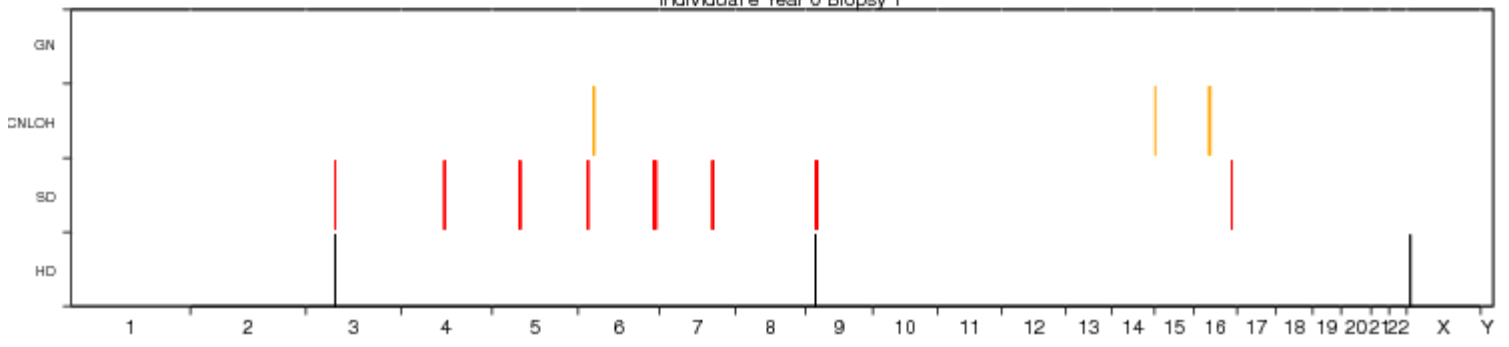

Individual e Year 0 Biopsy 2

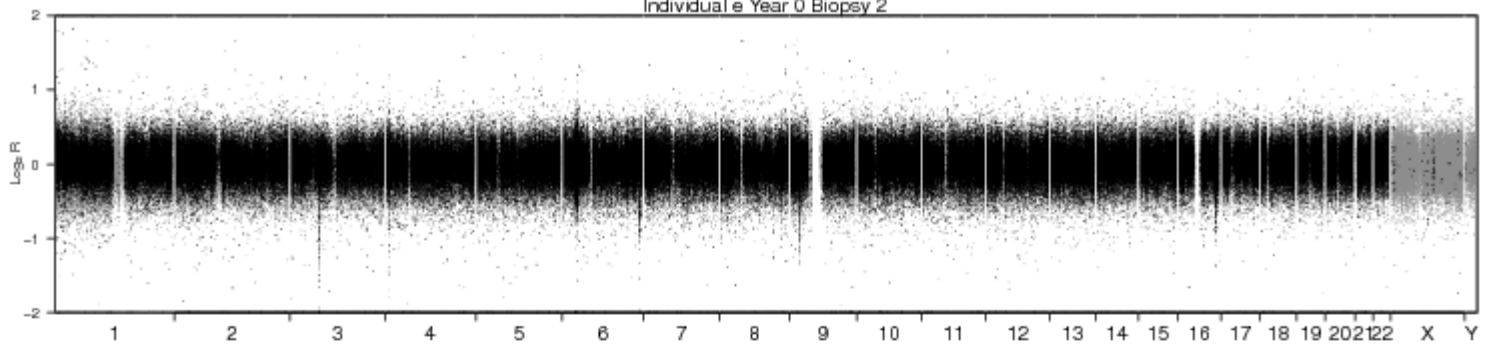

Individual e Year 0 Biopsy 2

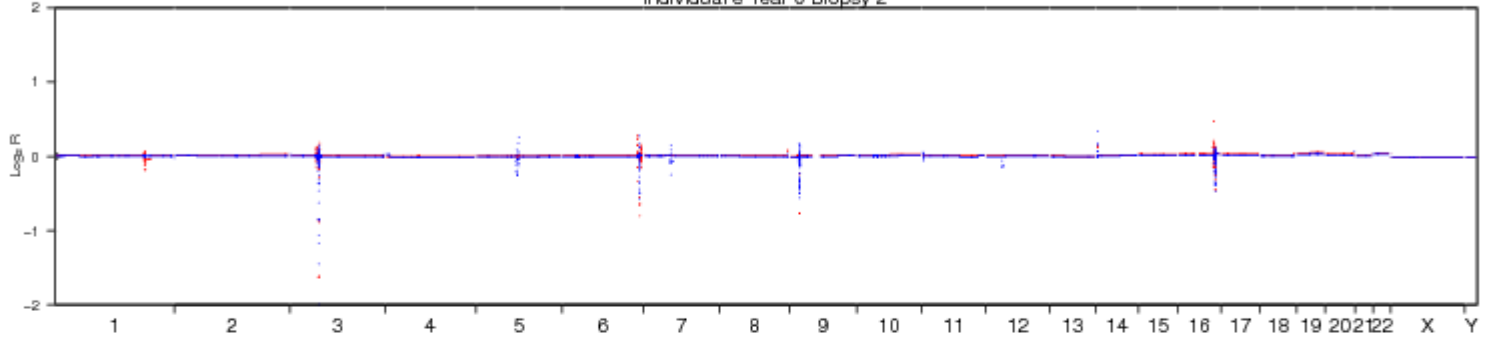

Individual e Year 0 Biopsy 2

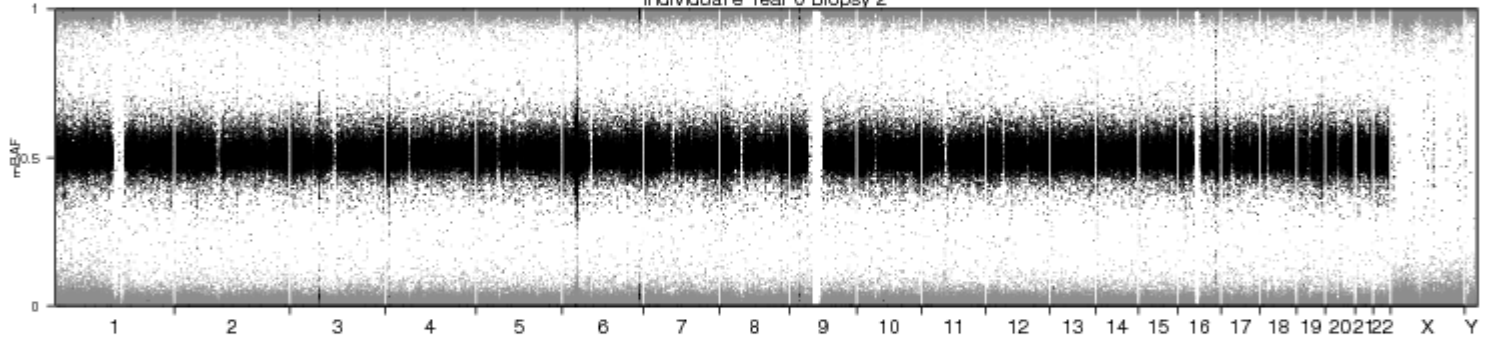

Individual e Year 0 Biopsy 2

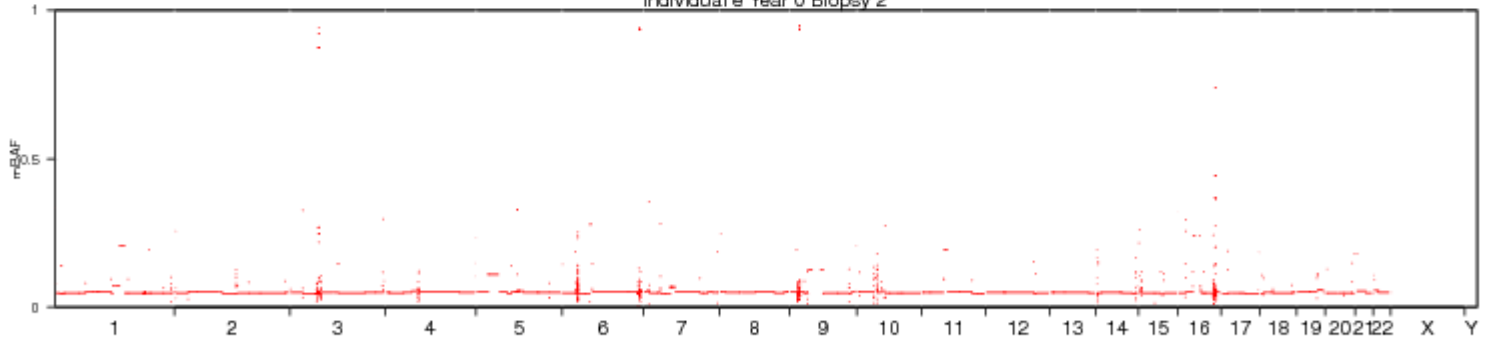

Individual e Year 0 Biopsy 2

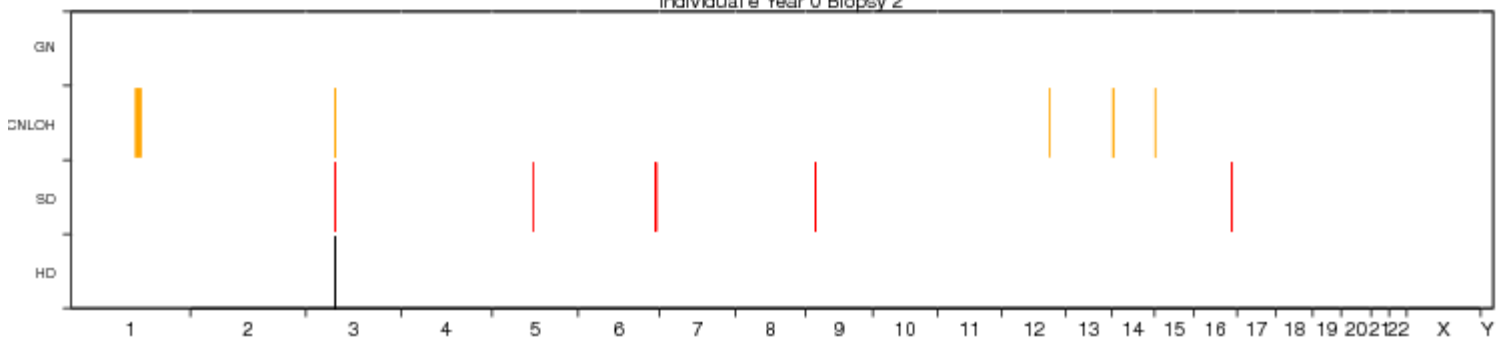

Individual e Year 1.53 Biopsy 3

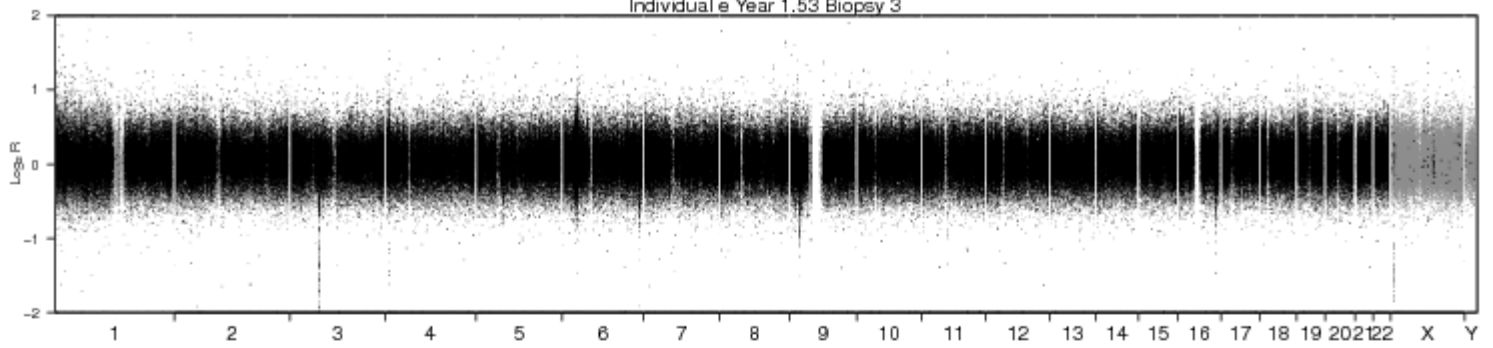

Individual e Year 1.53 Biopsy 3

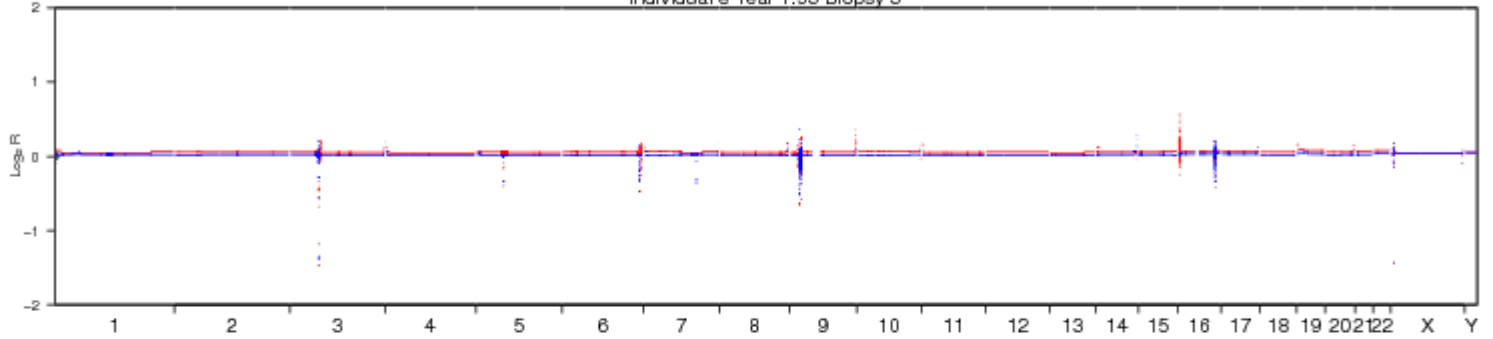

Individual e Year 1.53 Biopsy 3

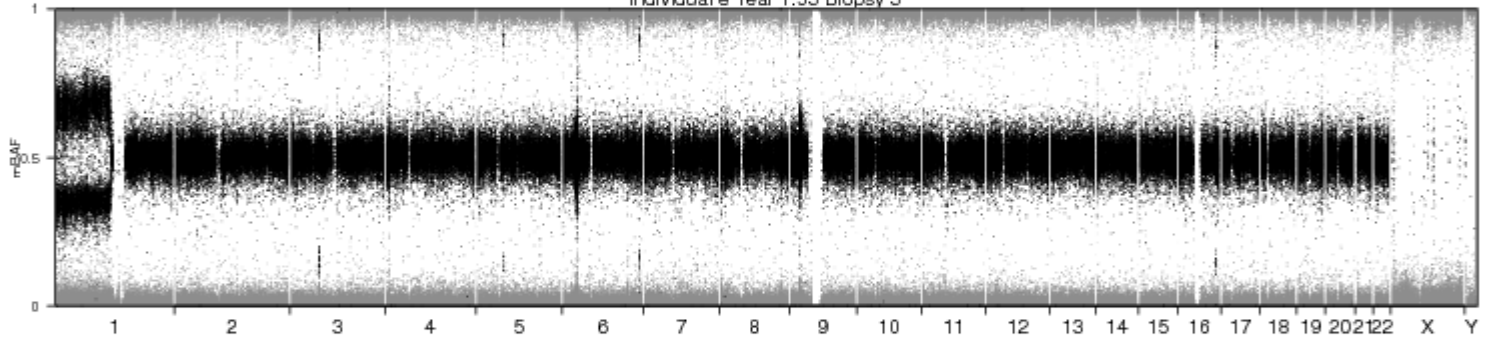

Individual e Year 1.53 Biopsy 3

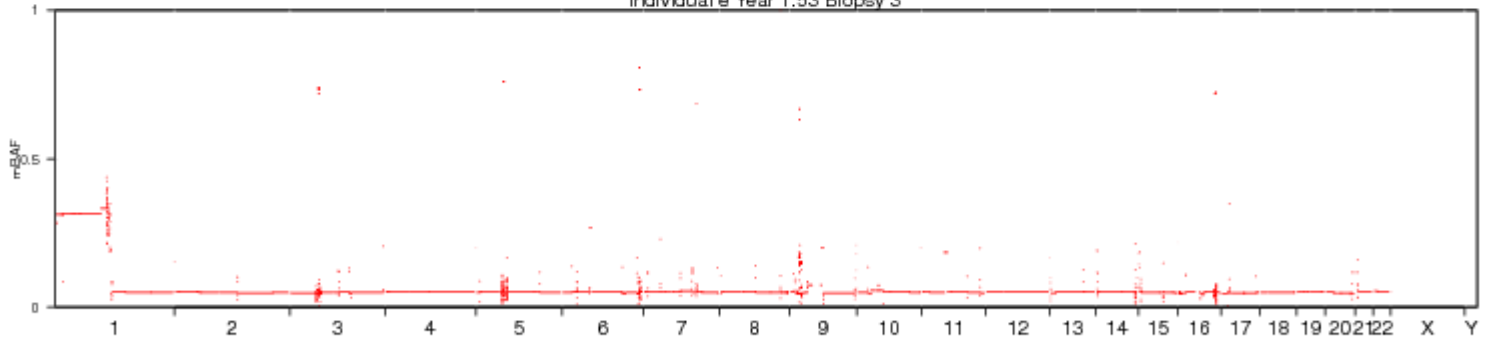

Individual e Year 1.53 Biopsy 3

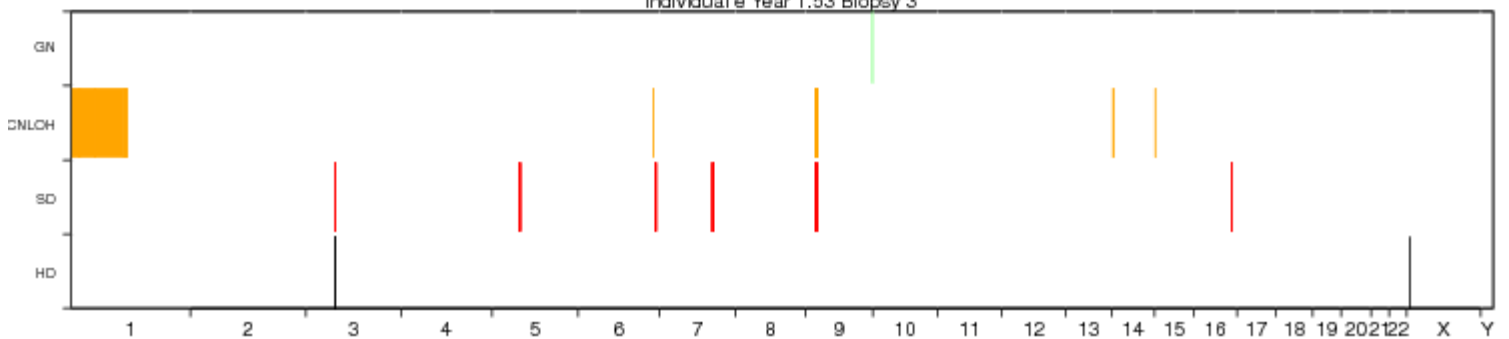



Individual e Year 1.53 Biopsy 4

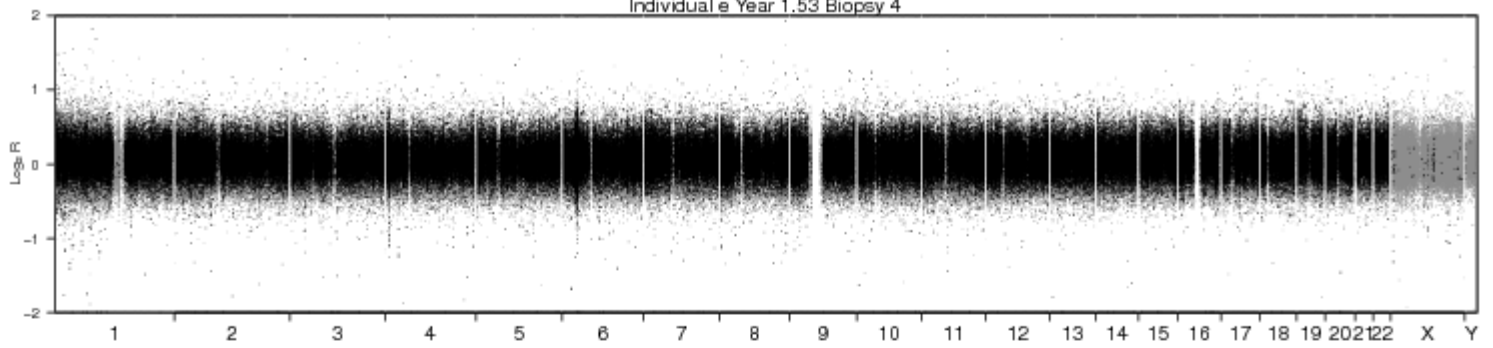

Individual e Year 1.53 Biopsy 4

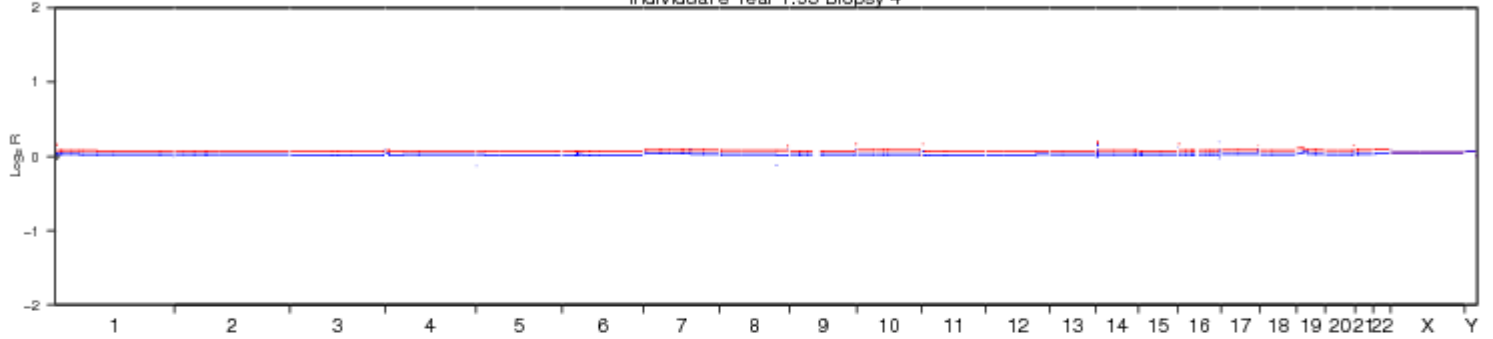

Individual e Year 1.53 Biopsy 4

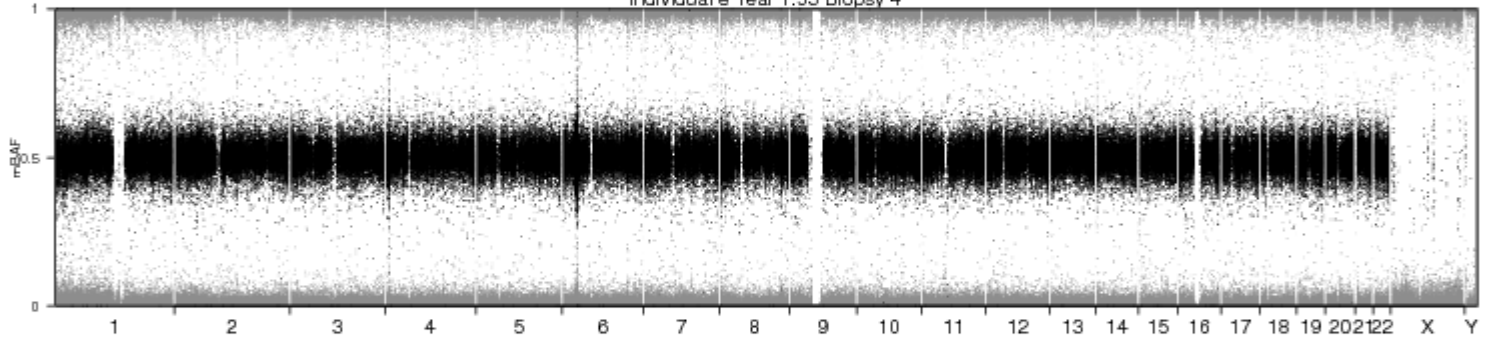

Individual e Year 1.53 Biopsy 4

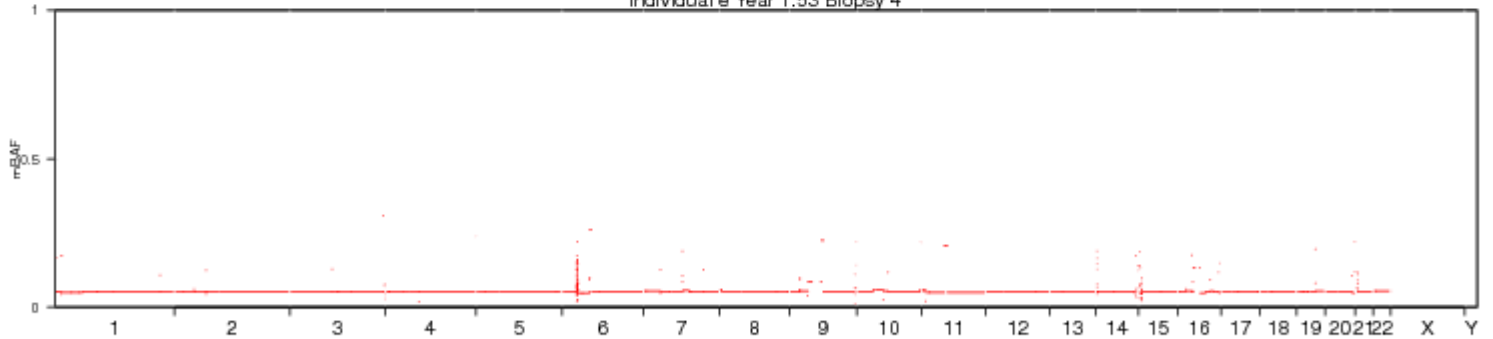

Individual e Year 1.53 Biopsy 4

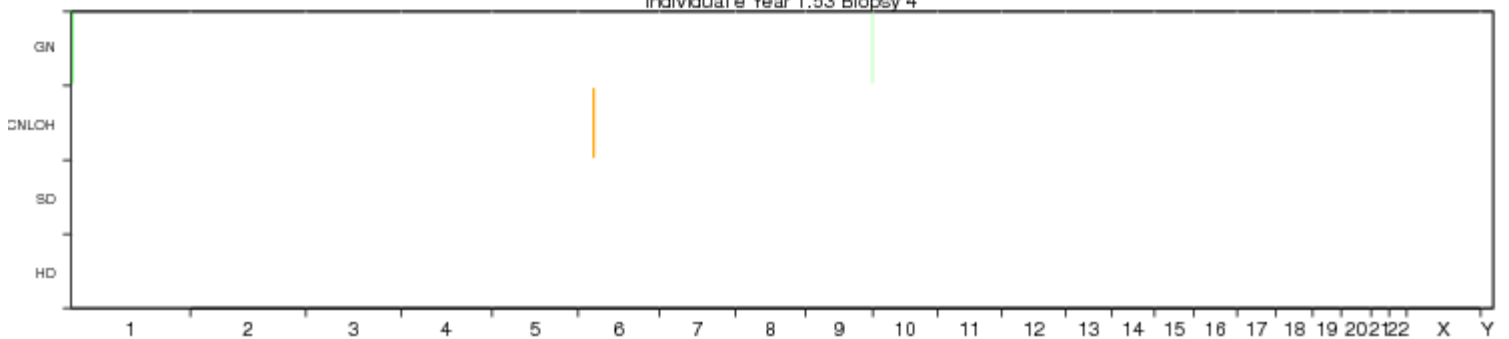

Individual e Year 4.24 Biopsy 5

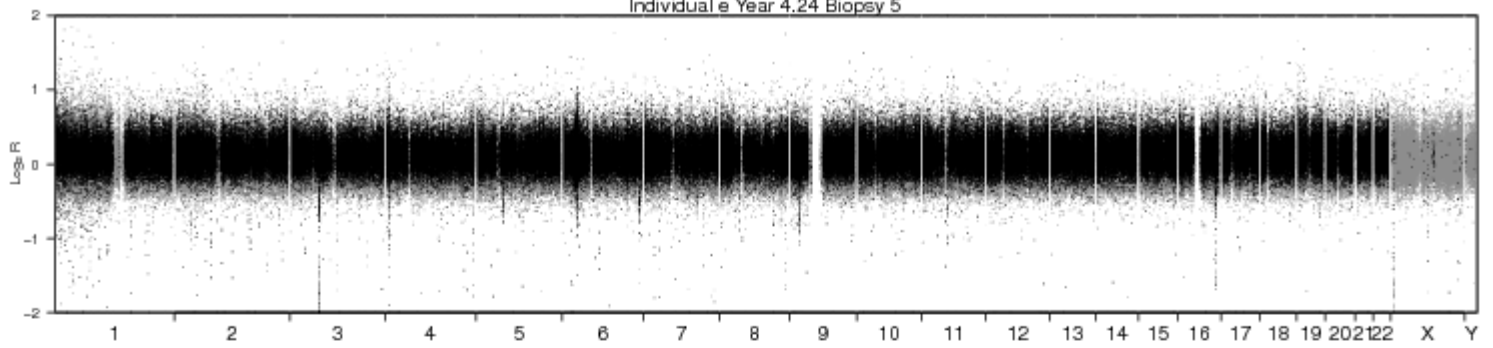

Individual e Year 4.24 Biopsy 5

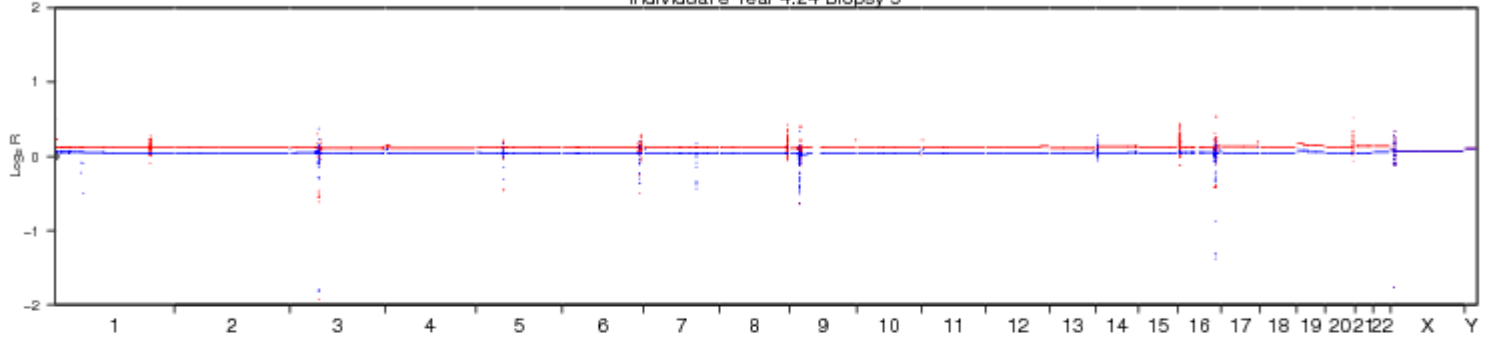

Individual e Year 4.24 Biopsy 5

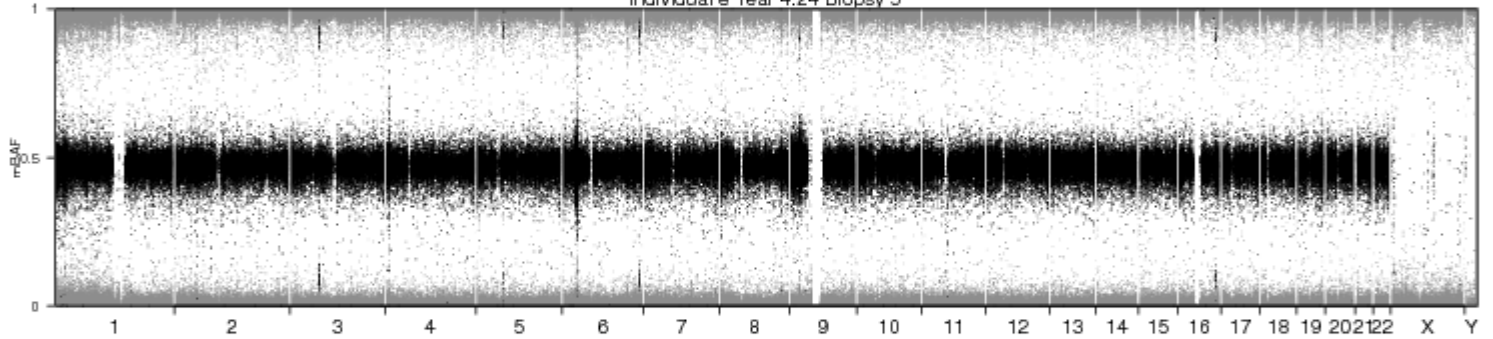

Individual e Year 4.24 Biopsy 5

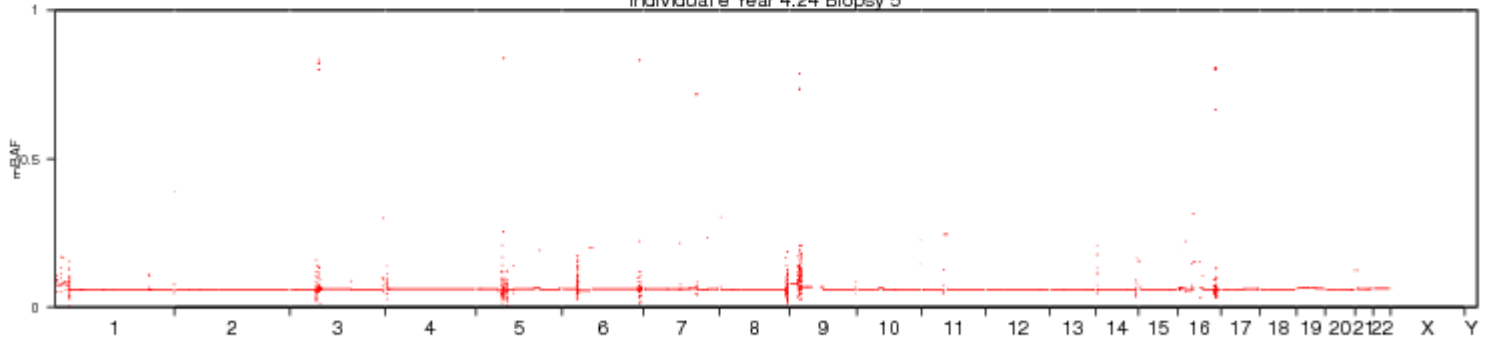

Individual e Year 4.24 Biopsy 5

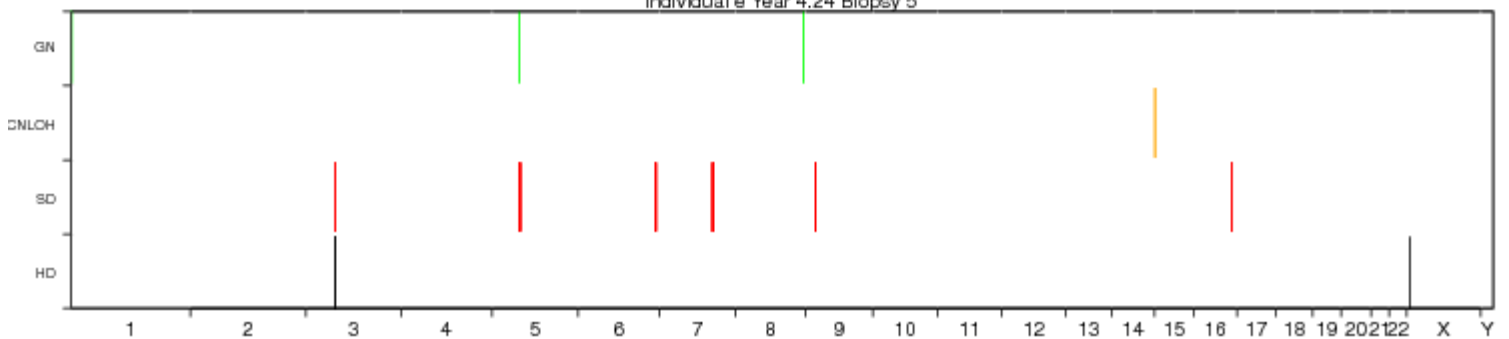

Individual e Year 4.24 Biopsy 6

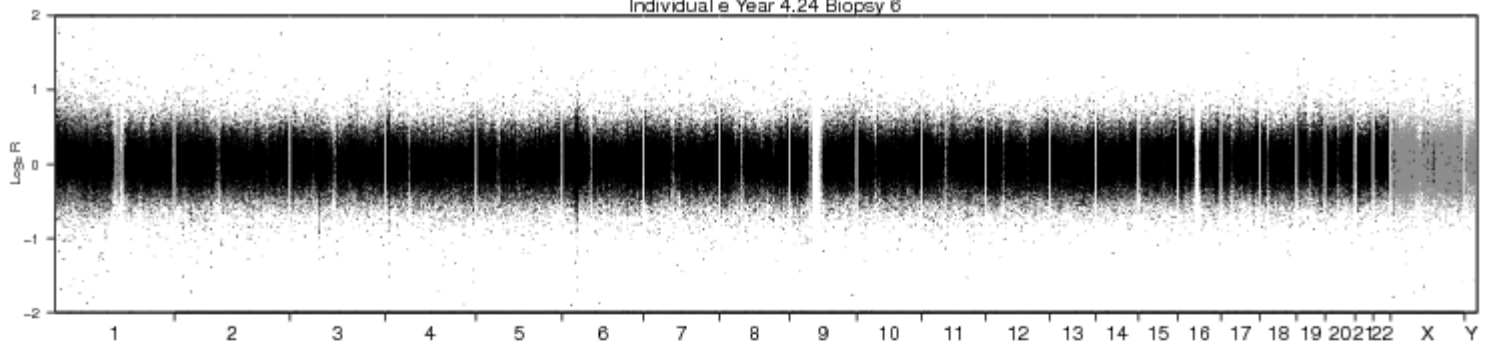

Individual e Year 4.24 Biopsy 6

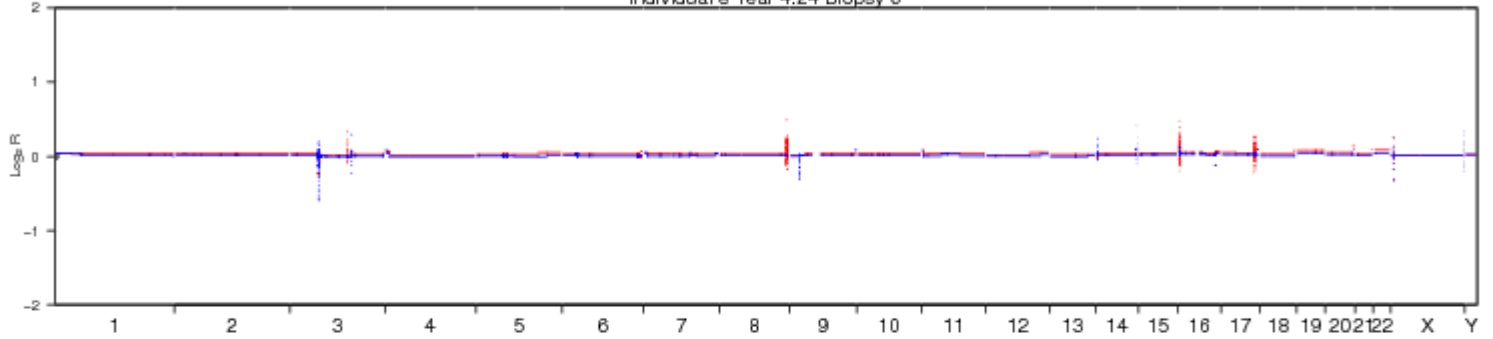

Individual e Year 4.24 Biopsy 6

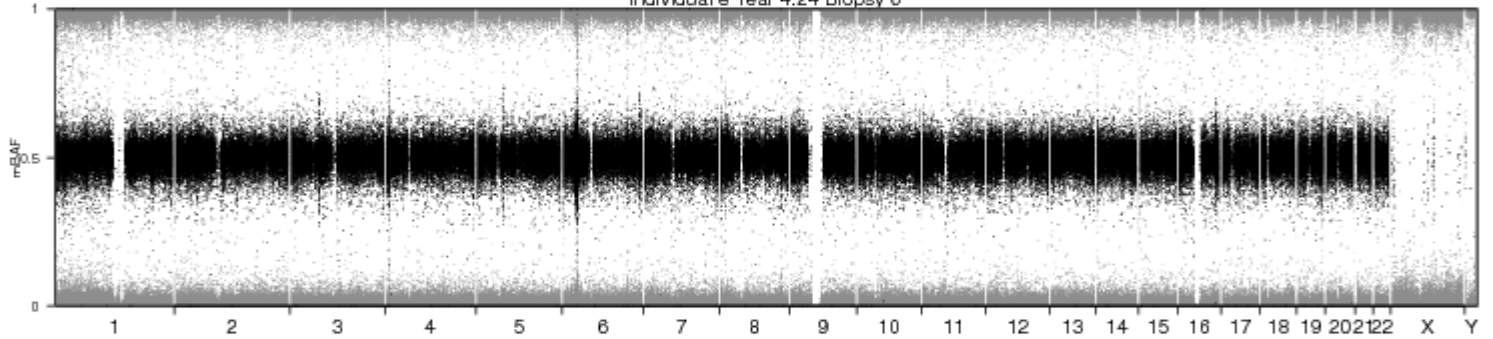

Individual e Year 4.24 Biopsy 6

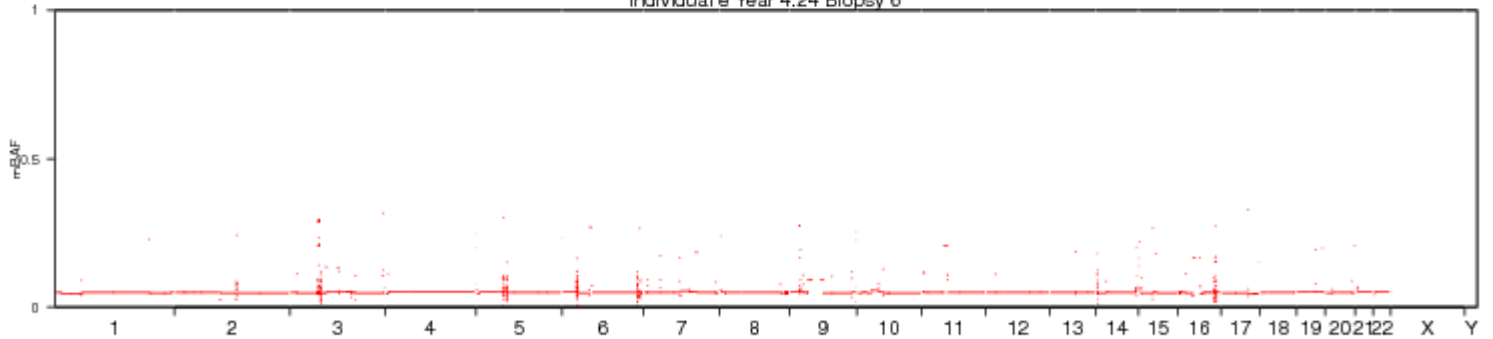

Individual e Year 4.24 Biopsy 6

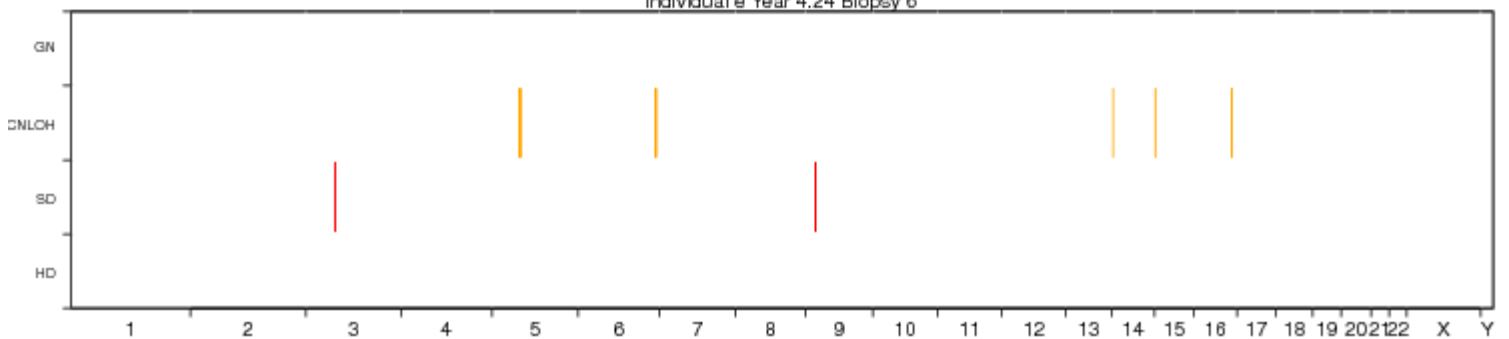

Individual e Year 7.09 Biopsy 7

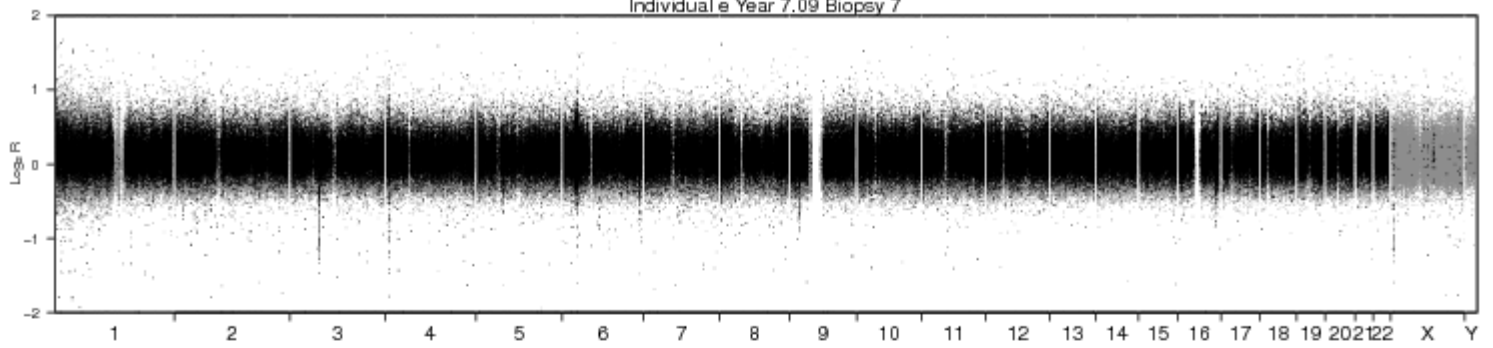

Individual e Year 7.09 Biopsy 7

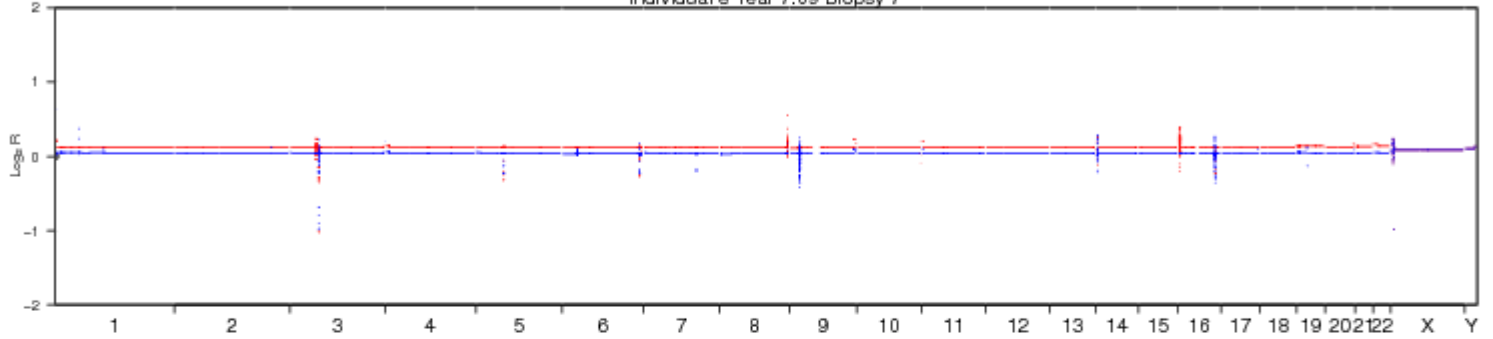

Individual e Year 7.09 Biopsy 7

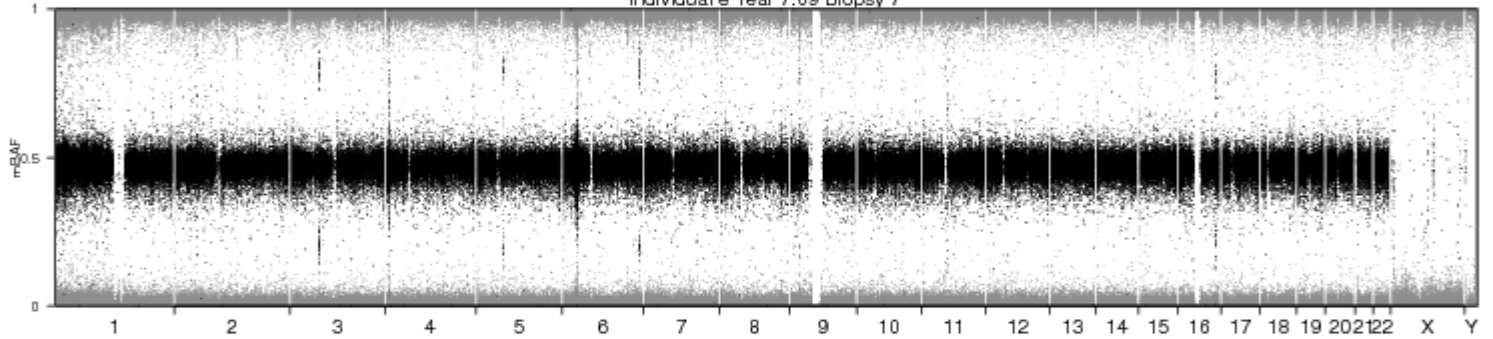

Individual e Year 7.09 Biopsy 7

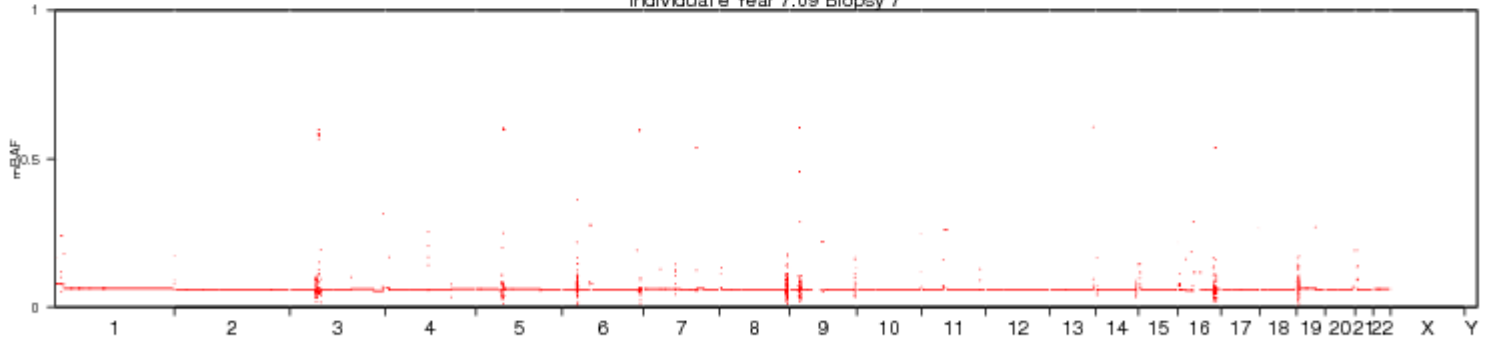

Individual e Year 7.09 Biopsy 7

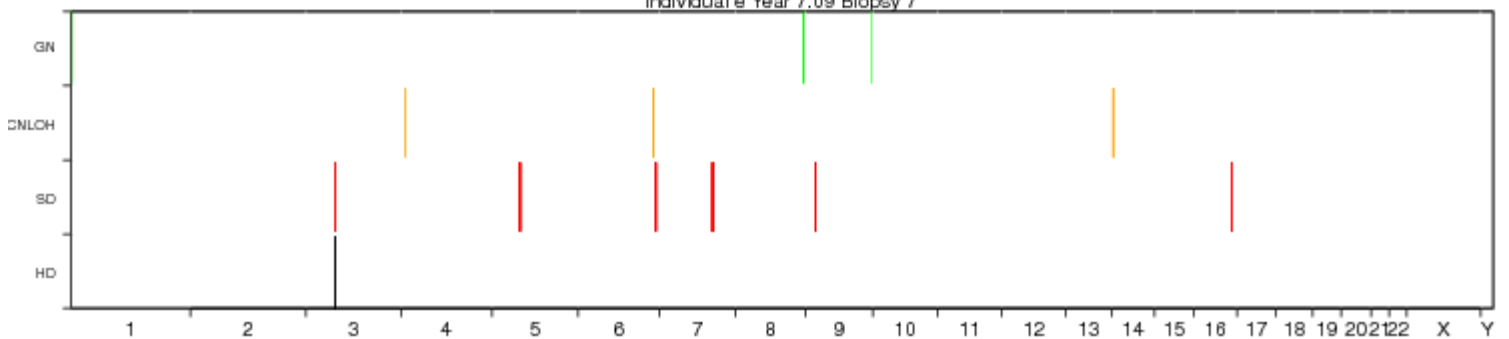



Individual e Year 7.09 Biopsy 8

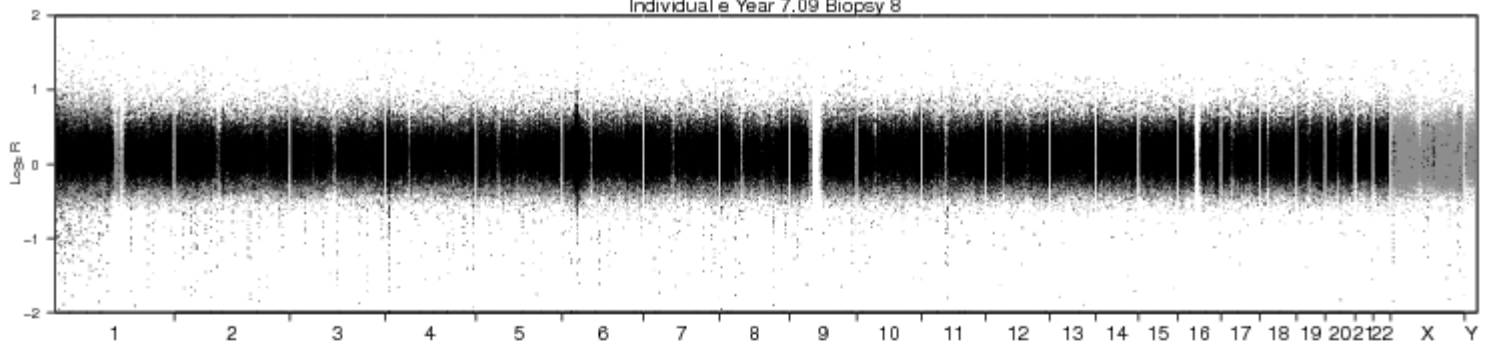

Individual e Year 7.09 Biopsy 8

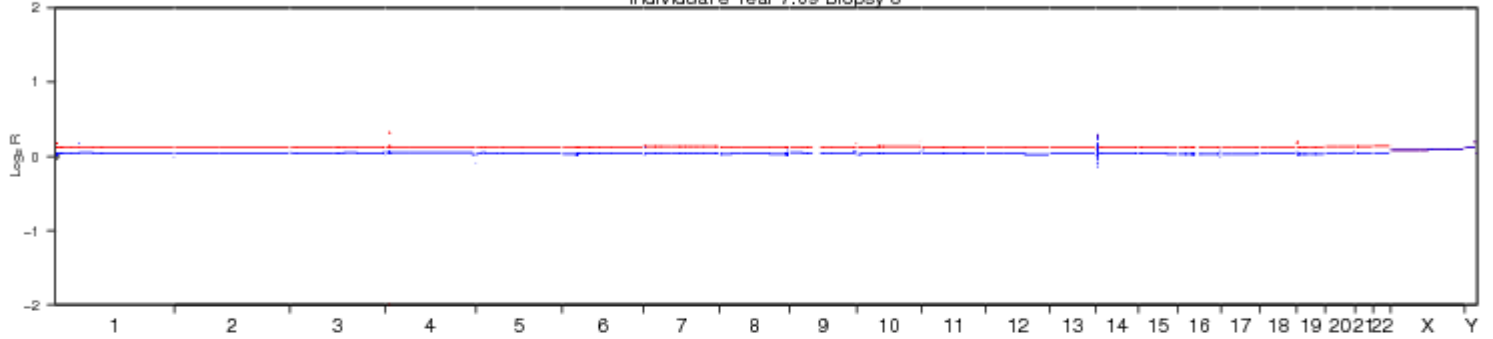

Individual e Year 7.09 Biopsy 8

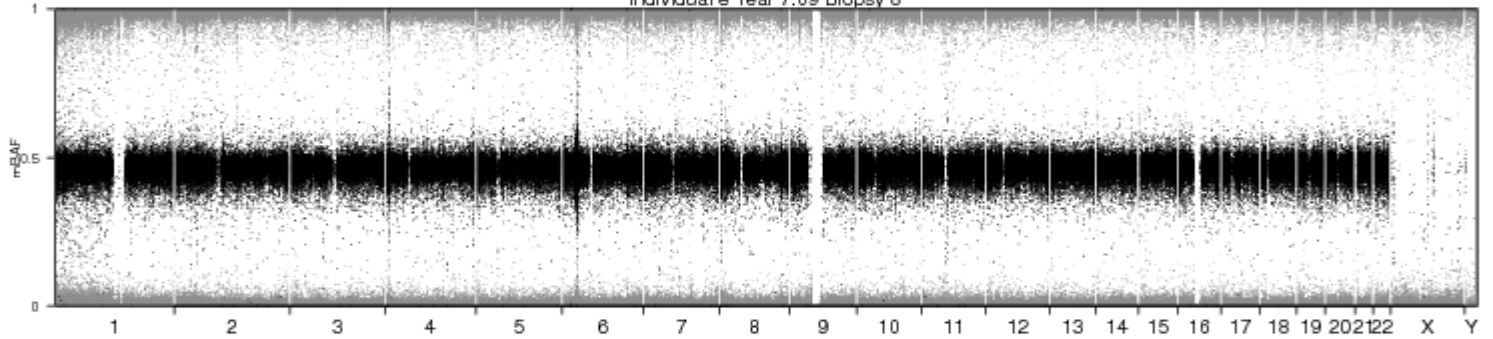

Individual e Year 7.09 Biopsy 8

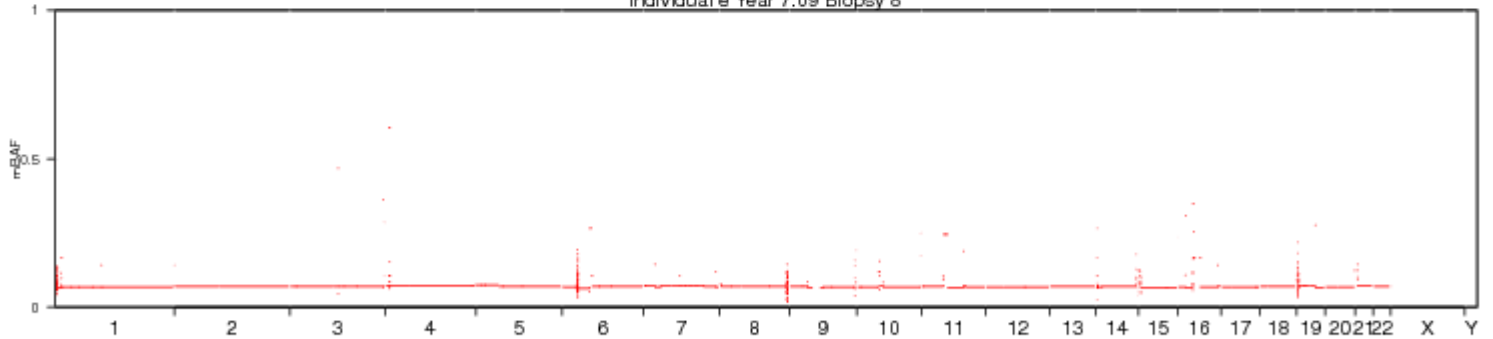

Individual e Year 7.09 Biopsy 8

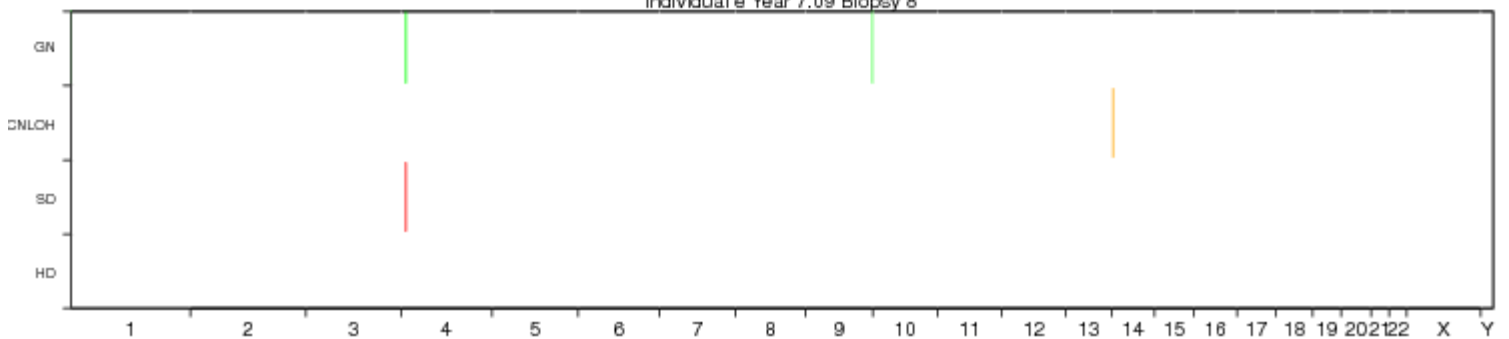

Individual e Year 10.76 Biopsy 9

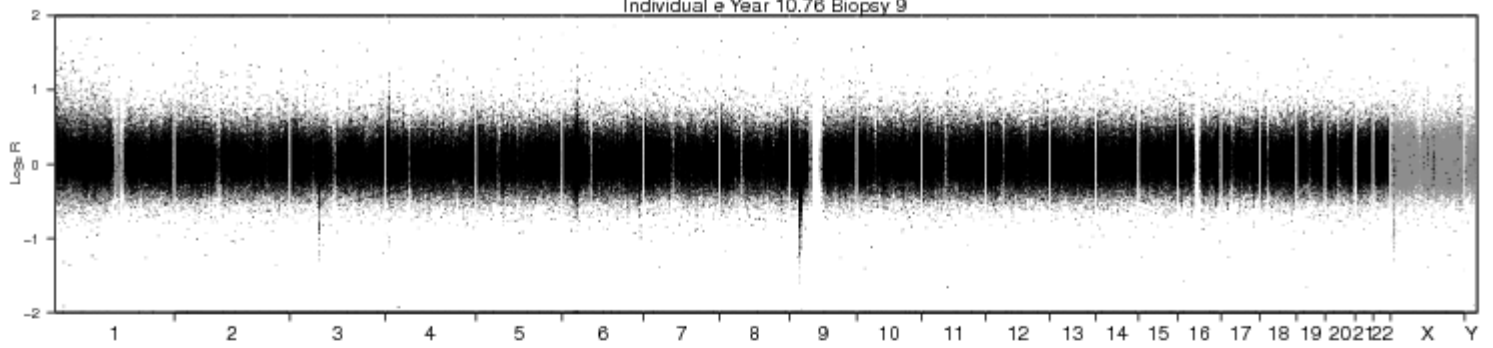

Individual e Year 10.76 Biopsy 9

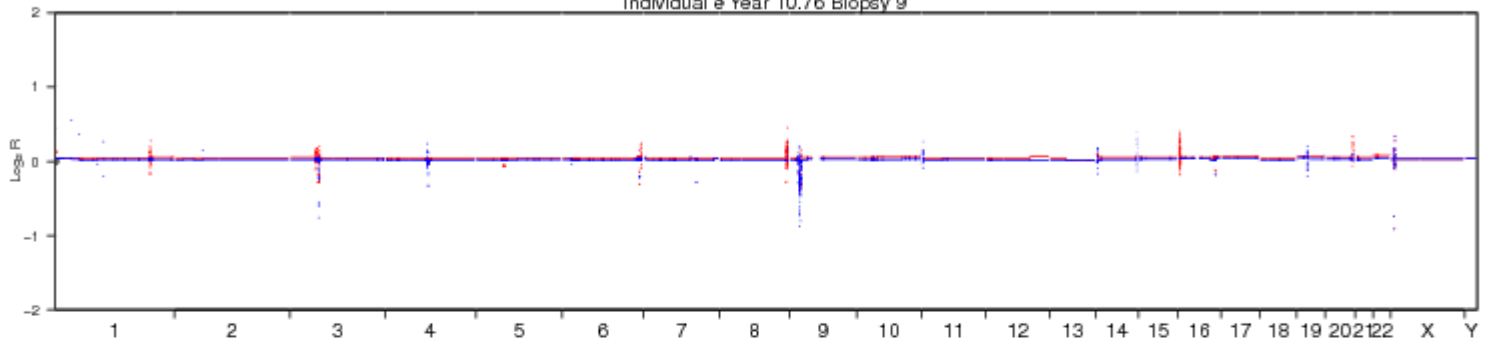

Individual e Year 10.76 Biopsy 9

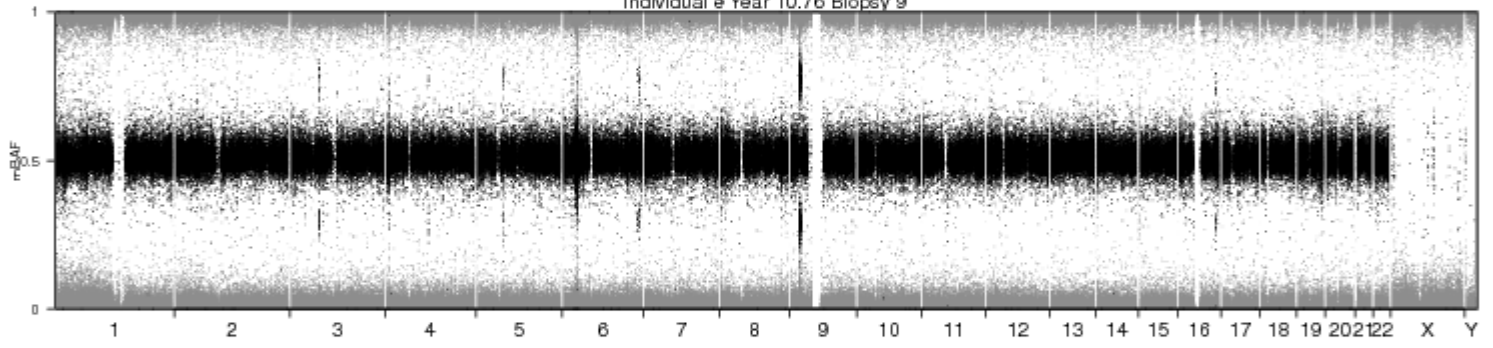

Individual e Year 10.76 Biopsy 9

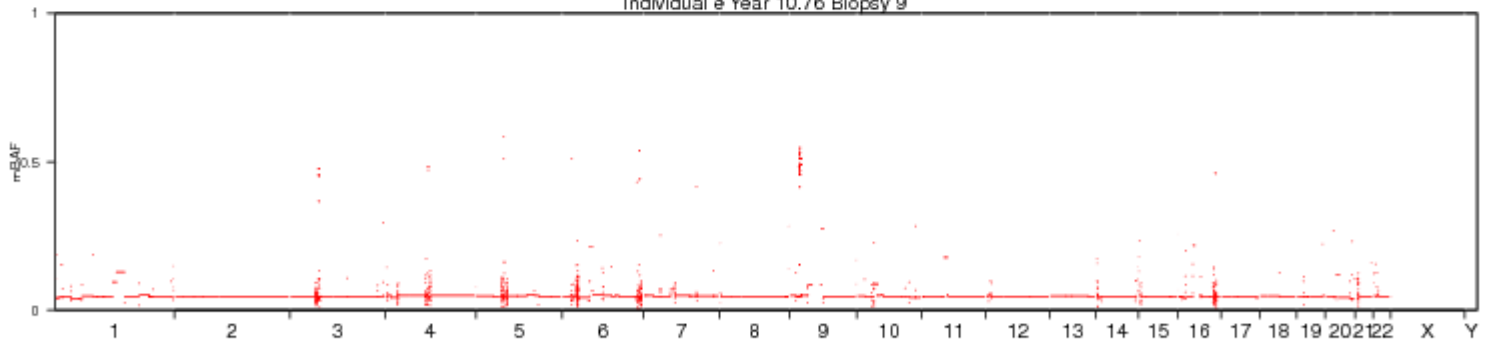

Individual e Year 10.76 Biopsy 9

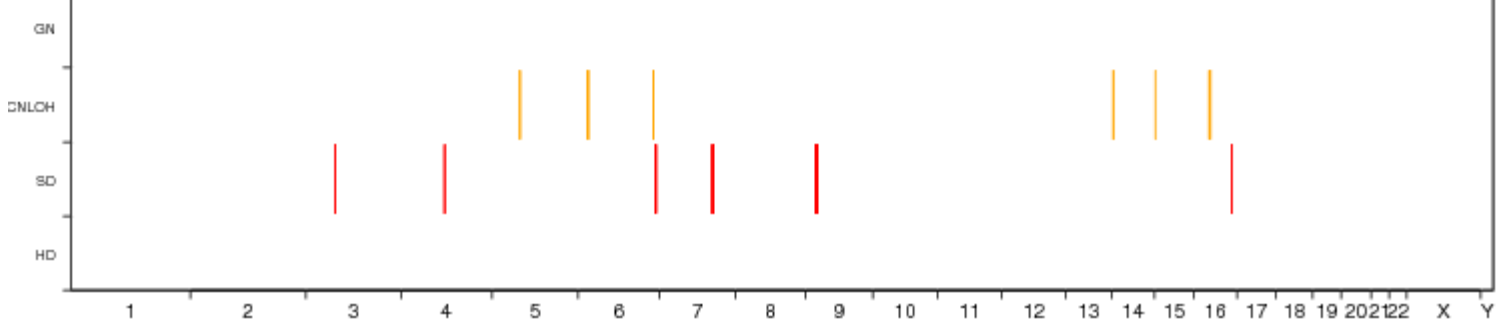

Individual e Year 10.76 Biopsy 10

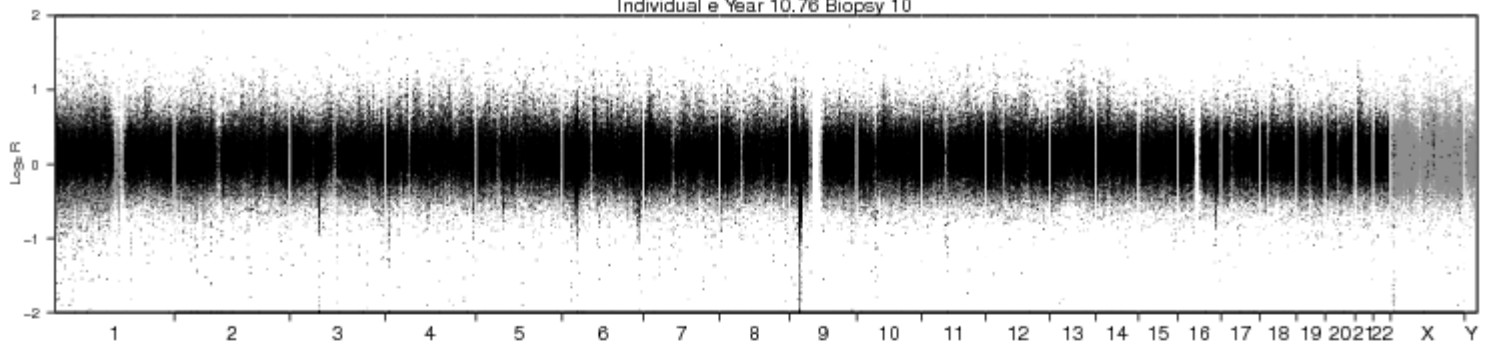

Individual e Year 10.76 Biopsy 10

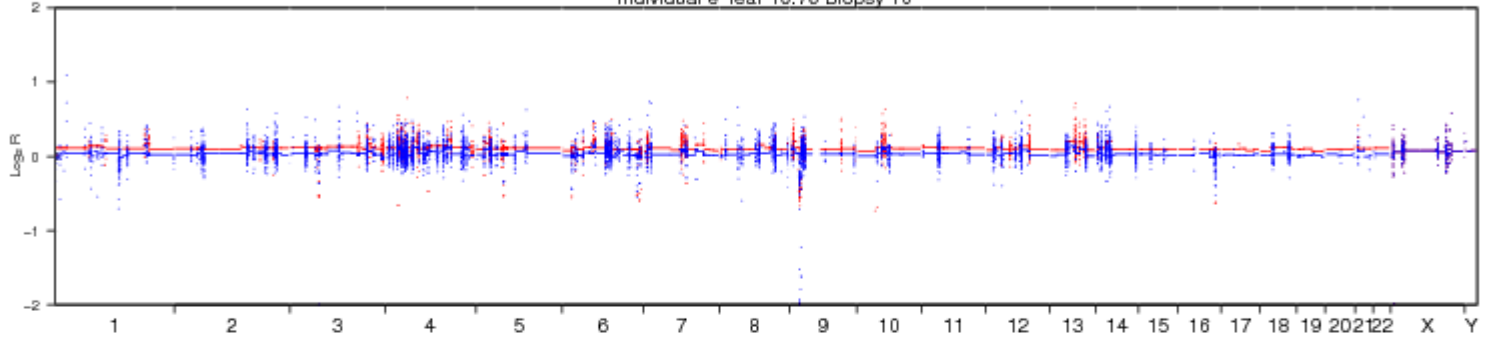

Individual e Year 10.76 Biopsy 10

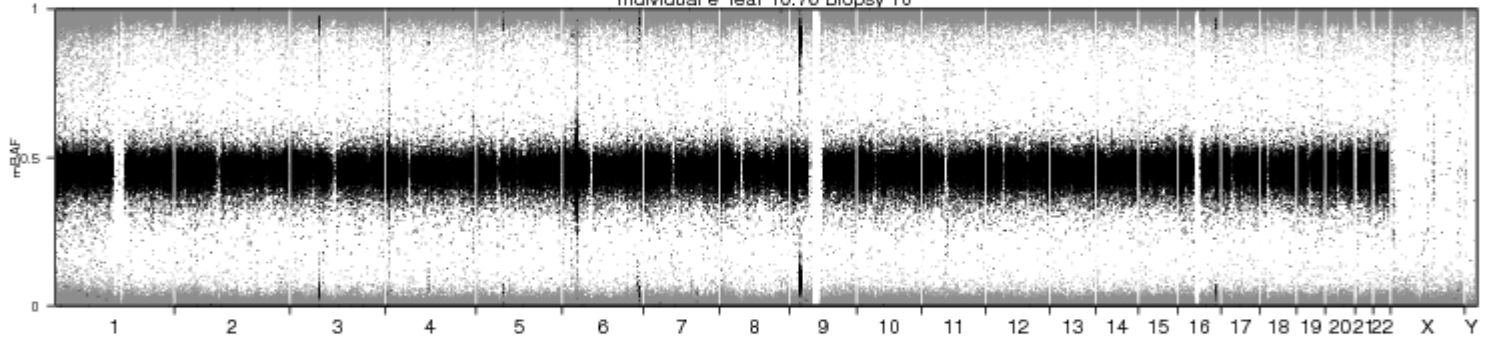

Individual e Year 10.76 Biopsy 10

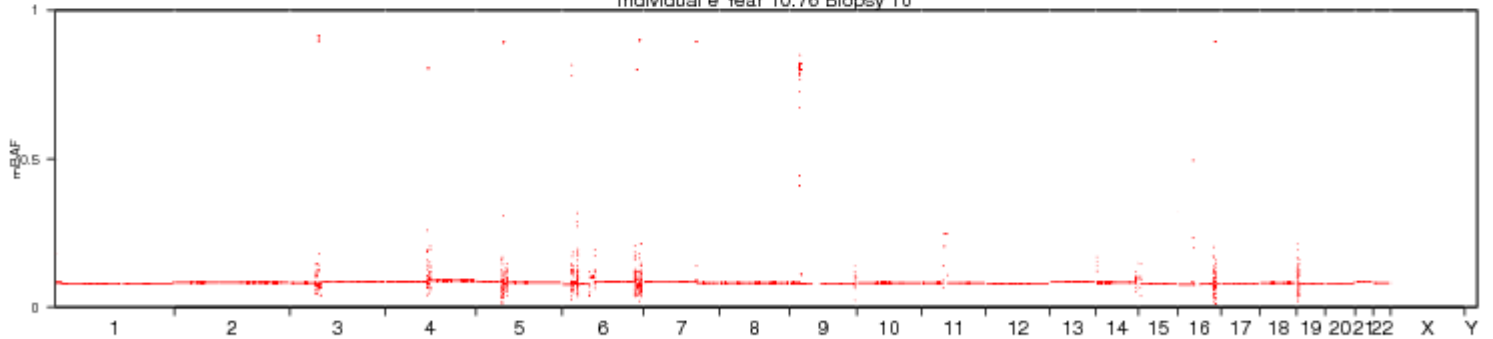

Individual e Year 10.76 Biopsy 10

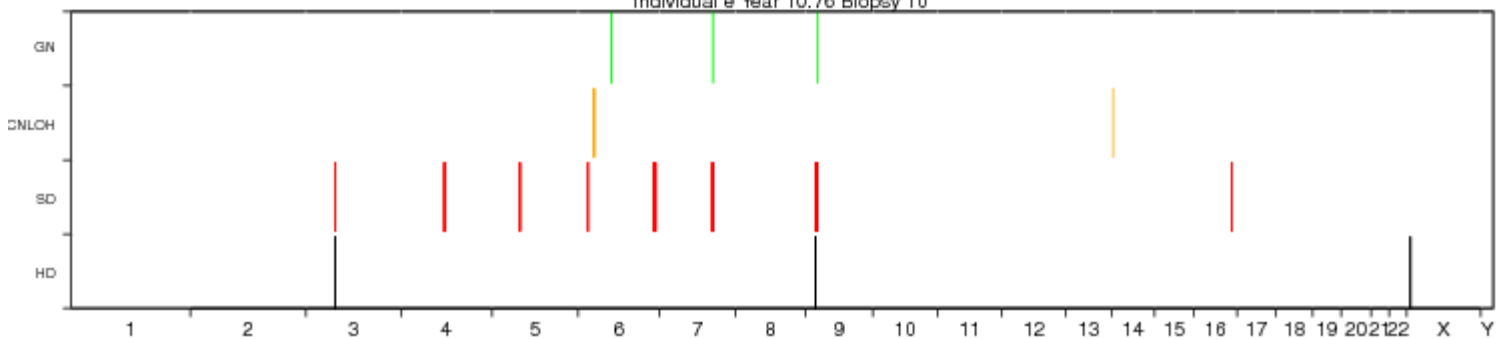

Individual e Year 13.68 Biopsy 11

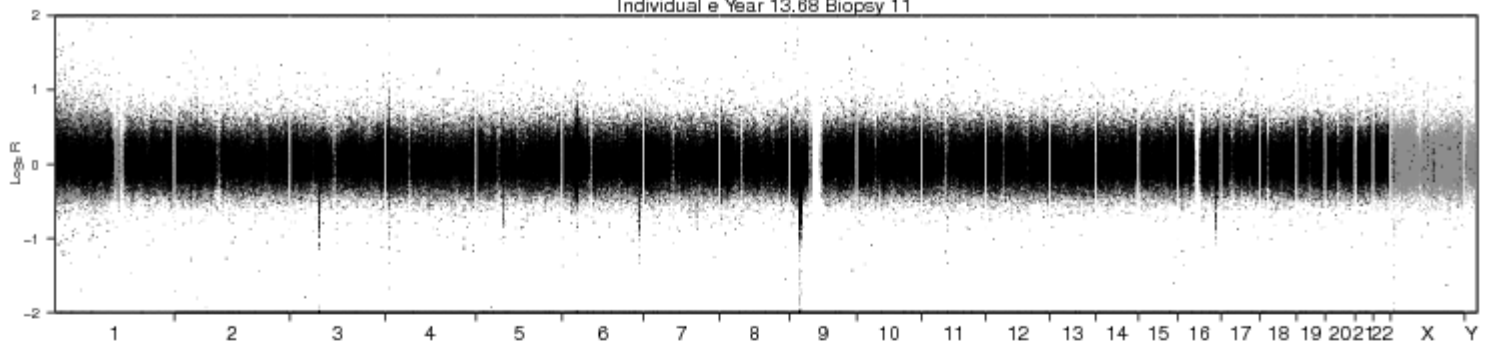

Individual e Year 13.68 Biopsy 11

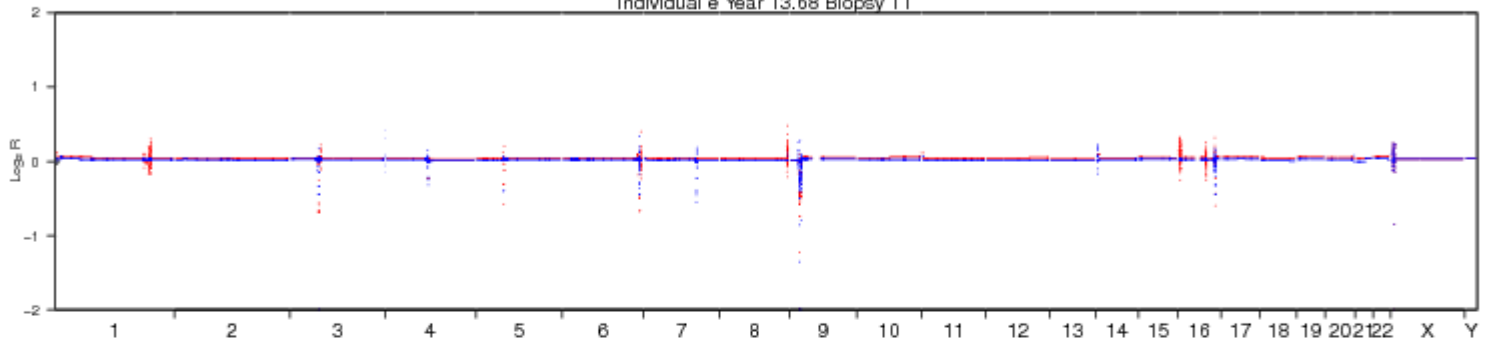

Individual e Year 13.68 Biopsy 11

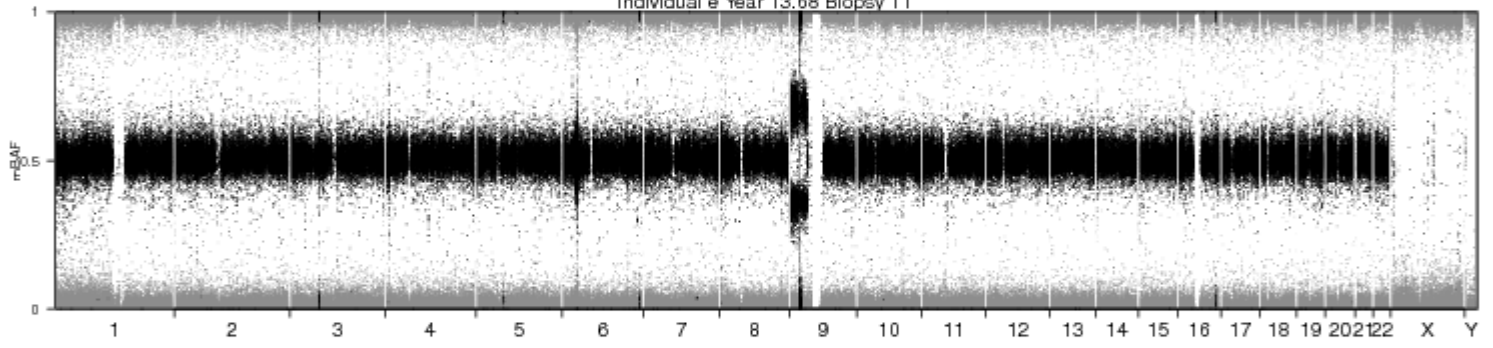

Individual e Year 13.68 Biopsy 11

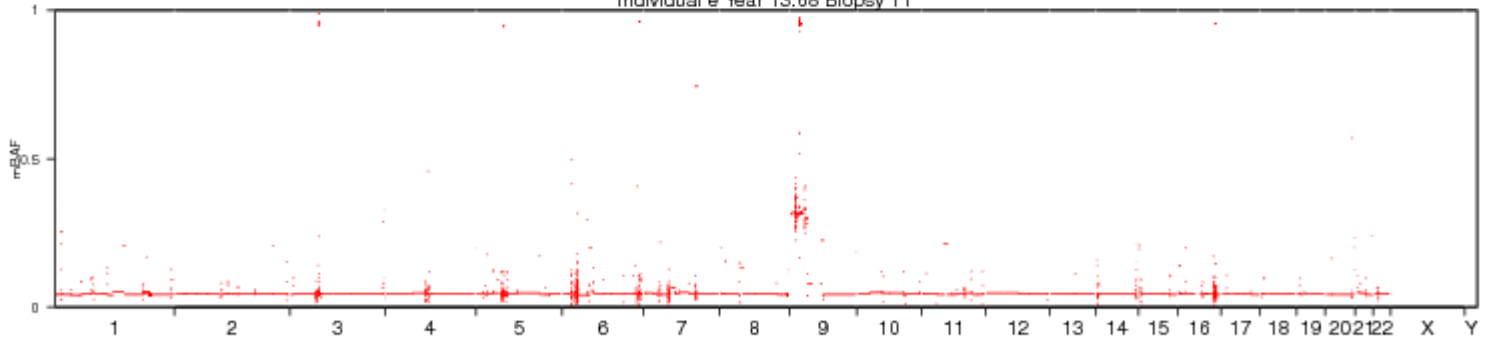

Individual e Year 13.68 Biopsy 11

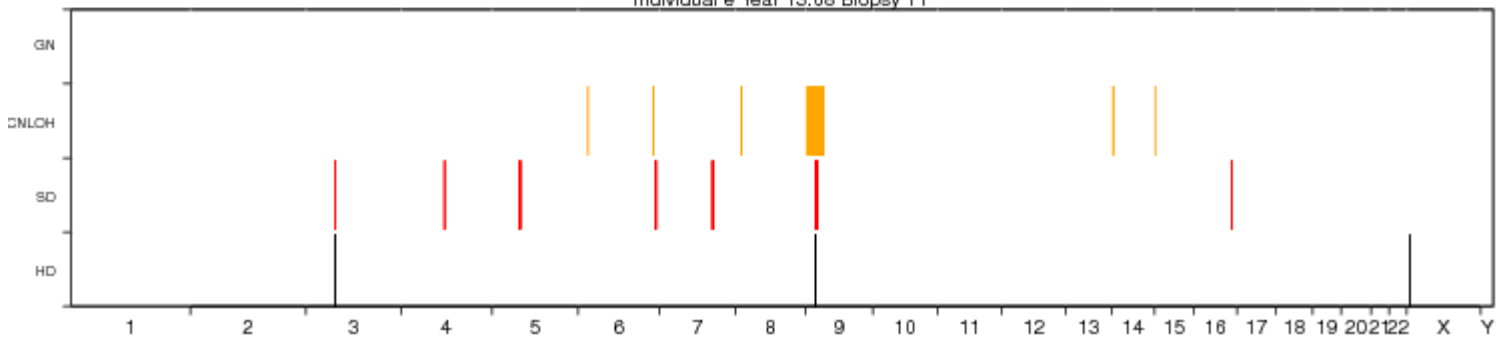



Individual e Year 13.68 Biopsy 12

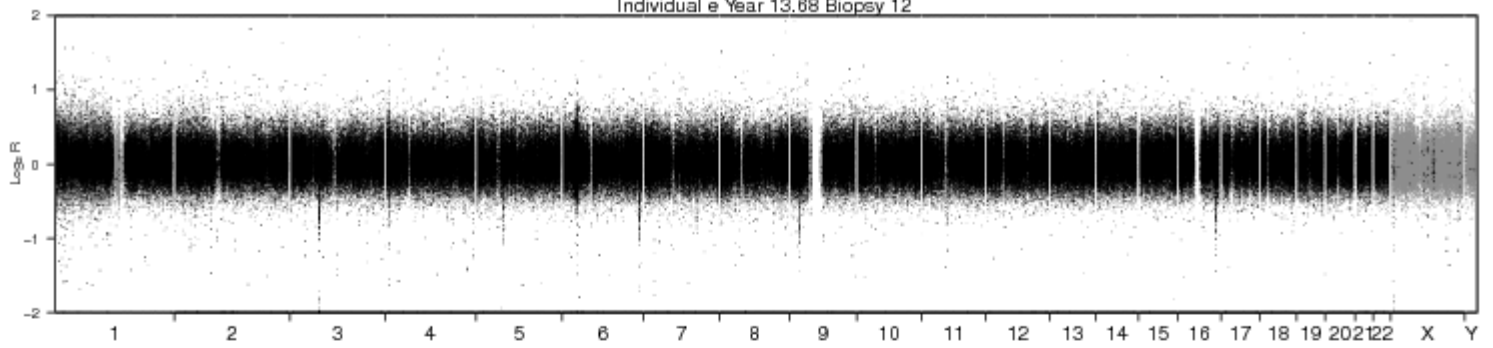

Individual e Year 13.68 Biopsy 12

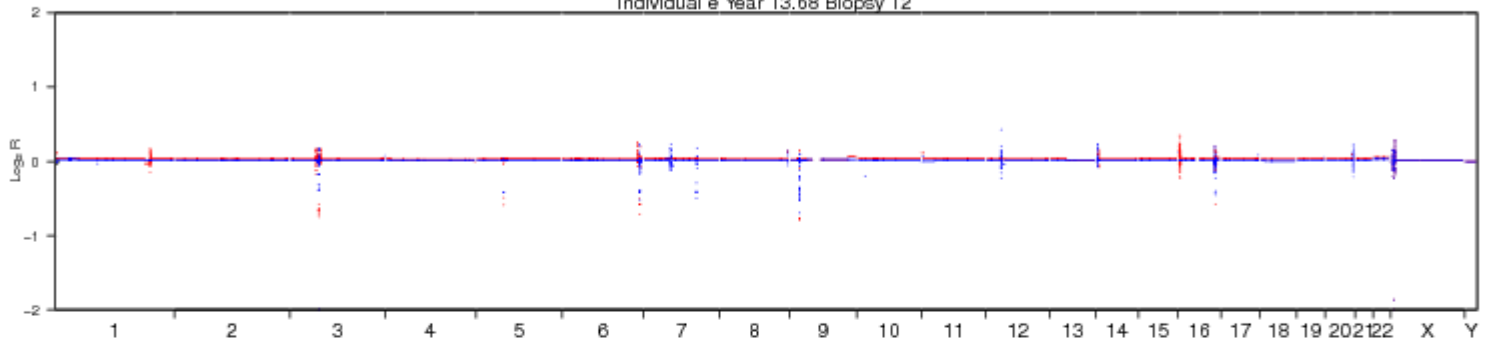

Individual e Year 13.68 Biopsy 12

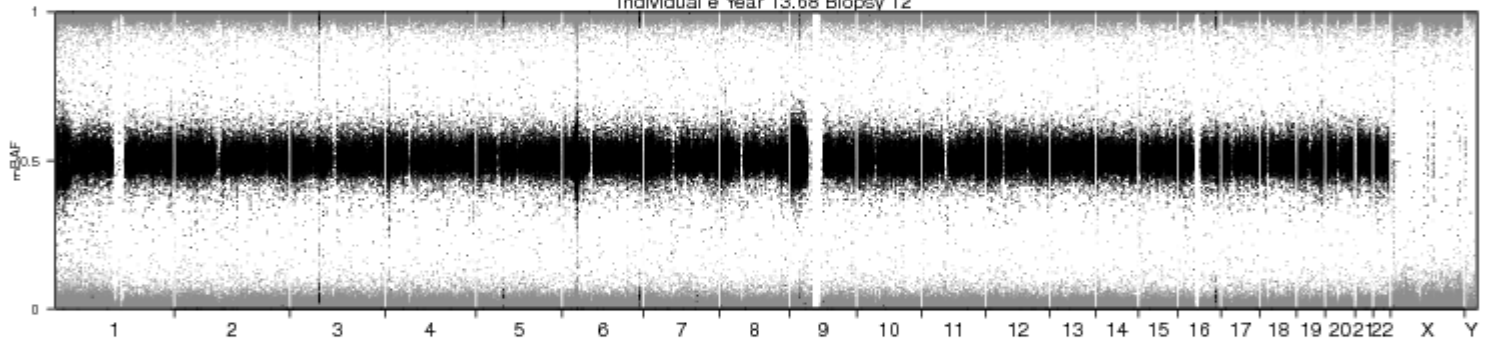

Individual e Year 13.68 Biopsy 12

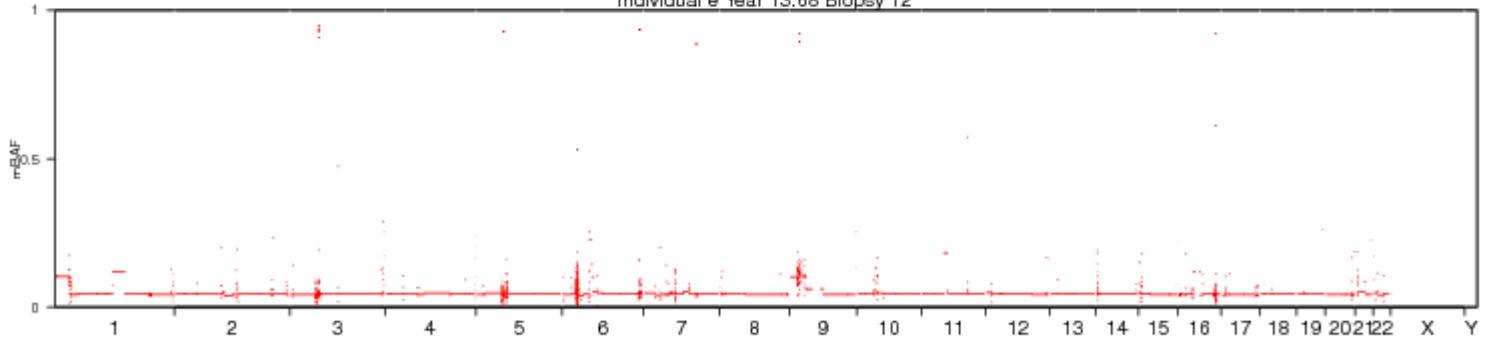

Individual e Year 13.68 Biopsy 12

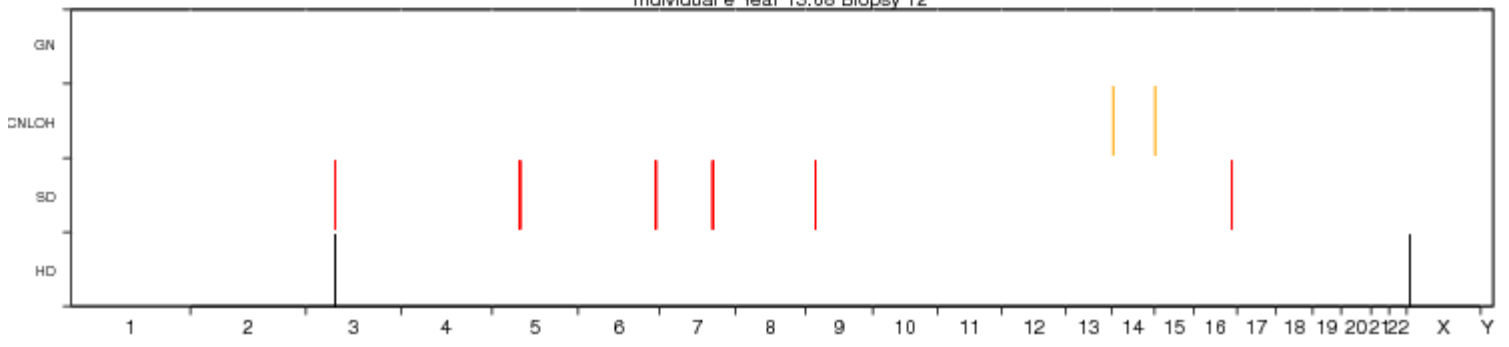

Individual f Year 0 Biopsy 1

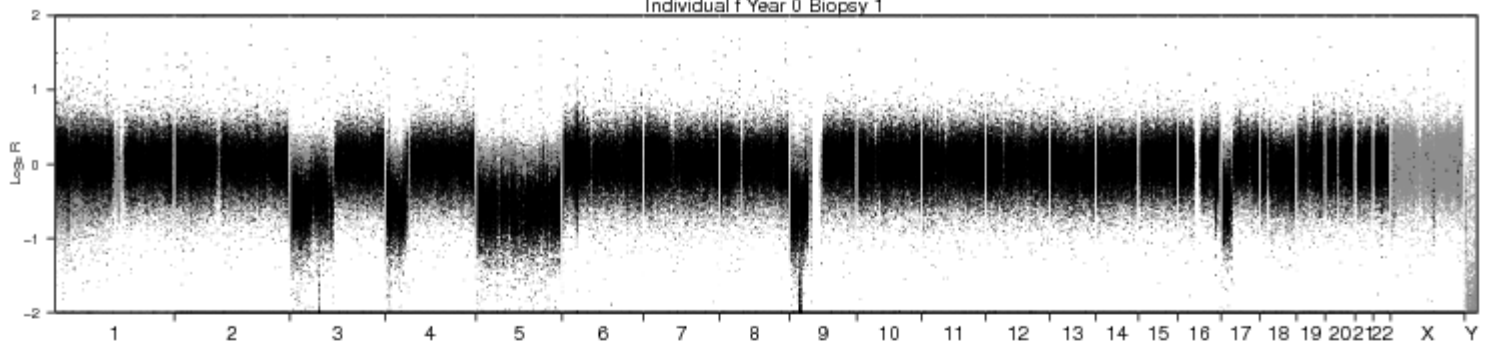

Individual f Year 0 Biopsy 1

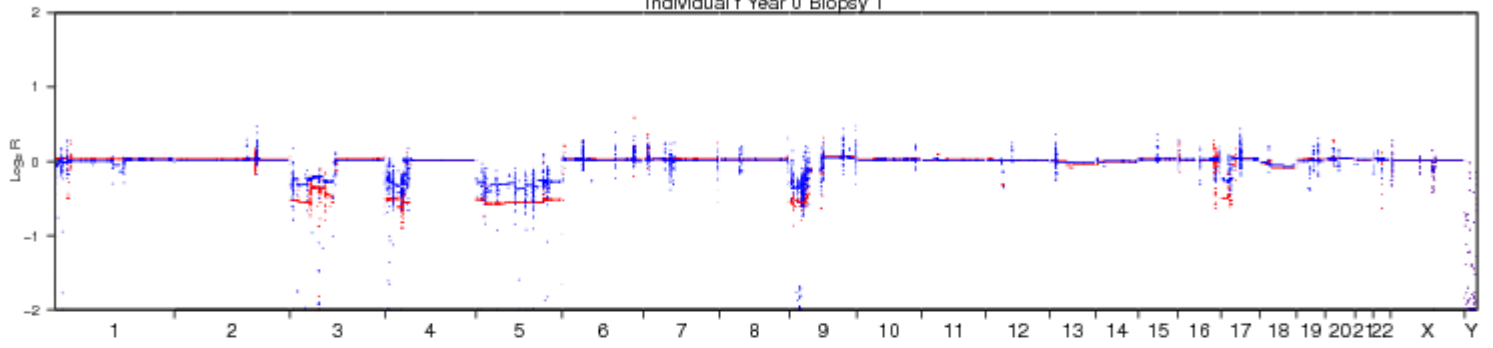

Individual f Year 0 Biopsy 1

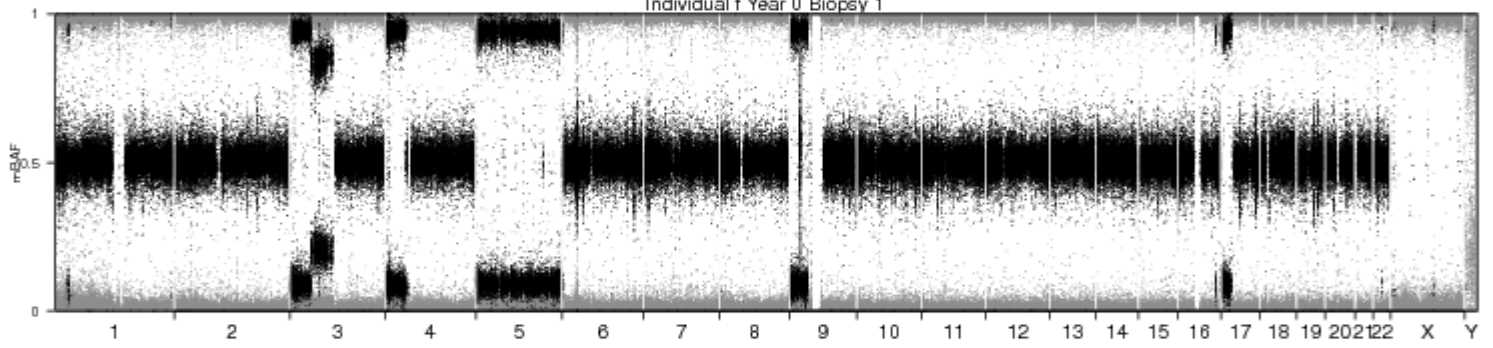

Individual f Year 0 Biopsy 1

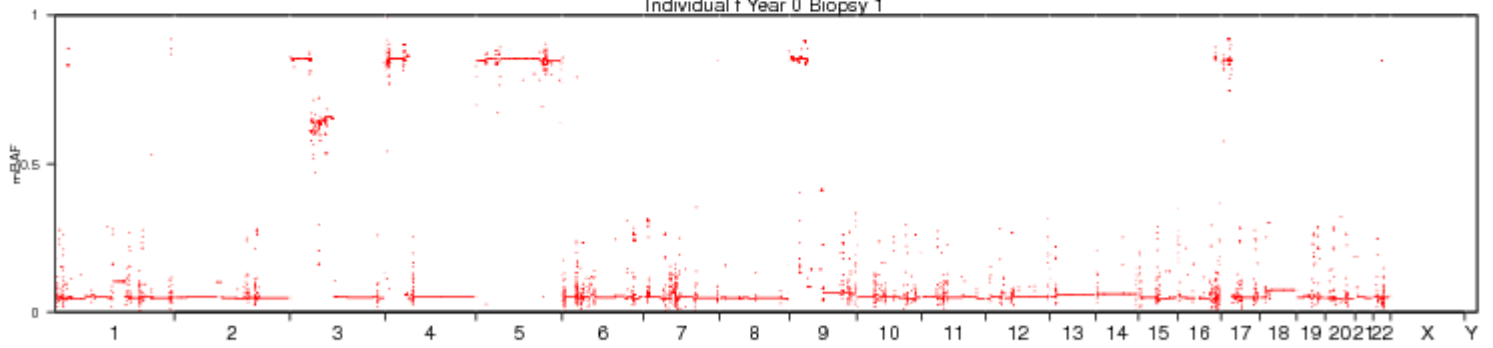

Individual f Year 0 Biopsy 1

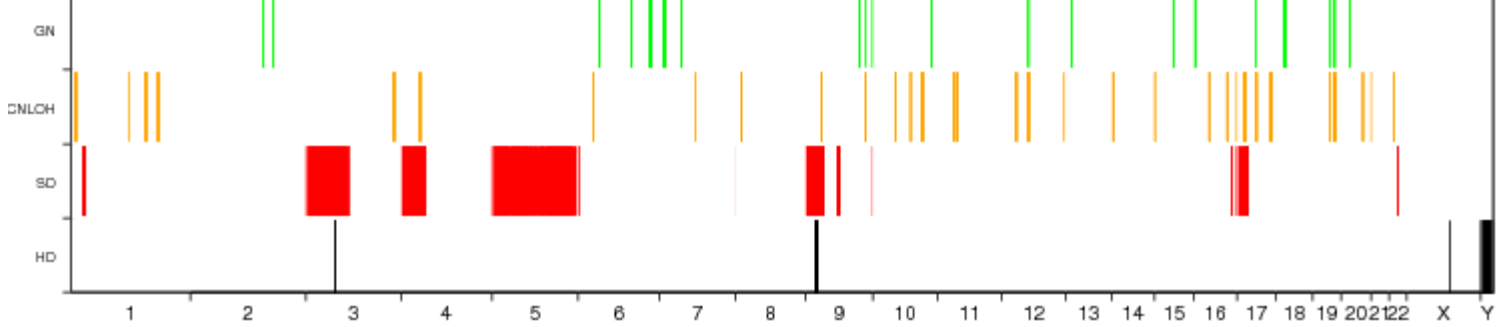

Individual f Year 0 Biopsy 2

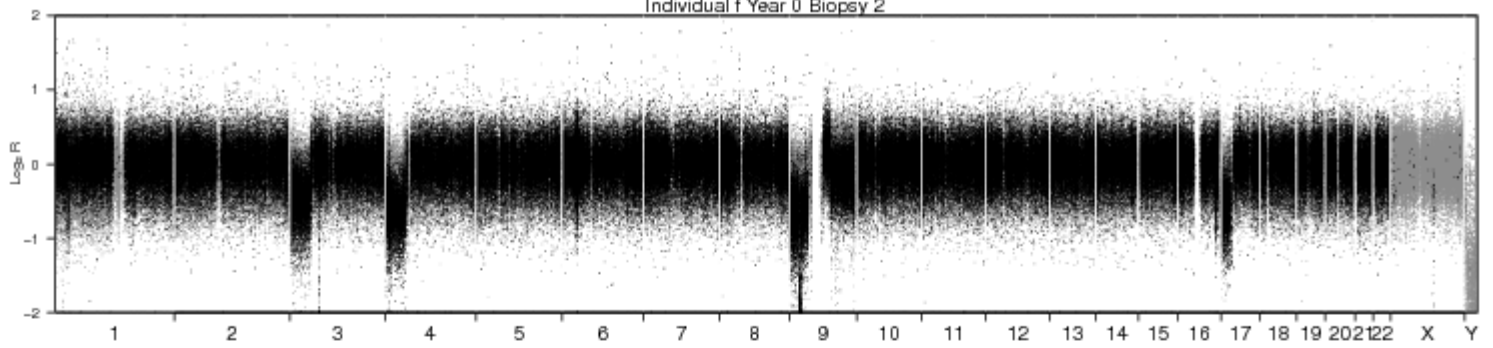

Individual f Year 0 Biopsy 2

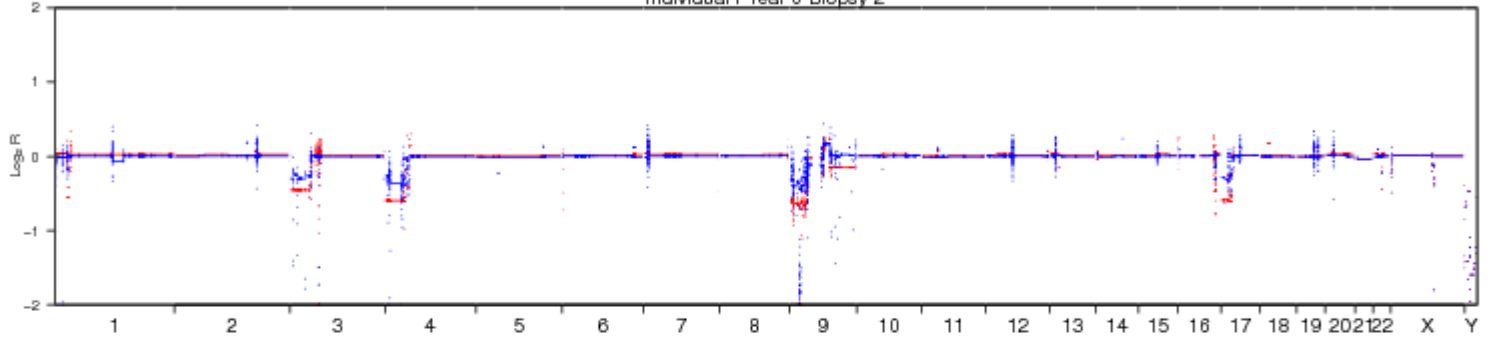

Individual f Year 0 Biopsy 2

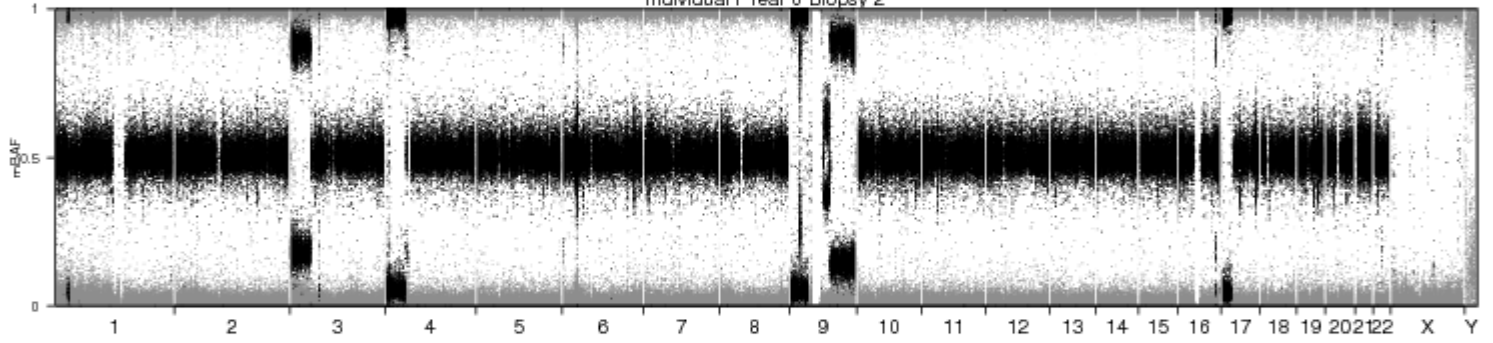

Individual f Year 0 Biopsy 2

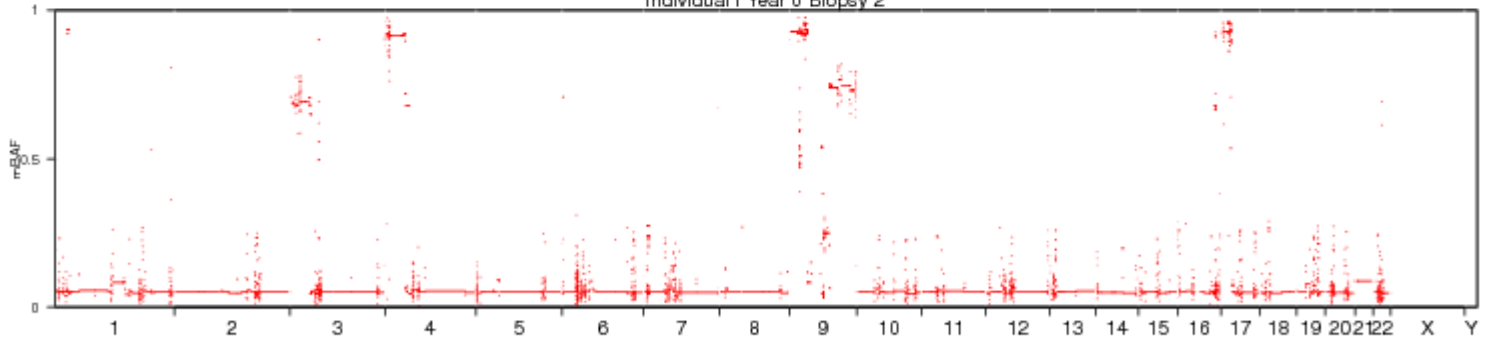

Individual f Year 0 Biopsy 2

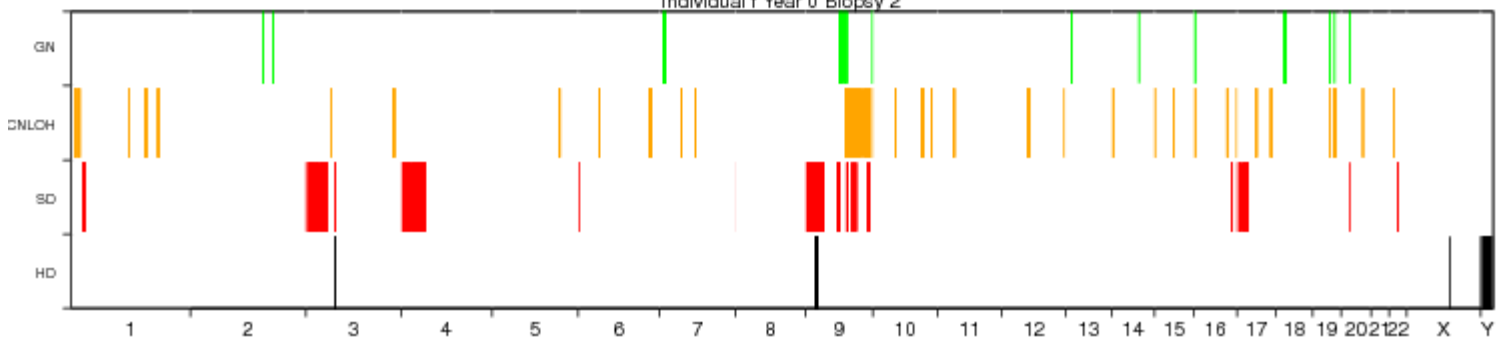

Individual f Year 0 Biopsy 3

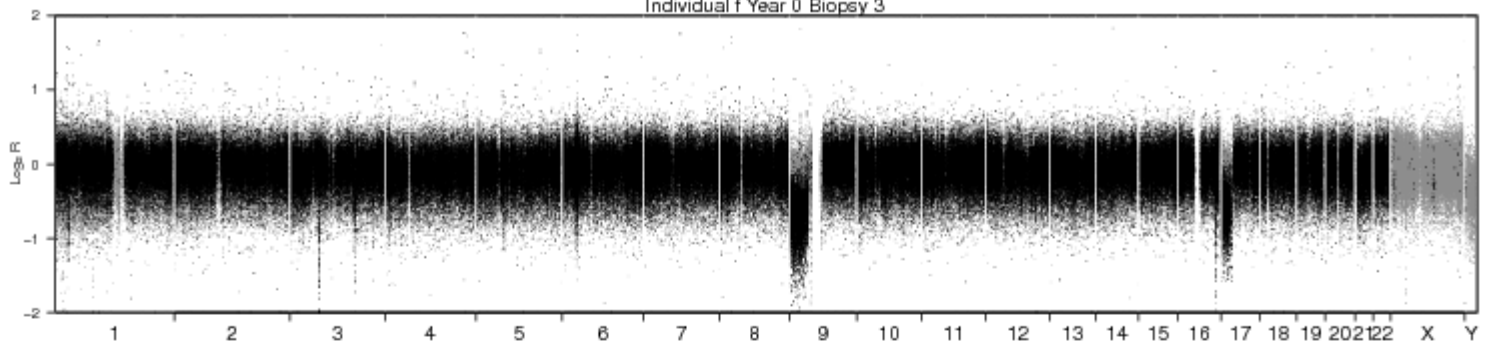

Individual f Year 0 Biopsy 3

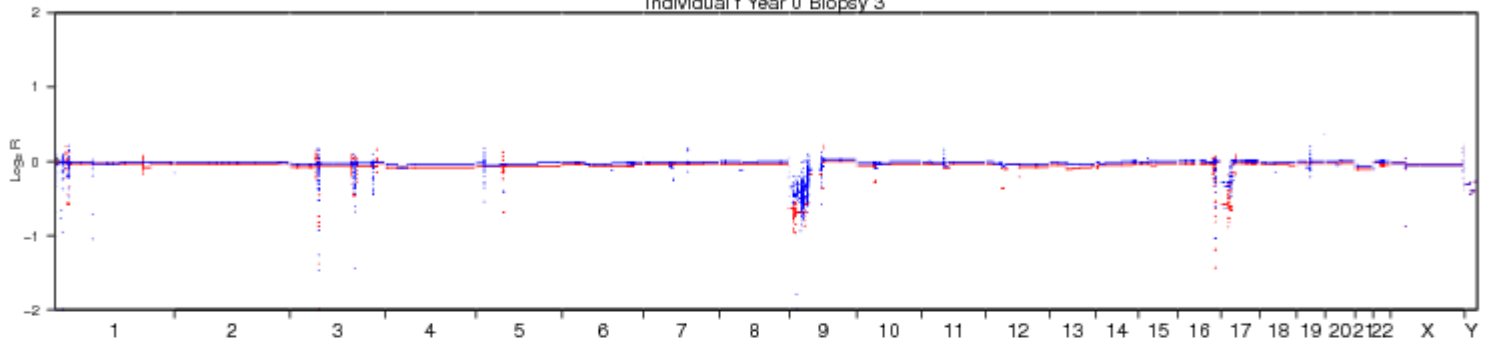

Individual f Year 0 Biopsy 3

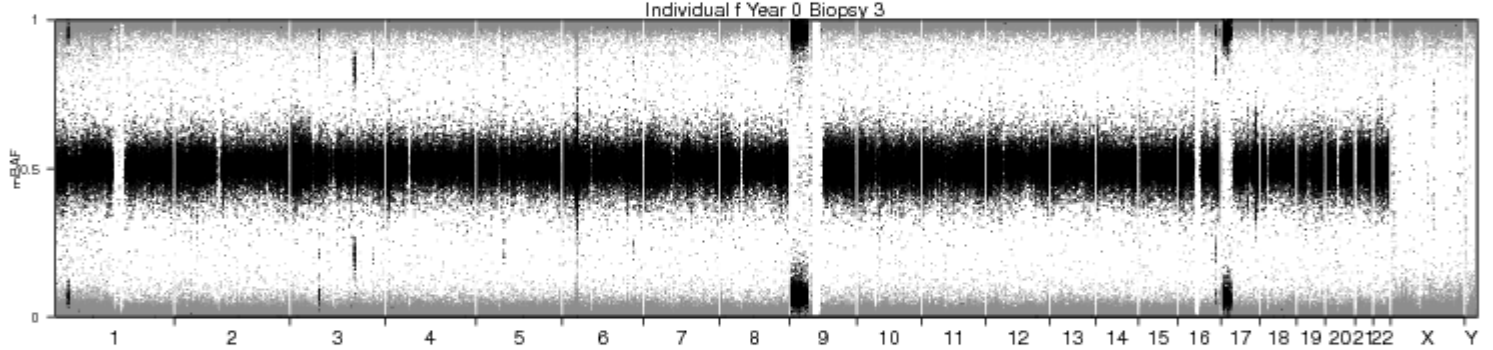

Individual f Year 0 Biopsy 3

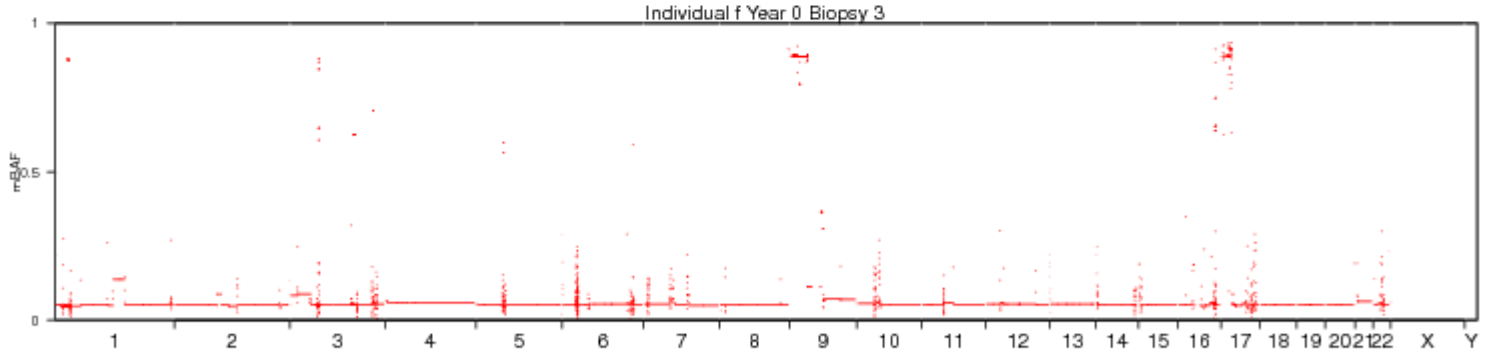

Individual f Year 0 Biopsy 3

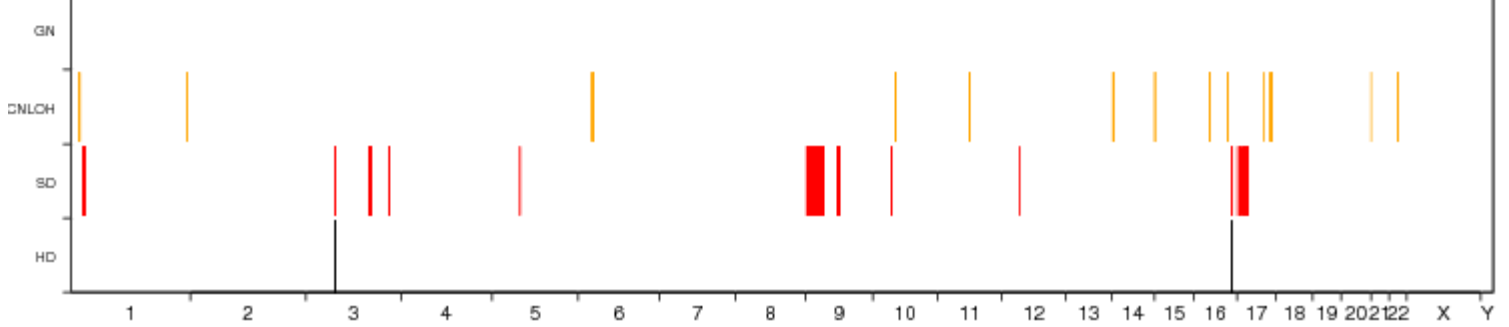



Individual f Year 0 Biopsy 4

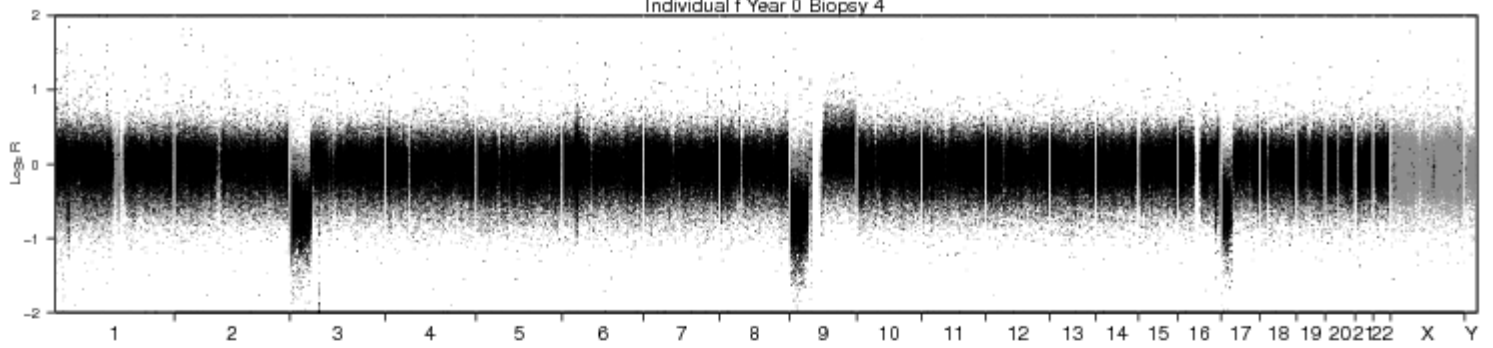

Individual f Year 0 Biopsy 4

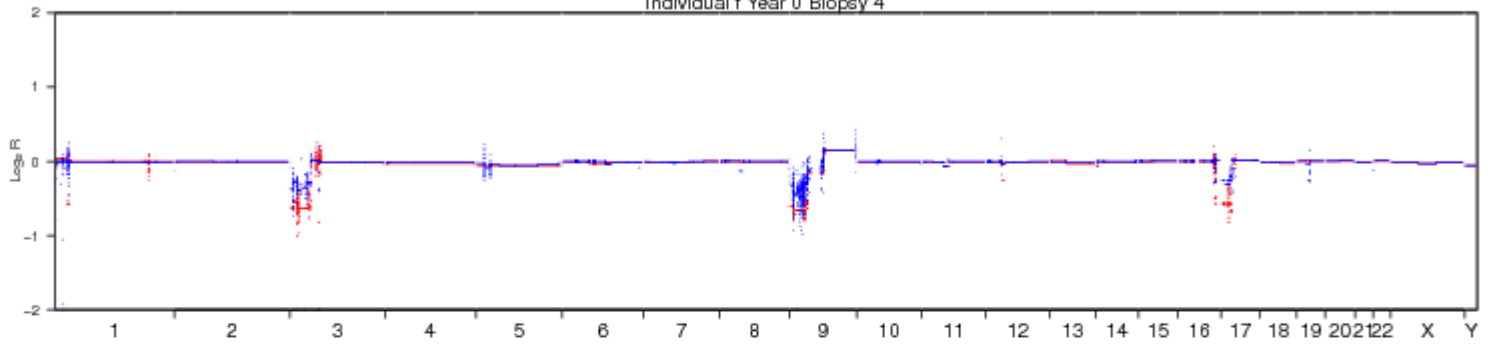

Individual f Year 0 Biopsy 4

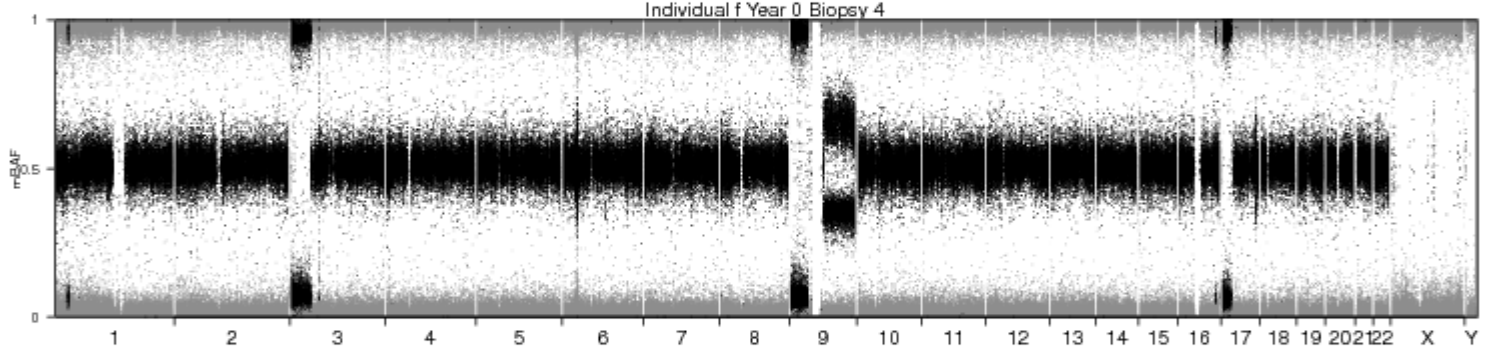

Individual f Year 0 Biopsy 4

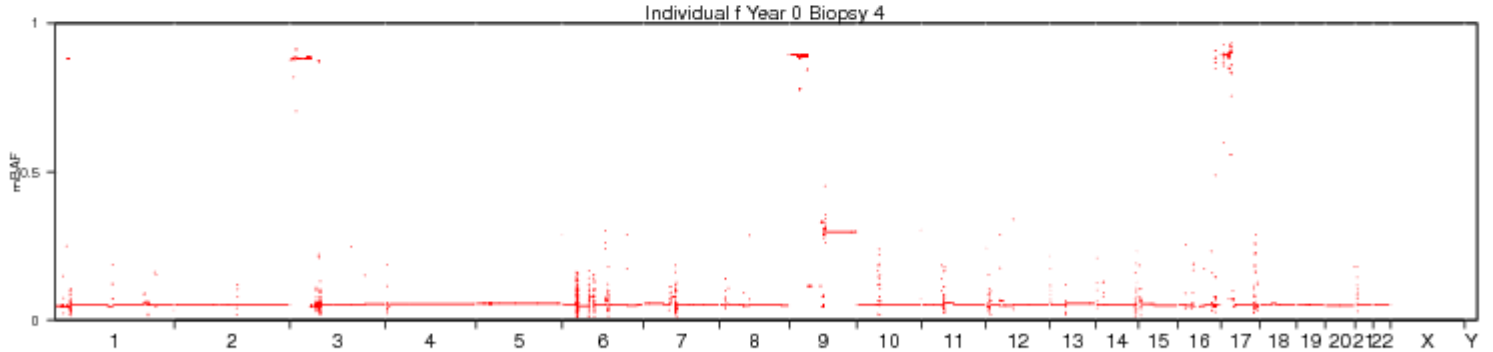

Individual f Year 0 Biopsy 4

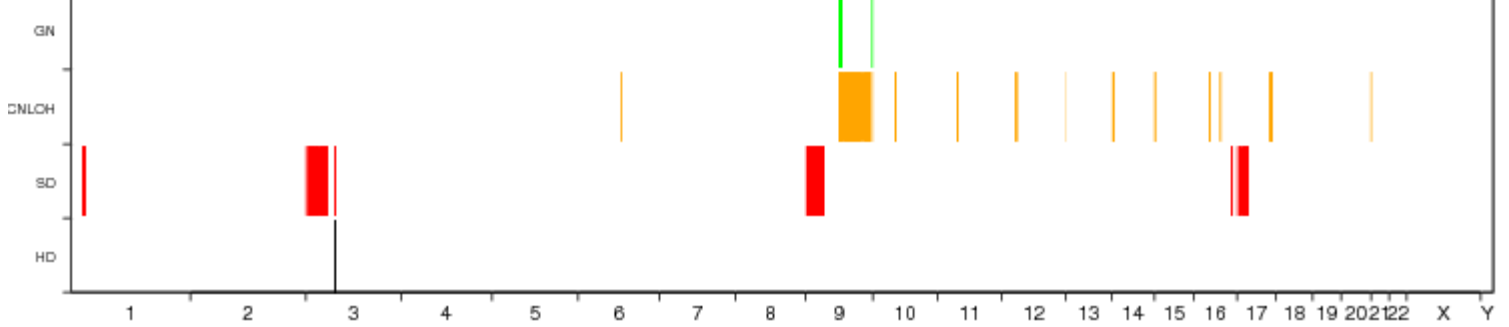

Individual f Year 0 Biopsy 5

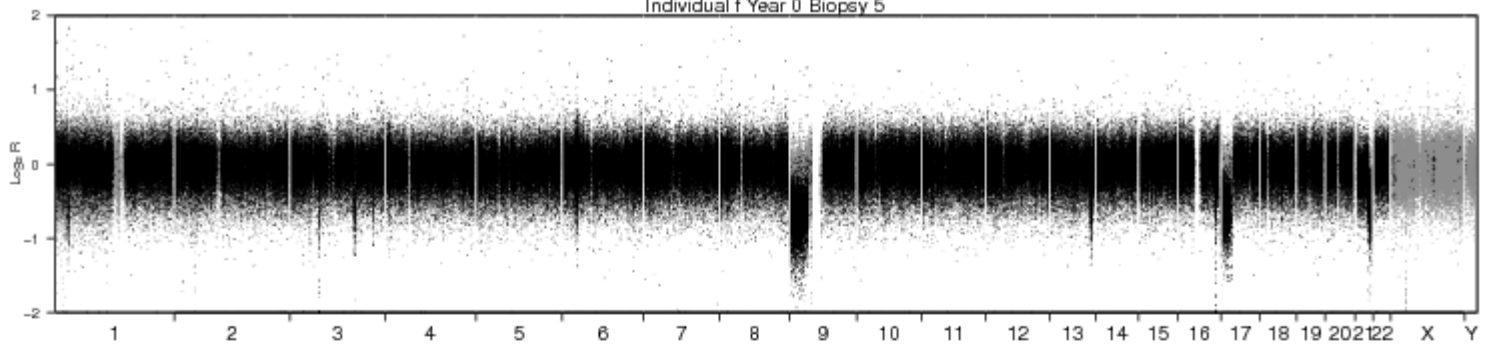

Individual f Year 0 Biopsy 5

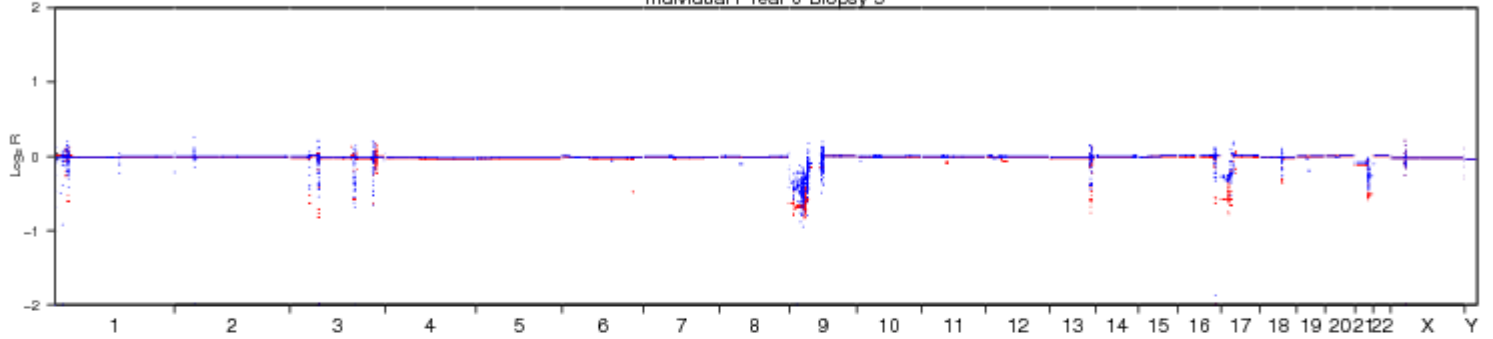

Individual f Year 0 Biopsy 5

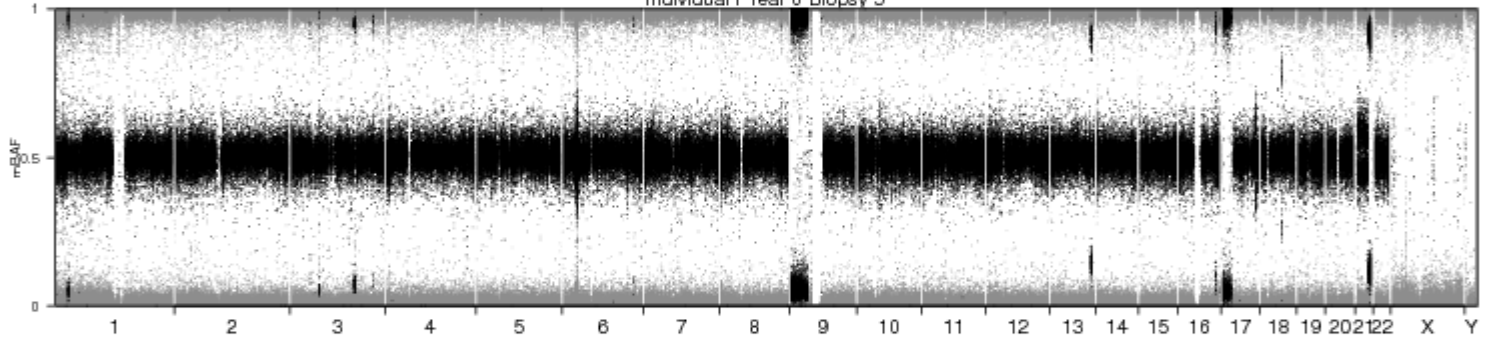

Individual f Year 0 Biopsy 5

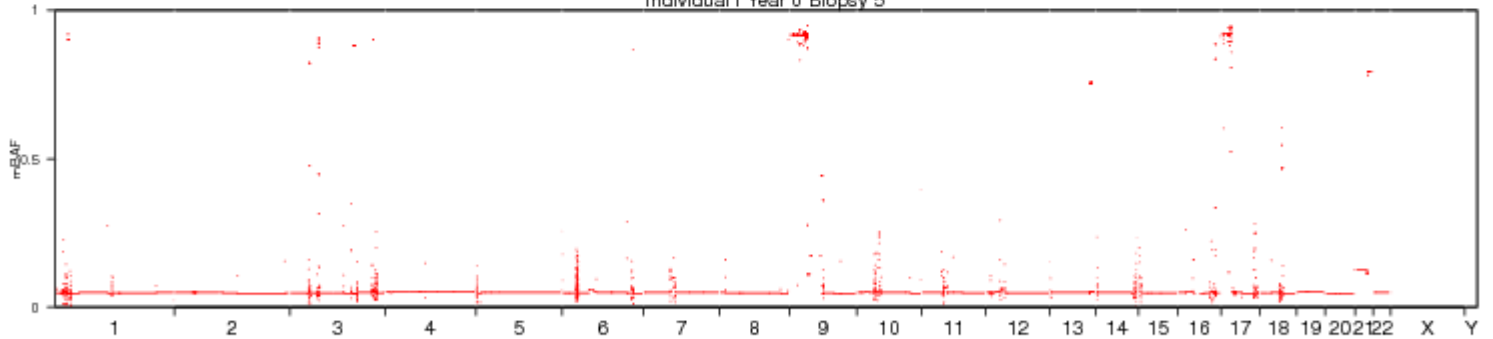

Individual f Year 0 Biopsy 5

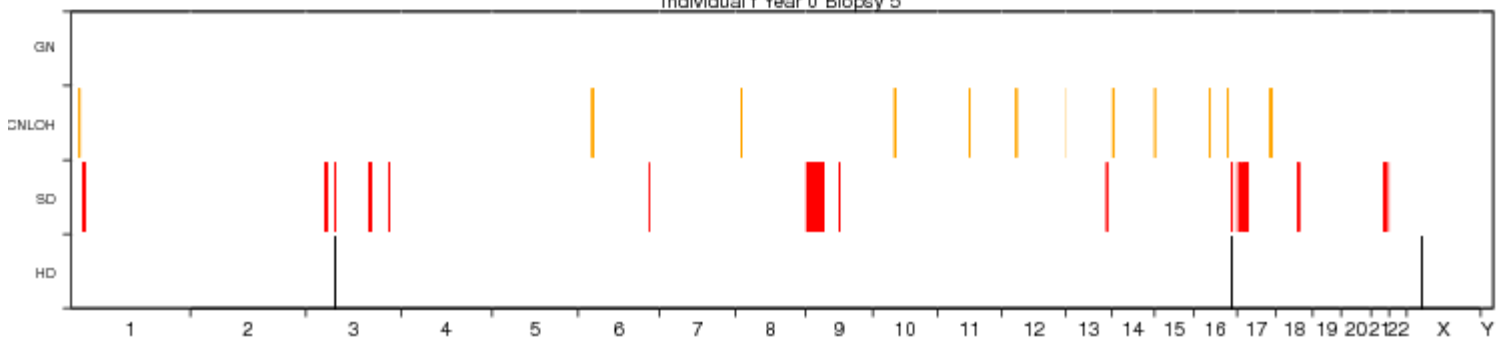

Individual f Year 0.17 Biopsy 6

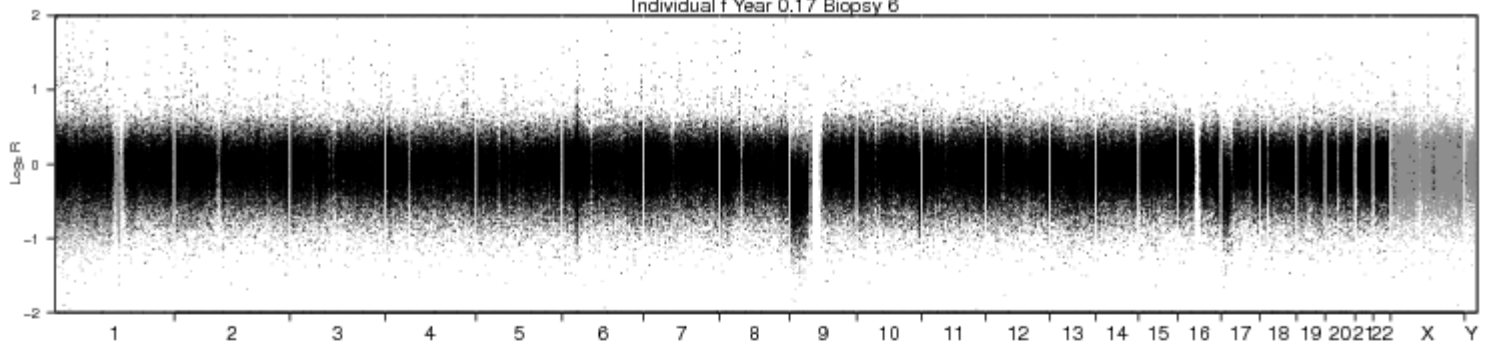

Individual f Year 0.17 Biopsy 6

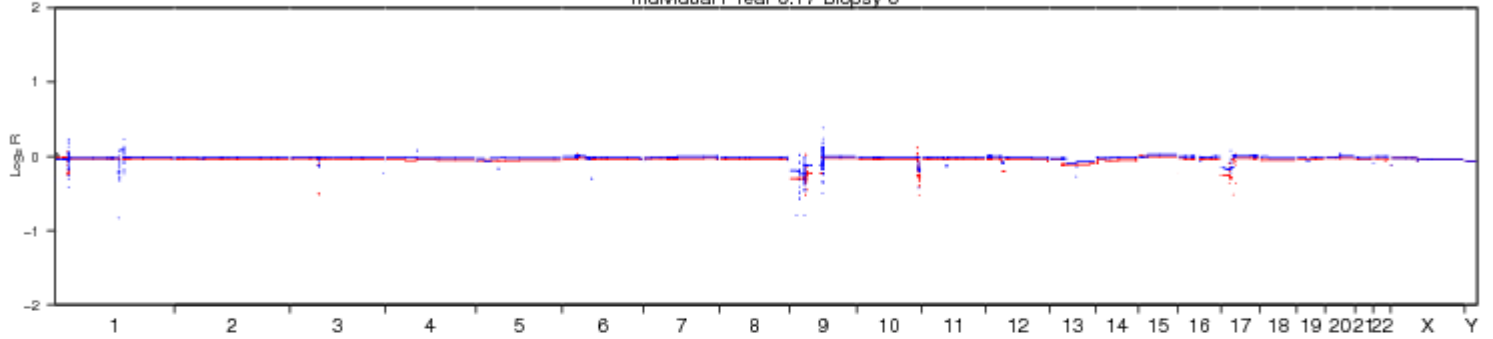

Individual f Year 0.17 Biopsy 6

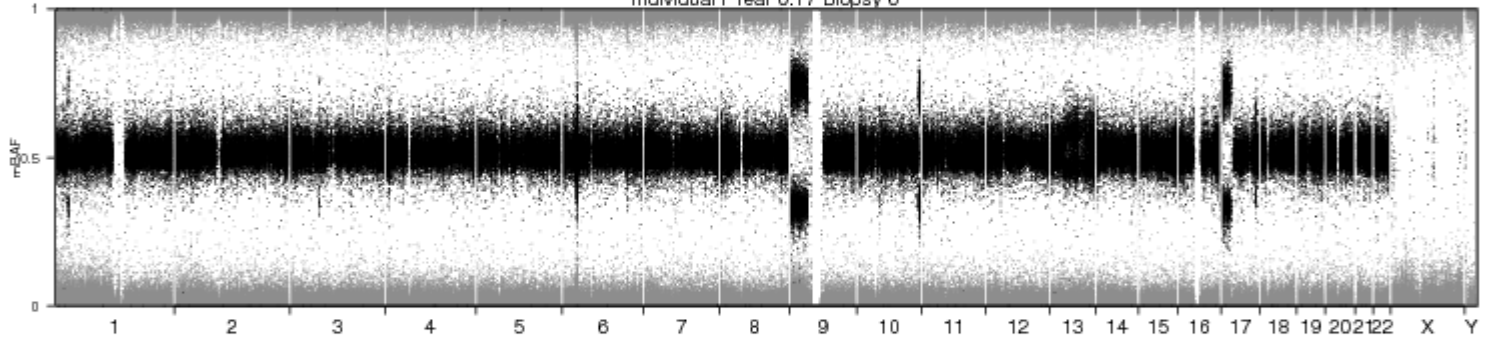

Individual f Year 0.17 Biopsy 6

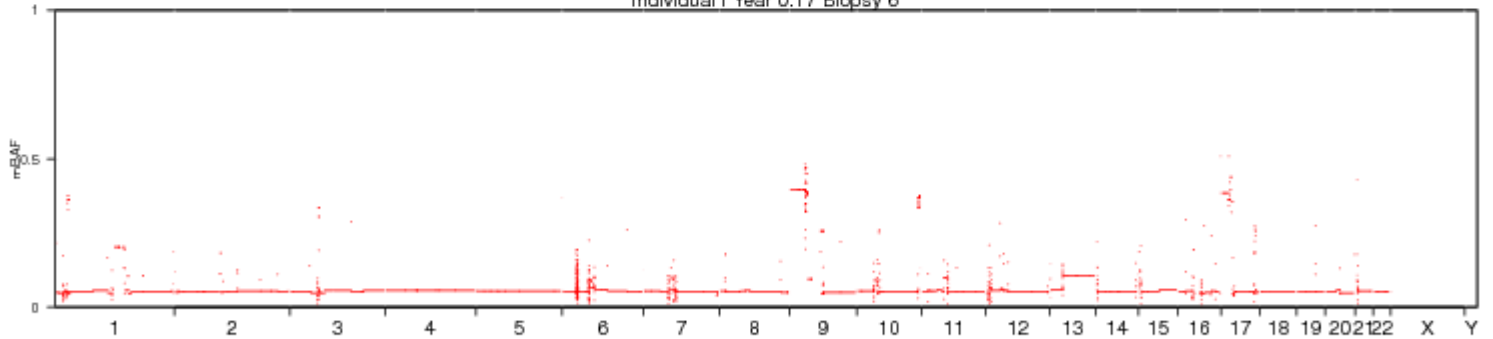

Individual f Year 0.17 Biopsy 6

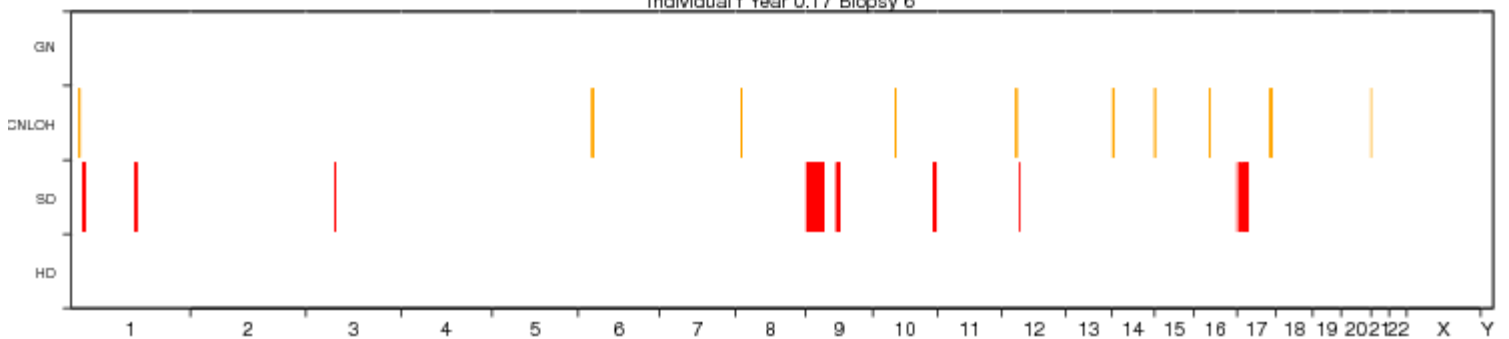

Individual f Year 1.11 Biopsy 7

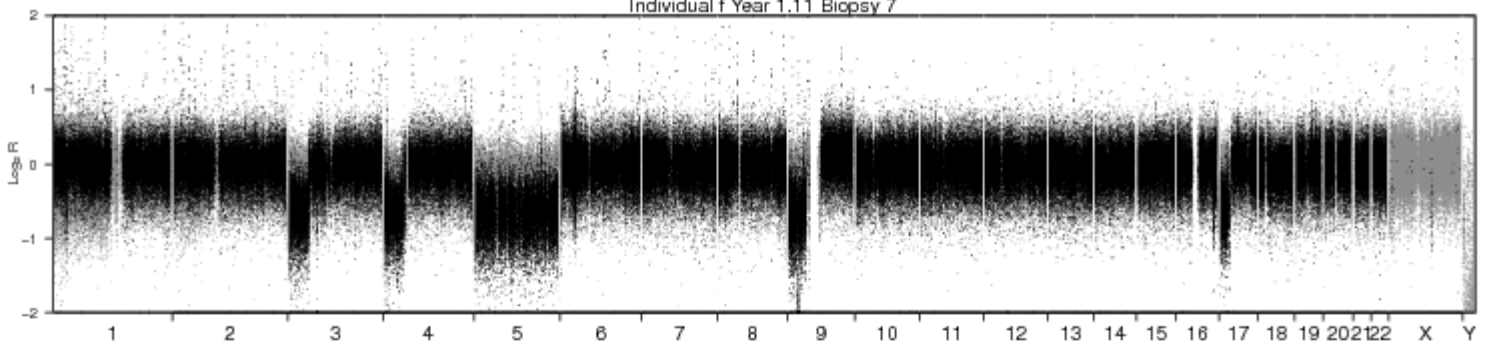

Individual f Year 1.11 Biopsy 7

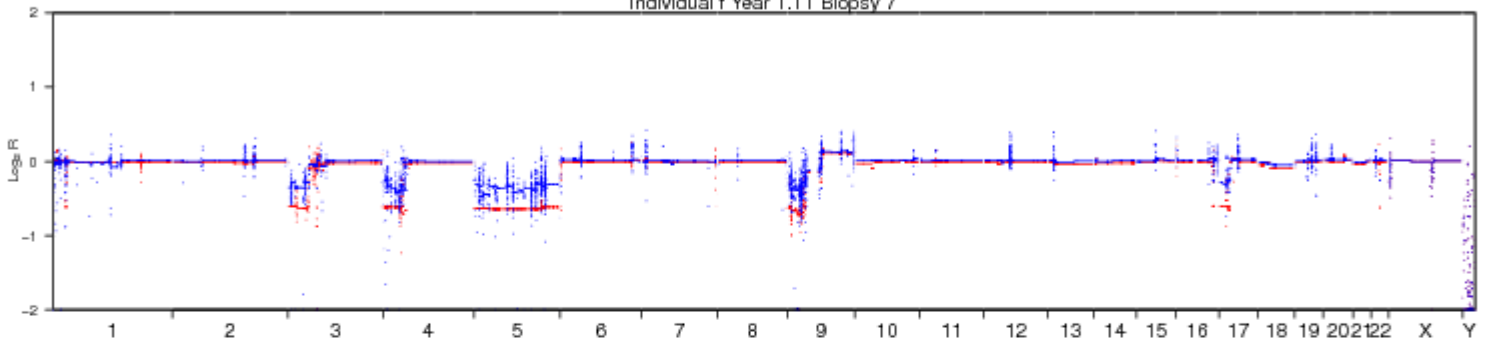

Individual f Year 1.11 Biopsy 7

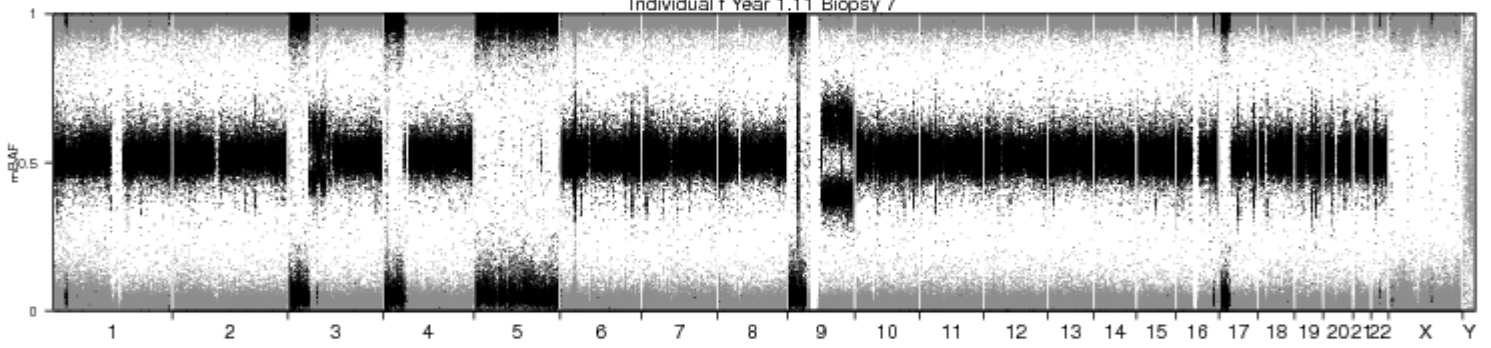

Individual f Year 1.11 Biopsy 7

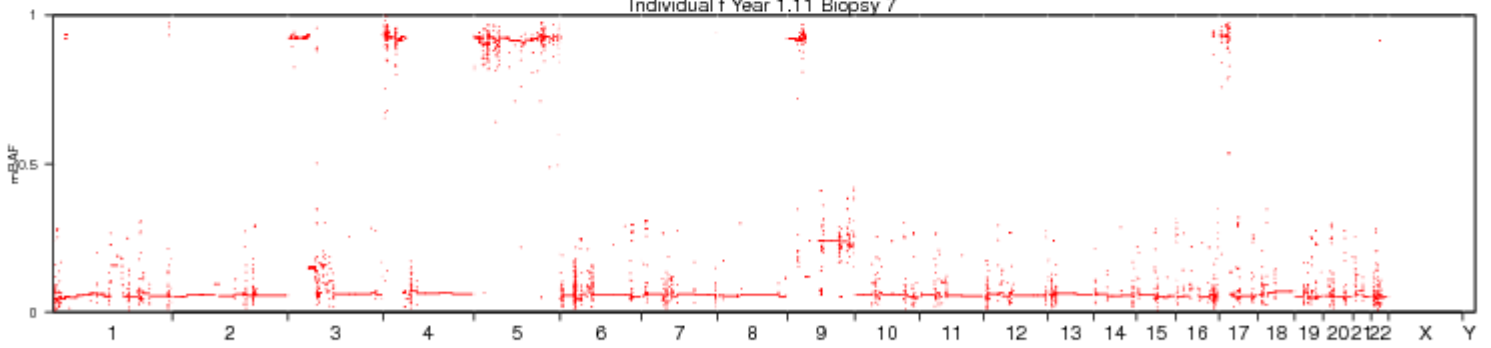

Individual f Year 1.11 Biopsy 7

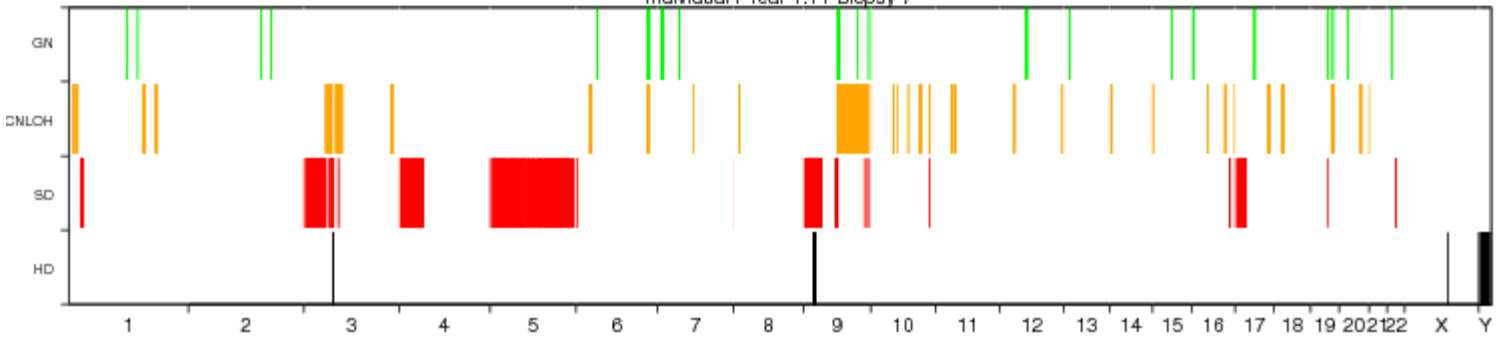



Individual f Year 1.11 Biopsy 8

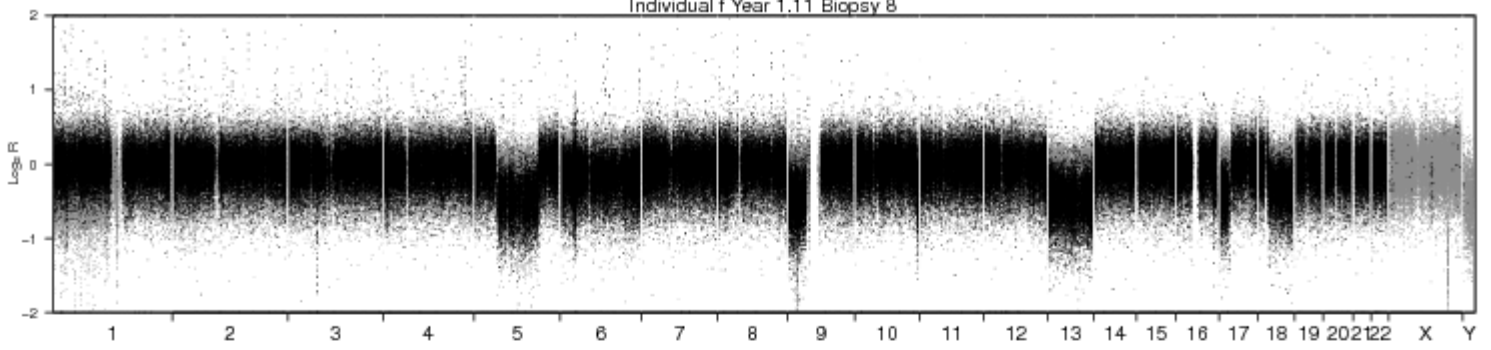

Individual f Year 1.11 Biopsy 8

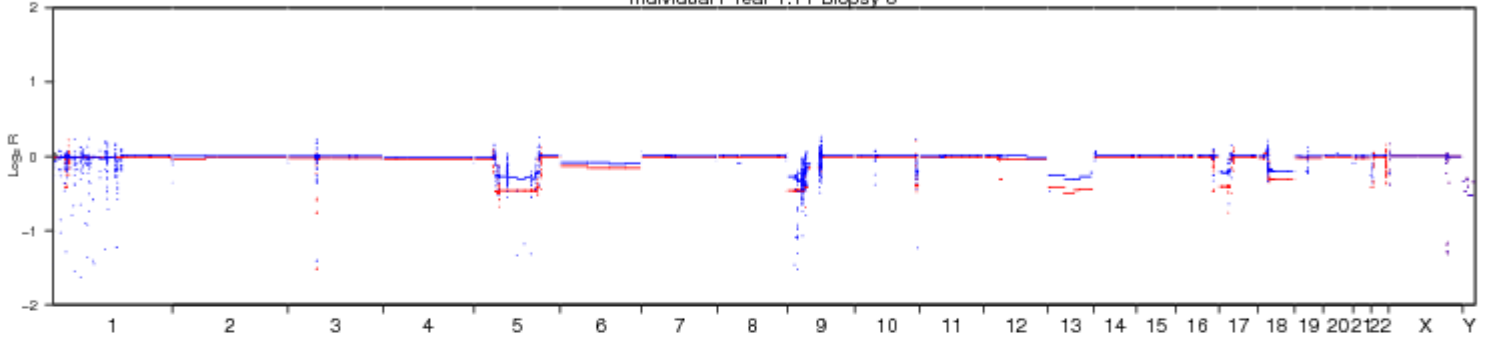

Individual f Year 1.11 Biopsy 8

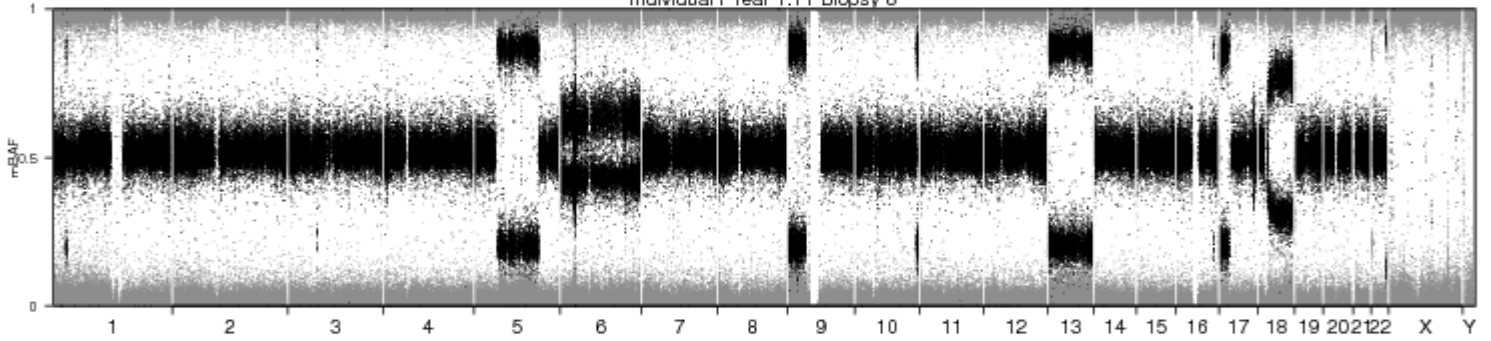

Individual f Year 1.11 Biopsy 8

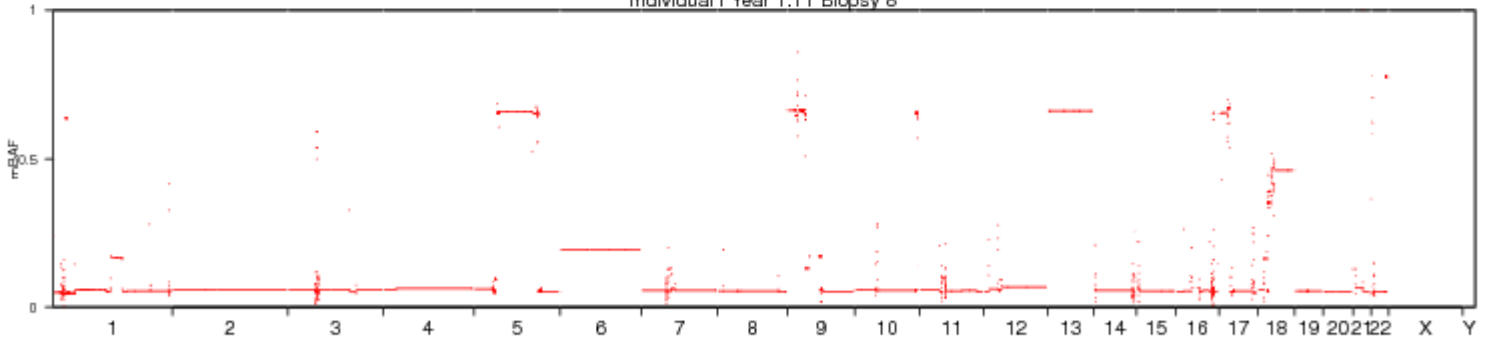

Individual f Year 1.11 Biopsy 8

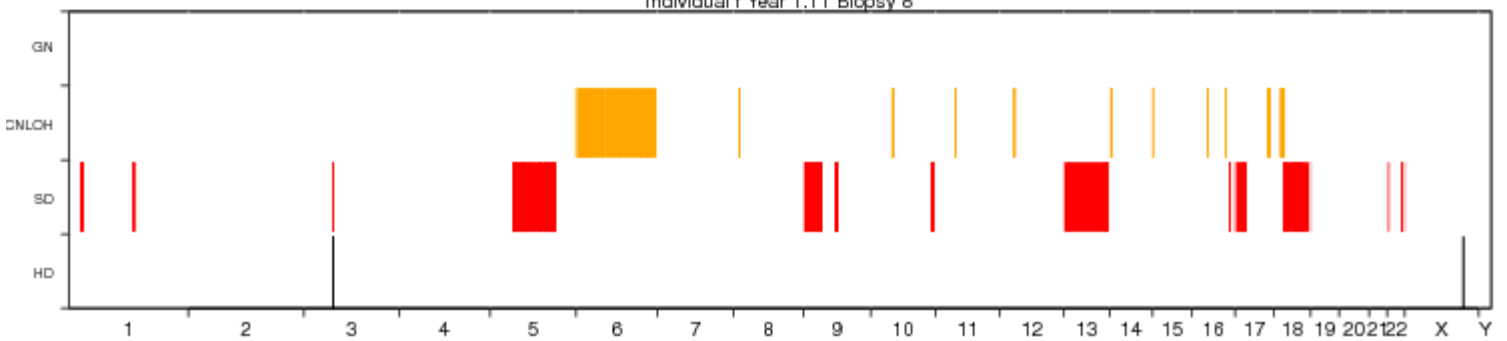

Individual f Year 1.67 Biopsy 9

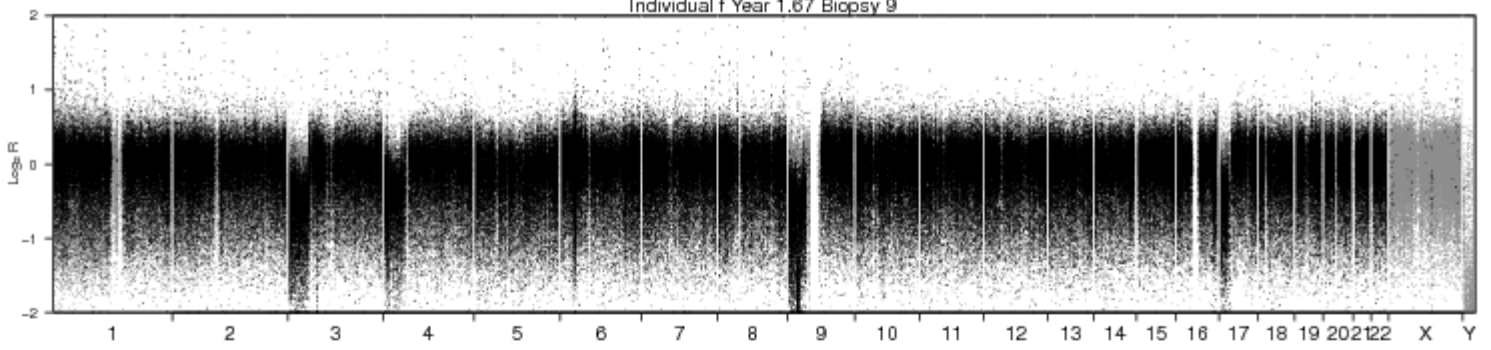

Individual f Year 1.67 Biopsy 9

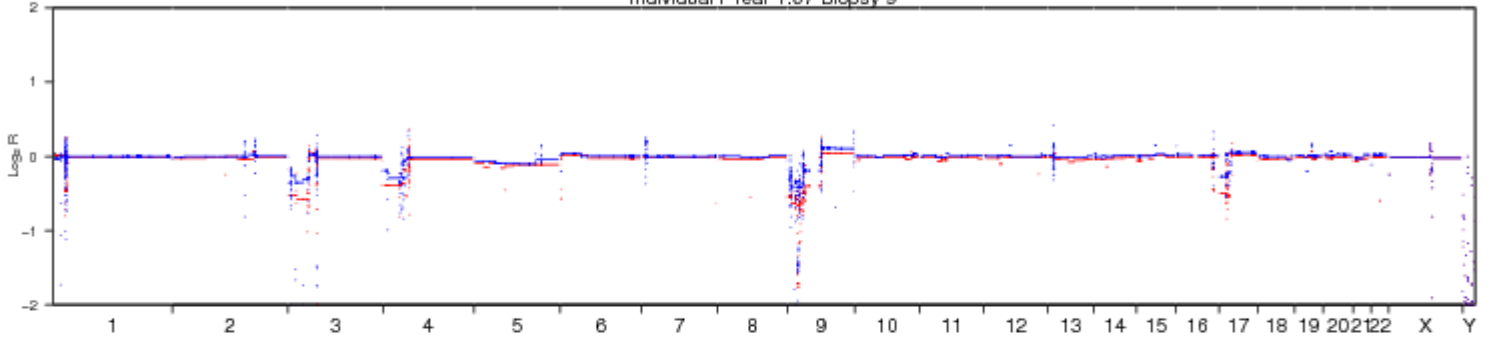

Individual f Year 1.67 Biopsy 9

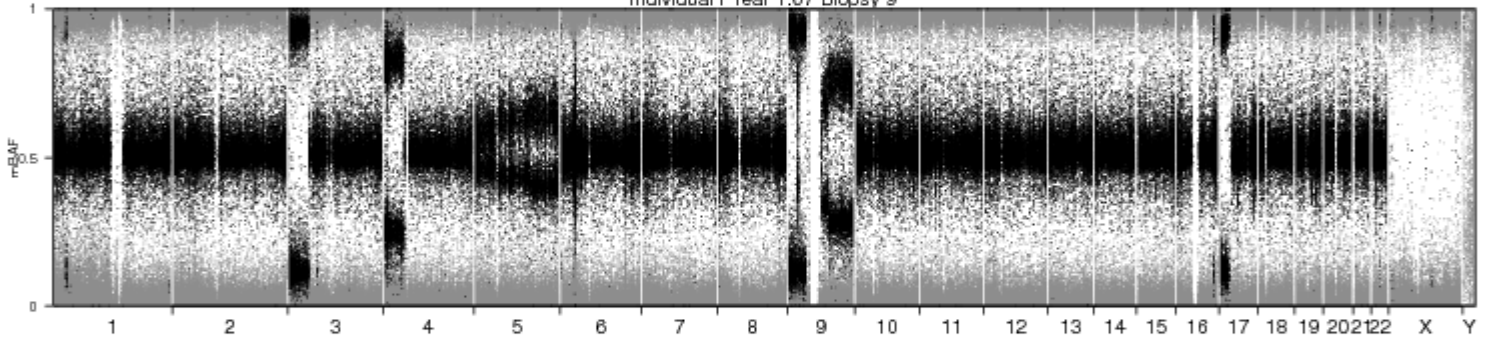

Individual f Year 1.67 Biopsy 9

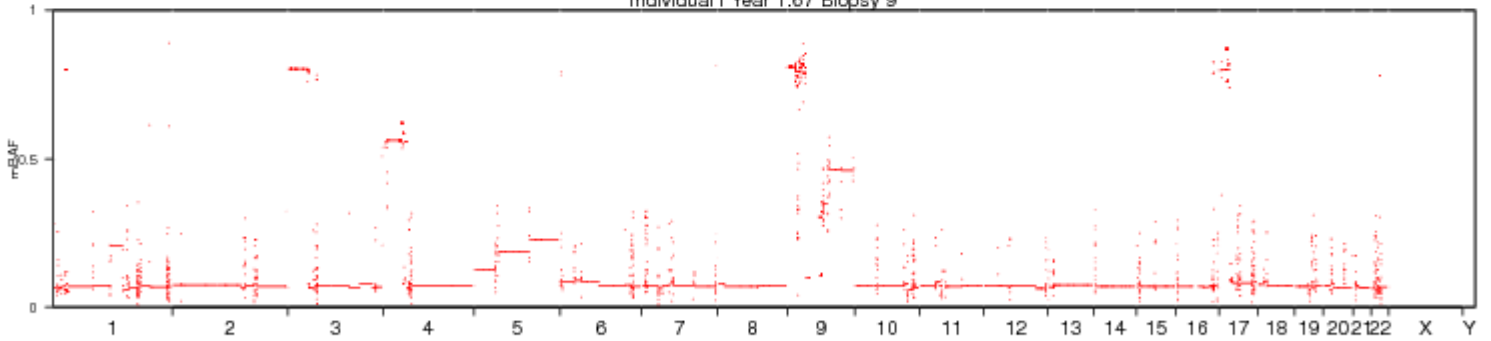

Individual f Year 1.67 Biopsy 9

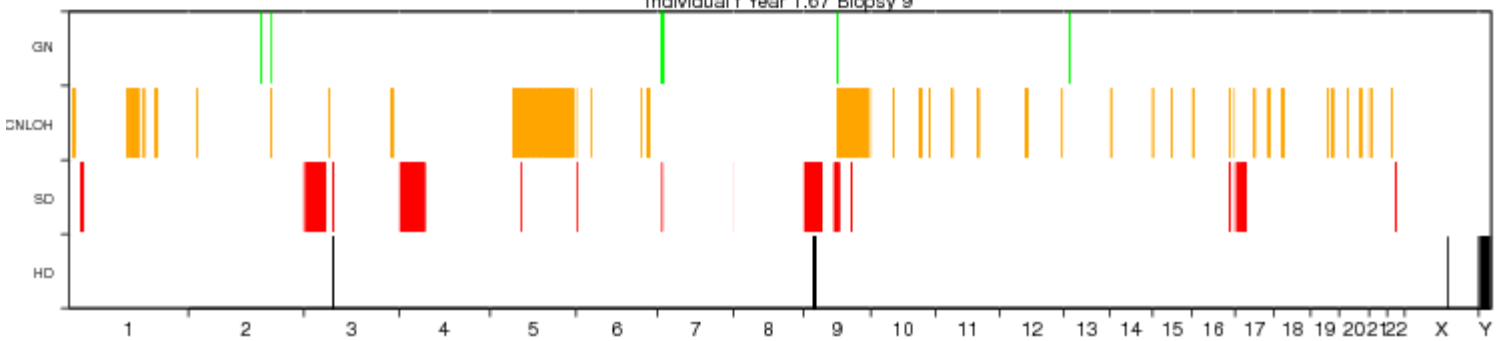

Individual f Year 1.67 Biopsy 10

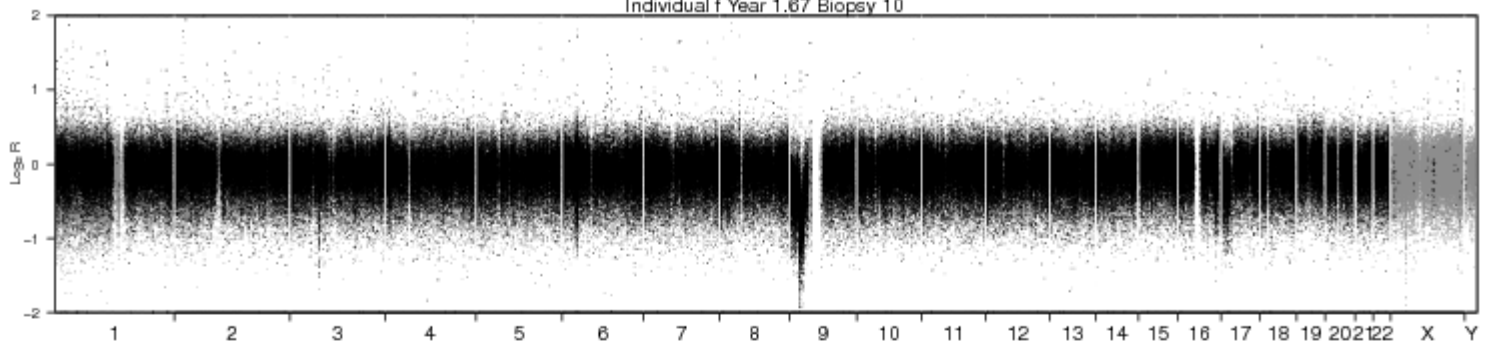

Individual f Year 1.67 Biopsy 10

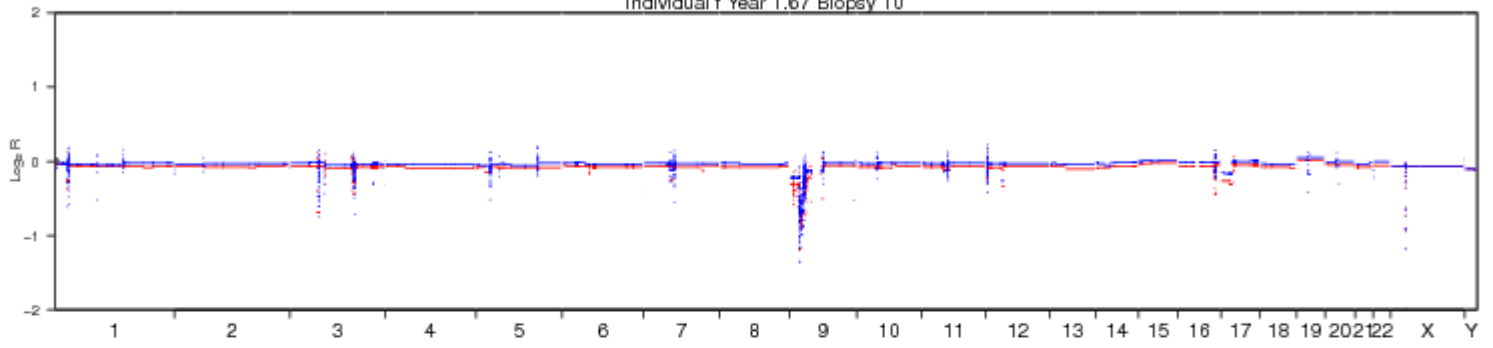

Individual f Year 1.67 Biopsy 10

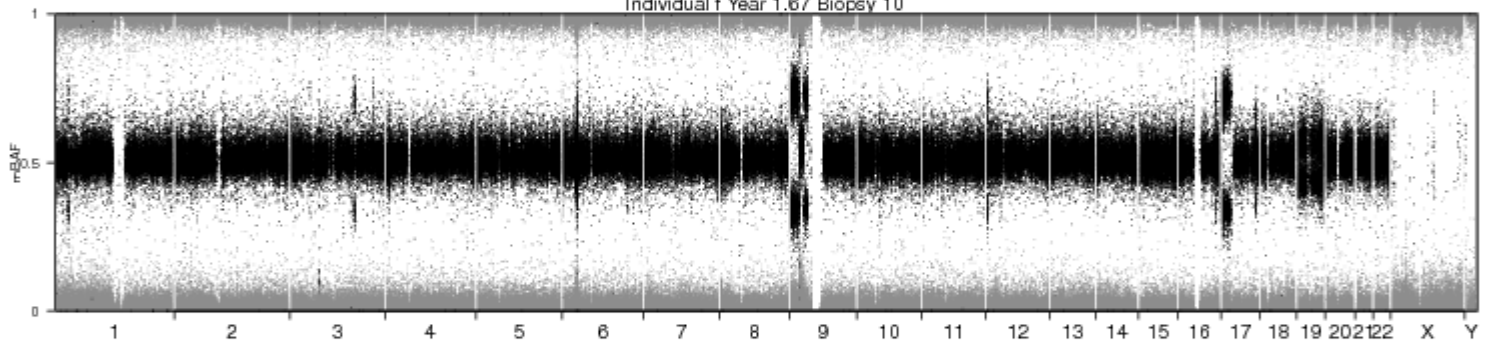

Individual f Year 1.67 Biopsy 10

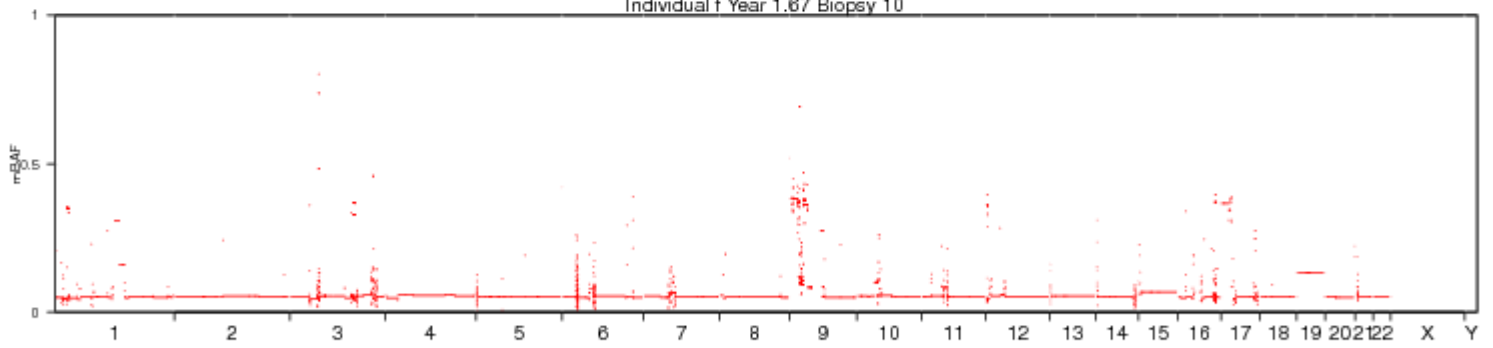

Individual f Year 1.67 Biopsy 10

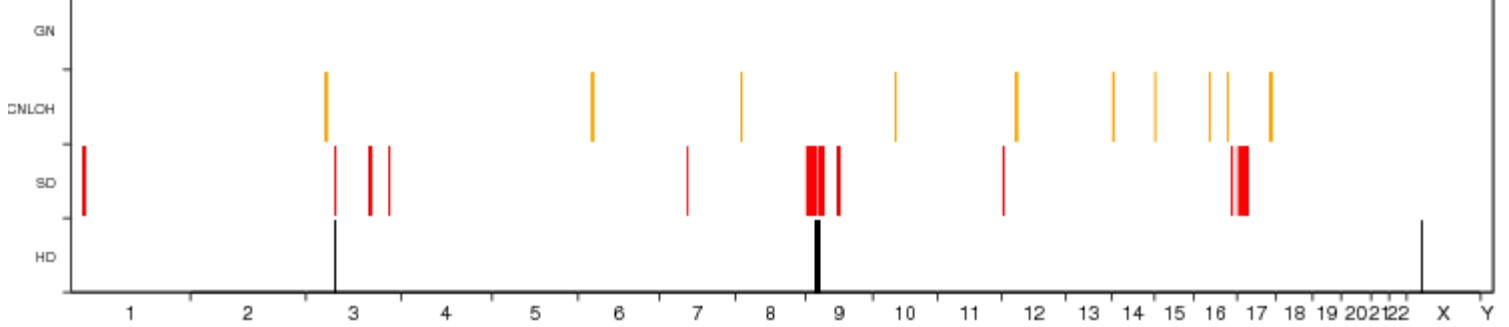

Individual f Year 2.22 Biopsy 11

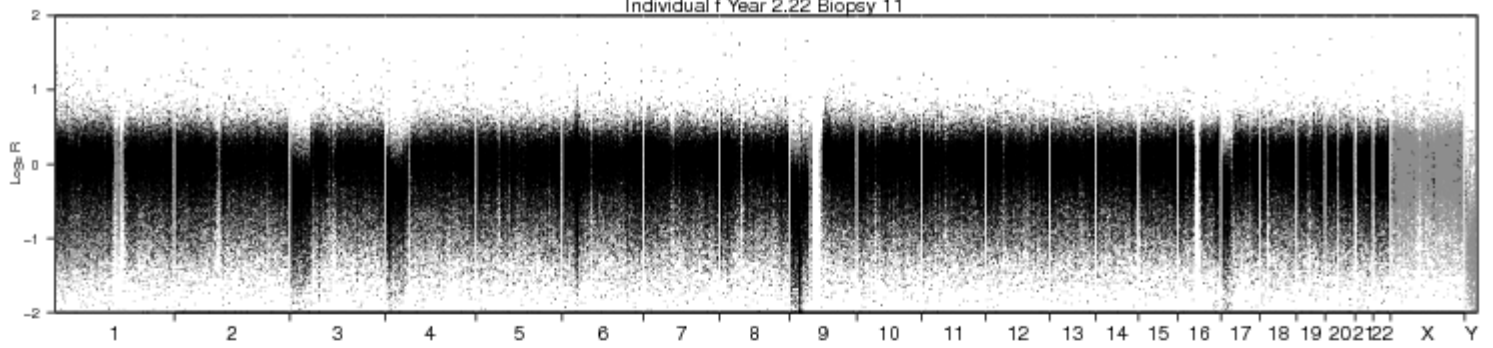

Individual f Year 2.22 Biopsy 11

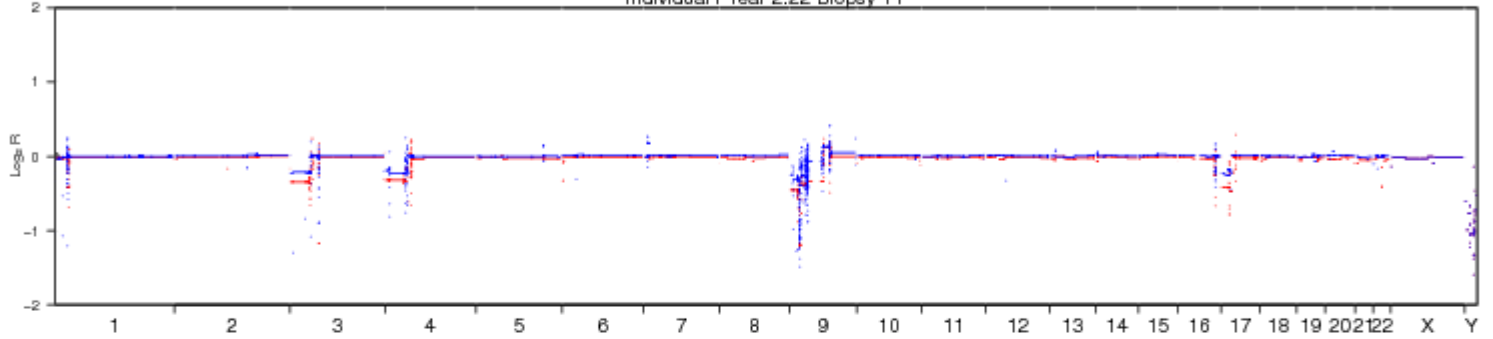

Individual f Year 2.22 Biopsy 11

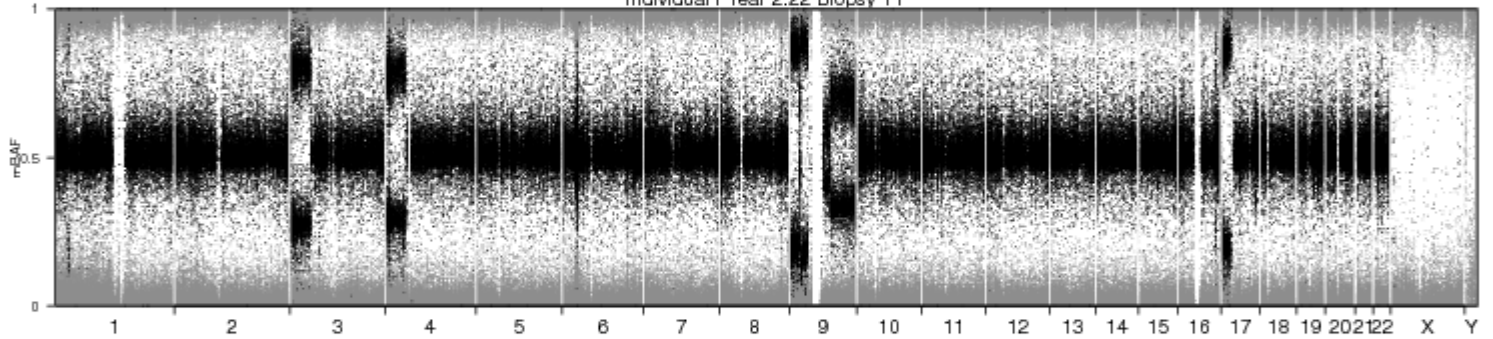

Individual f Year 2.22 Biopsy 11

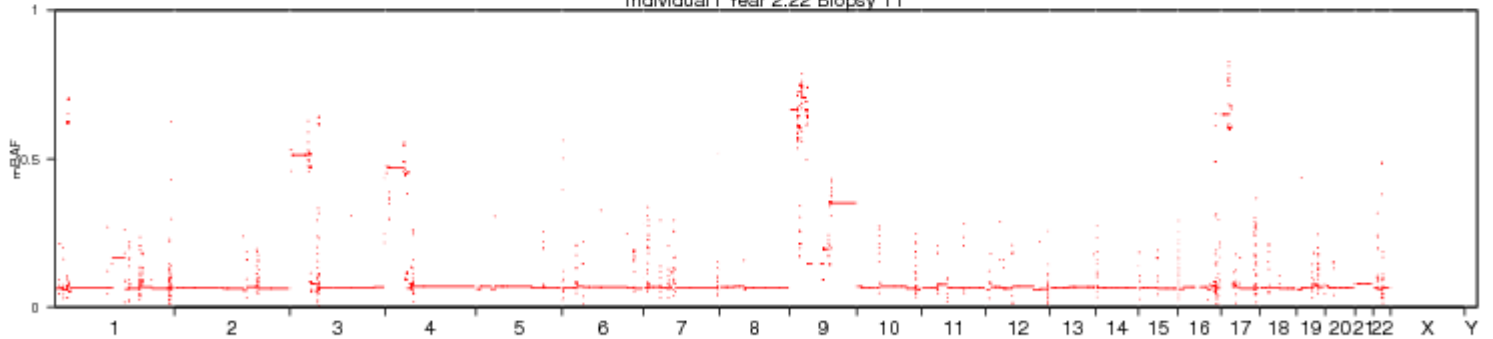

Individual f Year 2.22 Biopsy 11

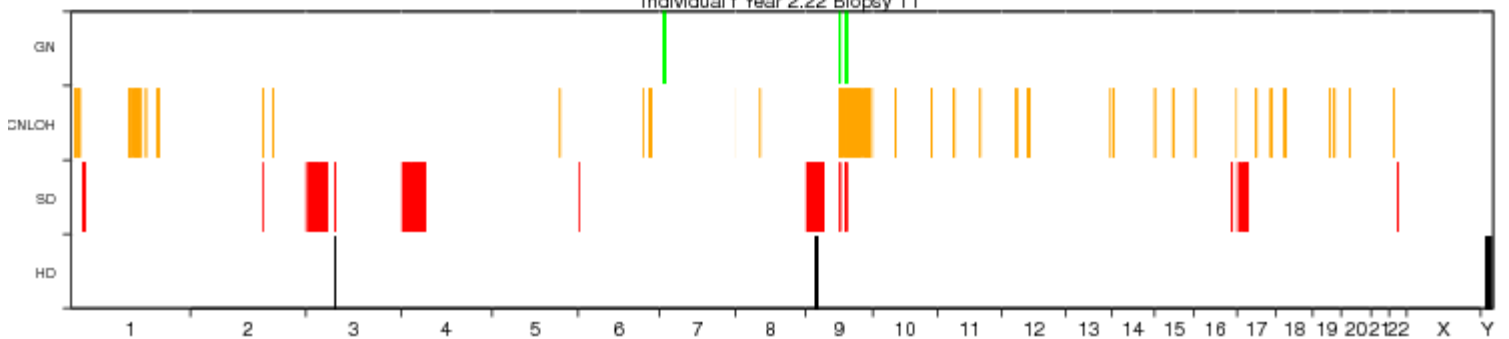



Individual f Year 2.22 Biopsy 12

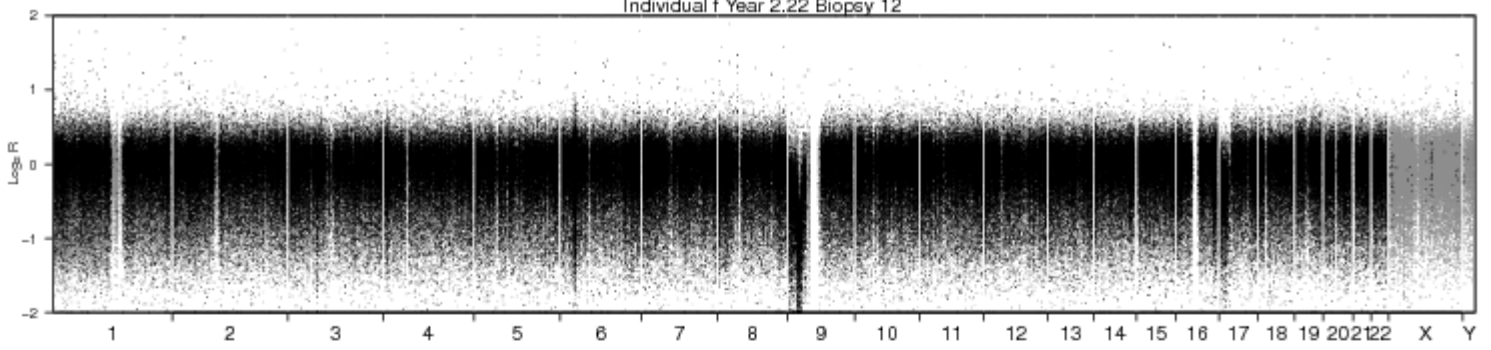

Individual f Year 2.22 Biopsy 12

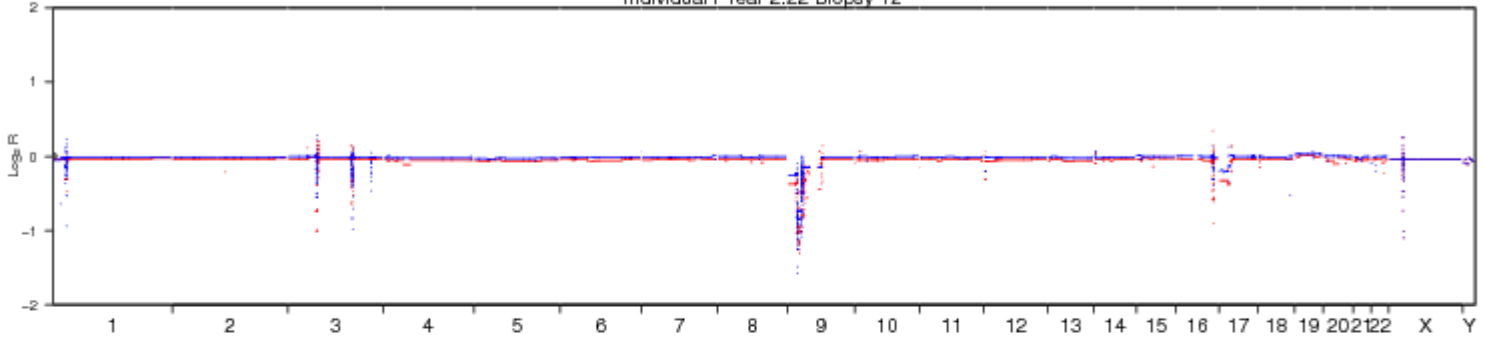

Individual f Year 2.22 Biopsy 12

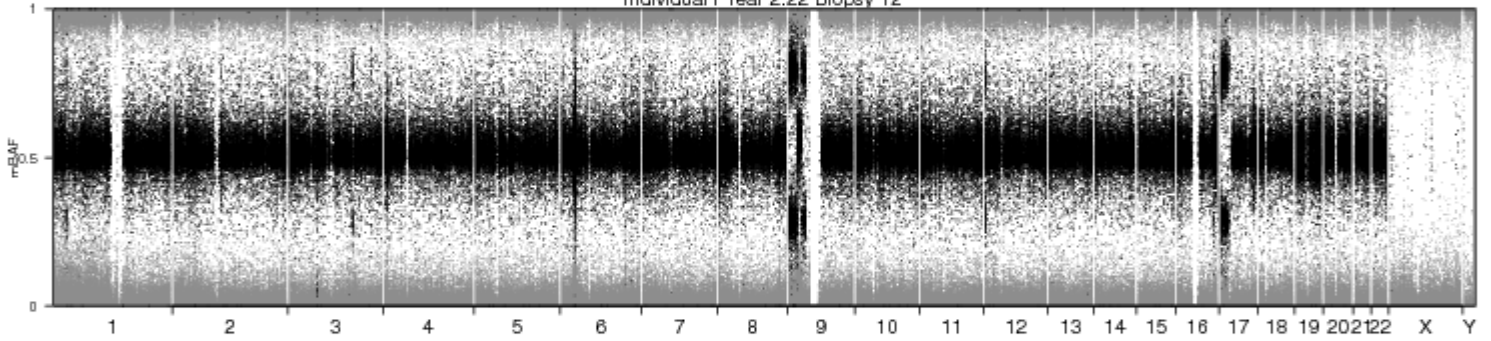

Individual f Year 2.22 Biopsy 12

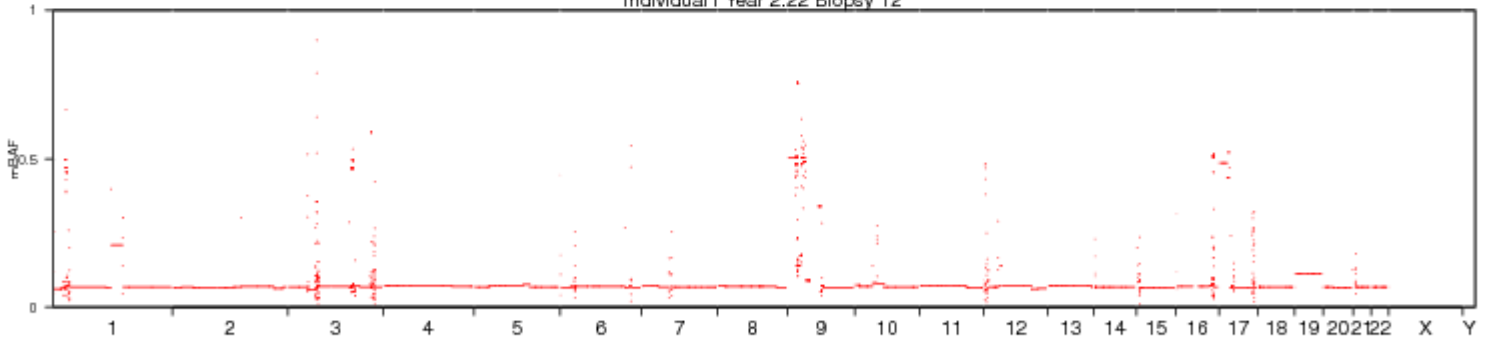

Individual f Year 2.22 Biopsy 12

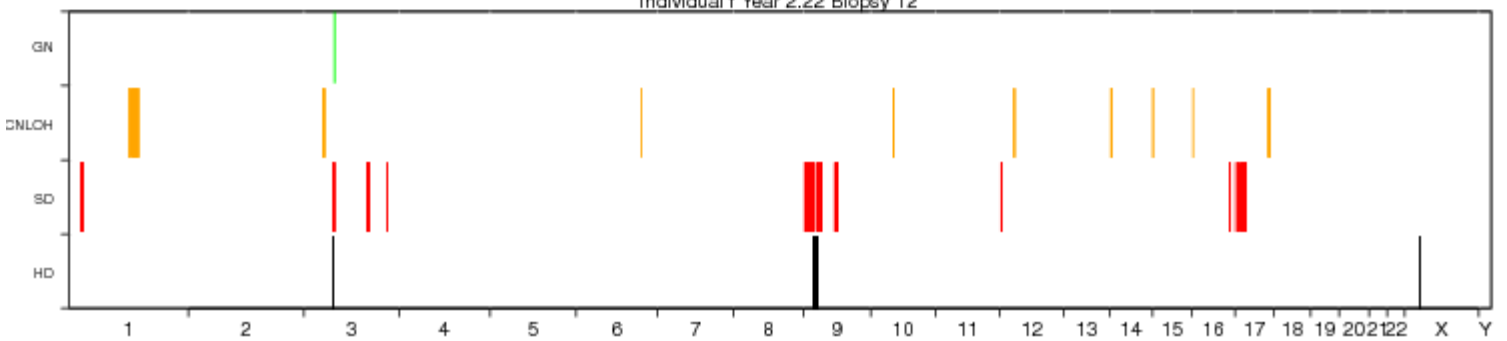

Individual f Year 4.35 Biopsy 13

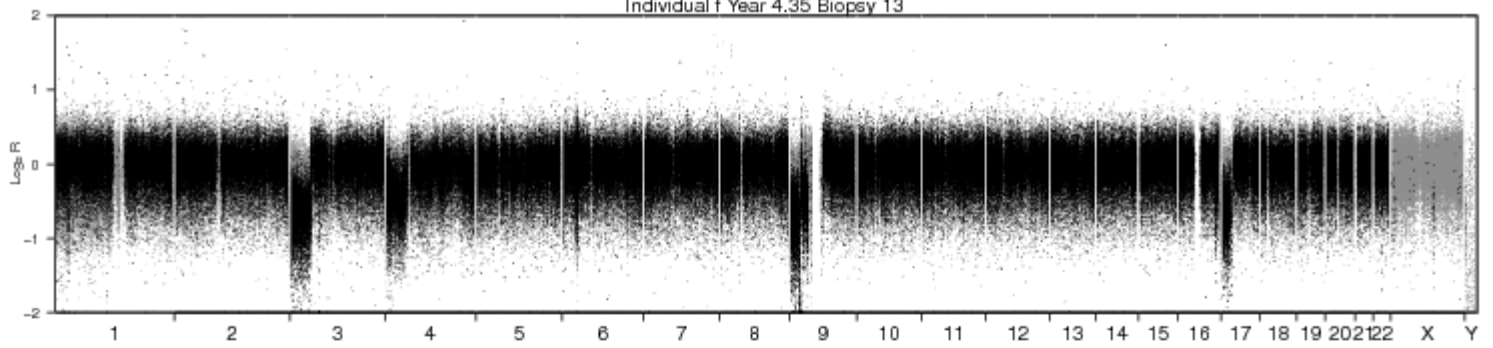

Individual f Year 4.35 Biopsy 13

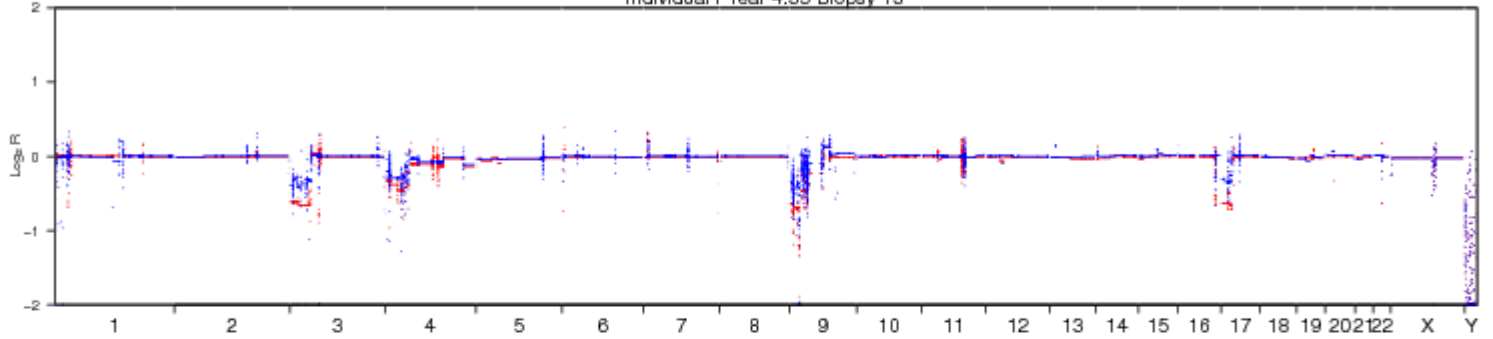

Individual f Year 4.35 Biopsy 13

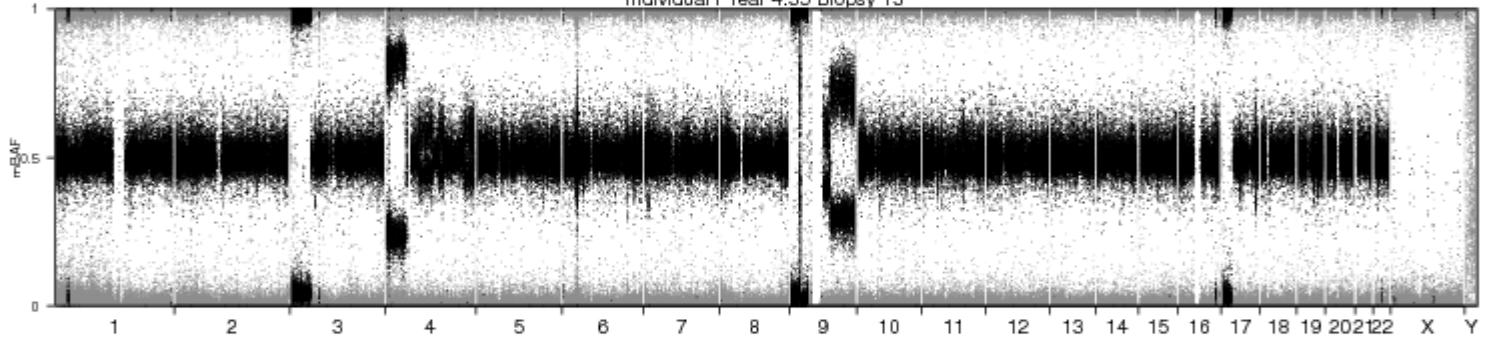

Individual f Year 4.35 Biopsy 13

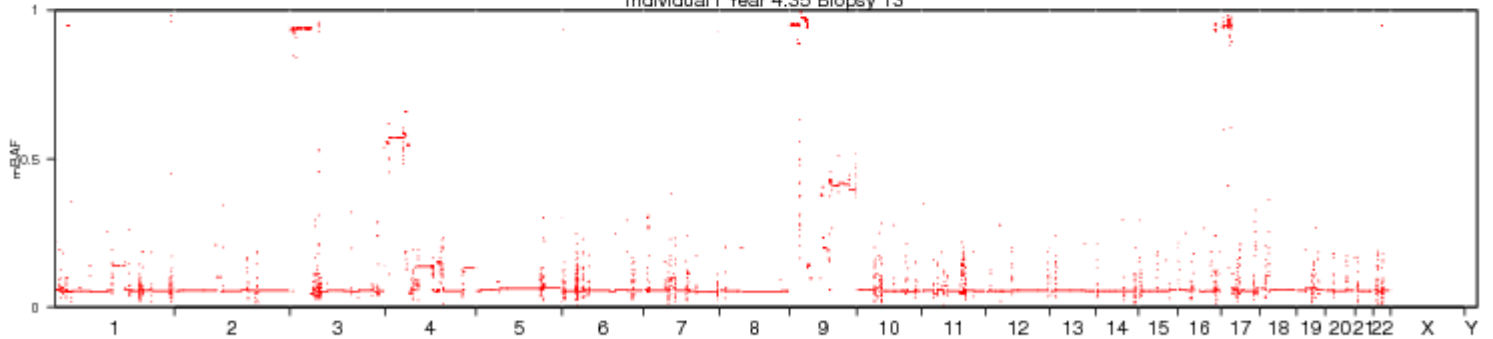

Individual f Year 4.35 Biopsy 13

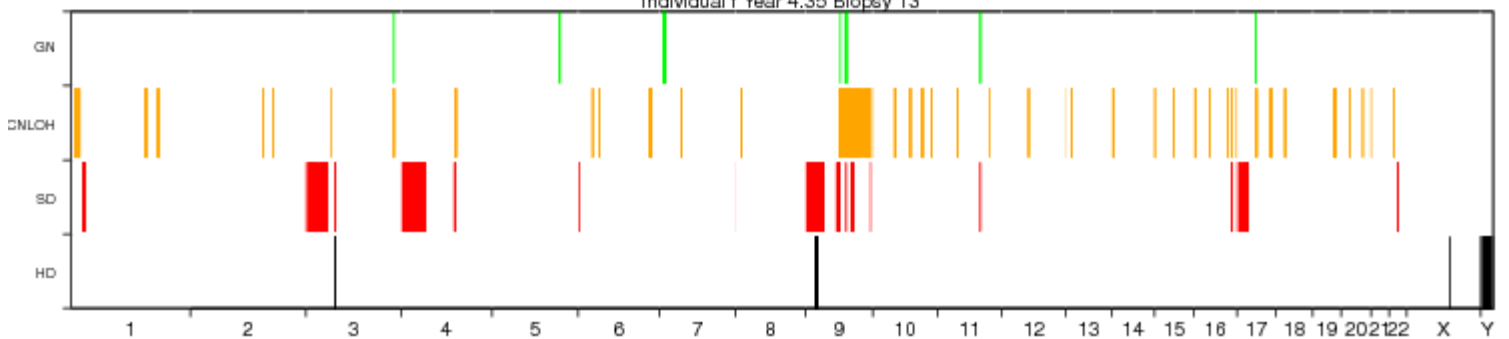

Individual f Year 4.35 Biopsy 14

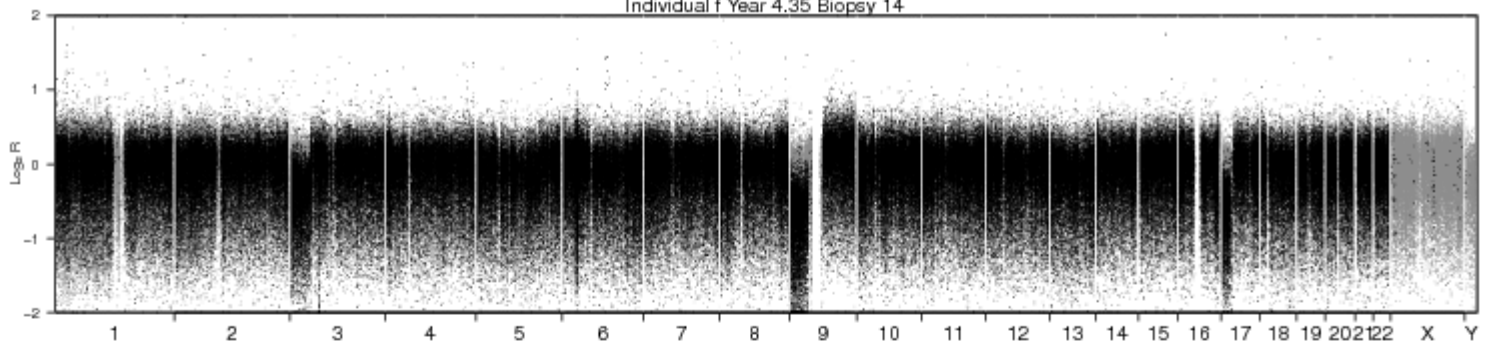

Individual f Year 4.35 Biopsy 14

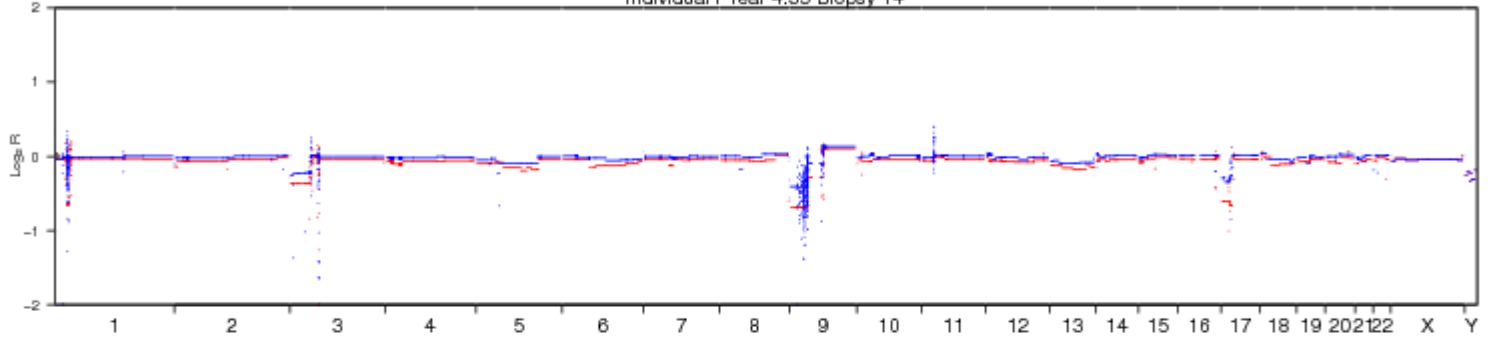

Individual f Year 4.35 Biopsy 14

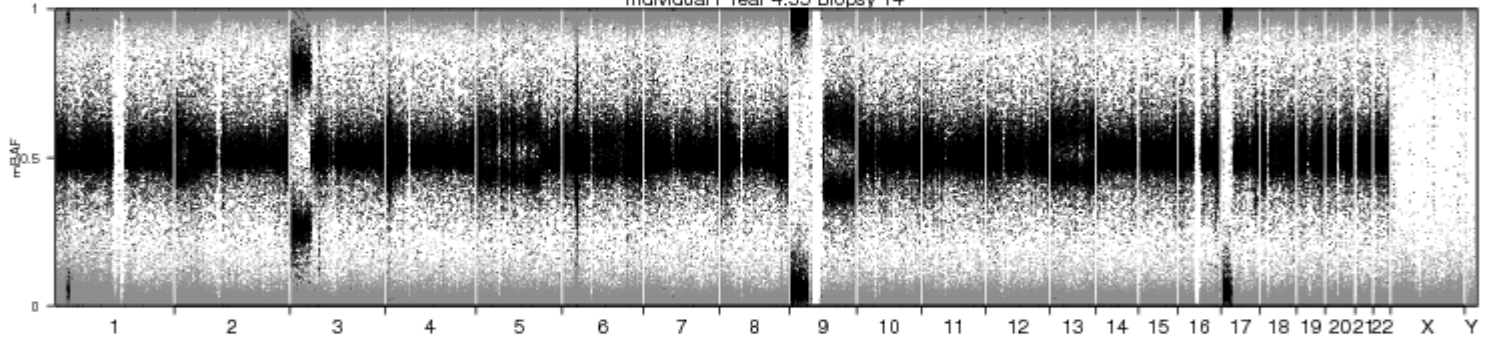

Individual f Year 4.35 Biopsy 14

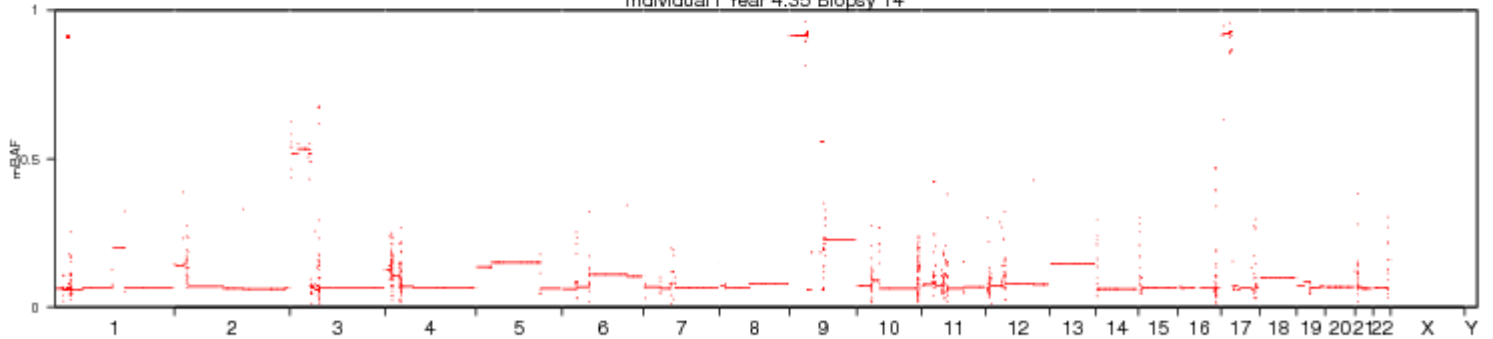

Individual f Year 4.35 Biopsy 14

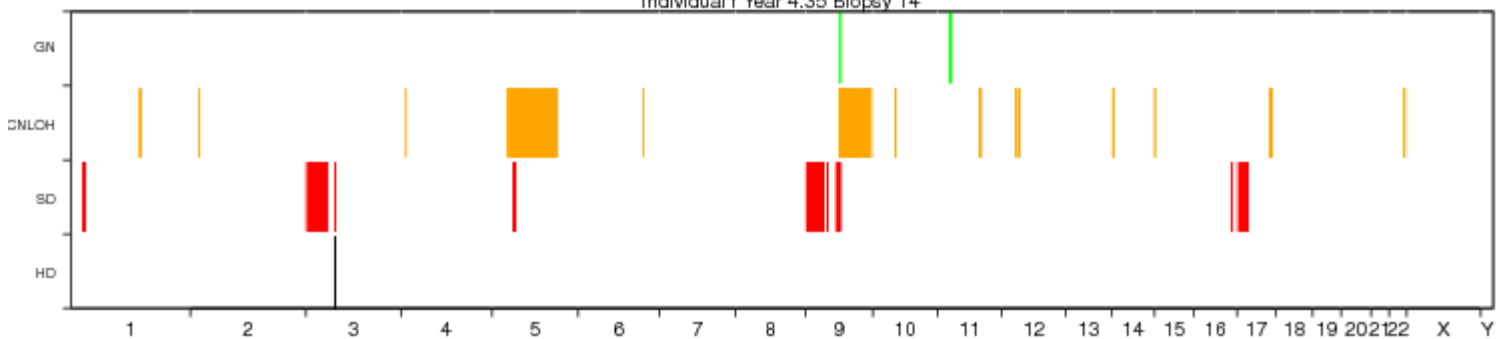



Individual f Year 5.75 Biopsy 15

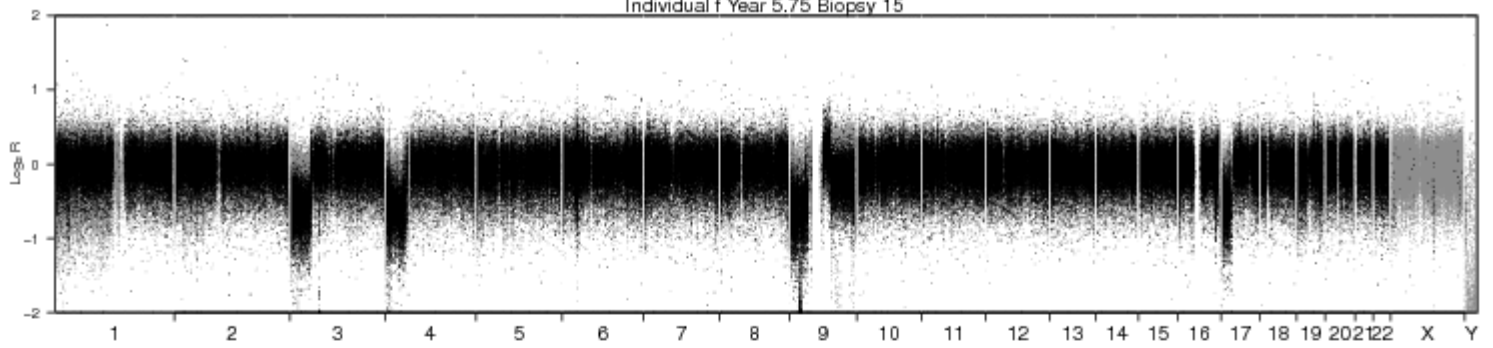

Individual f Year 5.75 Biopsy 15

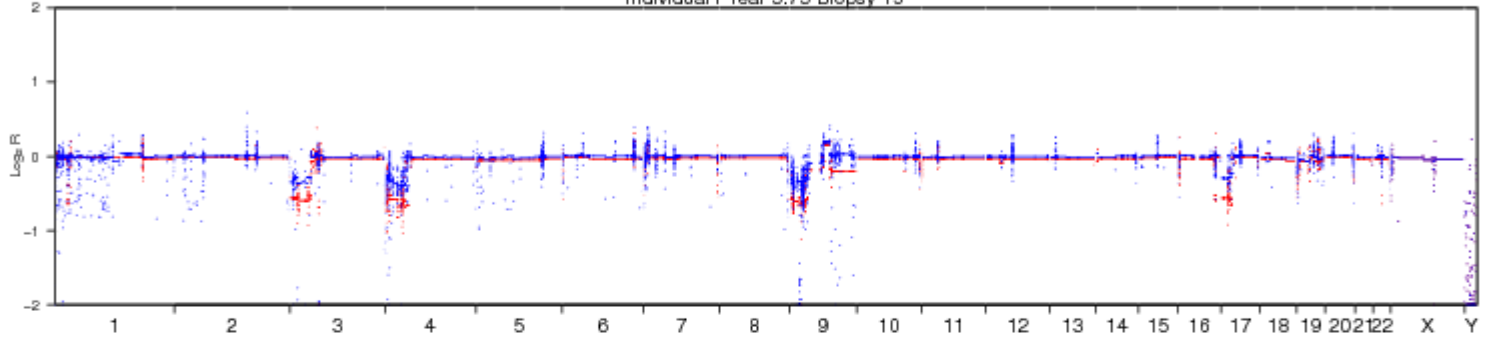

Individual f Year 5.75 Biopsy 15

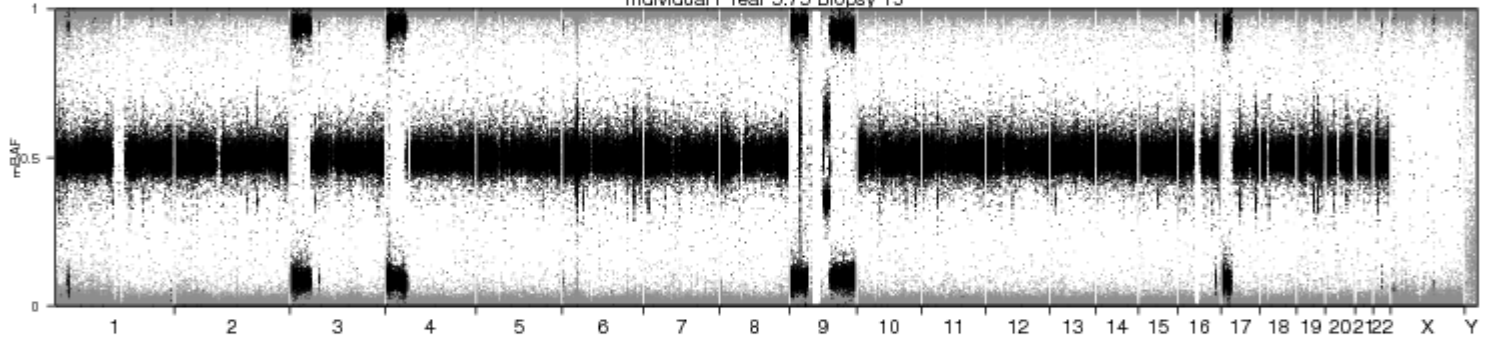

Individual f Year 5.75 Biopsy 15

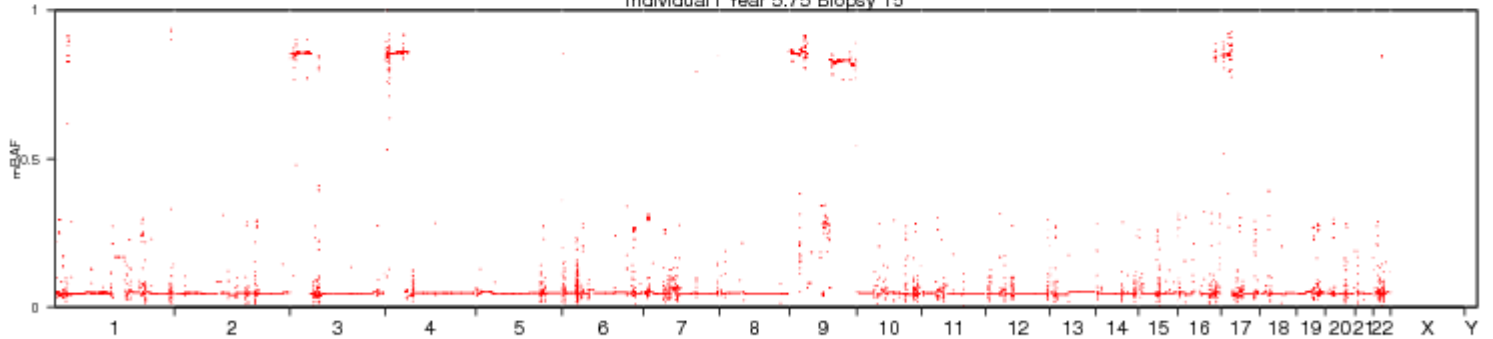

Individual f Year 5.75 Biopsy 15

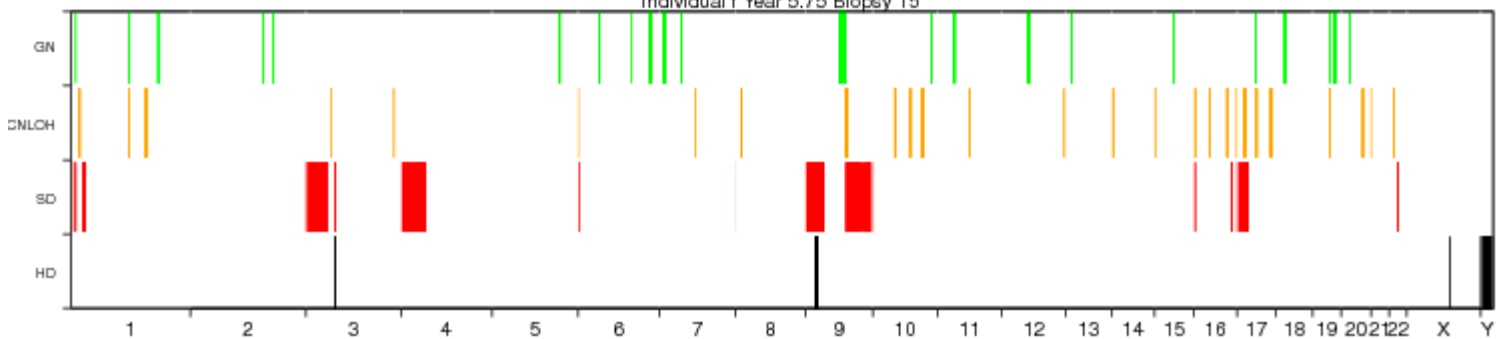



Individual f Year 5.75 Biopsy 16

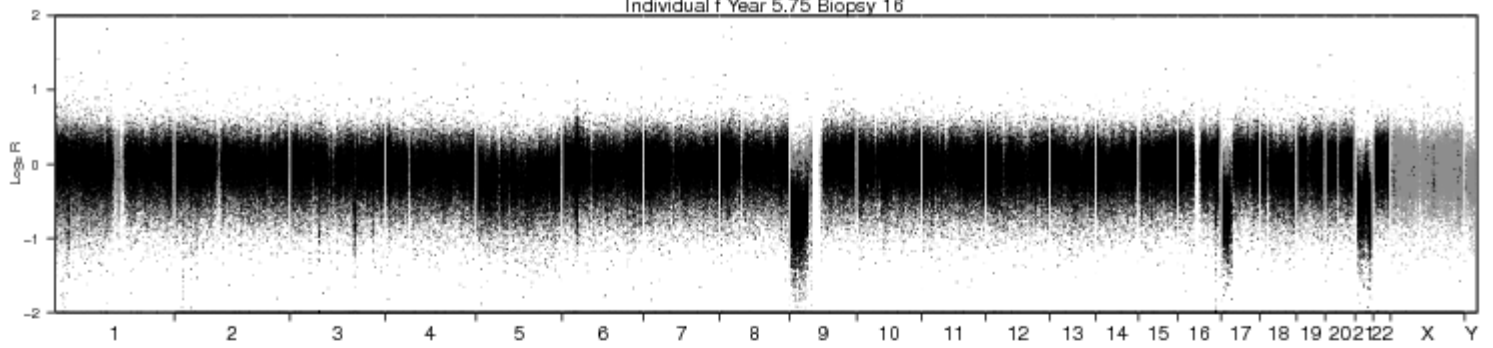

Individual f Year 5.75 Biopsy 16

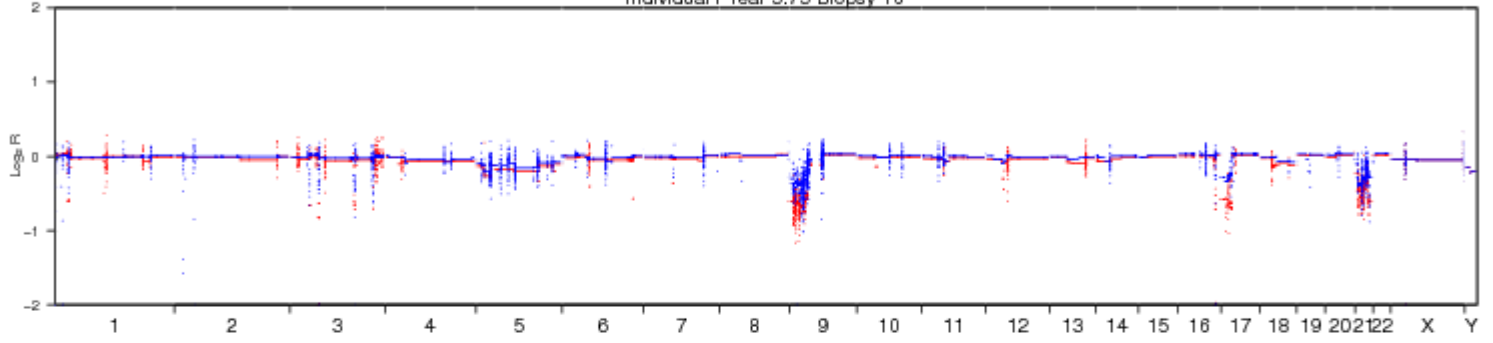

Individual f Year 5.75 Biopsy 16

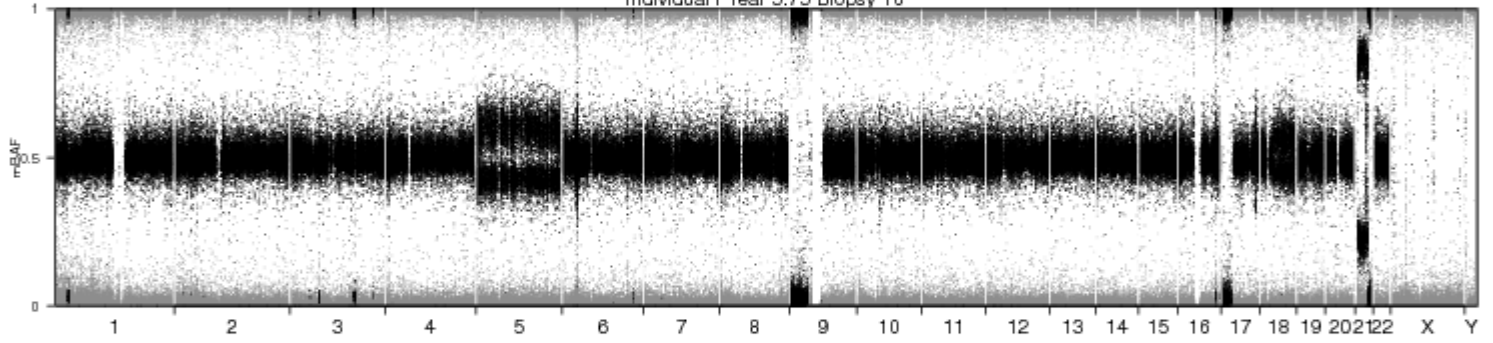

Individual f Year 5.75 Biopsy 16

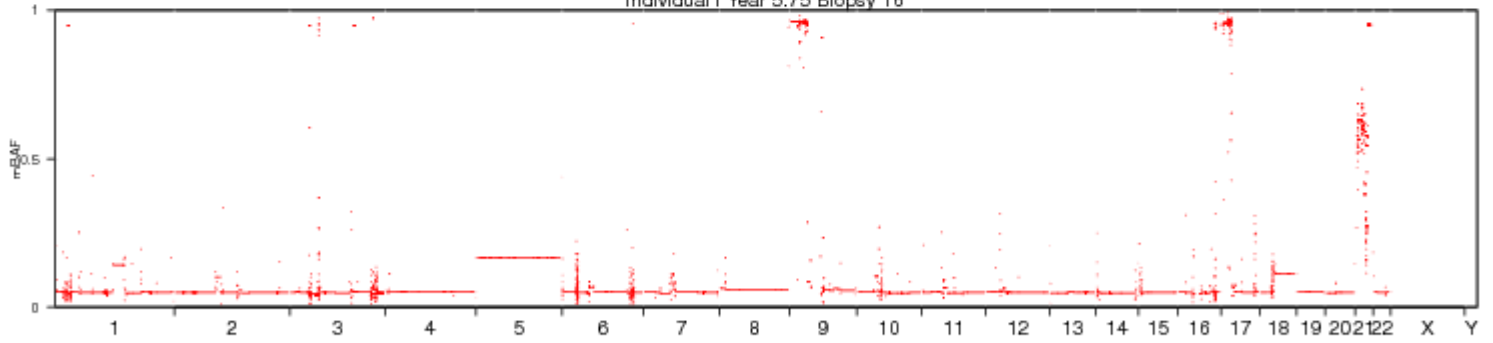

Individual f Year 5.75 Biopsy 16

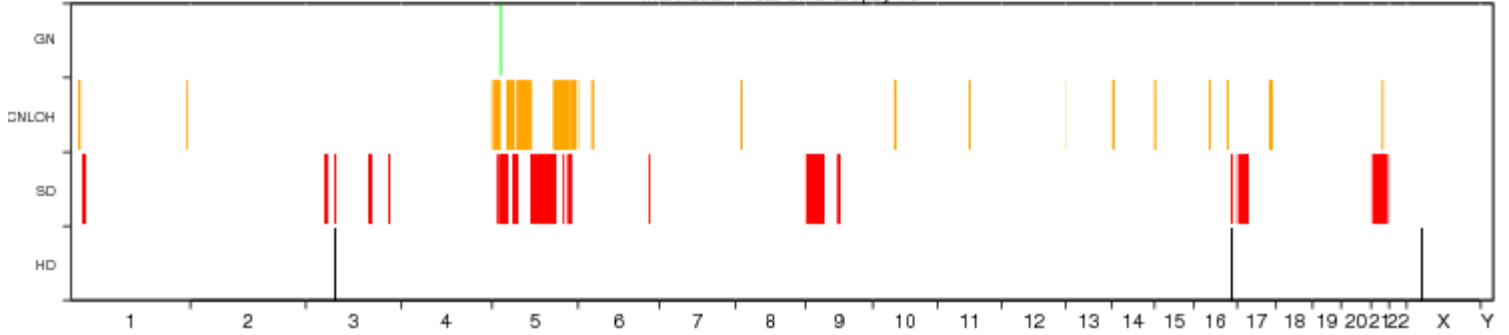

Individual f Year 5.75 Biopsy 17

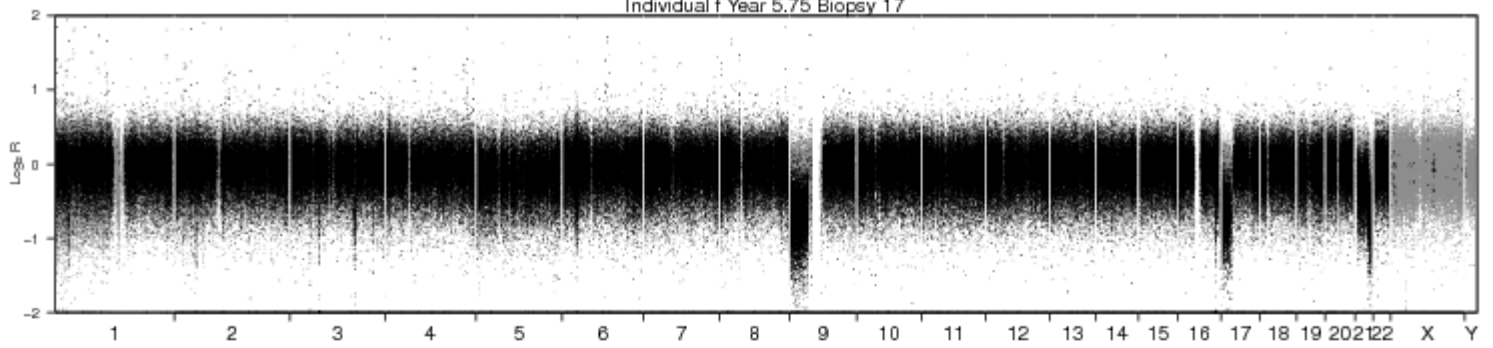

Individual f Year 5.75 Biopsy 17

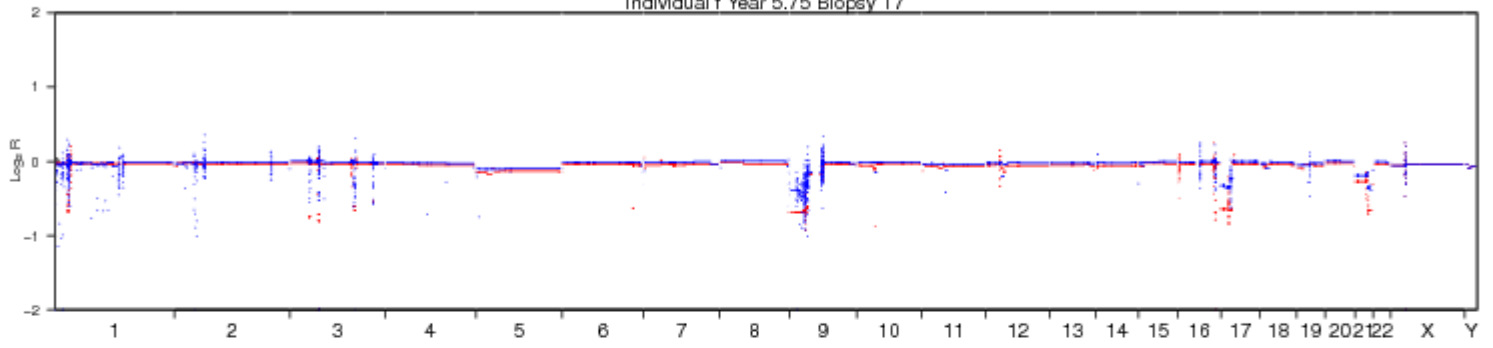

Individual f Year 5.75 Biopsy 17

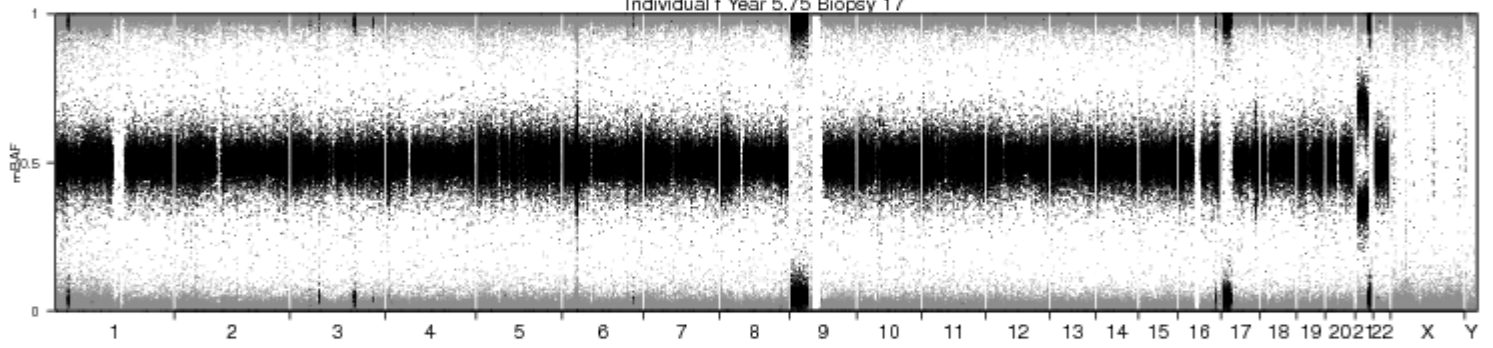

Individual f Year 5.75 Biopsy 17

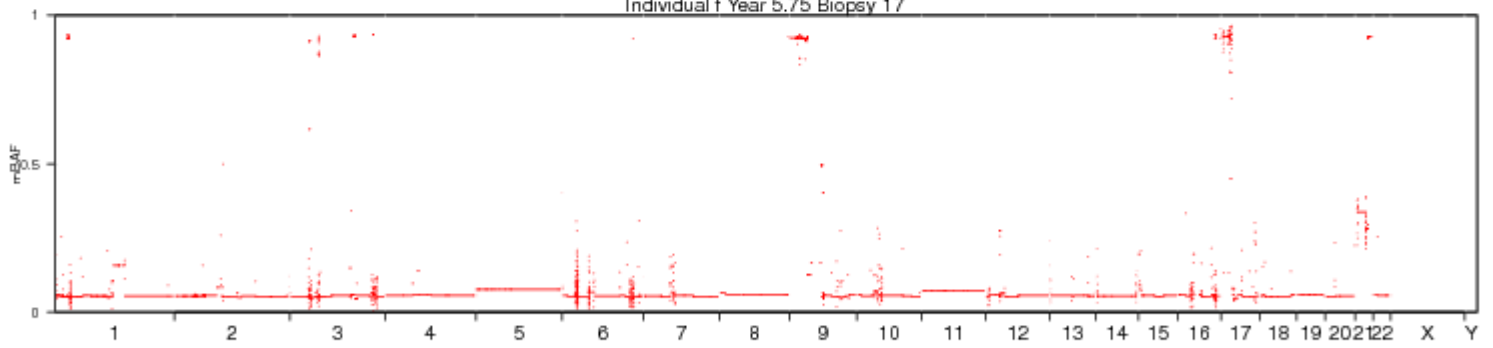

Individual f Year 5.75 Biopsy 17

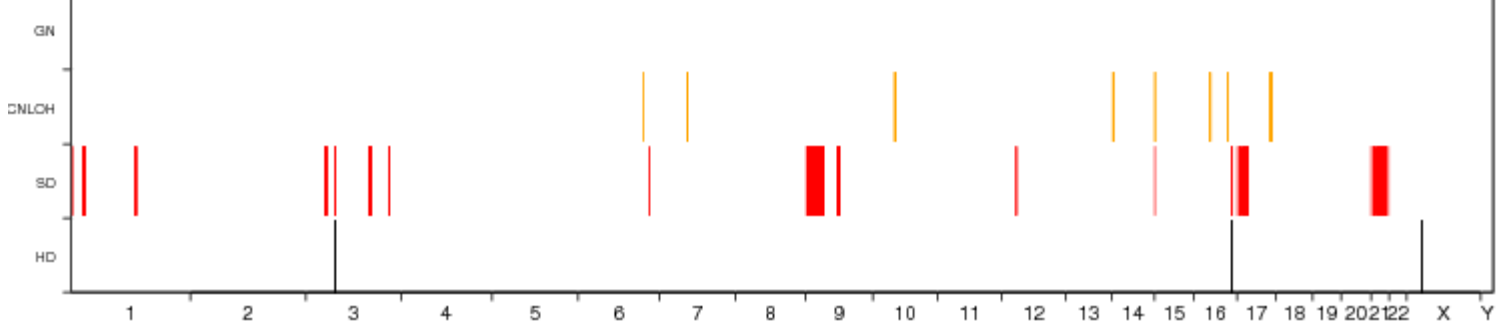

Individual f Year 5.75 Biopsy 18

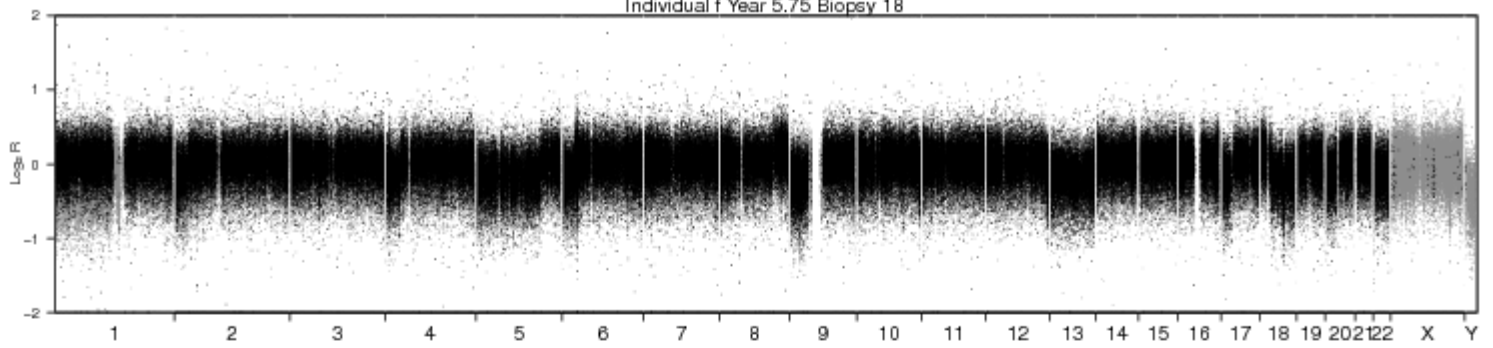

Individual f Year 5.75 Biopsy 18

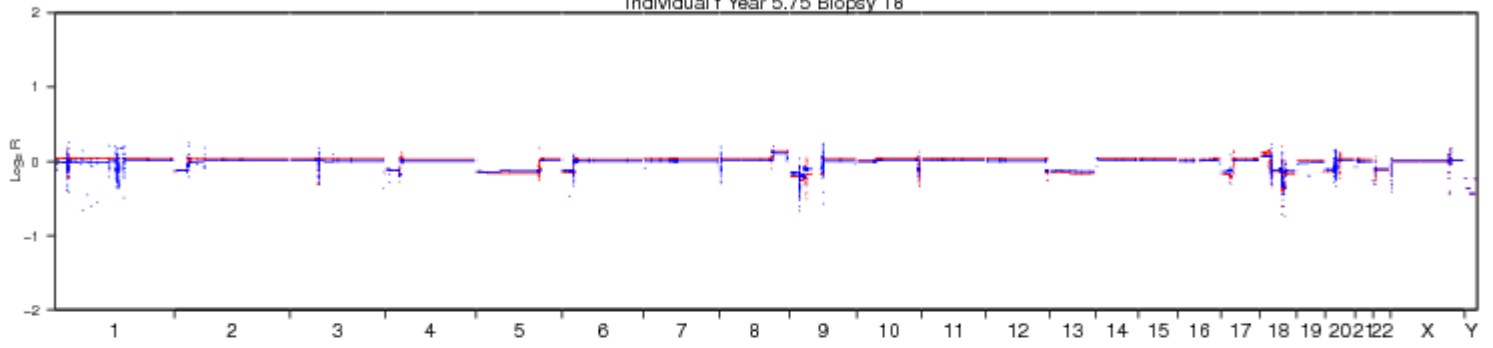

Individual f Year 5.75 Biopsy 18

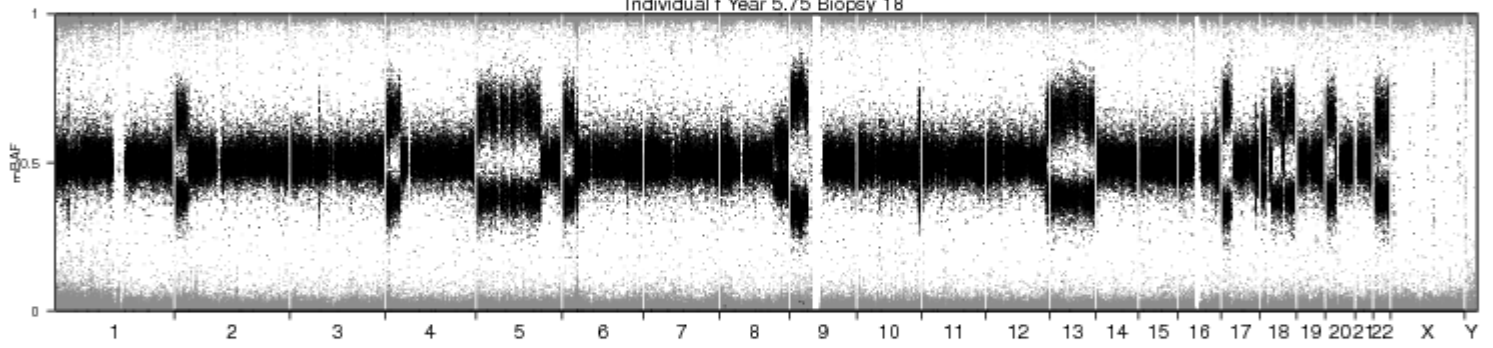

Individual f Year 5.75 Biopsy 18

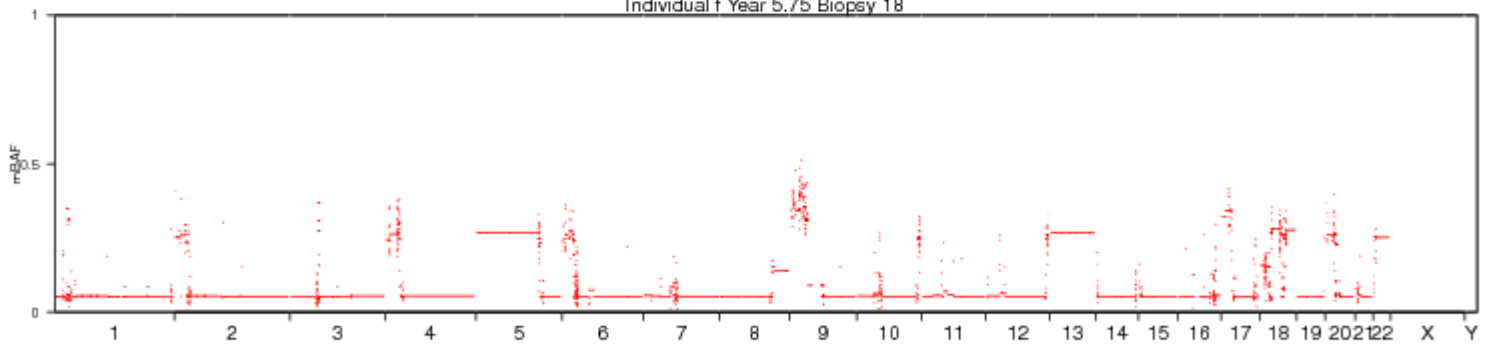

Individual f Year 5.75 Biopsy 18

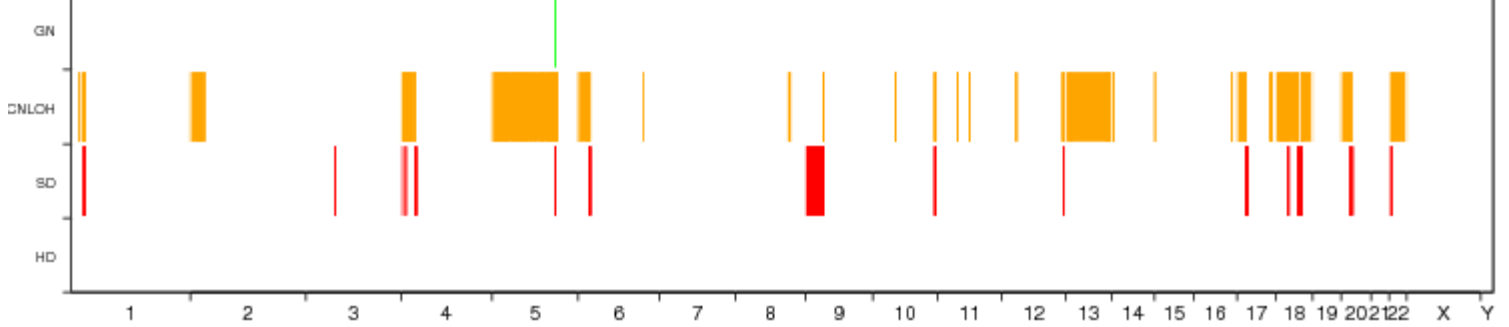

Individual f Year 6.36 Biopsy 19

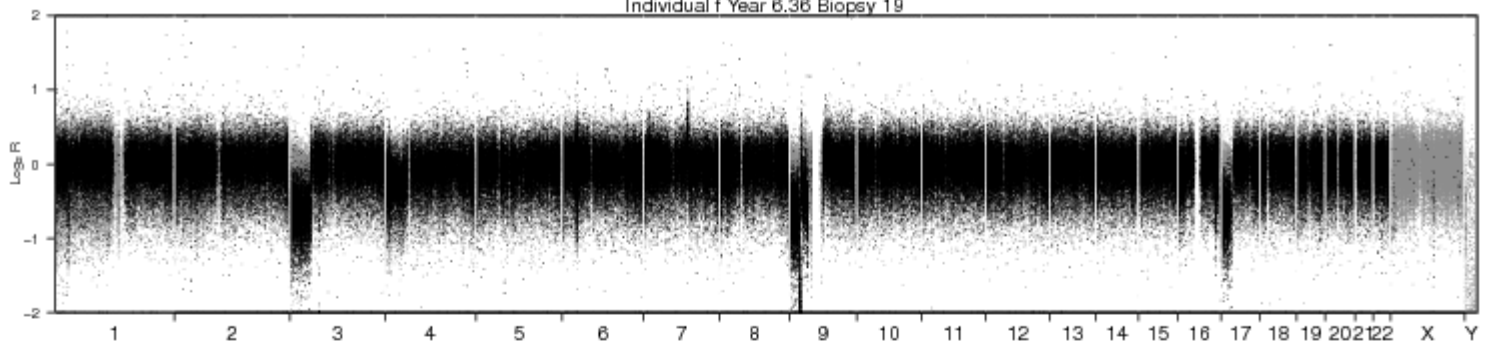

Individual f Year 6.36 Biopsy 19

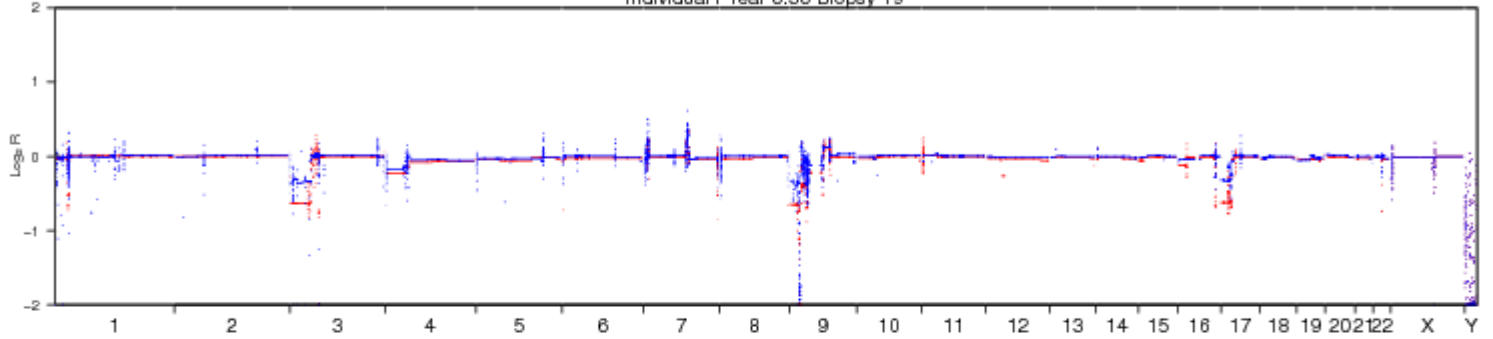

Individual f Year 6.36 Biopsy 19

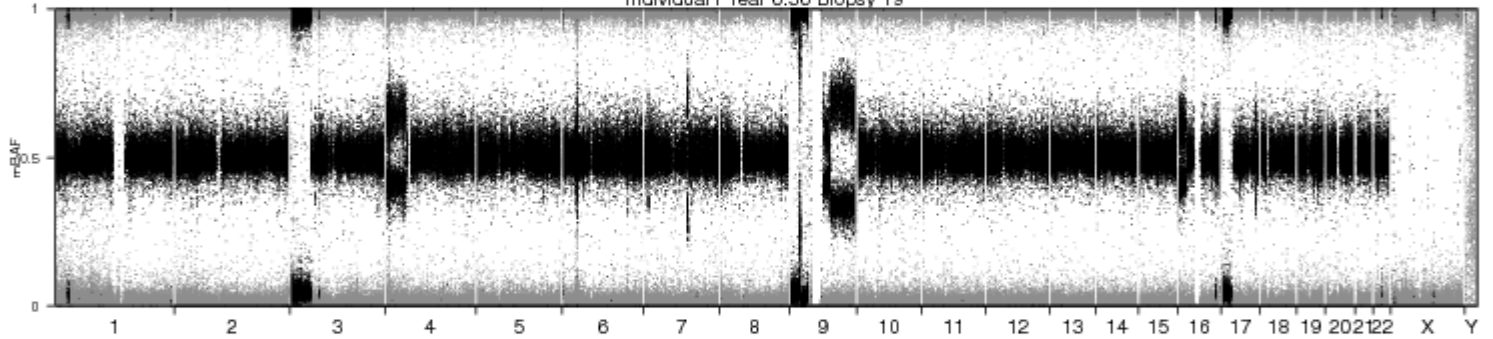

Individual f Year 6.36 Biopsy 19

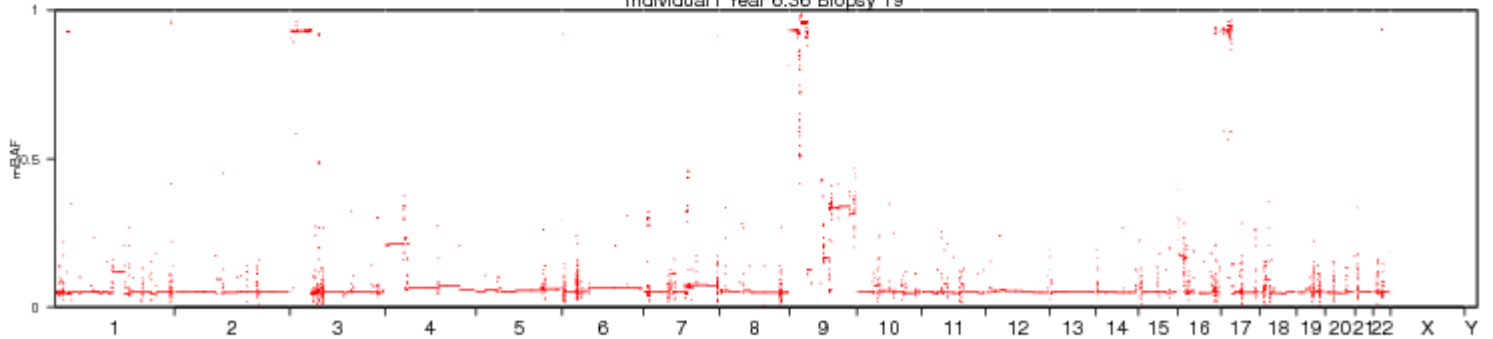

Individual f Year 6.36 Biopsy 19

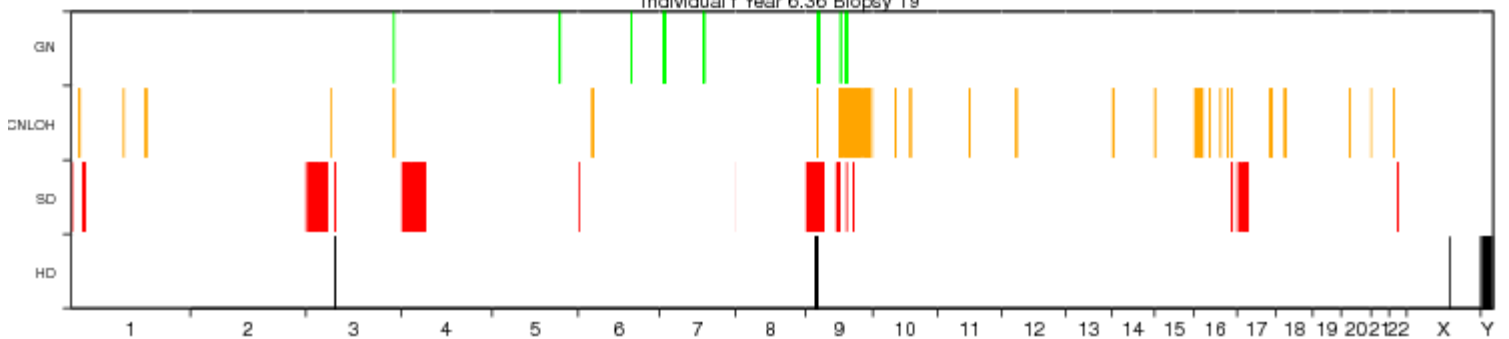



Individual f Year 6.36 Biopsy 20

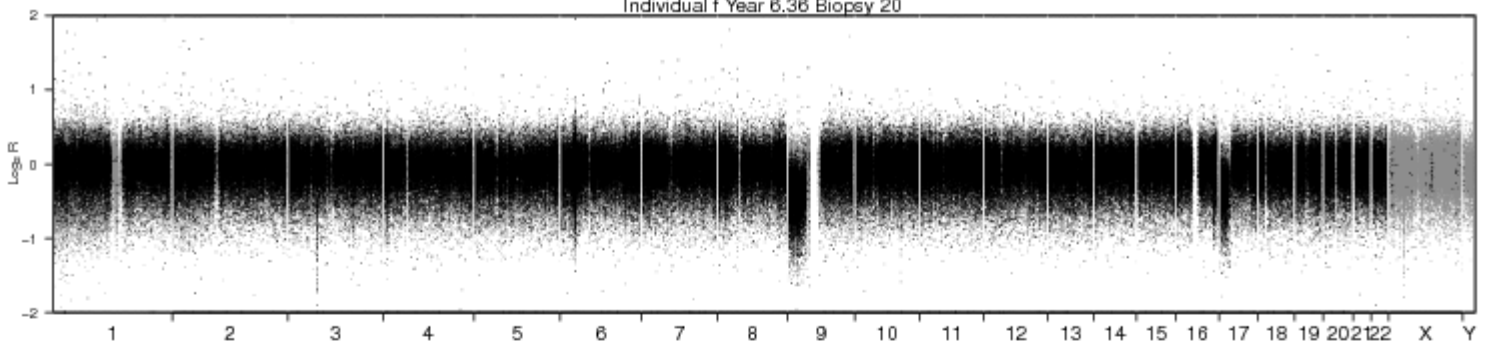

Individual f Year 6.36 Biopsy 20

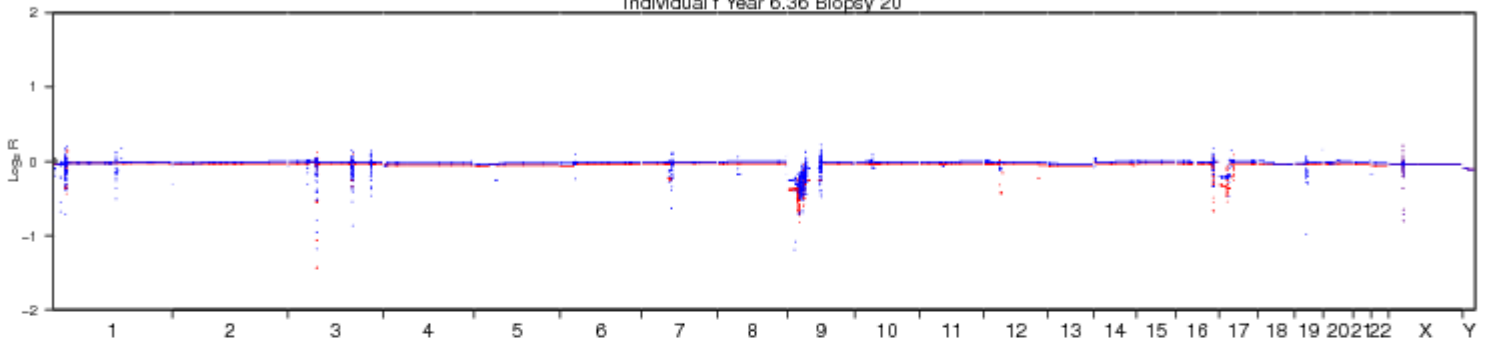

Individual f Year 6.36 Biopsy 20

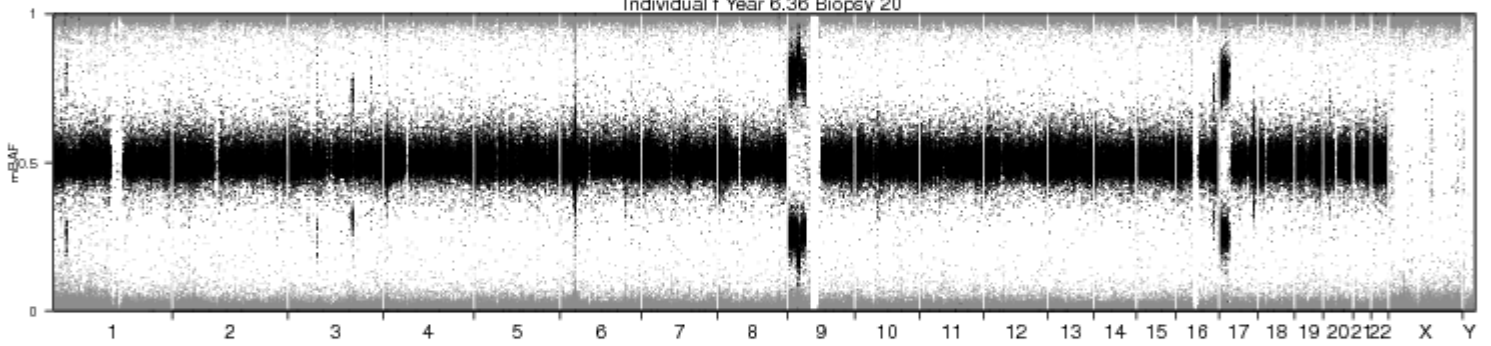

Individual f Year 6.36 Biopsy 20

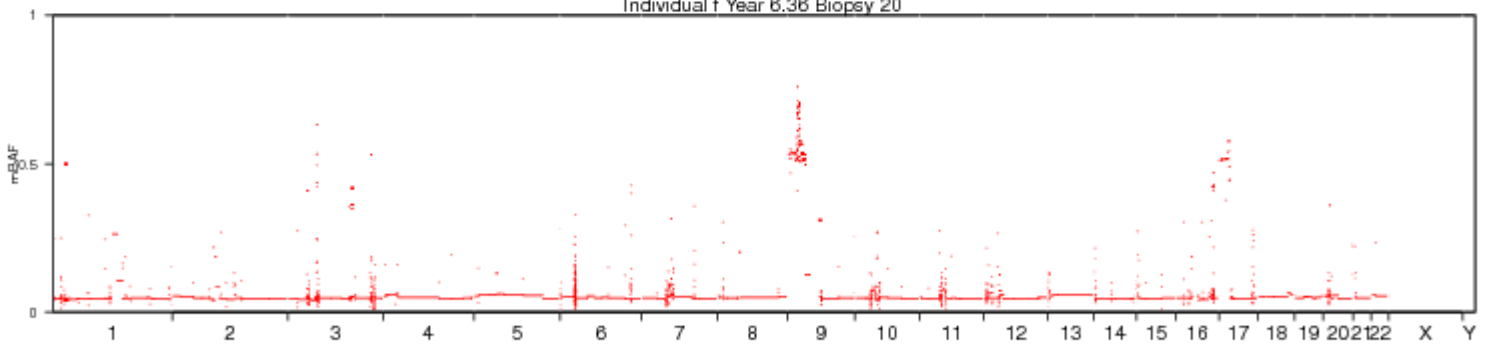

Individual f Year 6.36 Biopsy 20

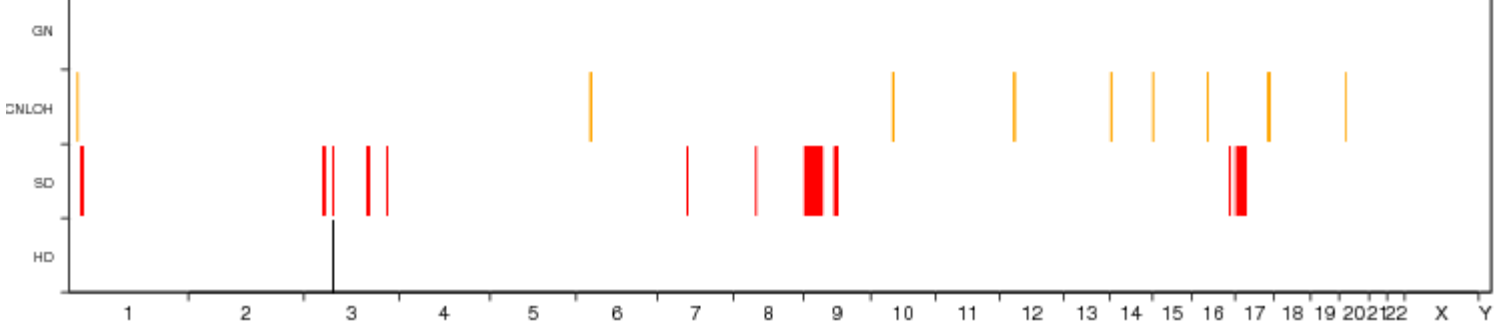

Individual g Year 0 Biopsy 1

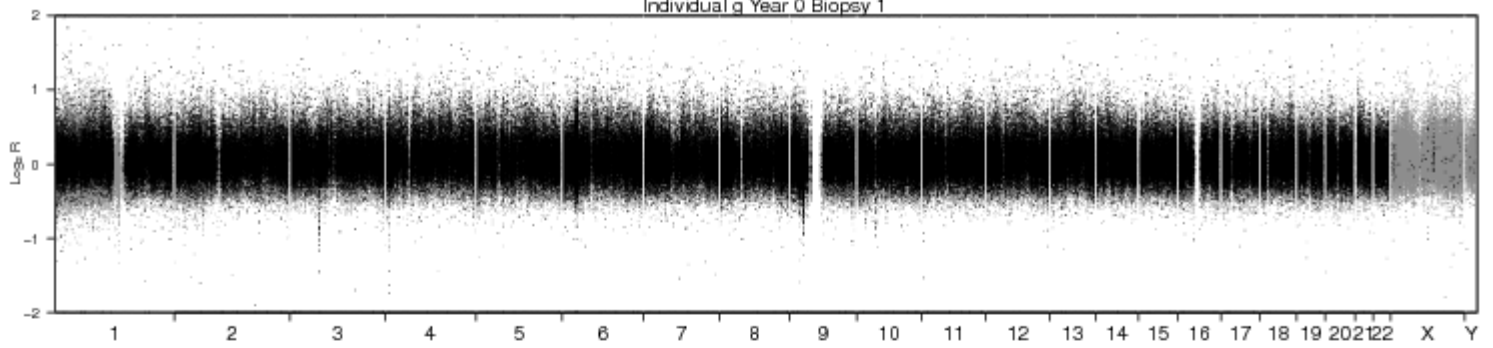

Individual g Year 0 Biopsy 1

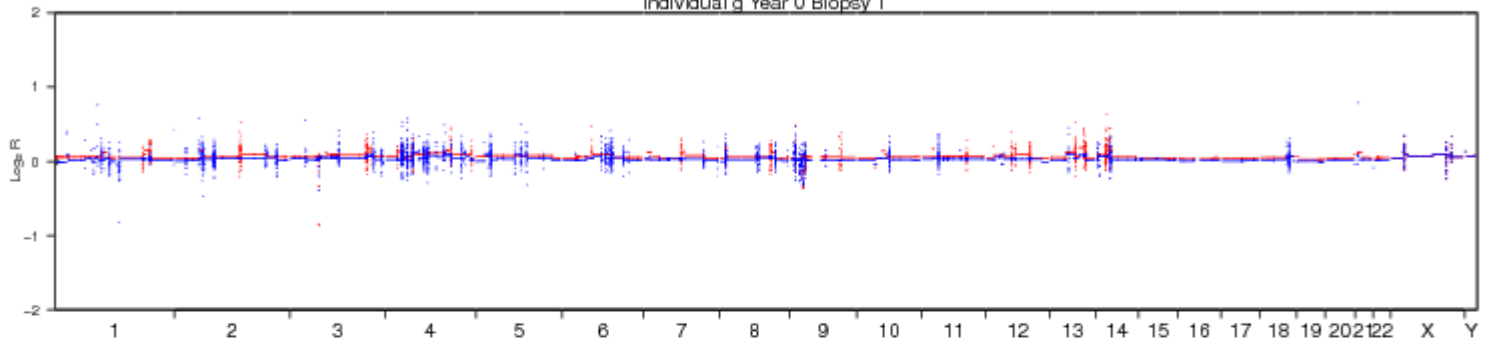

Individual g Year 0 Biopsy 1

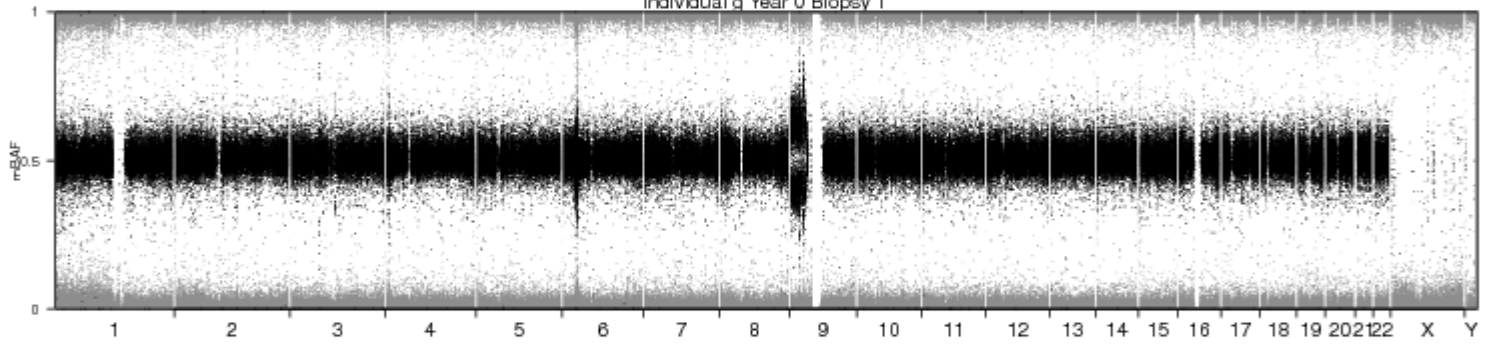

Individual g Year 0 Biopsy 1

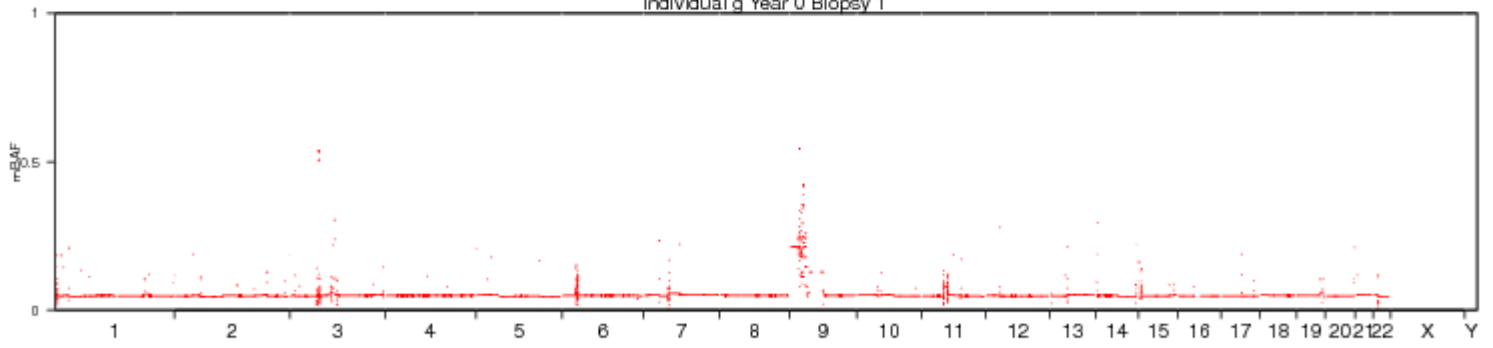

Individual g Year 0 Biopsy 1

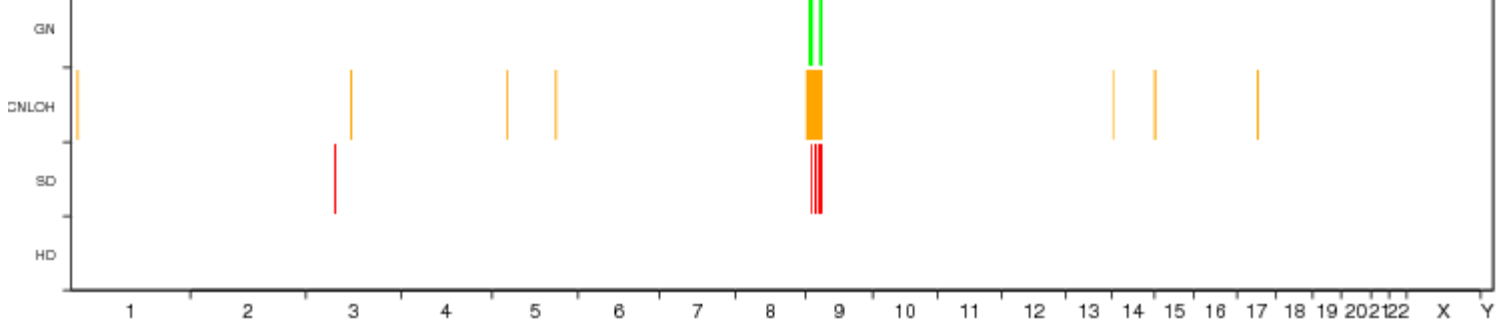

Individual g Year 0 Biopsy 2

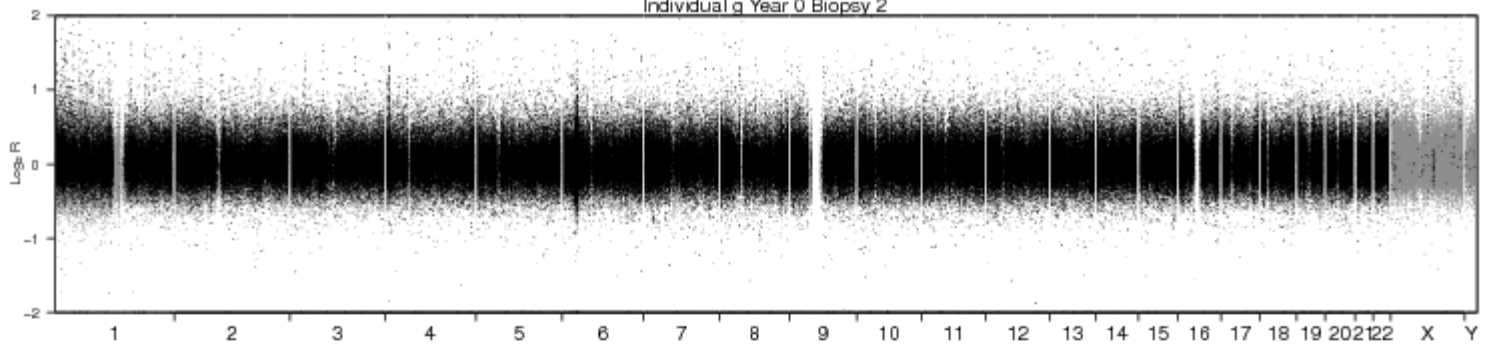

Individual g Year 0 Biopsy 2

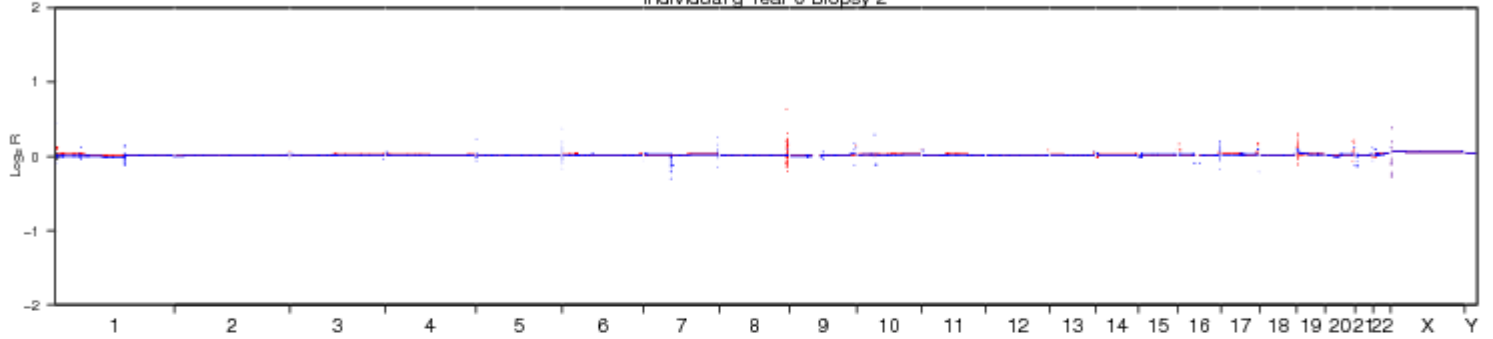

Individual g Year 0 Biopsy 2

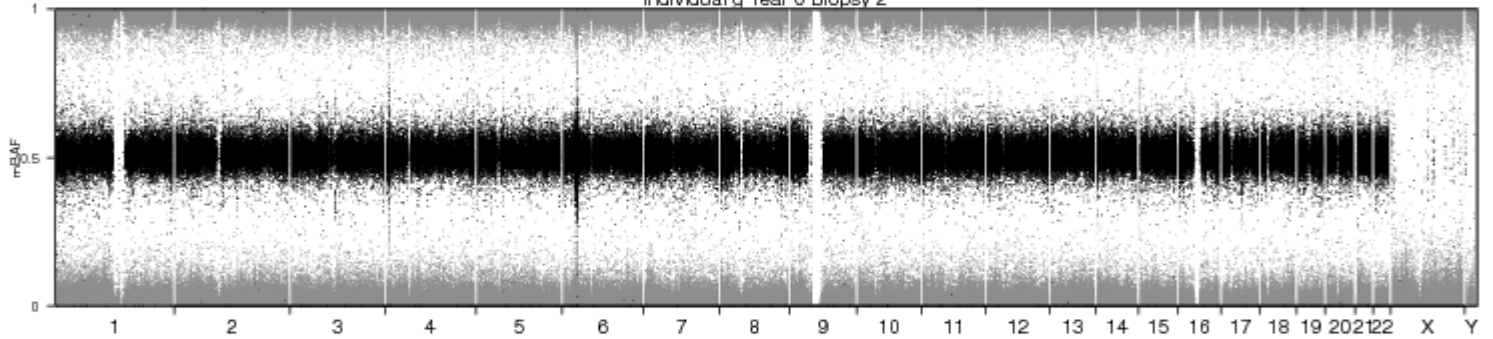

Individual g Year 0 Biopsy 2

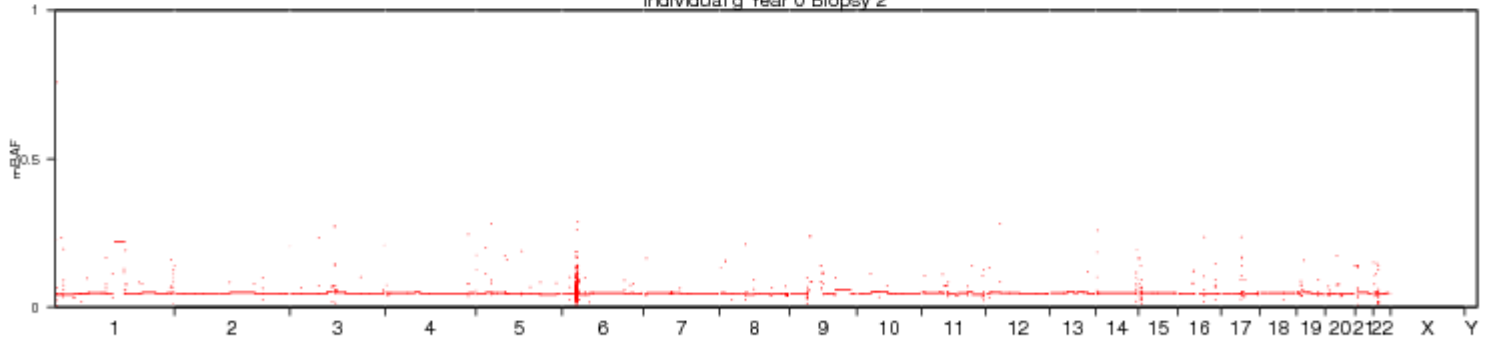

Individual g Year 0 Biopsy 2

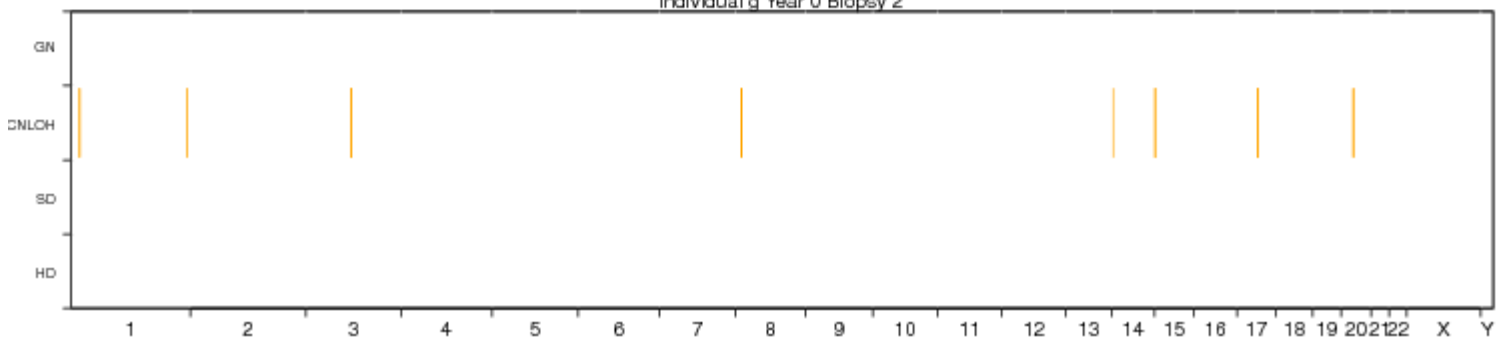

Individual q Year 1.48 Biopsy 3

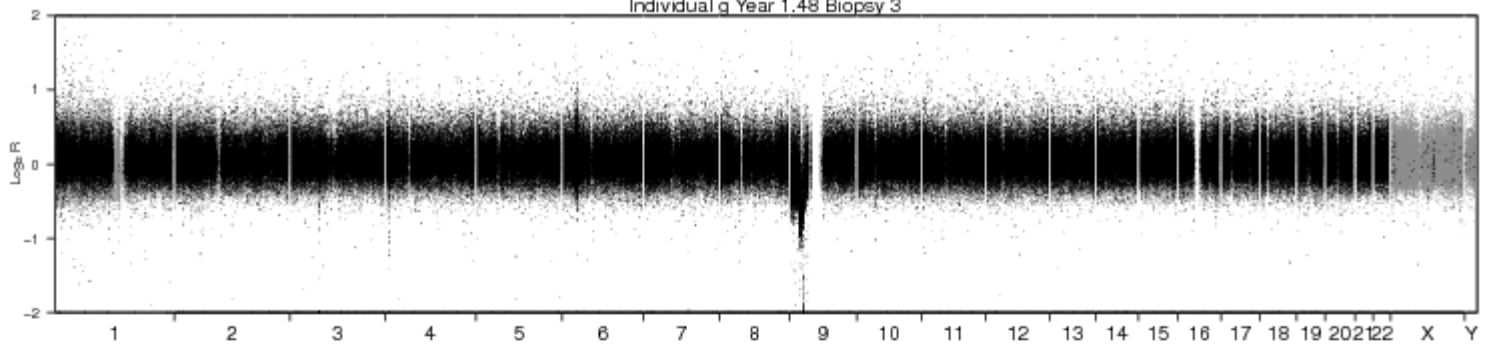

Individual q Year 1.48 Biopsy 3

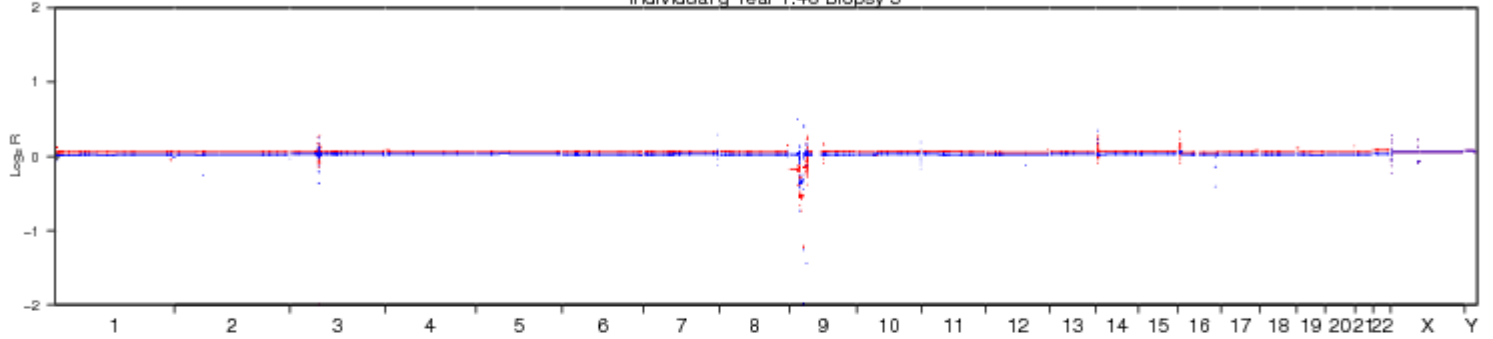

Individual q Year 1.48 Biopsy 3

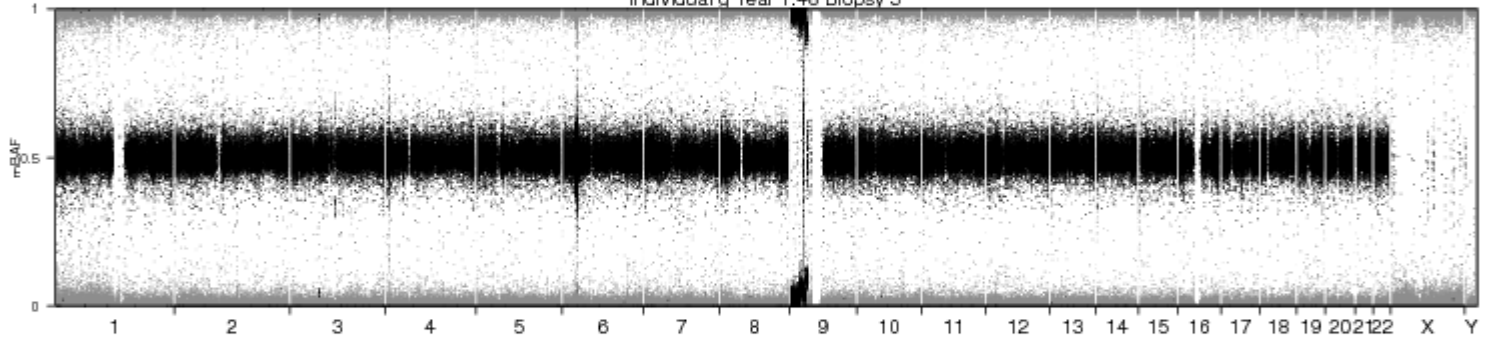

Individual q Year 1.48 Biopsy 3

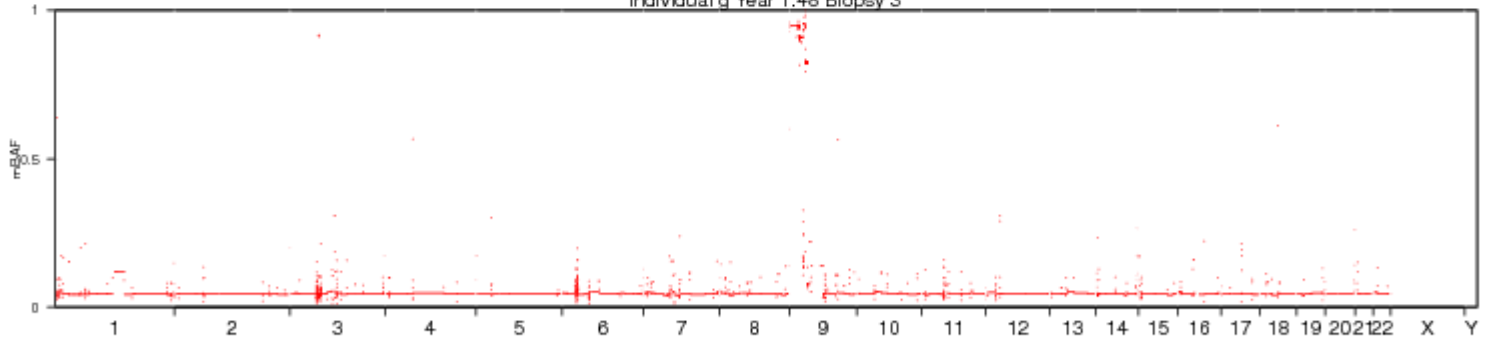

Individual q Year 1.48 Biopsy 3

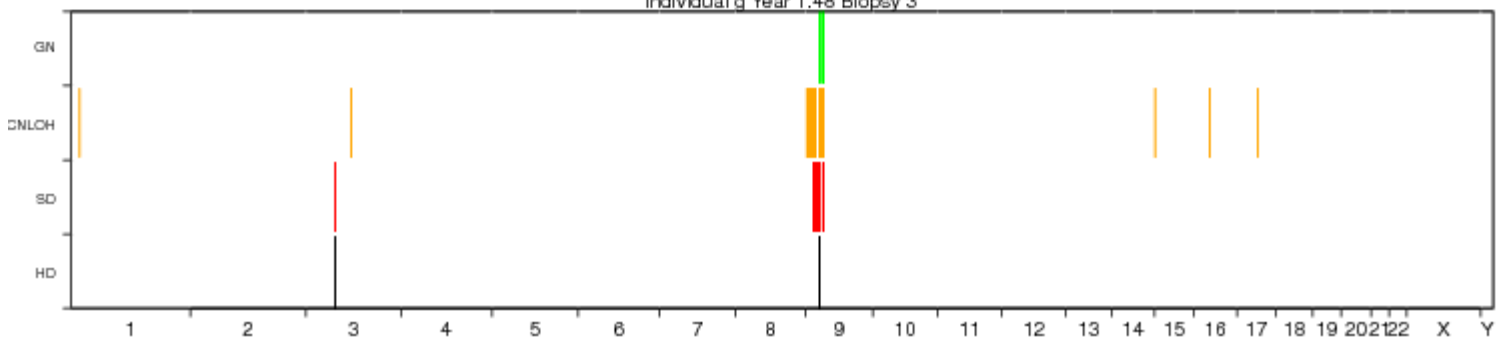



Individual q Year 1.48 Biopsy 4

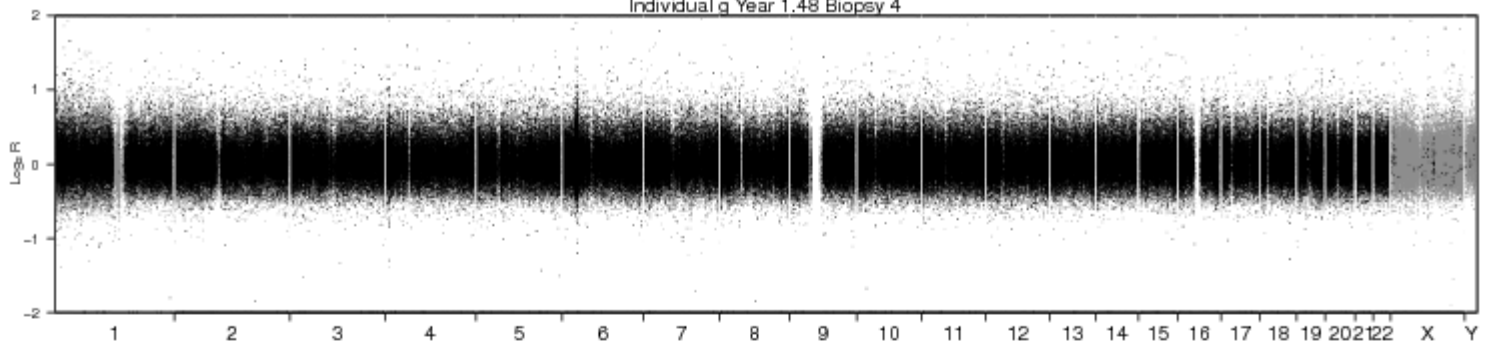

Individual q Year 1.48 Biopsy 4

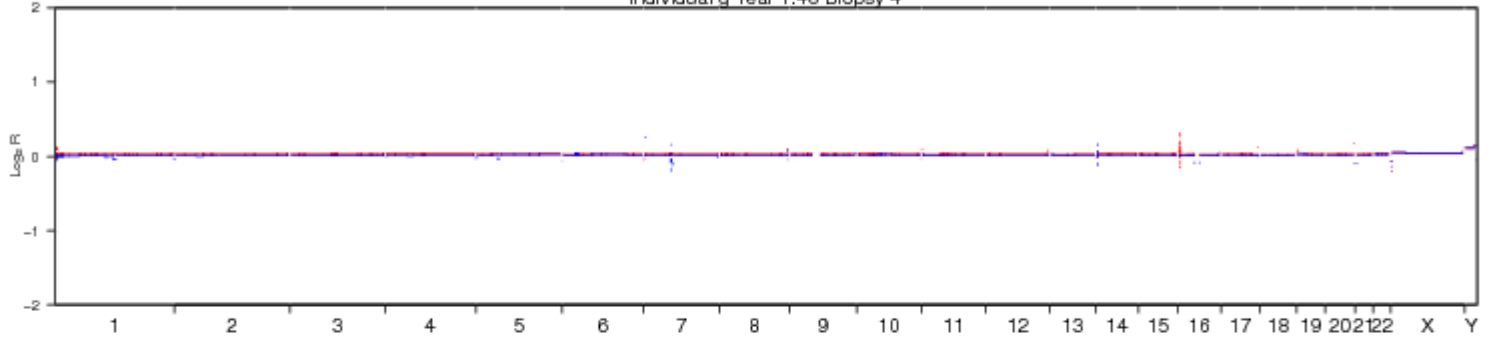

Individual q Year 1.48 Biopsy 4

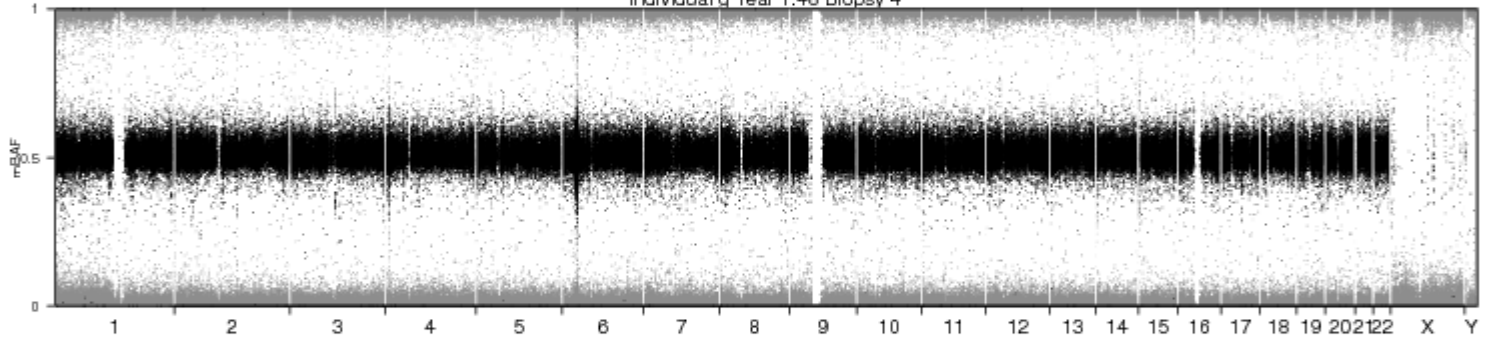

Individual q Year 1.48 Biopsy 4

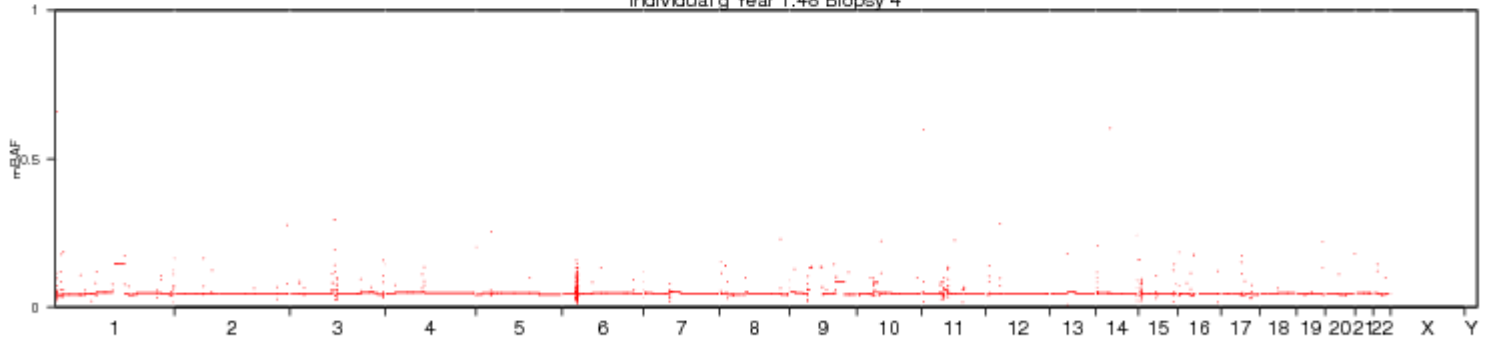

Individual q Year 1.48 Biopsy 4

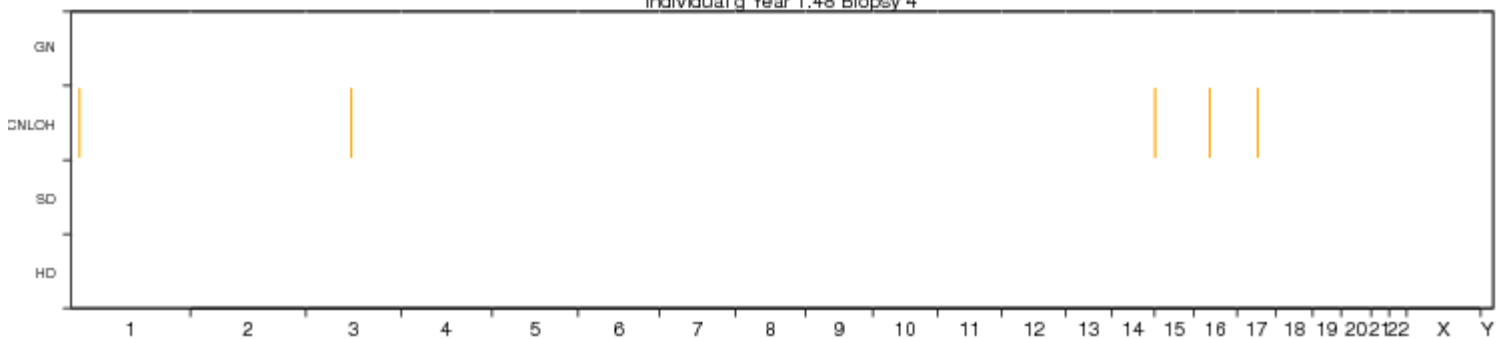

Individual q Year 2.54 Biopsy 5

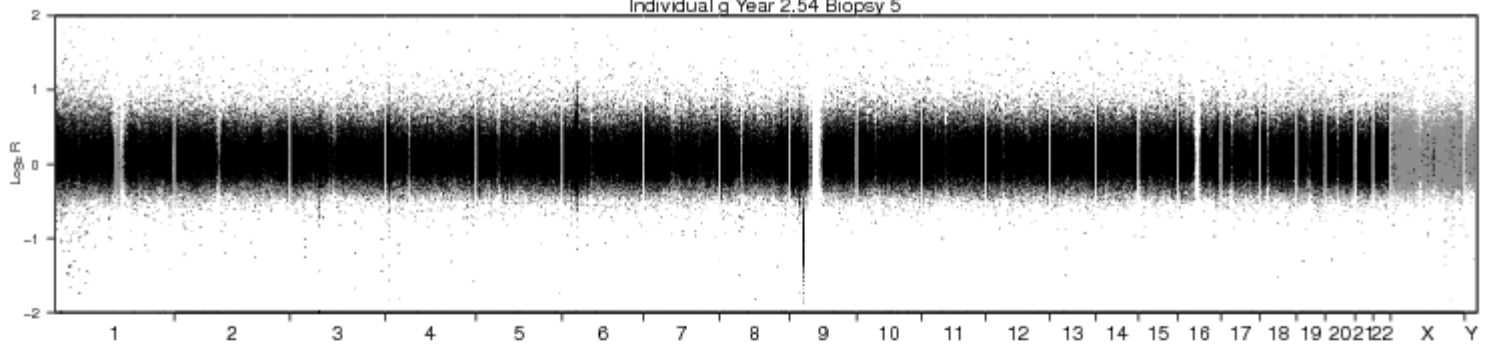

Individual q Year 2.54 Biopsy 5

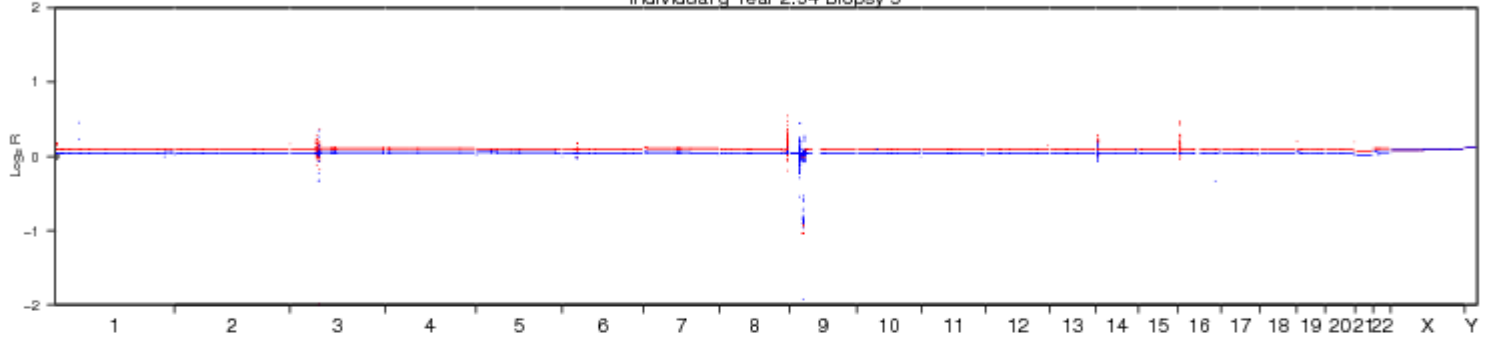

Individual q Year 2.54 Biopsy 5

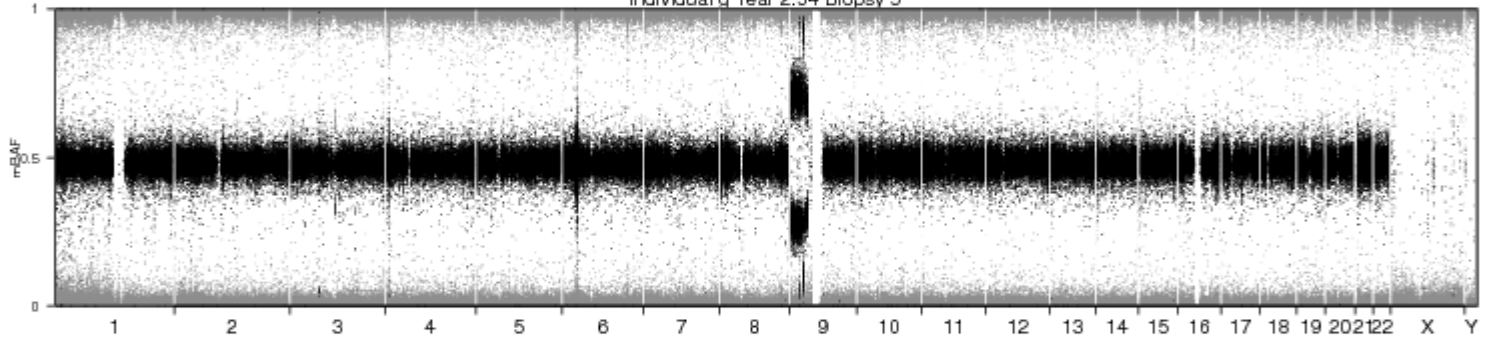

Individual q Year 2.54 Biopsy 5

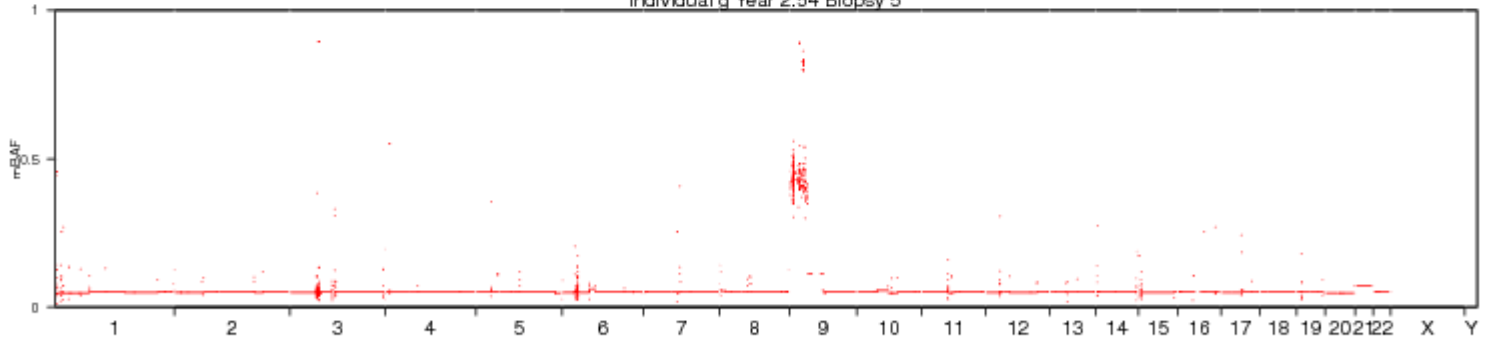

Individual q Year 2.54 Biopsy 5

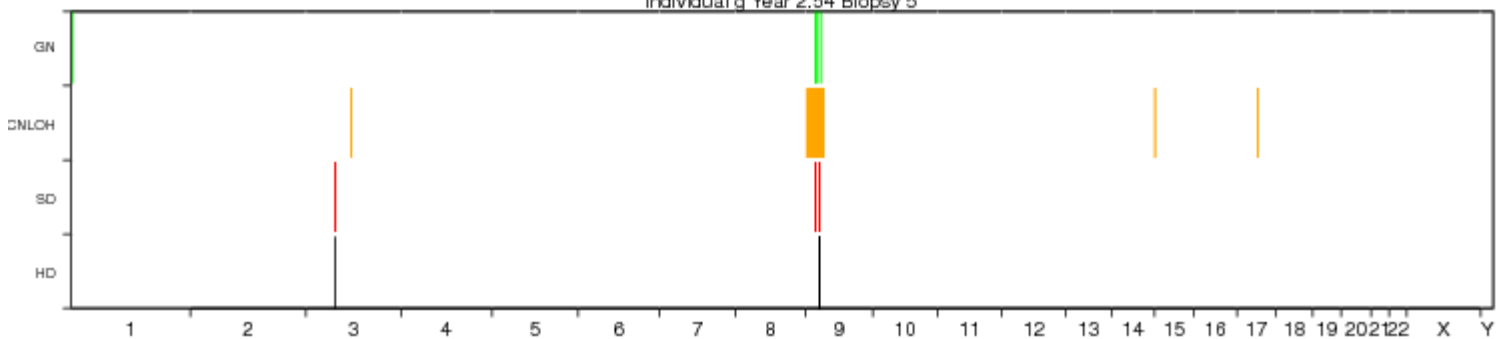

Individual q Year 2.54 Biopsy 6

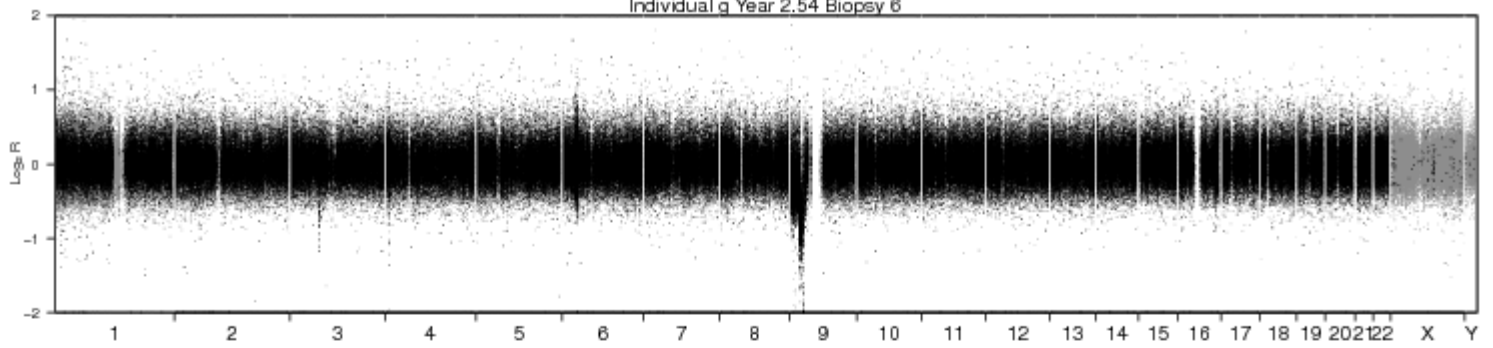

Individual q Year 2.54 Biopsy 6

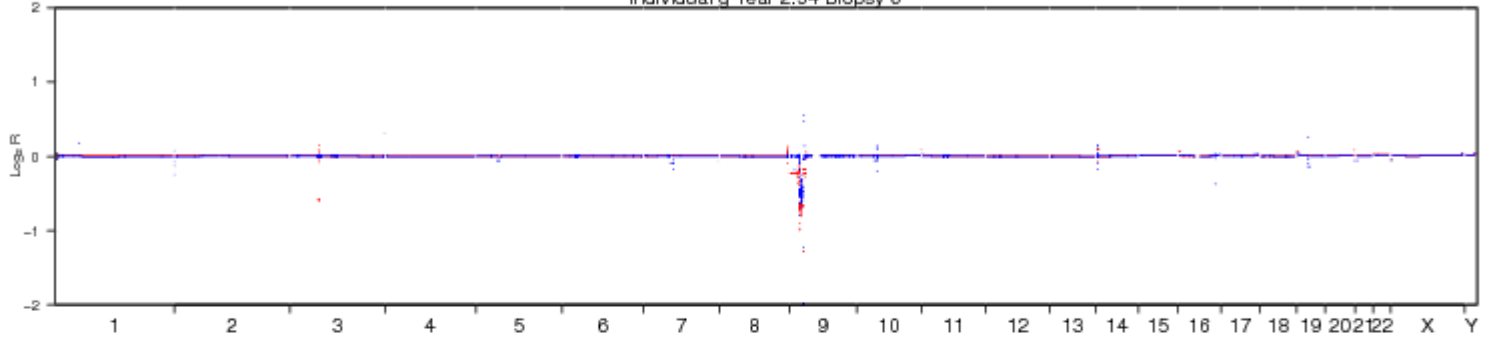

Individual q Year 2.54 Biopsy 6

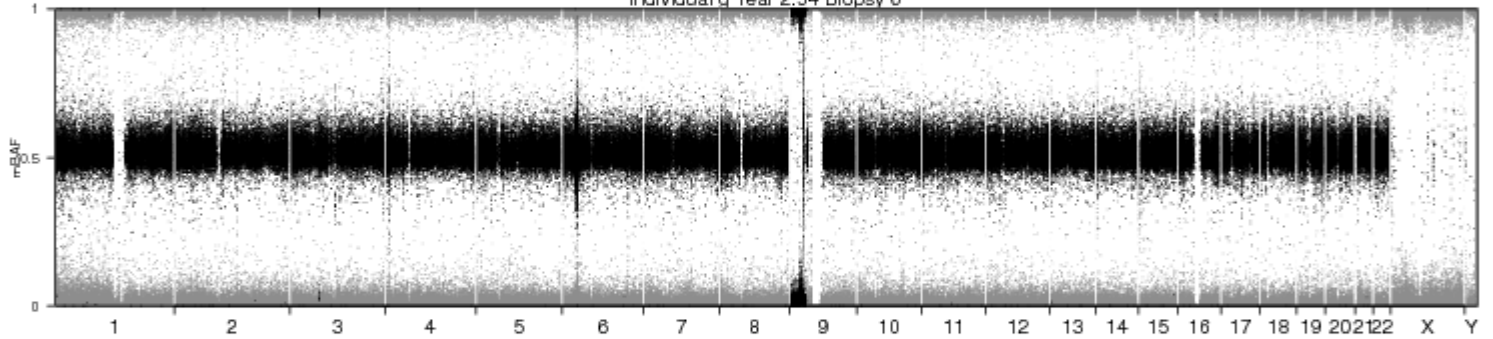

Individual q Year 2.54 Biopsy 6

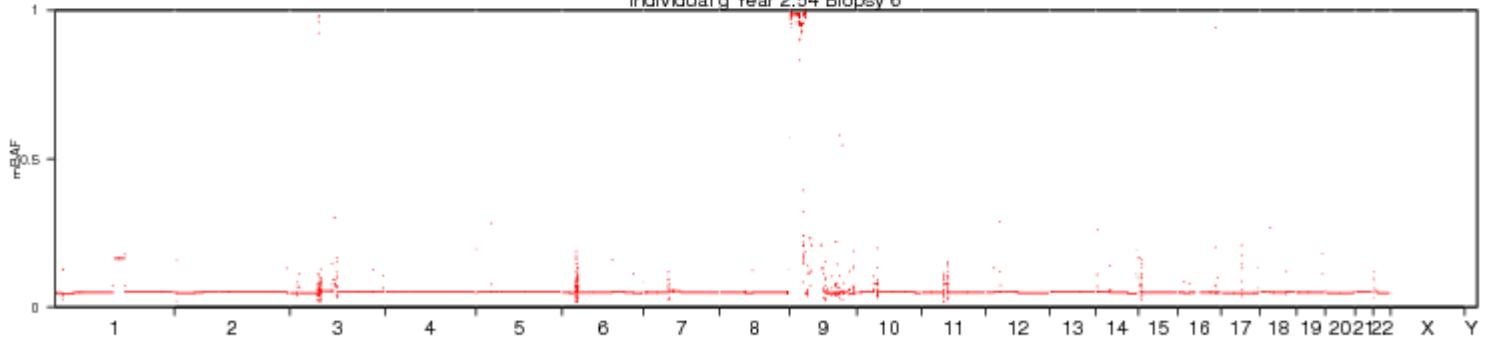

Individual q Year 2.54 Biopsy 6

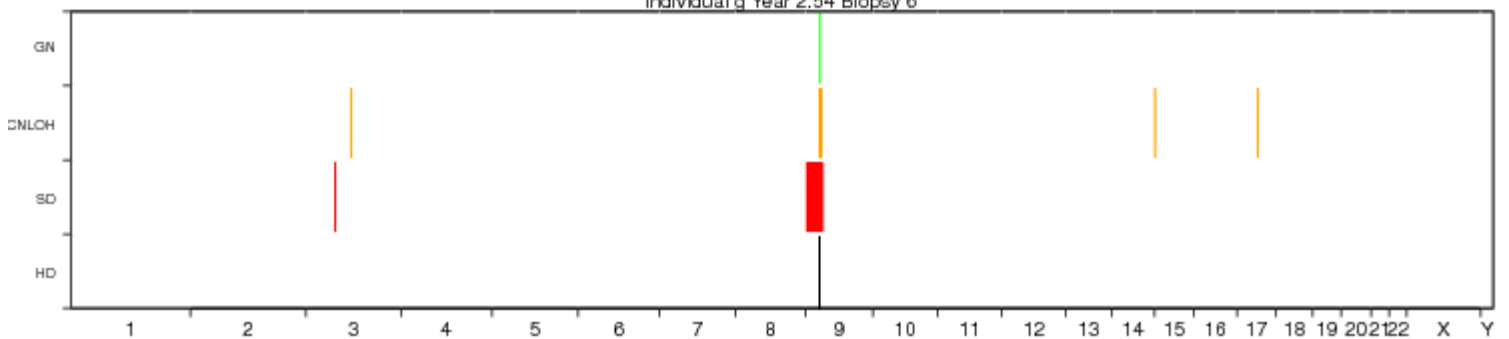

Individual q Year 7.46 Biopsy 7

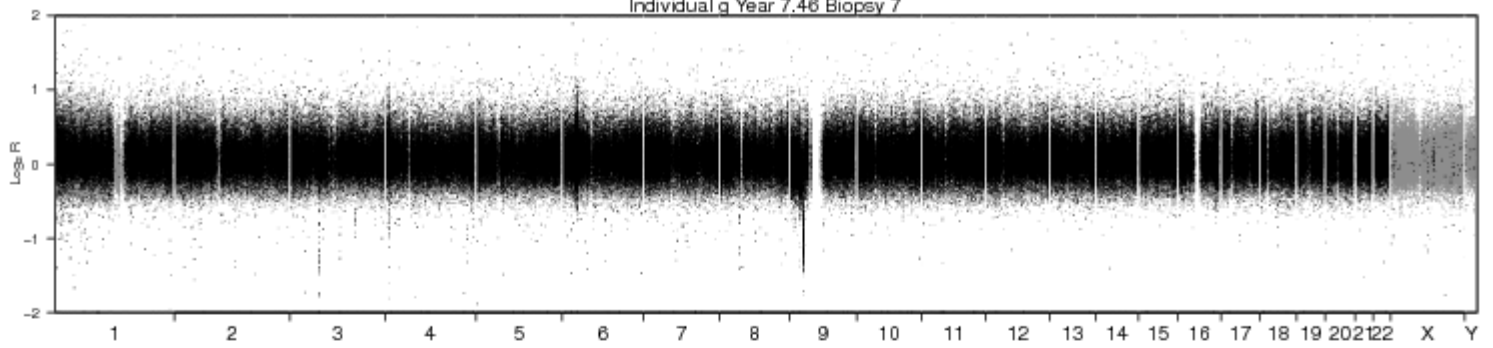

Individual q Year 7.46 Biopsy 7

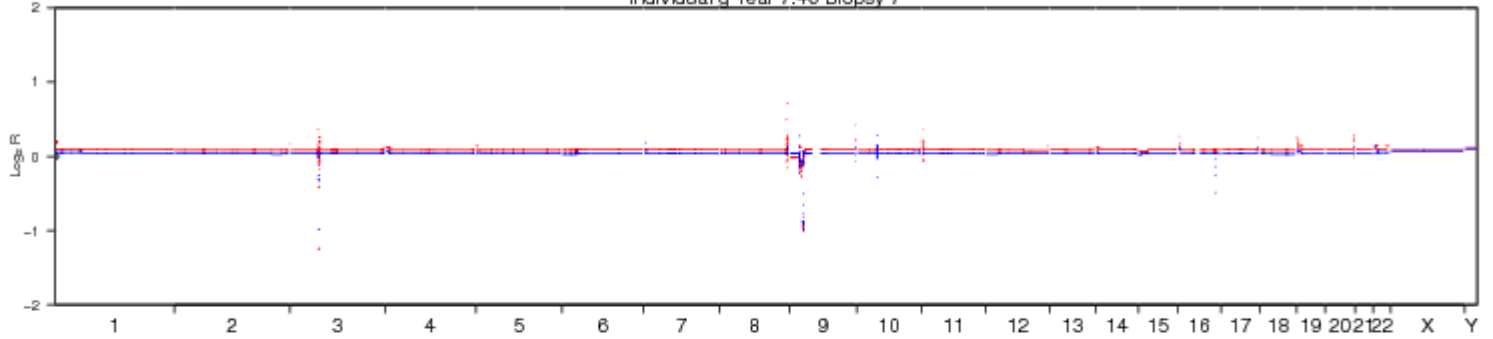

Individual q Year 7.46 Biopsy 7

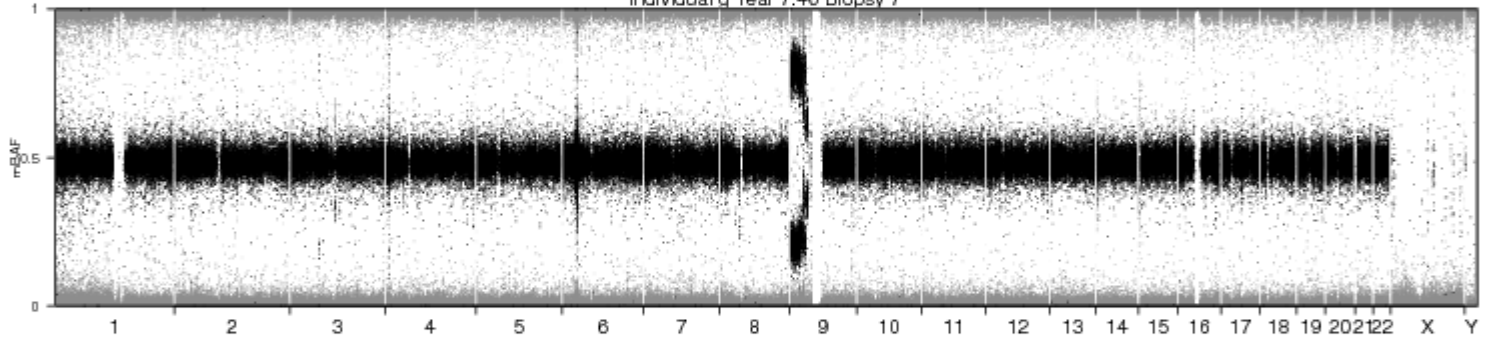

Individual q Year 7.46 Biopsy 7

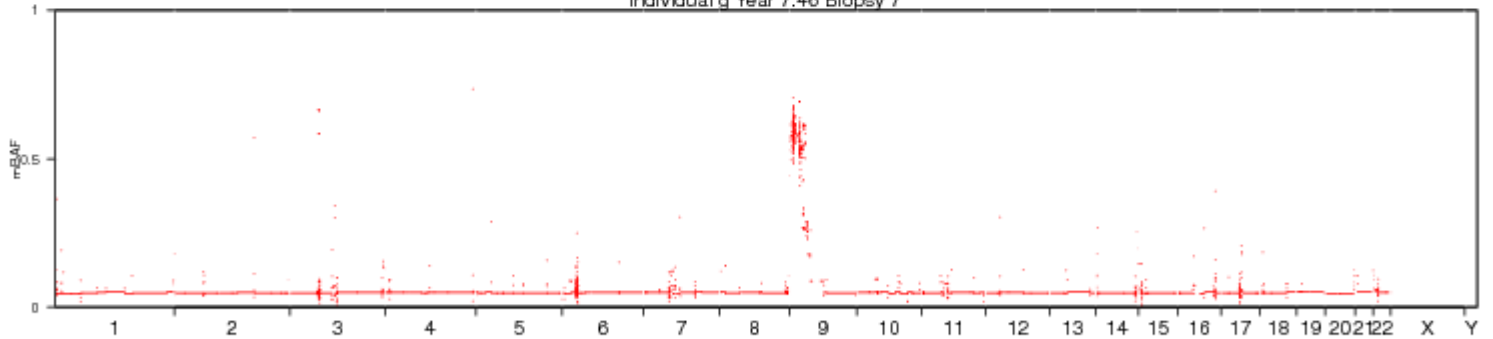

Individual q Year 7.46 Biopsy 7

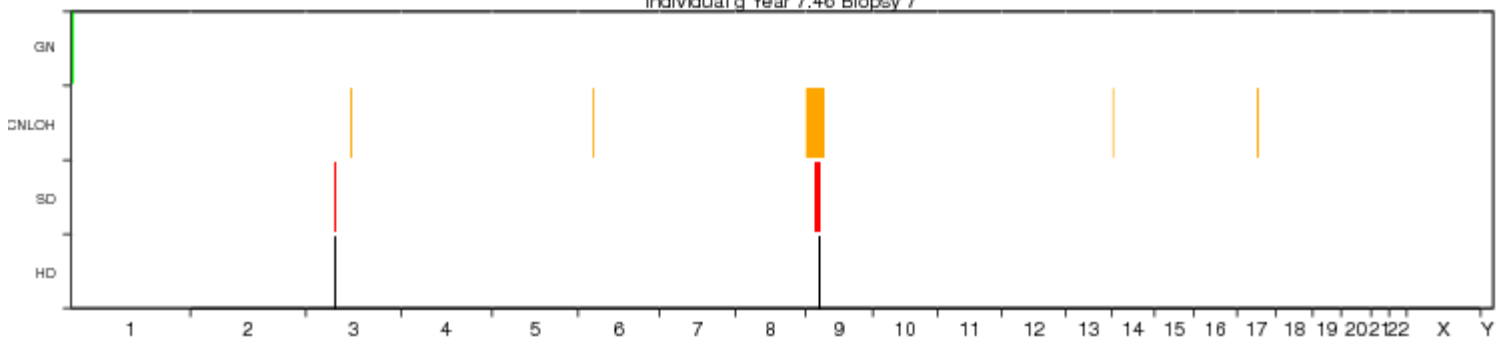



Individual q Year 7.46 Biopsy 8

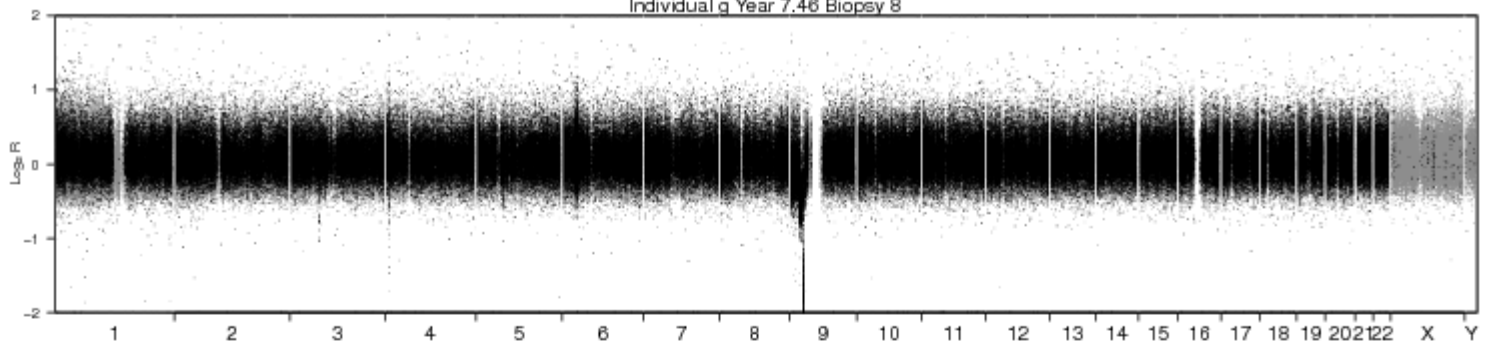

Individual q Year 7.46 Biopsy 8

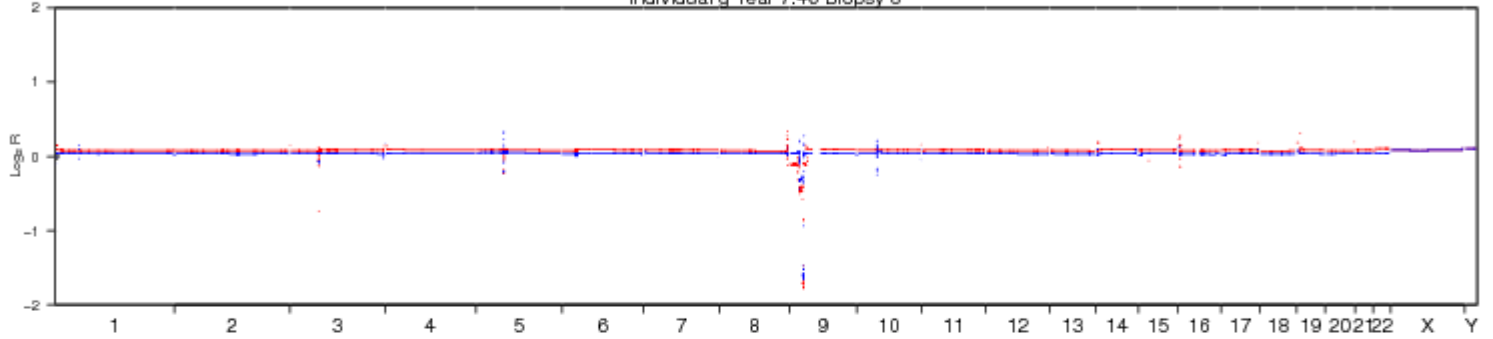

Individual q Year 7.46 Biopsy 8

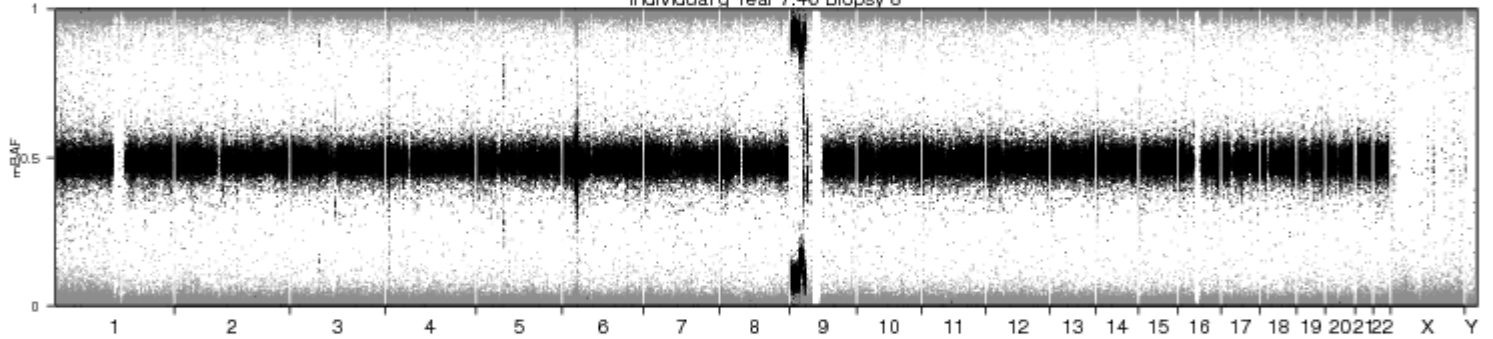

Individual q Year 7.46 Biopsy 8

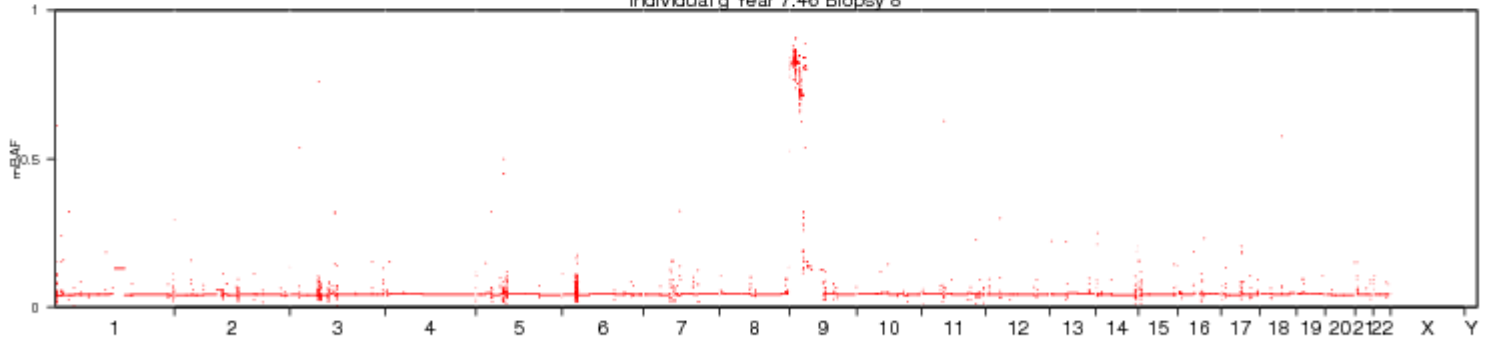

Individual q Year 7.46 Biopsy 8

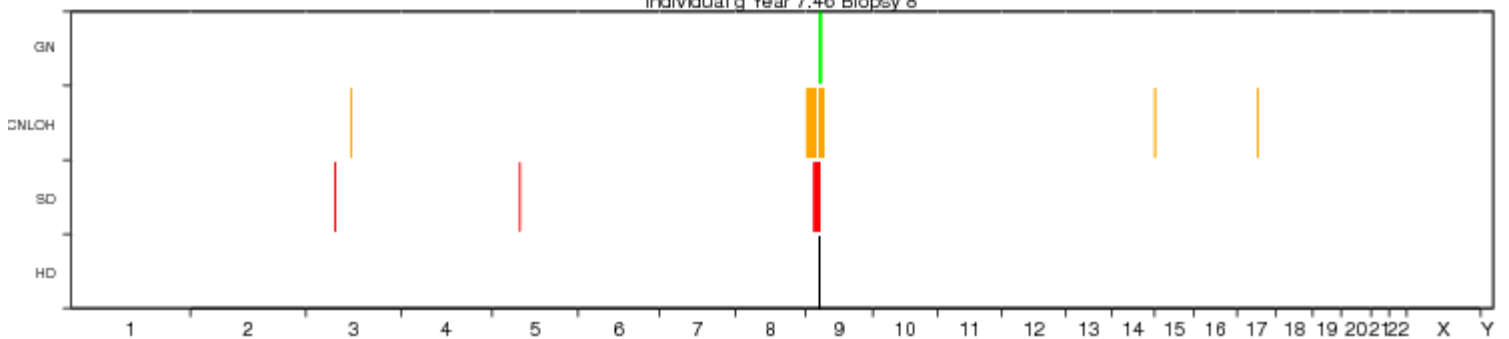

Individual q Year 8.92 Biopsy 9

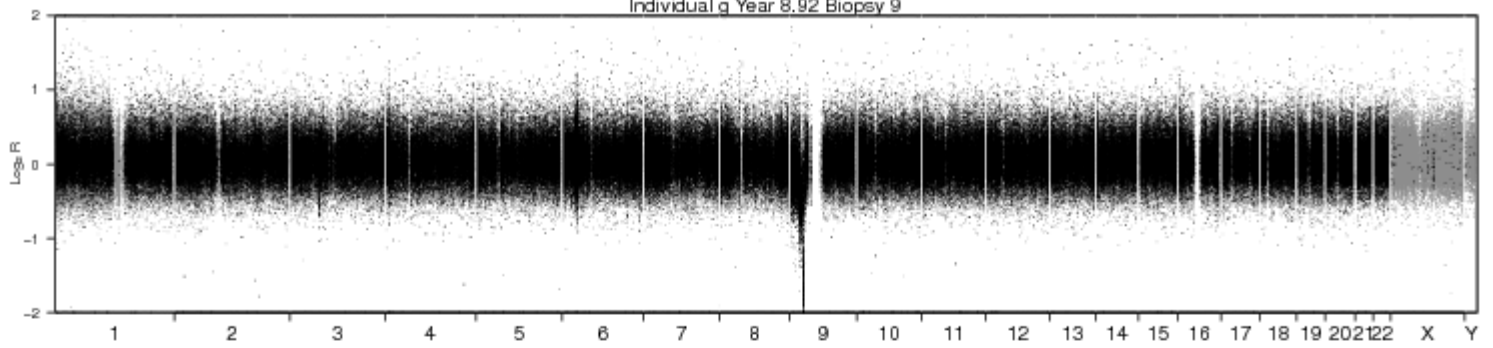

Individual q Year 8.92 Biopsy 9

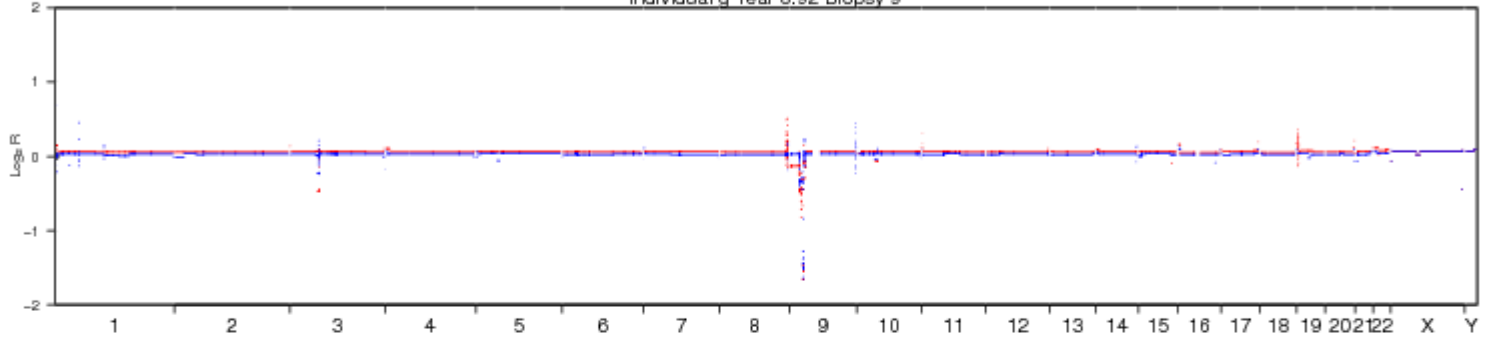

Individual q Year 8.92 Biopsy 9

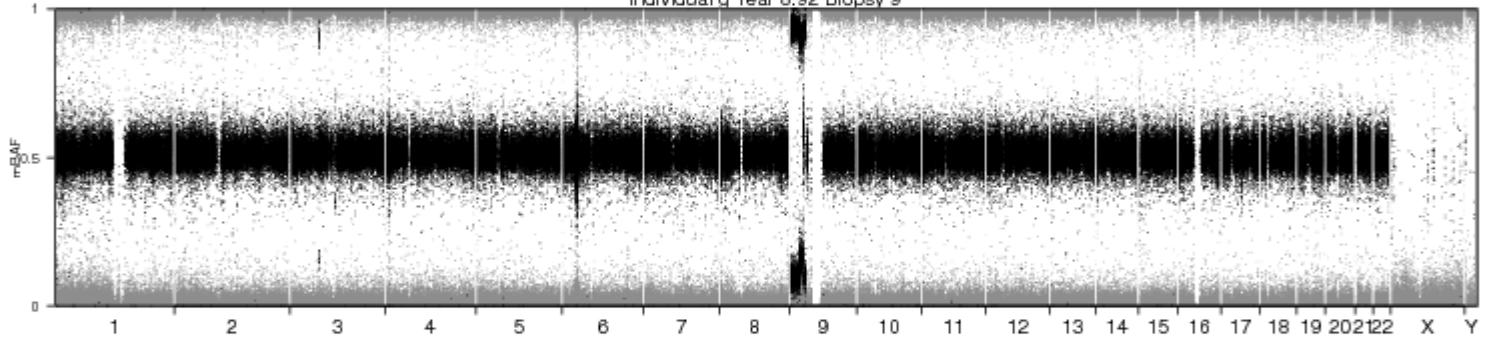

Individual q Year 8.92 Biopsy 9

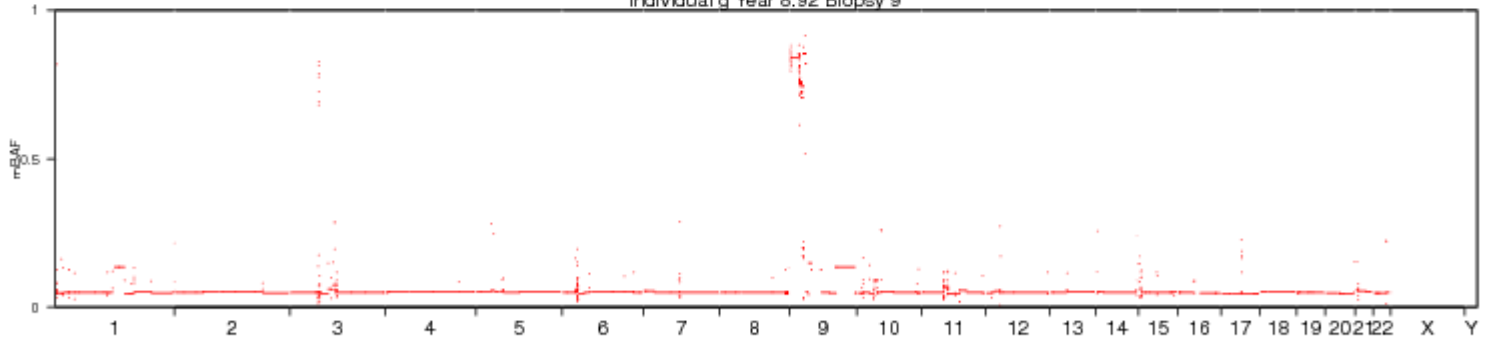

Individual q Year 8.92 Biopsy 9

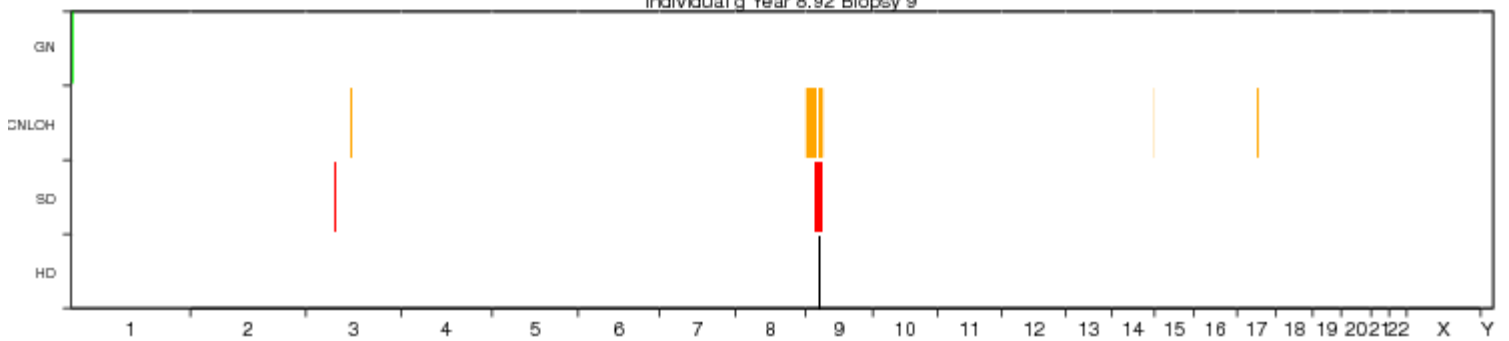

Individual q Year 8.92 Biopsy 10

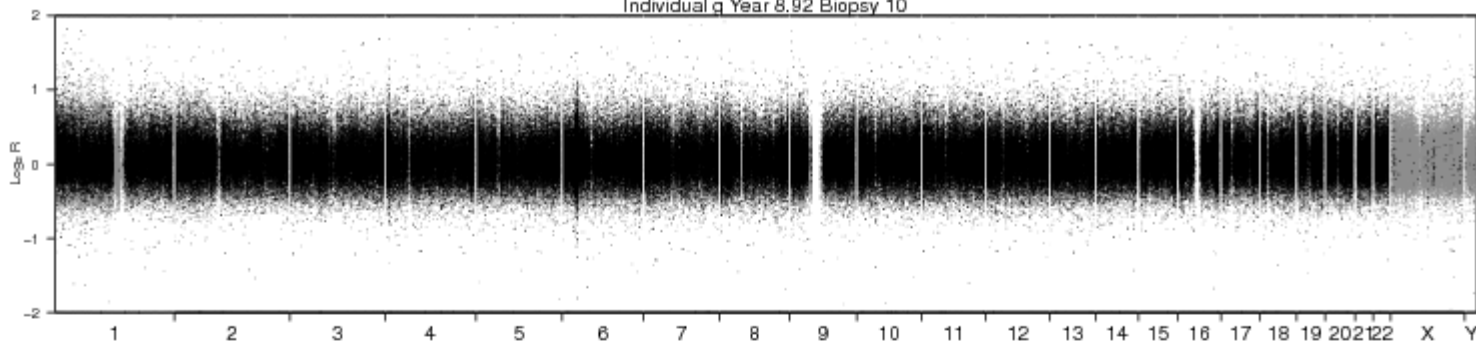

Individual q Year 8.92 Biopsy 10

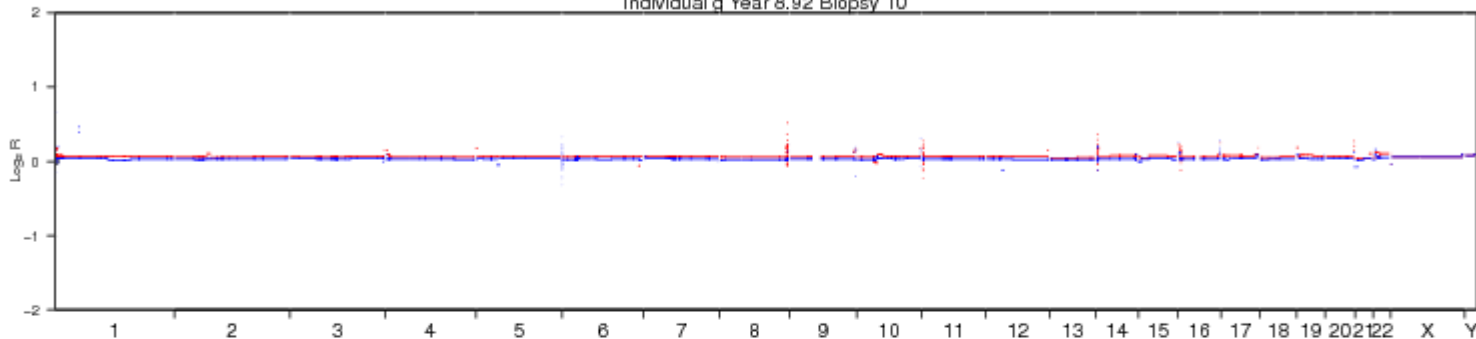

Individual q Year 8.92 Biopsy 10

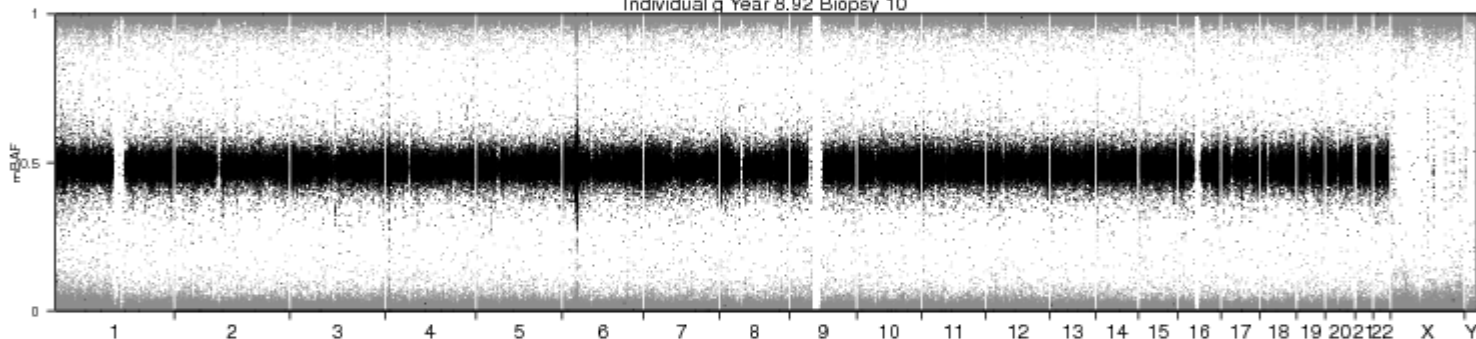

Individual q Year 8.92 Biopsy 10

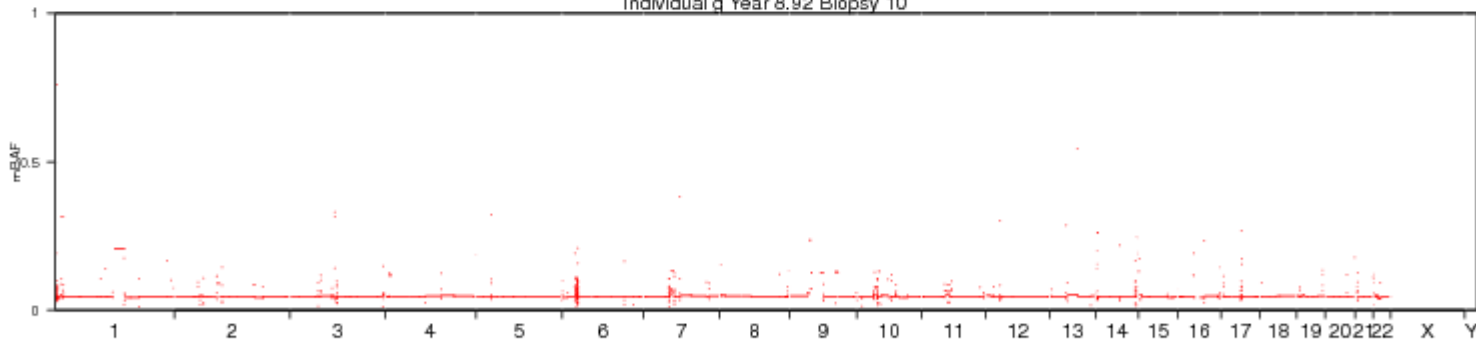

Individual q Year 8.92 Biopsy 10

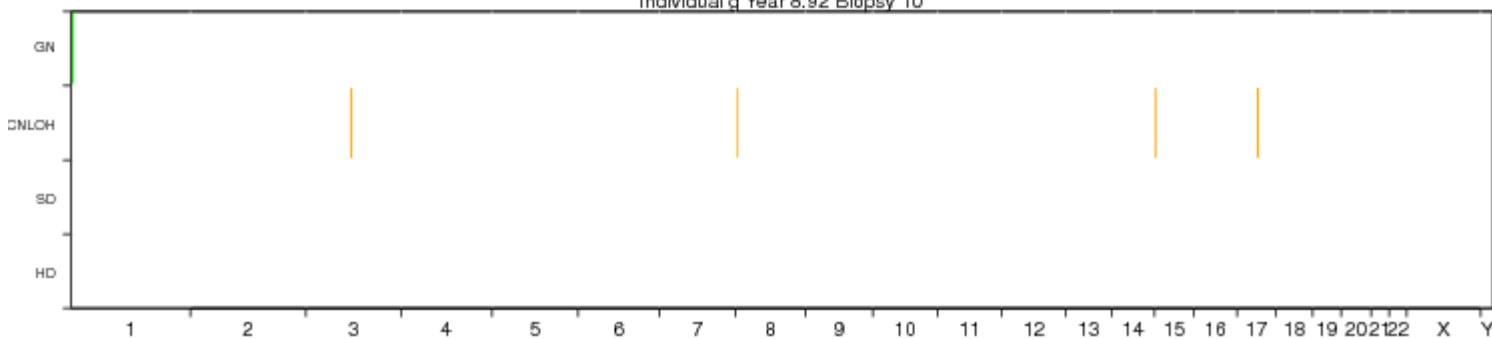

Individual g Year 12.24 Biopsy 11

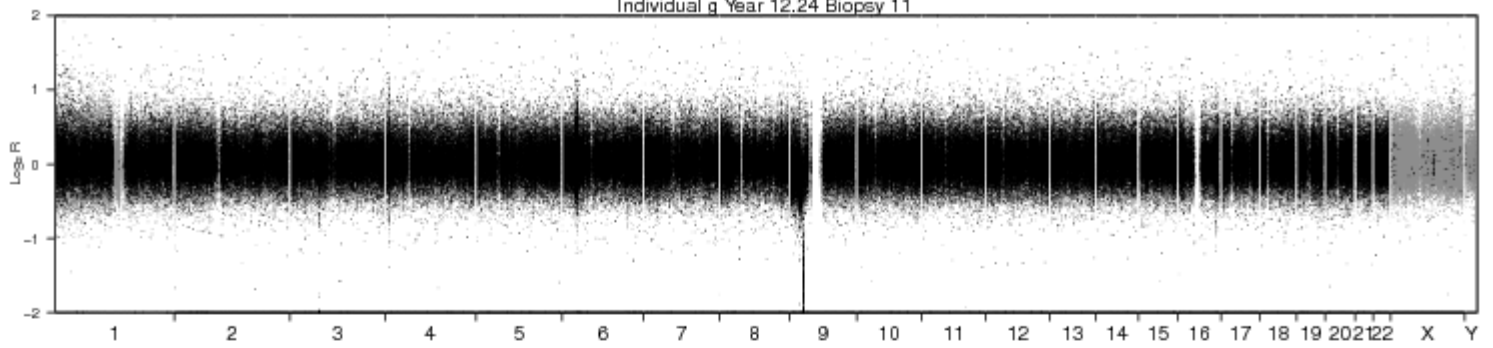

Individual g Year 12.24 Biopsy 11

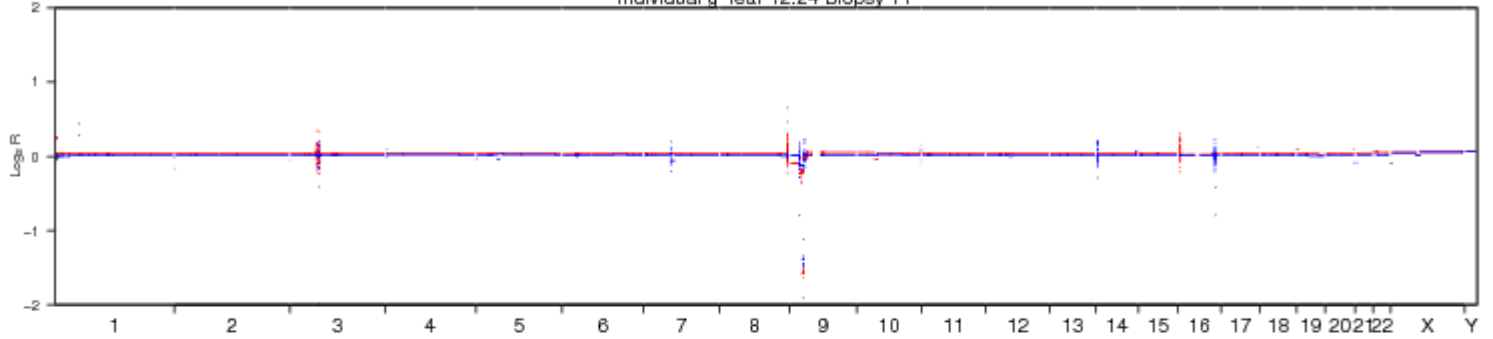

Individual g Year 12.24 Biopsy 11

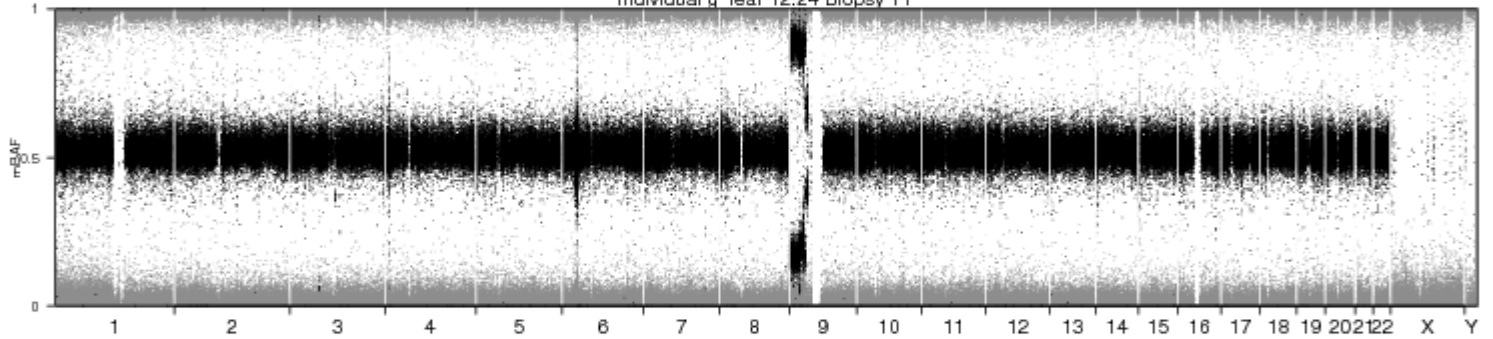

Individual g Year 12.24 Biopsy 11

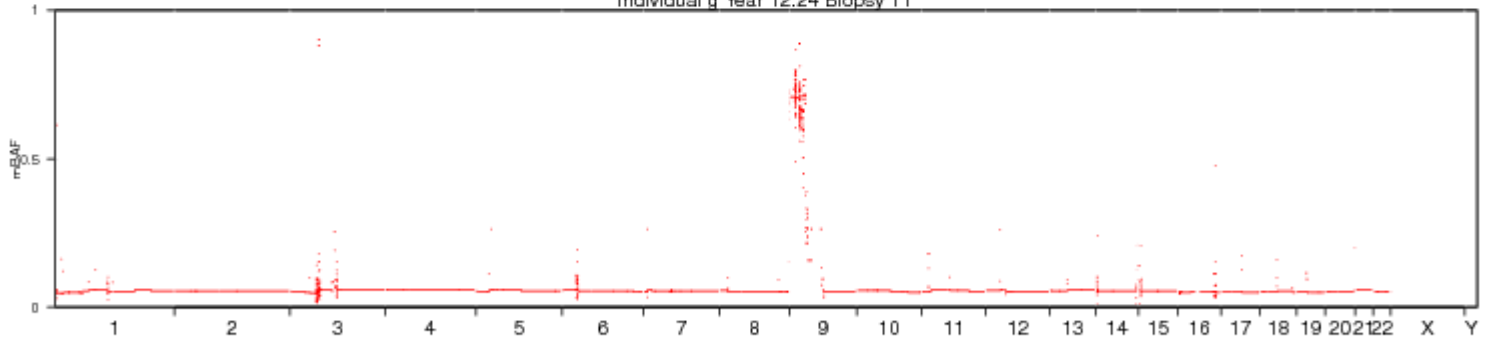

Individual g Year 12.24 Biopsy 11

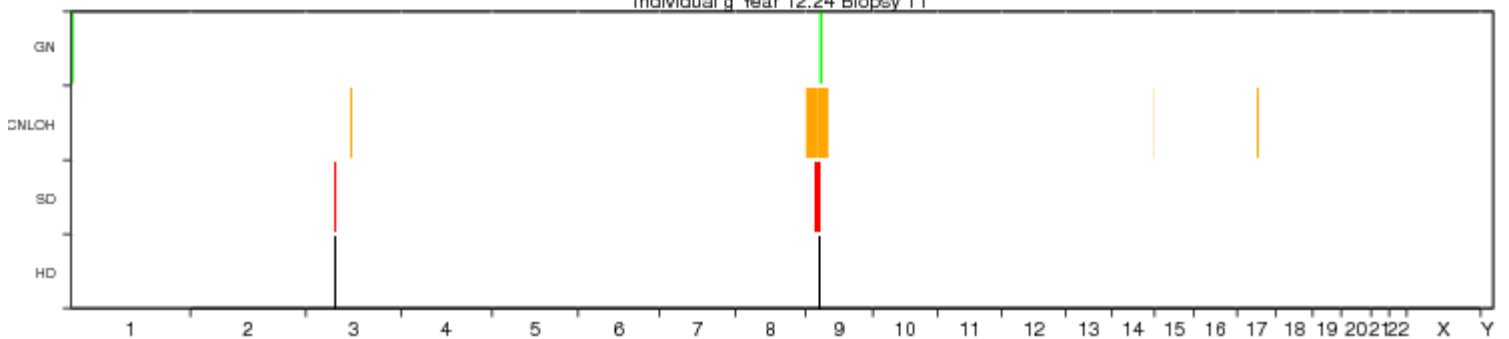



Individual g Year 12.24 Biopsy 12

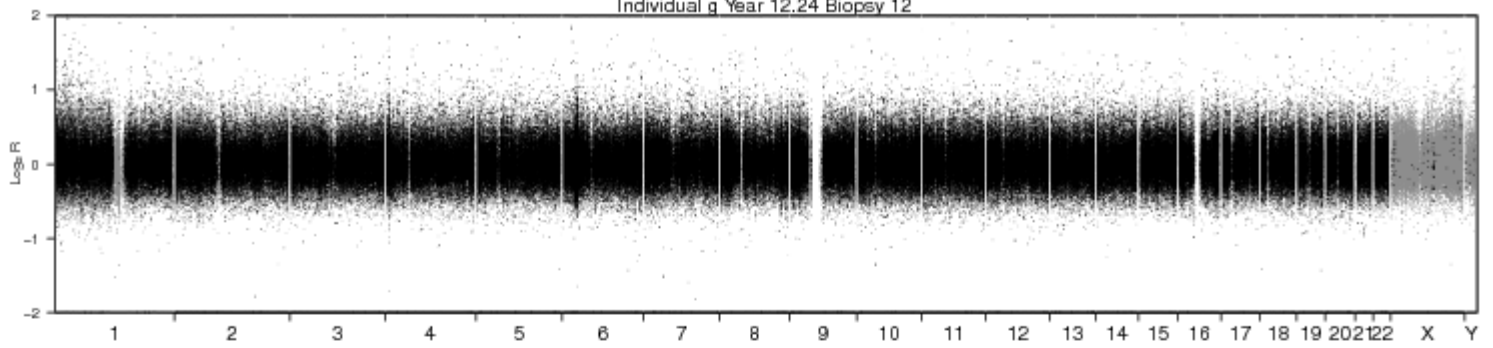

Individual g Year 12.24 Biopsy 12

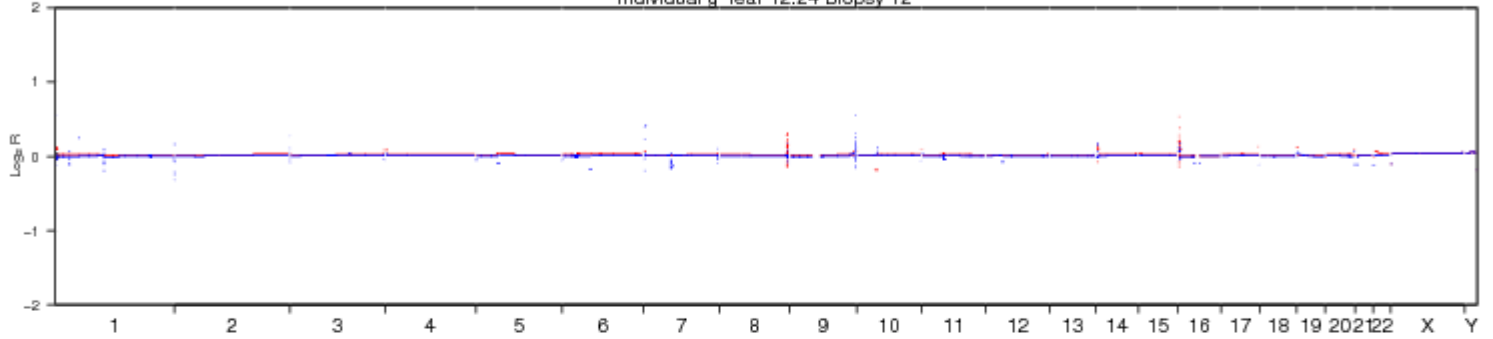

Individual g Year 12.24 Biopsy 12

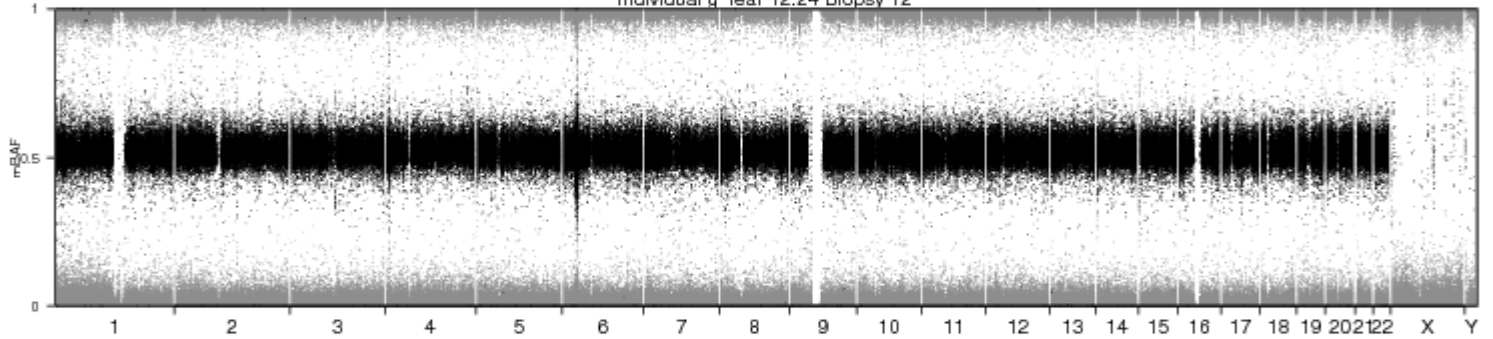

Individual g Year 12.24 Biopsy 12

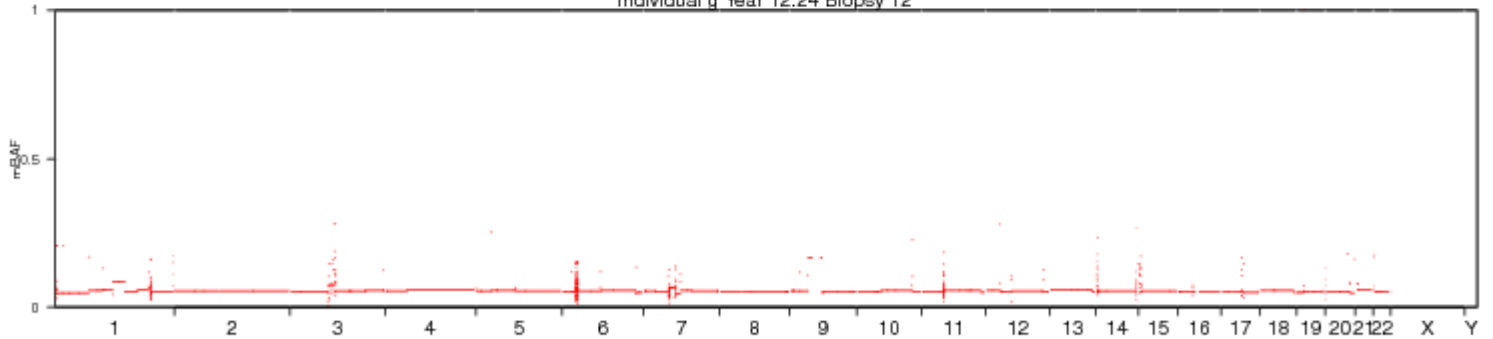

Individual g Year 12.24 Biopsy 12

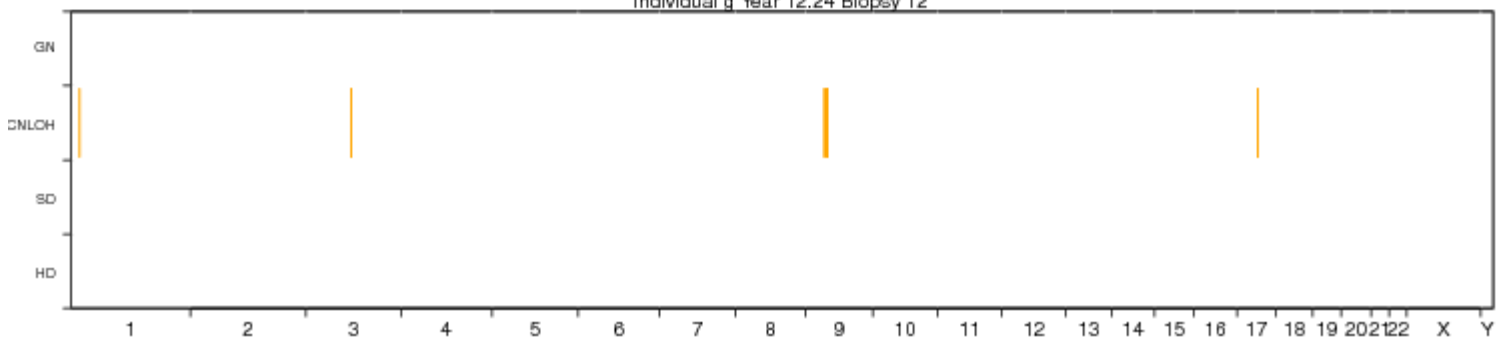

Individual h Year 0 Biopsy 1

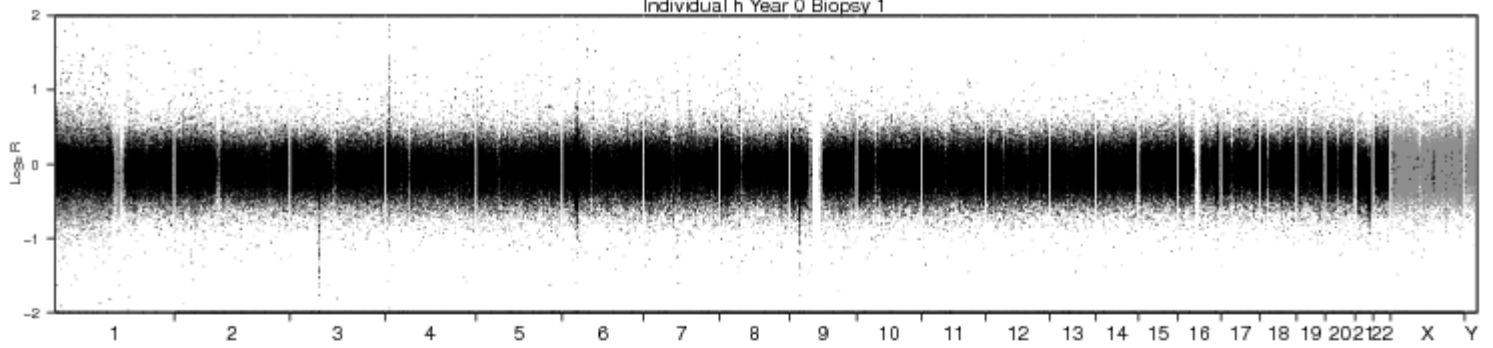

Individual h Year 0 Biopsy 1

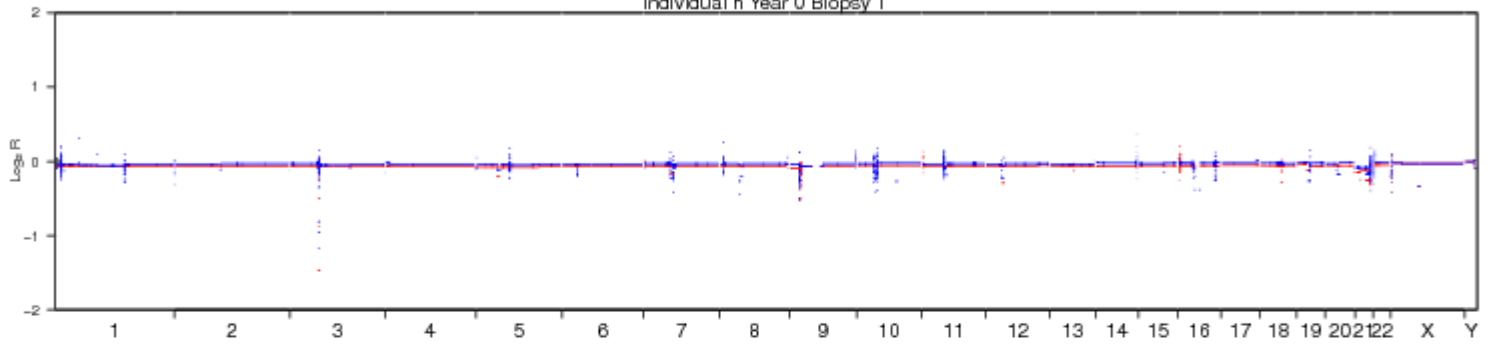

Individual h Year 0 Biopsy 1

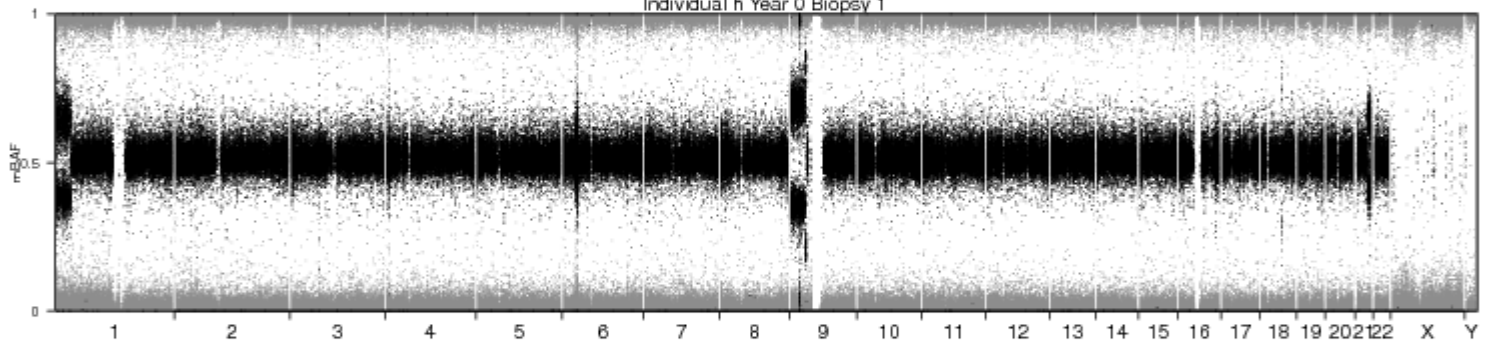

Individual h Year 0 Biopsy 1

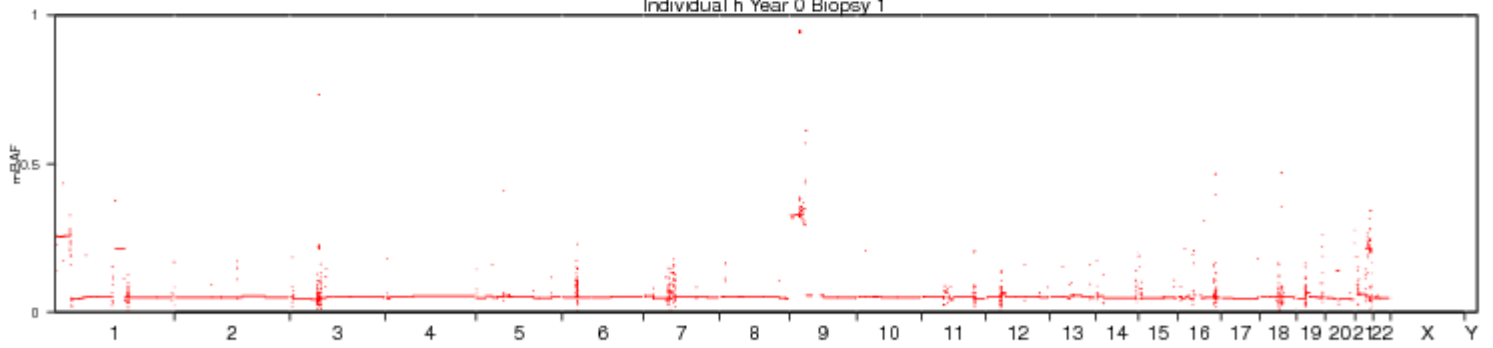

Individual h Year 0 Biopsy 1

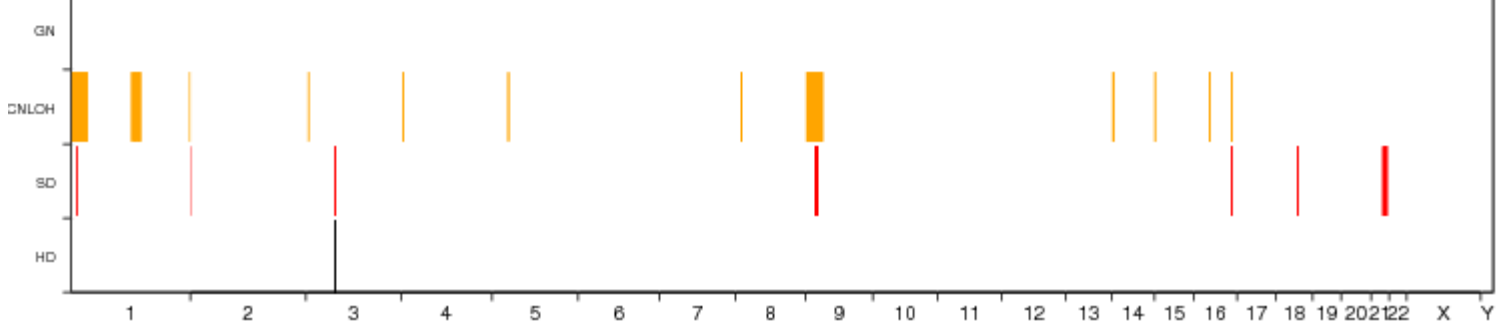

Individual h Year 0 Biopsy 2

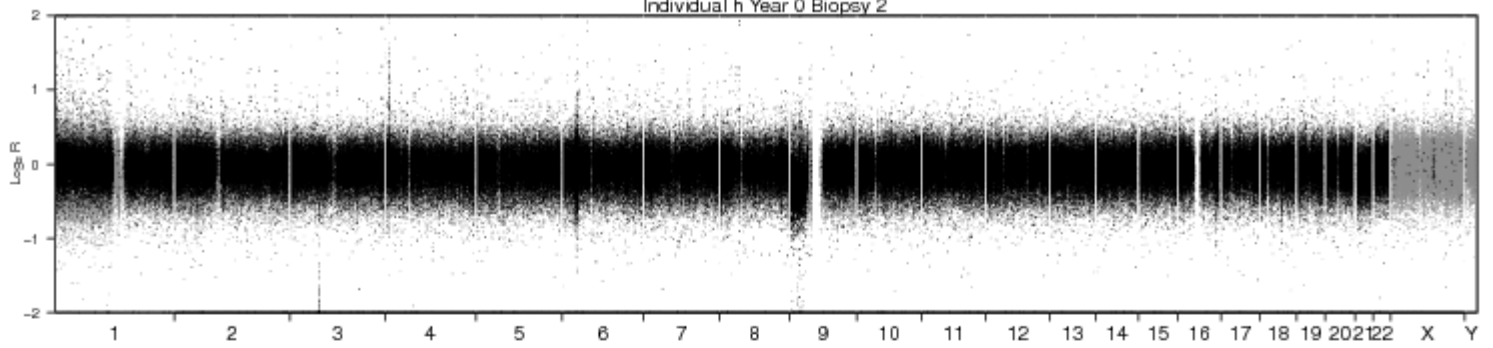

Individual h Year 0 Biopsy 2

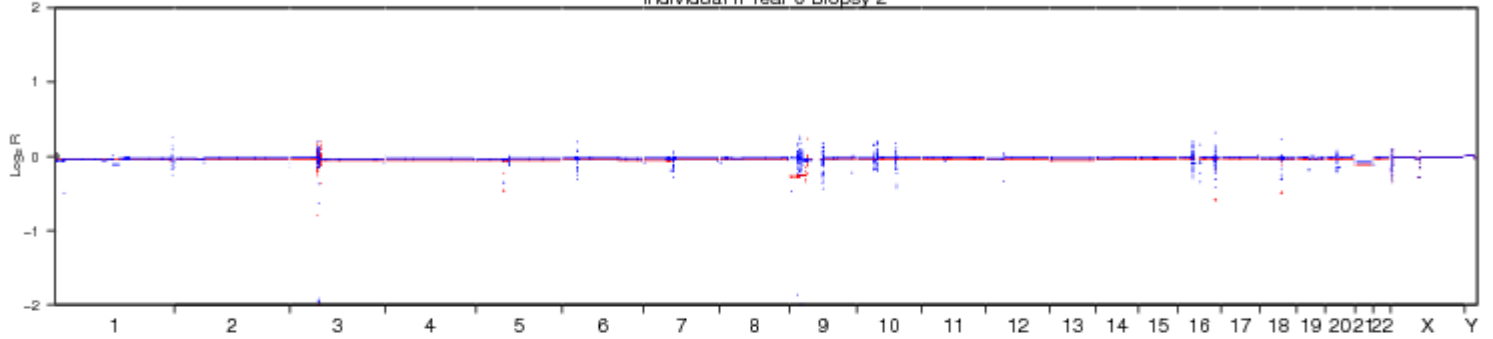

Individual h Year 0 Biopsy 2

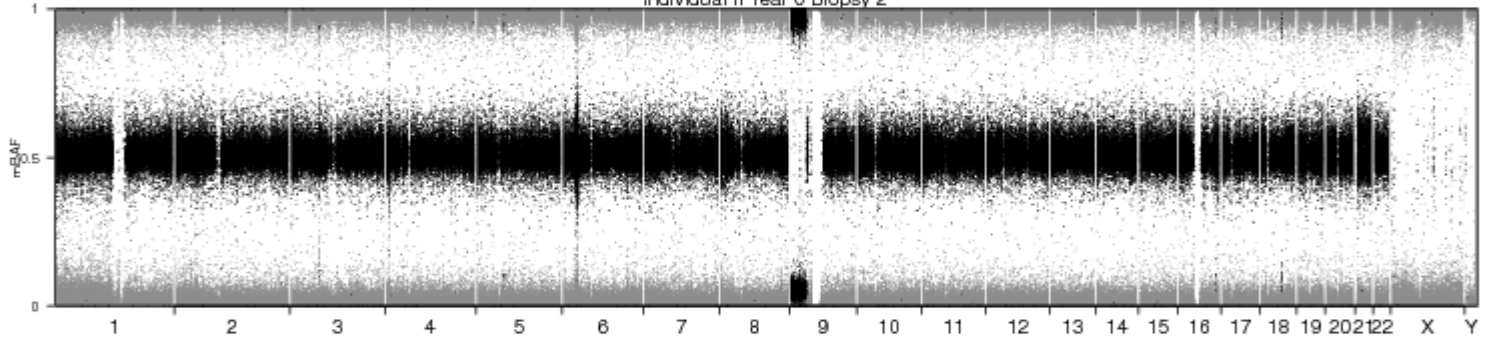

Individual h Year 0 Biopsy 2

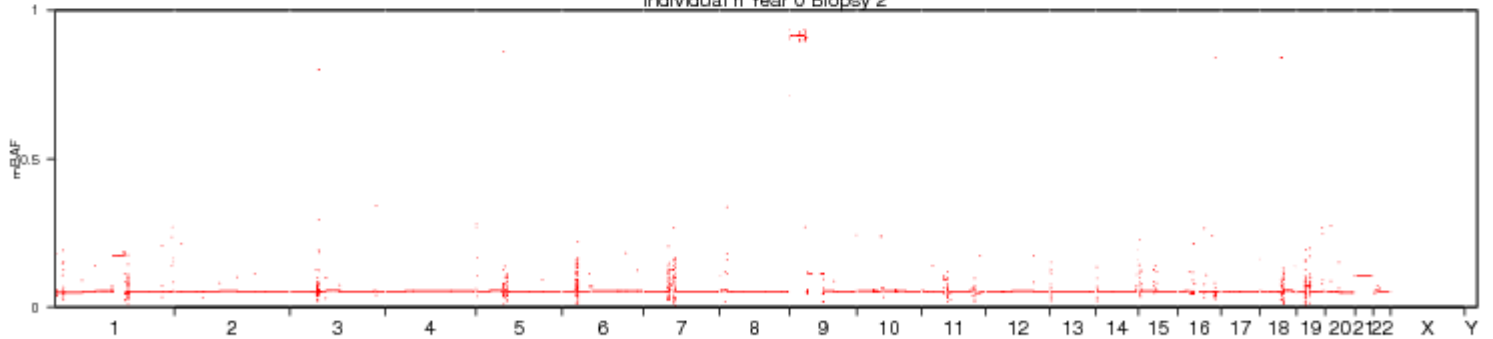

Individual h Year 0 Biopsy 2

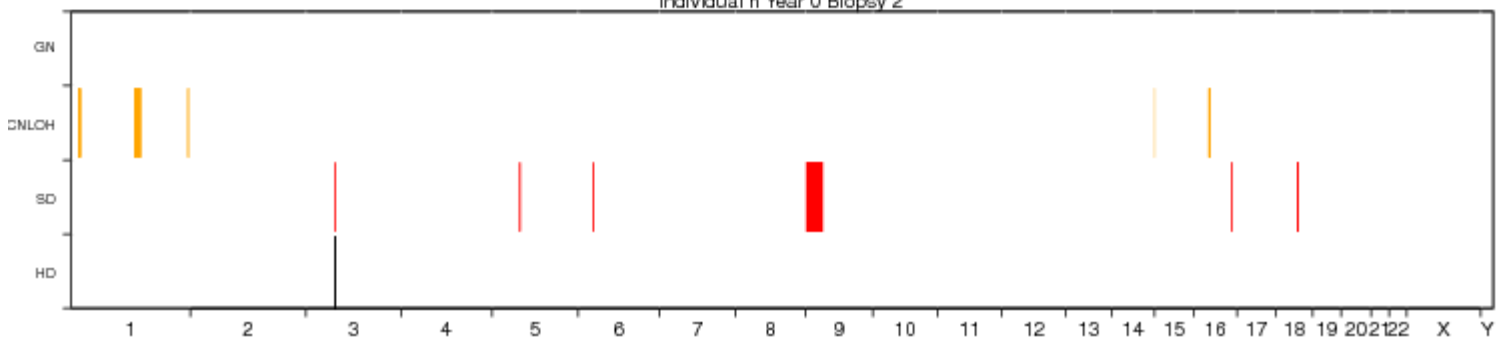

Individual h Year 1.19 Biopsy 3

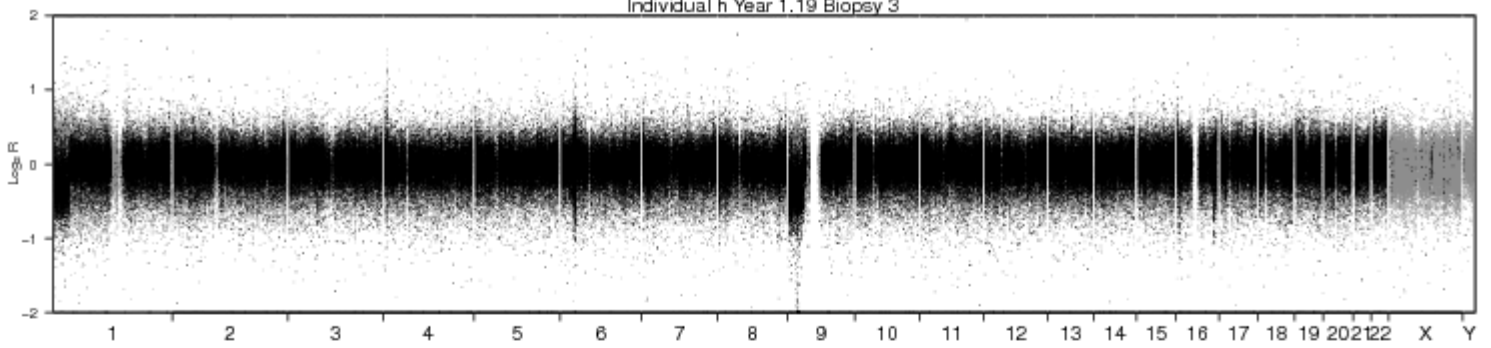

Individual h Year 1.19 Biopsy 3

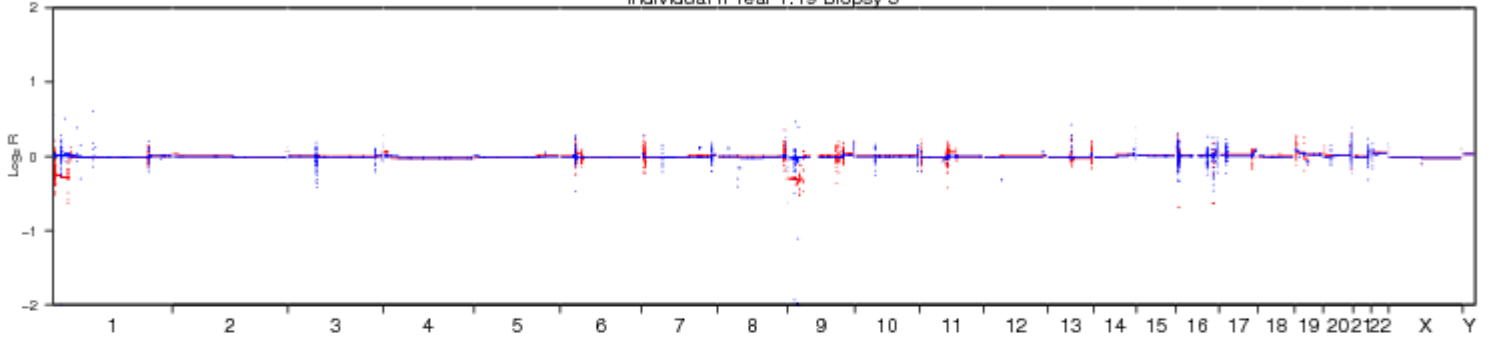

Individual h Year 1.19 Biopsy 3

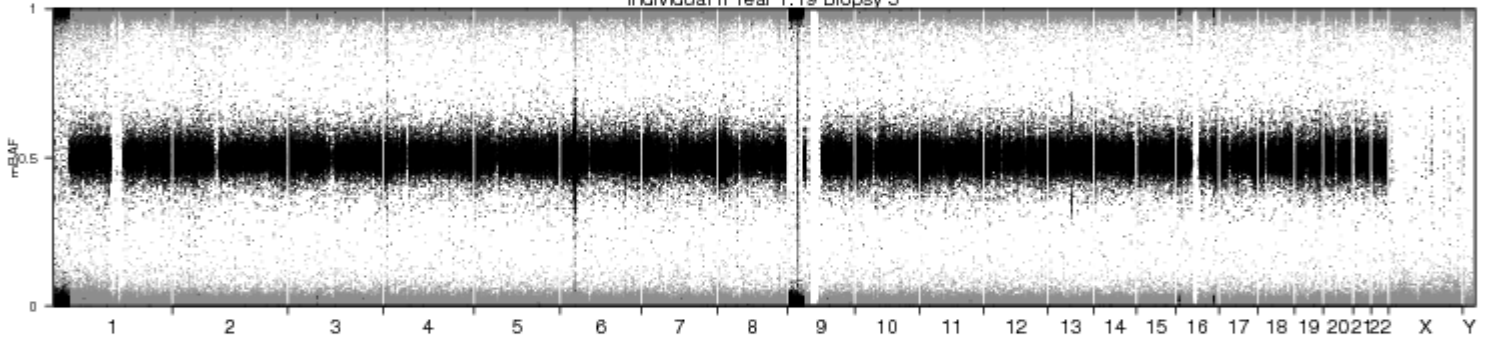

Individual h Year 1.19 Biopsy 3

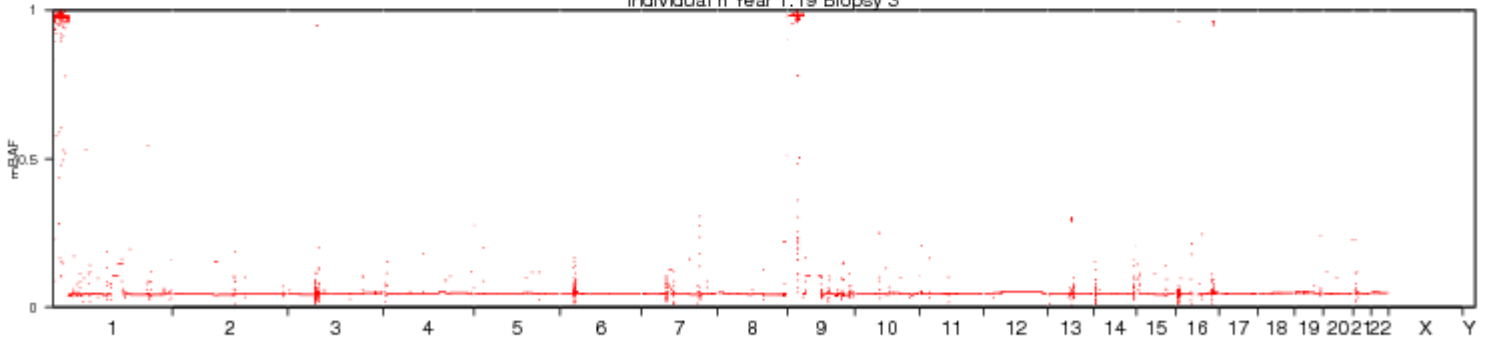

Individual h Year 1.19 Biopsy 3

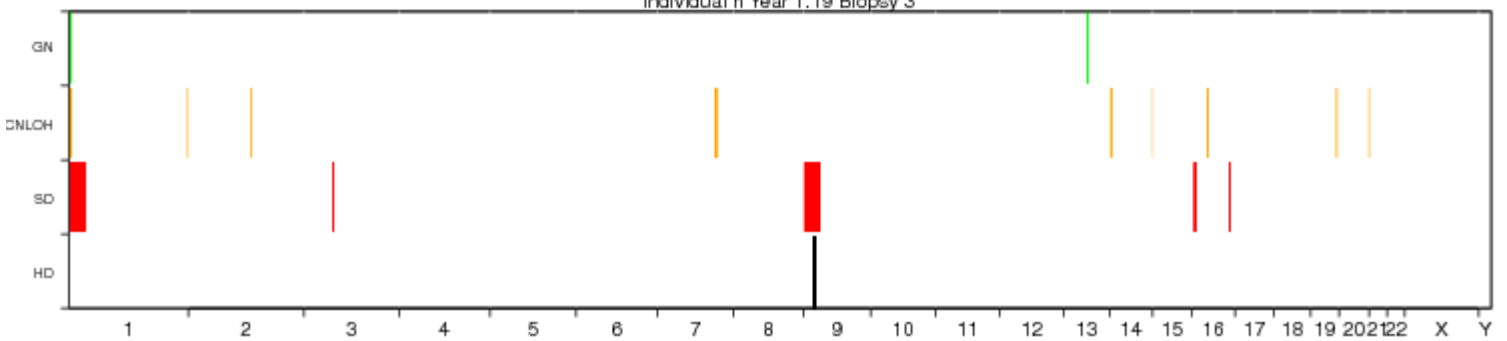



Individual h Year 1.19 Biopsy 4

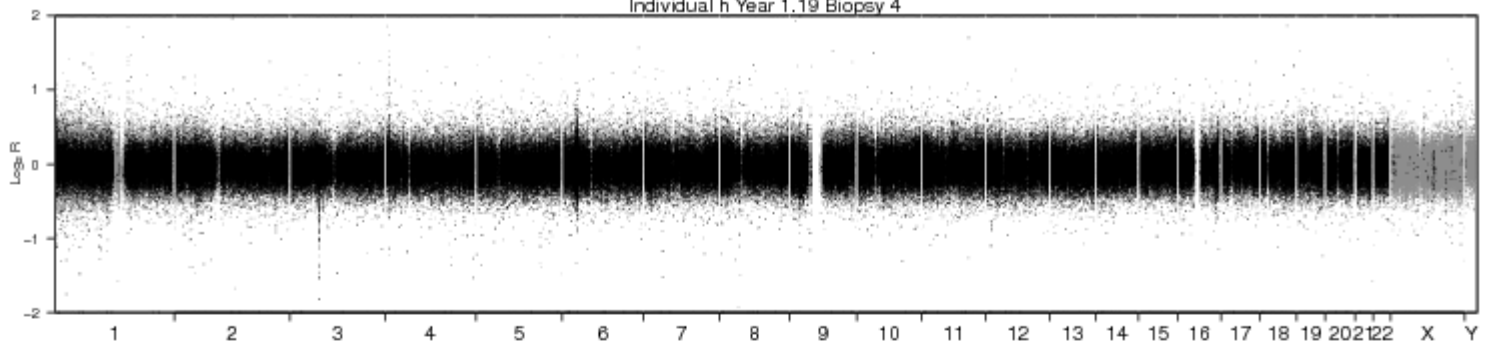

Individual h Year 1.19 Biopsy 4

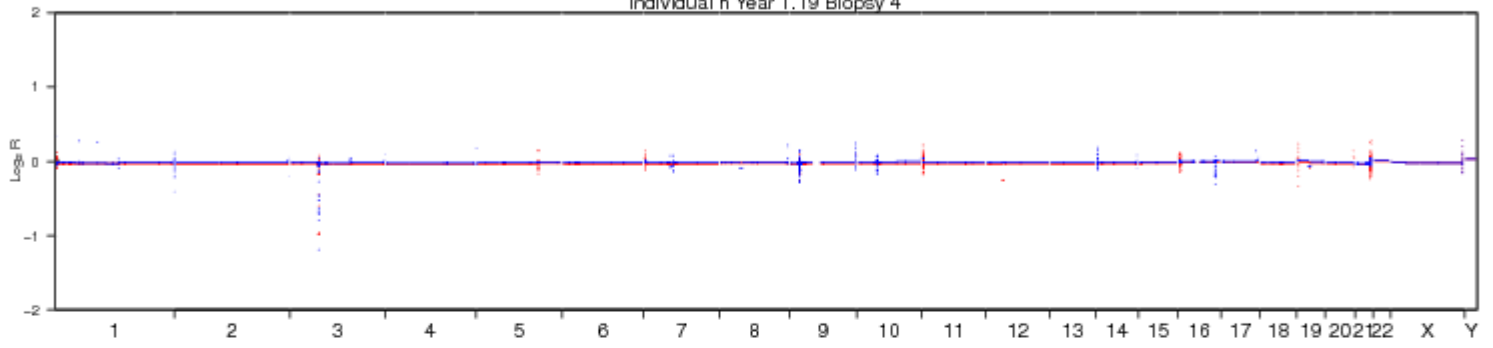

Individual h Year 1.19 Biopsy 4

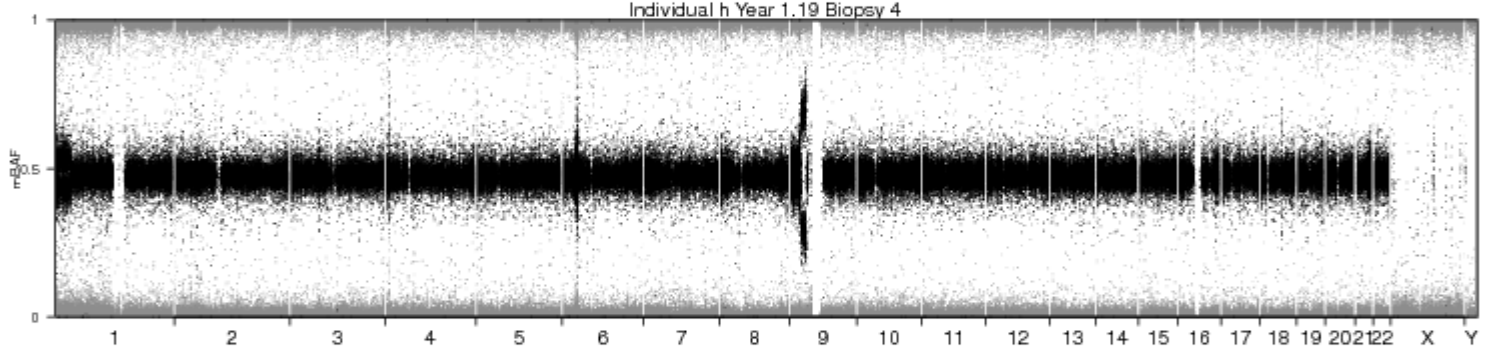

Individual h Year 1.19 Biopsy 4

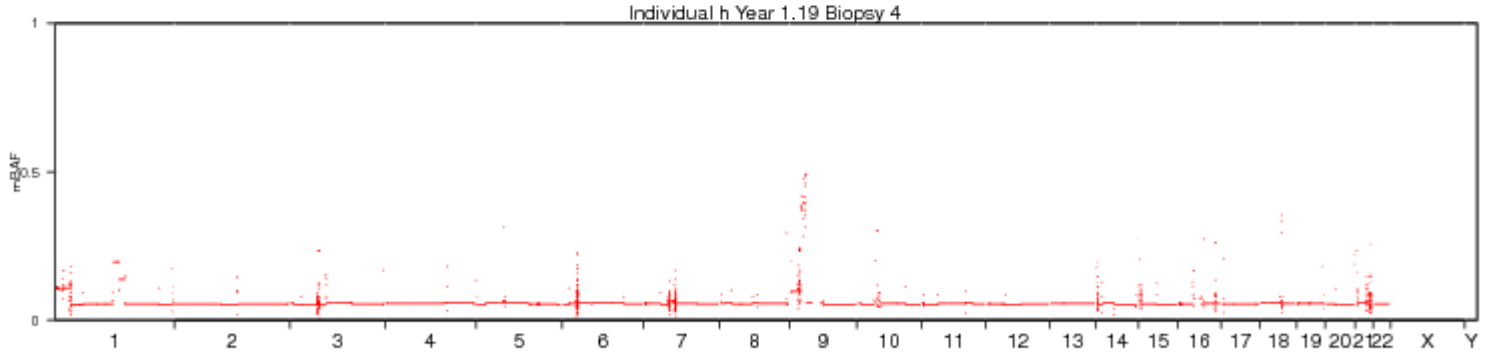

Individual h Year 1.19 Biopsy 4

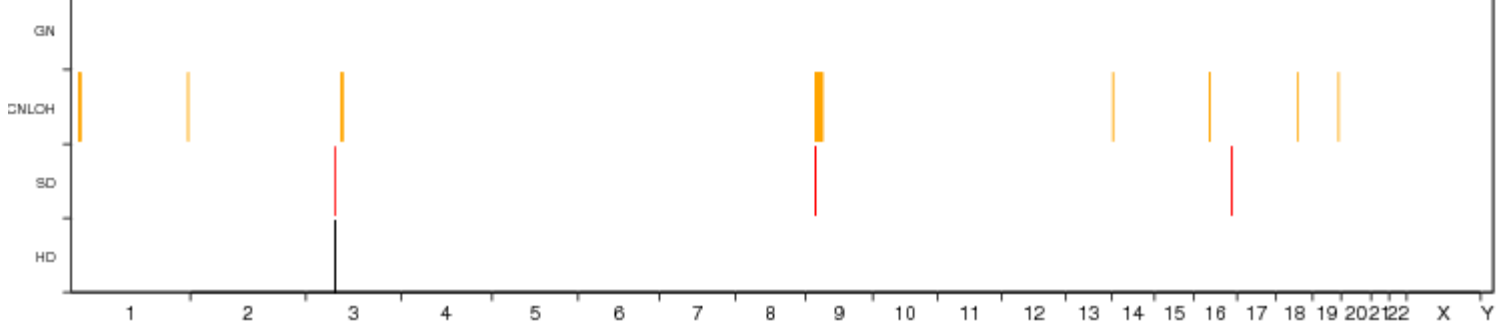

Individual h Year 2.53 Biopsy 5

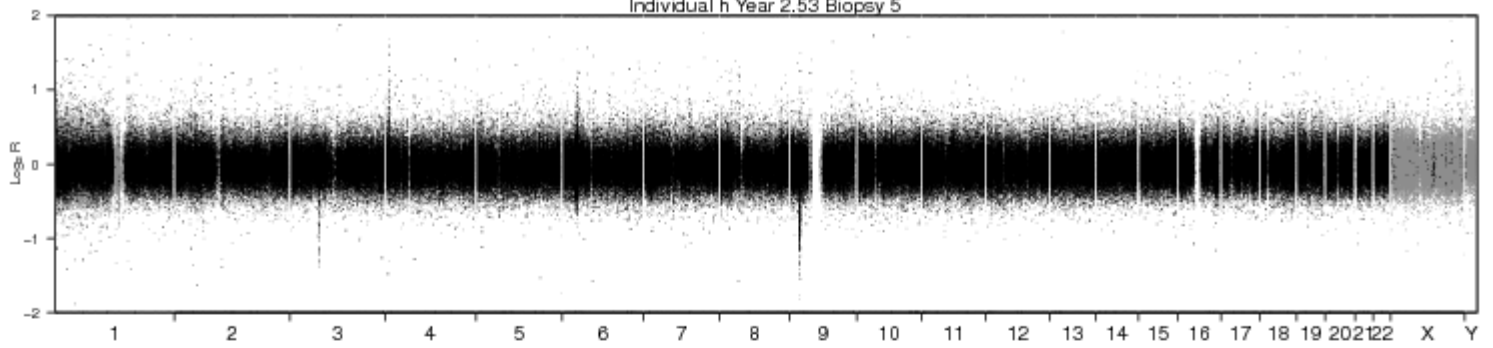

Individual h Year 2.53 Biopsy 5

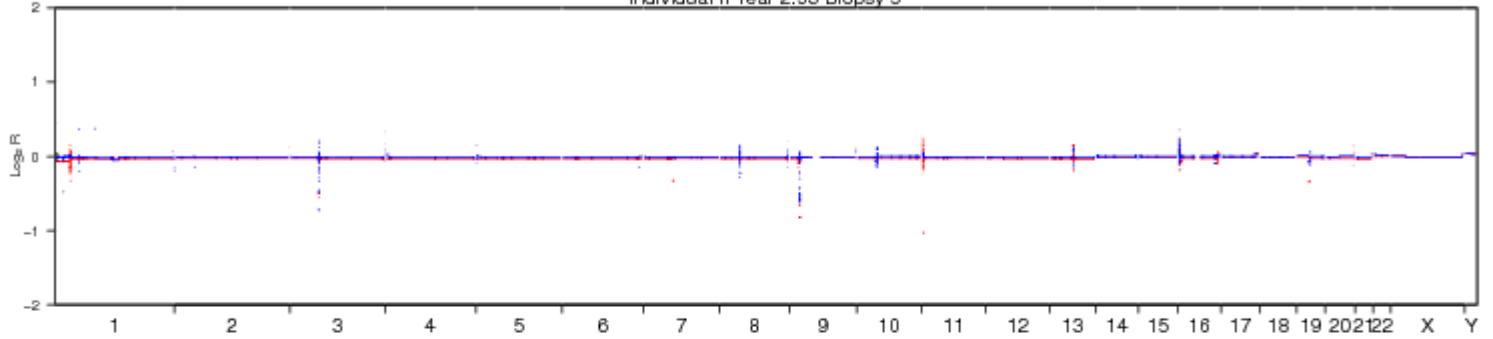

Individual h Year 2.53 Biopsy 5

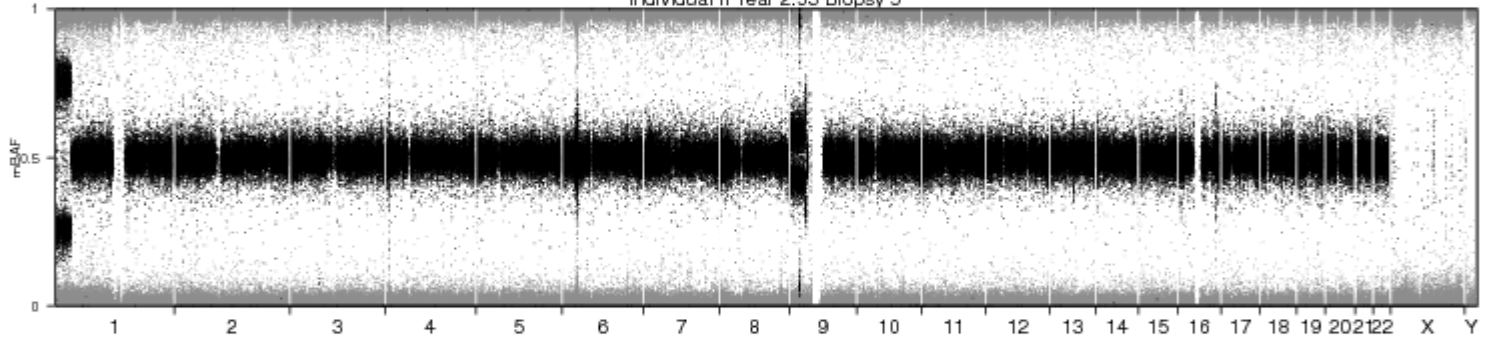

Individual h Year 2.53 Biopsy 5

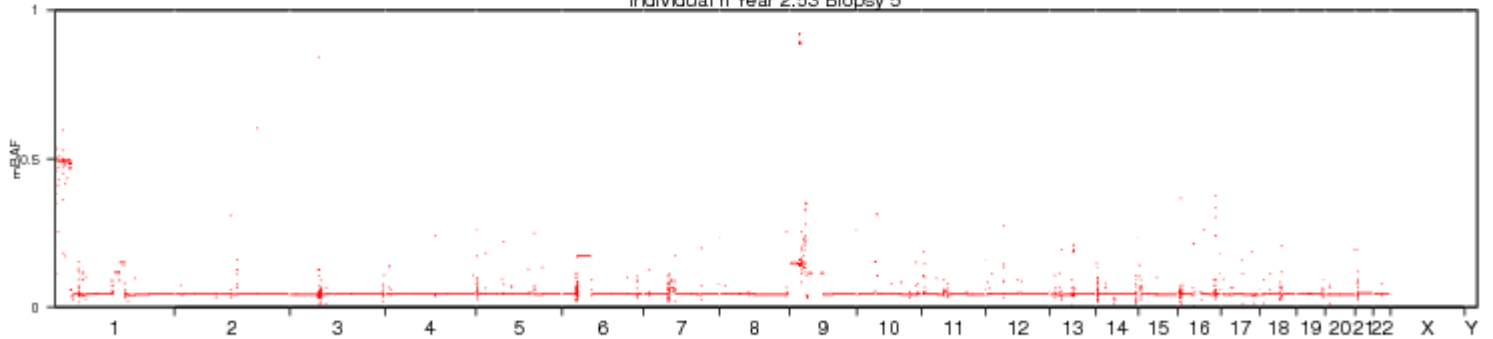

Individual h Year 2.53 Biopsy 5

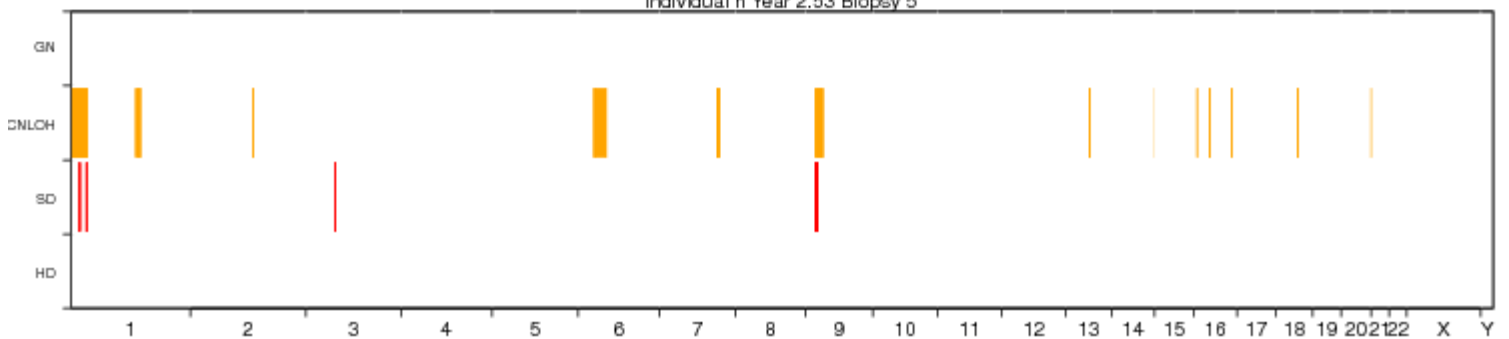

Individual h Year 2.53 Biopsy 6

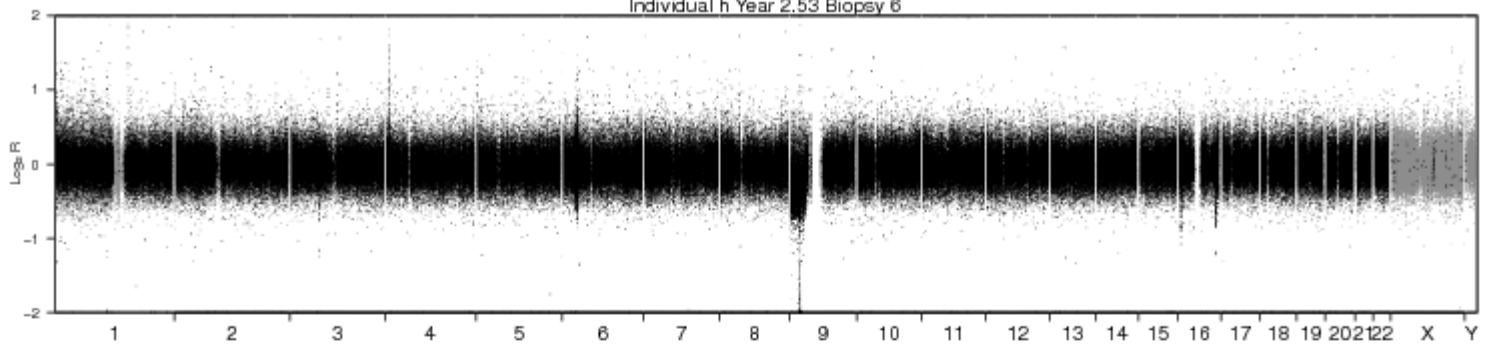

Individual h Year 2.53 Biopsy 6

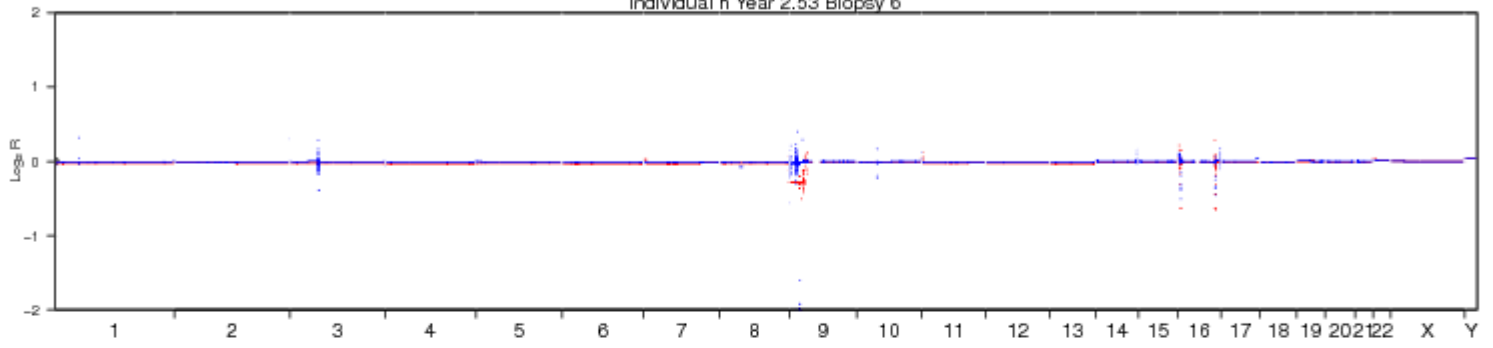

Individual h Year 2.53 Biopsy 6

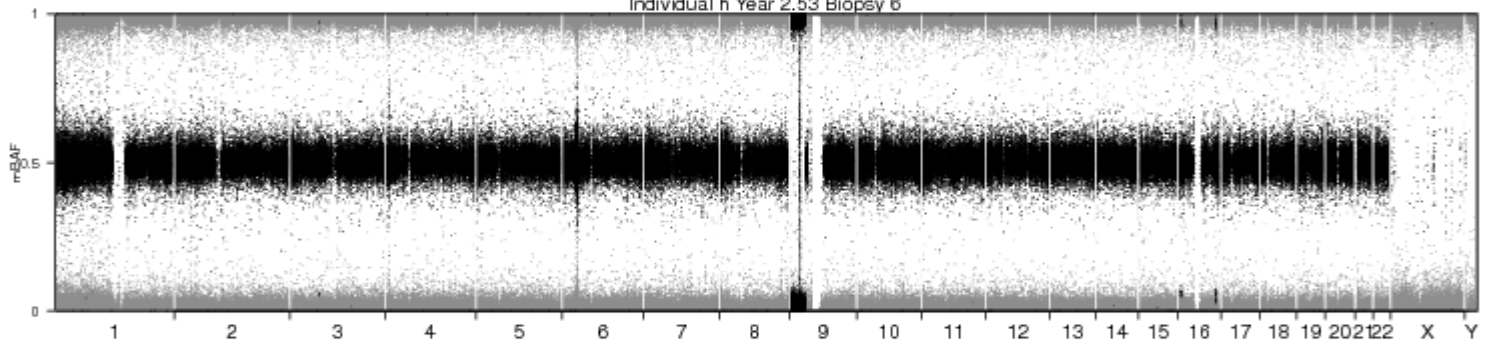

Individual h Year 2.53 Biopsy 6

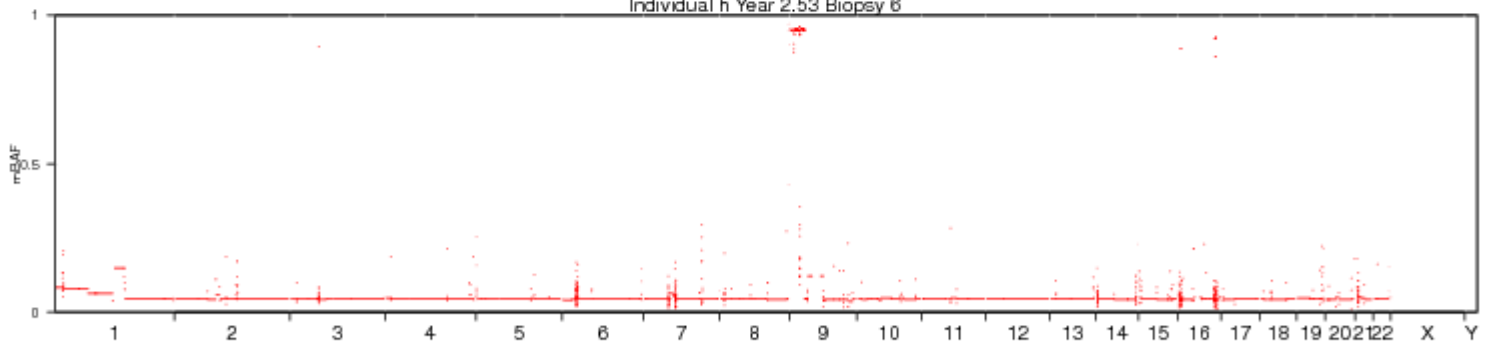

Individual h Year 2.53 Biopsy 6

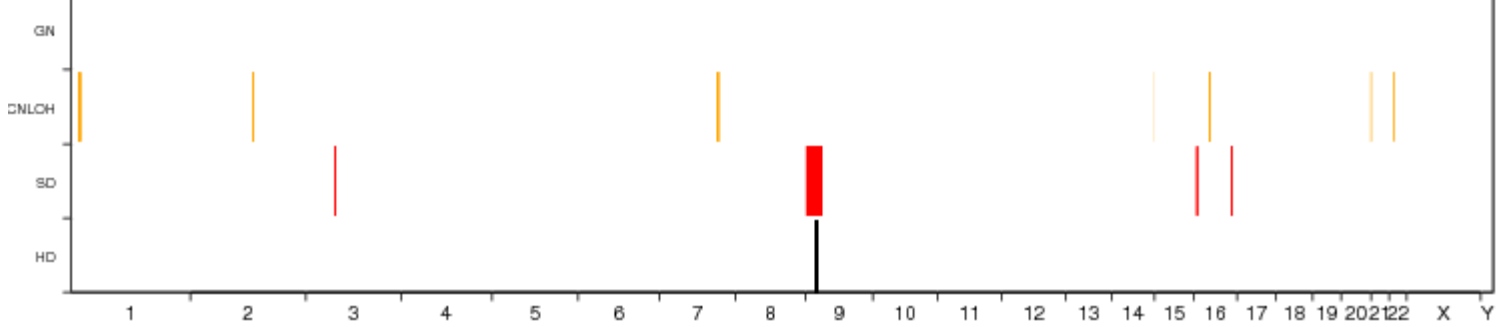

Individual h Year 9.53 Biopsy 7

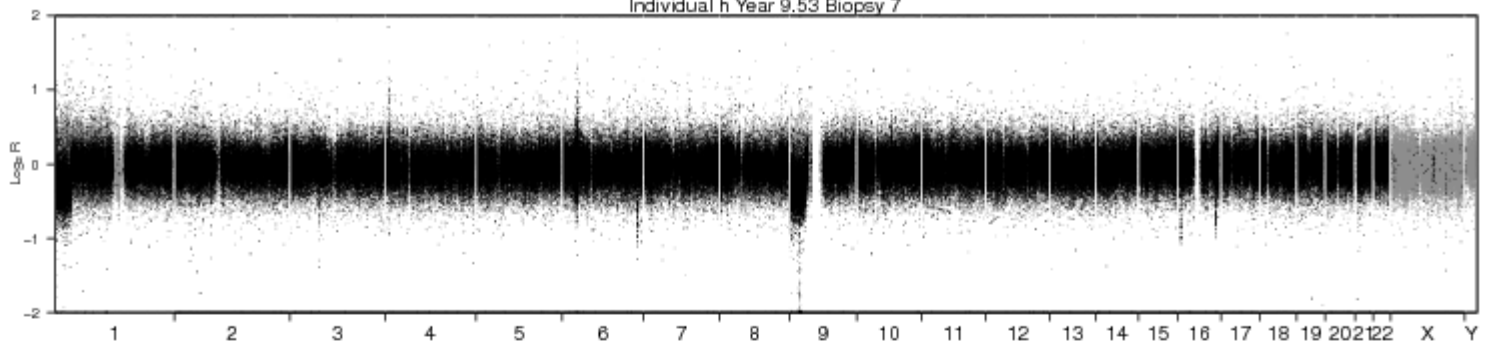

Individual h Year 9.53 Biopsy 7

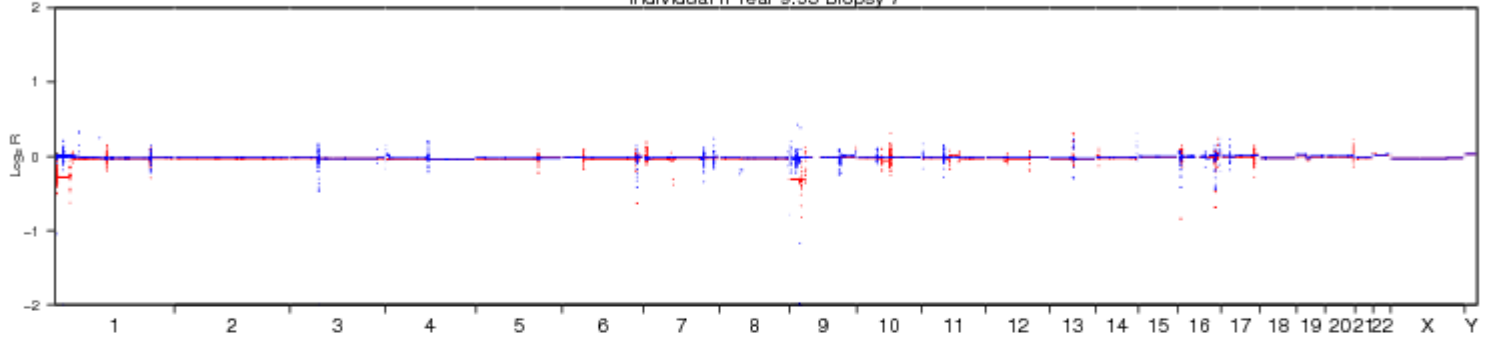

Individual h Year 9.53 Biopsy 7

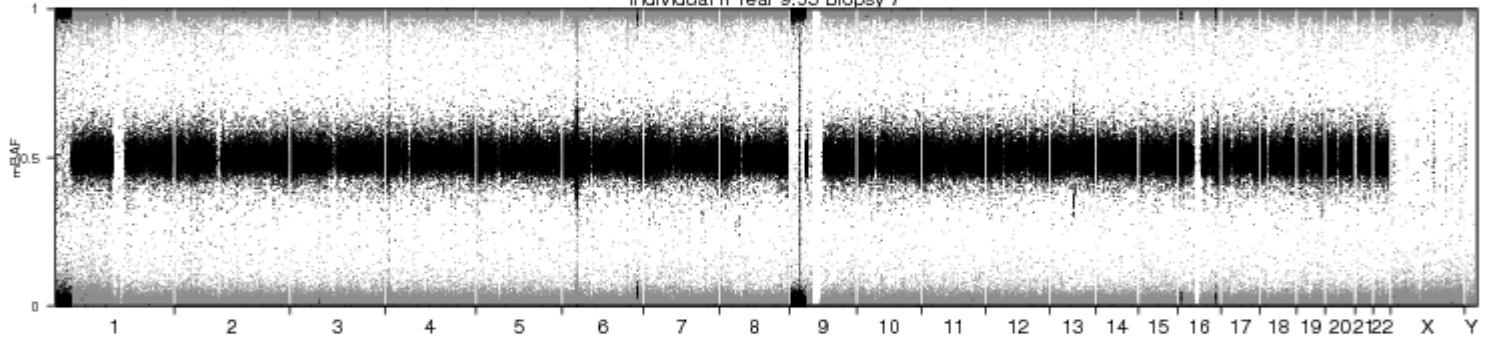

Individual h Year 9.53 Biopsy 7

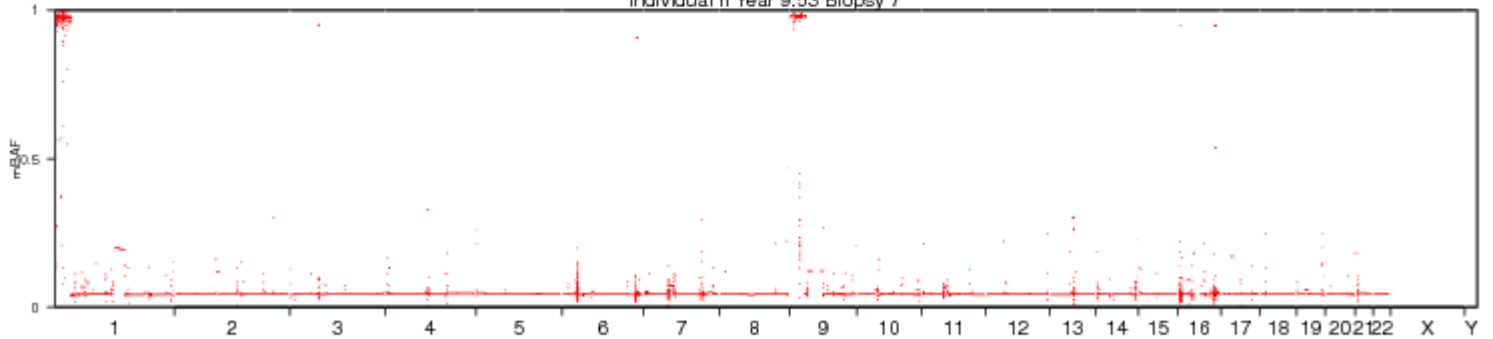

Individual h Year 9.53 Biopsy 7

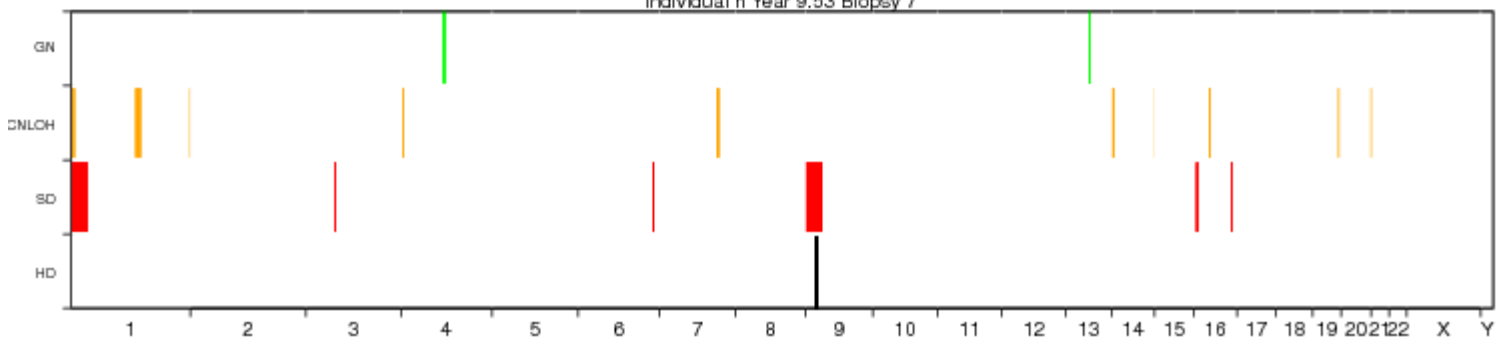



Individual h Year 9.53 Biopsy 8

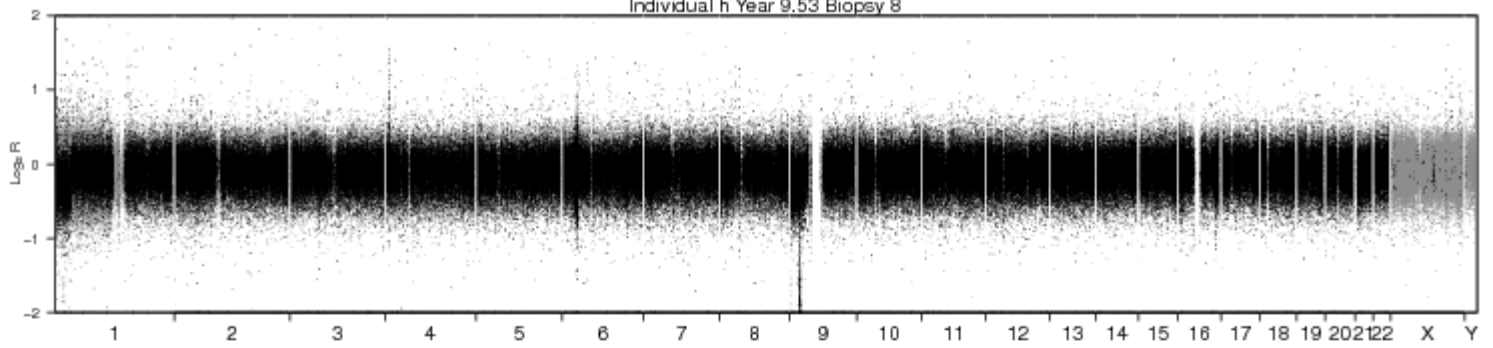

Individual h Year 9.53 Biopsy 8

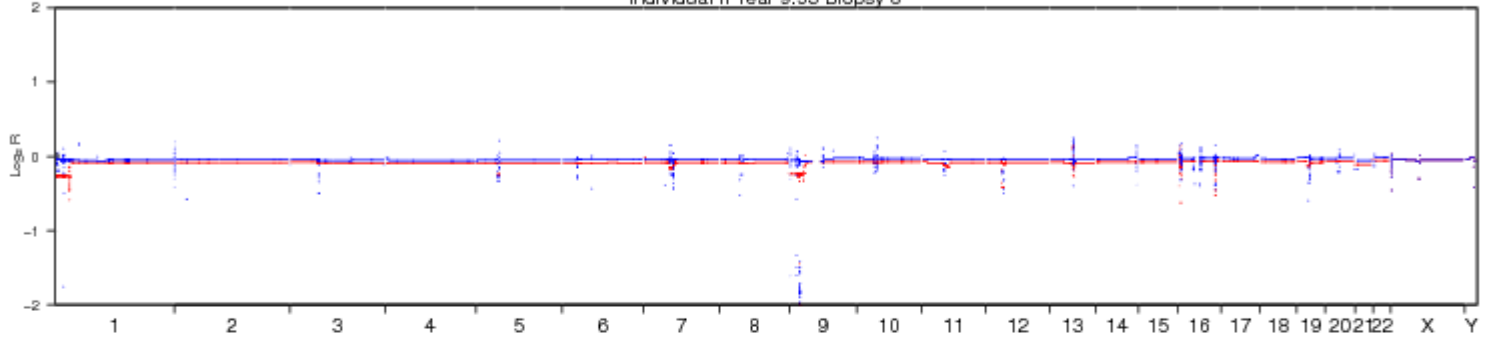

Individual h Year 9.53 Biopsy 8

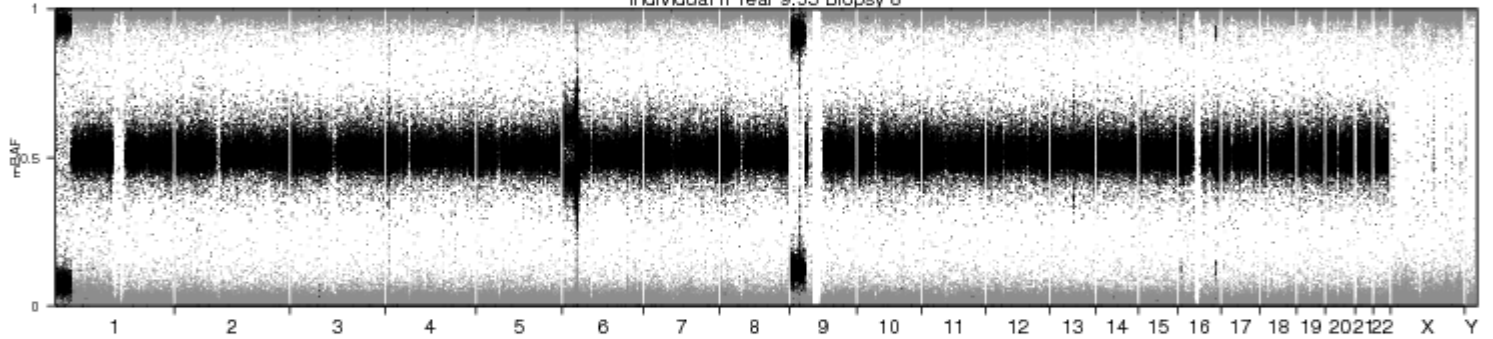

Individual h Year 9.53 Biopsy 8

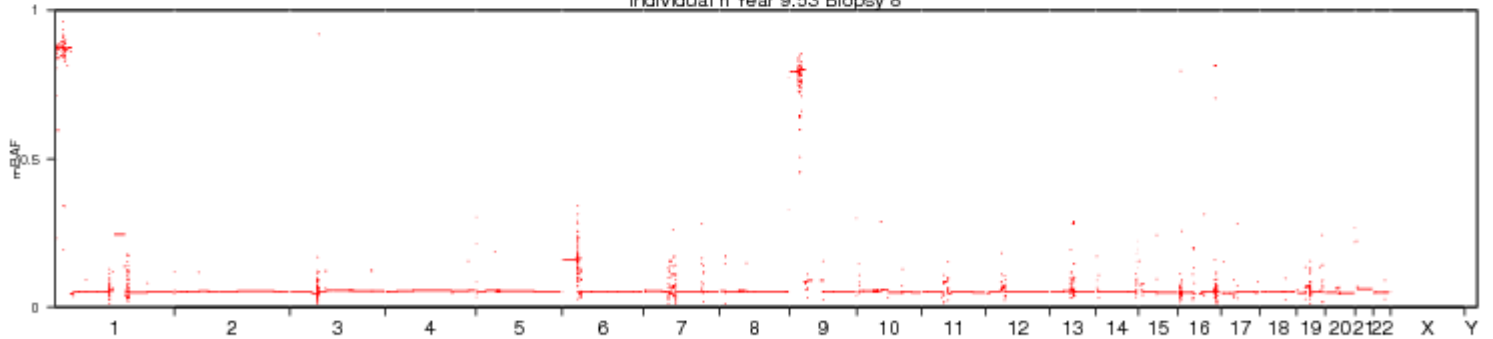

Individual h Year 9.53 Biopsy 8

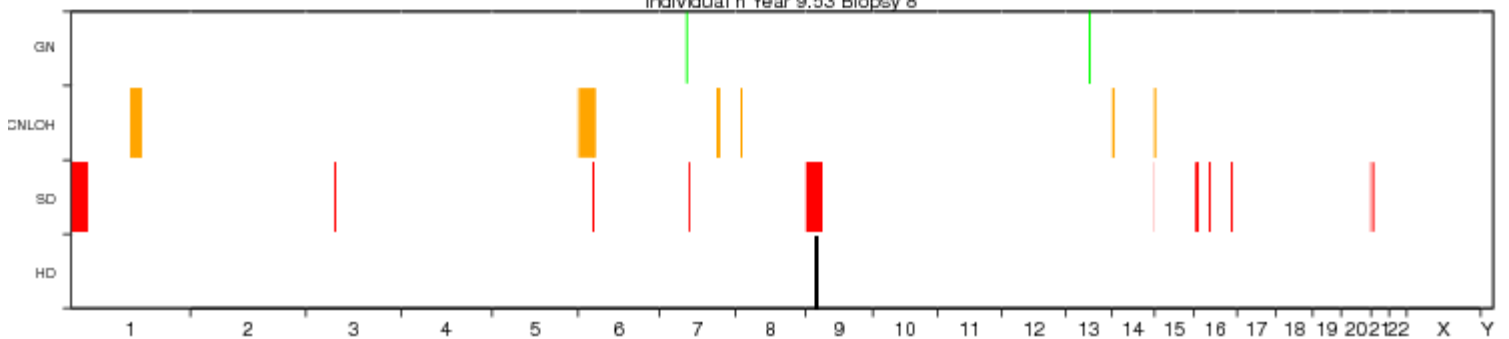

Individual h Year 9.53 Biopsy 9

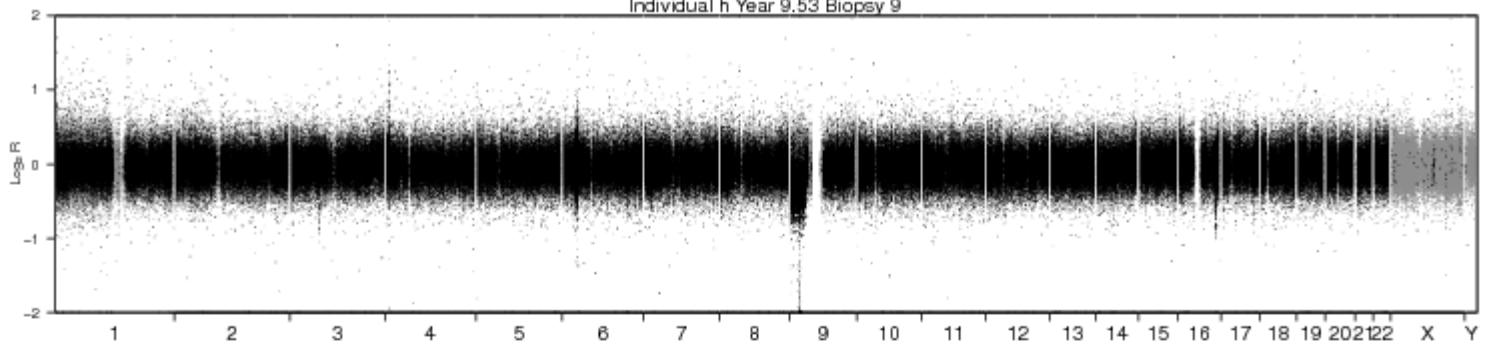

Individual h Year 9.53 Biopsy 9

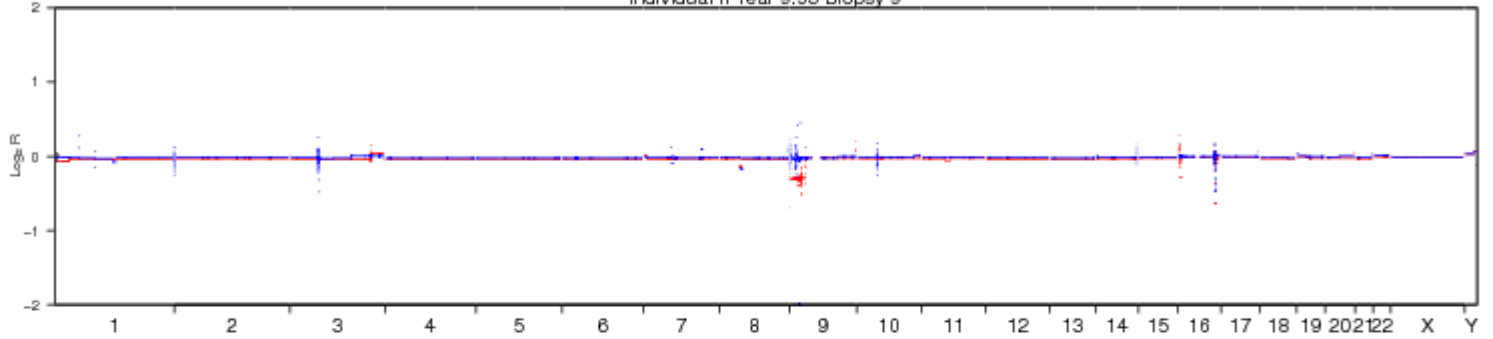

Individual h Year 9.53 Biopsy 9

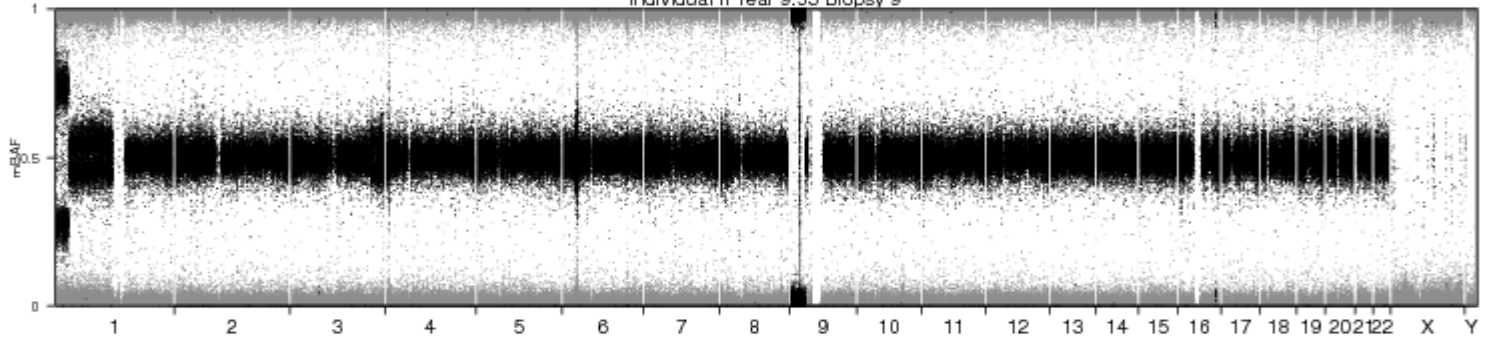

Individual h Year 9.53 Biopsy 9

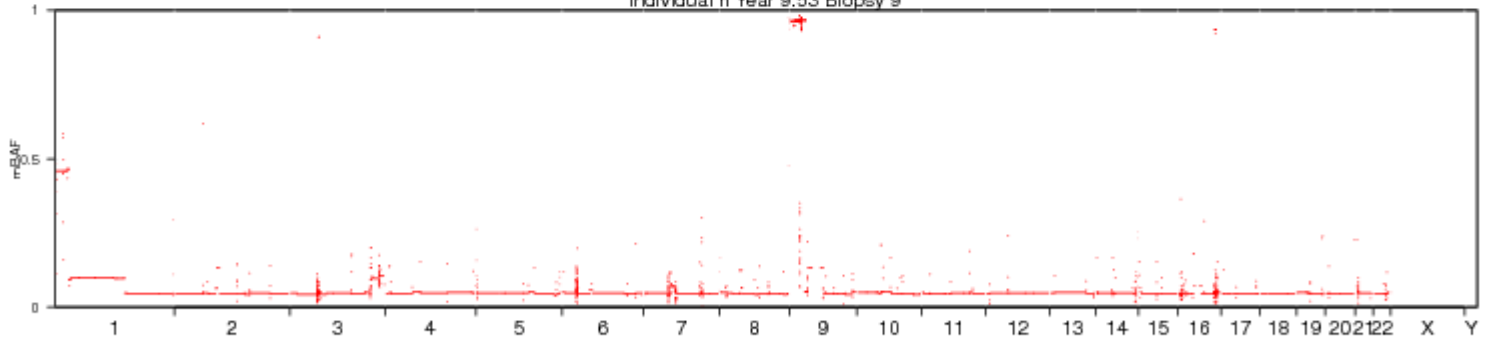

Individual h Year 9.53 Biopsy 9

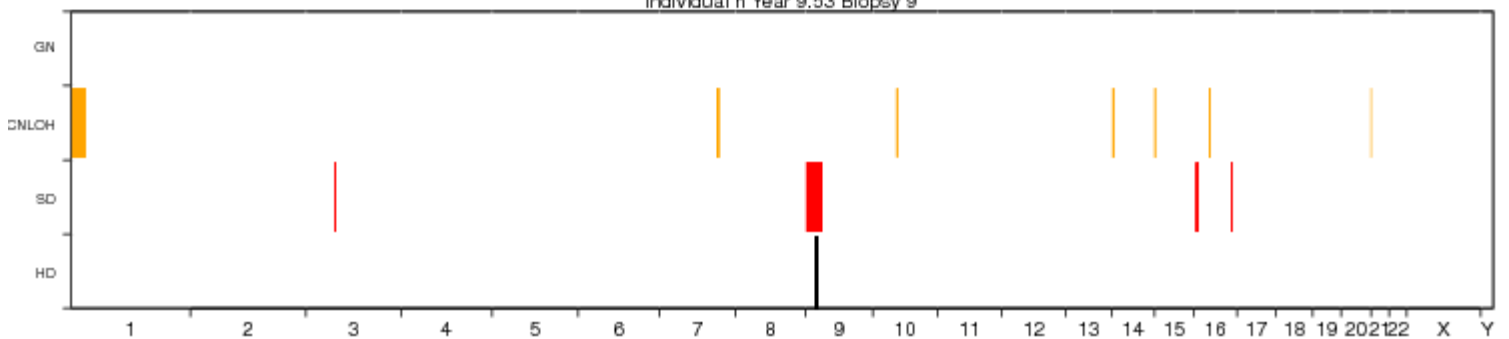

Individual h Year 11.48 Biopsy 10

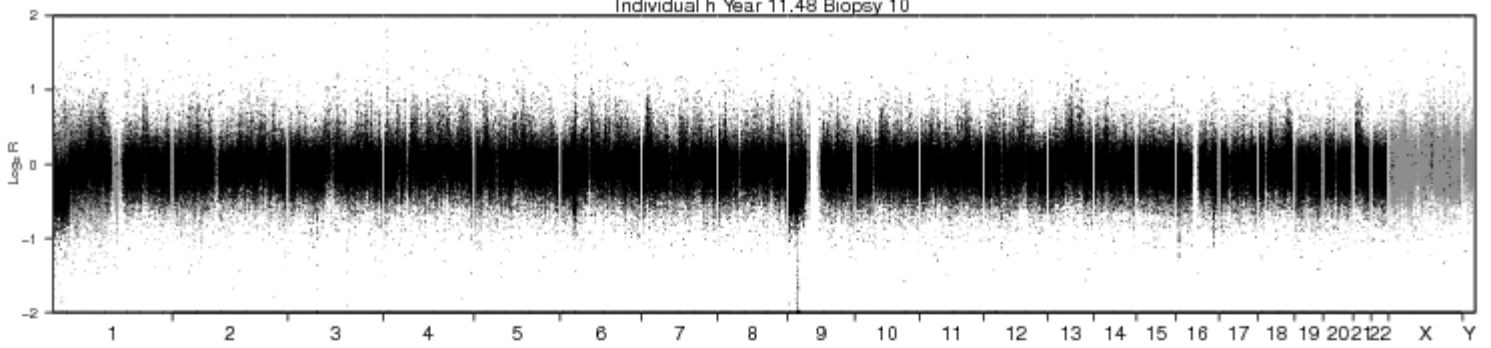

Individual h Year 11.48 Biopsy 10

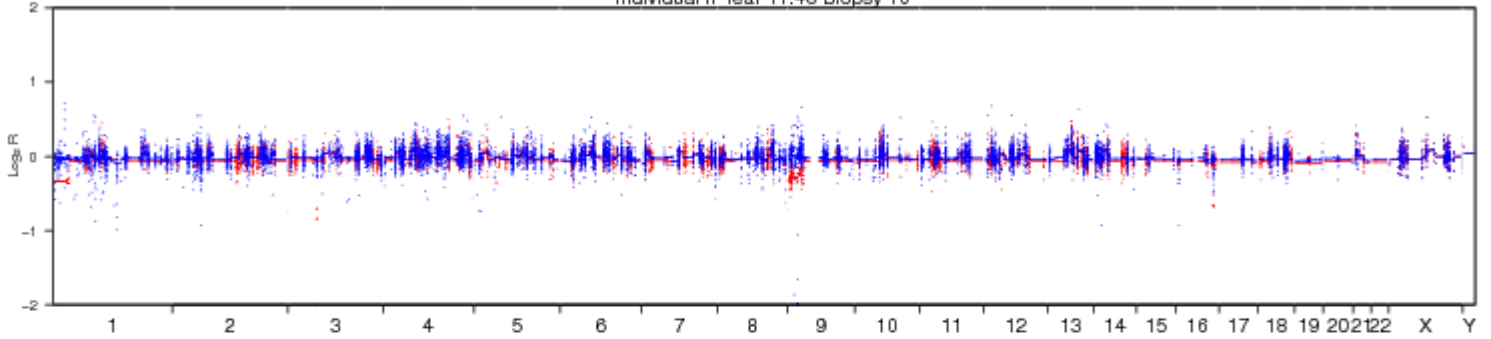

Individual h Year 11.48 Biopsy 10

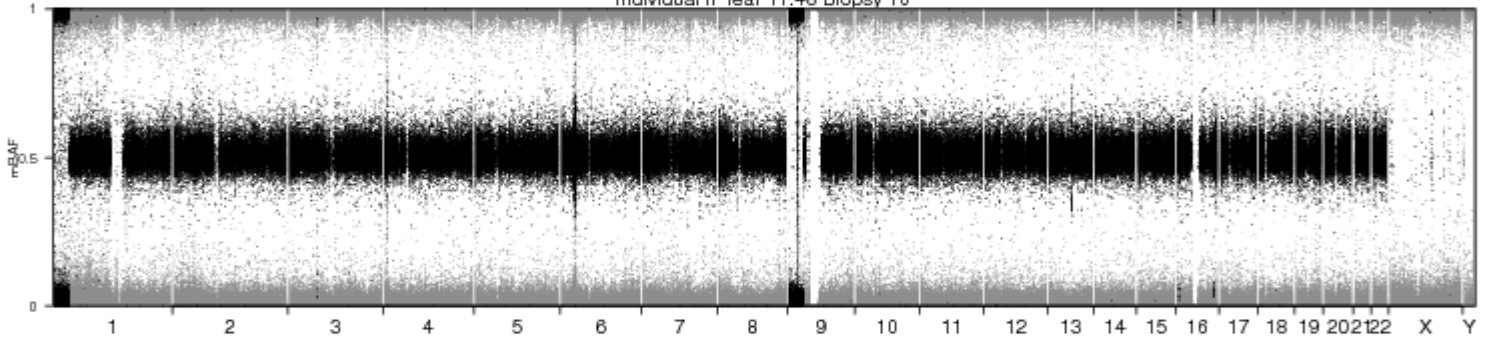

Individual h Year 11.48 Biopsy 10

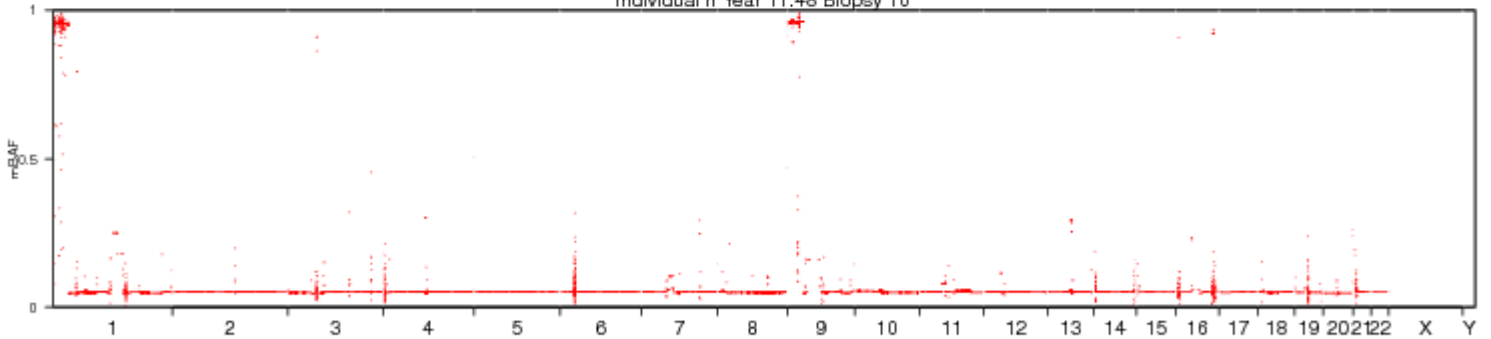

Individual h Year 11.48 Biopsy 10

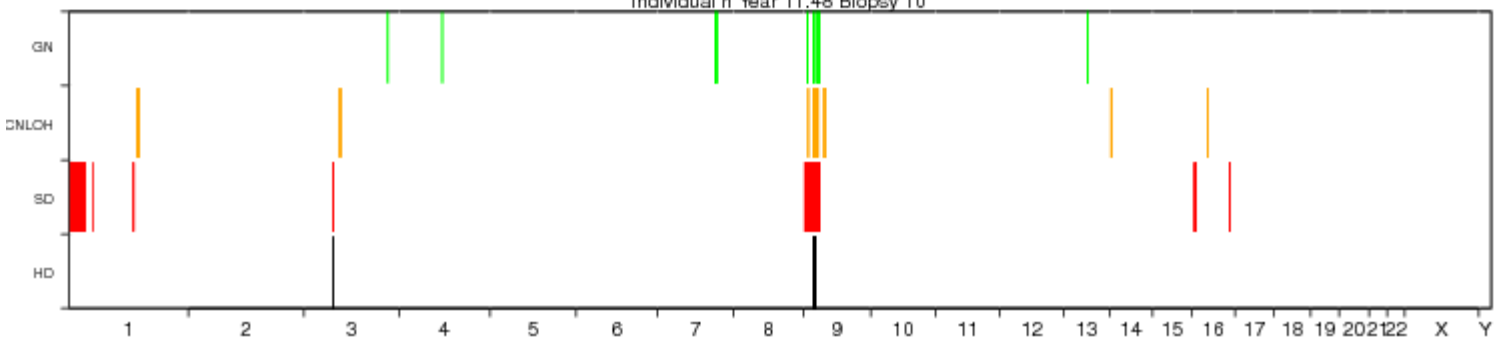

Individual h Year 11.48 Biopsy 11

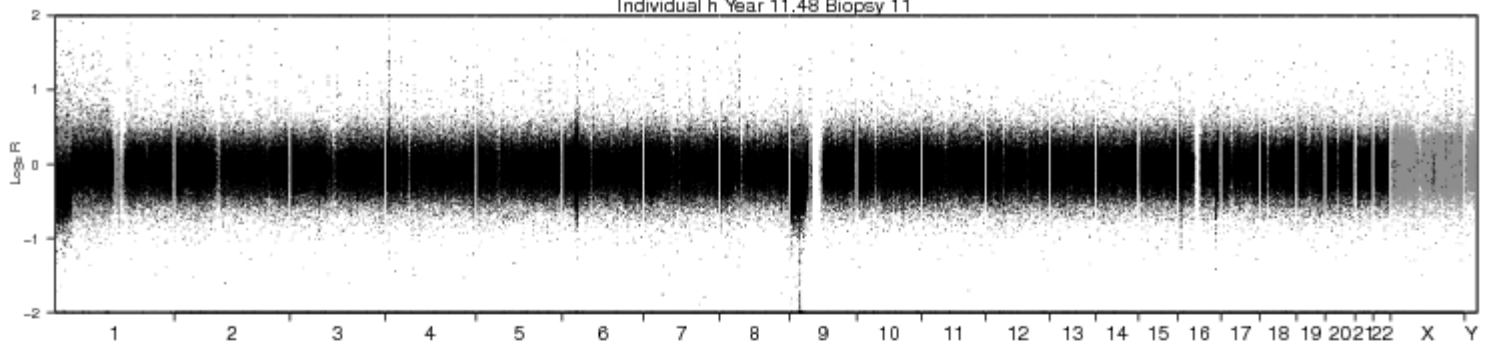

Individual h Year 11.48 Biopsy 11

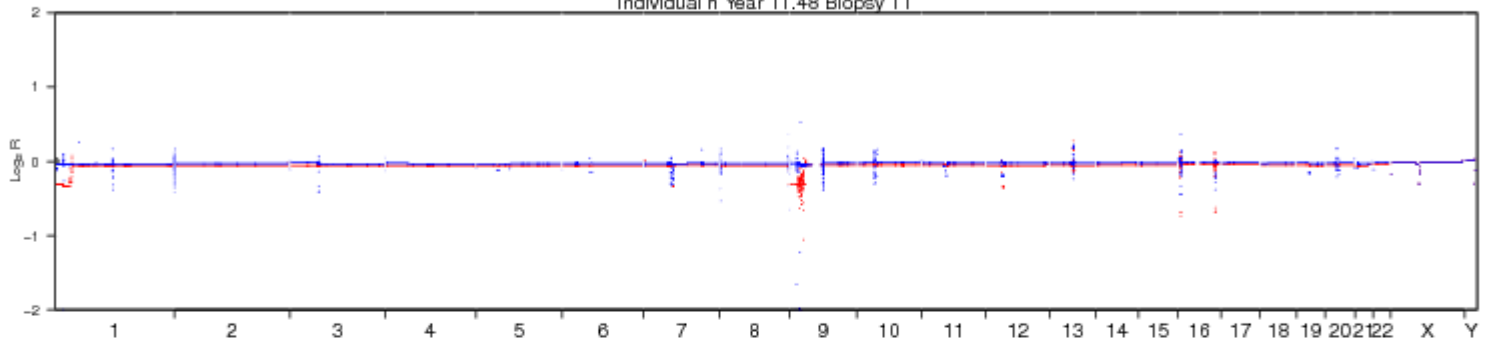

Individual h Year 11.48 Biopsy 11

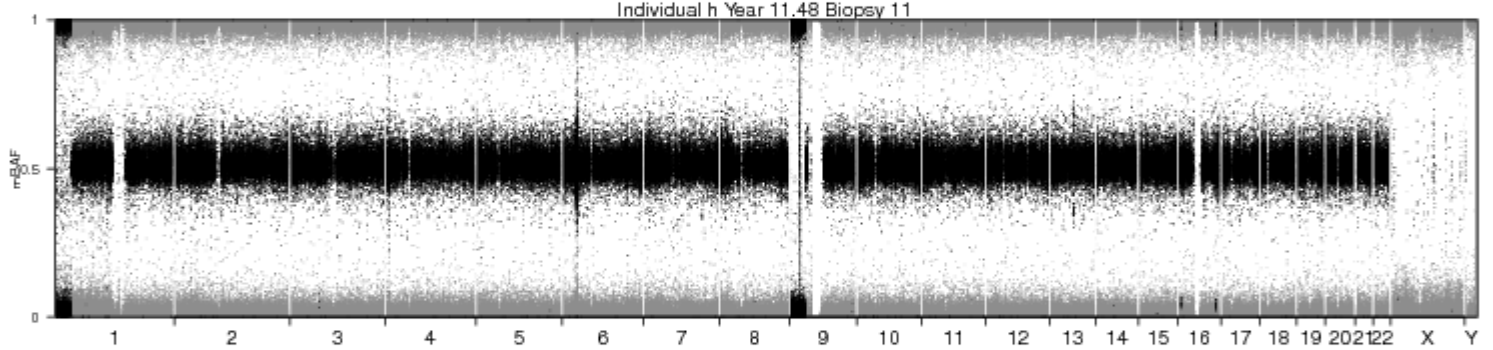

Individual h Year 11.48 Biopsy 11

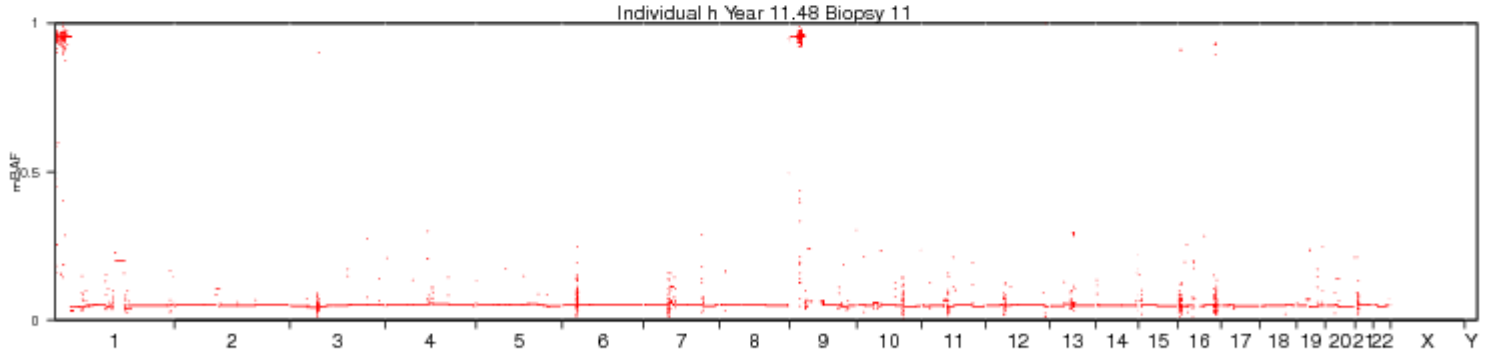

Individual h Year 11.48 Biopsy 11

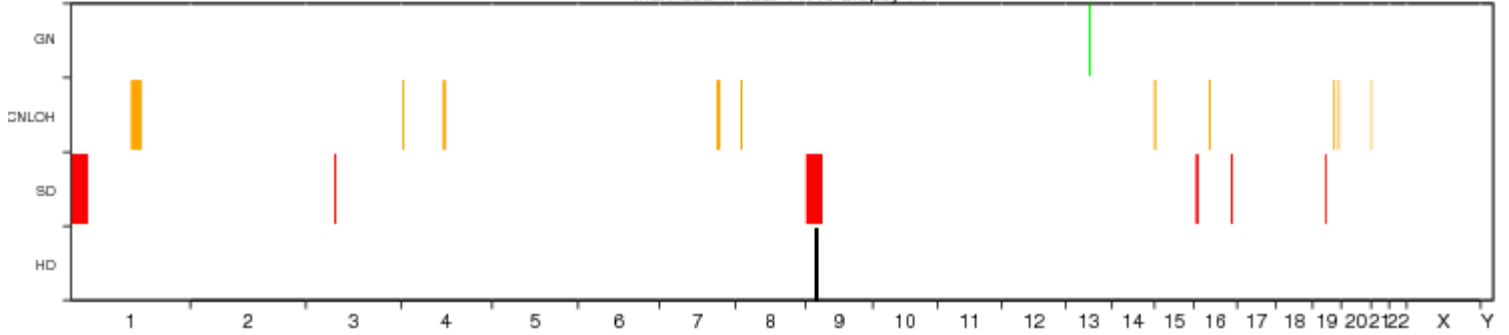



Individual h Year 11.48 Biopsy 12

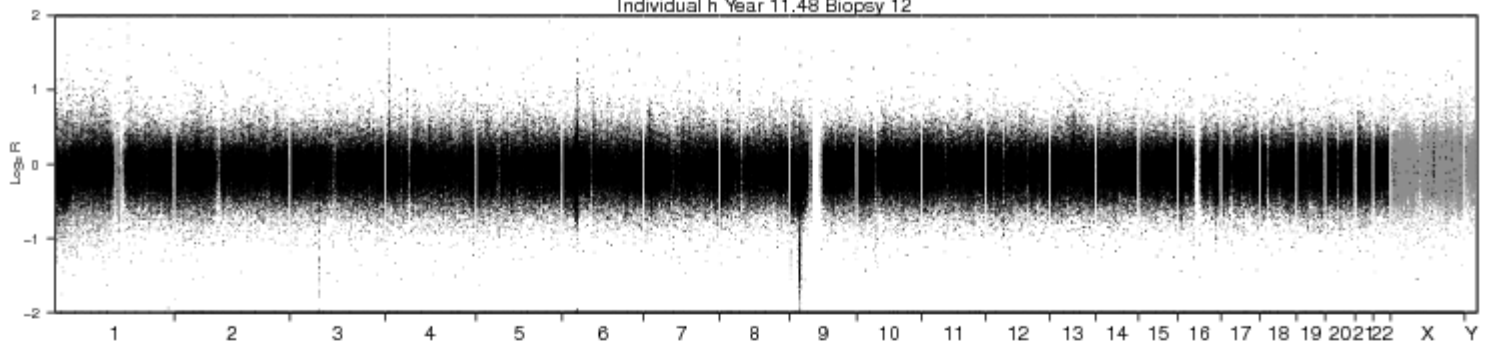

Individual h Year 11.48 Biopsy 12

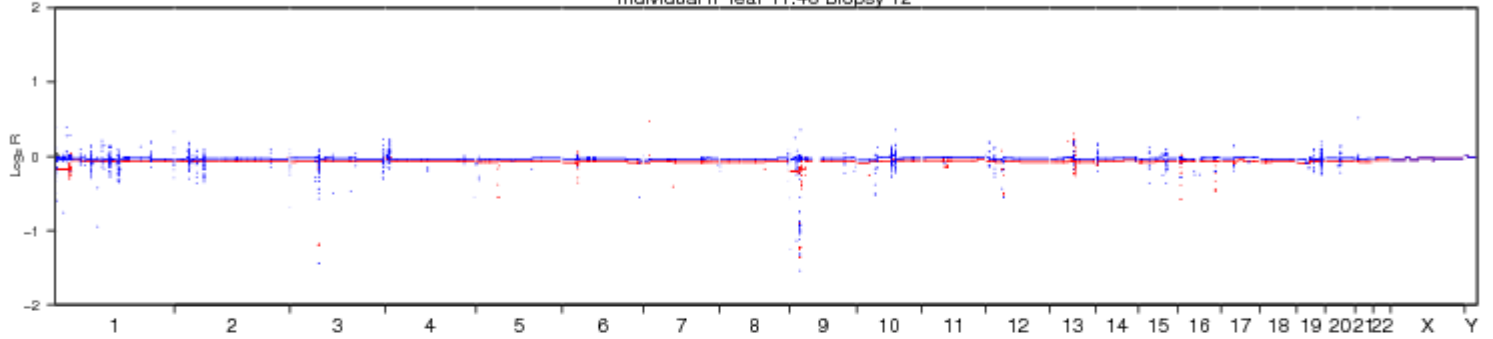

Individual h Year 11.48 Biopsy 12

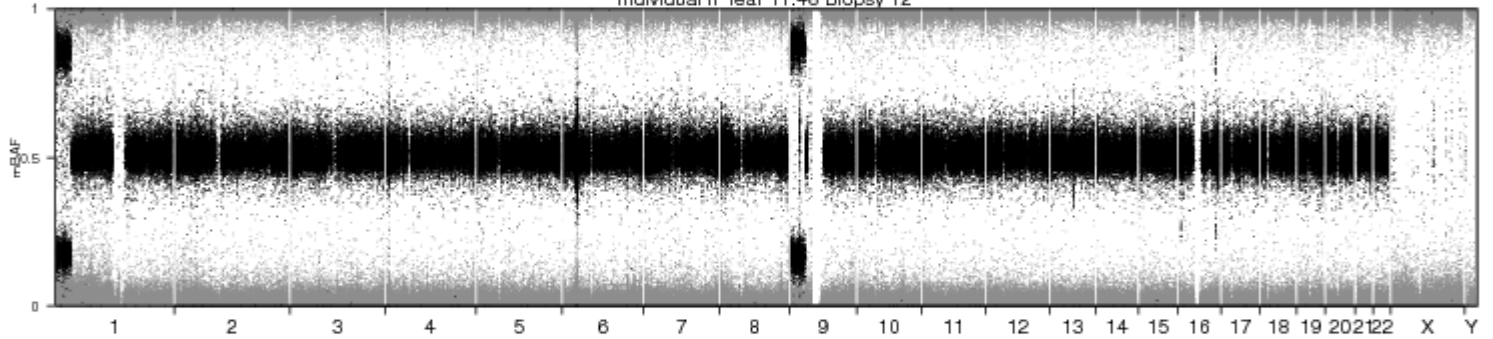

Individual h Year 11.48 Biopsy 12

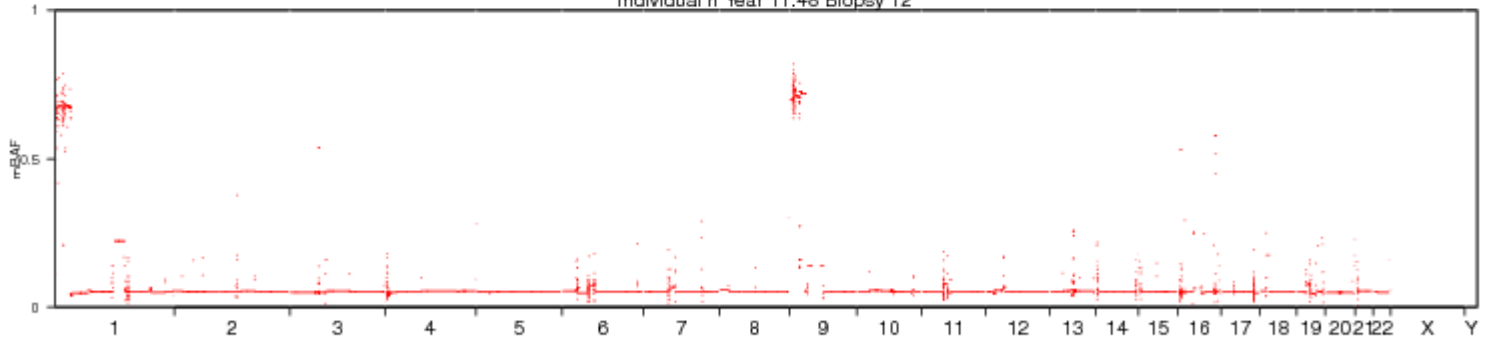

Individual h Year 11.48 Biopsy 12

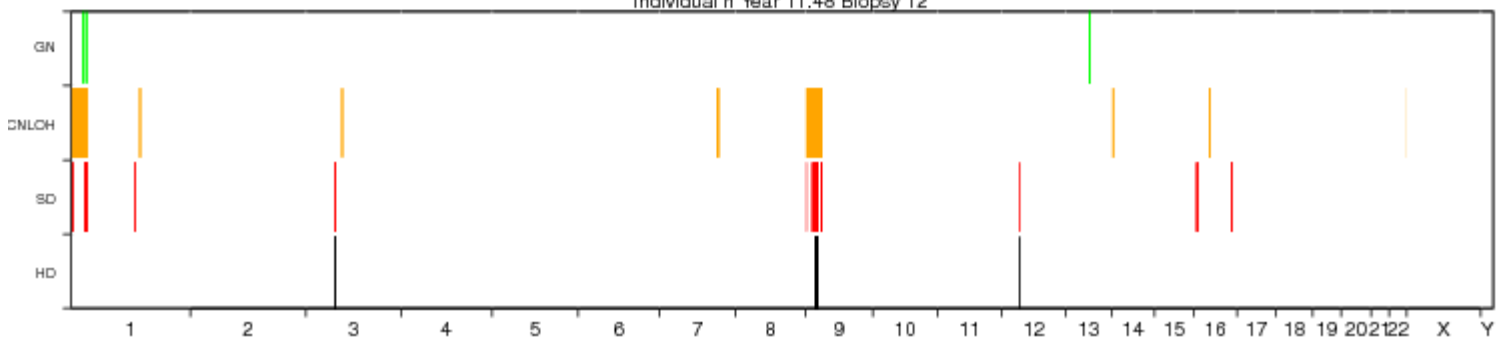

Individual i Year 0 Biopsy 1

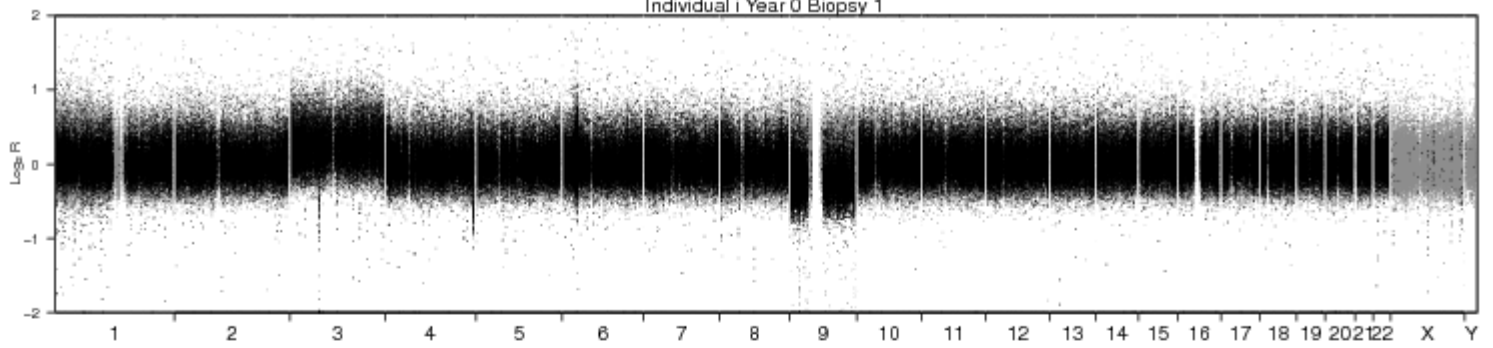

Individual i Year 0 Biopsy 1

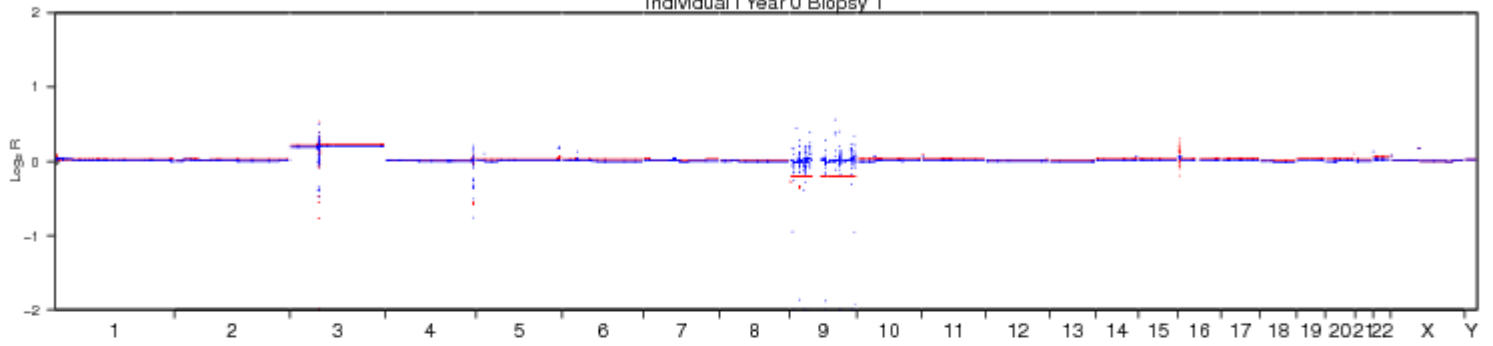

Individual i Year 0 Biopsy 1

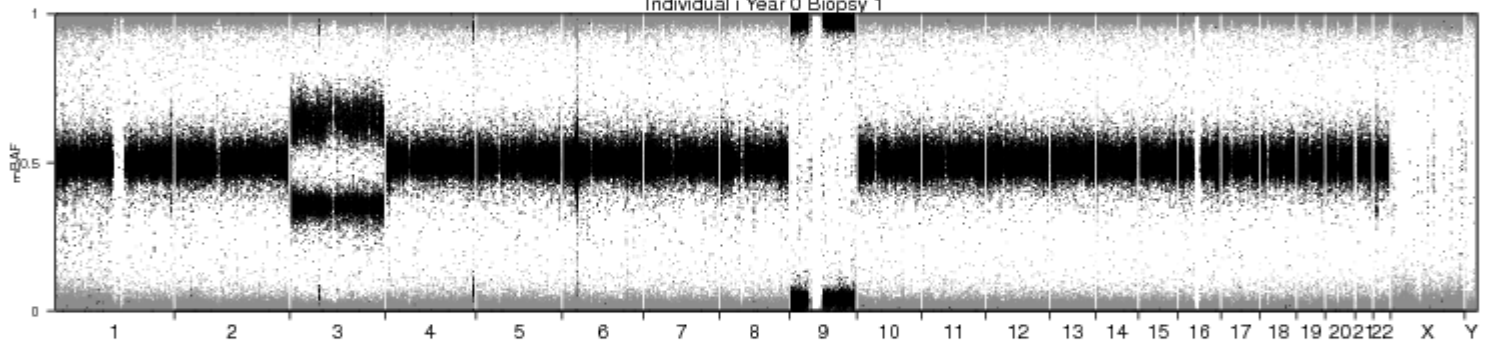

Individual i Year 0 Biopsy 1

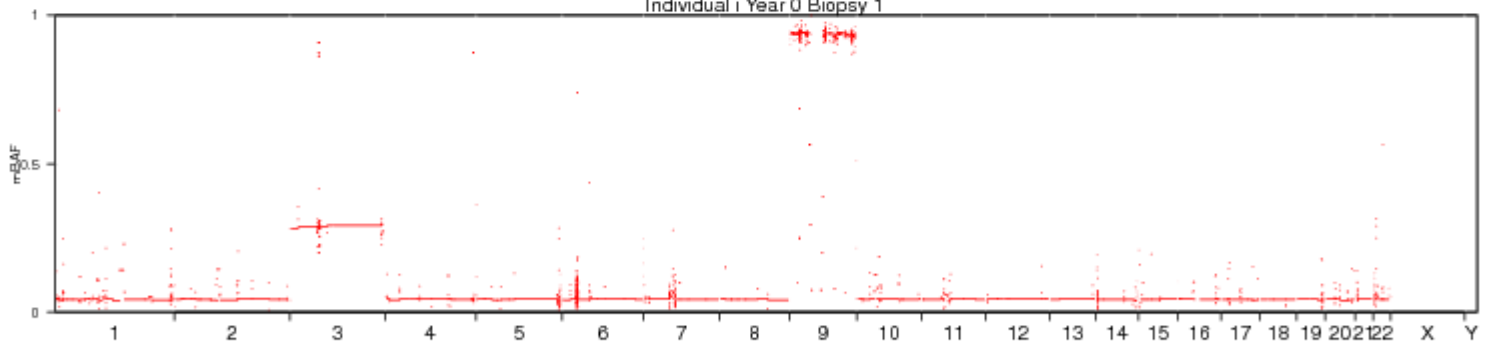

Individual i Year 0 Biopsy 1

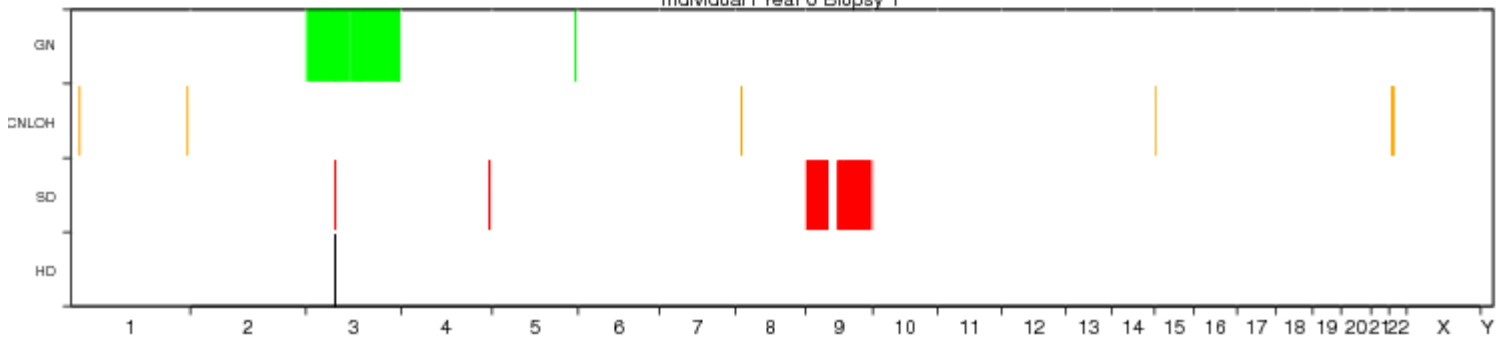

Individual i Year 0 Biopsy 2

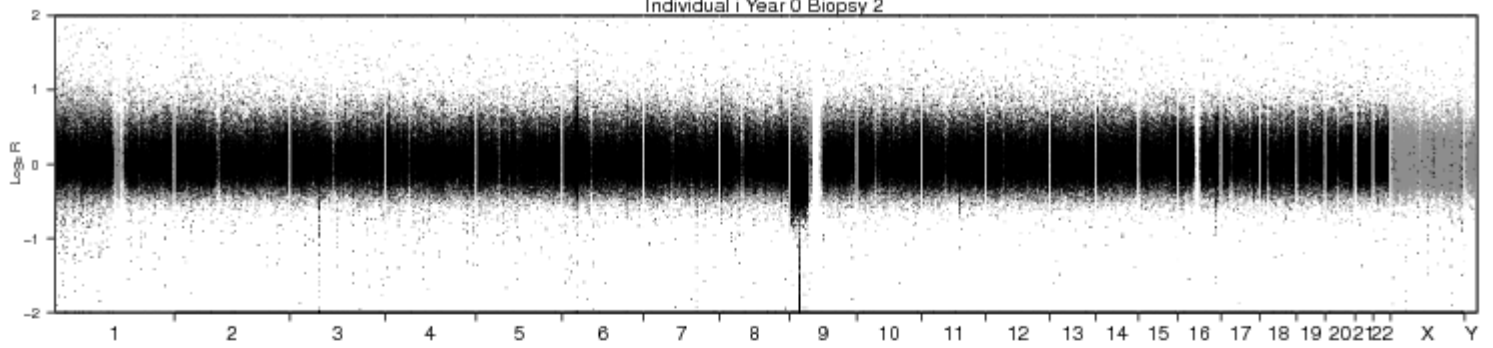

Individual i Year 0 Biopsy 2

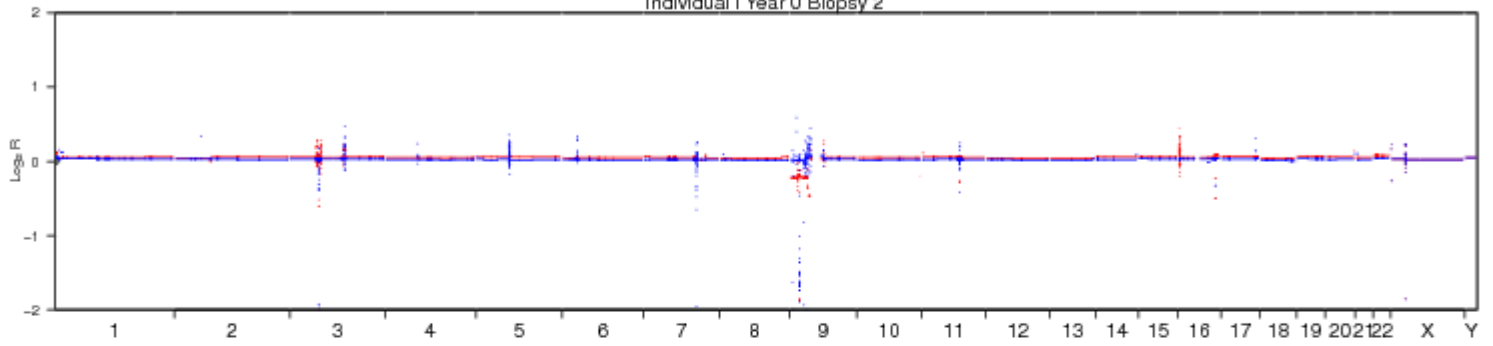

Individual i Year 0 Biopsy 2

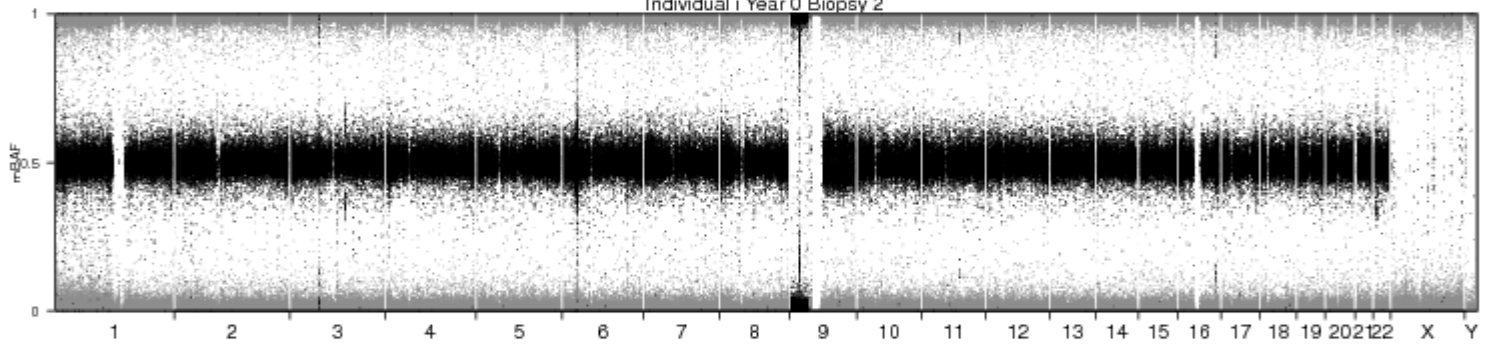

Individual i Year 0 Biopsy 2

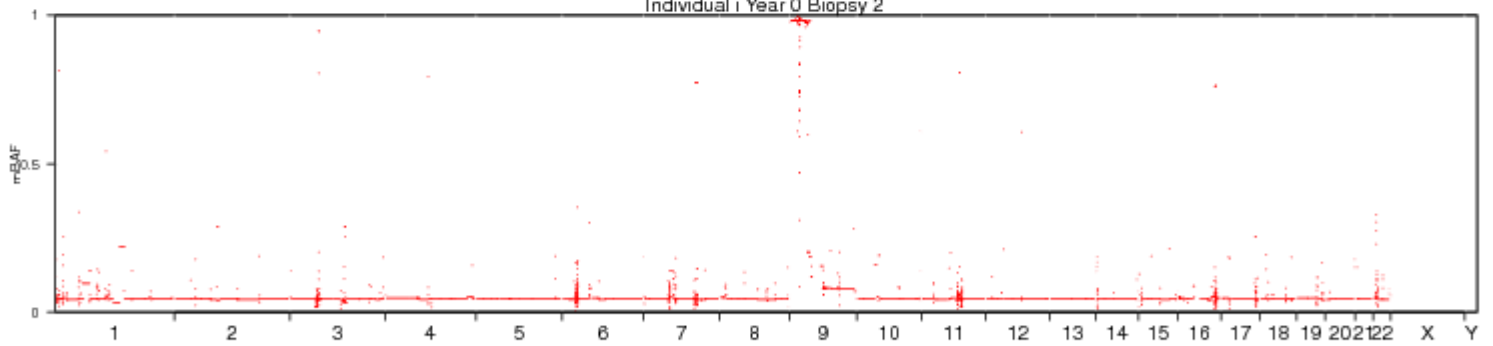

Individual i Year 0 Biopsy 2

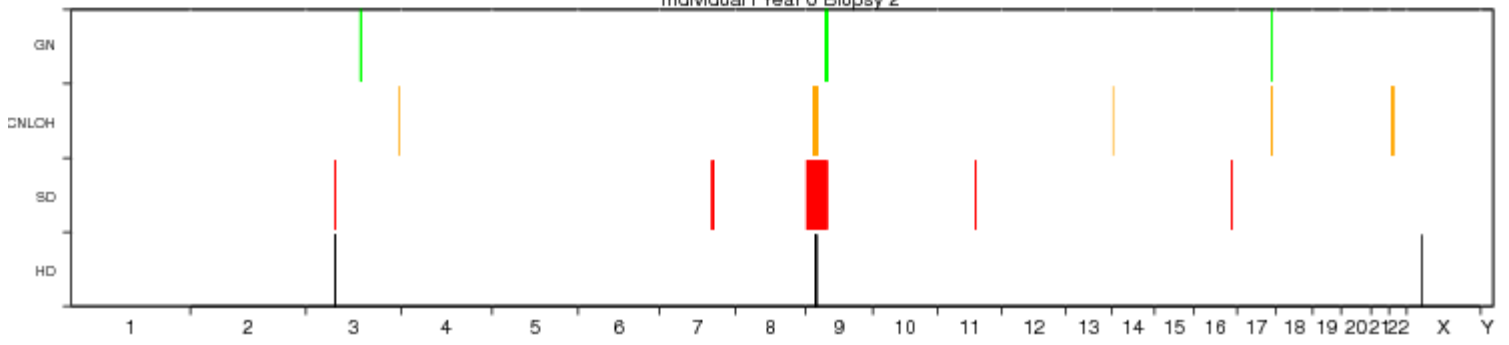

Individual i Year 1.5 Biopsy 3

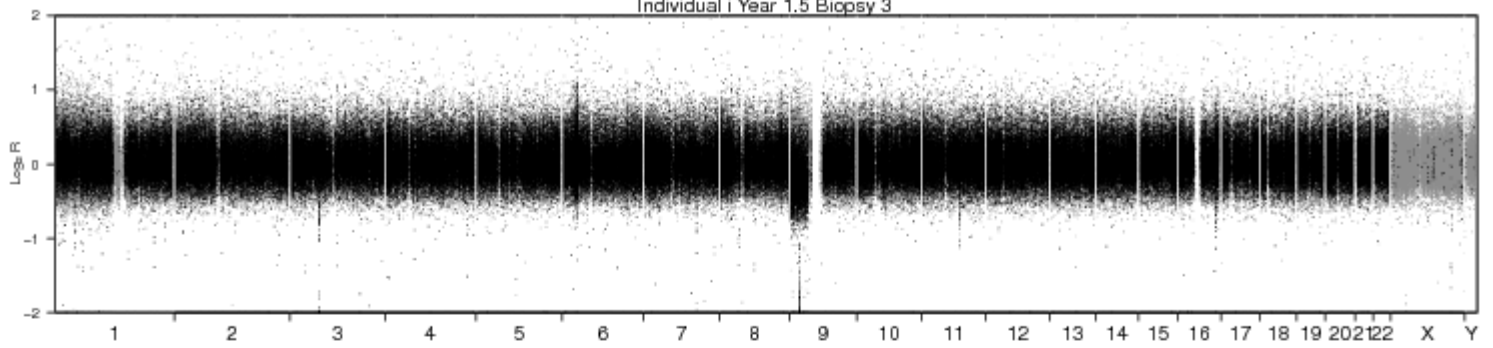

Individual i Year 1.5 Biopsy 3

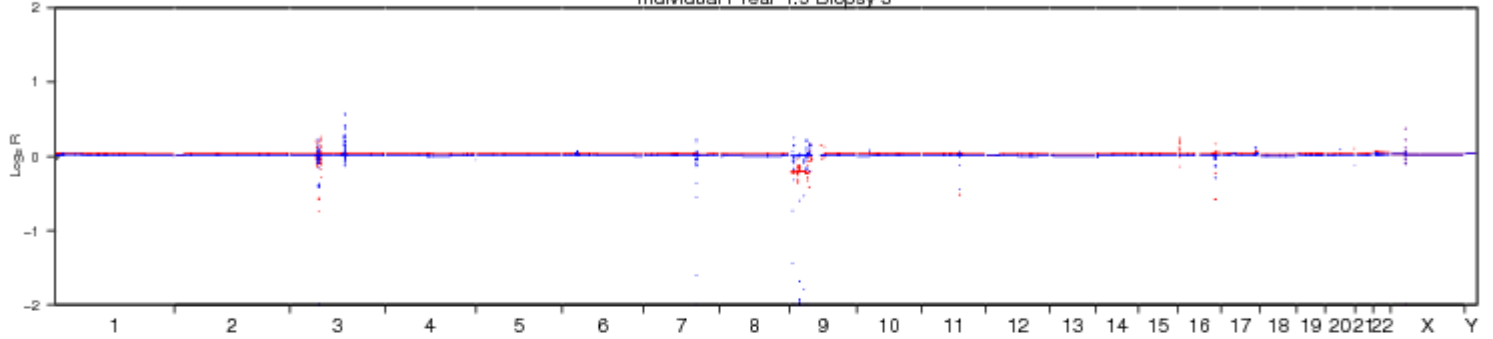

Individual i Year 1.5 Biopsy 3

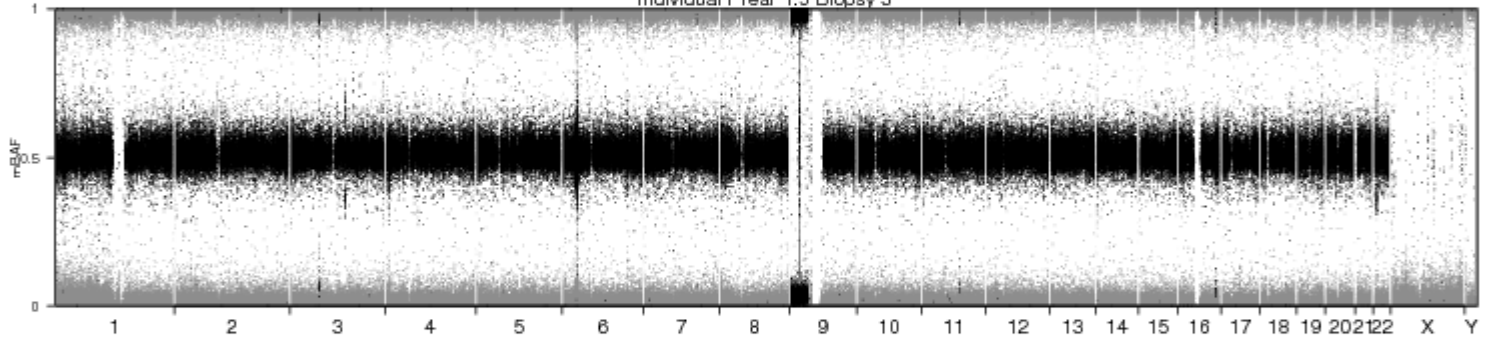

Individual i Year 1.5 Biopsy 3

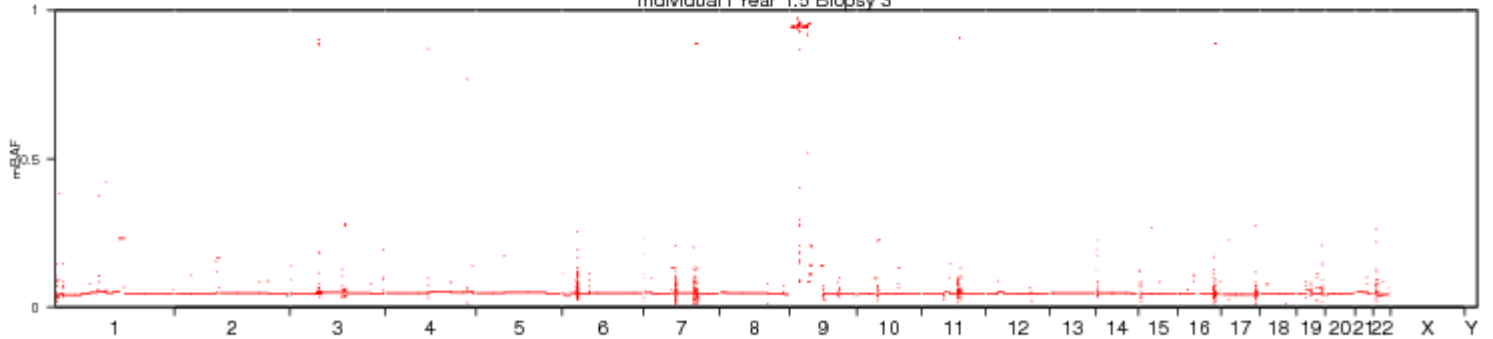

Individual i Year 1.5 Biopsy 3

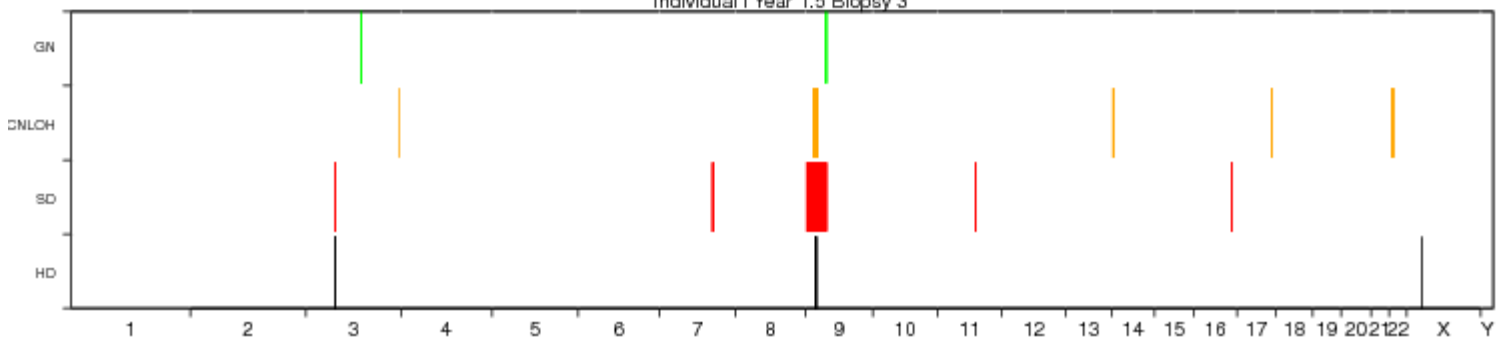



Individual i Year 1.5 Biopsy 4

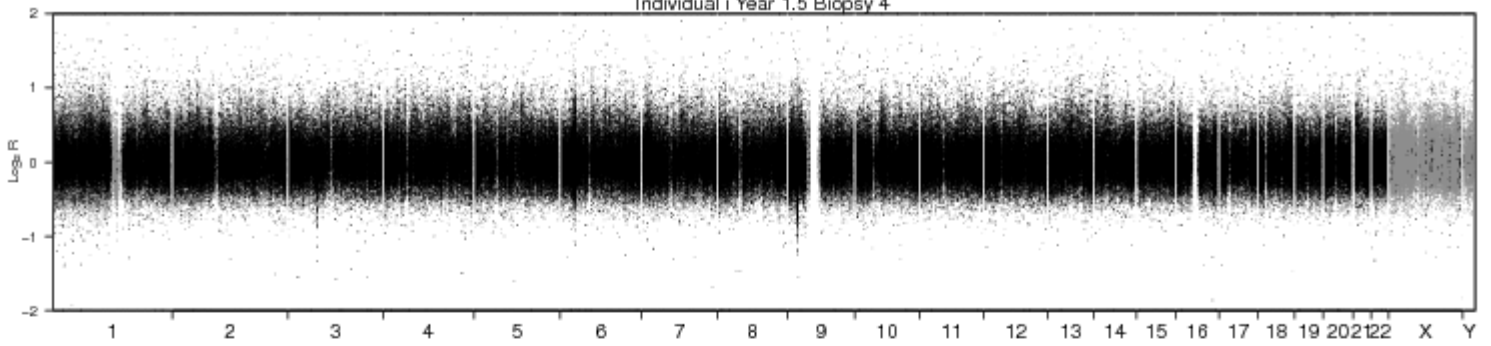

Individual i Year 1.5 Biopsy 4

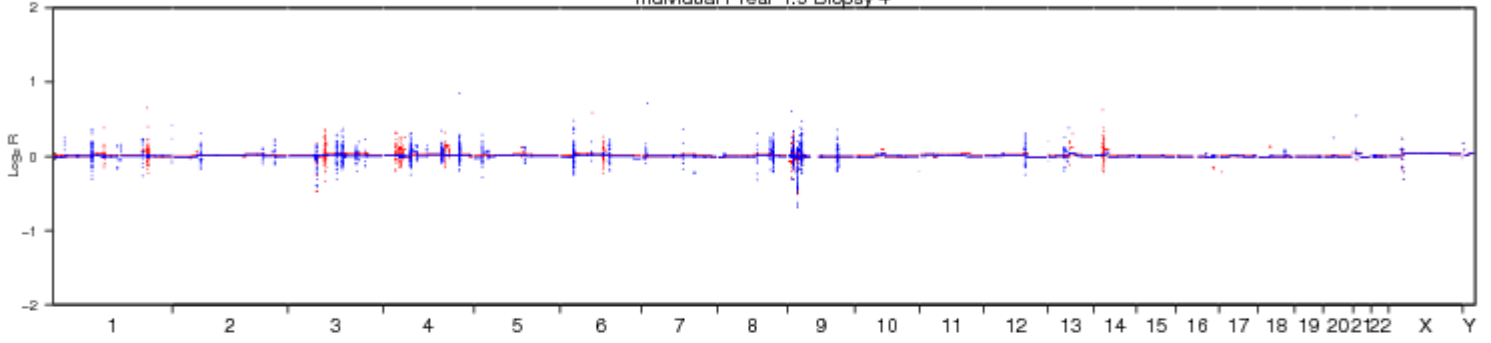

Individual i Year 1.5 Biopsy 4

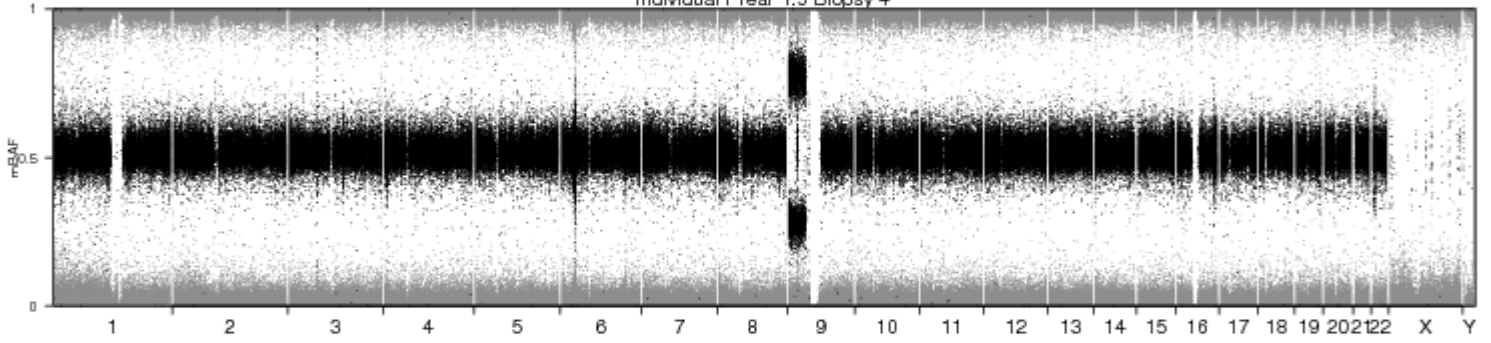

Individual i Year 1.5 Biopsy 4

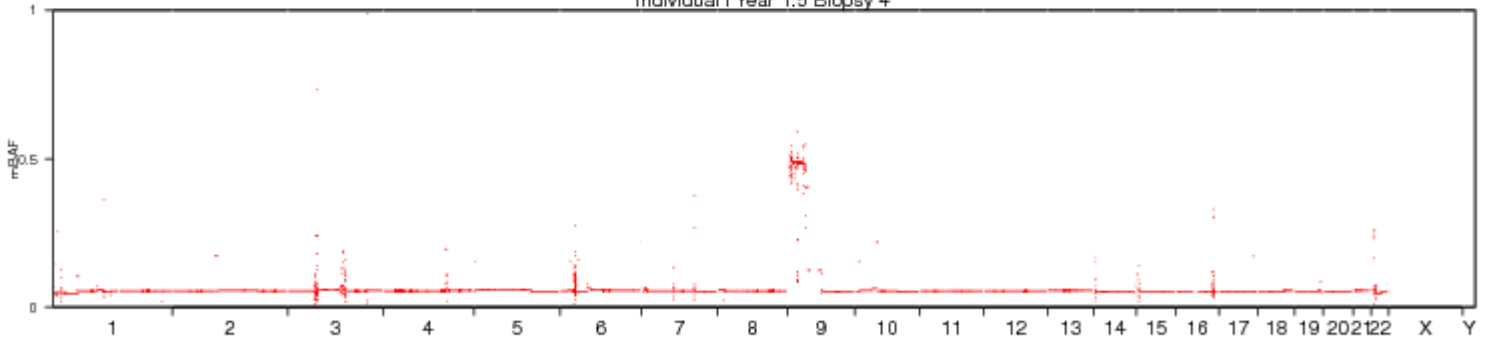

Individual i Year 1.5 Biopsy 4

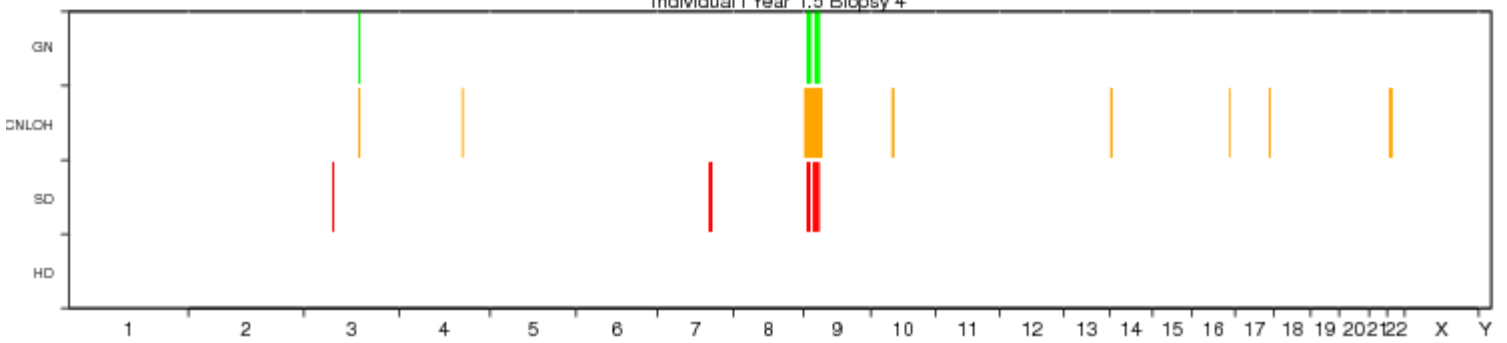

Individual i Year 1.5 Biopsy 5

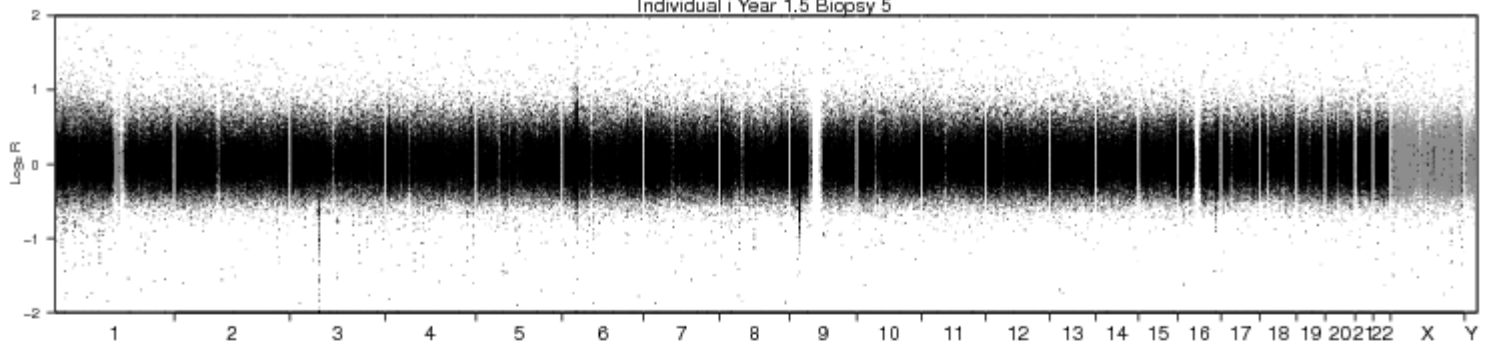

Individual i Year 1.5 Biopsy 5

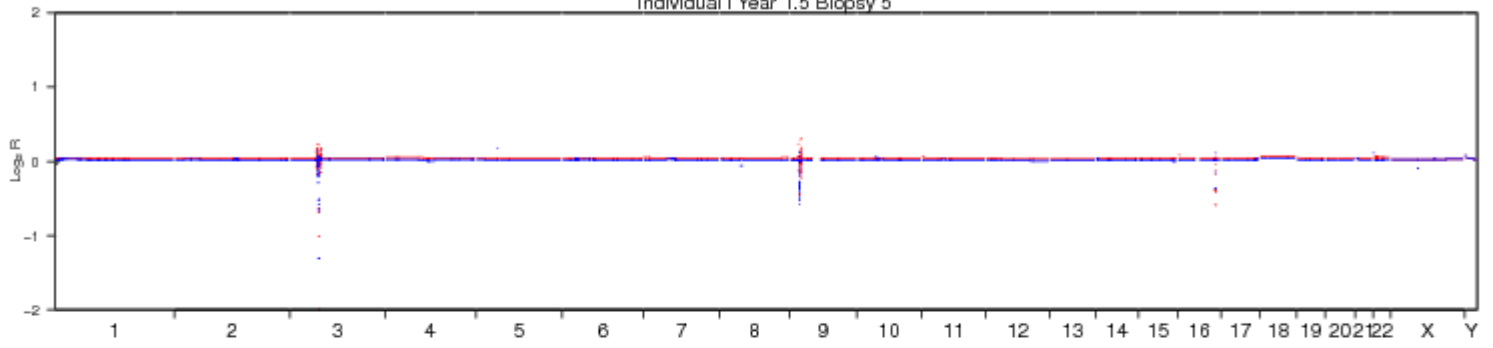

Individual i Year 1.5 Biopsy 5

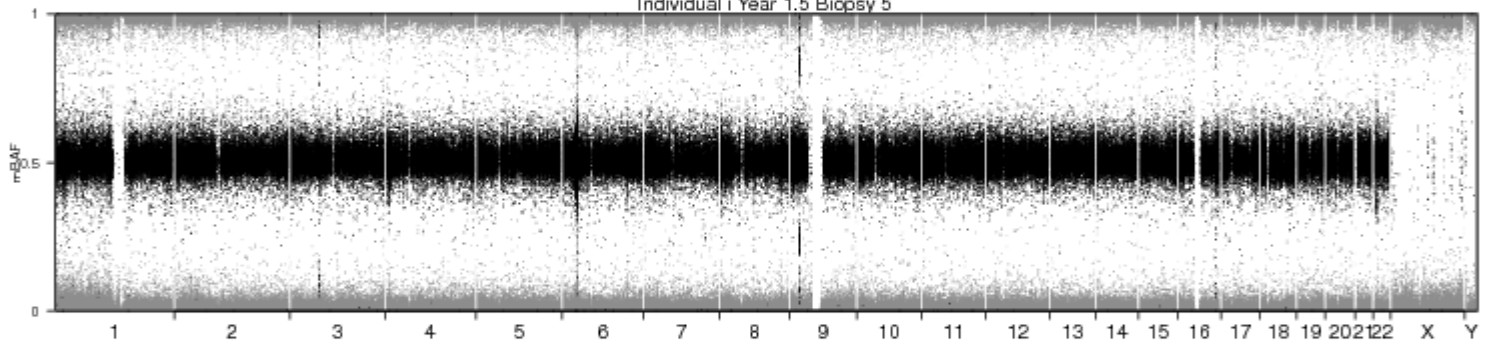

Individual i Year 1.5 Biopsy 5

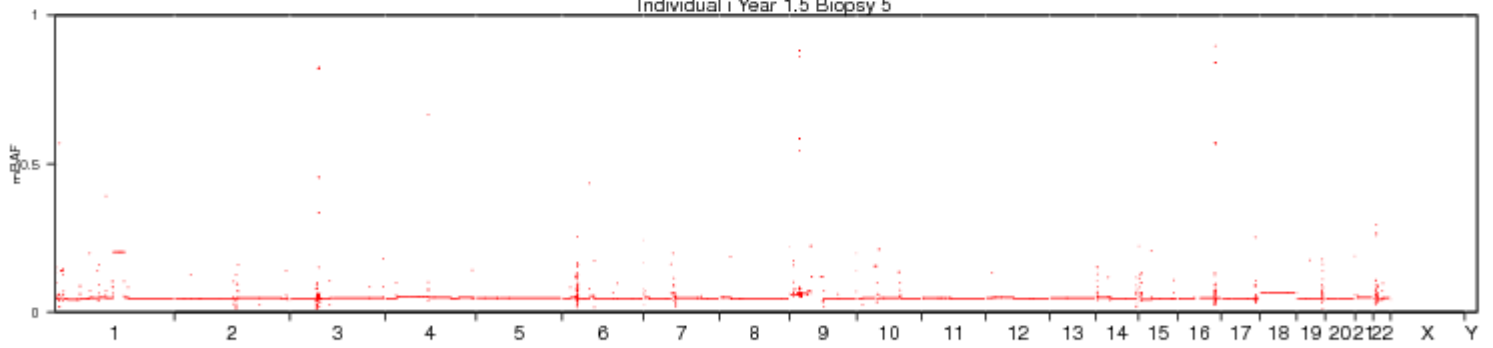

Individual i Year 1.5 Biopsy 5

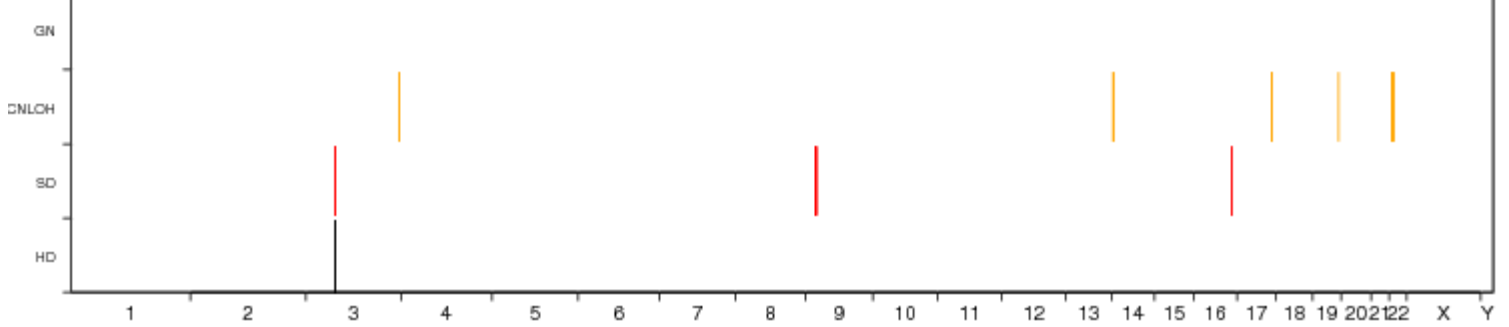

Individual i Year 3.08 Biopsy 6

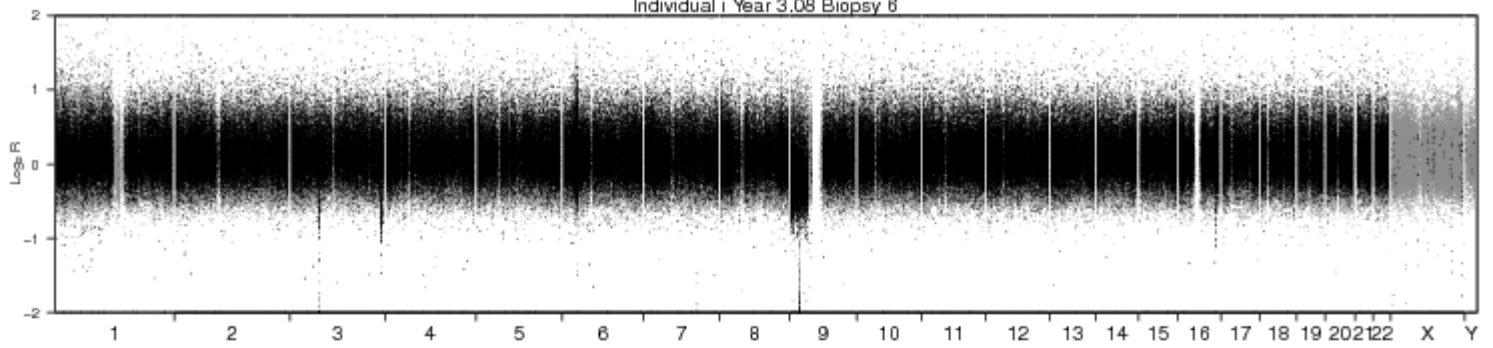

Individual i Year 3.08 Biopsy 6

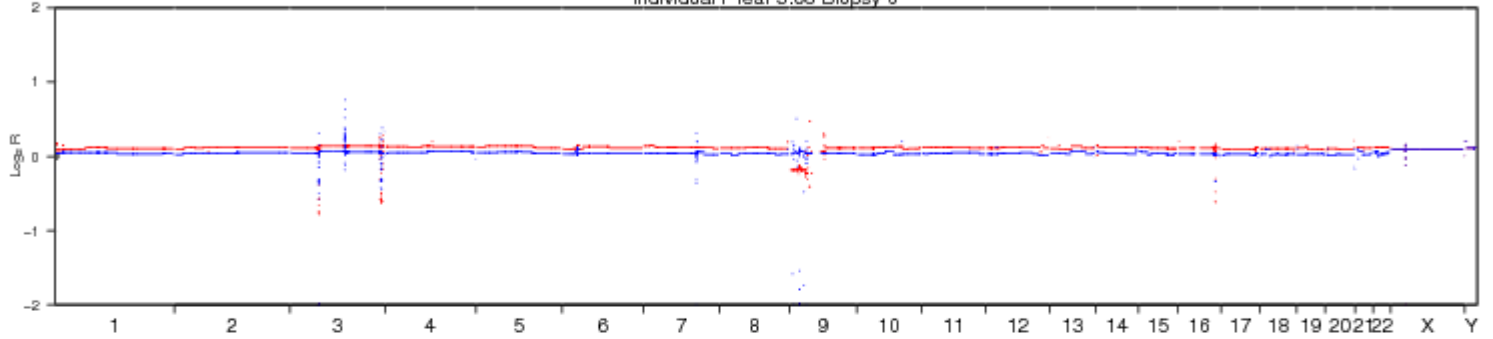

Individual i Year 3.08 Biopsy 6

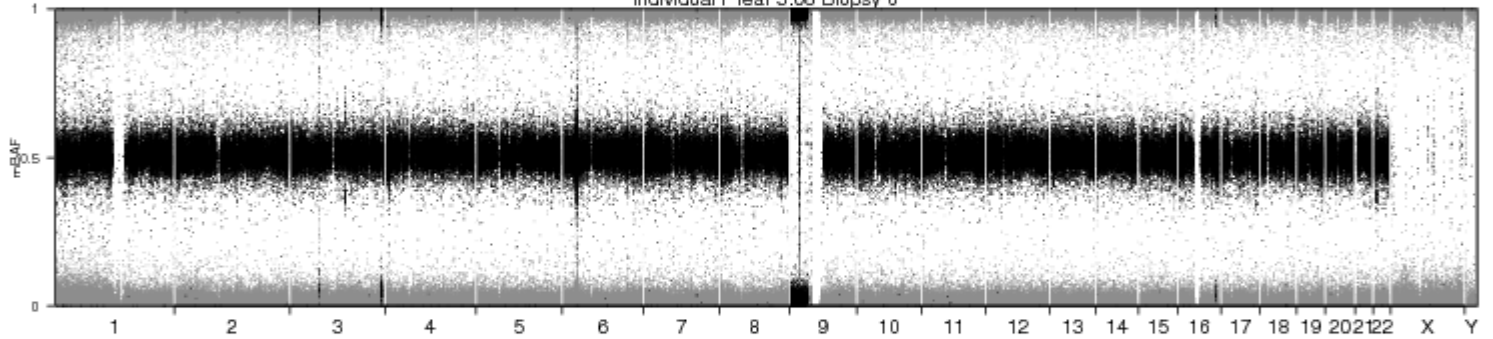

Individual i Year 3.08 Biopsy 6

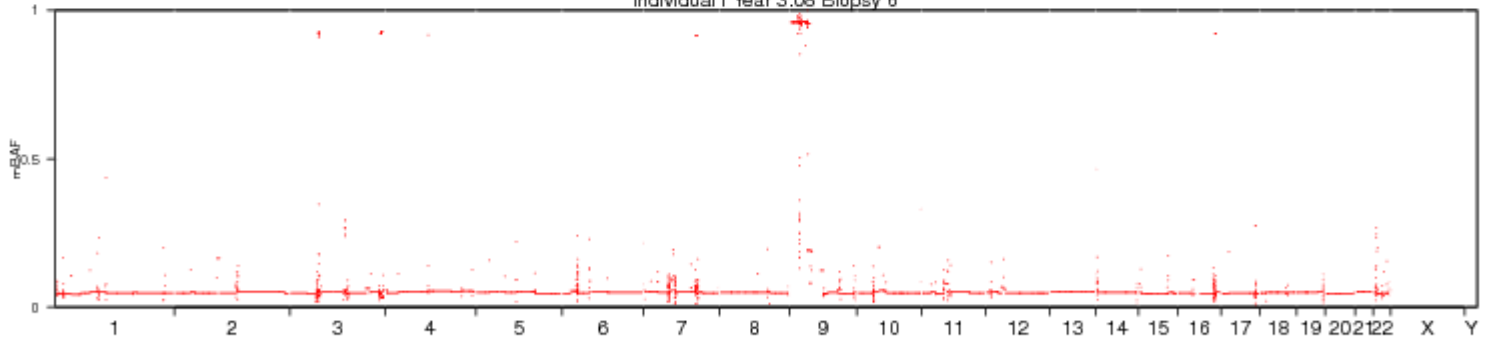

Individual i Year 3.08 Biopsy 6

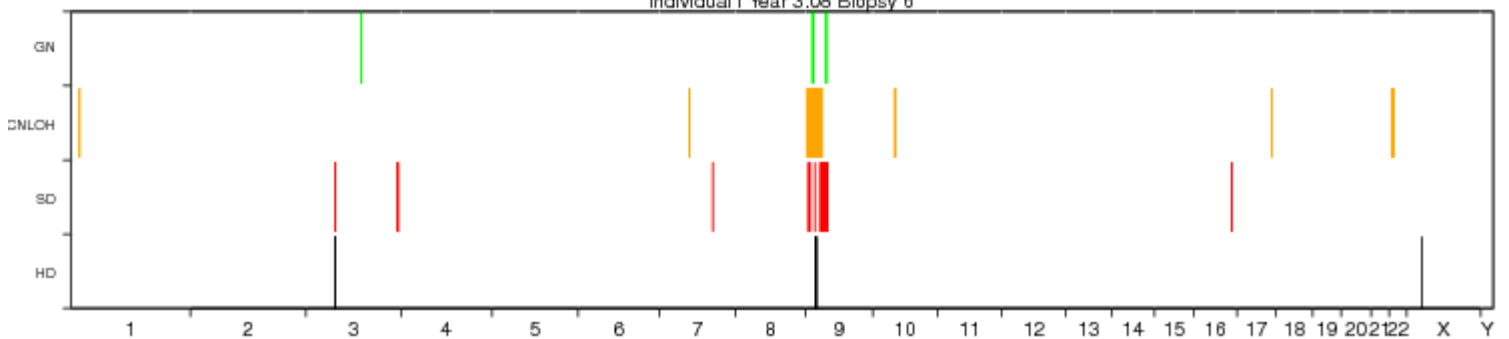

Individual i Year 3.08 Biopsy 7

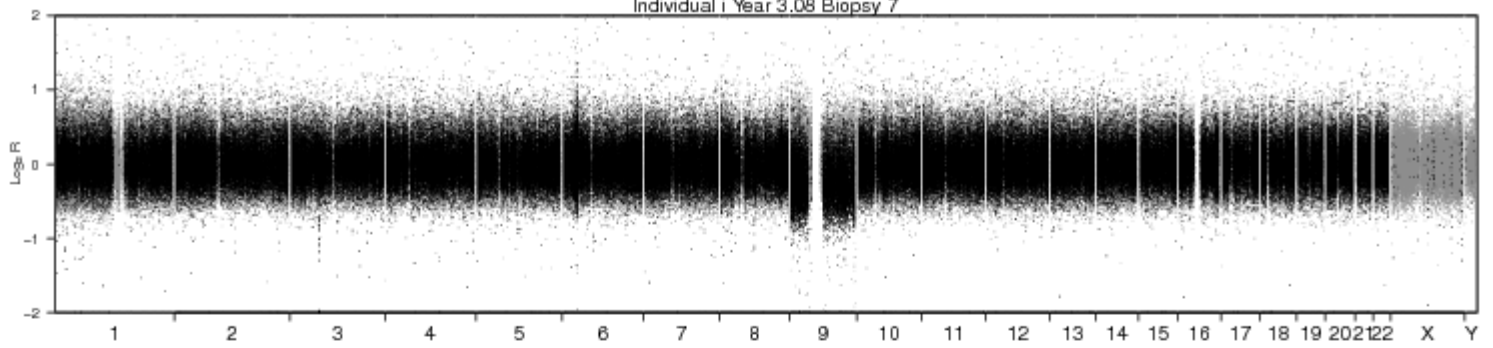

Individual i Year 3.08 Biopsy 7

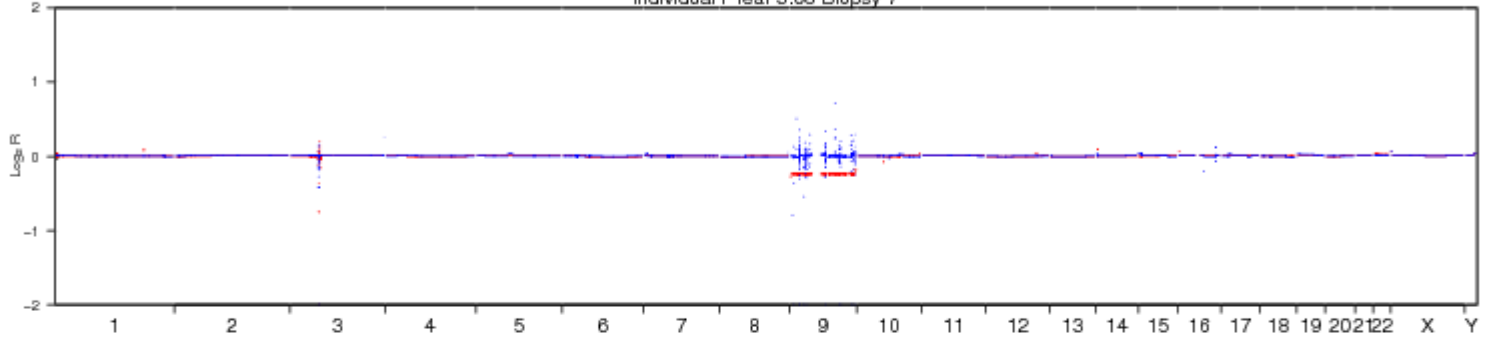

Individual i Year 3.08 Biopsy 7

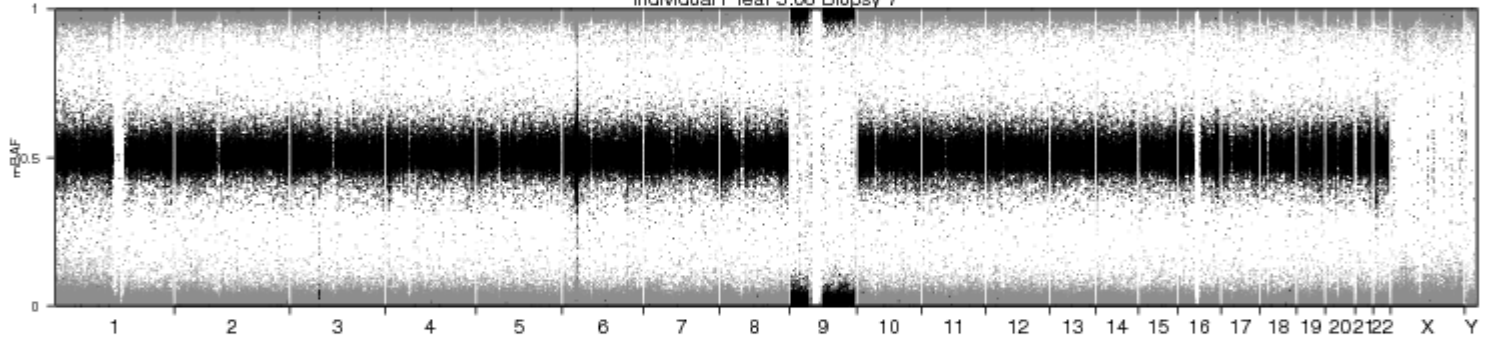

Individual i Year 3.08 Biopsy 7

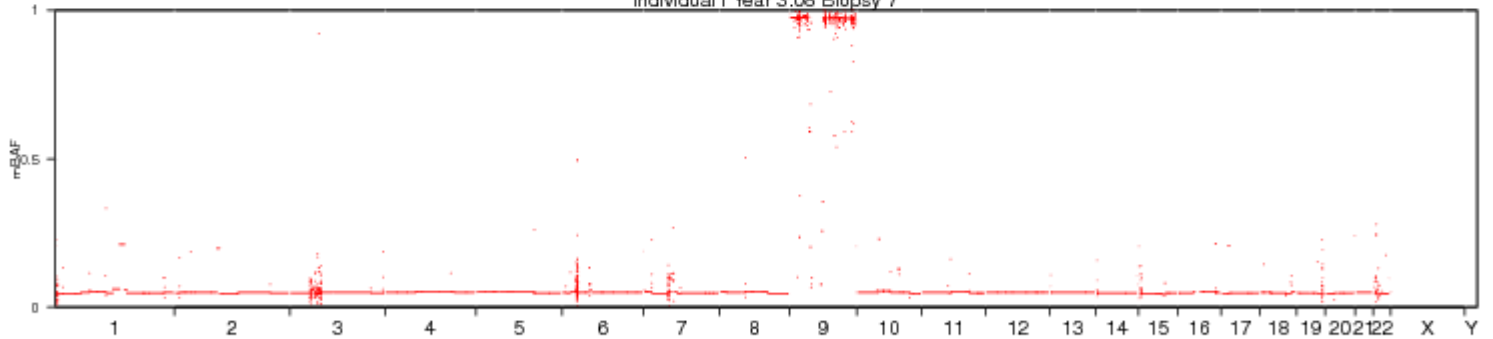

Individual i Year 3.08 Biopsy 7

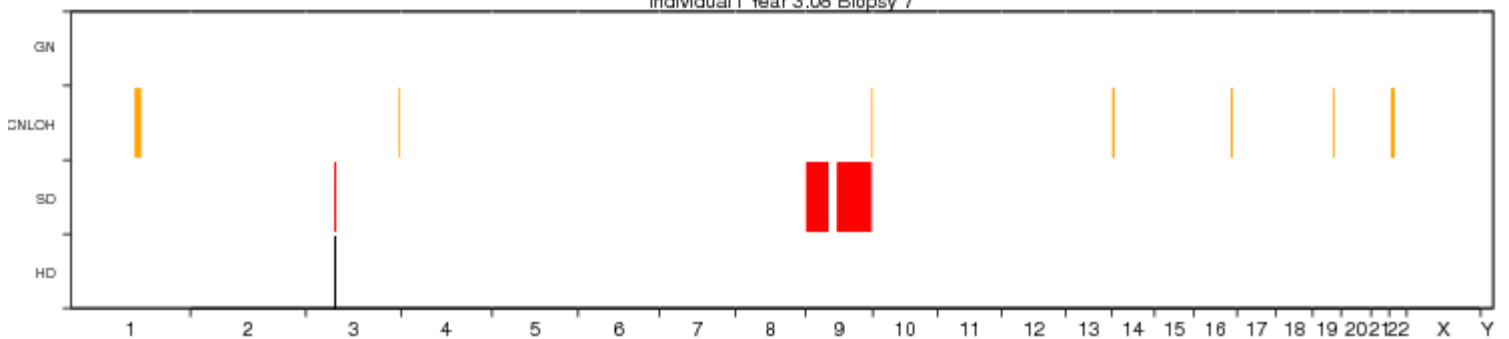



Individual i Year 7.83 Biopsy 8

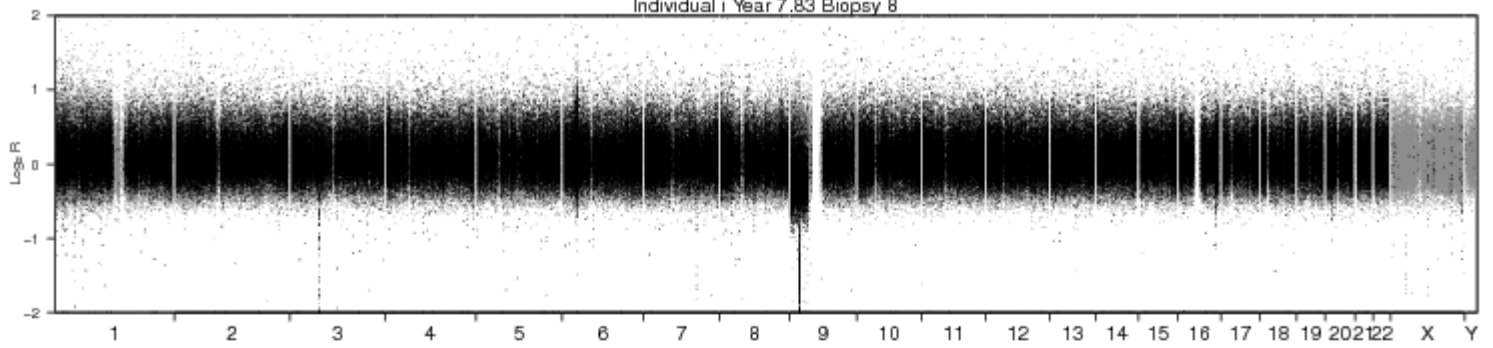

Individual i Year 7.83 Biopsy 8

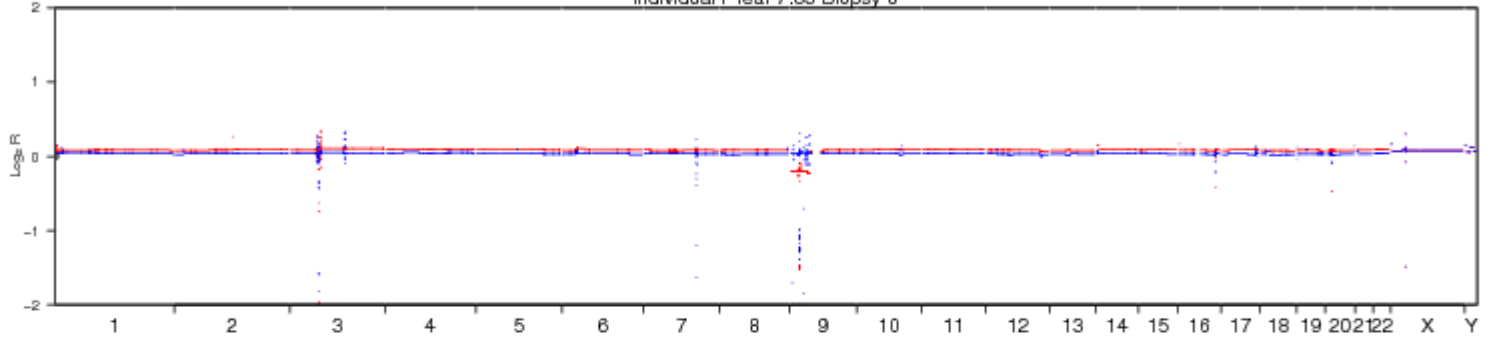

Individual i Year 7.83 Biopsy 8

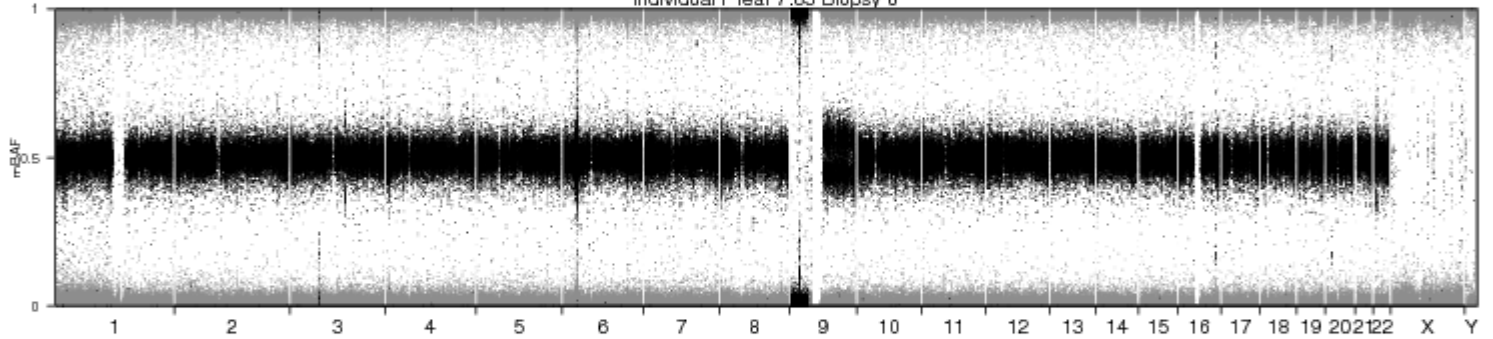

Individual i Year 7.83 Biopsy 8

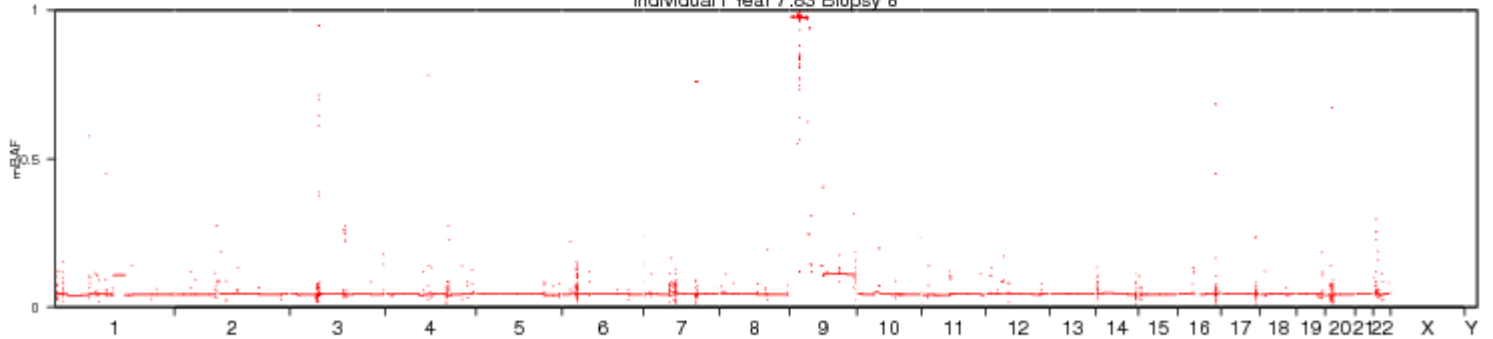

Individual i Year 7.83 Biopsy 8

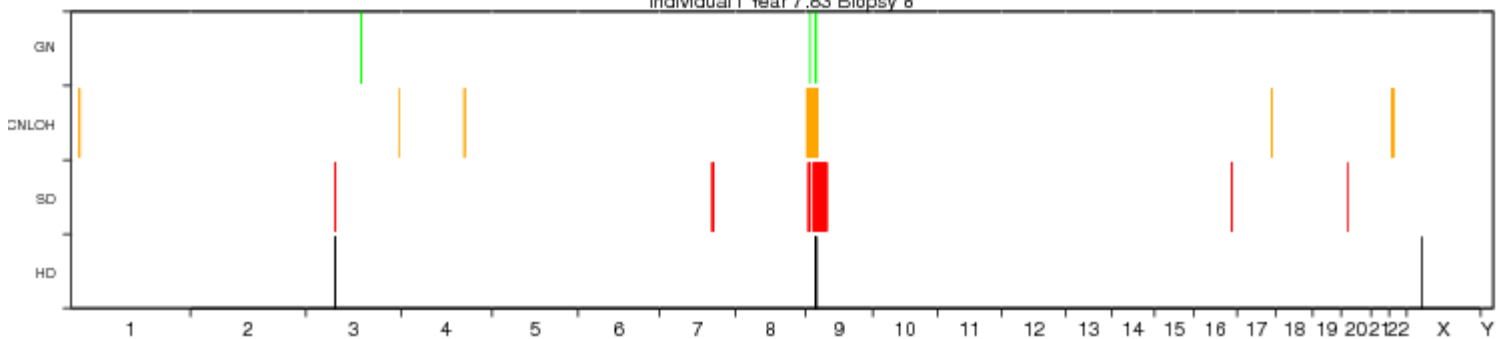

Individual i Year 7.83 Biopsy 9

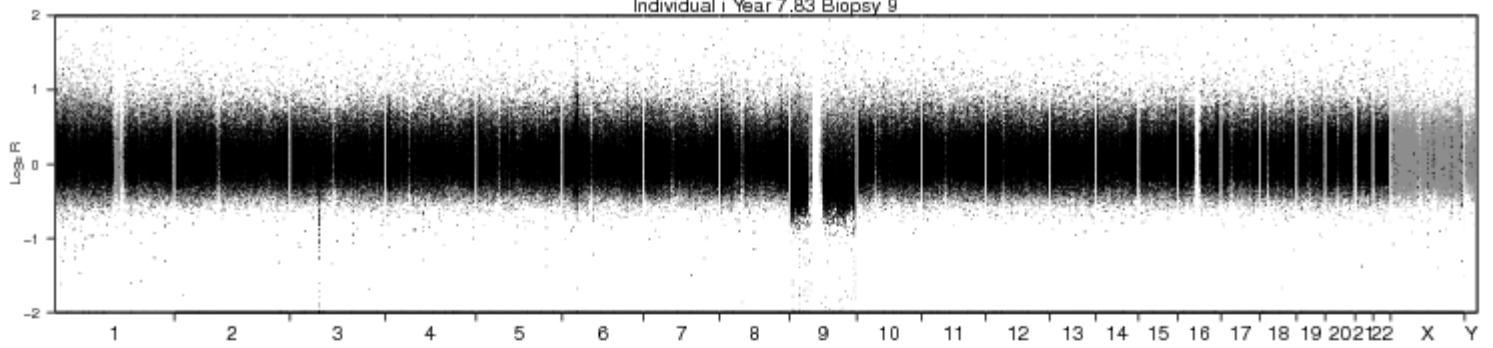

Individual i Year 7.83 Biopsy 9

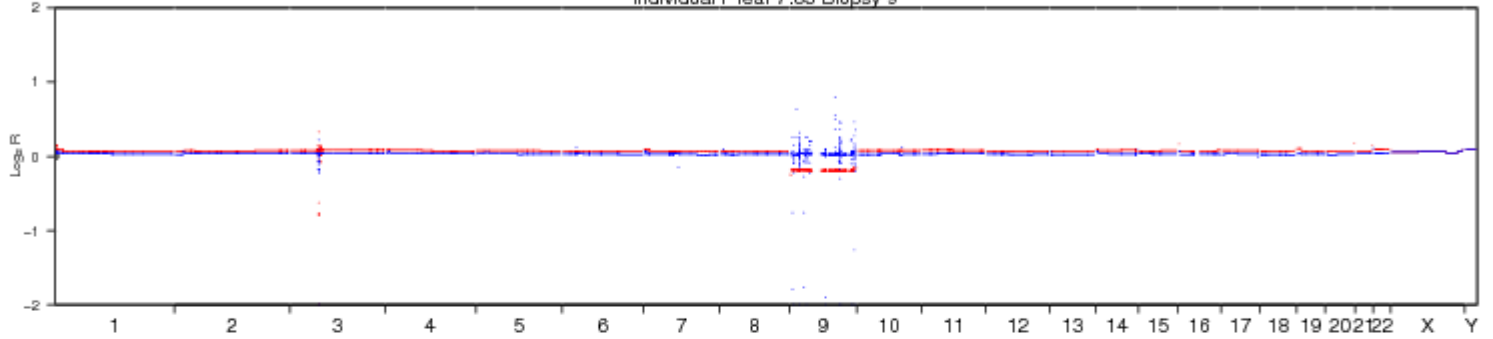

Individual i Year 7.83 Biopsy 9

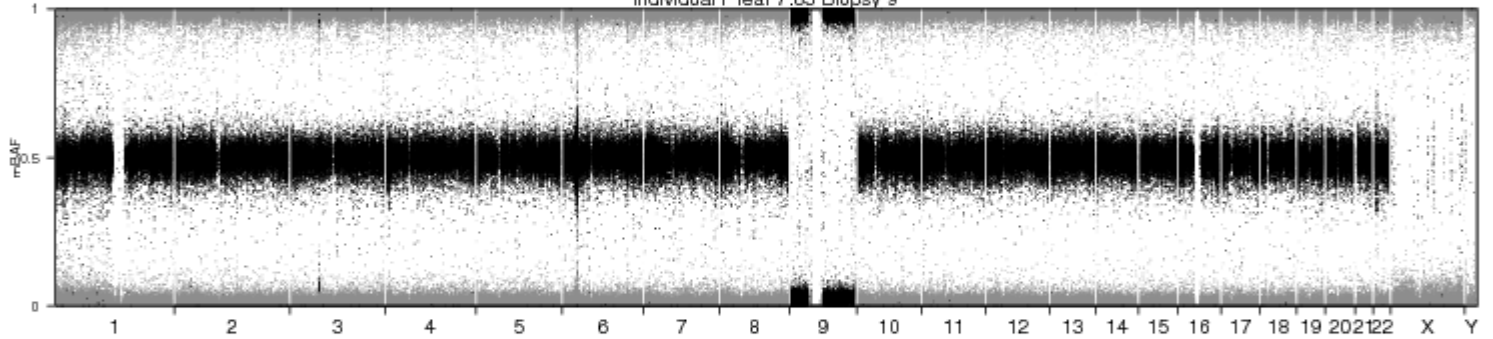

Individual i Year 7.83 Biopsy 9

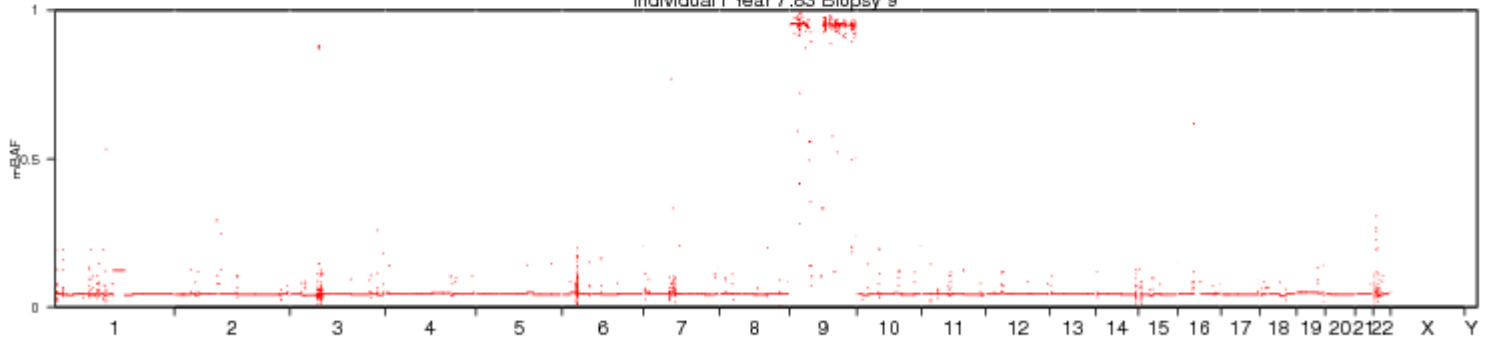

Individual i Year 7.83 Biopsy 9

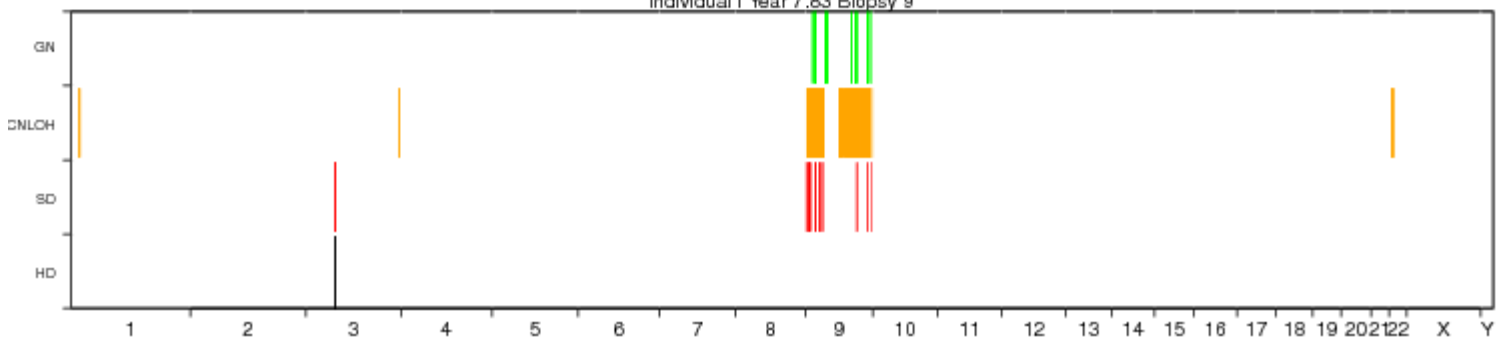

Individual i Year 10.95 Biopsy 10

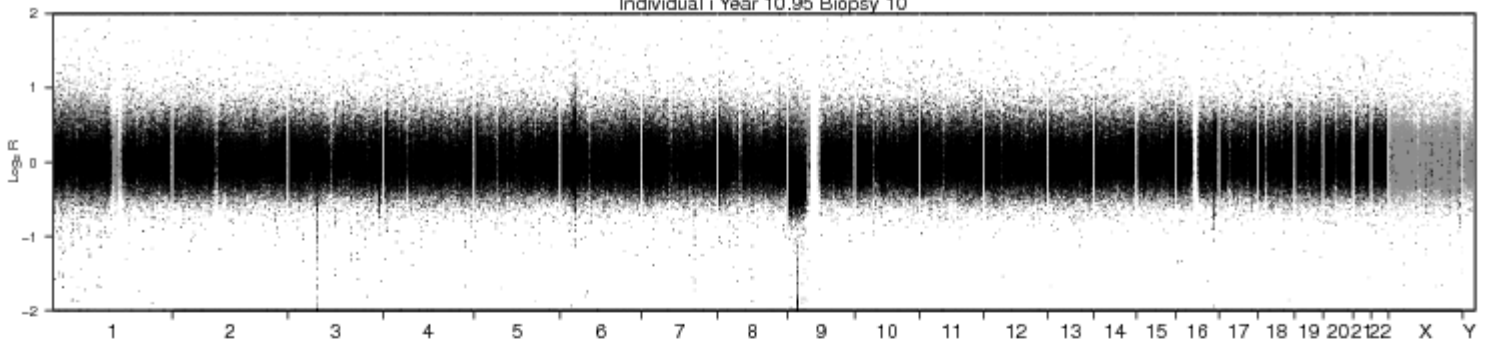

Individual i Year 10.95 Biopsy 10

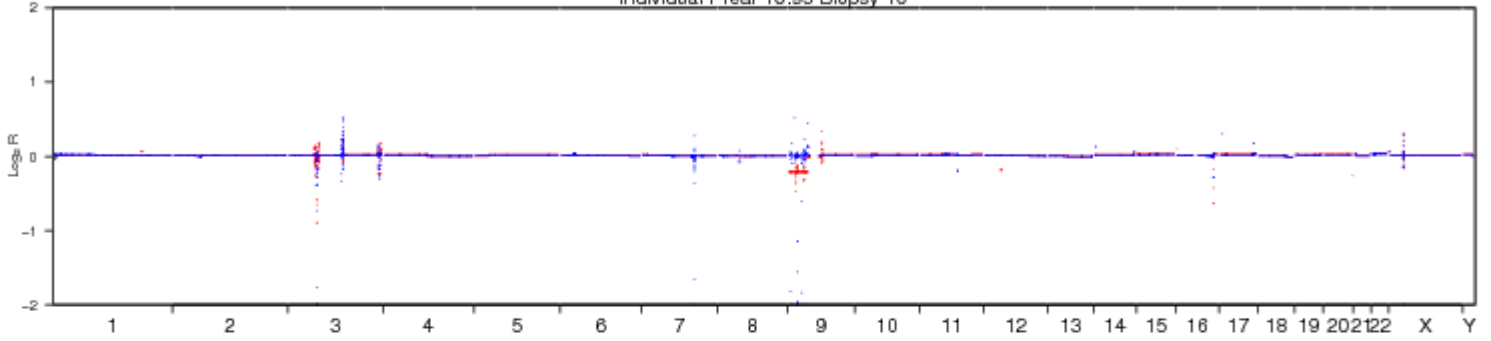

Individual i Year 10.95 Biopsy 10

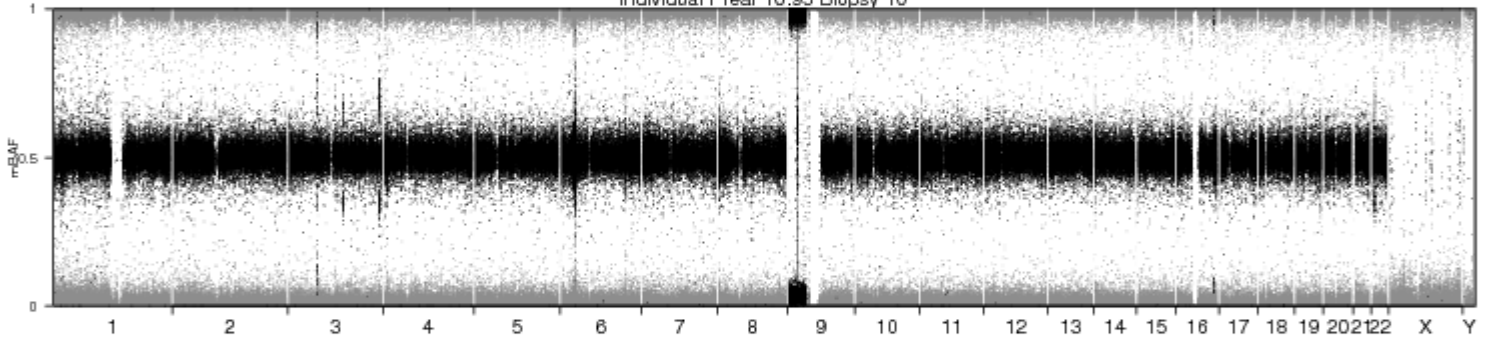

Individual i Year 10.95 Biopsy 10

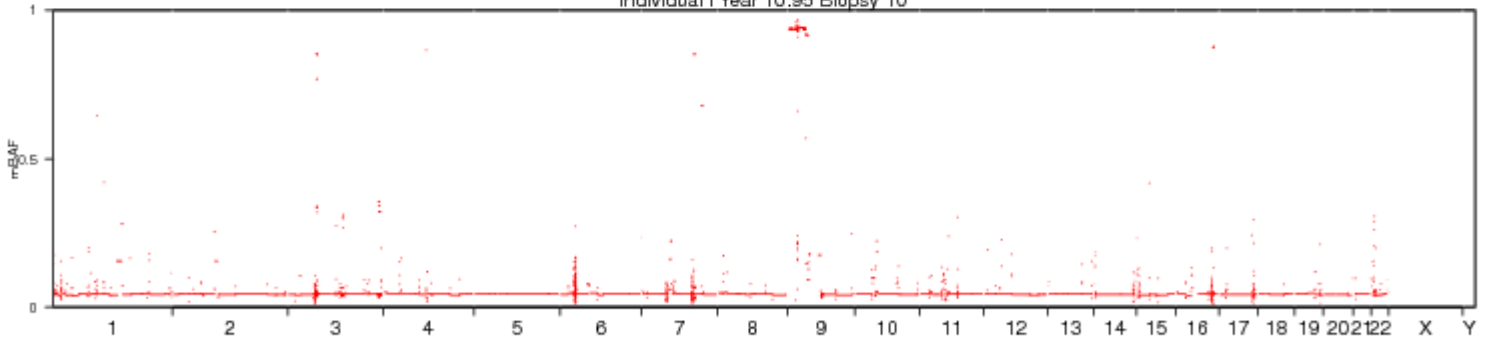

Individual i Year 10.95 Biopsy 10

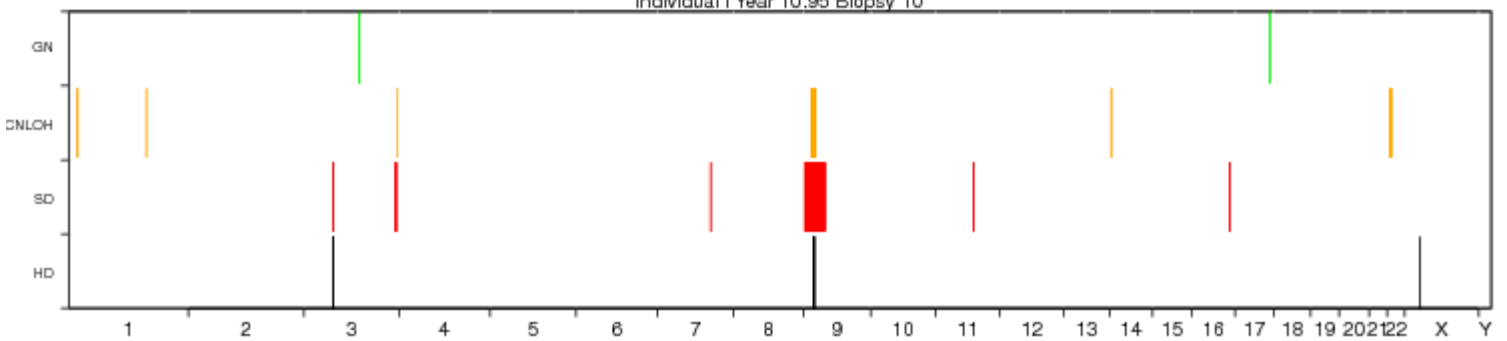

Individual i Year 10.95 Biopsy 11

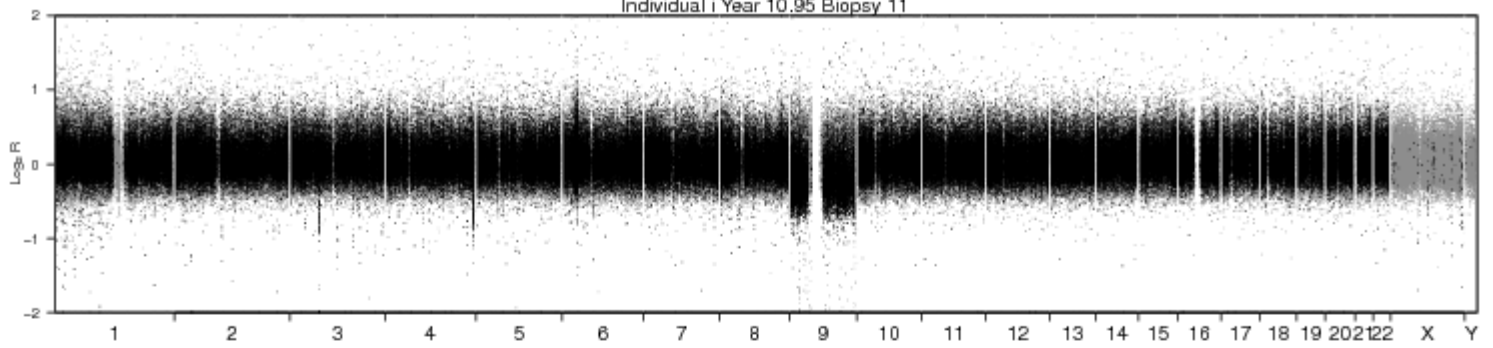

Individual i Year 10.95 Biopsy 11

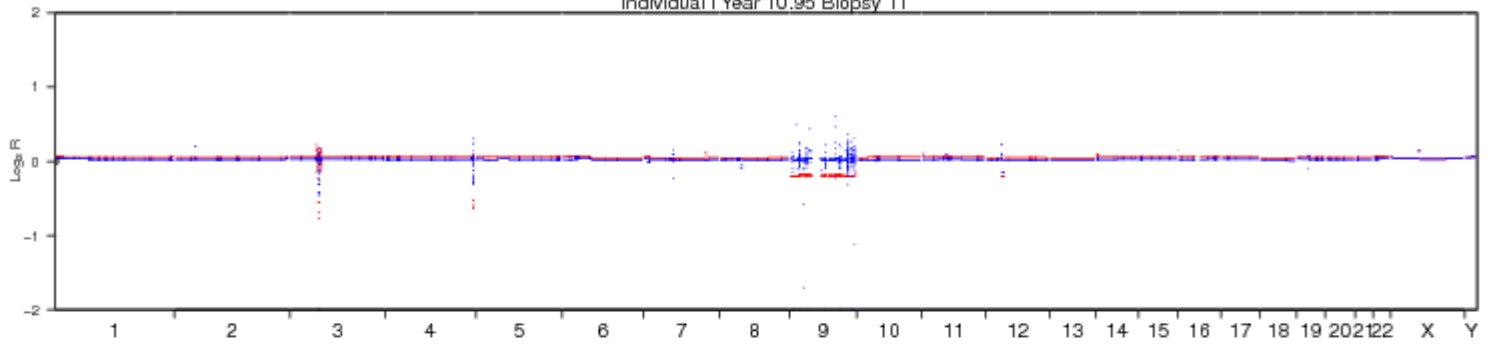

Individual i Year 10.95 Biopsy 11

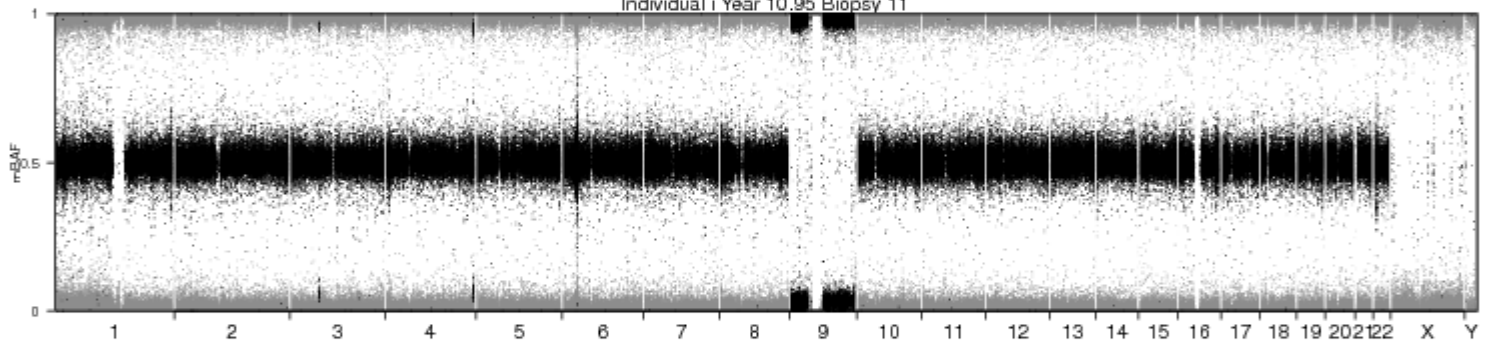

Individual i Year 10.95 Biopsy 11

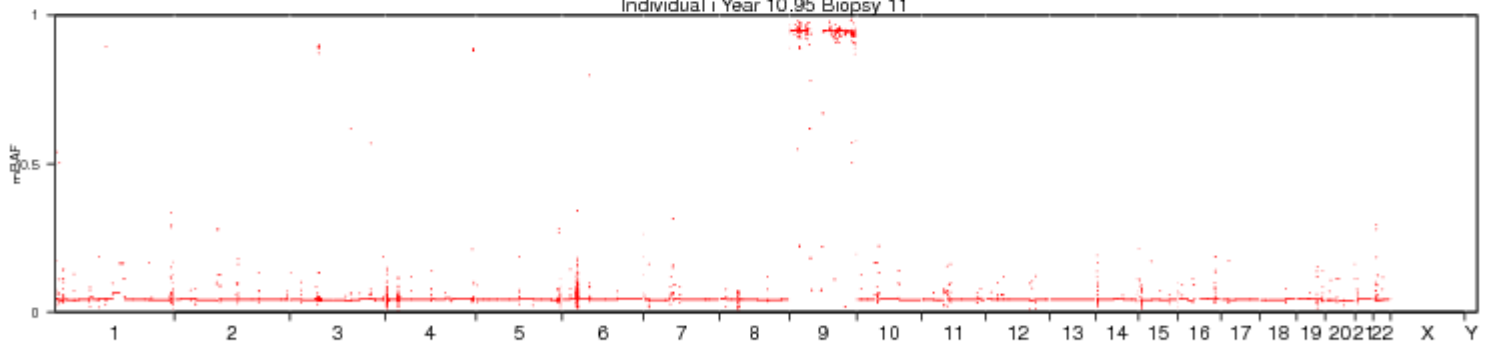

Individual i Year 10.95 Biopsy 11

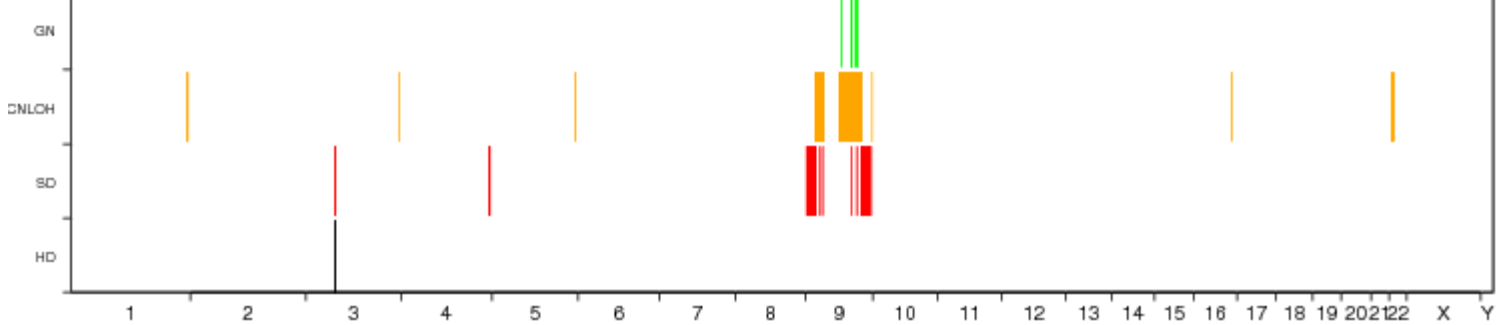



Individual i Year 12.99 Biopsy 12

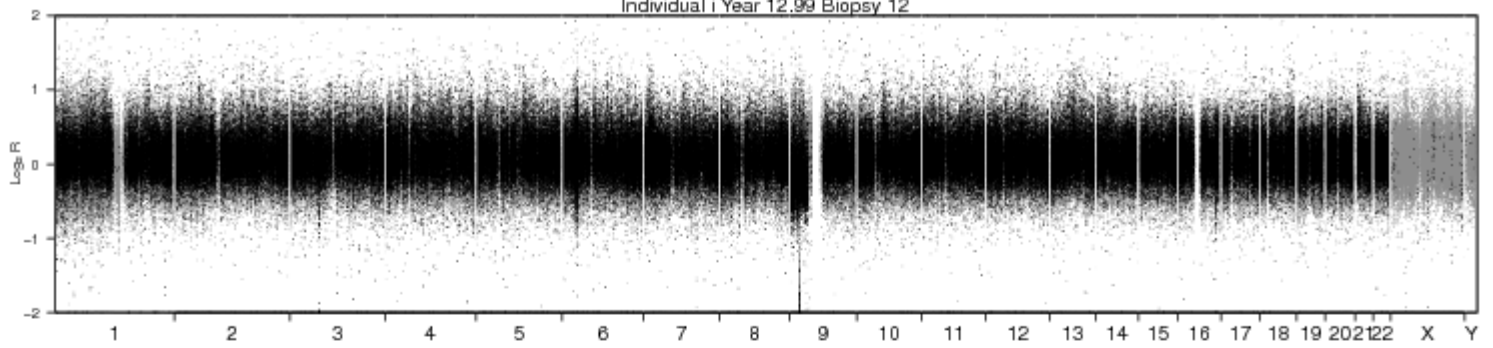

Individual i Year 12.99 Biopsy 12

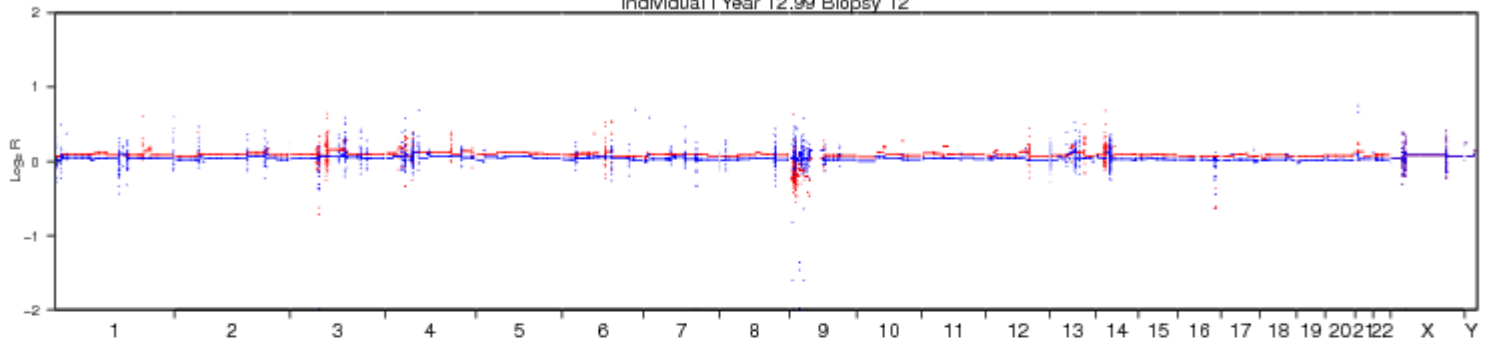

Individual i Year 12.99 Biopsy 12

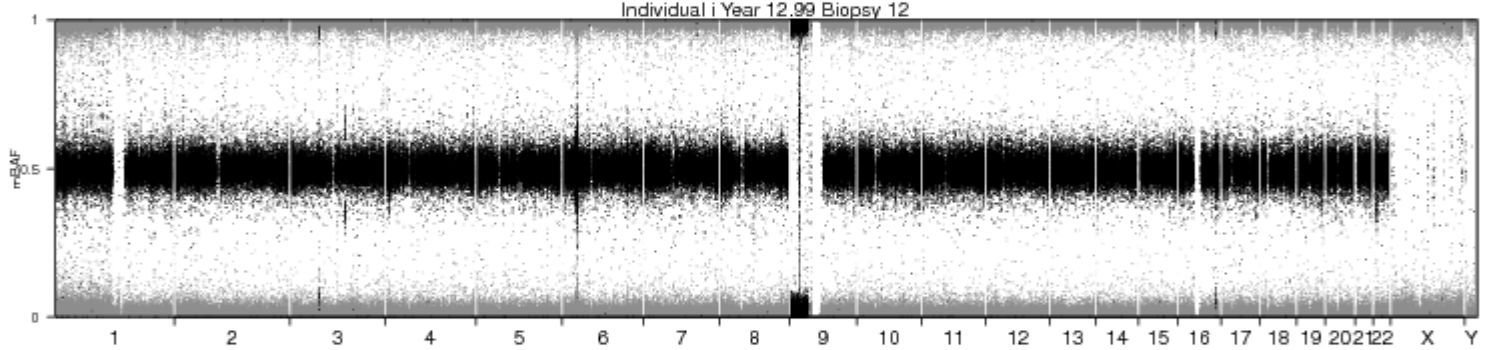

Individual i Year 12.99 Biopsy 12

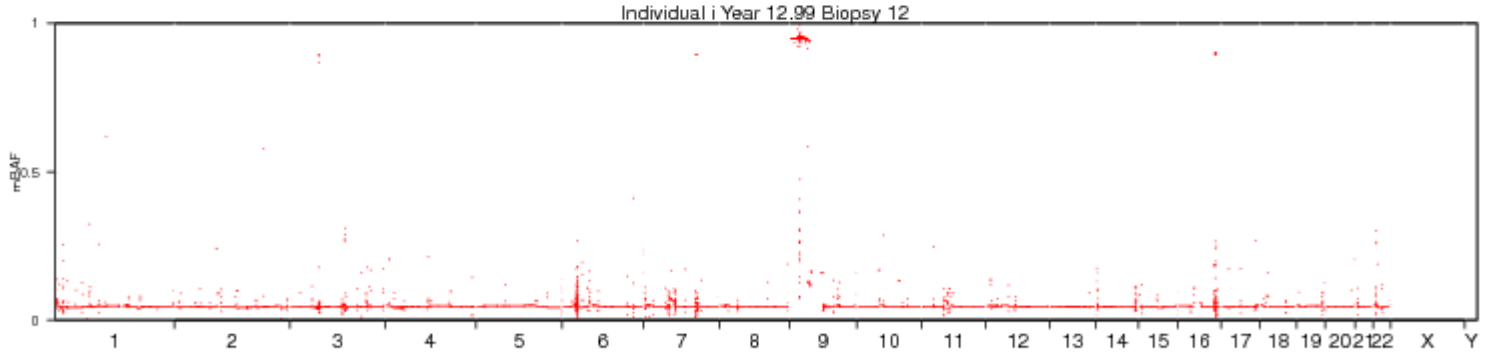

Individual i Year 12.99 Biopsy 12

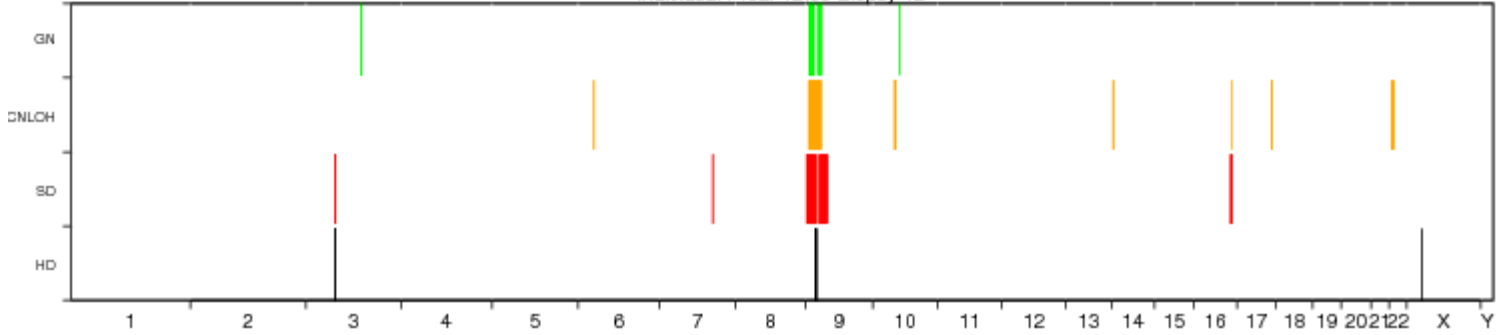

Individual i Year 12.99 Biopsy 13

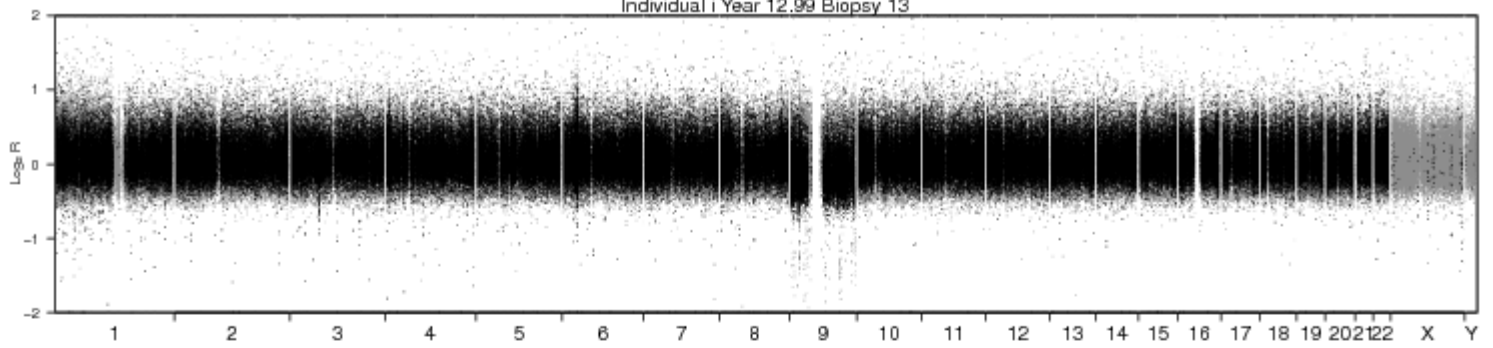

Individual i Year 12.99 Biopsy 13

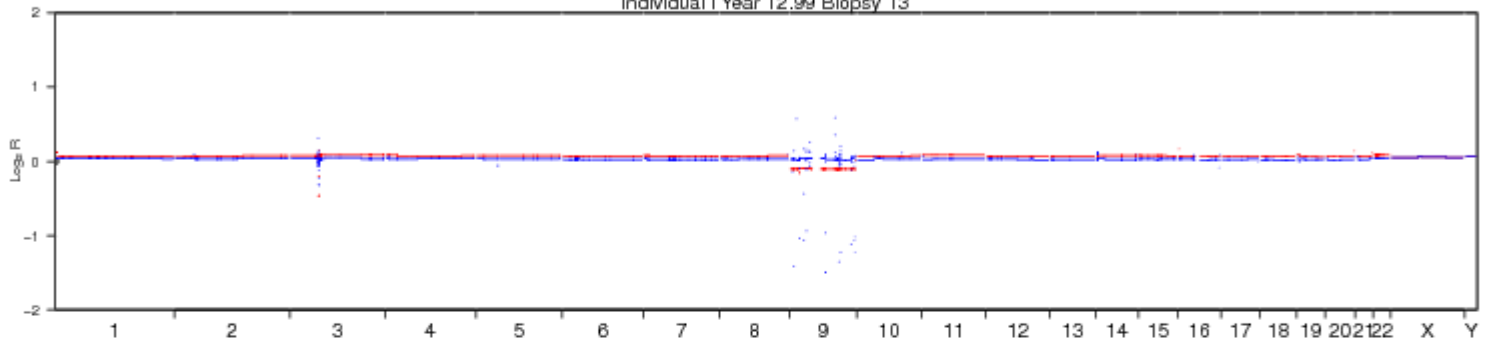

Individual i Year 12.99 Biopsy 13

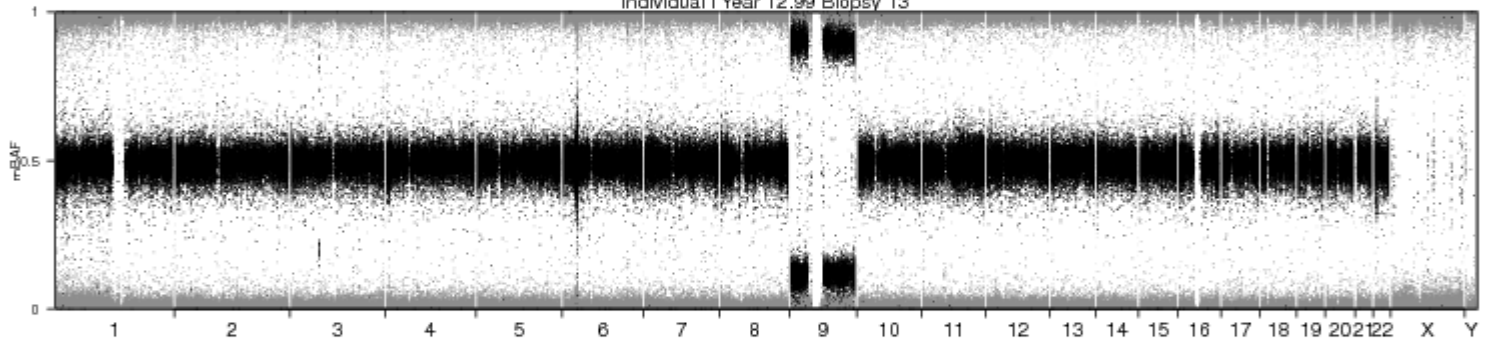

Individual i Year 12.99 Biopsy 13

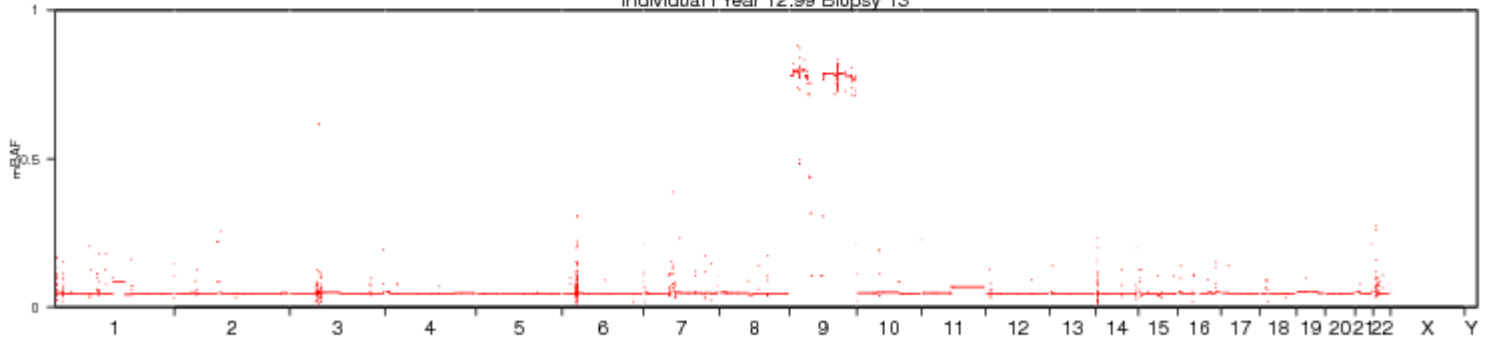

Individual i Year 12.99 Biopsy 13

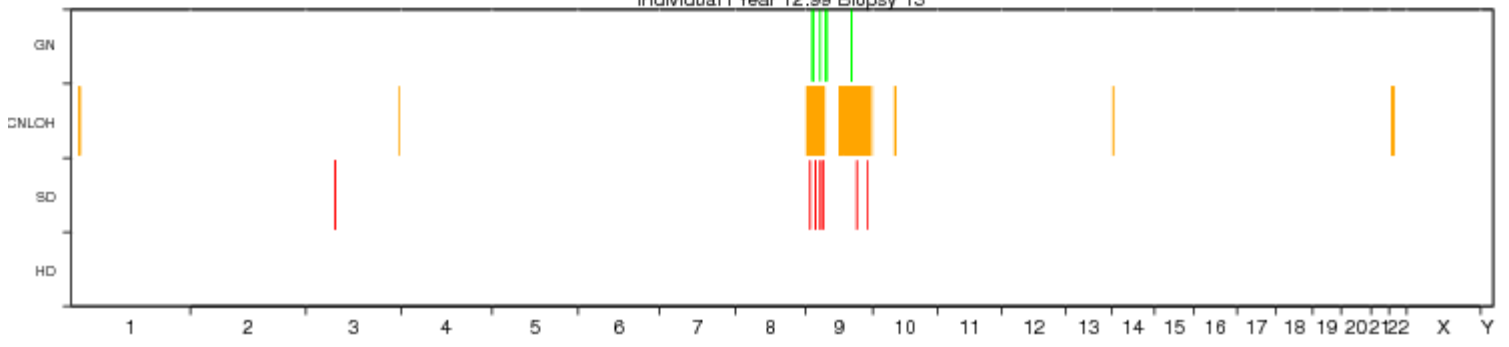

Individual i Year 0 Biopsy 1

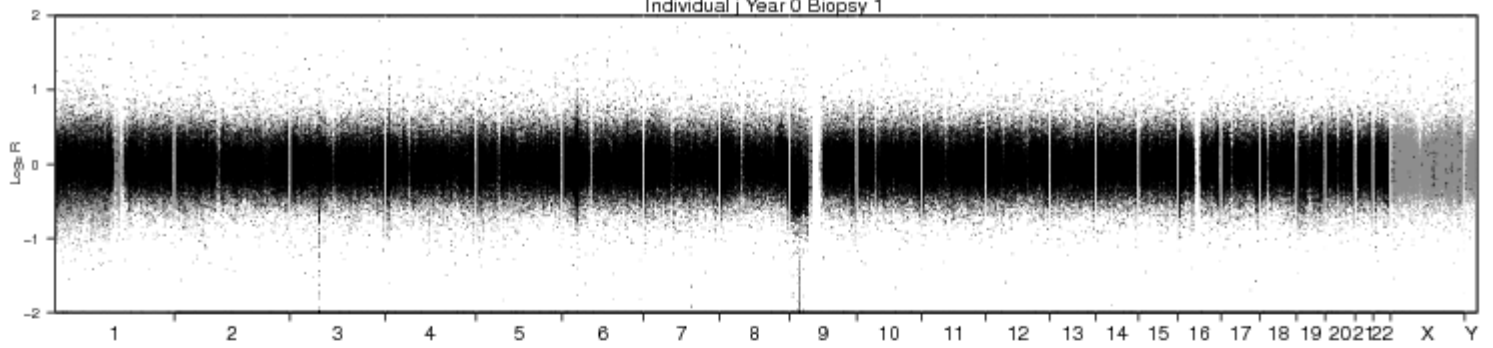

Individual i Year 0 Biopsy 1

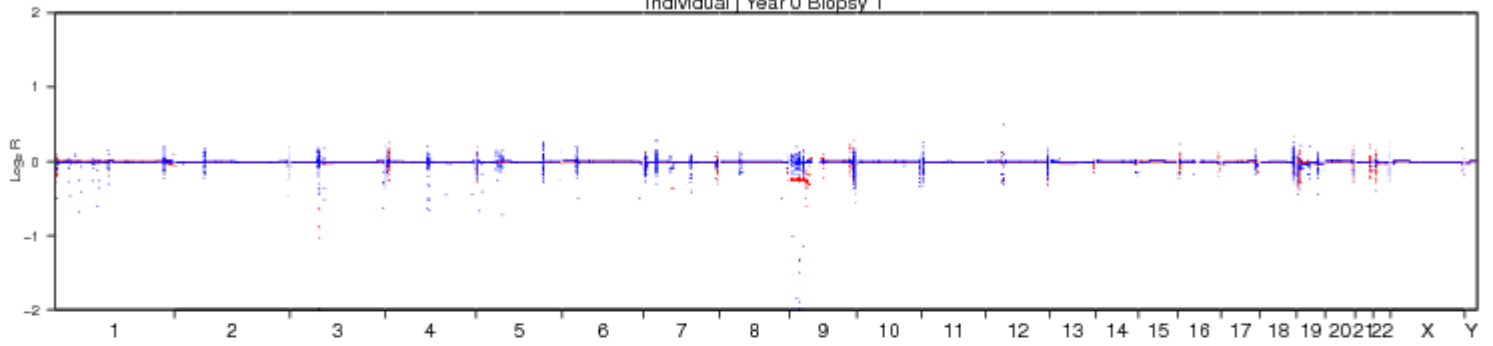

Individual i Year 0 Biopsy 1

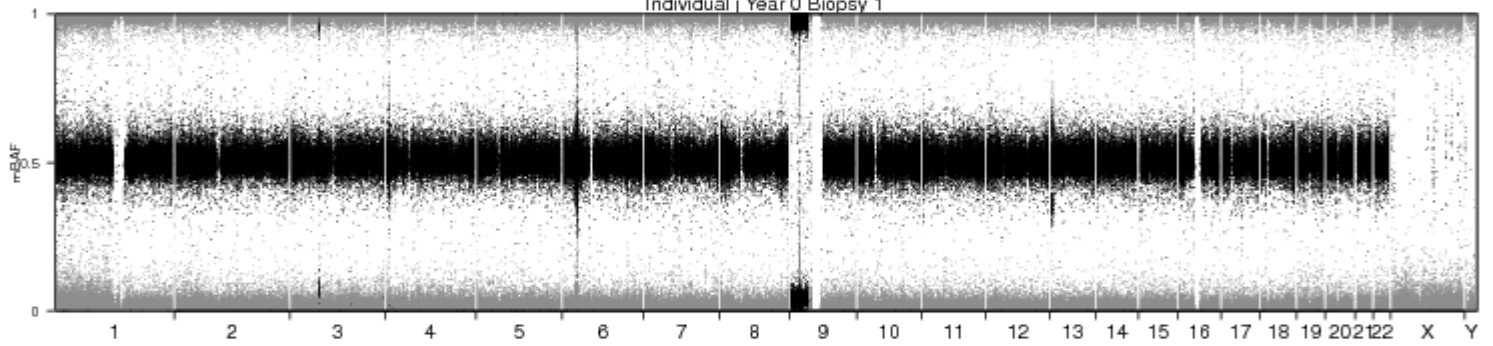

Individual i Year 0 Biopsy 1

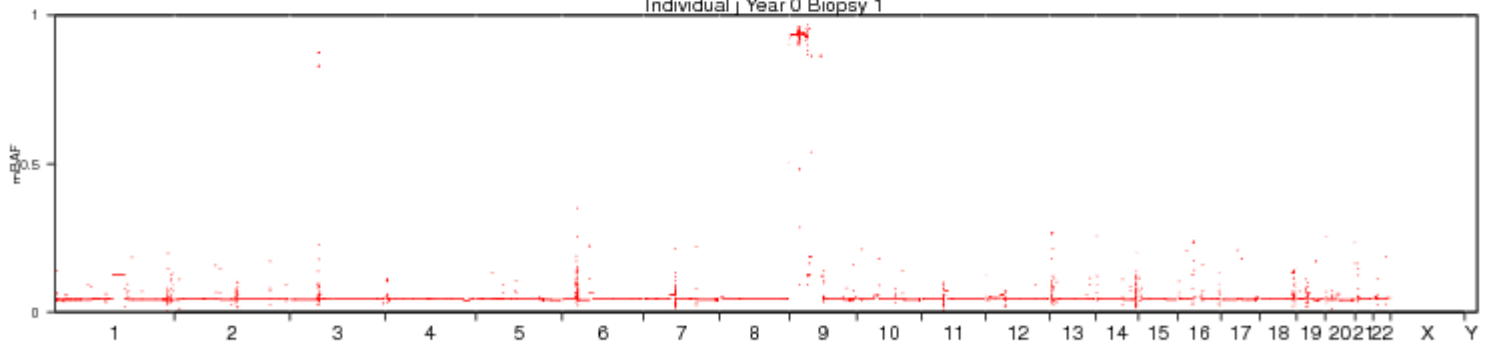

Individual i Year 0 Biopsy 1

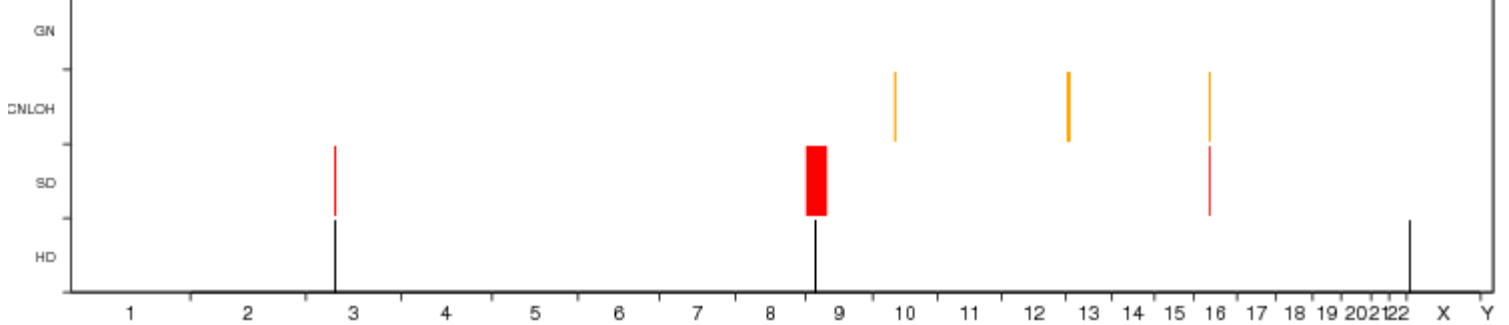

Individual i Year 0 Biopsy 2

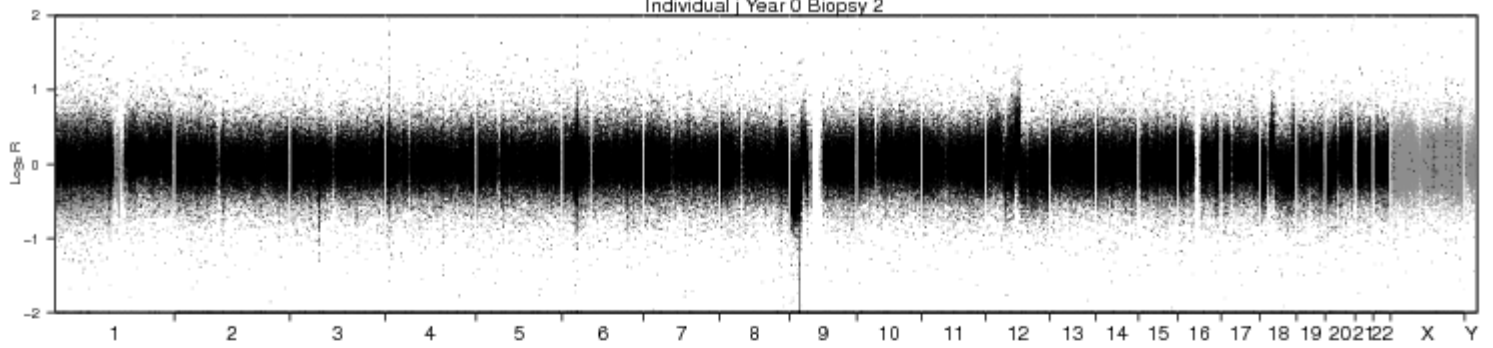

Individual i Year 0 Biopsy 2

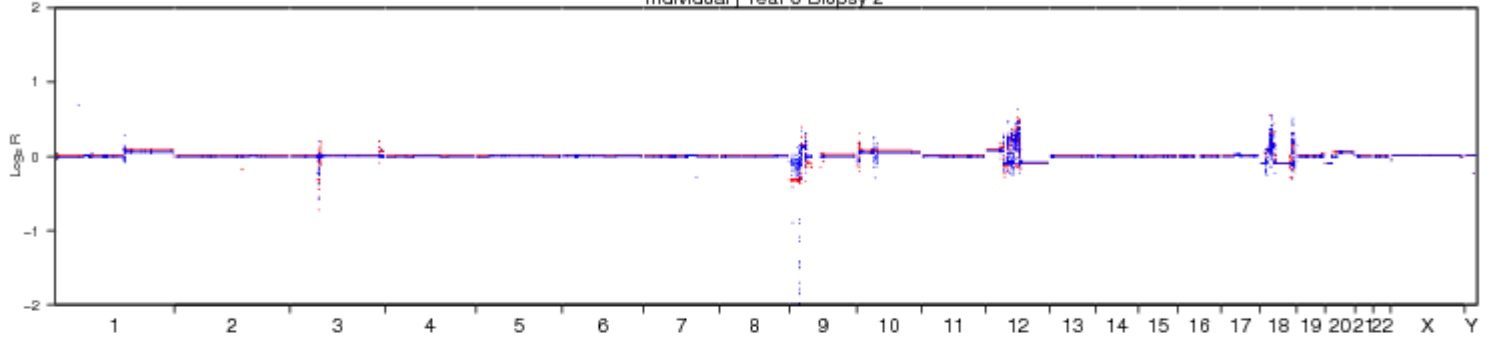

Individual i Year 0 Biopsy 2

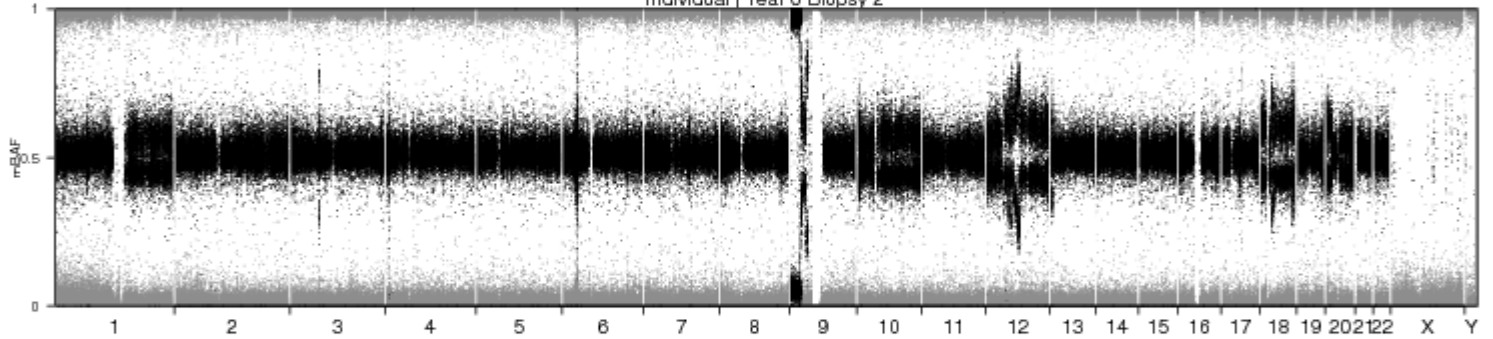

Individual i Year 0 Biopsy 2

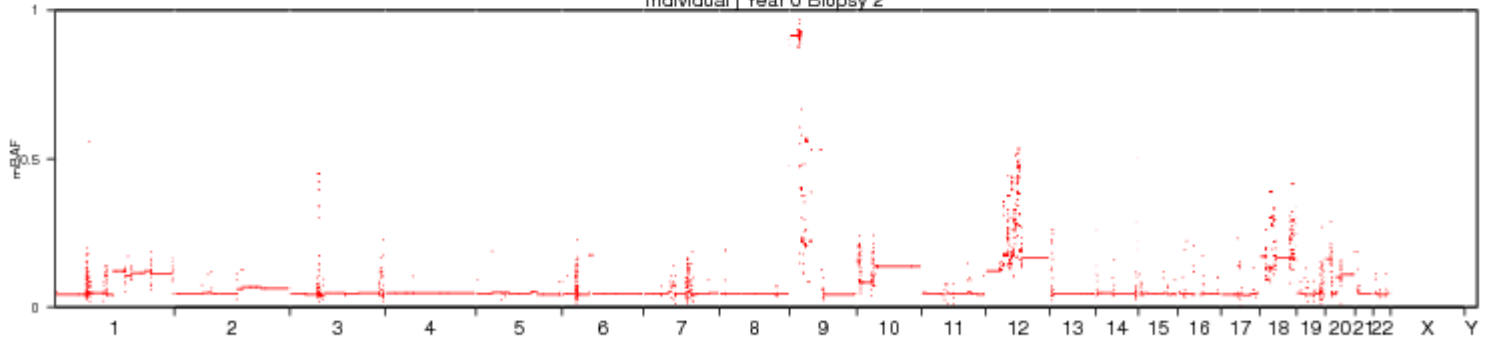

Individual i Year 0 Biopsy 2

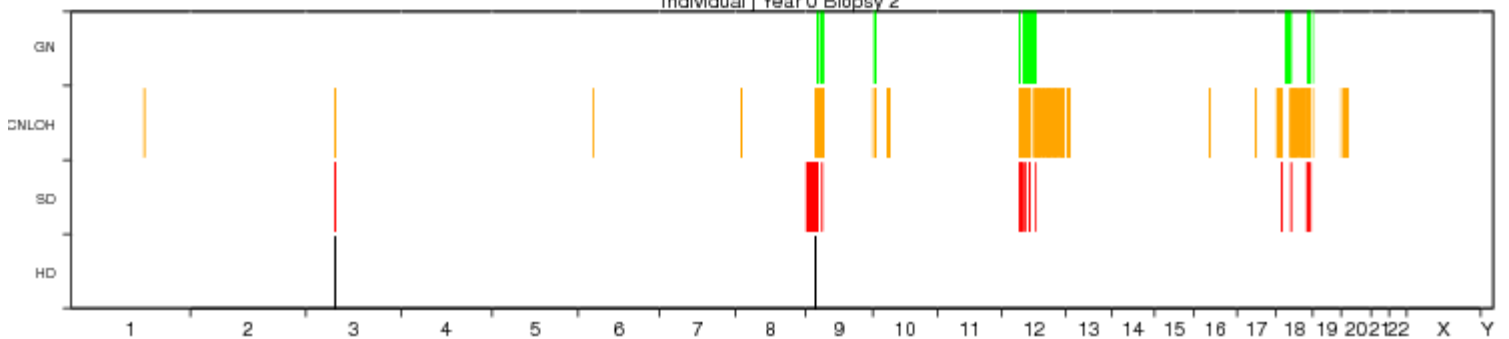



Individual | Year 6.86 Biopsy 3

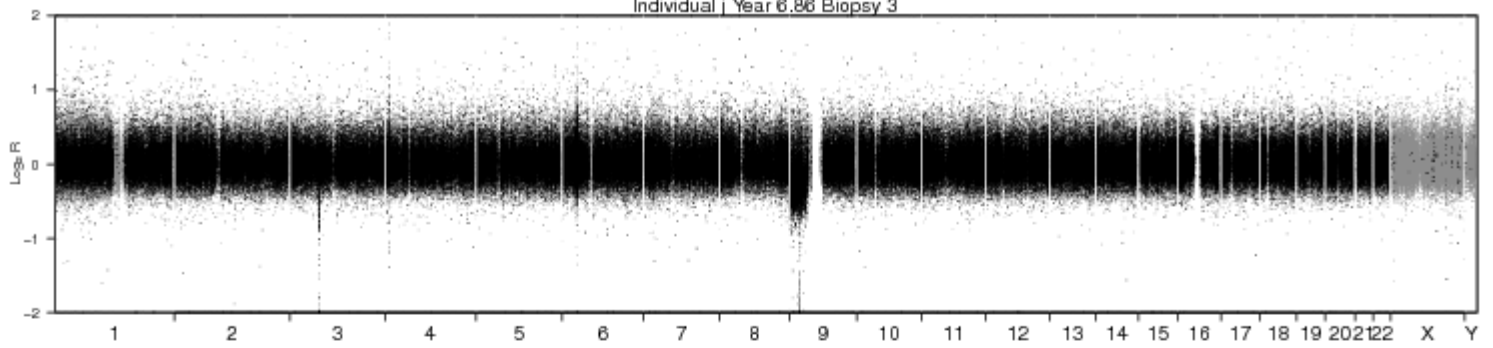

Individual | Year 6.86 Biopsy 3

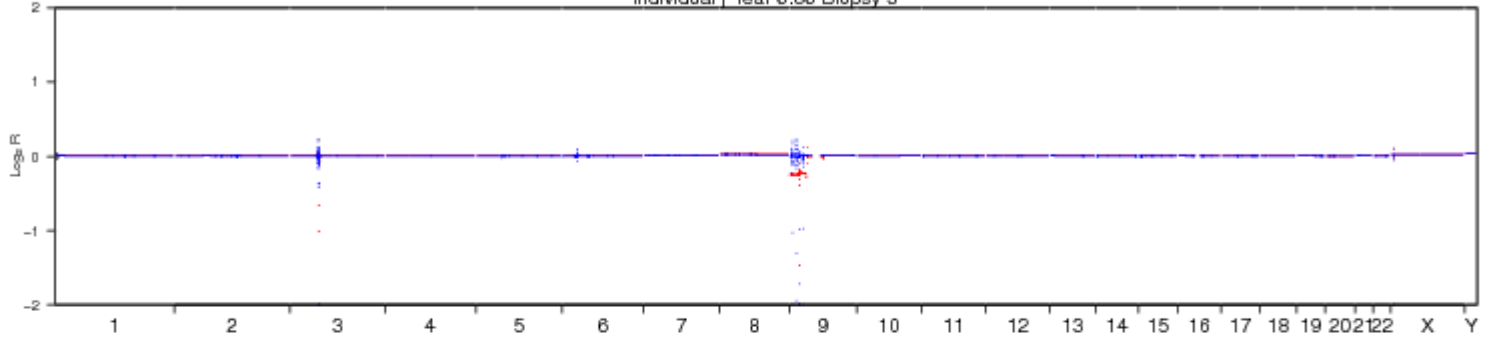

Individual | Year 6.86 Biopsy 3

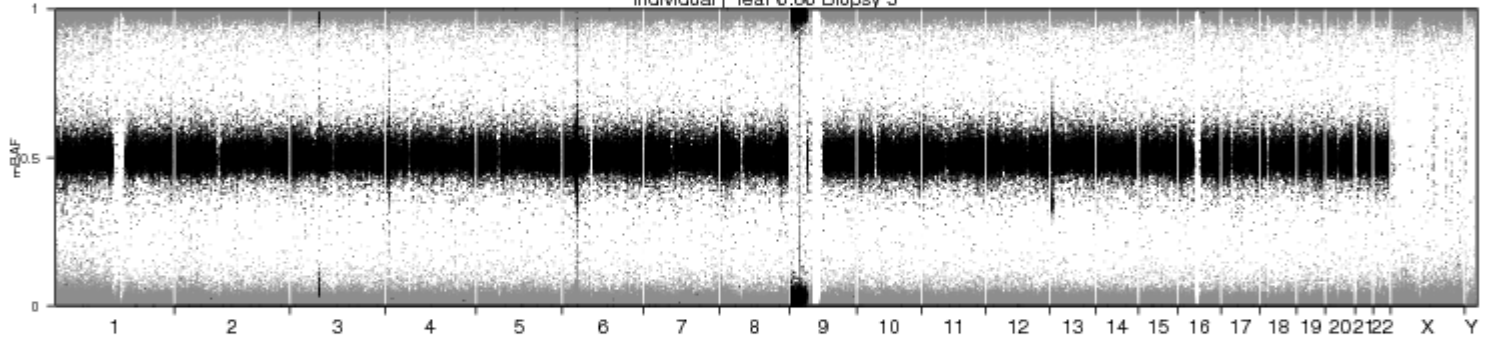

Individual | Year 6.86 Biopsy 3

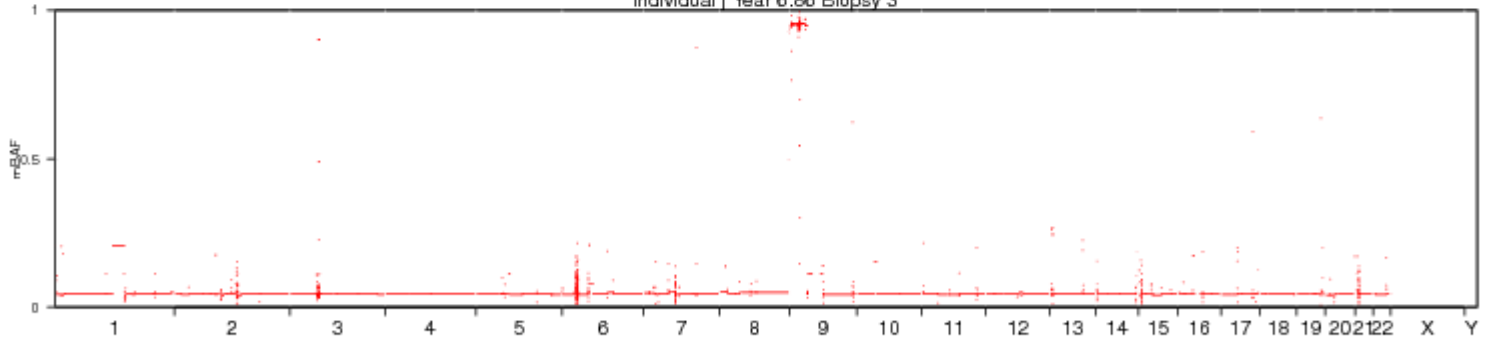

Individual | Year 6.86 Biopsy 3

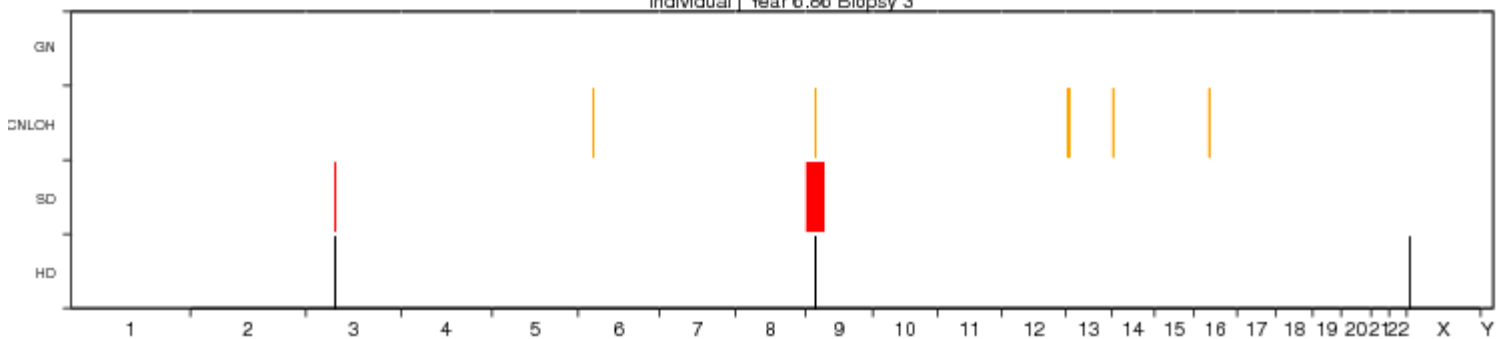

Individual | Year 6.86 Biopsy 4

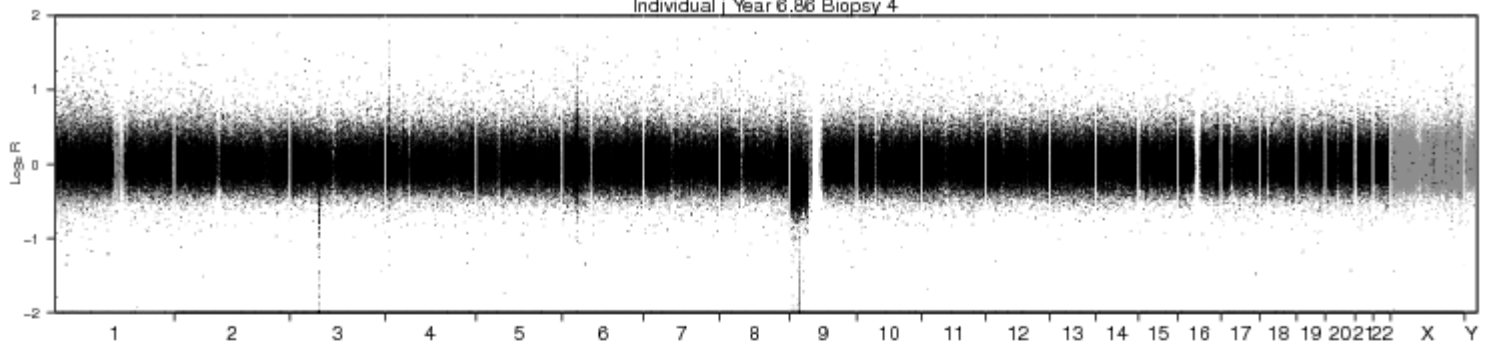

Individual | Year 6.86 Biopsy 4

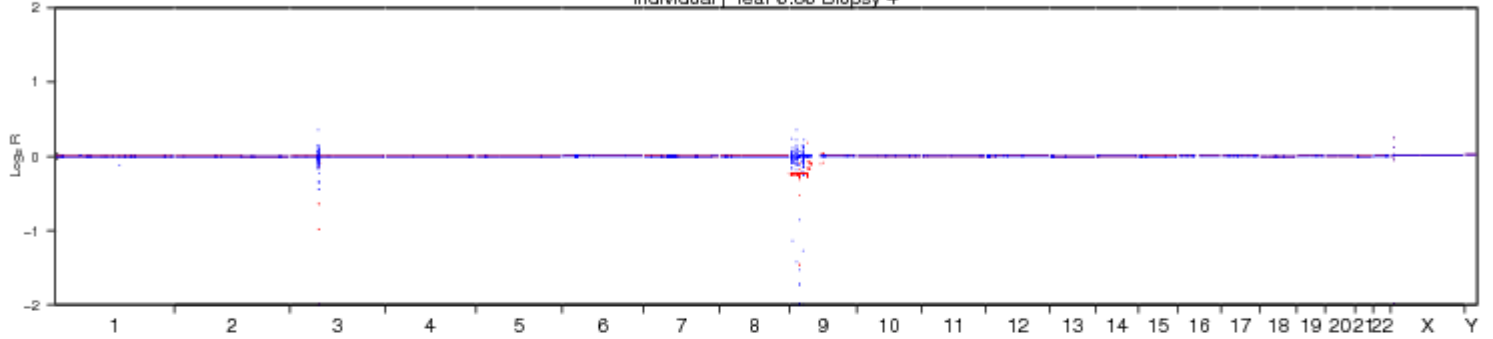

Individual | Year 6.86 Biopsy 4

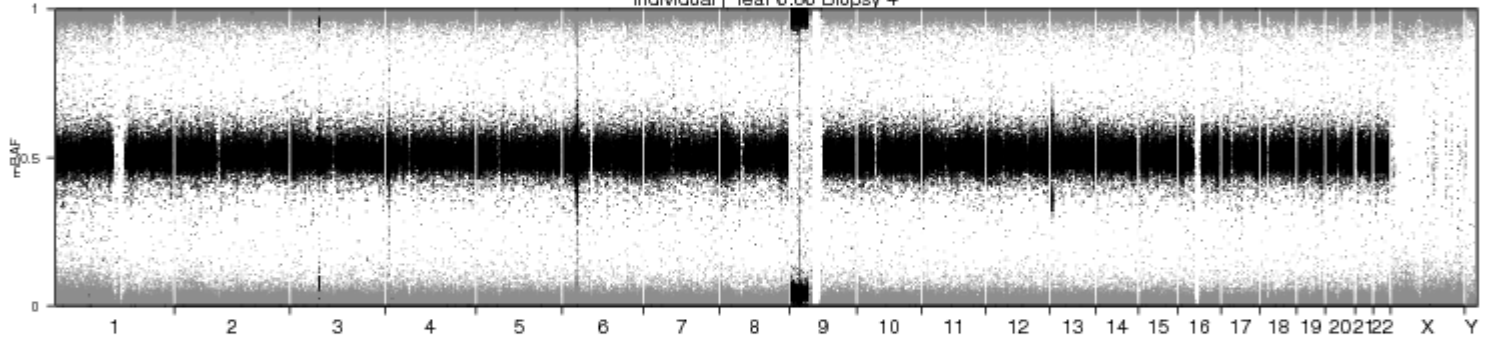

Individual | Year 6.86 Biopsy 4

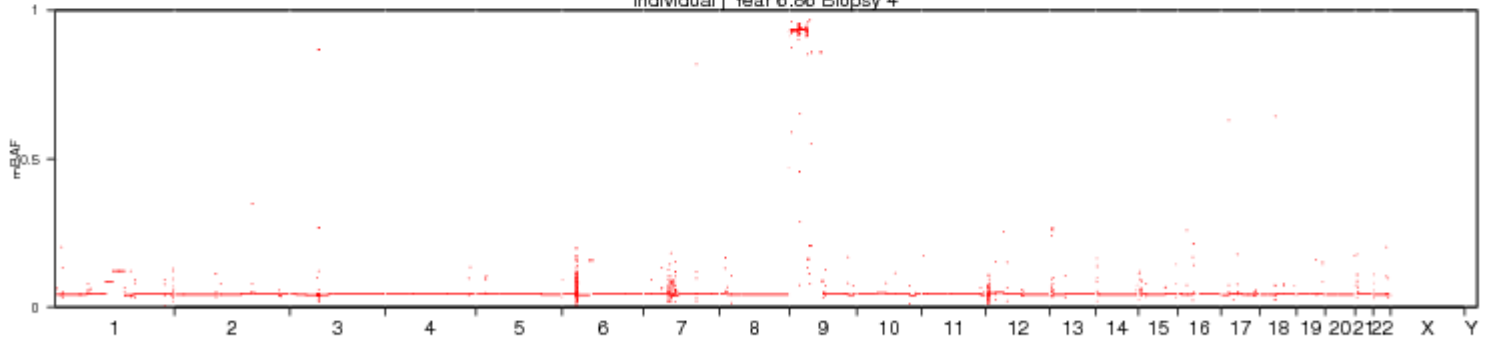

Individual | Year 6.86 Biopsy 4

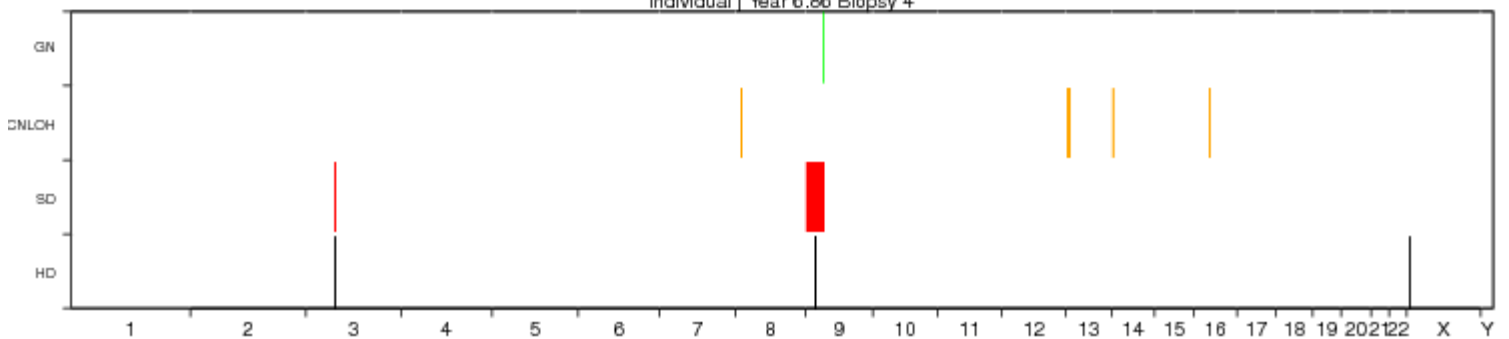

Individual | Year 6.86 Biopsy 5

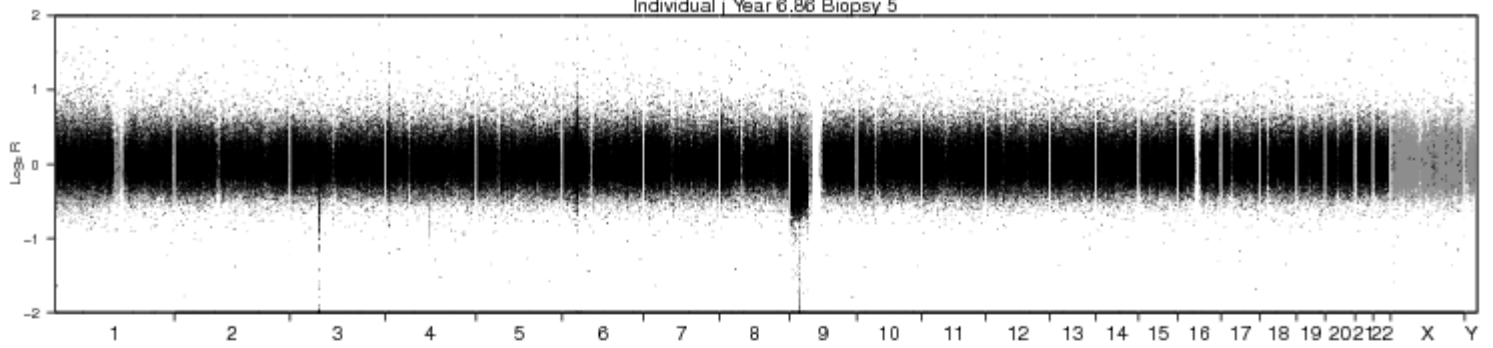

Individual | Year 6.86 Biopsy 5

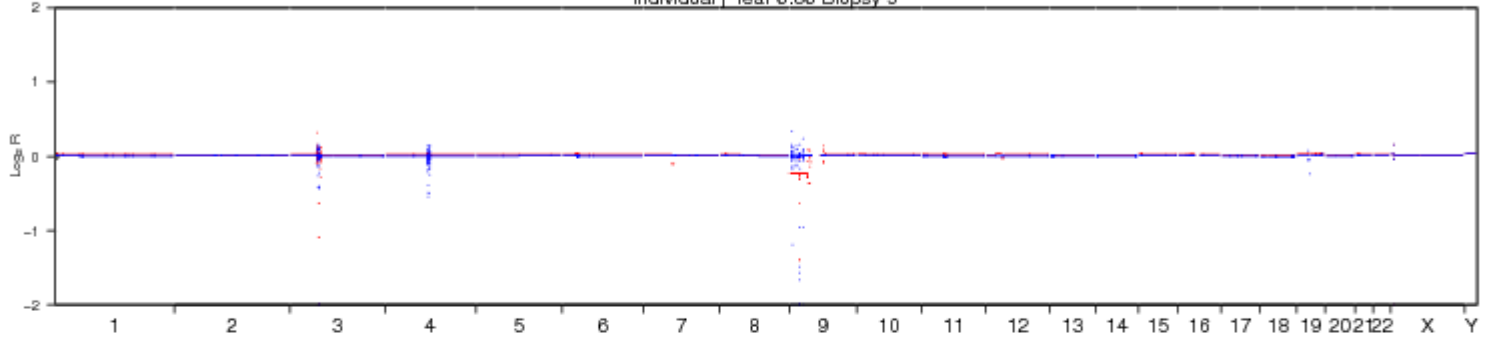

Individual | Year 6.86 Biopsy 5

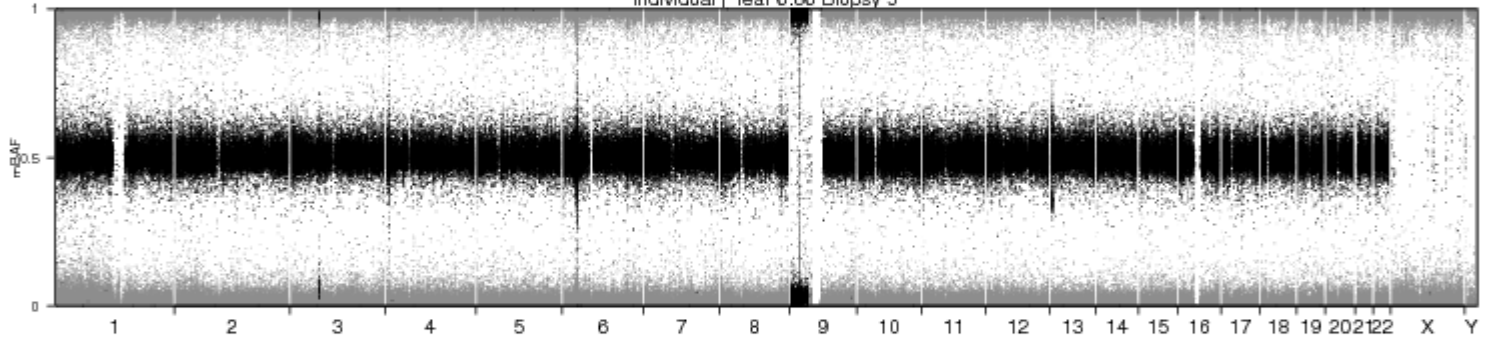

Individual | Year 6.86 Biopsy 5

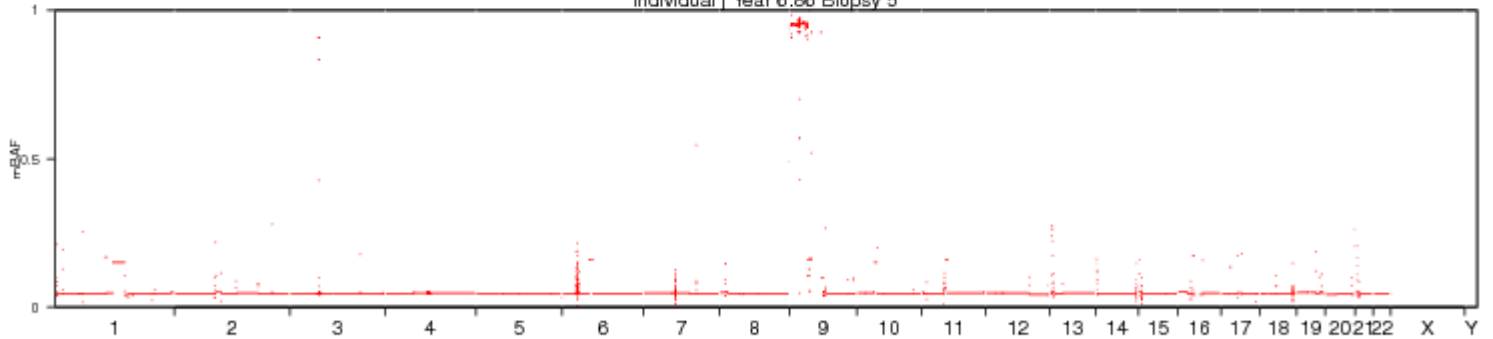

Individual | Year 6.86 Biopsy 5

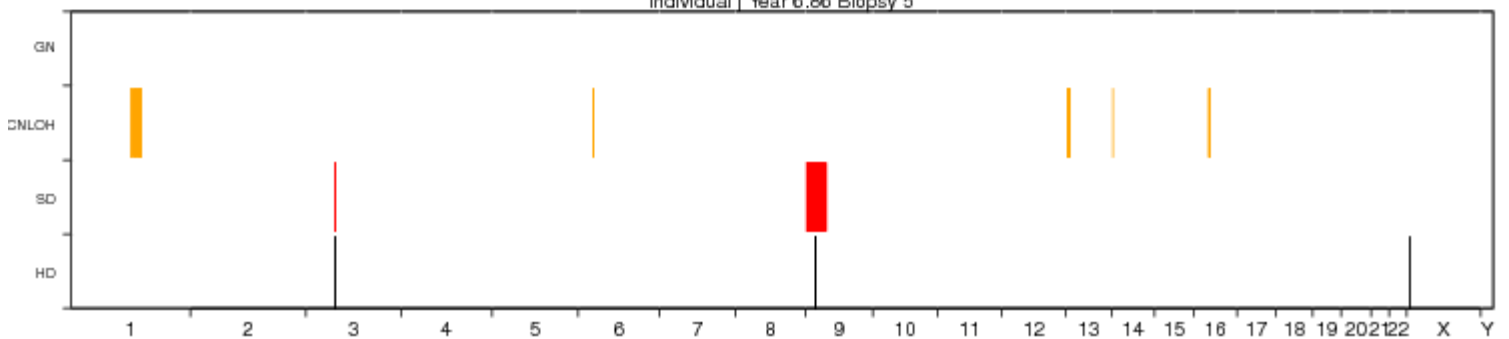

Individual | Year 8.52 Biopsy 6

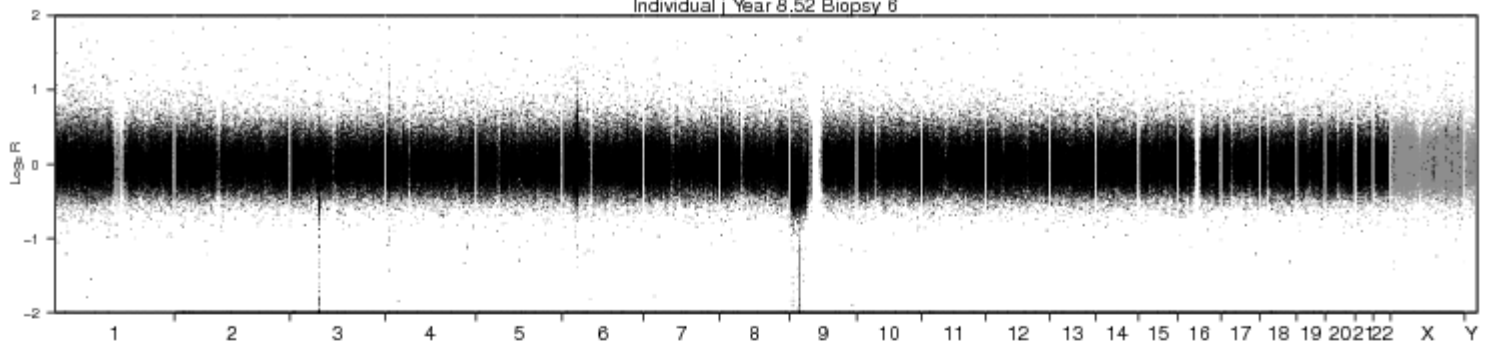

Individual | Year 8.52 Biopsy 6

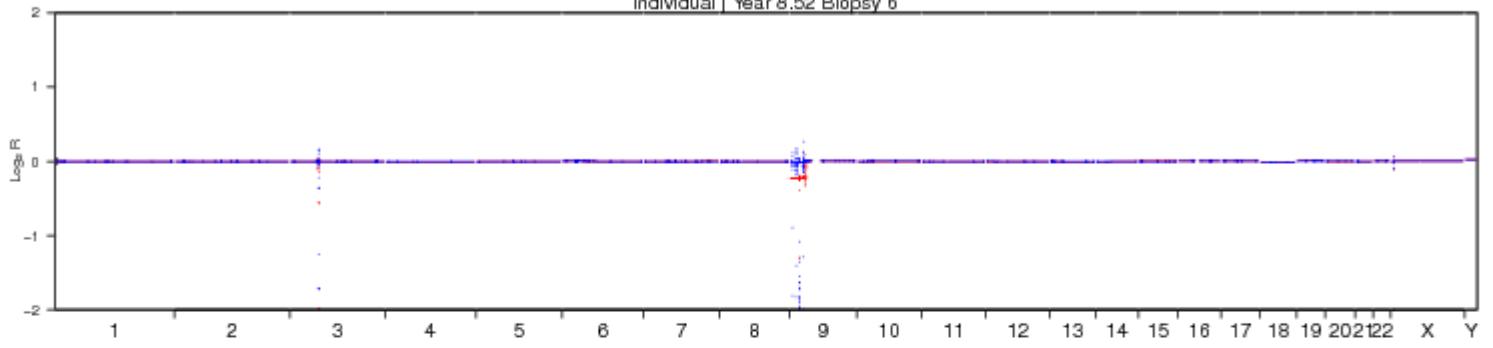

Individual | Year 8.52 Biopsy 6

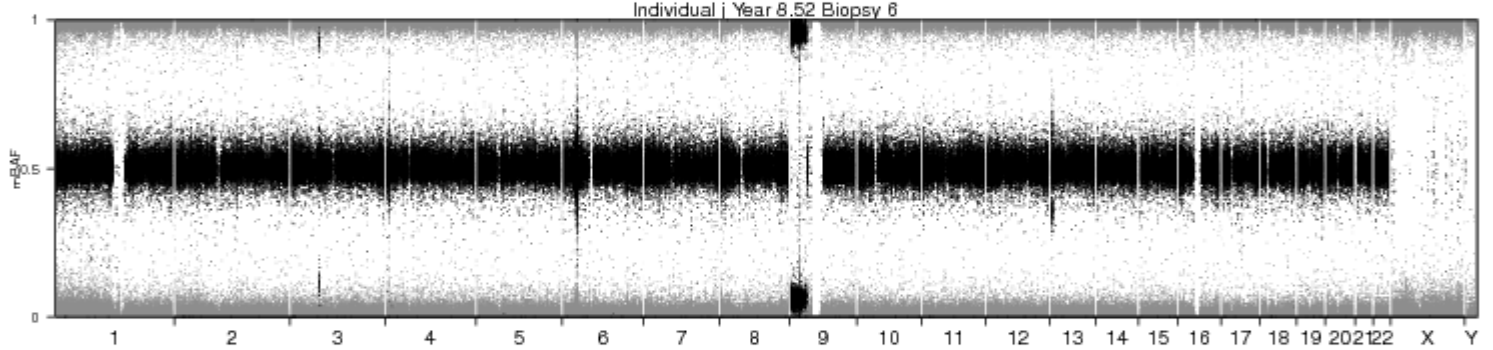

Individual | Year 8.52 Biopsy 6

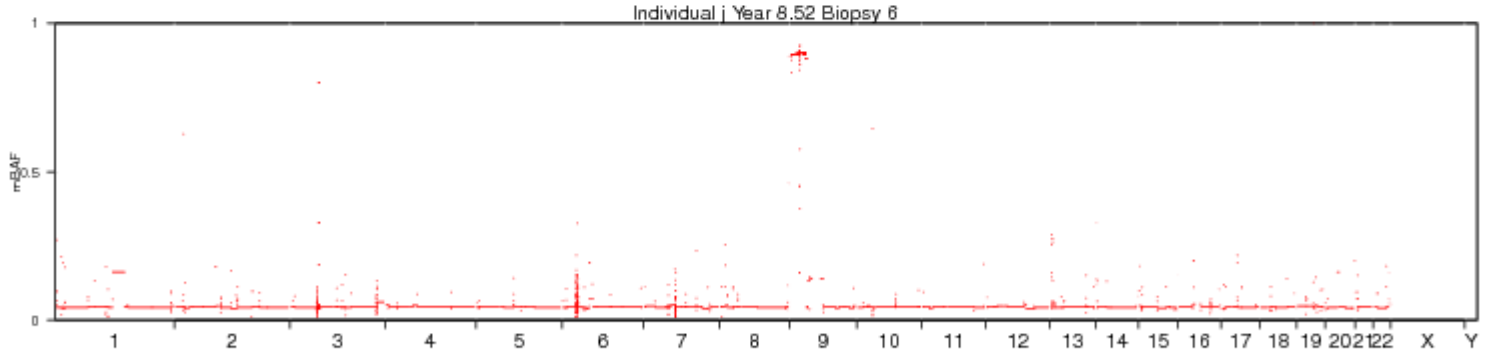

Individual | Year 8.52 Biopsy 6

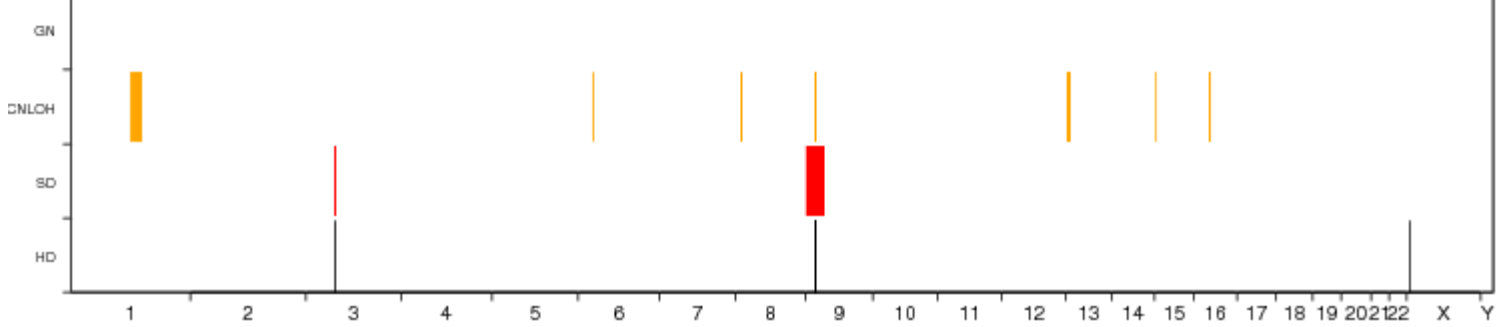



Individual | Year 8.52 Biopsy 7

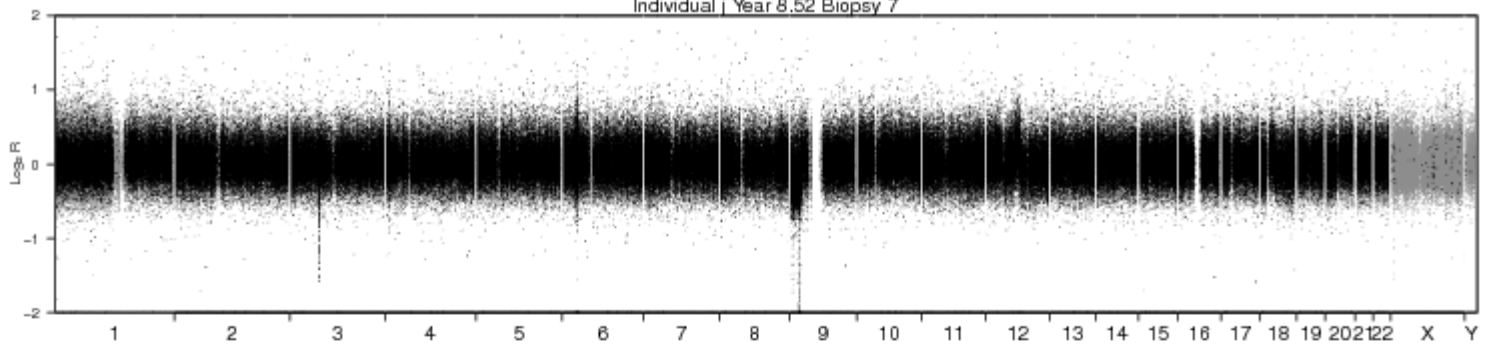

Individual | Year 8.52 Biopsy 7

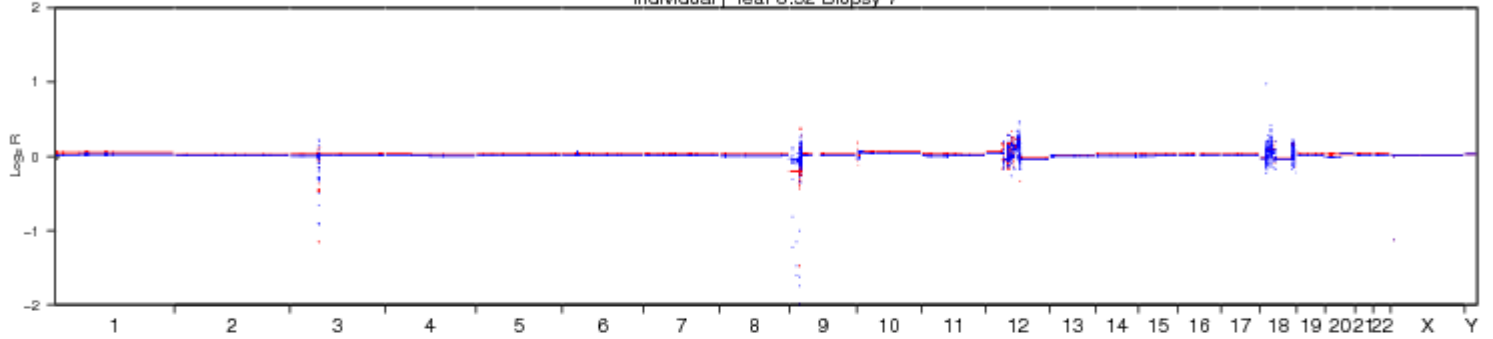

Individual | Year 8.52 Biopsy 7

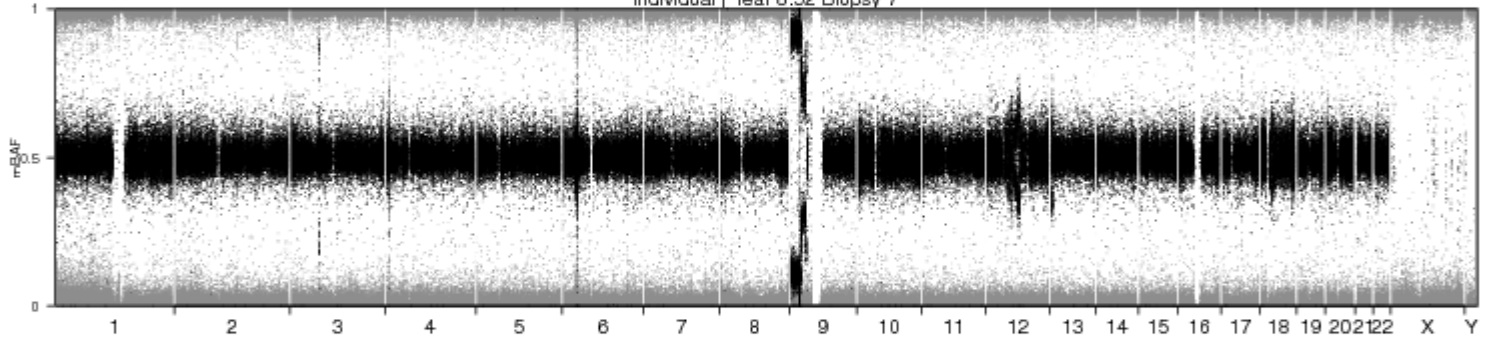

Individual | Year 8.52 Biopsy 7

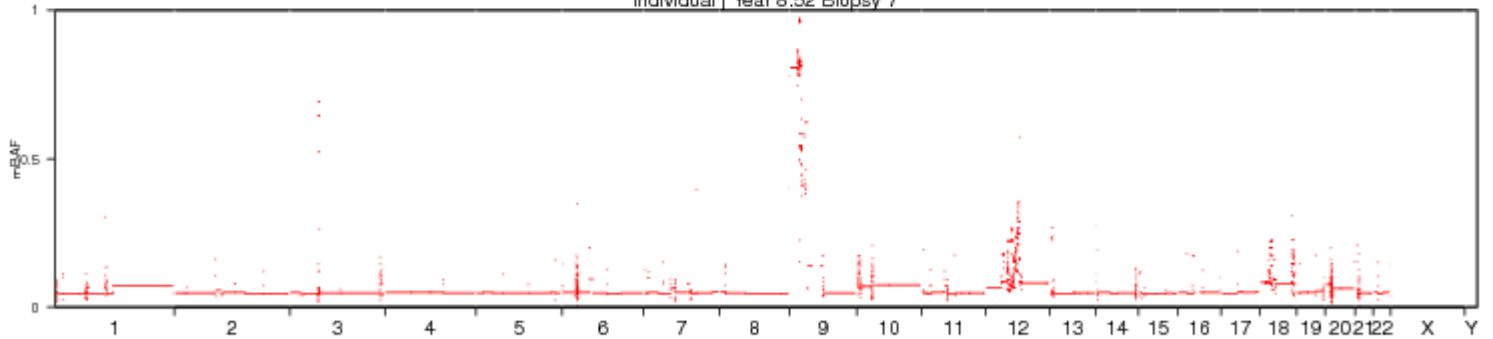

Individual | Year 8.52 Biopsy 7

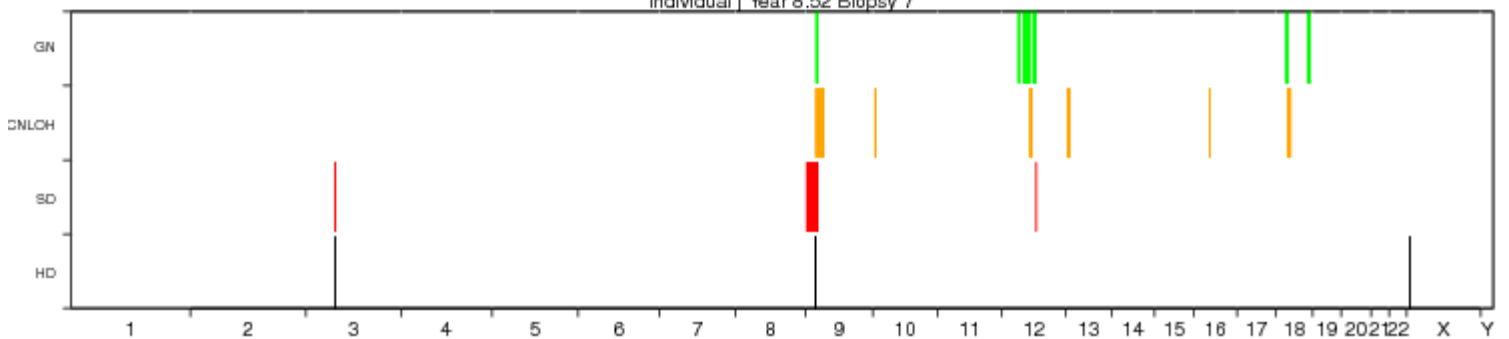

Individual | Year 8.52 Biopsy 8

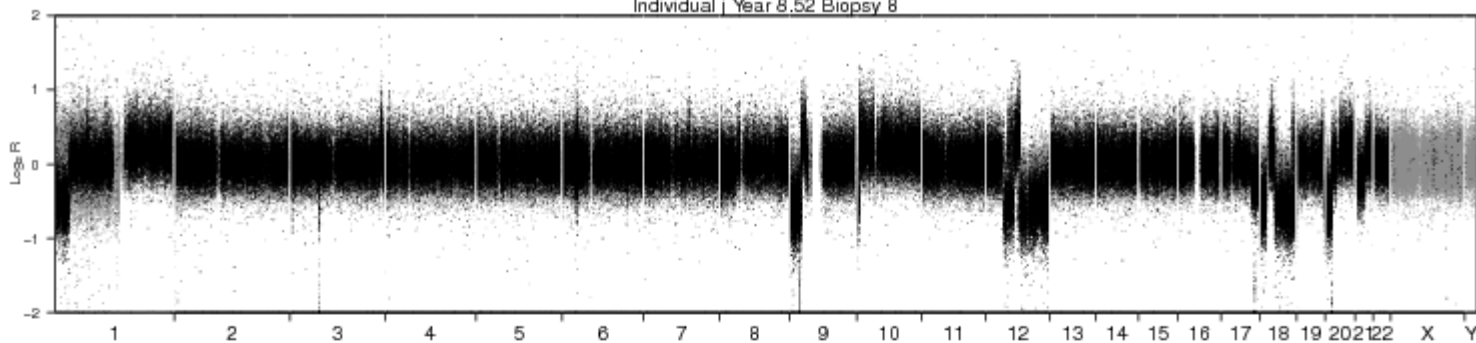

Individual | Year 8.52 Biopsy 8

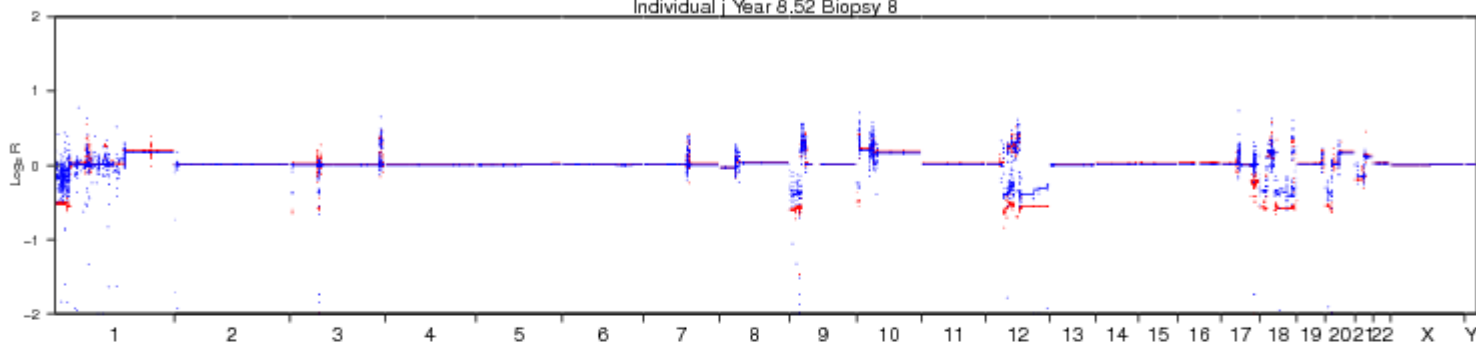

Individual | Year 8.52 Biopsy 8

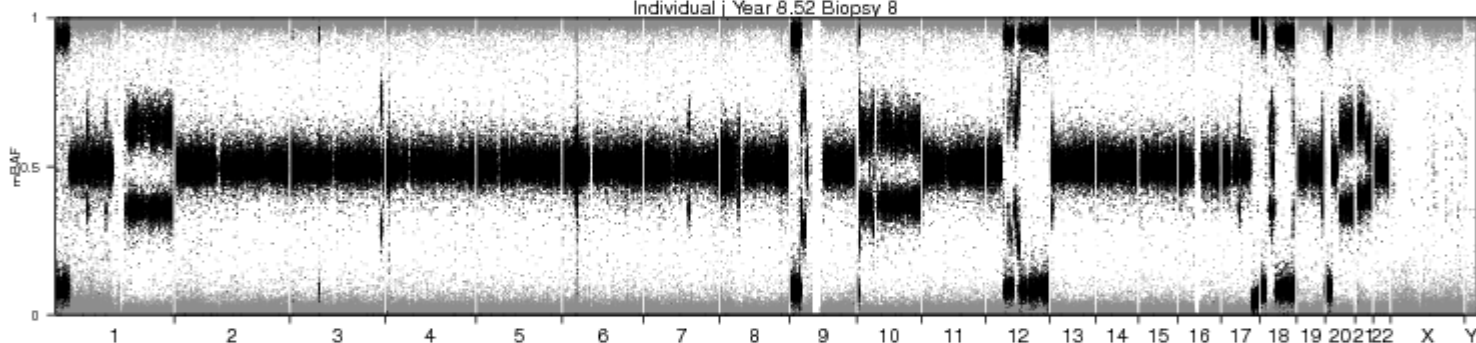

Individual | Year 8.52 Biopsy 8

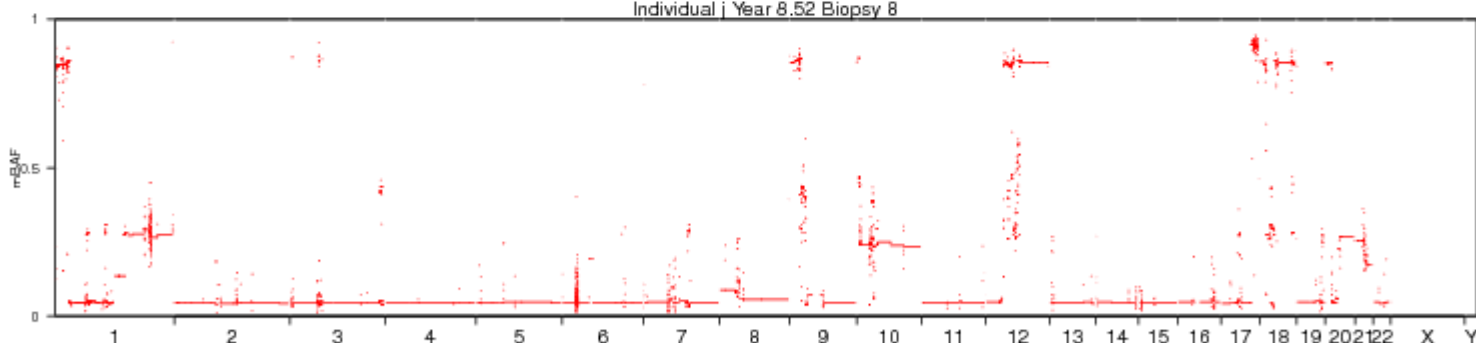

Individual | Year 8.52 Biopsy 8

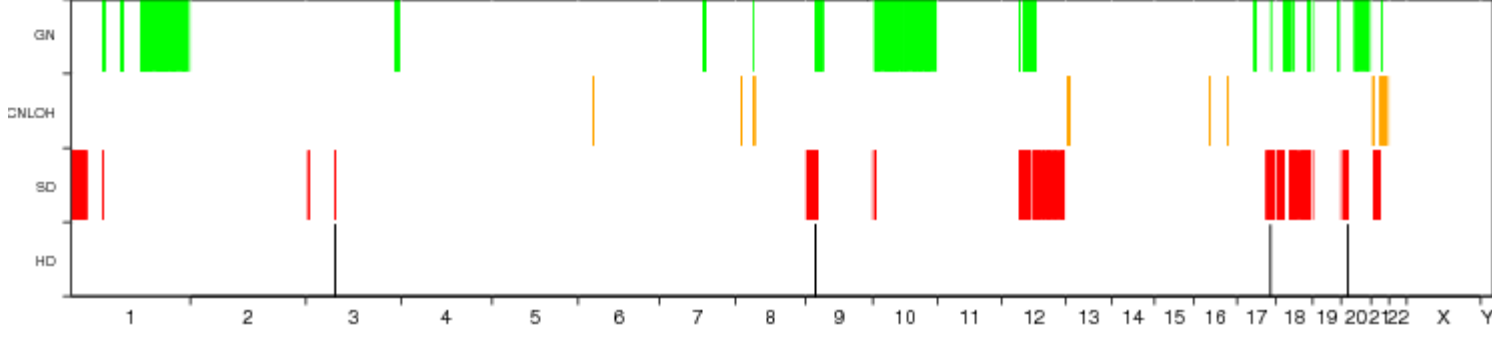

Individual j Year 10.99 Biopsy 9

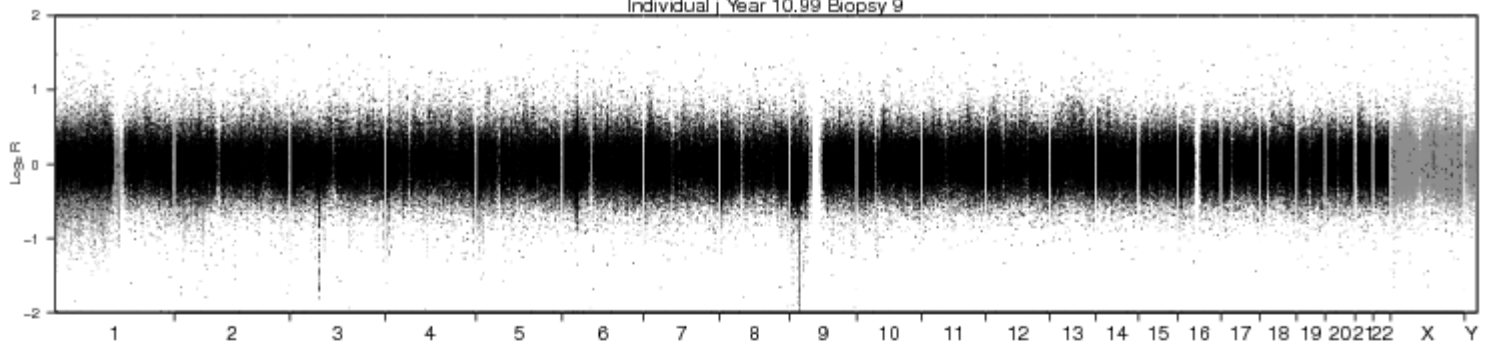

Individual j Year 10.99 Biopsy 9

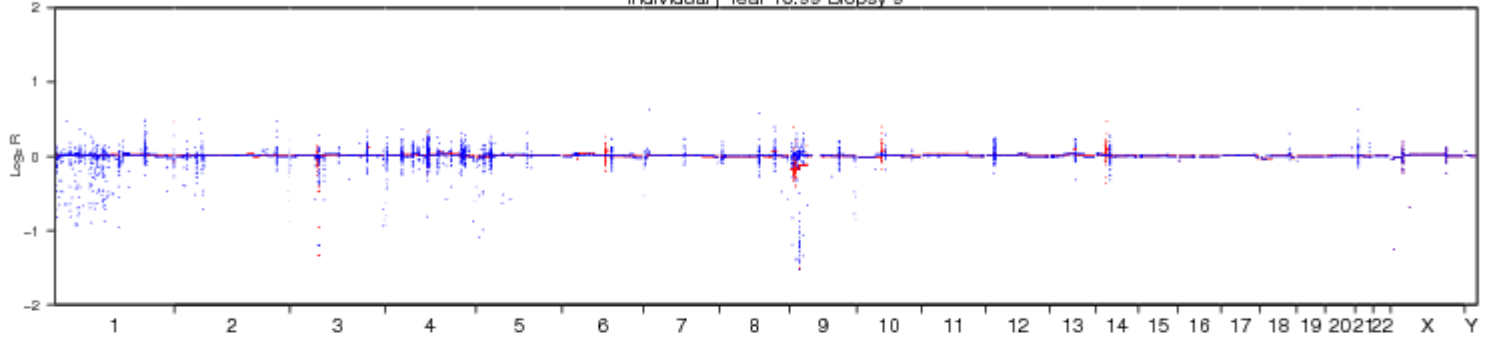

Individual j Year 10.99 Biopsy 9

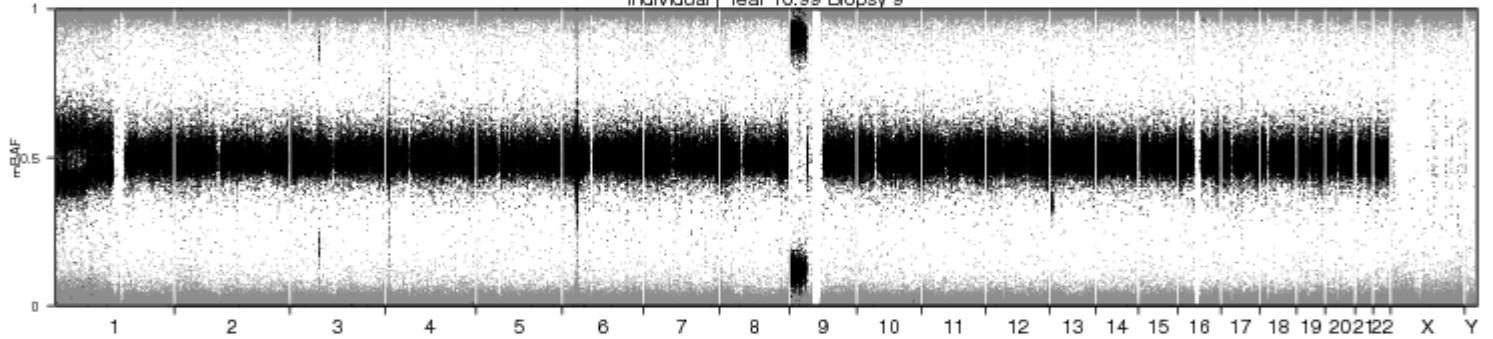

Individual j Year 10.99 Biopsy 9

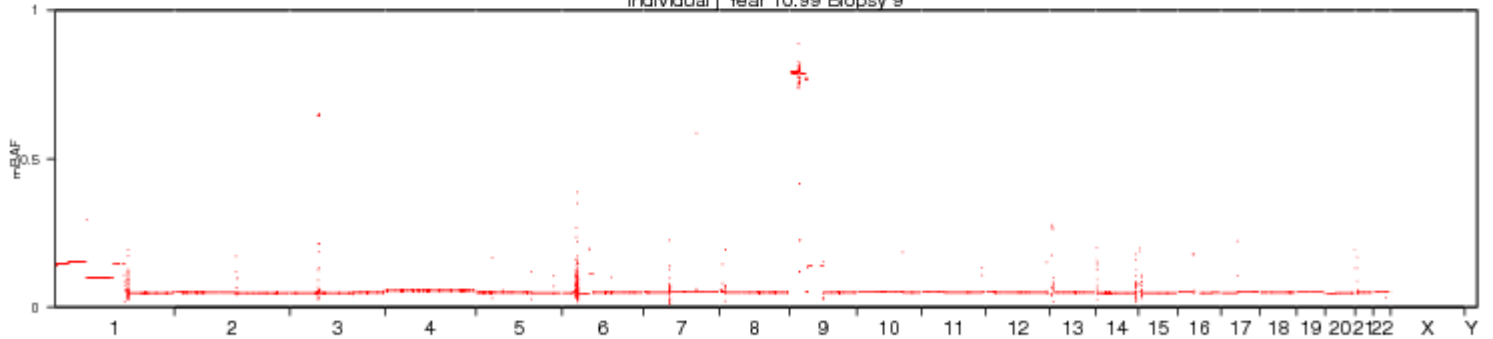

Individual j Year 10.99 Biopsy 9

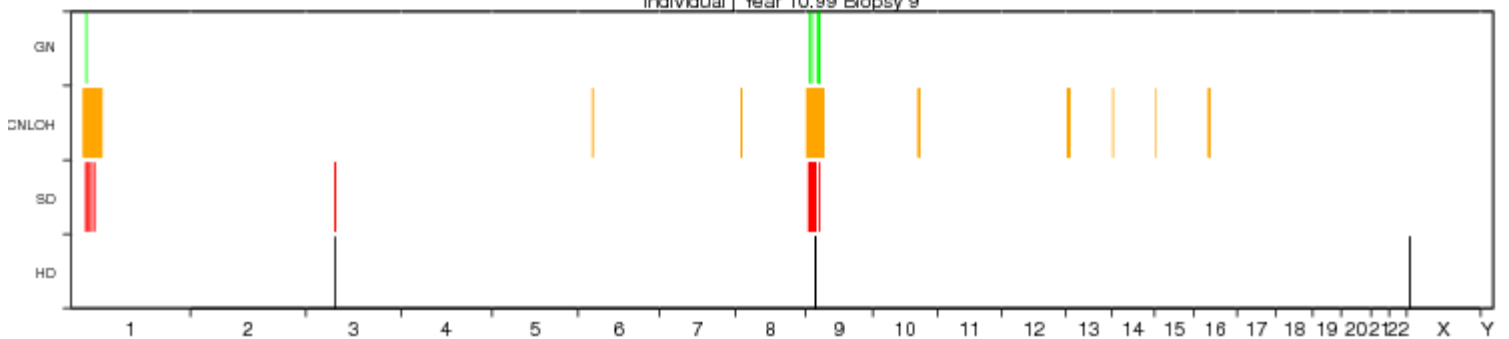

Individual j Year 10.99 Biopsy 10

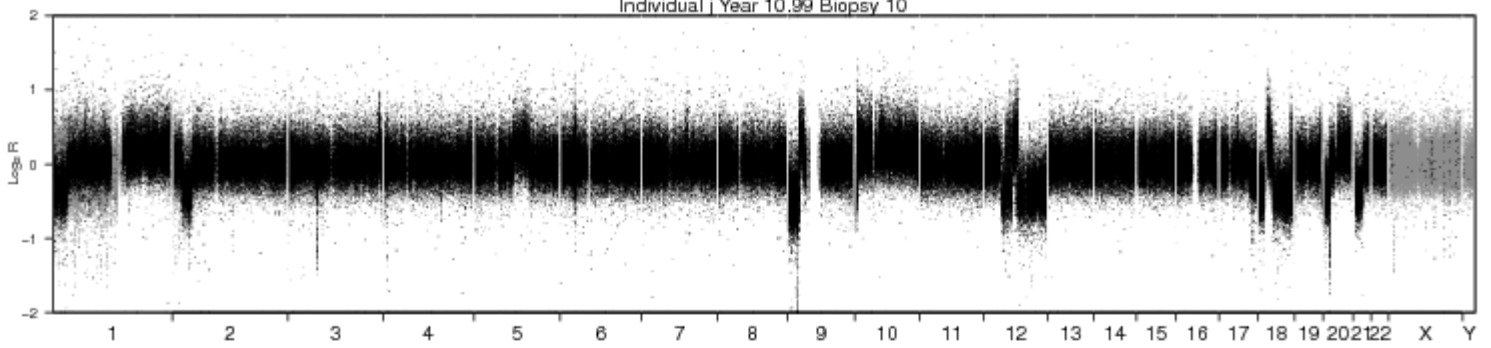

Individual j Year 10.99 Biopsy 10

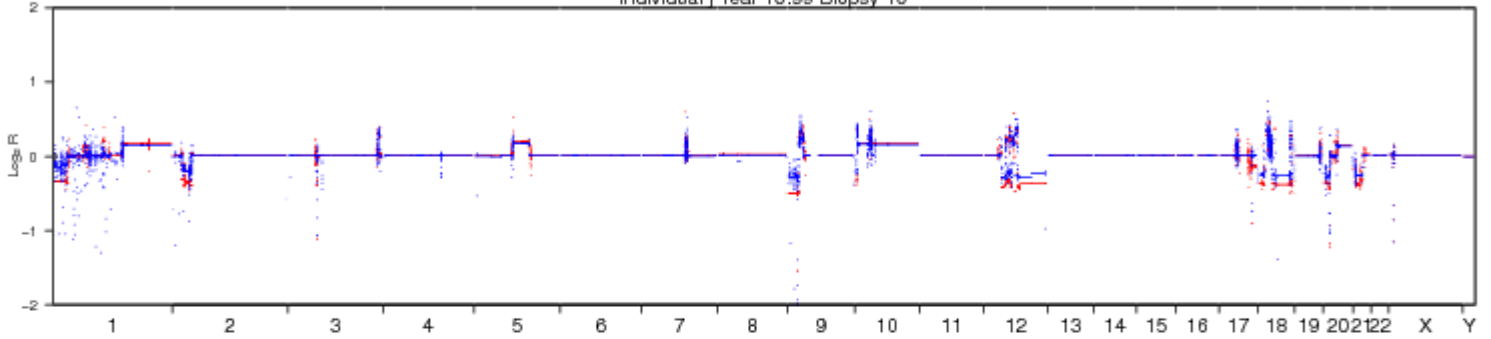

Individual j Year 10.99 Biopsy 10

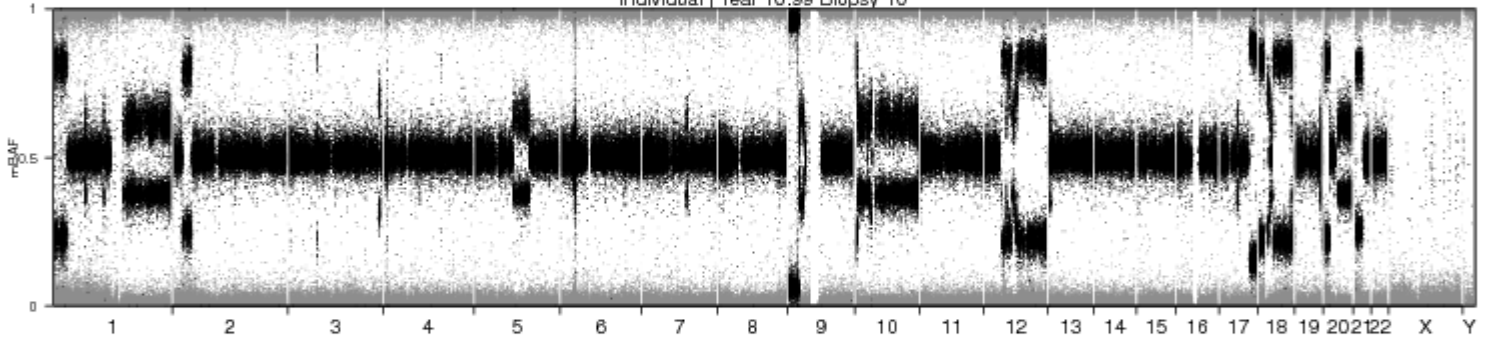

Individual j Year 10.99 Biopsy 10

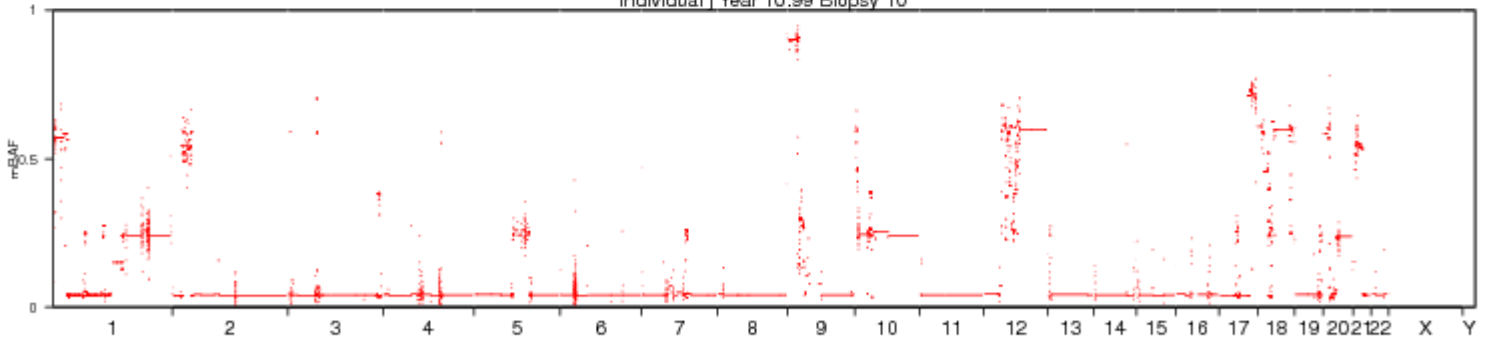

Individual j Year 10.99 Biopsy 10

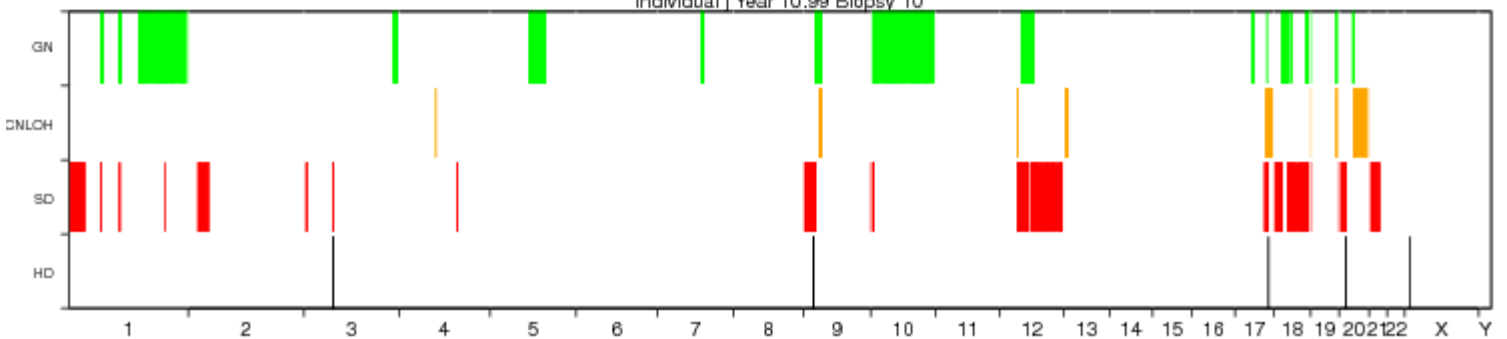



Individual j Year 10.99 Biopsy 11

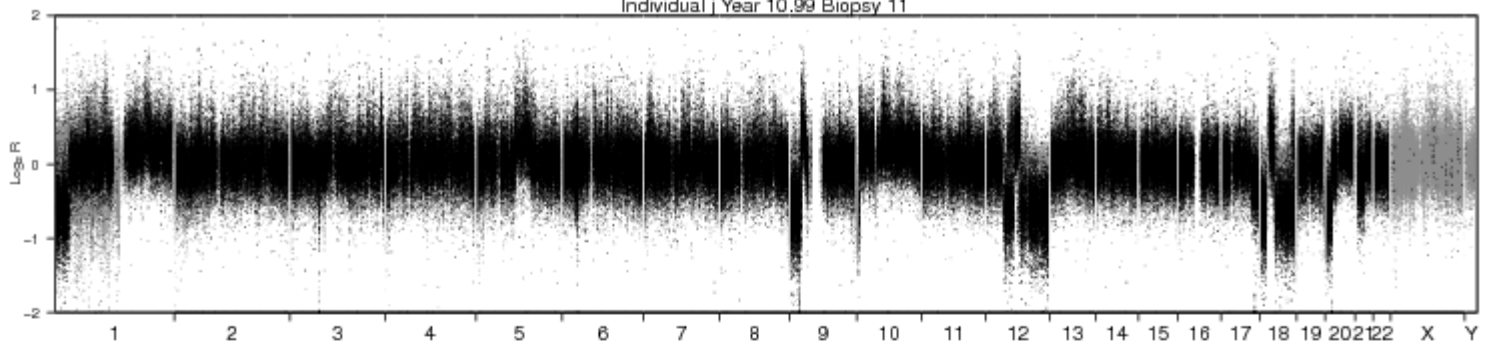

Individual j Year 10.99 Biopsy 11

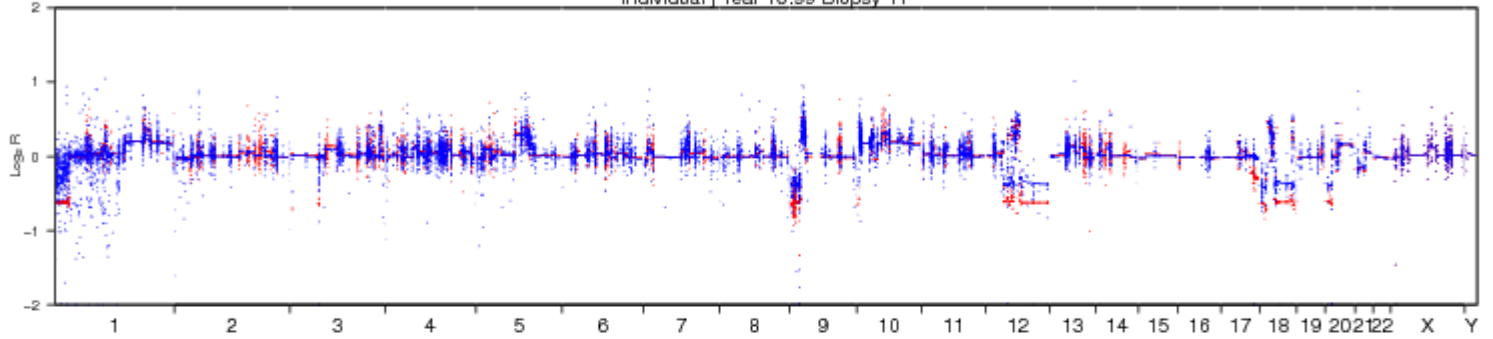

Individual j Year 10.99 Biopsy 11

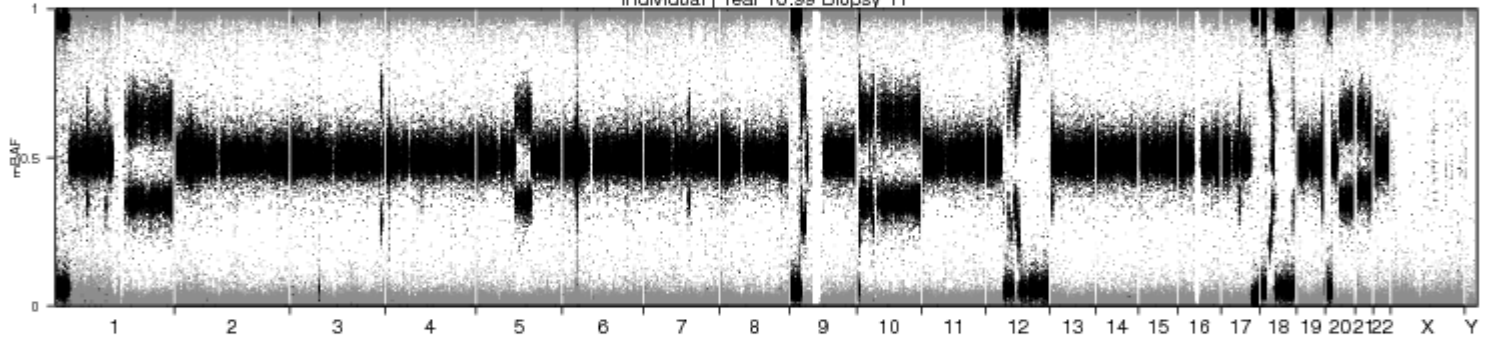

Individual j Year 10.99 Biopsy 11

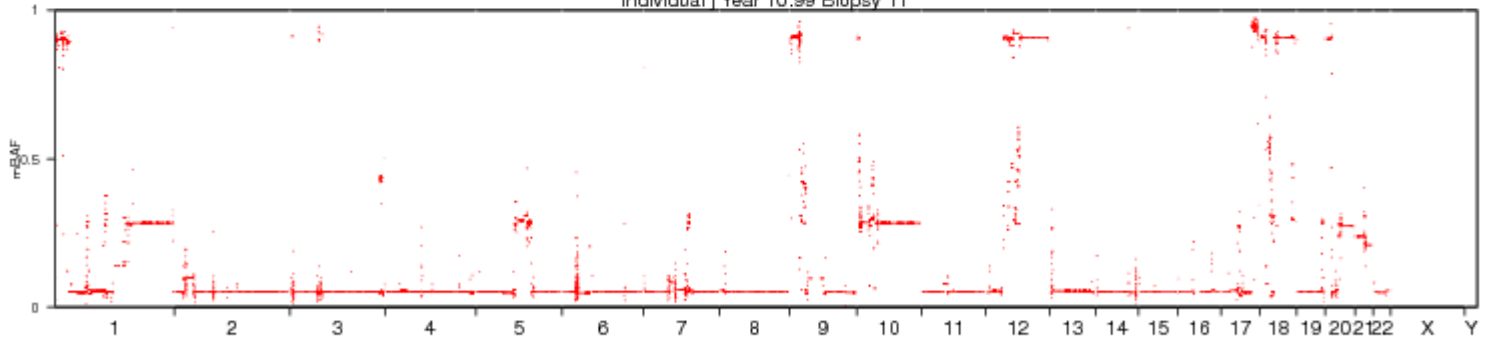

Individual j Year 10.99 Biopsy 11

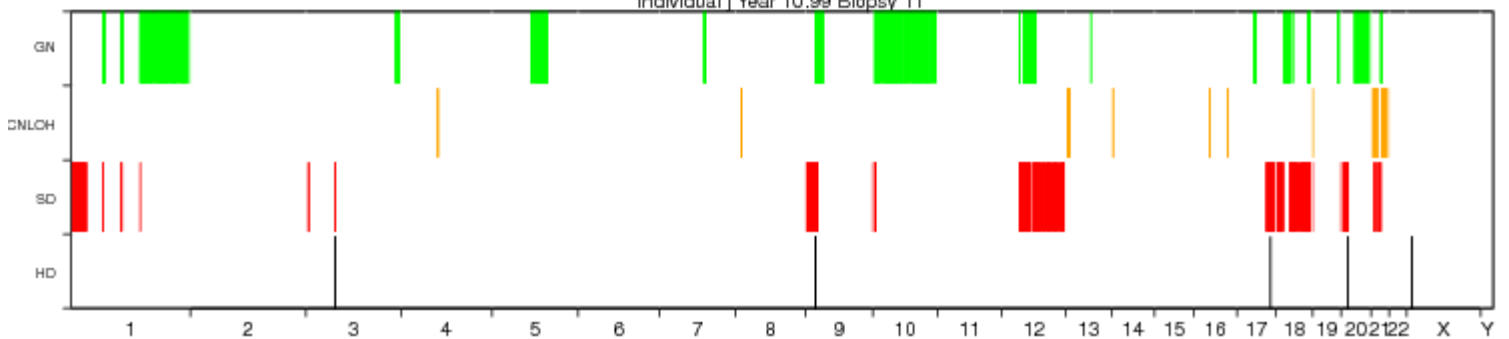

Individual j Year 11.41 Biopsy 12

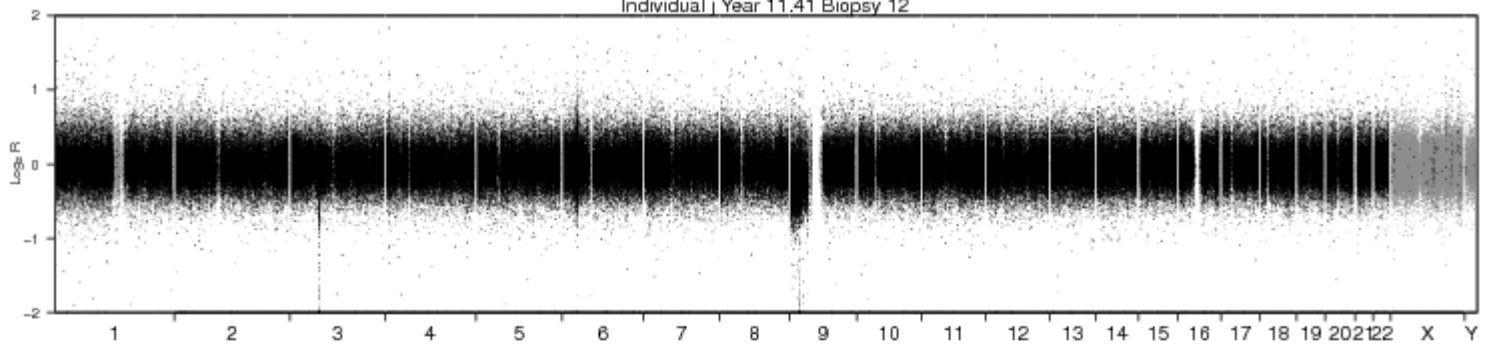

Individual j Year 11.41 Biopsy 12

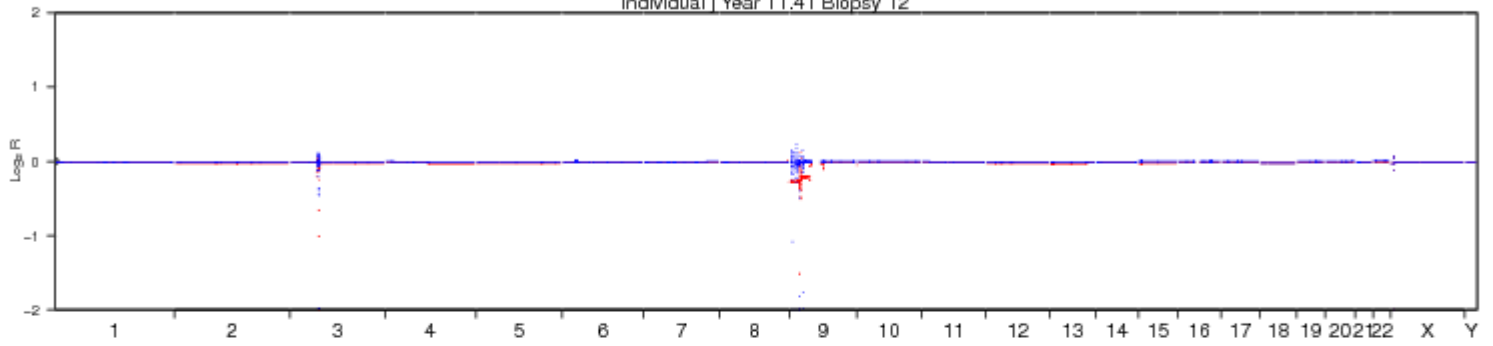

Individual j Year 11.41 Biopsy 12

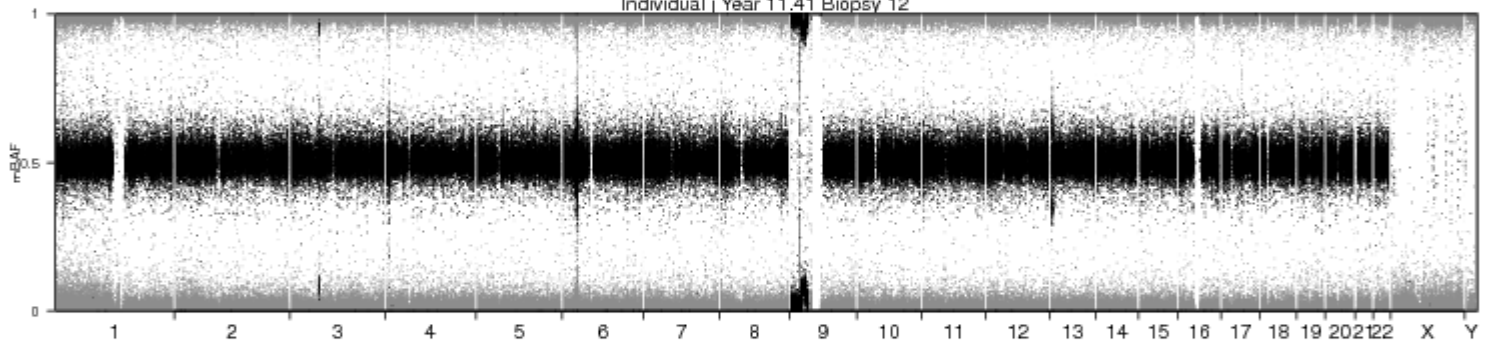

Individual j Year 11.41 Biopsy 12

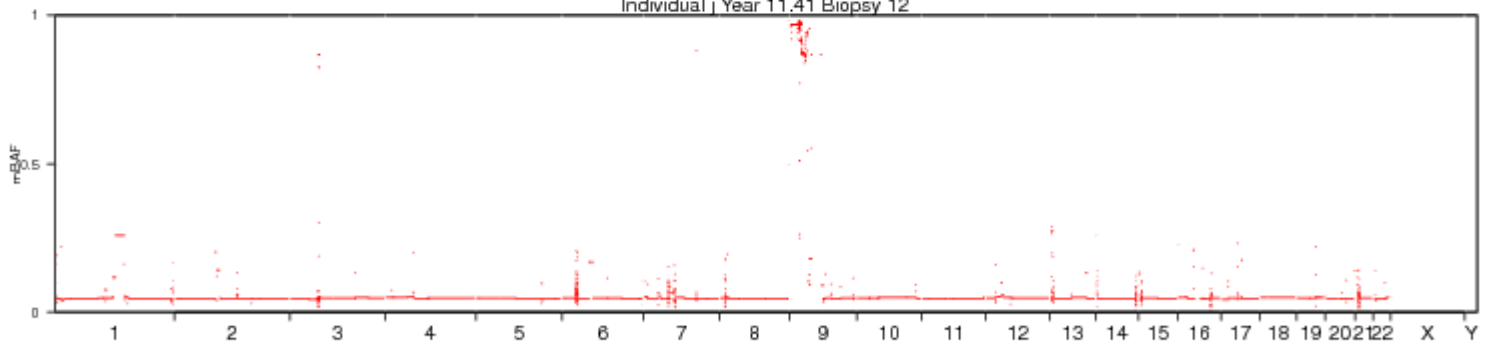

Individual j Year 11.41 Biopsy 12

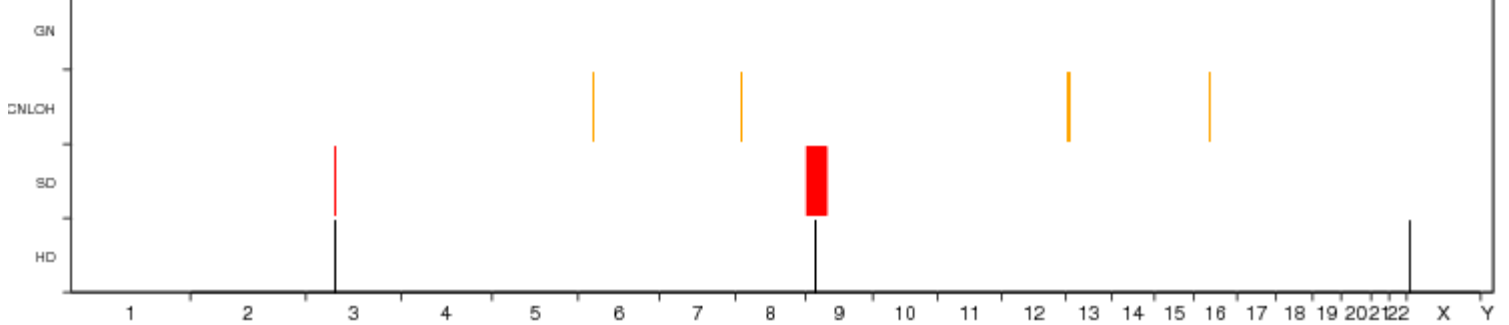

Individual j Year 11.41 Biopsy 13

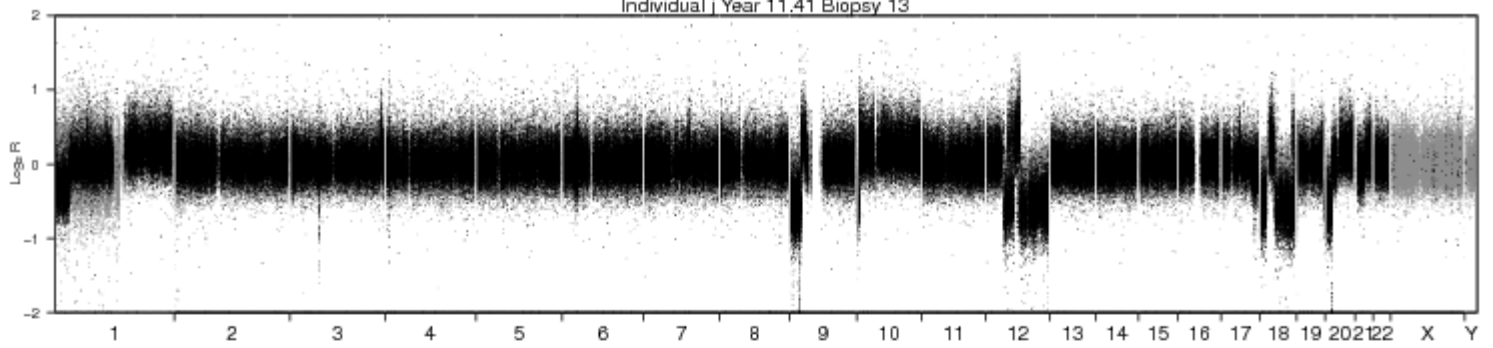

Individual j Year 11.41 Biopsy 13

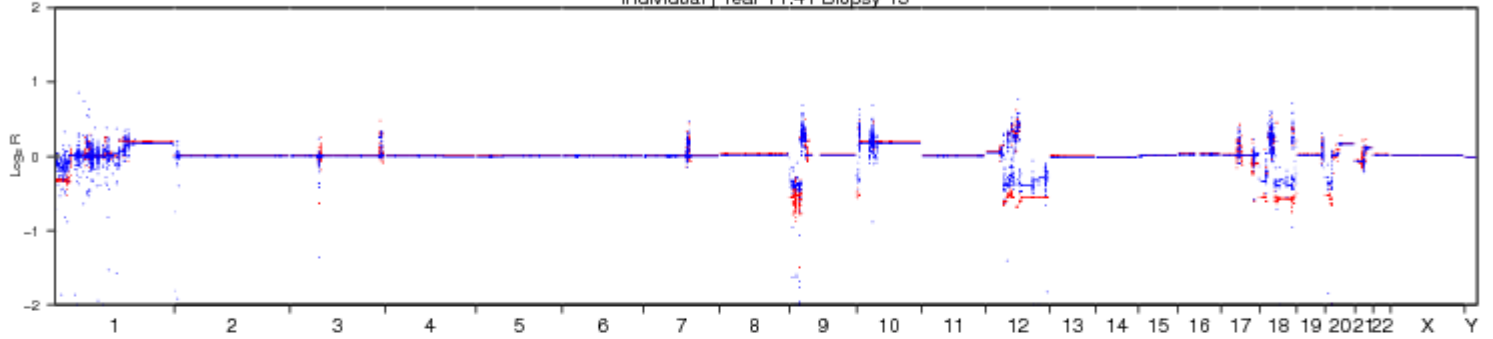

Individual j Year 11.41 Biopsy 13

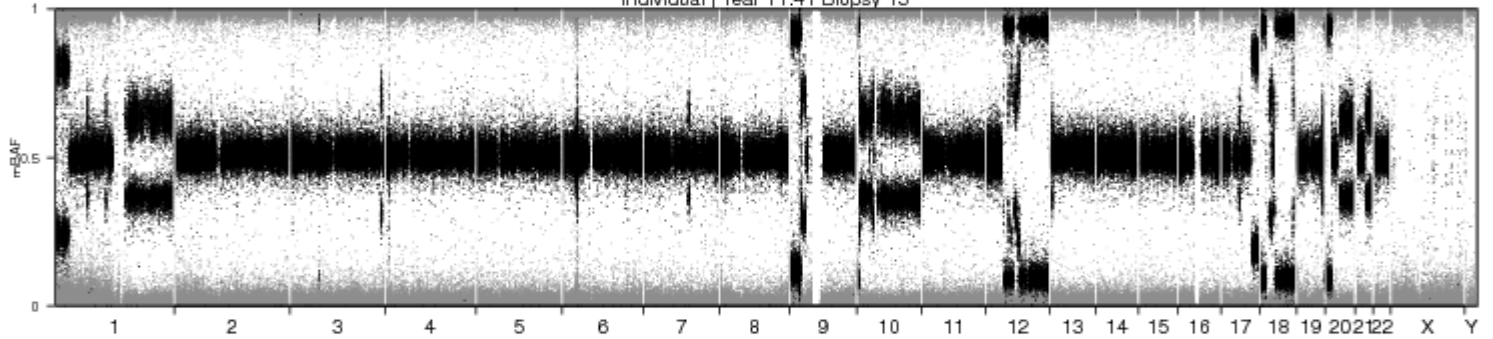

Individual j Year 11.41 Biopsy 13

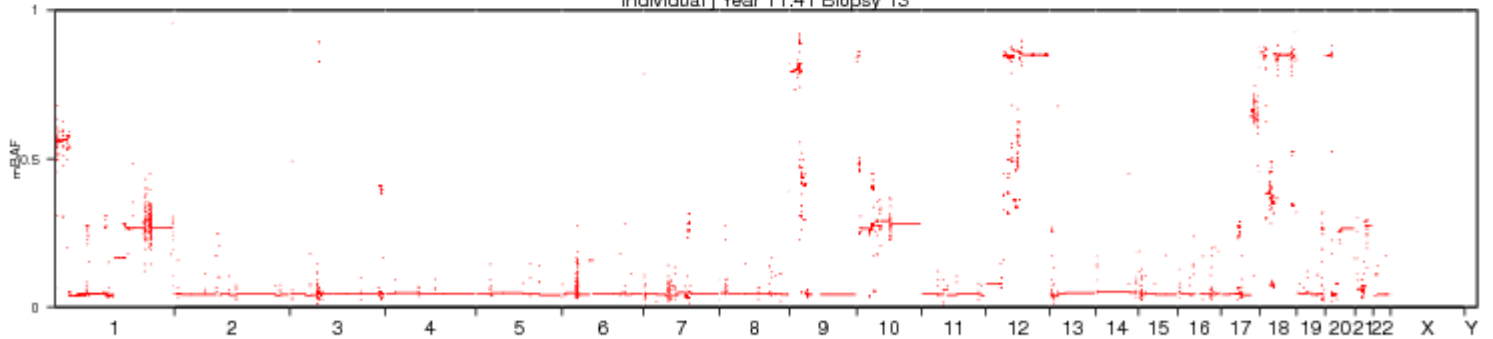

Individual j Year 11.41 Biopsy 13

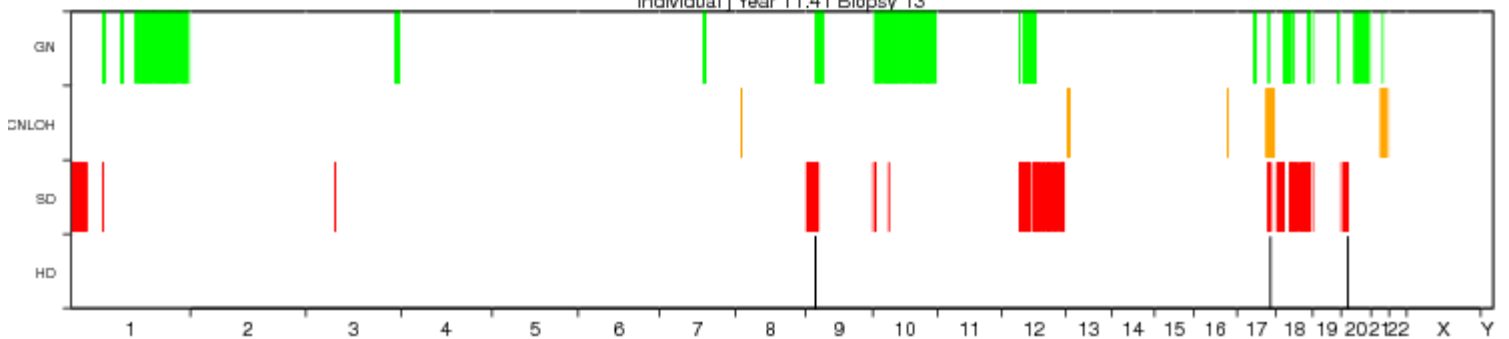

Individual k Year 0 Biopsy 1

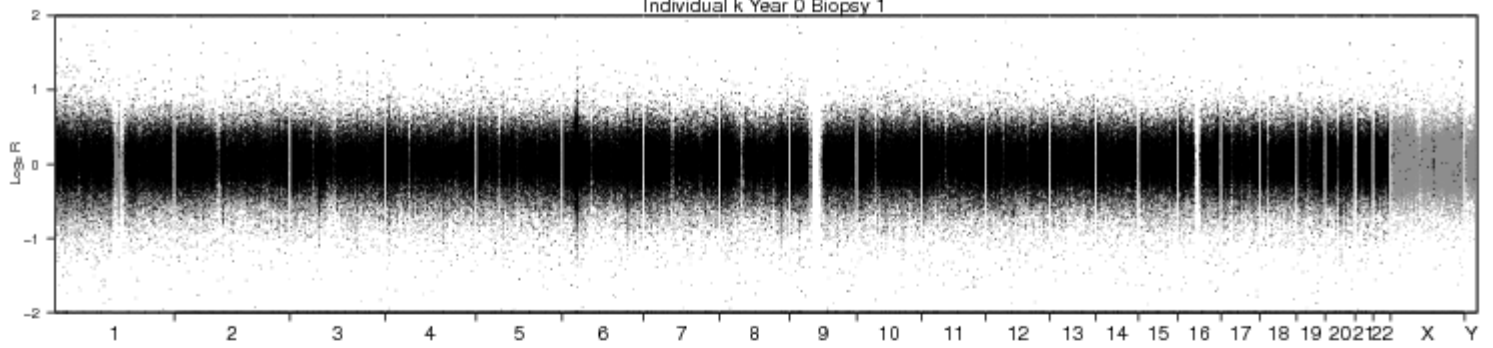

Individual k Year 0 Biopsy 1

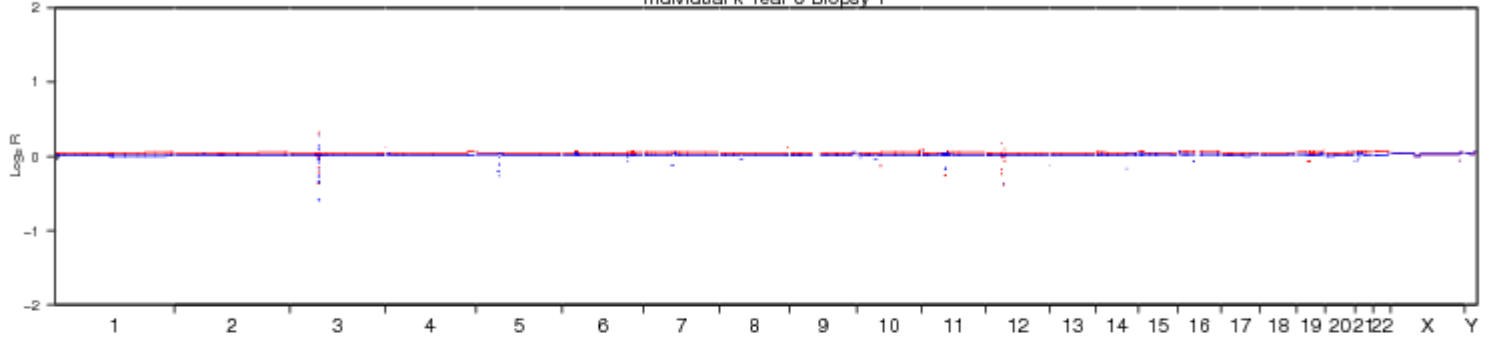

Individual k Year 0 Biopsy 1

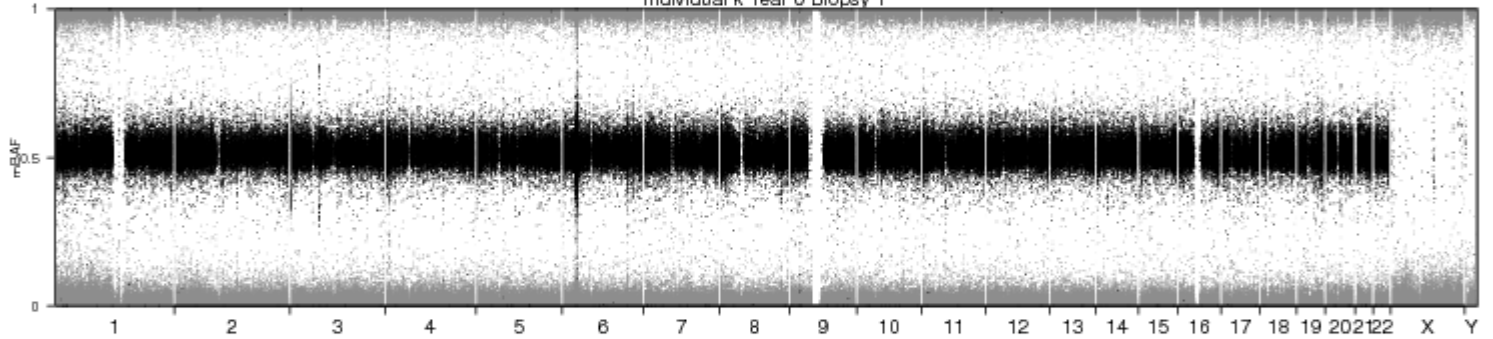

Individual k Year 0 Biopsy 1

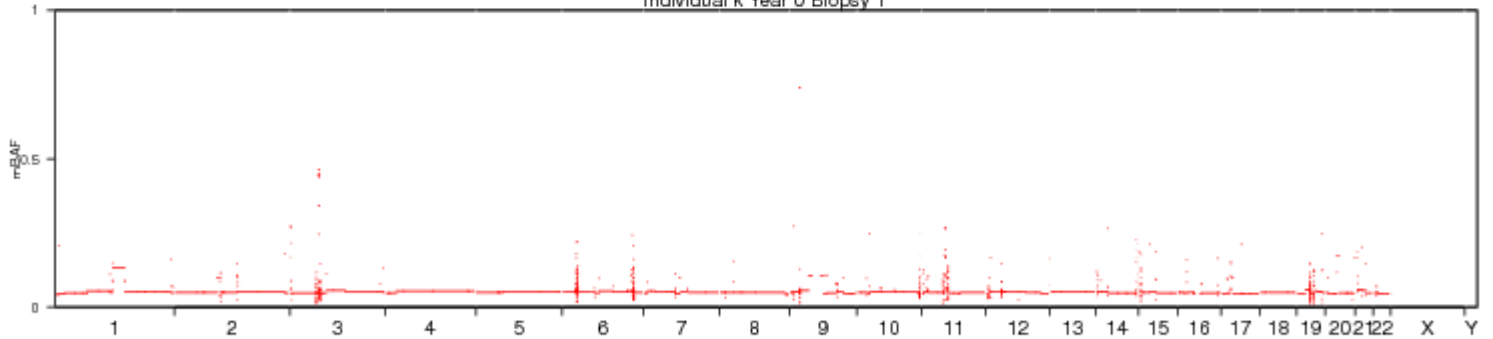

Individual k Year 0 Biopsy 1

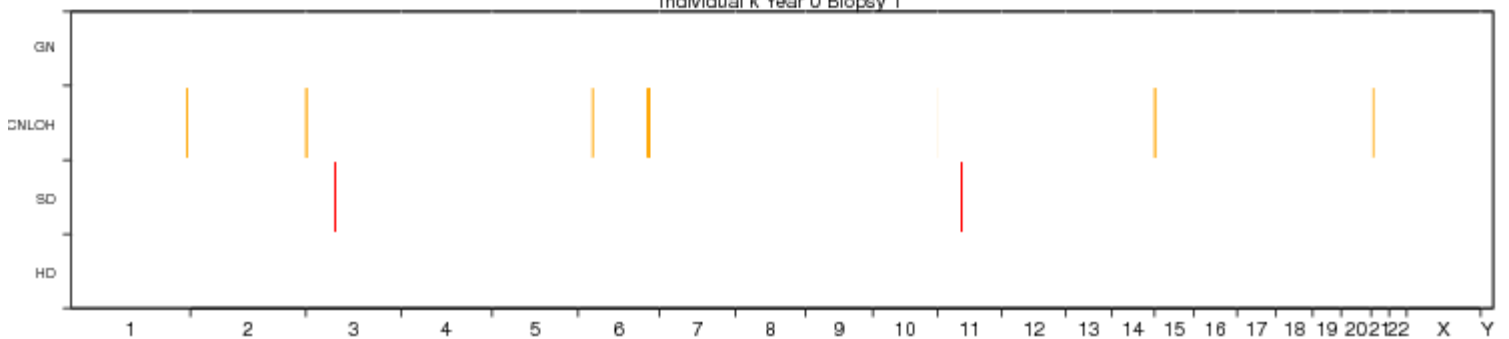



Individual k Year 0 Biopsy 2

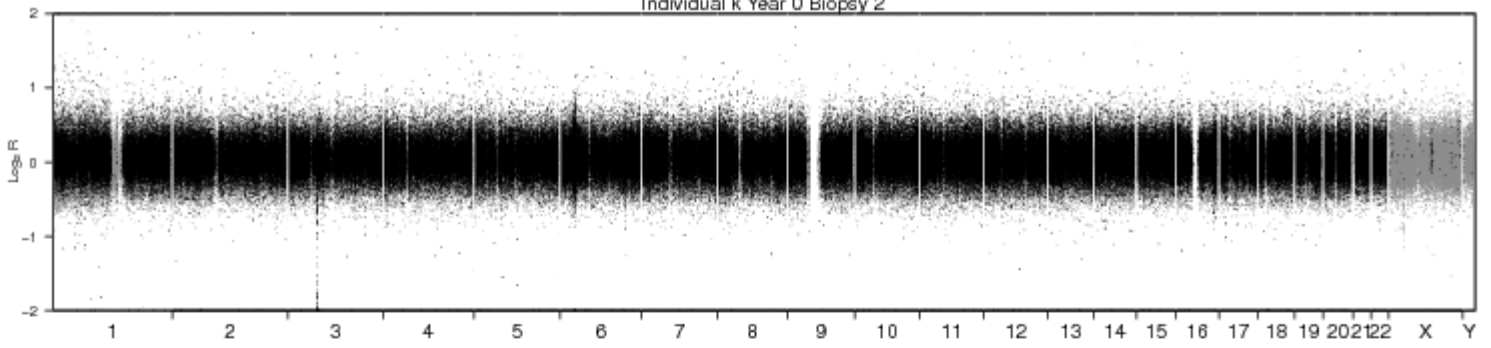

Individual k Year 0 Biopsy 2

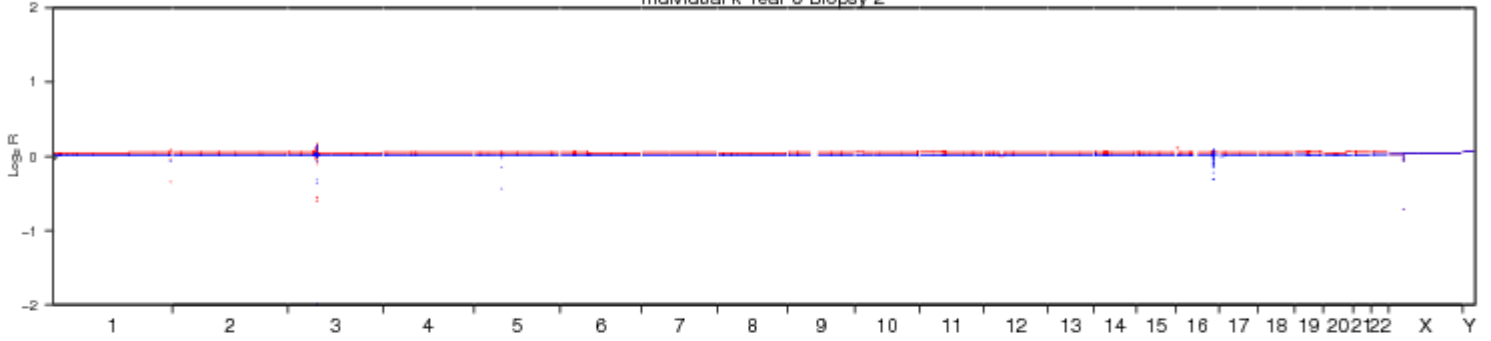

Individual k Year 0 Biopsy 2

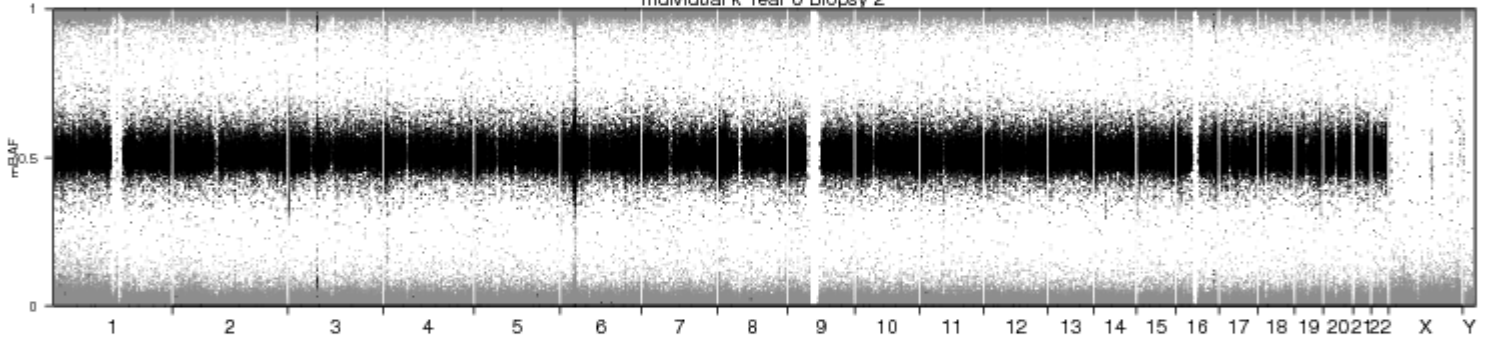

Individual k Year 0 Biopsy 2

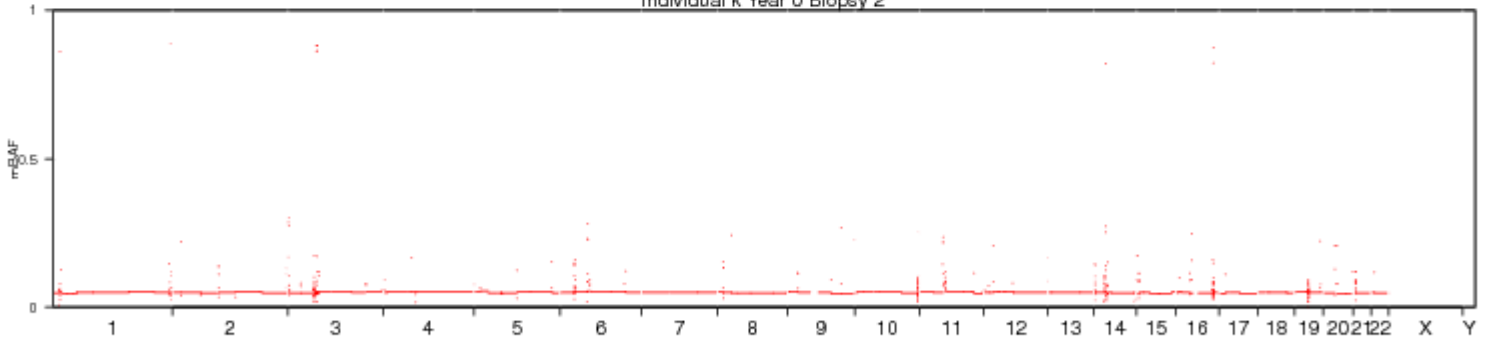

Individual k Year 0 Biopsy 2

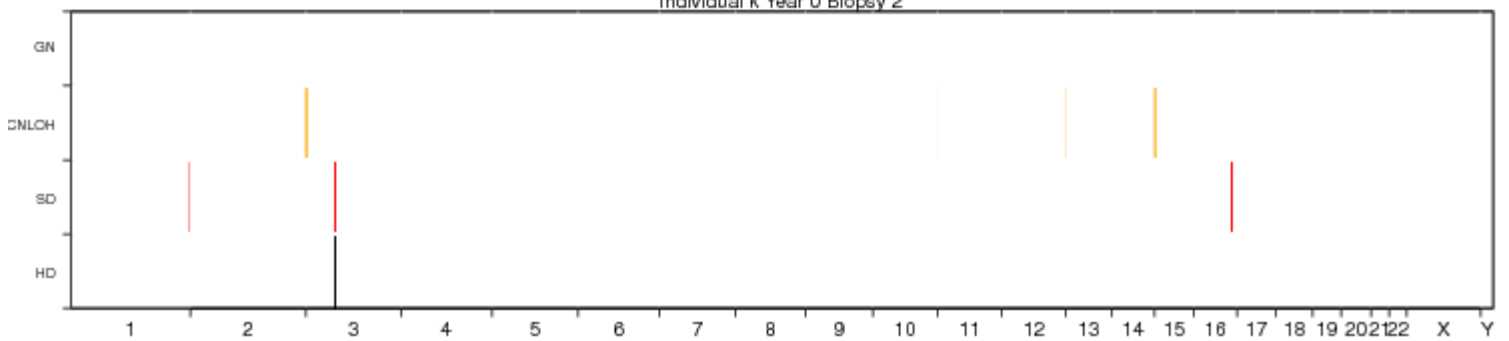

Individual k Year 1.83 Biopsy 3

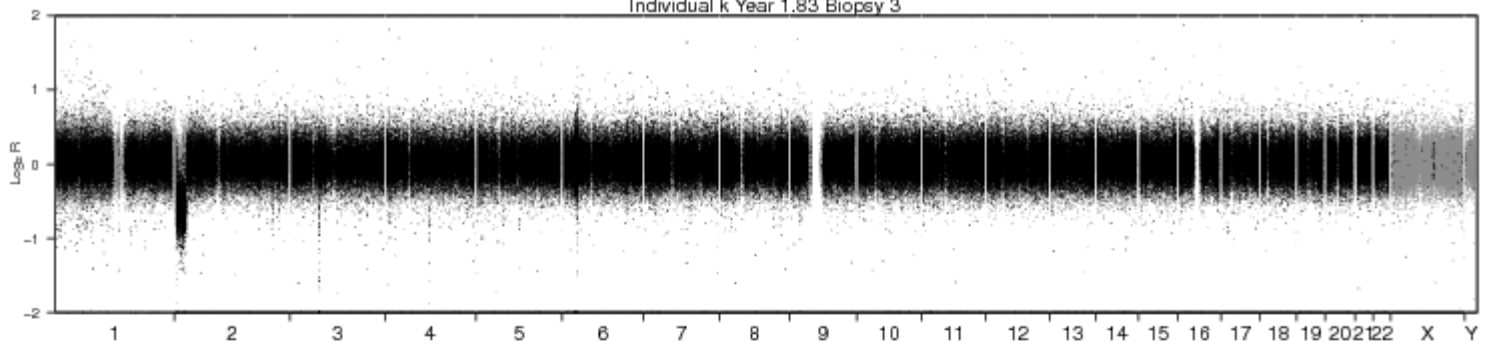

Individual k Year 1.83 Biopsy 3

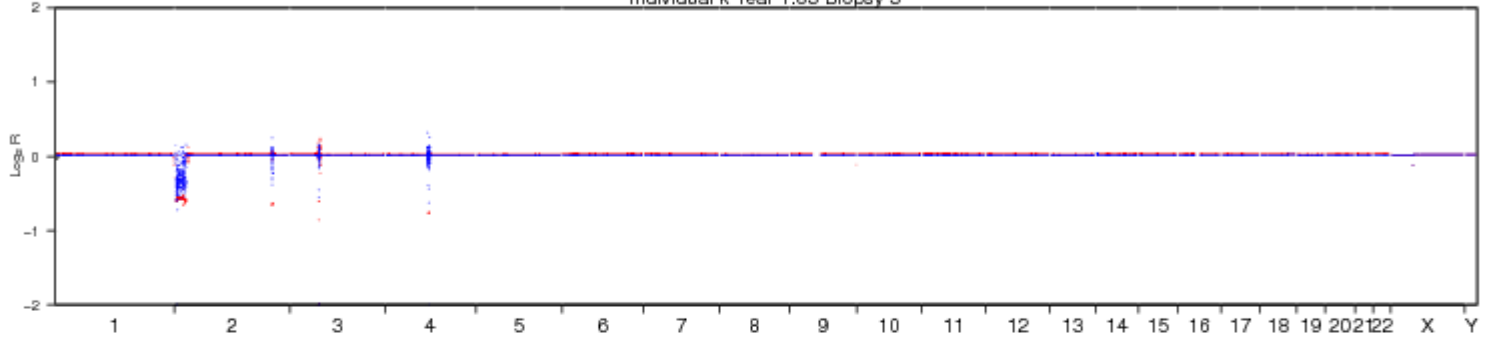

Individual k Year 1.83 Biopsy 3

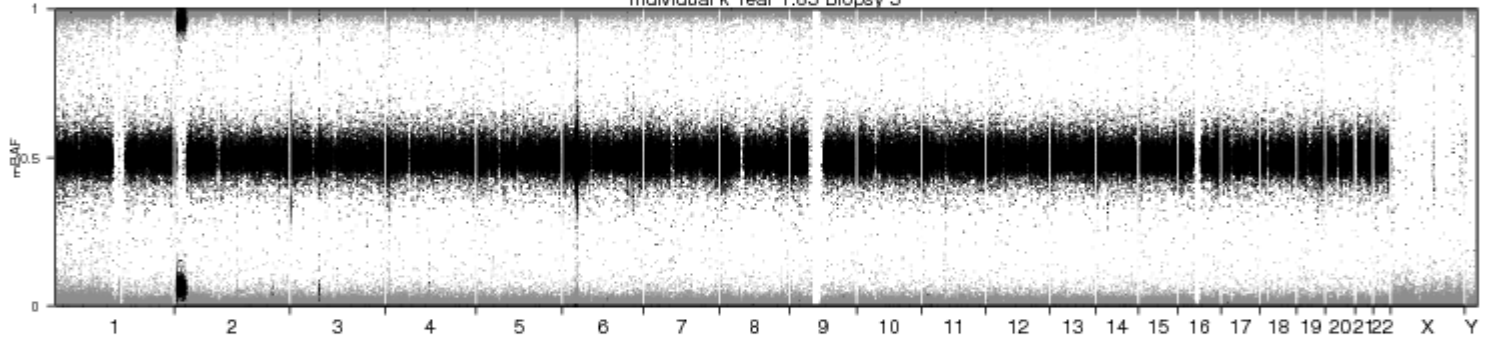

Individual k Year 1.83 Biopsy 3

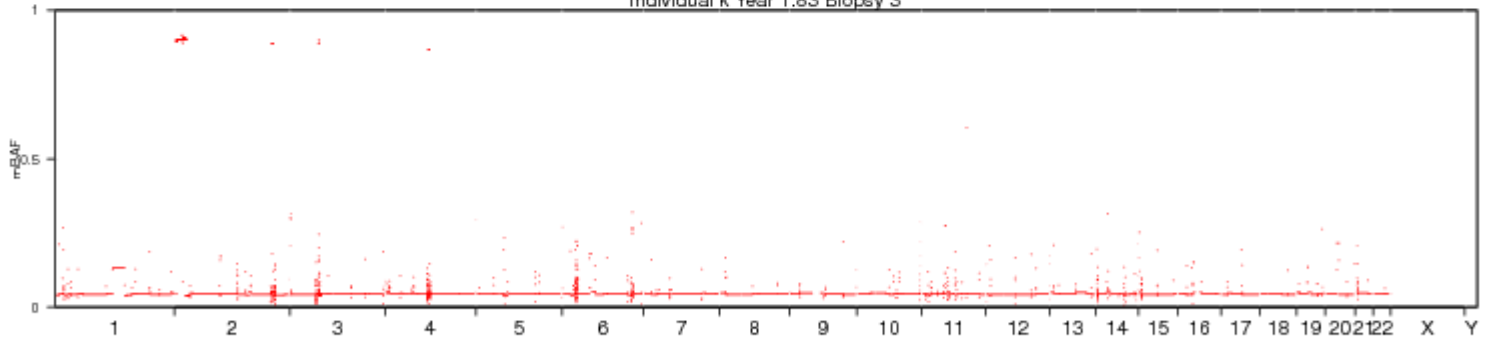

Individual k Year 1.83 Biopsy 3

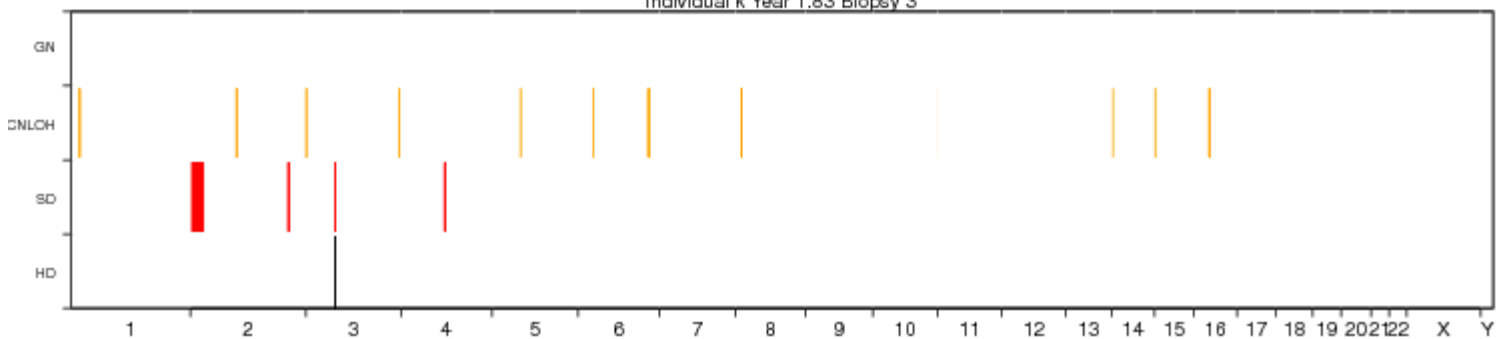

Individual k Year 1.83 Biopsy 4

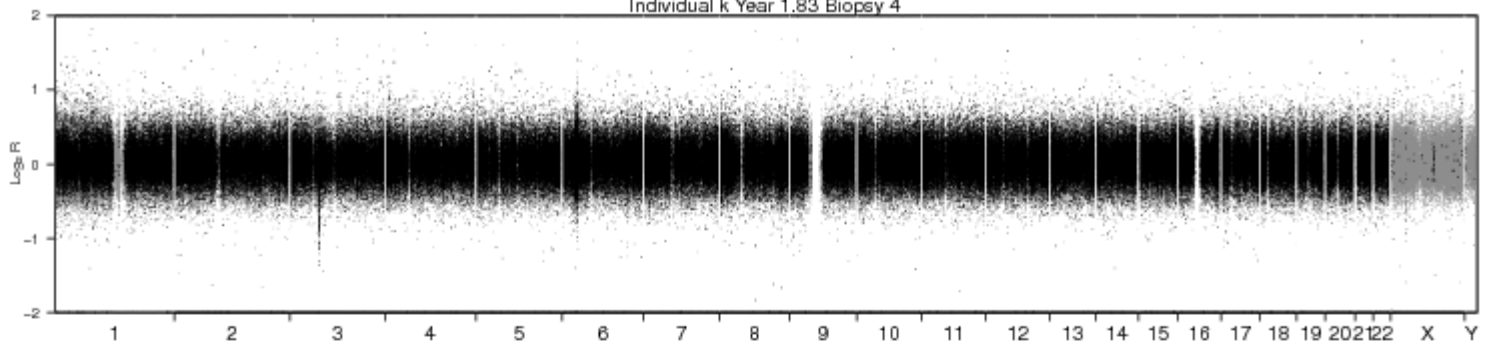

Individual k Year 1.83 Biopsy 4

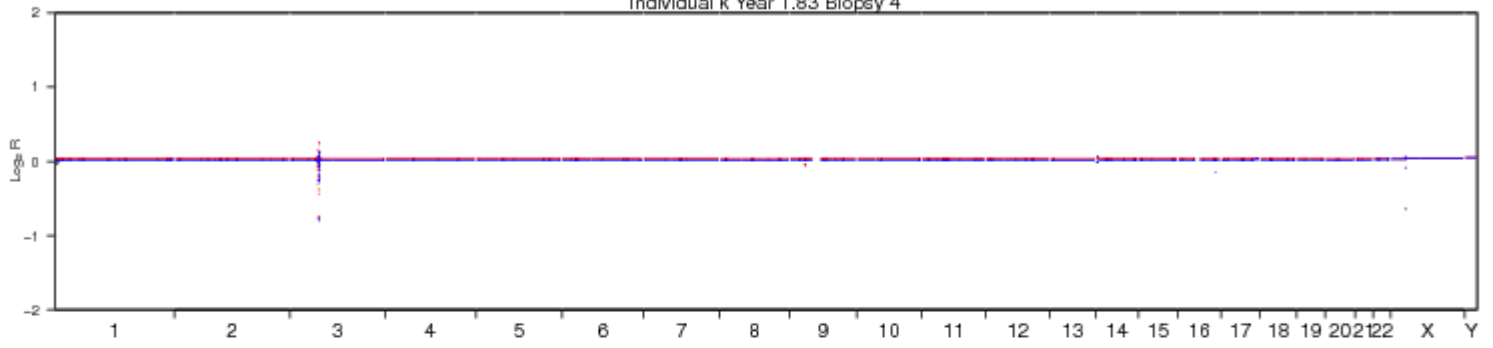

Individual k Year 1.83 Biopsy 4

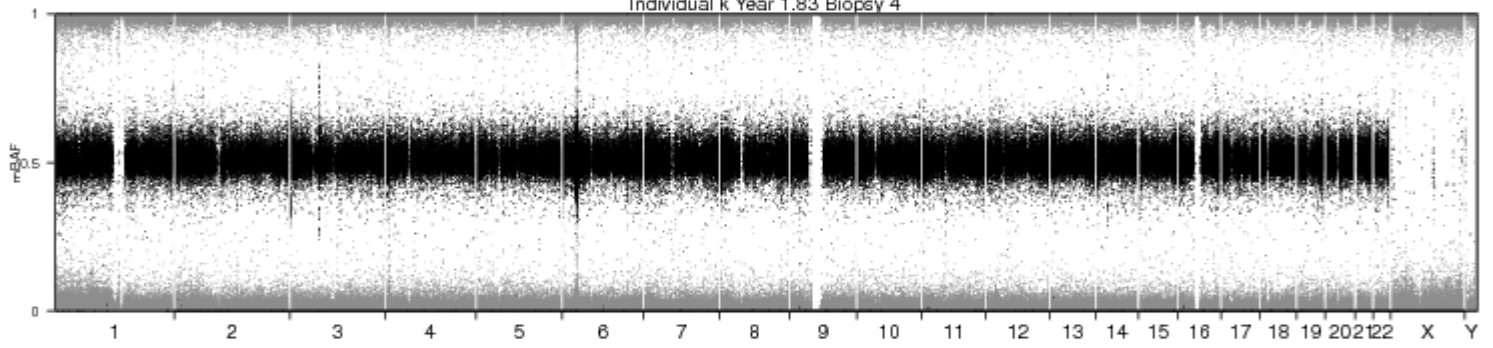

Individual k Year 1.83 Biopsy 4

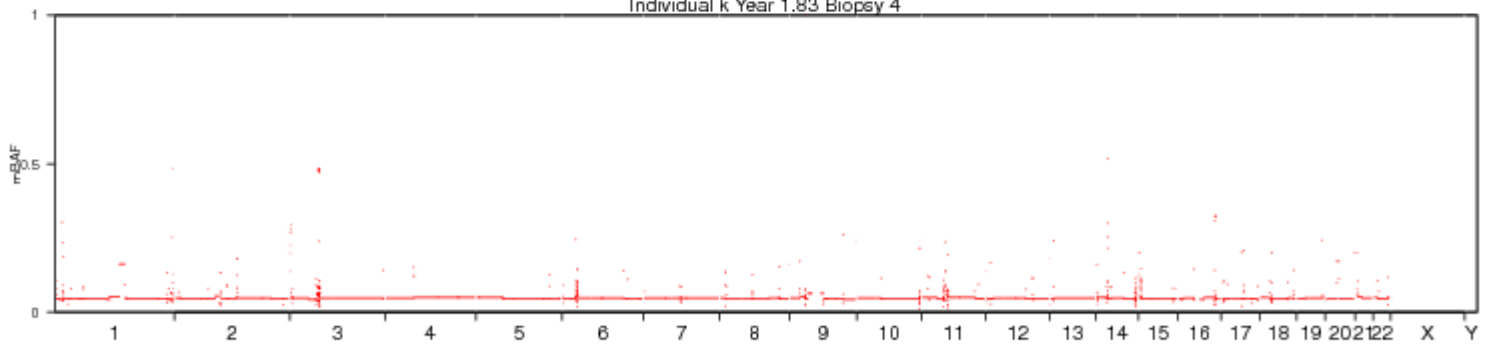

Individual k Year 1.83 Biopsy 4

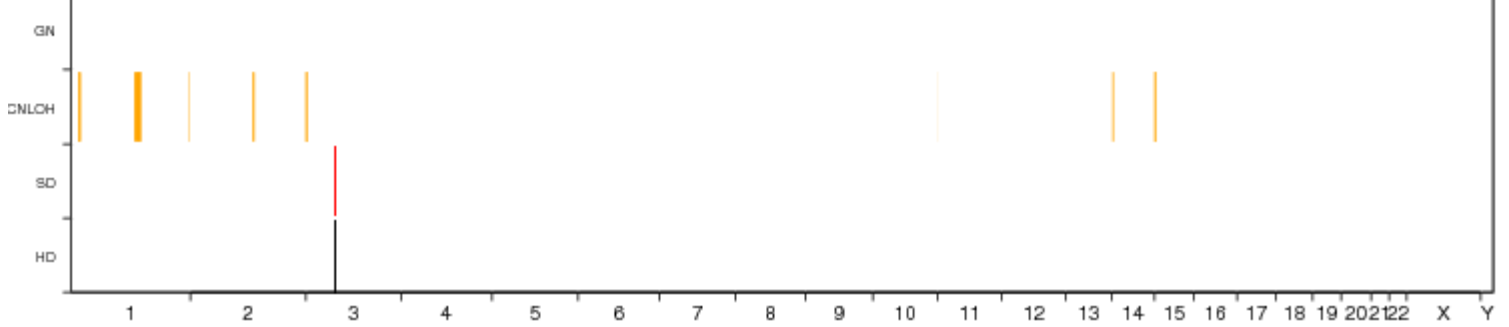

Individual k Year 8.28 Biopsy 5

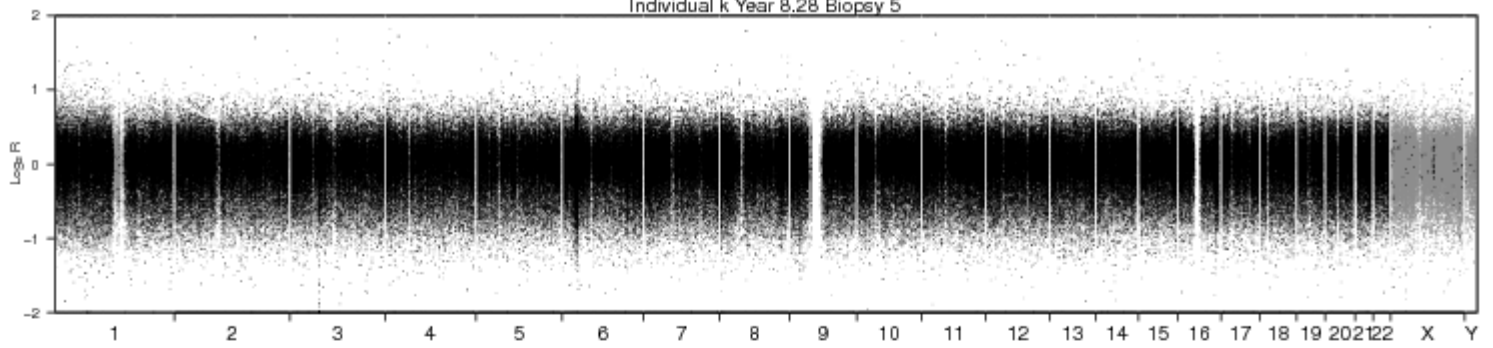

Individual k Year 8.28 Biopsy 5

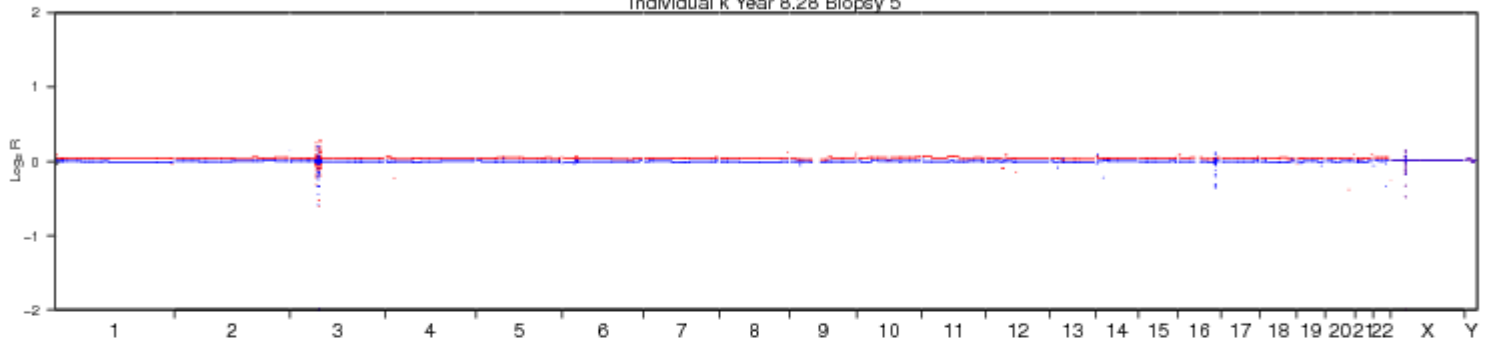

Individual k Year 8.28 Biopsy 5

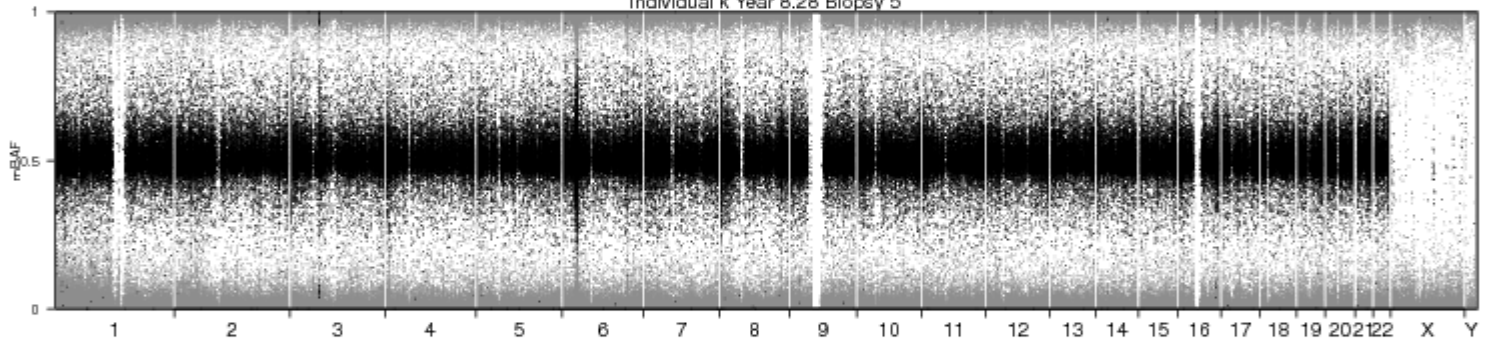

Individual k Year 8.28 Biopsy 5

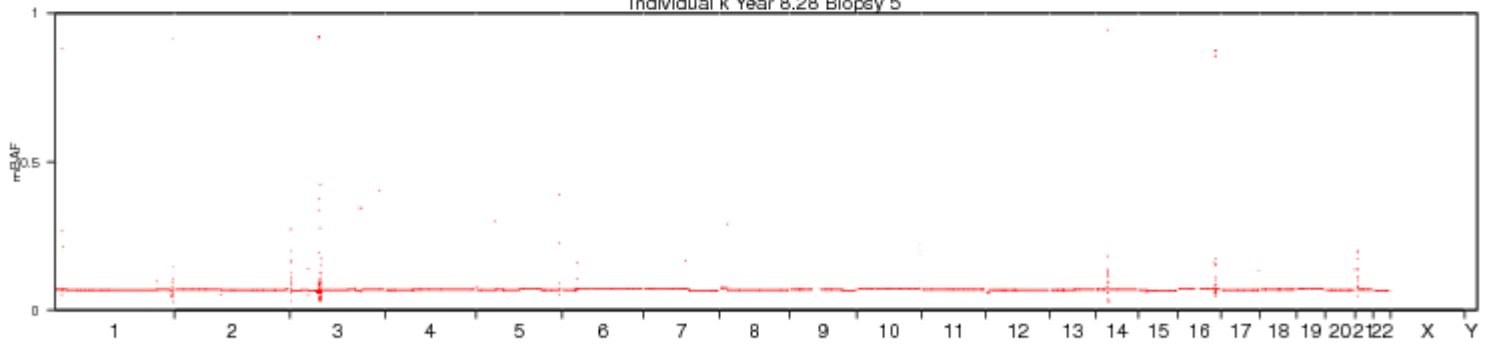

Individual k Year 8.28 Biopsy 5

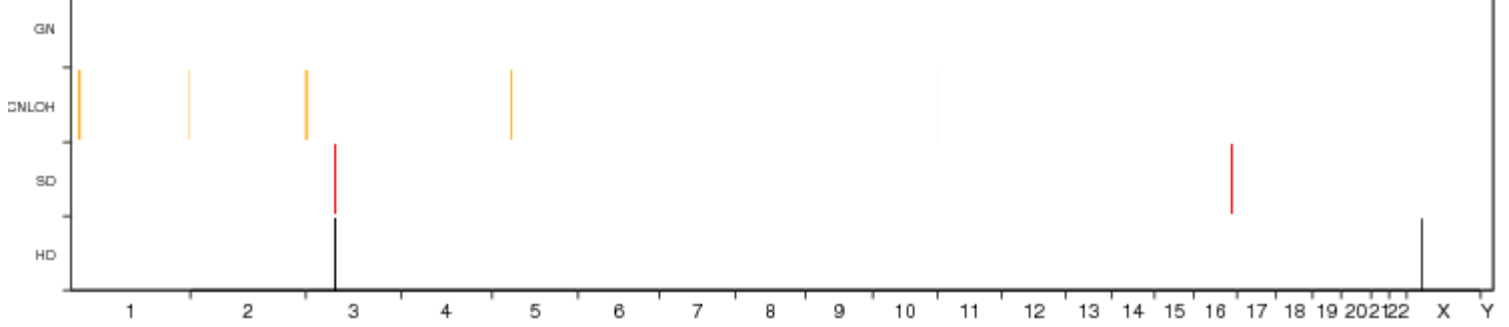



Individual k Year 8.28 Biopsy 6

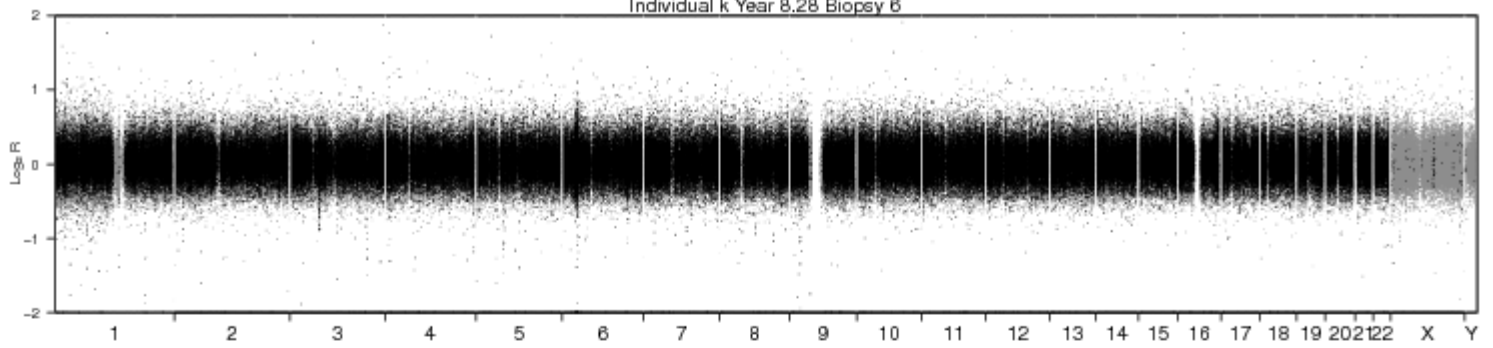

Individual k Year 8.28 Biopsy 6

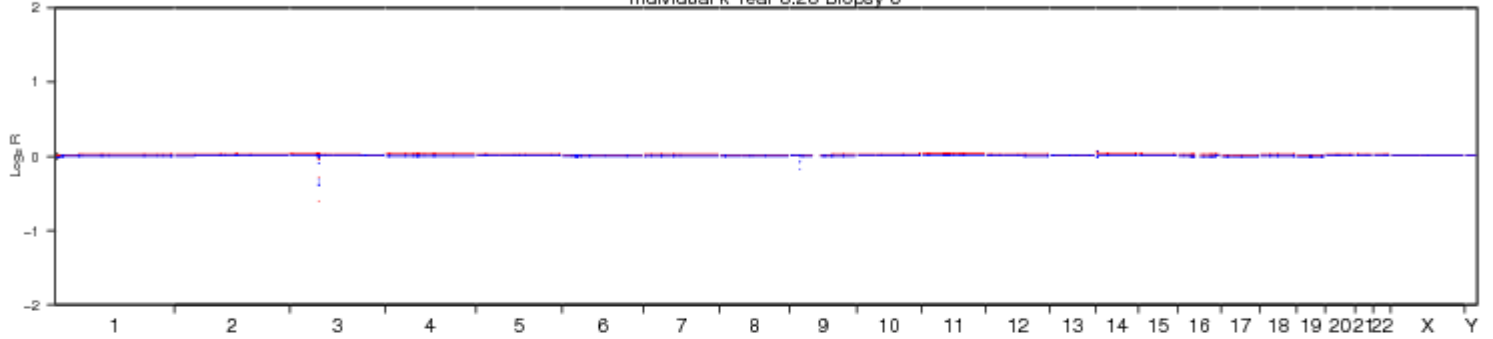

Individual k Year 8.28 Biopsy 6

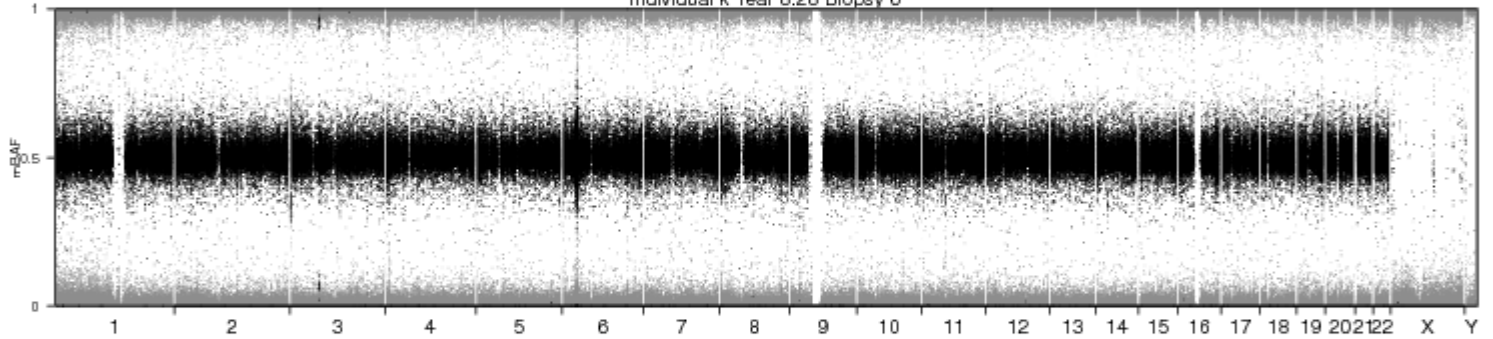

Individual k Year 8.28 Biopsy 6

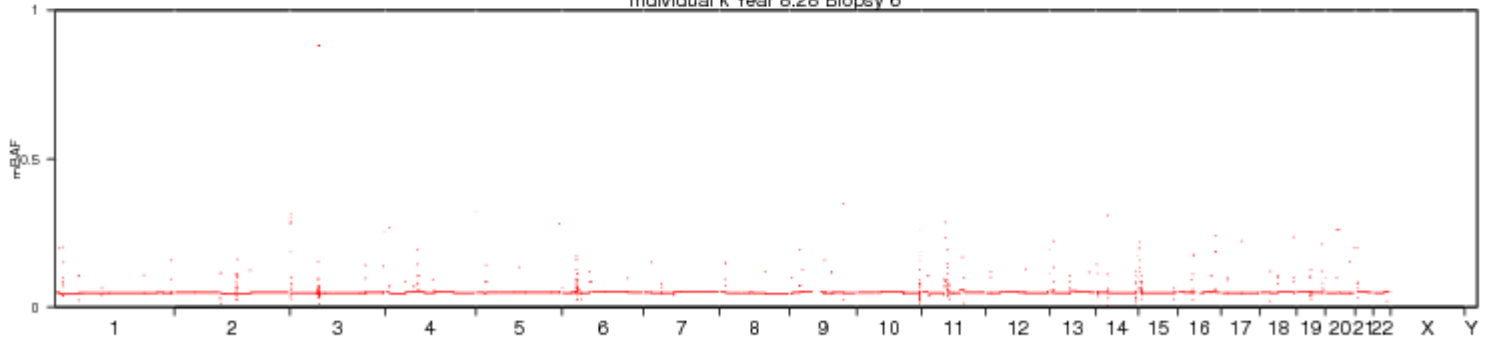

Individual k Year 8.28 Biopsy 6

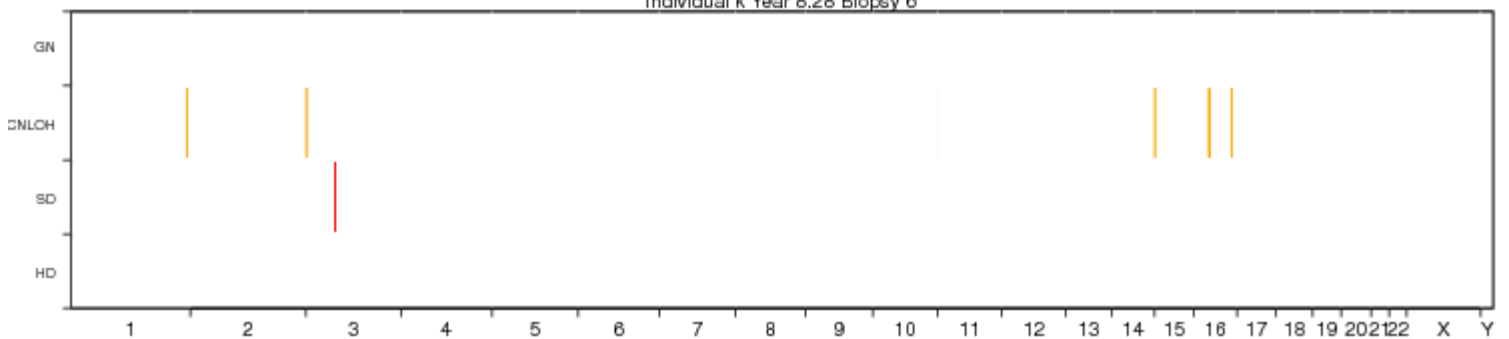

Individual k Year 11.5 Biopsy 7

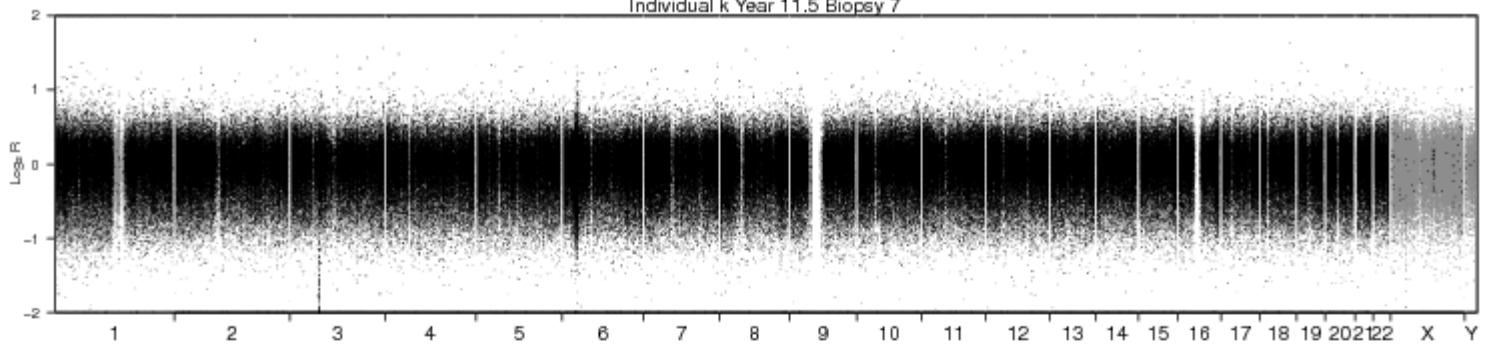

Individual k Year 11.5 Biopsy 7

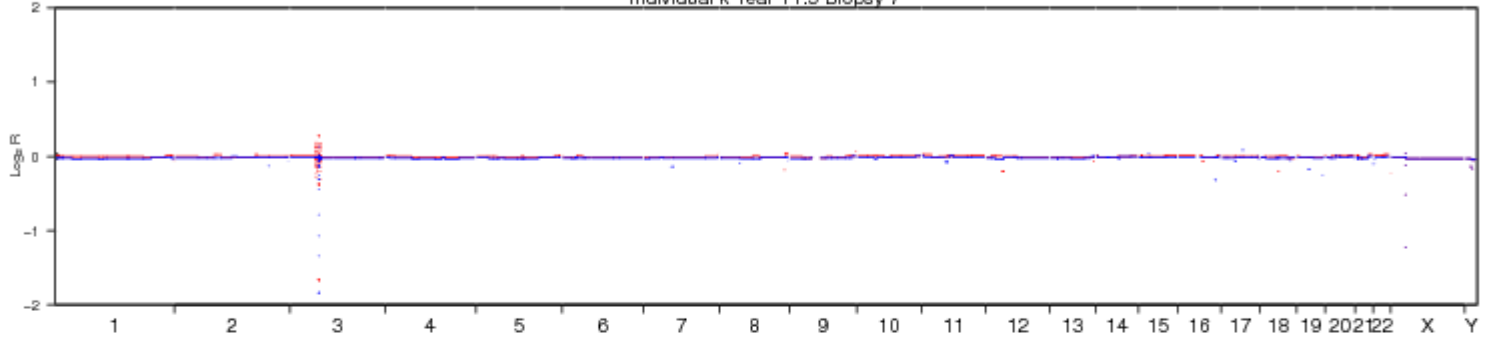

Individual k Year 11.5 Biopsy 7

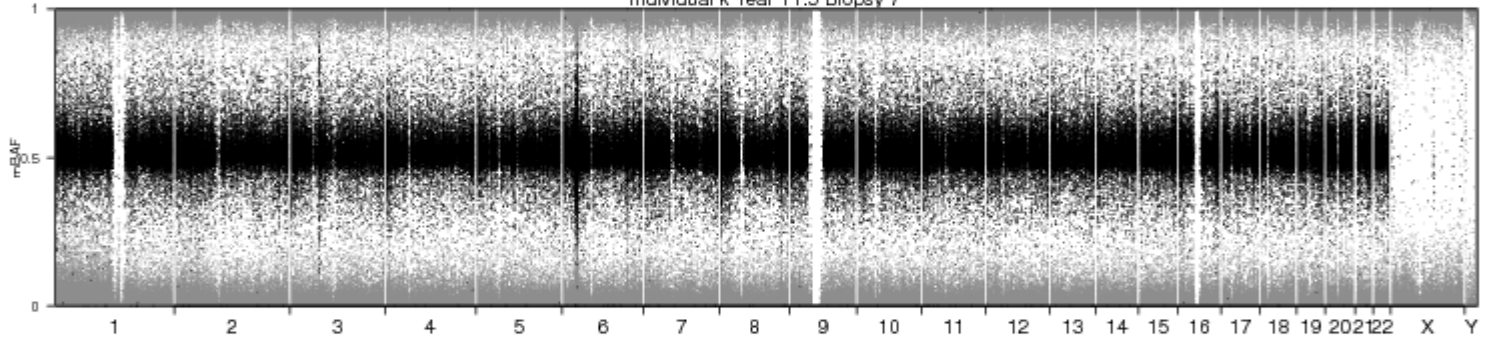

Individual k Year 11.5 Biopsy 7

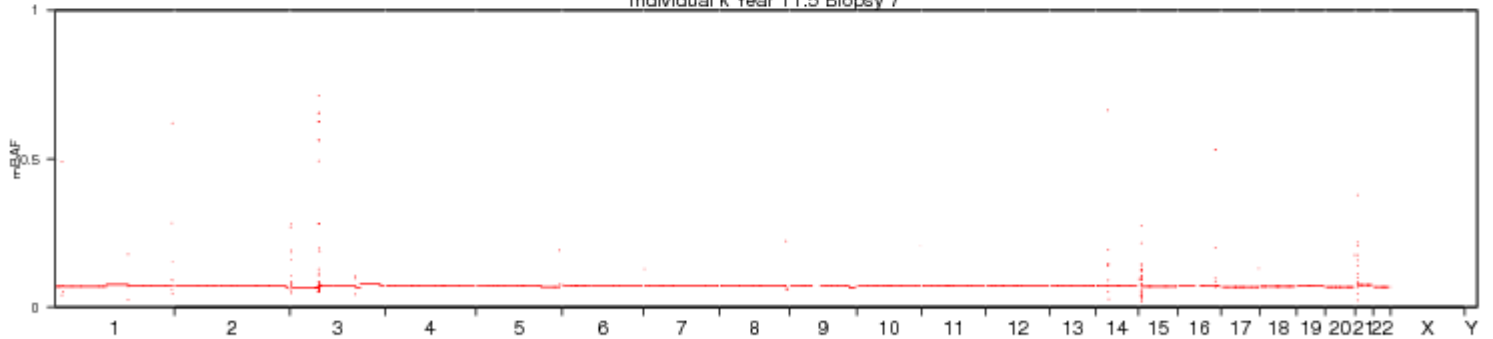

Individual k Year 11.5 Biopsy 7

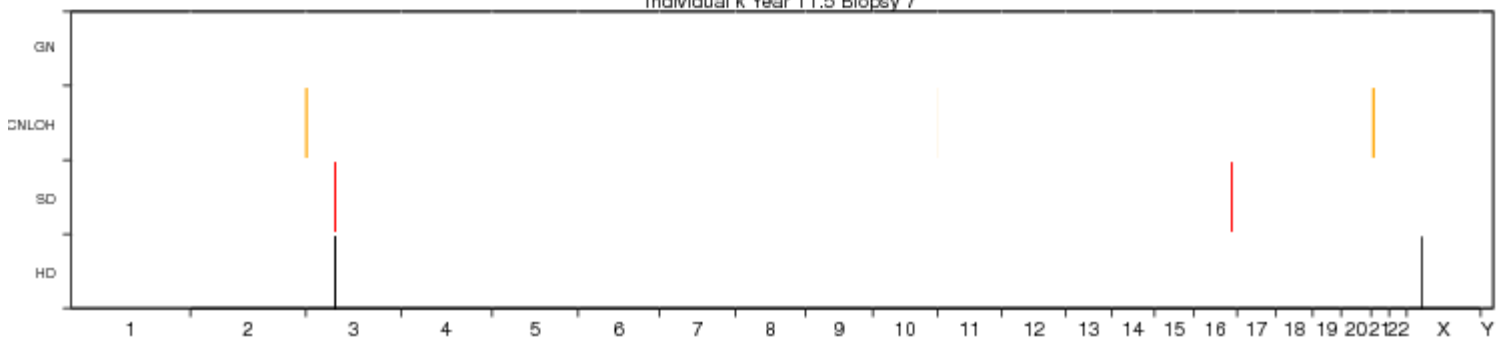

Individual k Year 11.5 Biopsy 8

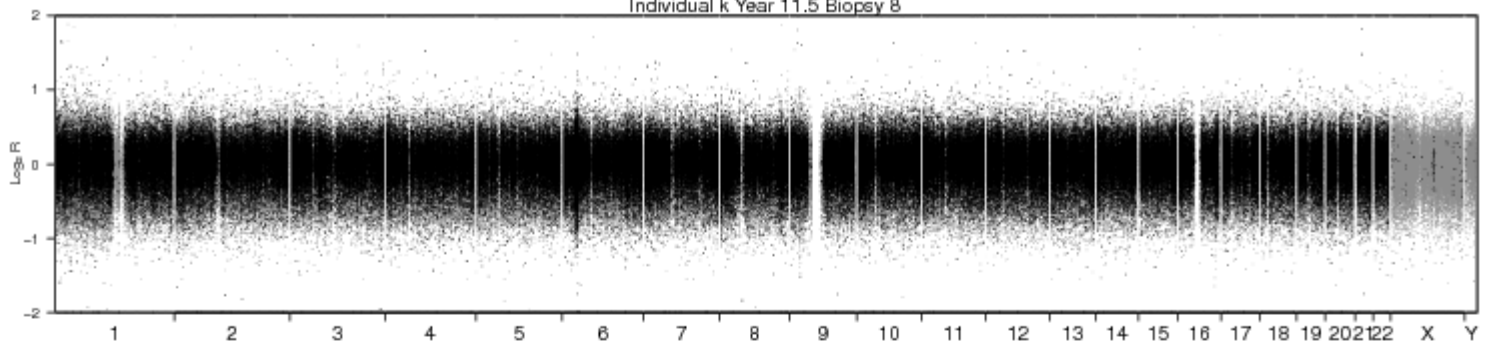

Individual k Year 11.5 Biopsy 8

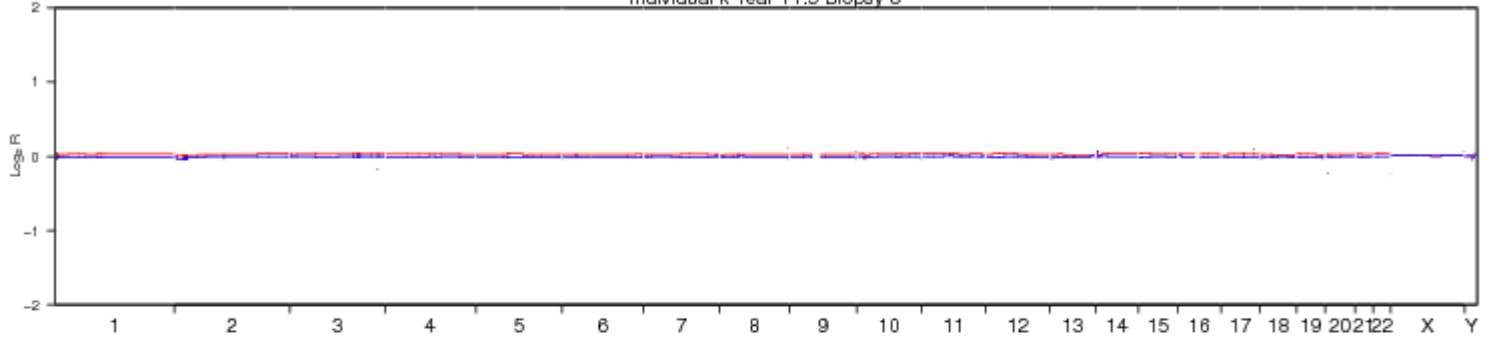

Individual k Year 11.5 Biopsy 8

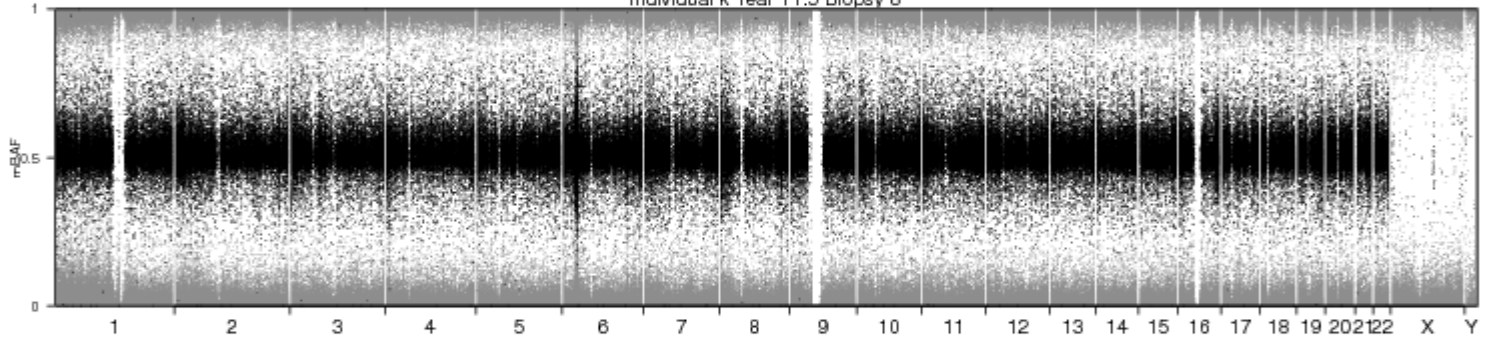

Individual k Year 11.5 Biopsy 8

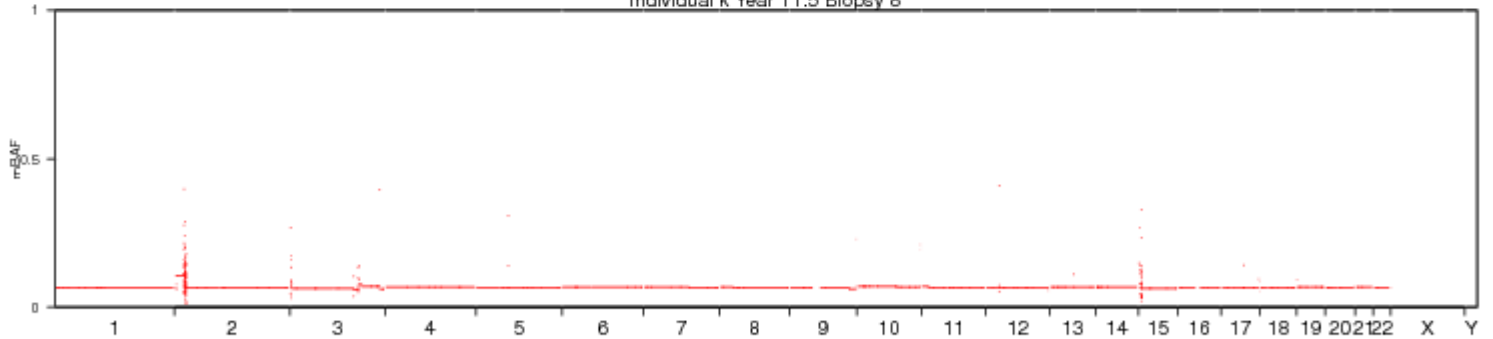

Individual k Year 11.5 Biopsy 8

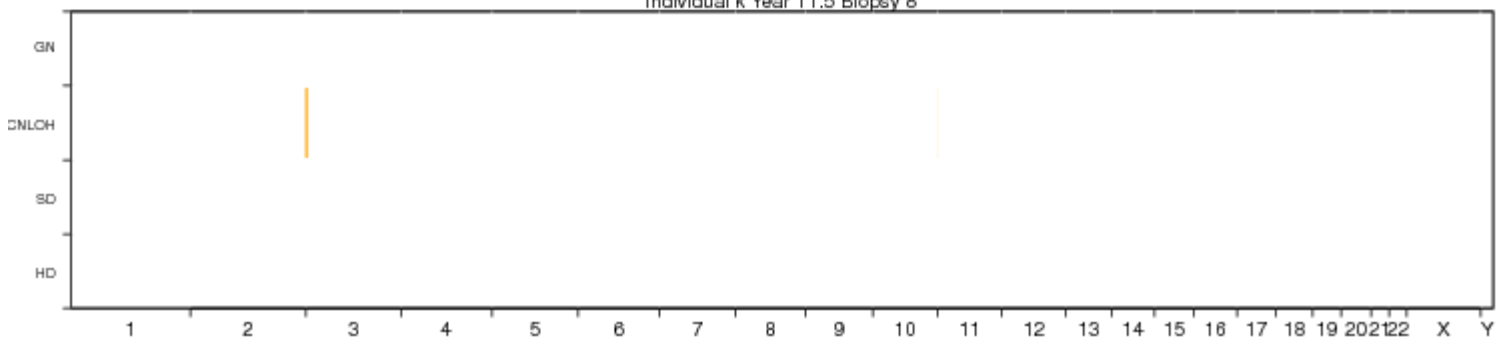

Individual k Year 11.5 Biopsy 9

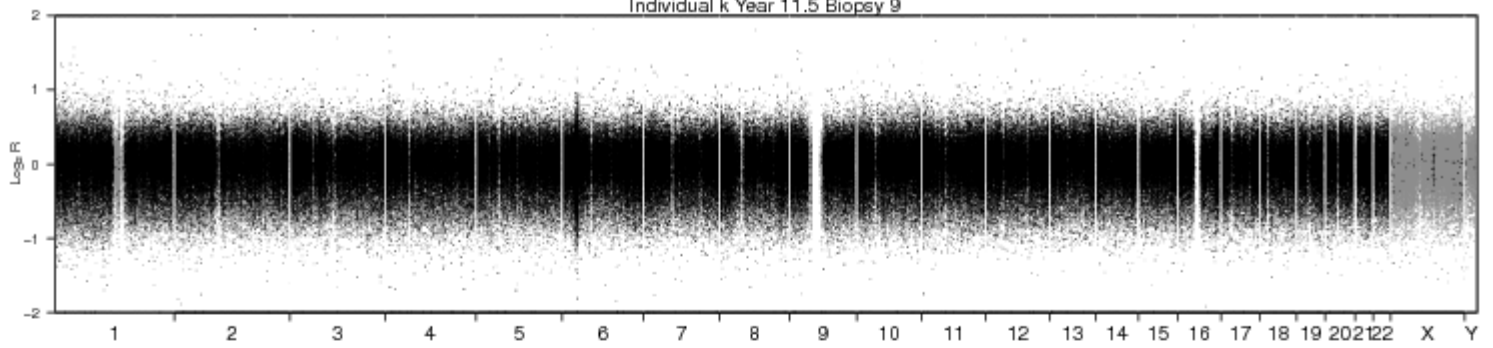

Individual k Year 11.5 Biopsy 9

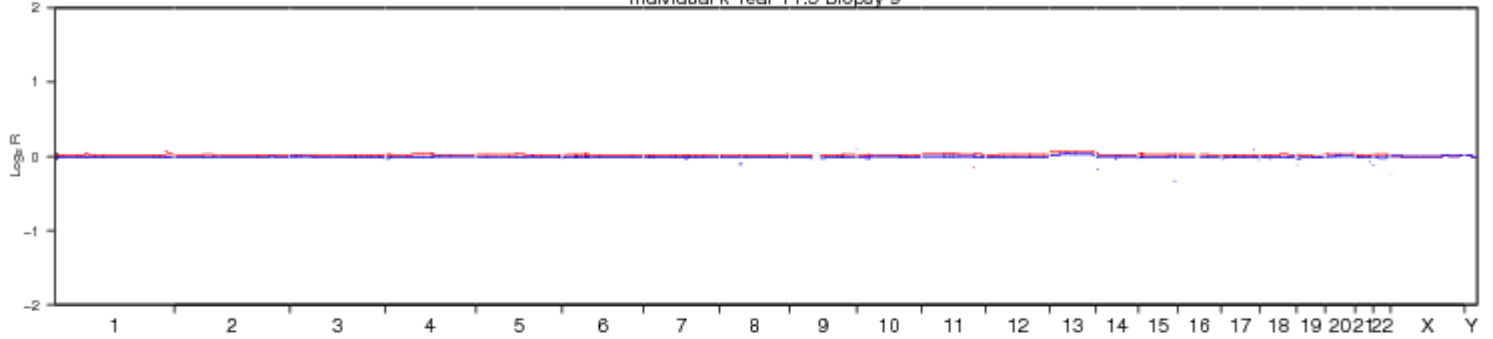

Individual k Year 11.5 Biopsy 9

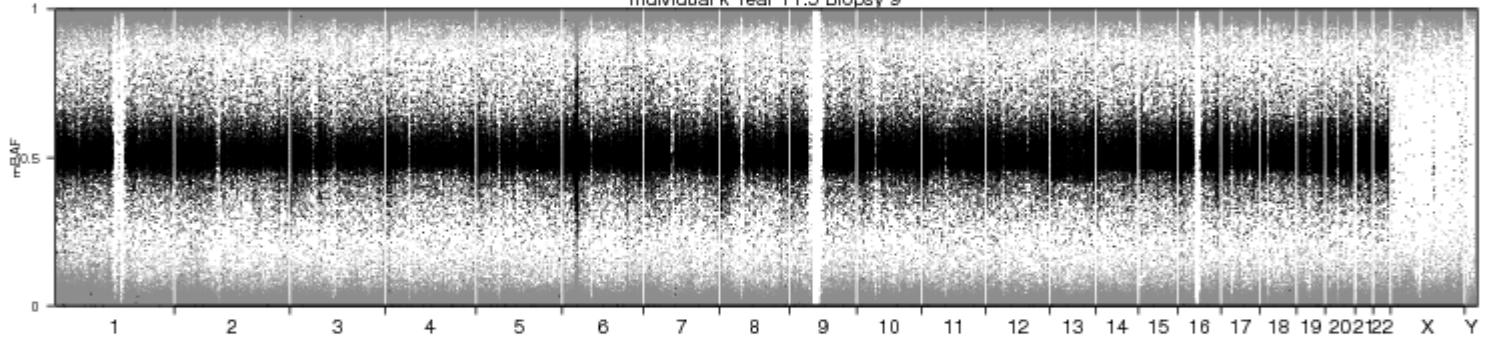

Individual k Year 11.5 Biopsy 9

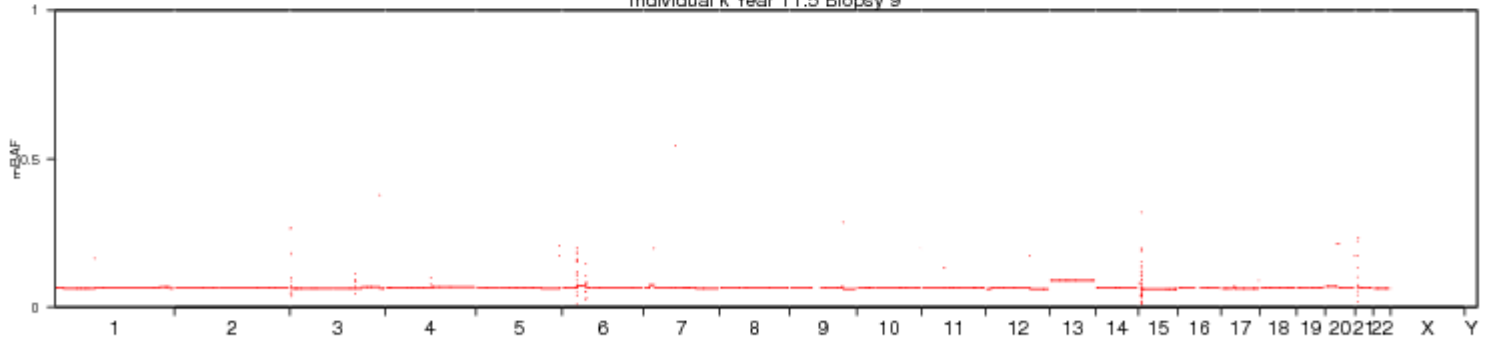

Individual k Year 11.5 Biopsy 9

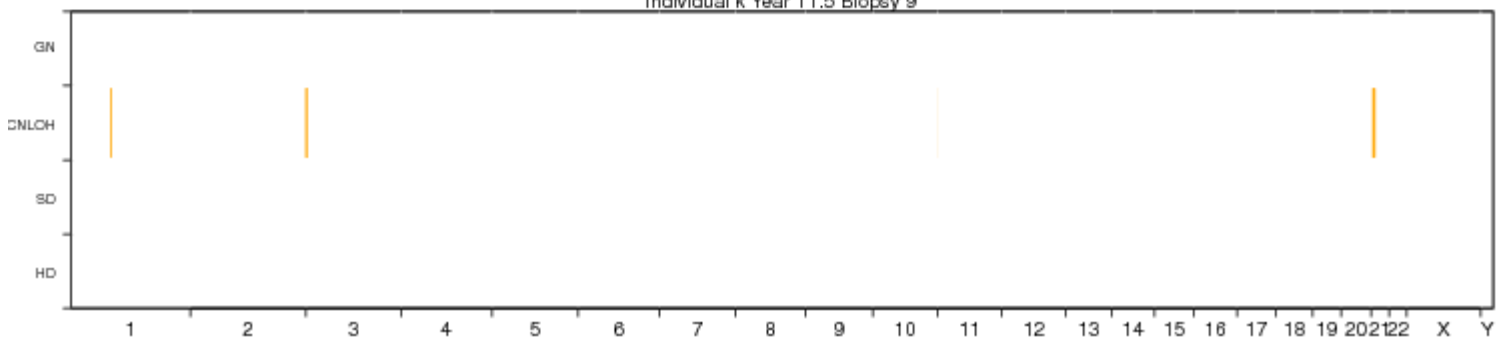



Individual k Year 12.73 Biopsy 10

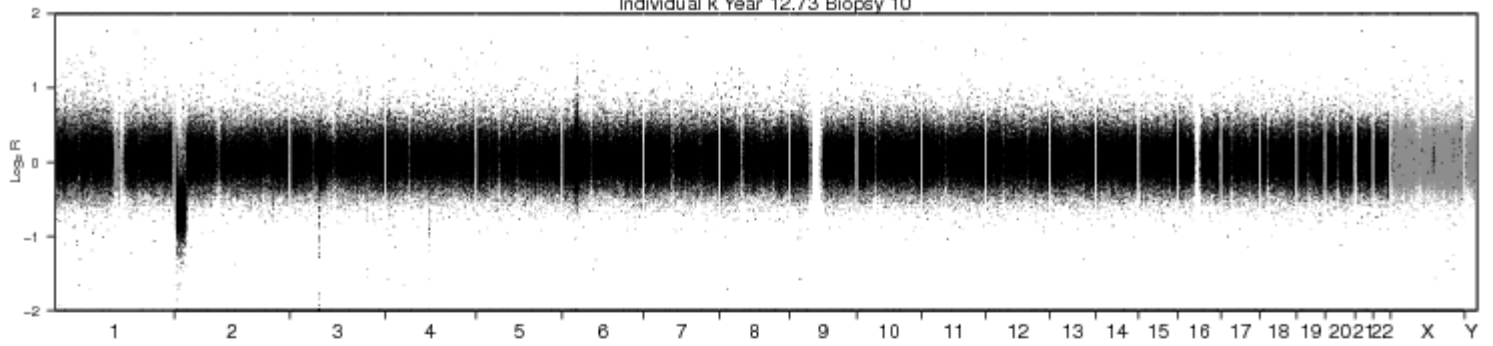

Individual k Year 12.73 Biopsy 10

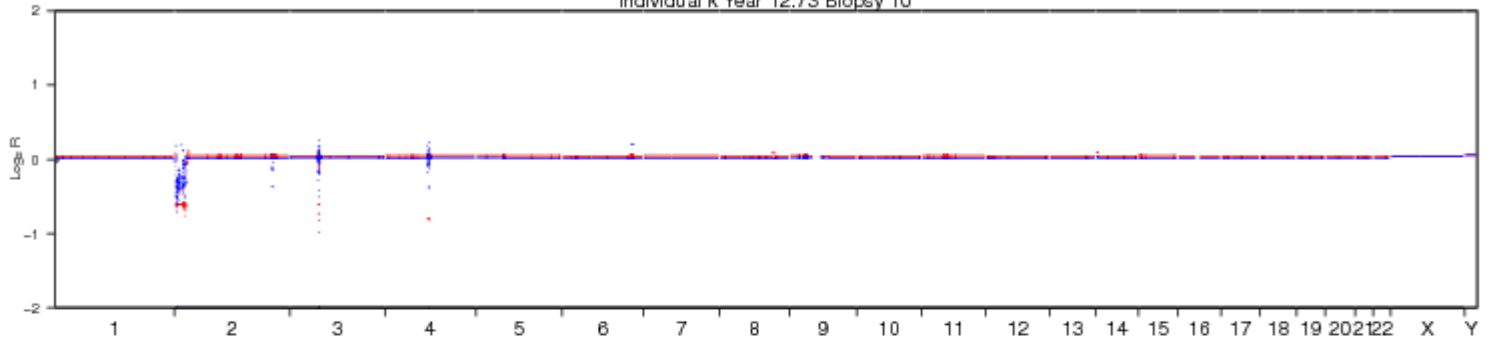

Individual k Year 12.73 Biopsy 10

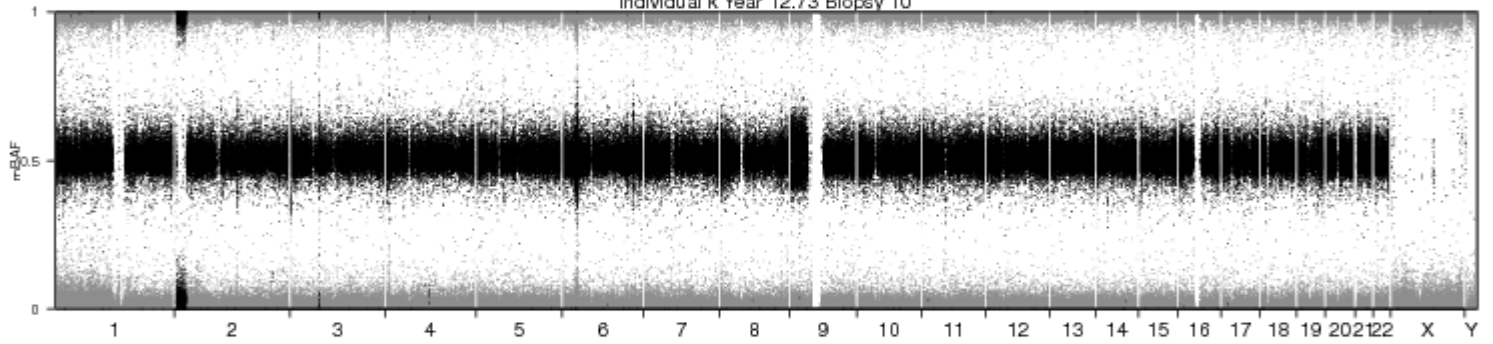

Individual k Year 12.73 Biopsy 10

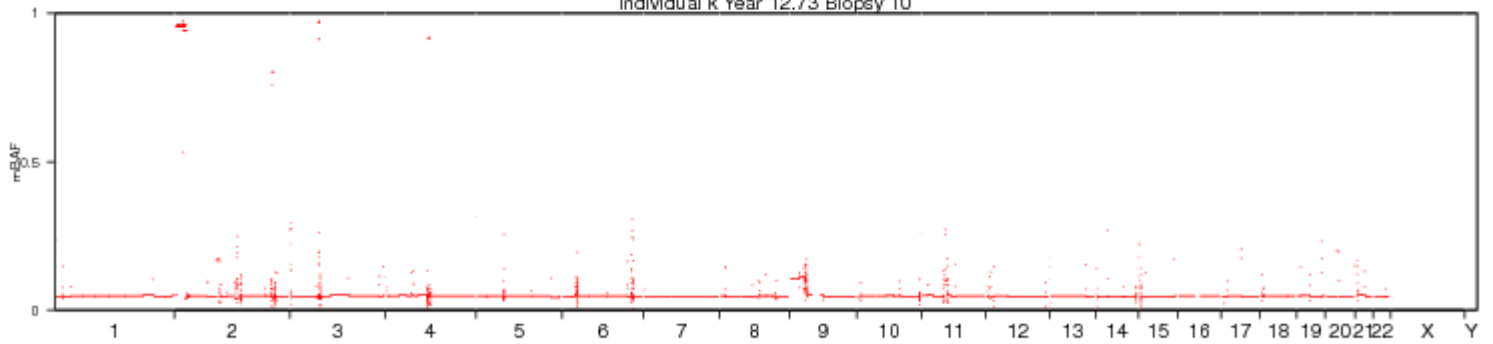

Individual k Year 12.73 Biopsy 10

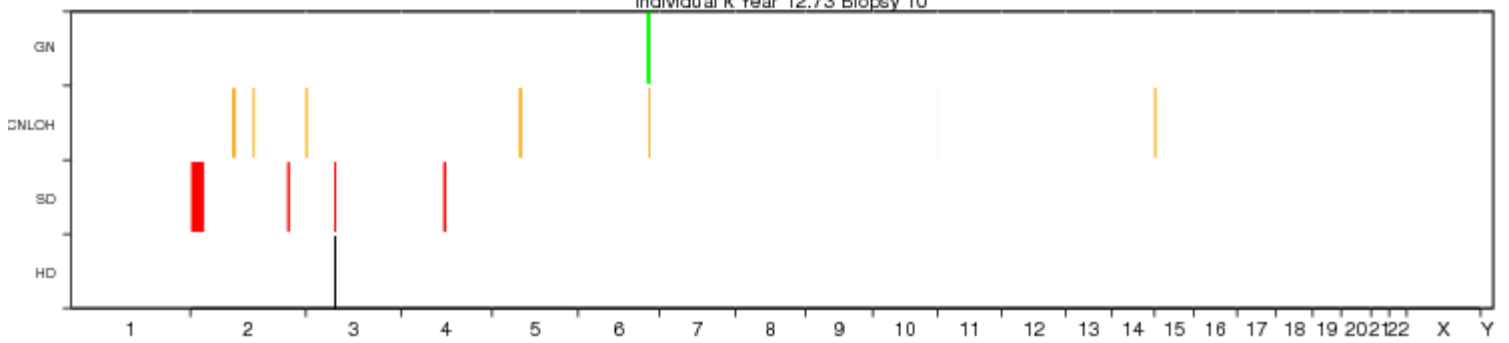

Individual k Year 12.73 Biopsy 11

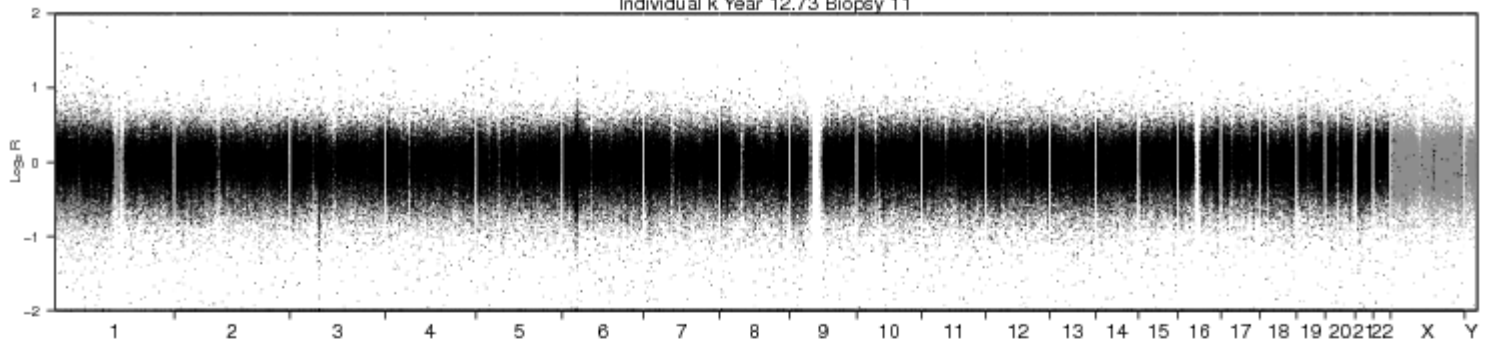

Individual k Year 12.73 Biopsy 11

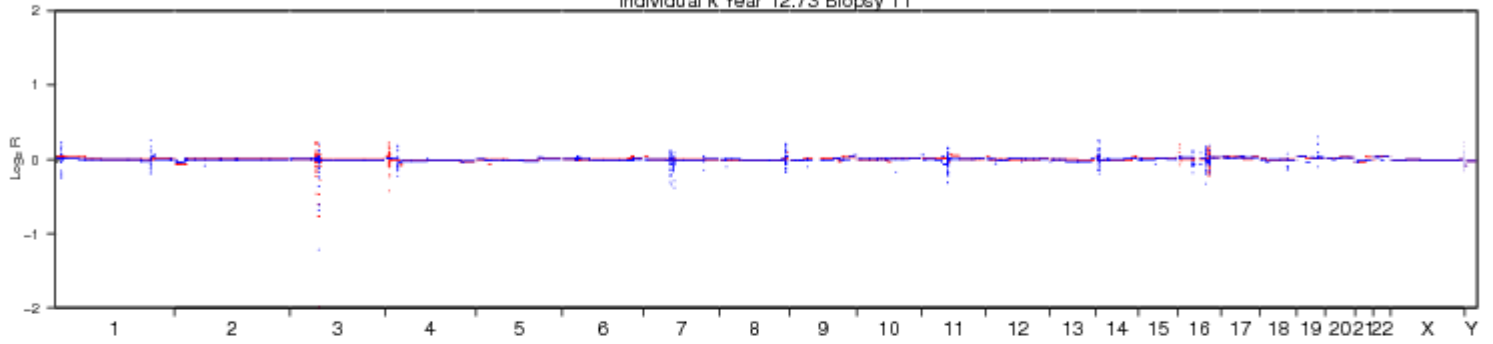

Individual k Year 12.73 Biopsy 11

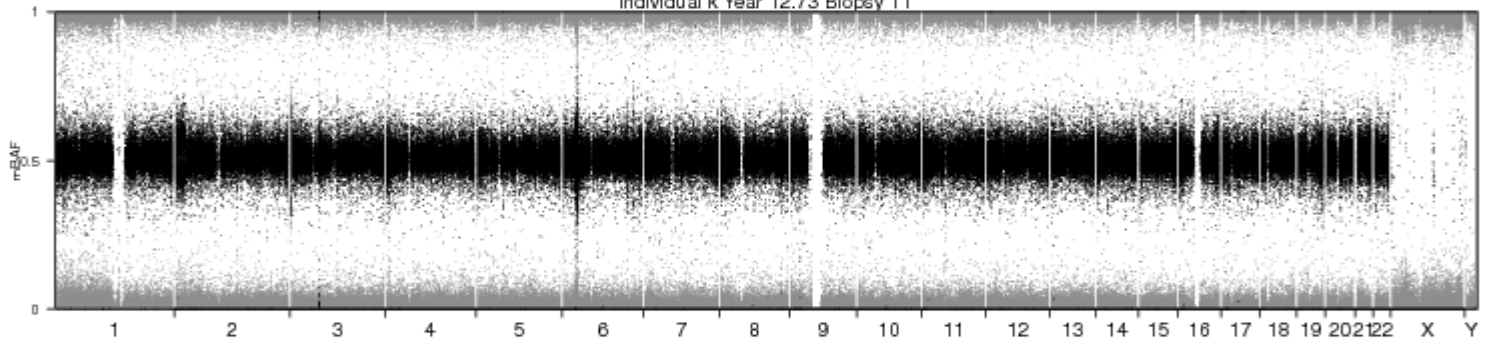

Individual k Year 12.73 Biopsy 11

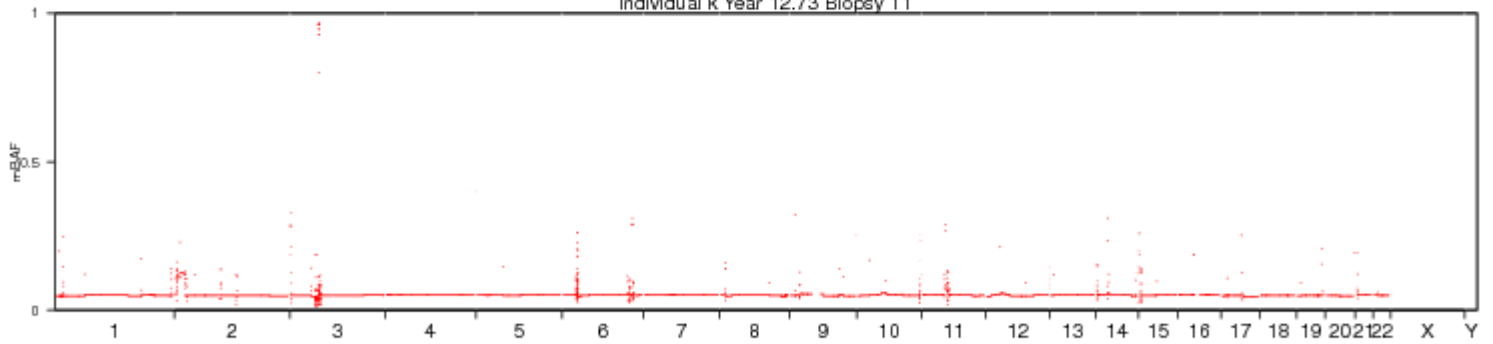

Individual k Year 12.73 Biopsy 11

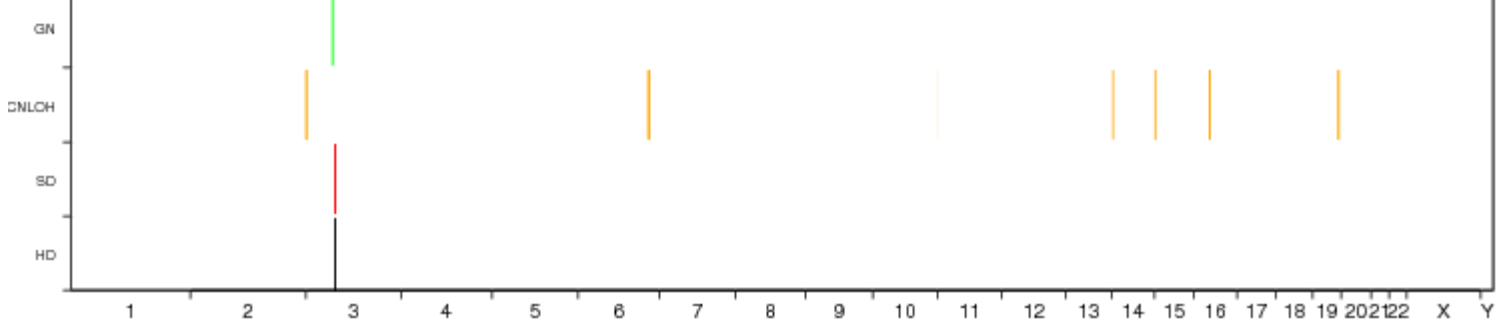

Individual k Year 12.73 Biopsy 12

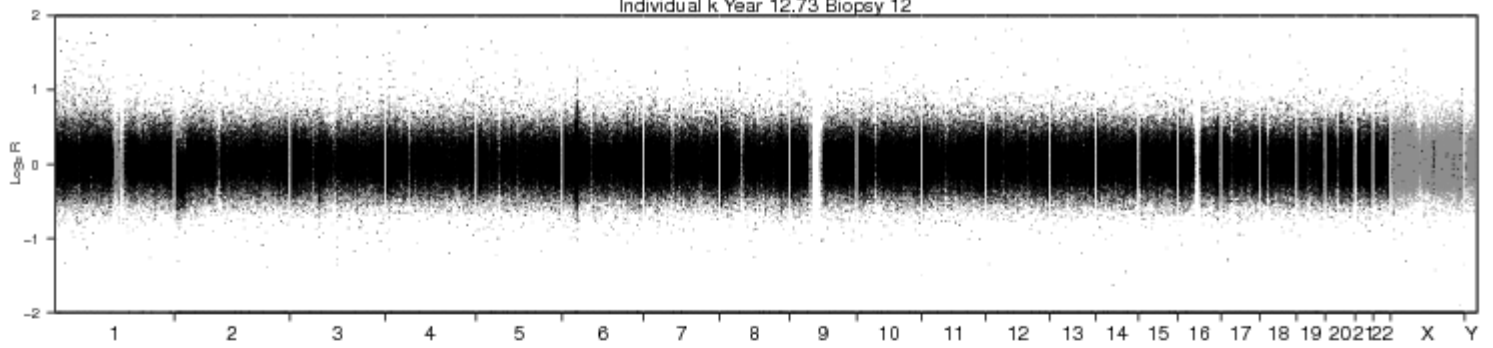

Individual k Year 12.73 Biopsy 12

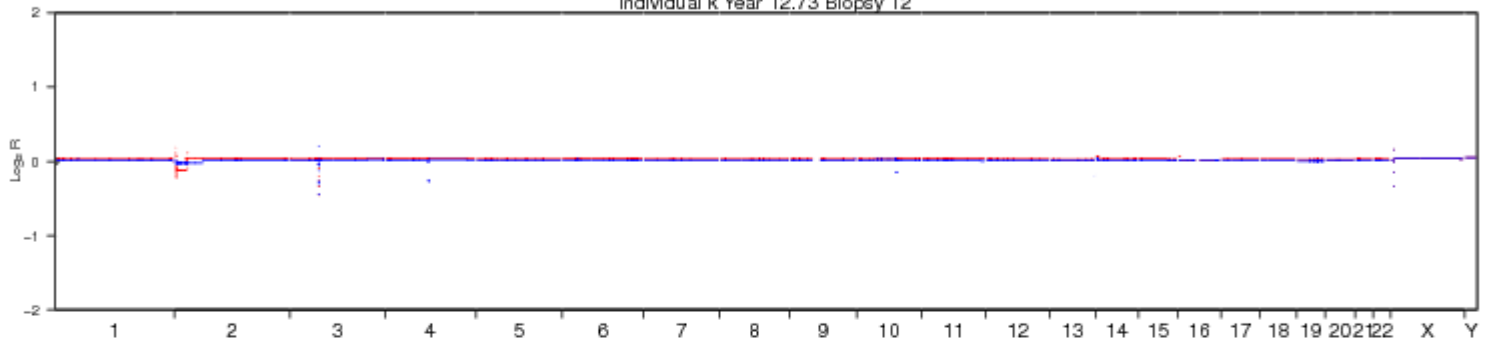

Individual k Year 12.73 Biopsy 12

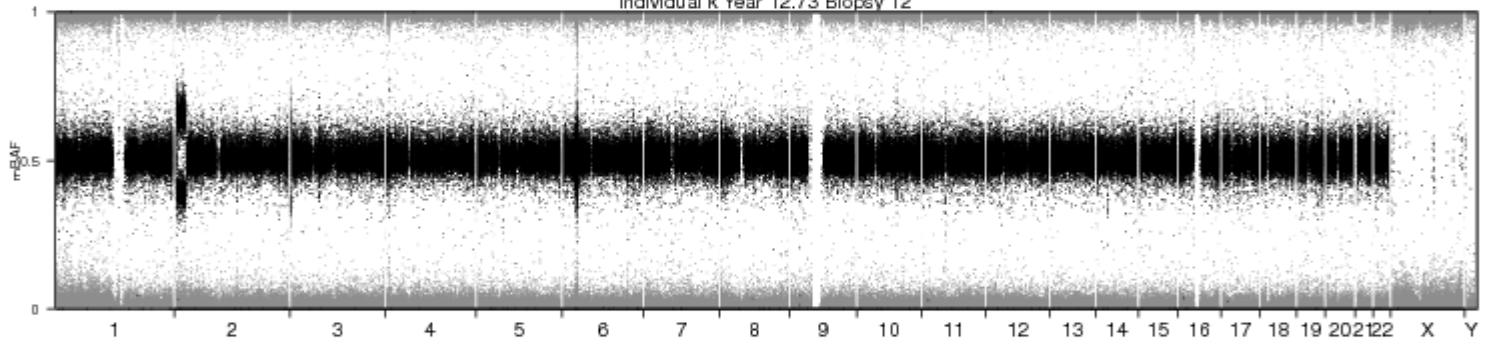

Individual k Year 12.73 Biopsy 12

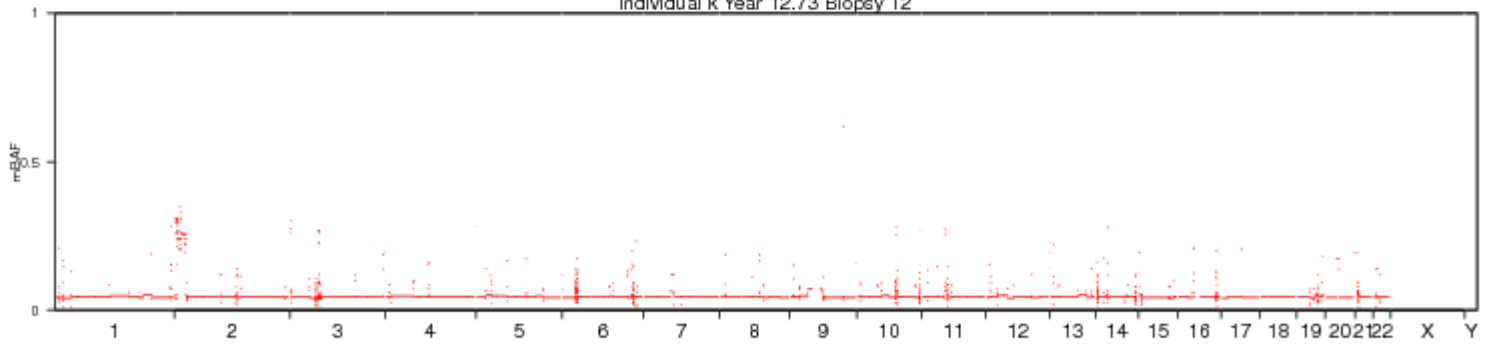

Individual k Year 12.73 Biopsy 12

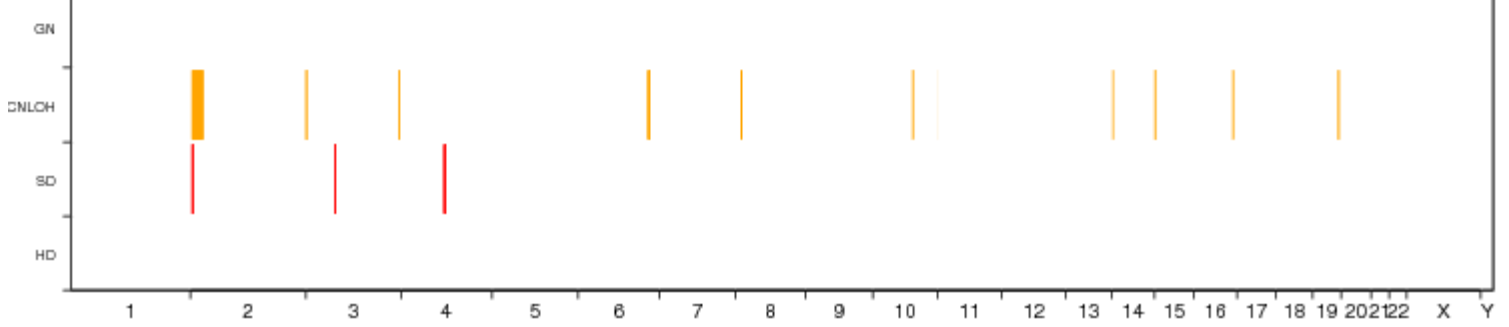

Individual I Year 0 Biopsy 1

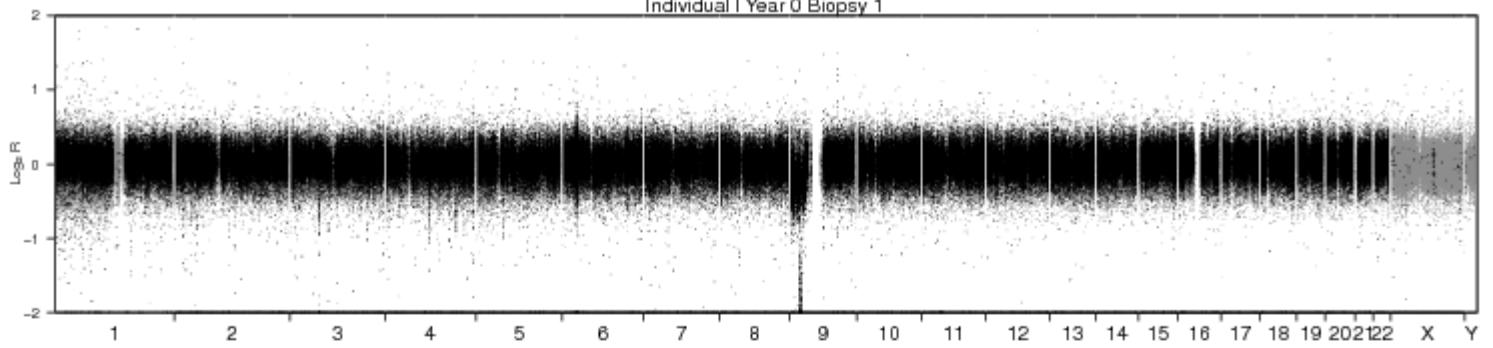

Individual I Year 0 Biopsy 1

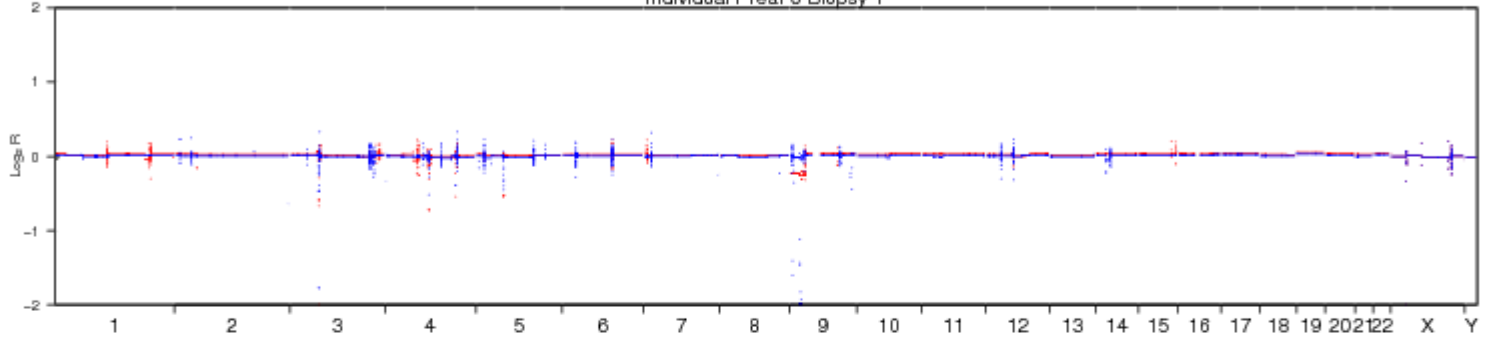

Individual I Year 0 Biopsy 1

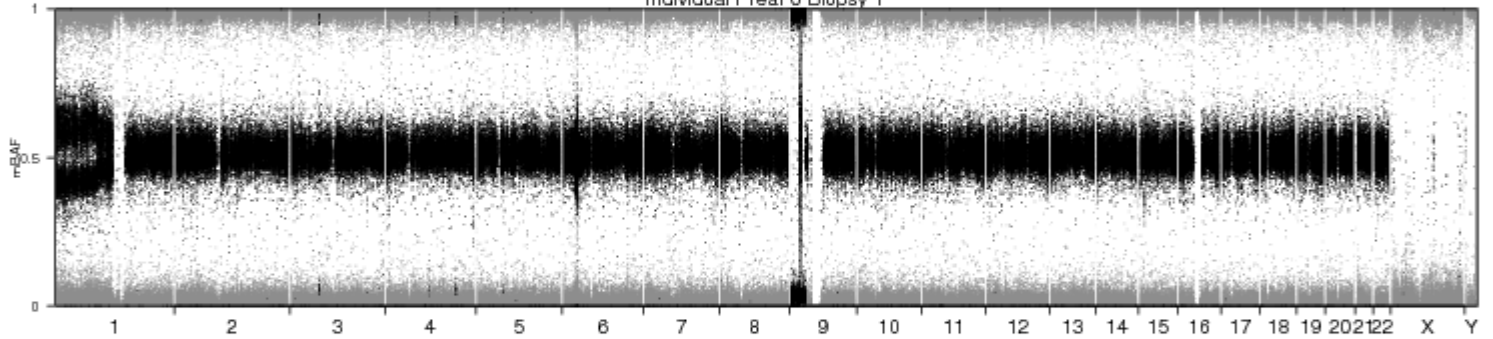

Individual I Year 0 Biopsy 1

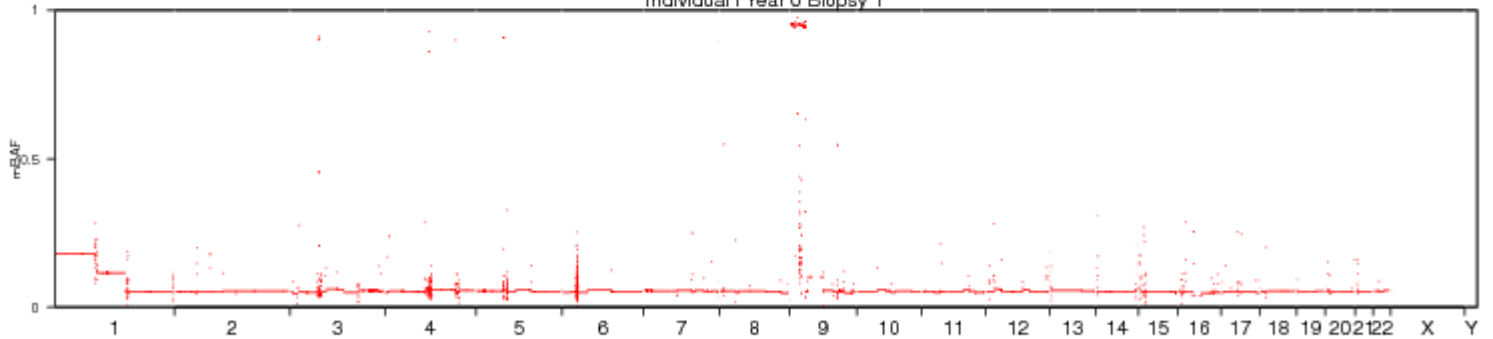

Individual I Year 0 Biopsy 1

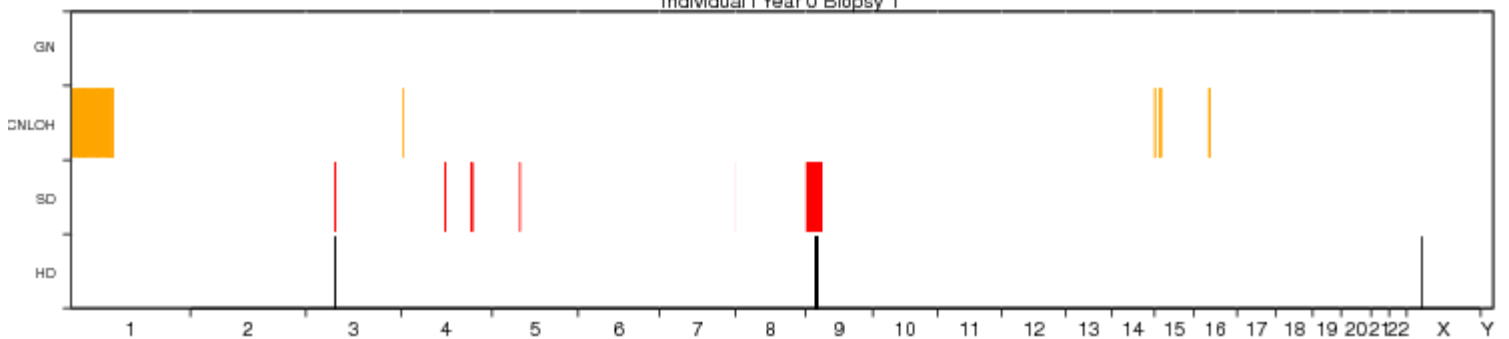



Individual I Year 0 Biopsy 2

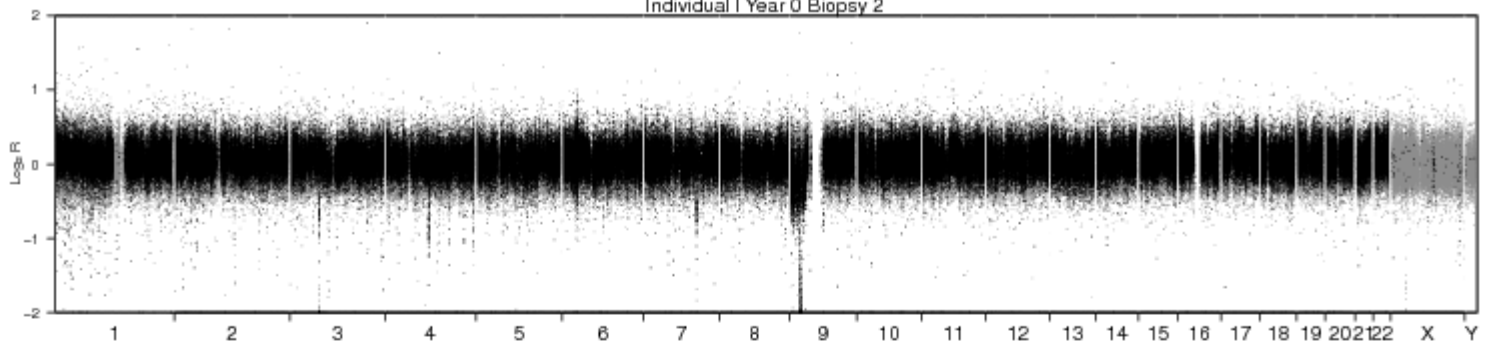

Individual I Year 0 Biopsy 2

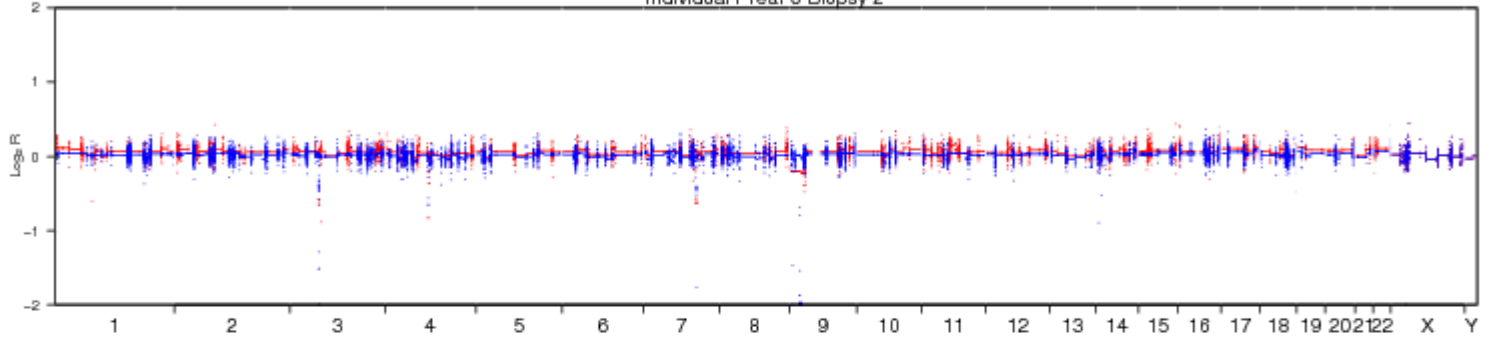

Individual I Year 0 Biopsy 2

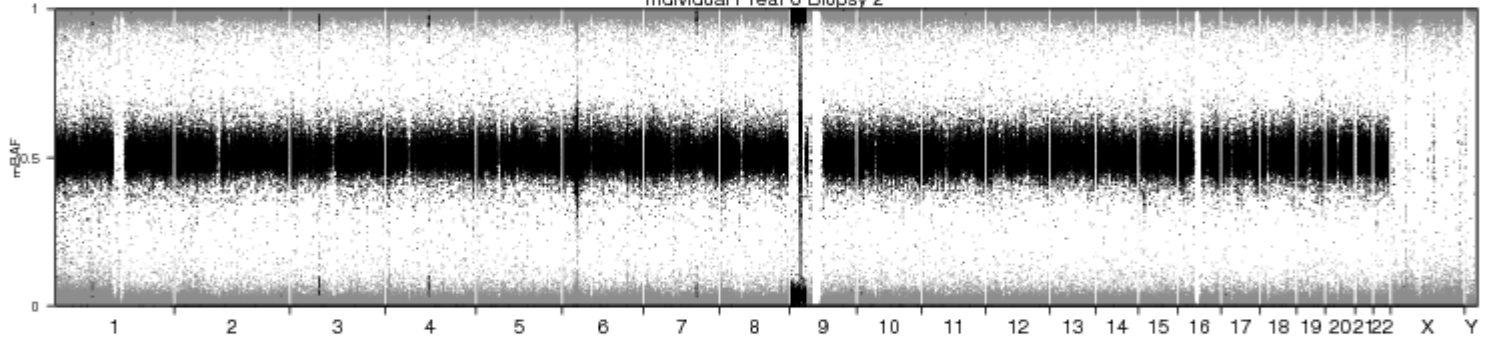

Individual I Year 0 Biopsy 2

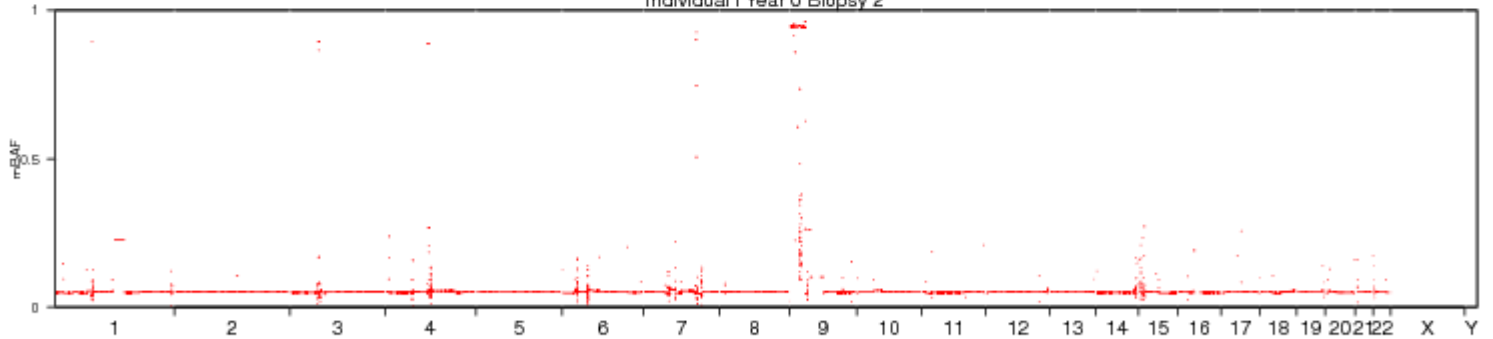

Individual I Year 0 Biopsy 2

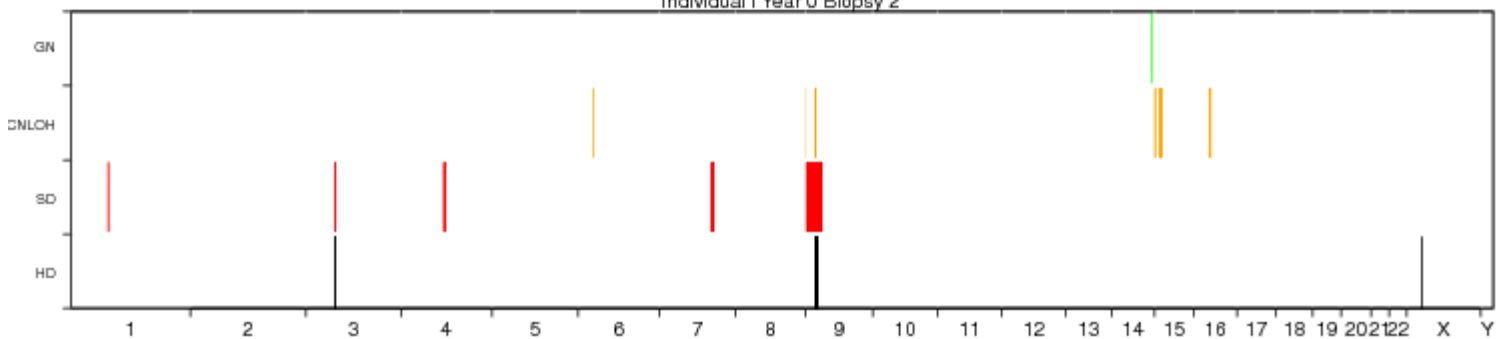

Individual I Year 0 Biopsy 3

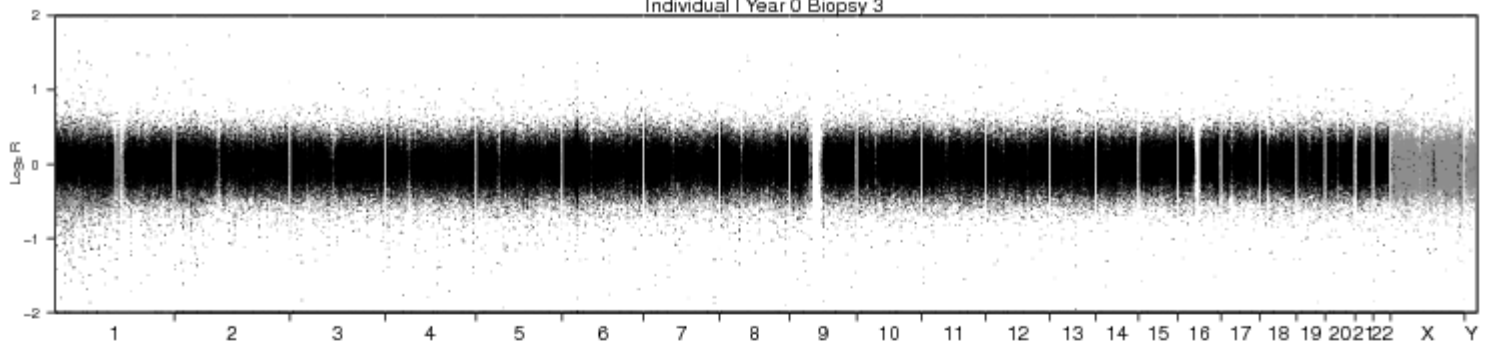

Individual I Year 0 Biopsy 3

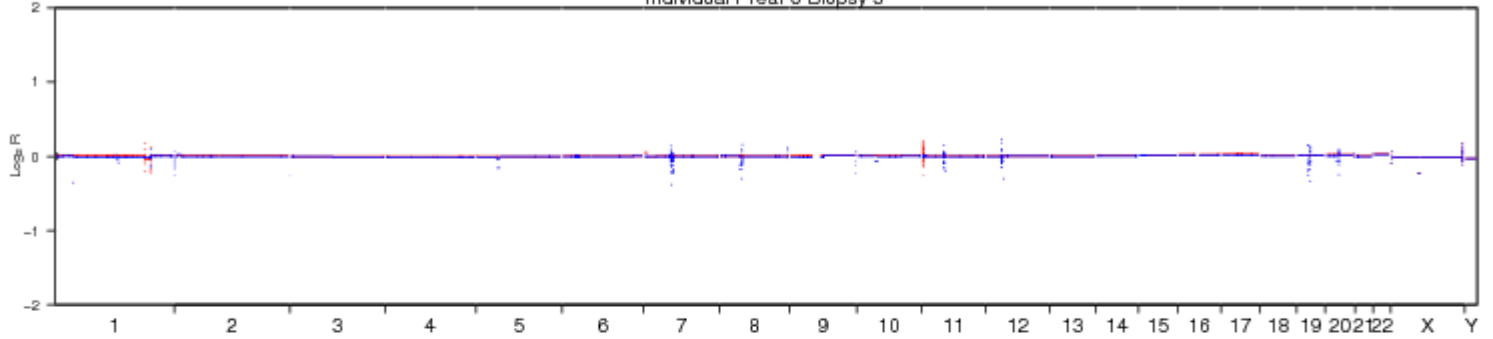

Individual I Year 0 Biopsy 3

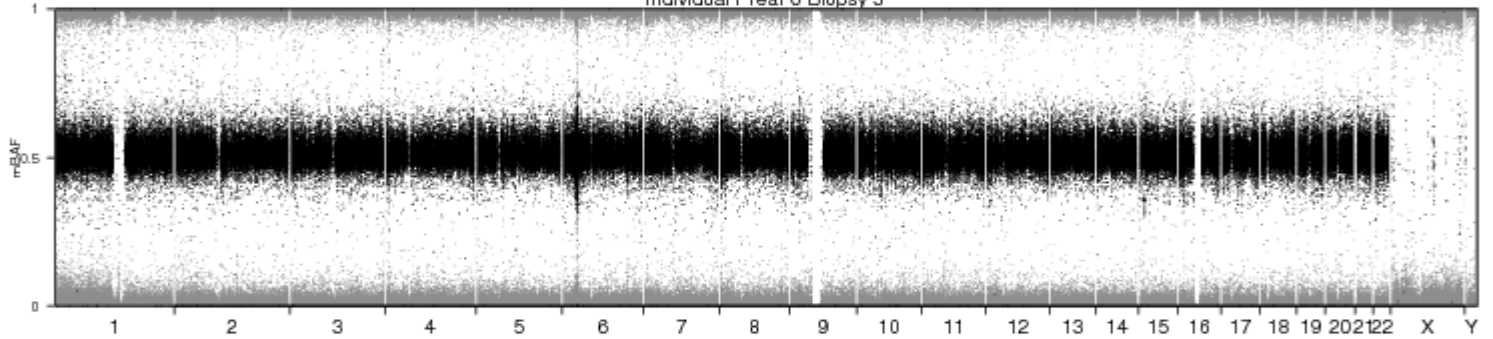

Individual I Year 0 Biopsy 3

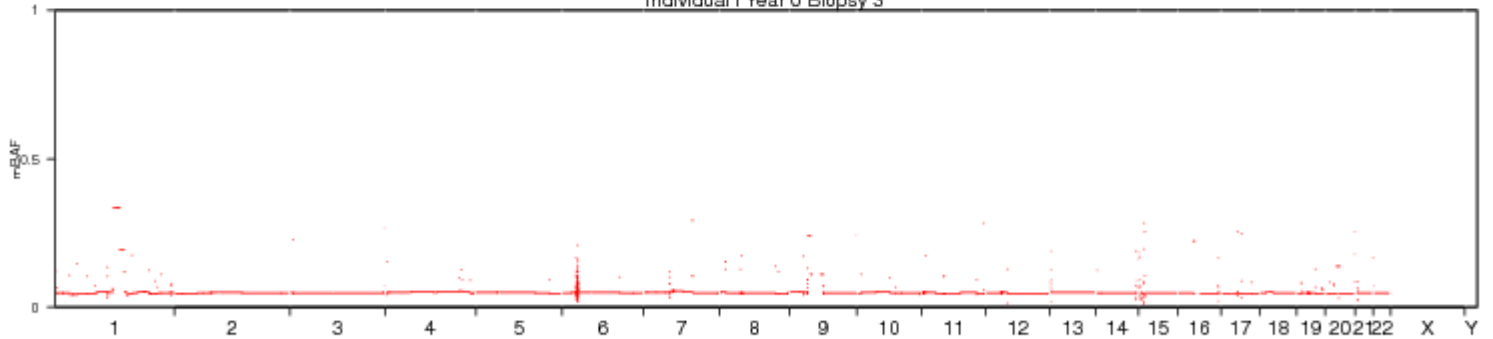

Individual I Year 0 Biopsy 3

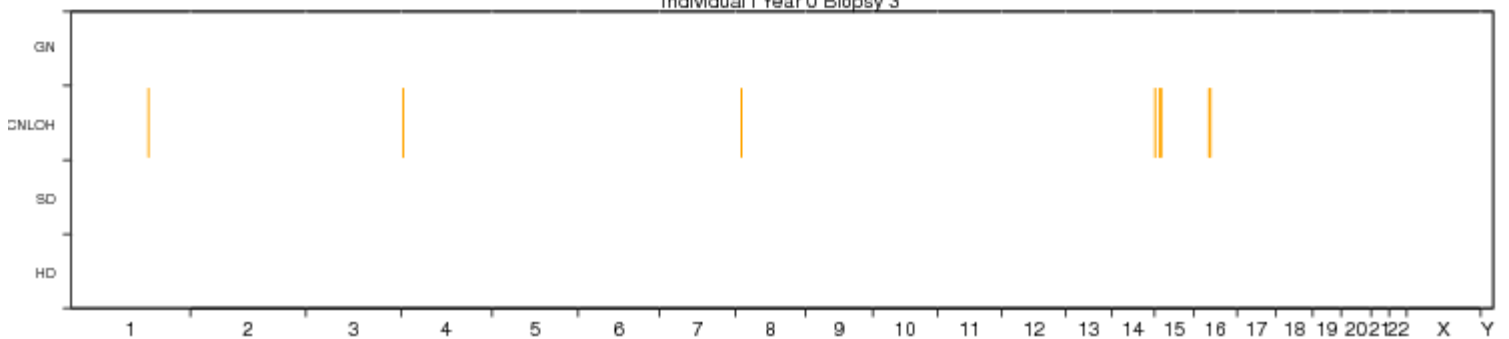

Individual I Year 2.01 Biopsy 4

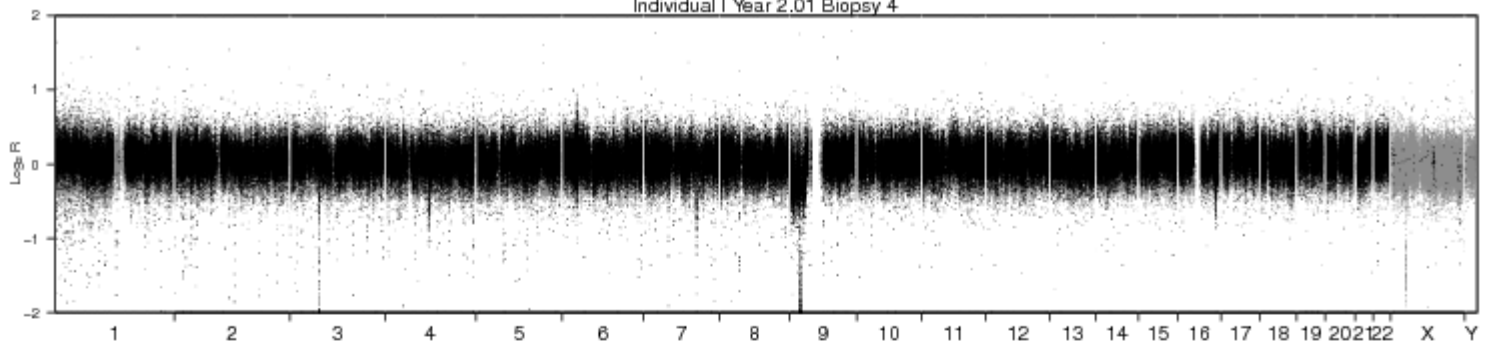

Individual I Year 2.01 Biopsy 4

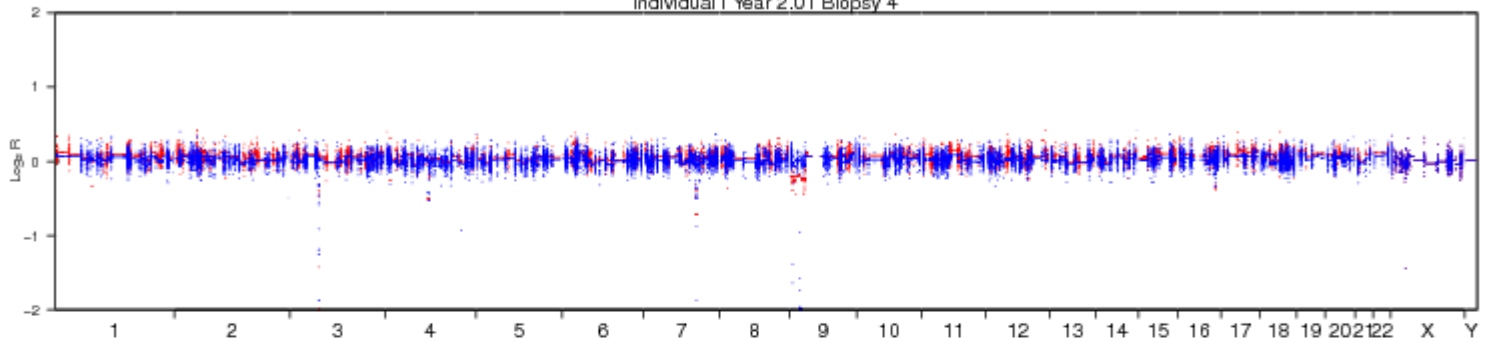

Individual I Year 2.01 Biopsy 4

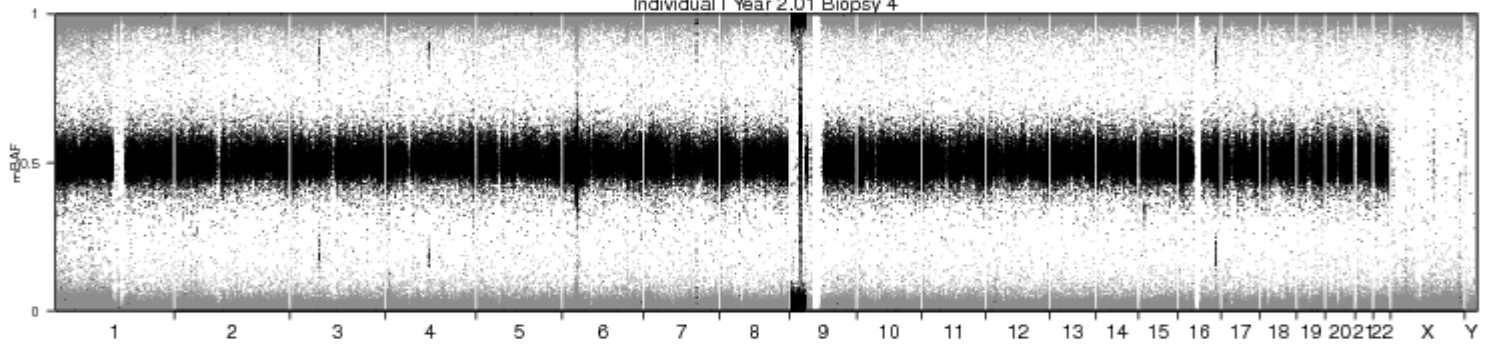

Individual I Year 2.01 Biopsy 4

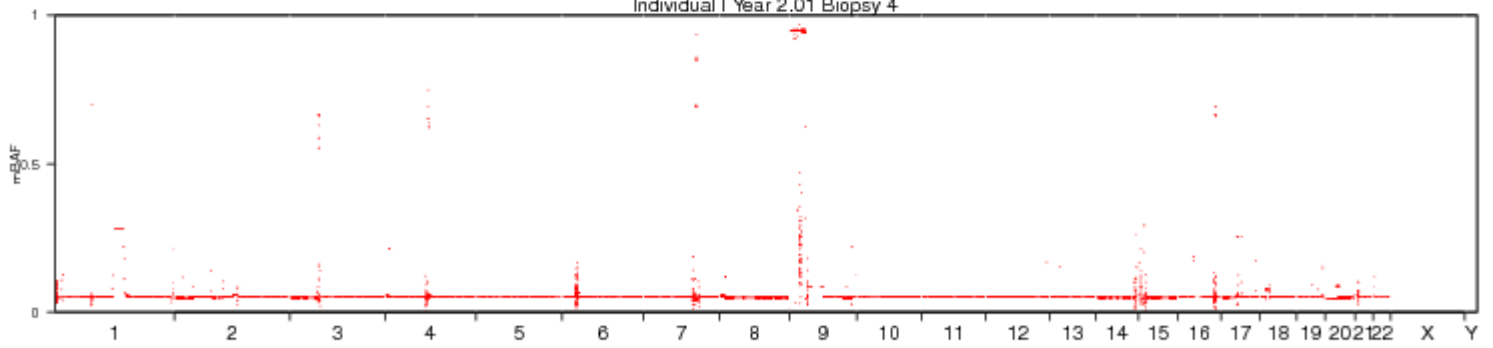

Individual I Year 2.01 Biopsy 4

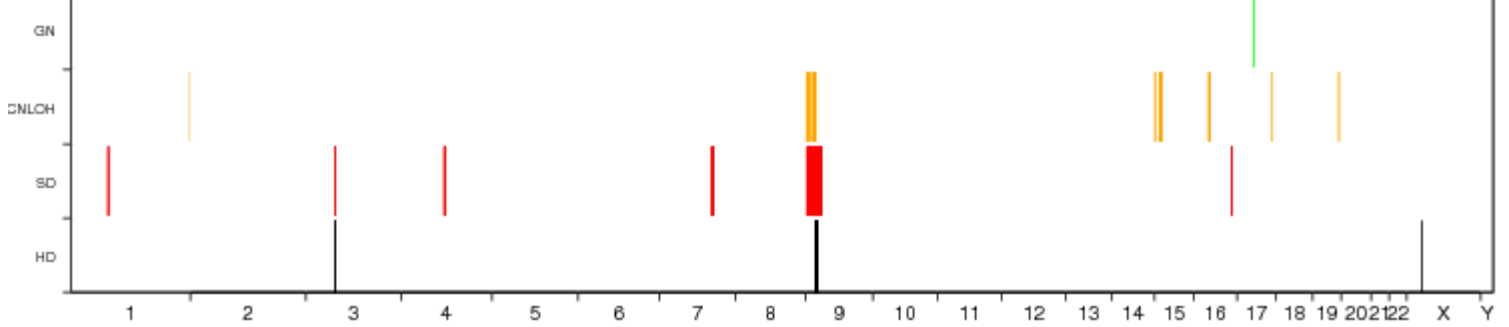

Individual I Year 2.01 Biopsy 5

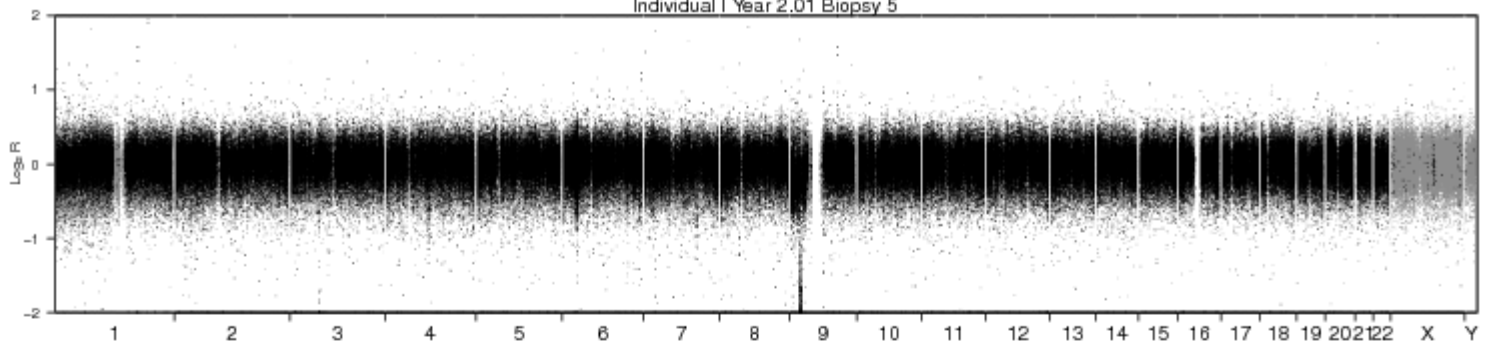

Individual I Year 2.01 Biopsy 5

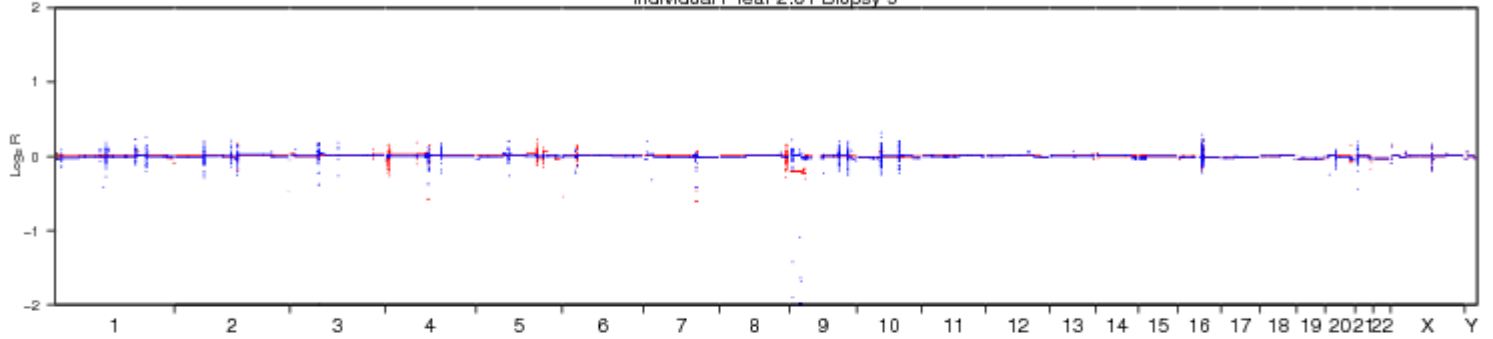

Individual I Year 2.01 Biopsy 5

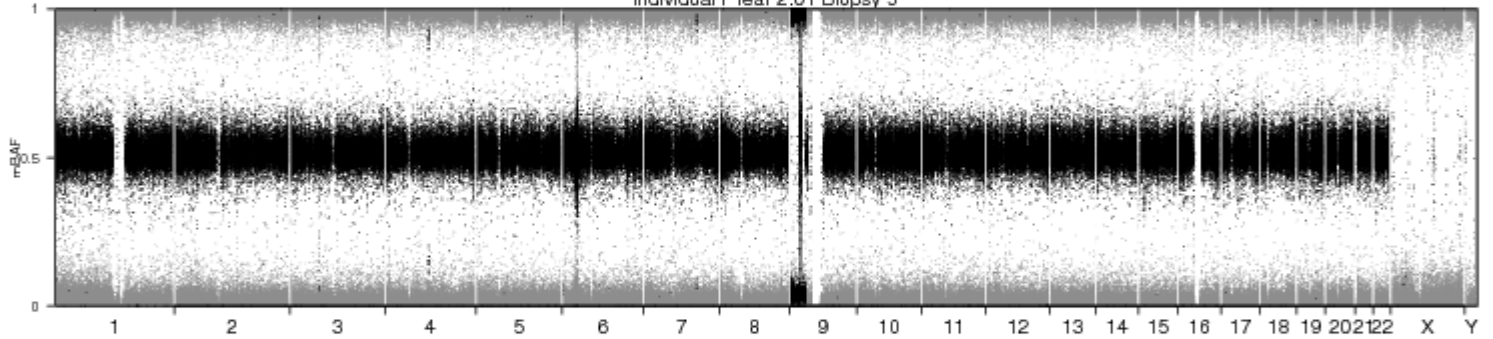

Individual I Year 2.01 Biopsy 5

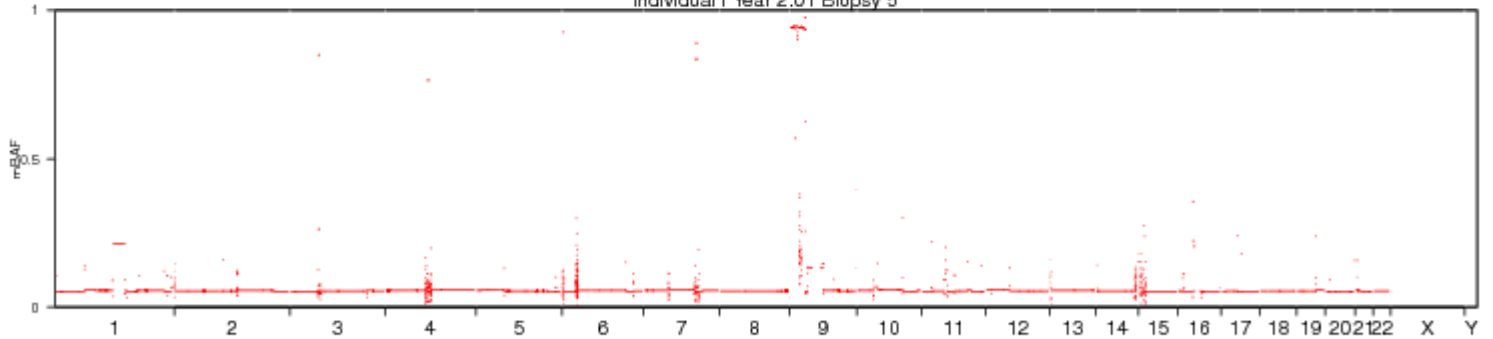

Individual I Year 2.01 Biopsy 5

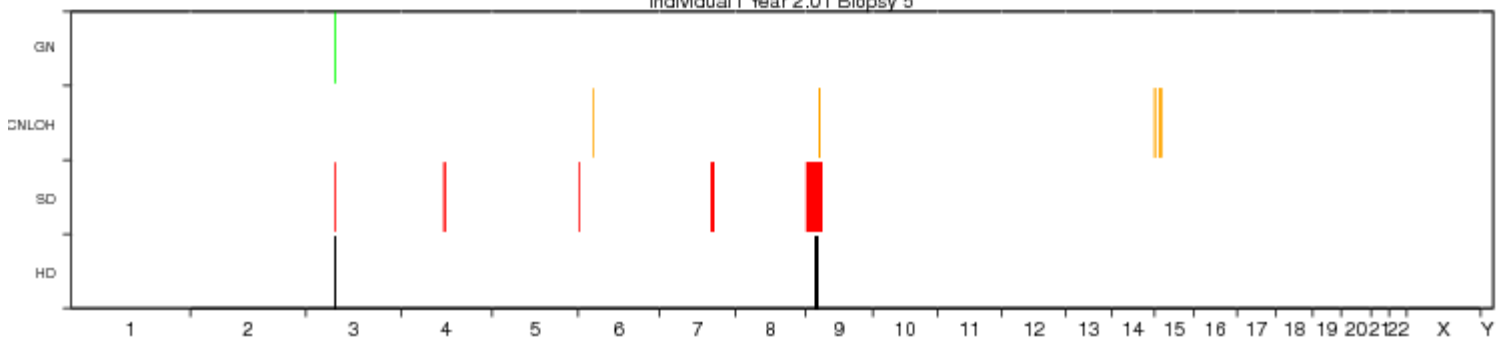



Individual I Year 2.01 Biopsy 6

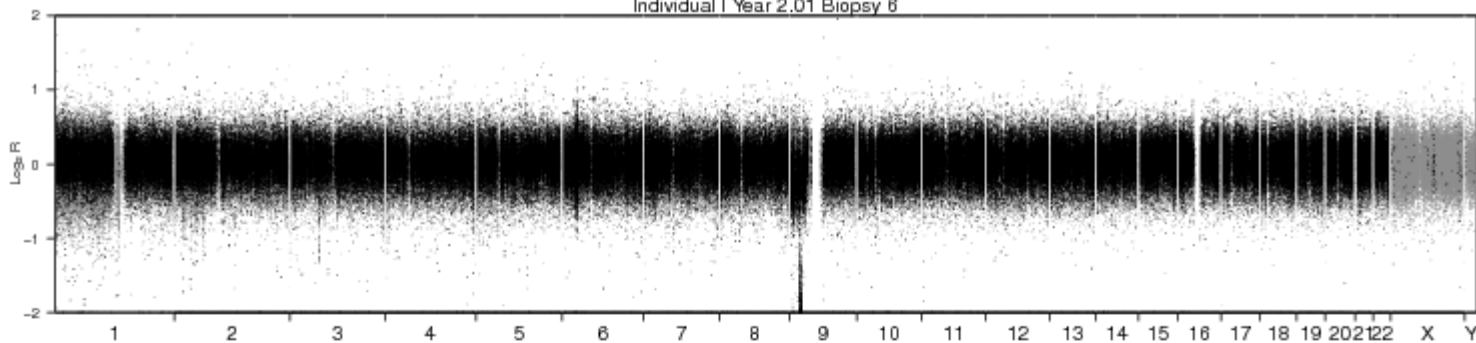

Individual I Year 2.01 Biopsy 6

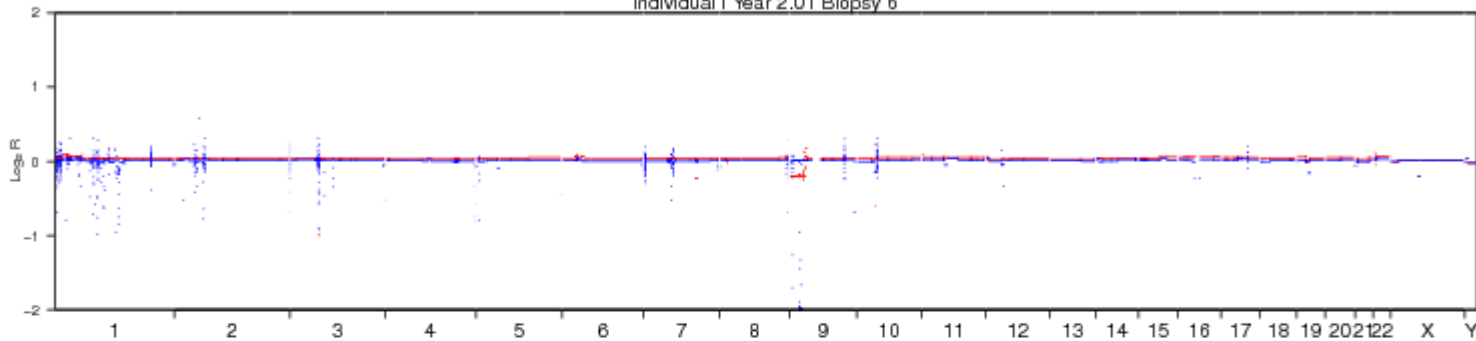

Individual I Year 2.01 Biopsy 6

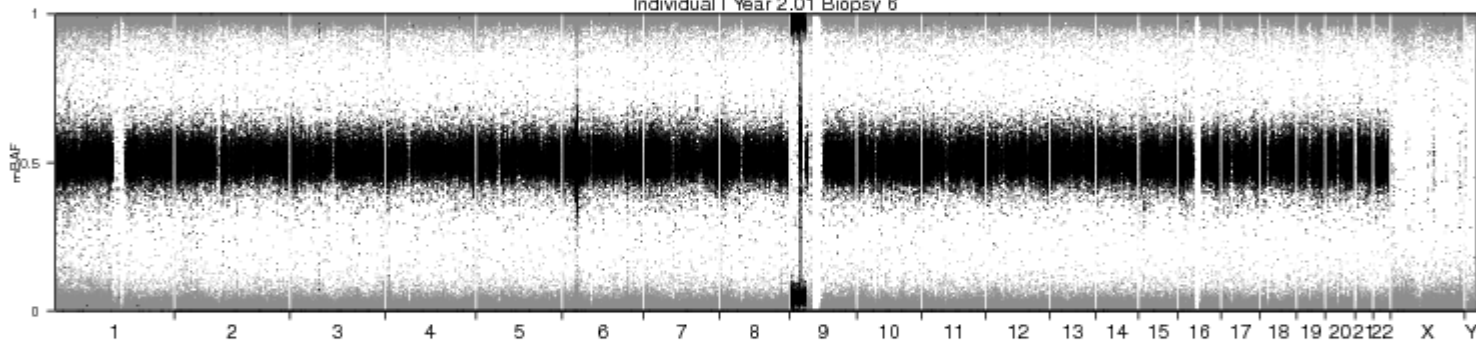

Individual I Year 2.01 Biopsy 6

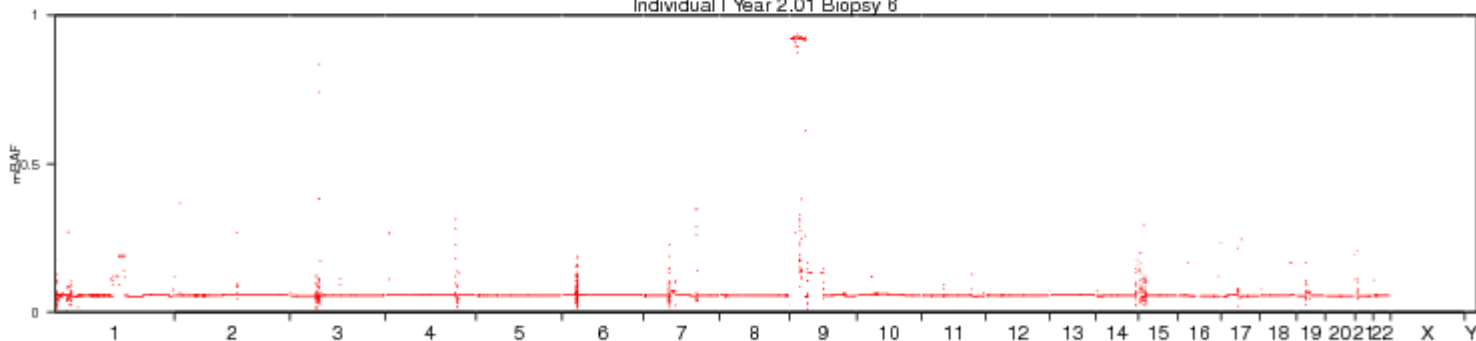

Individual I Year 2.01 Biopsy 6

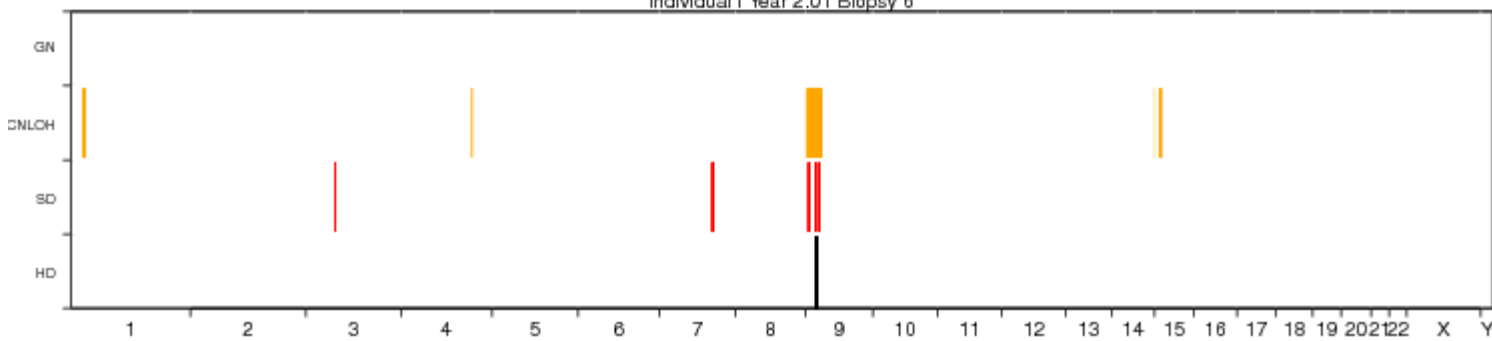

Individual I Year 2.71 Biopsy 7

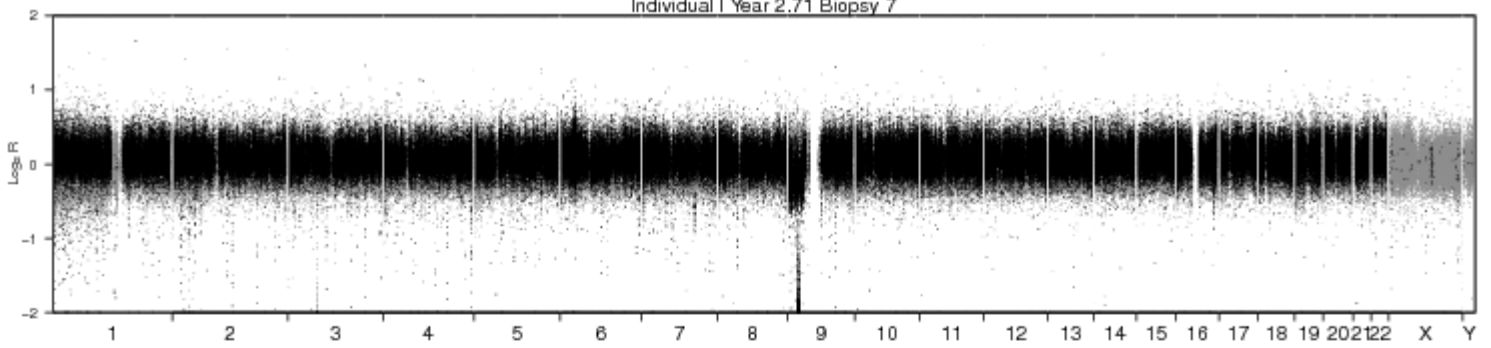

Individual I Year 2.71 Biopsy 7

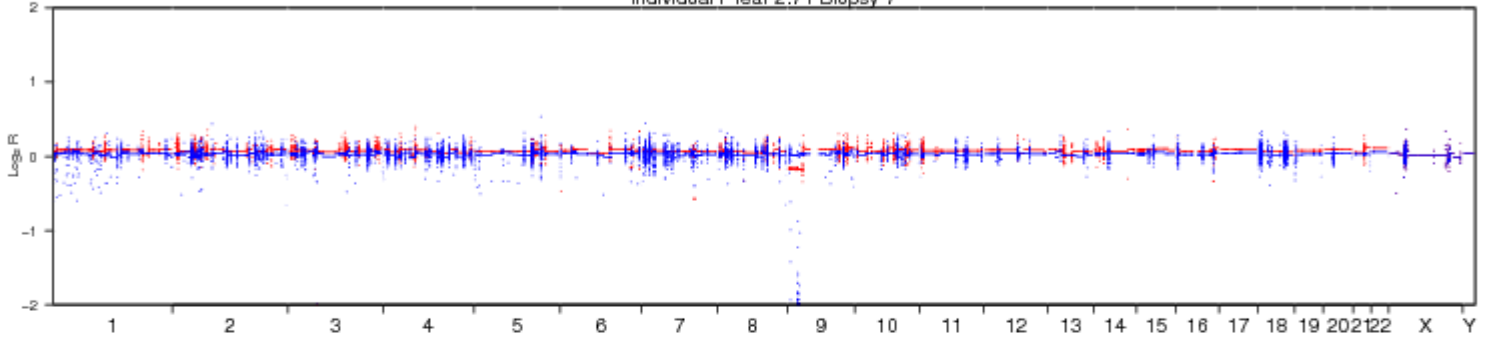

Individual I Year 2.71 Biopsy 7

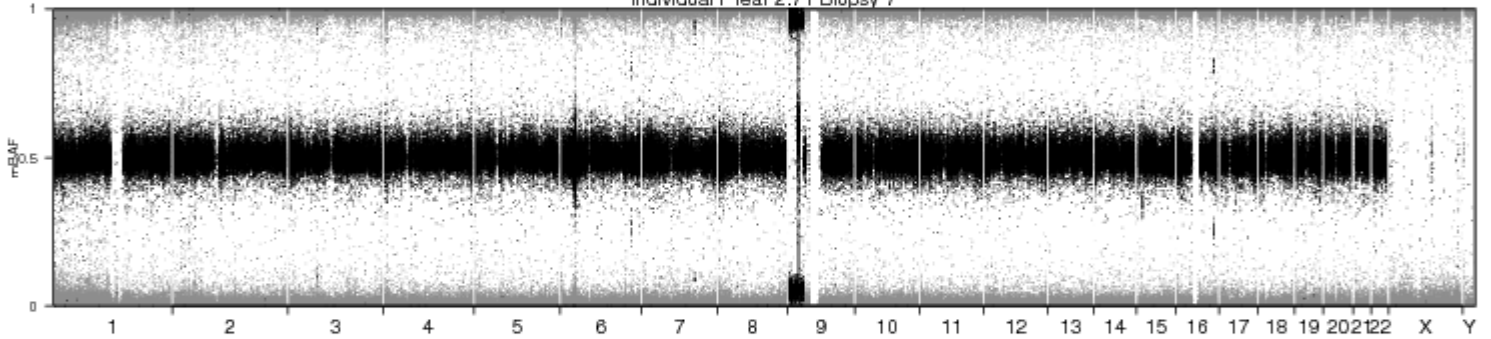

Individual I Year 2.71 Biopsy 7

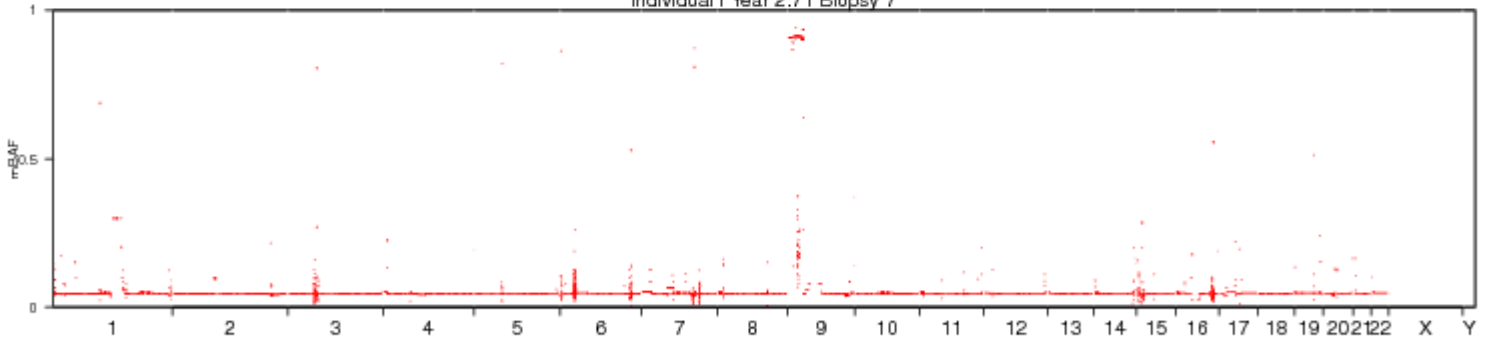

Individual I Year 2.71 Biopsy 7

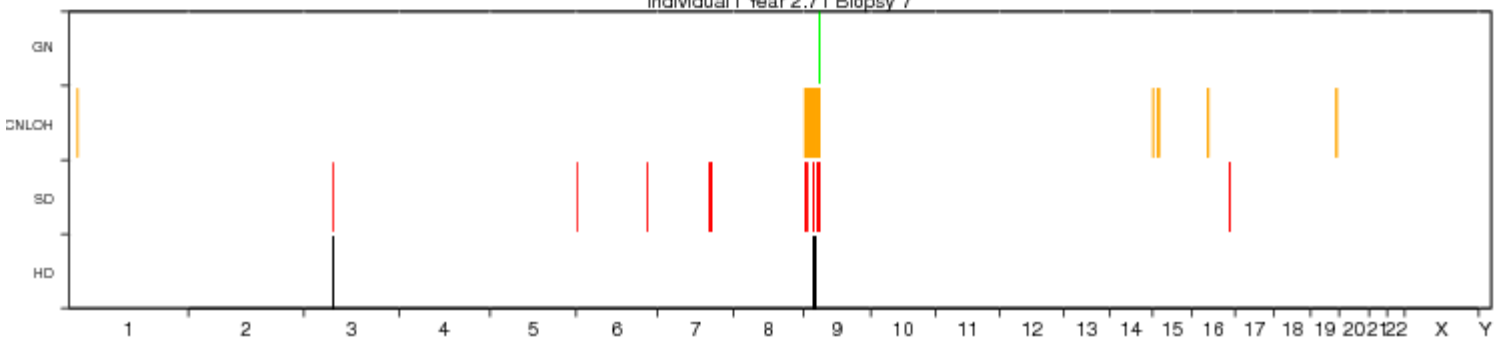

Individual I Year 2.71 Biopsy 8

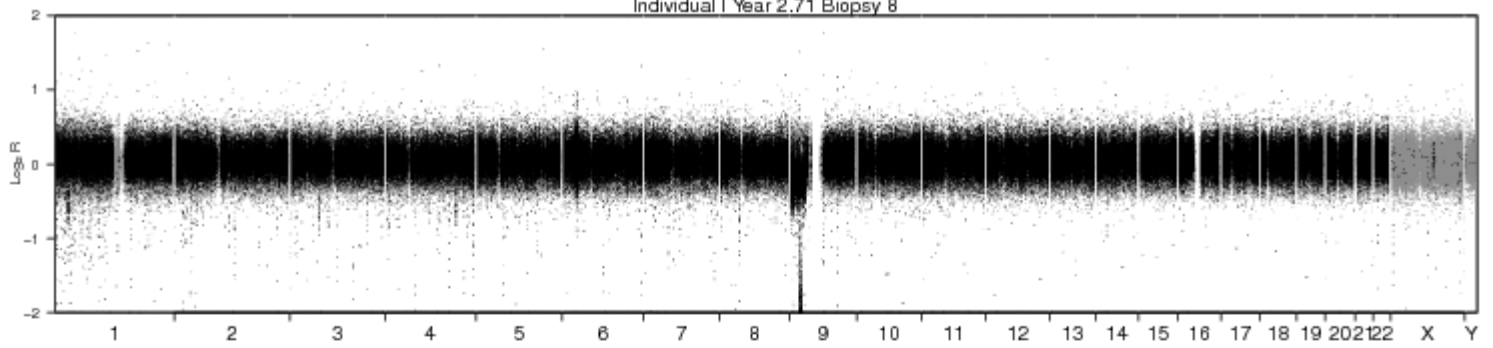

Individual I Year 2.71 Biopsy 8

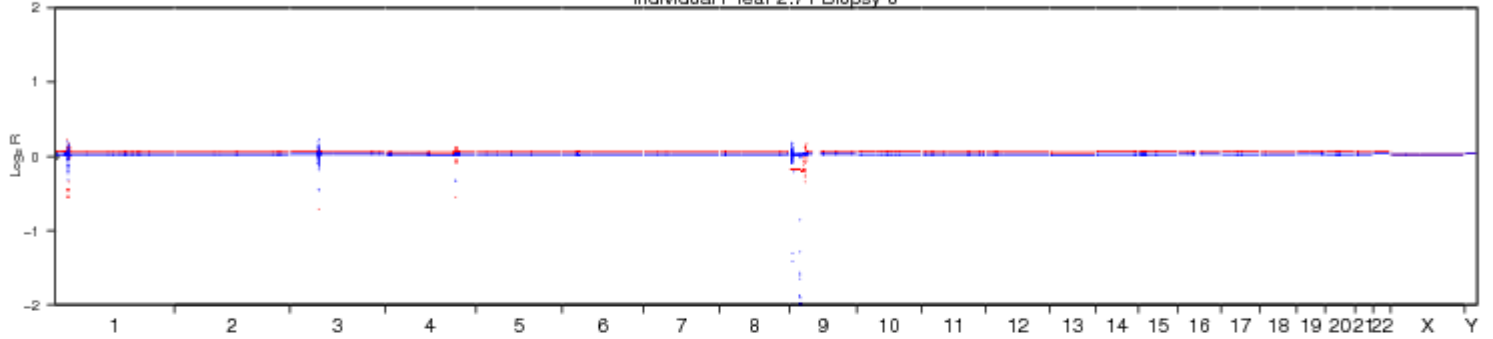

Individual I Year 2.71 Biopsy 8

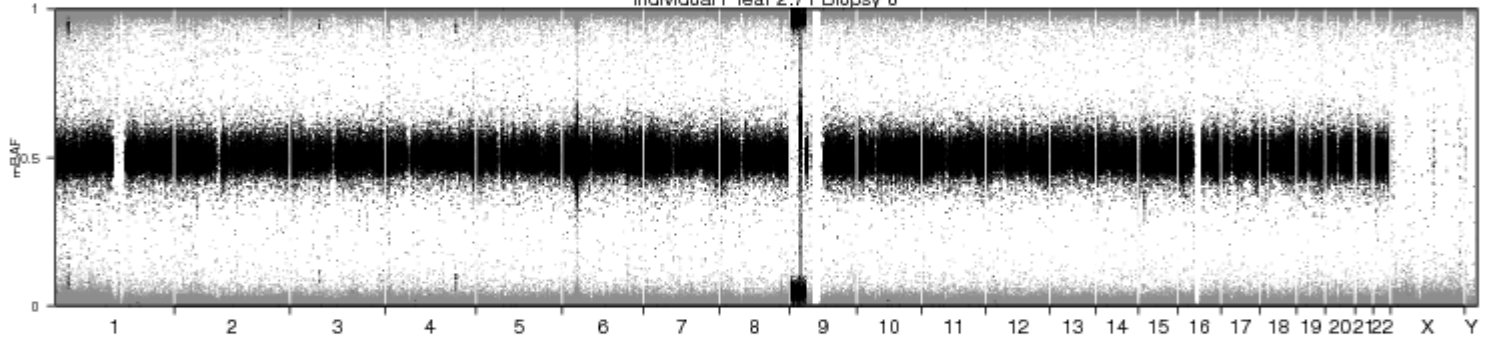

Individual I Year 2.71 Biopsy 8

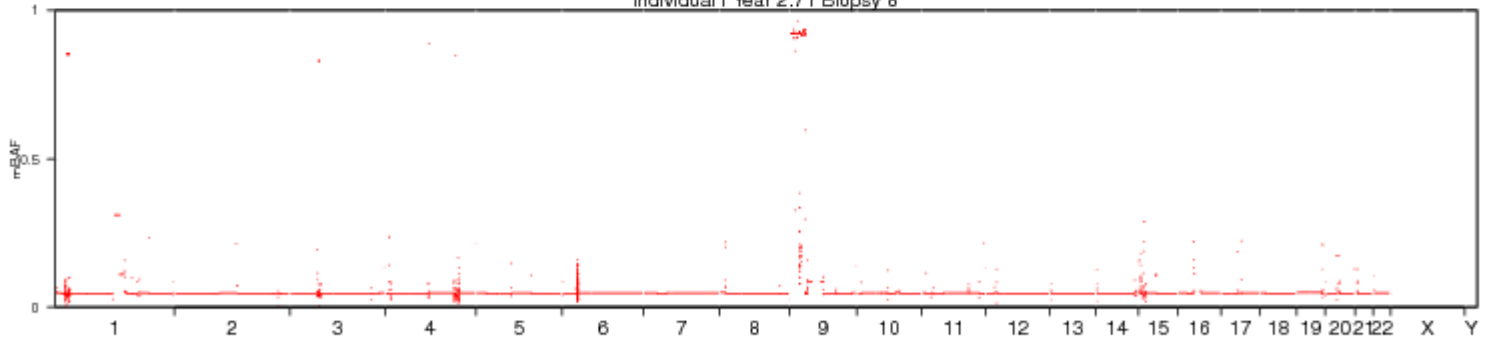

Individual I Year 2.71 Biopsy 8

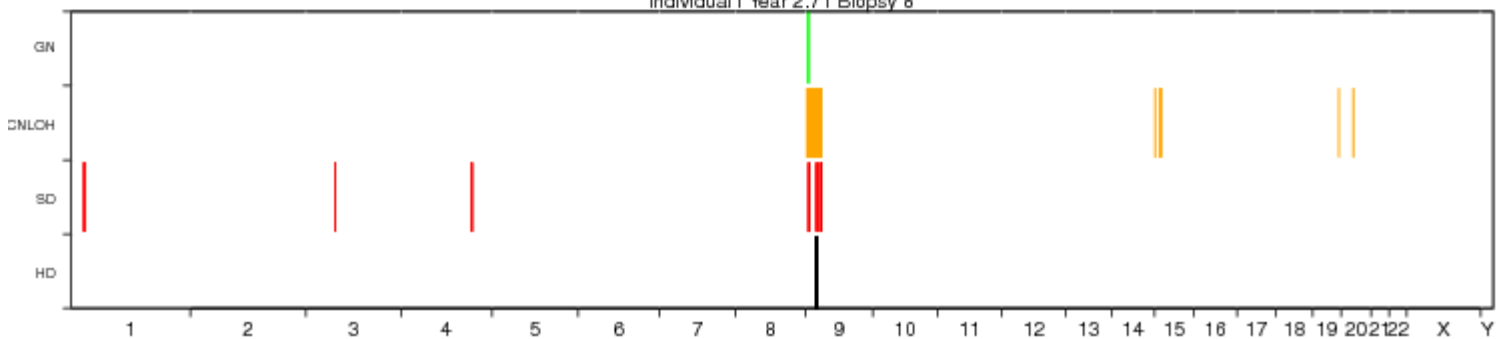

Individual I Year 6.31 Biopsy 9

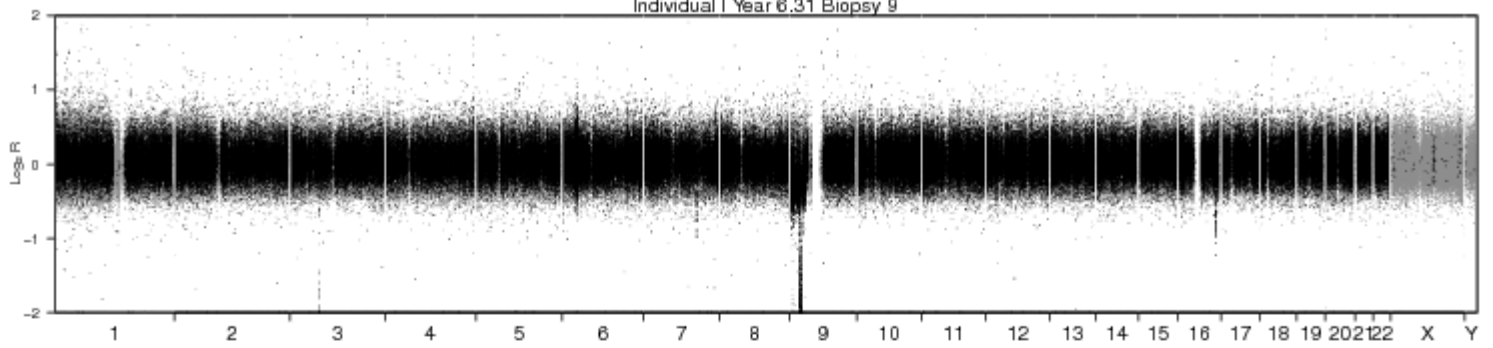

Individual I Year 6.31 Biopsy 9

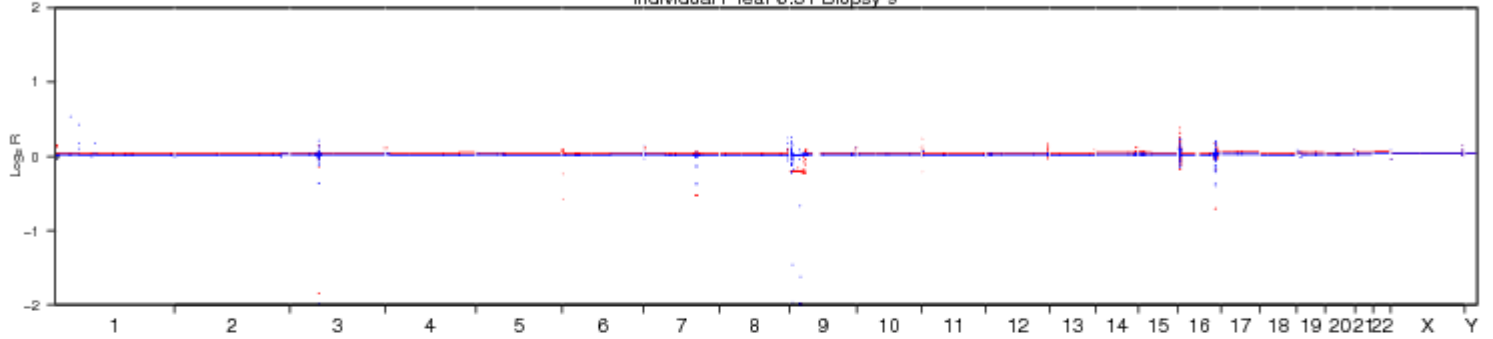

Individual I Year 6.31 Biopsy 9

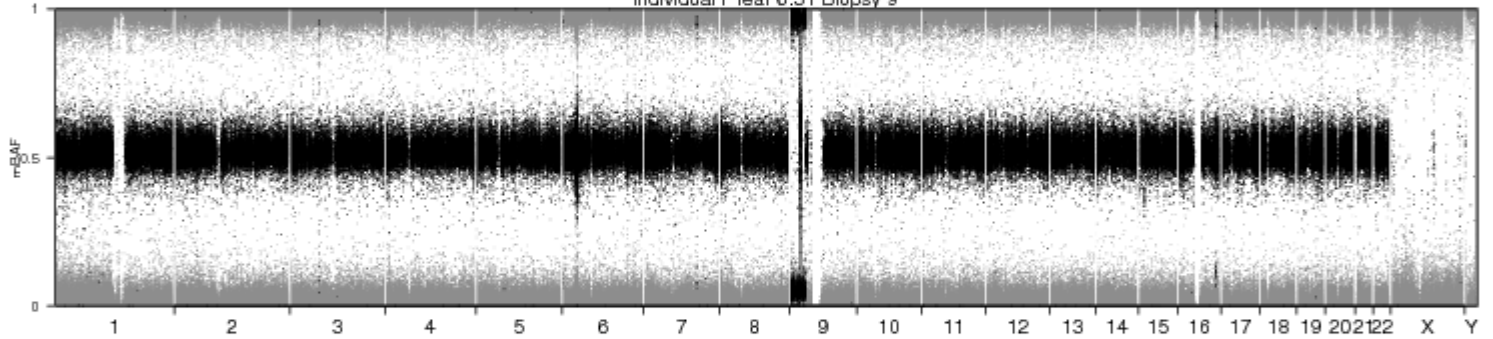

Individual I Year 6.31 Biopsy 9

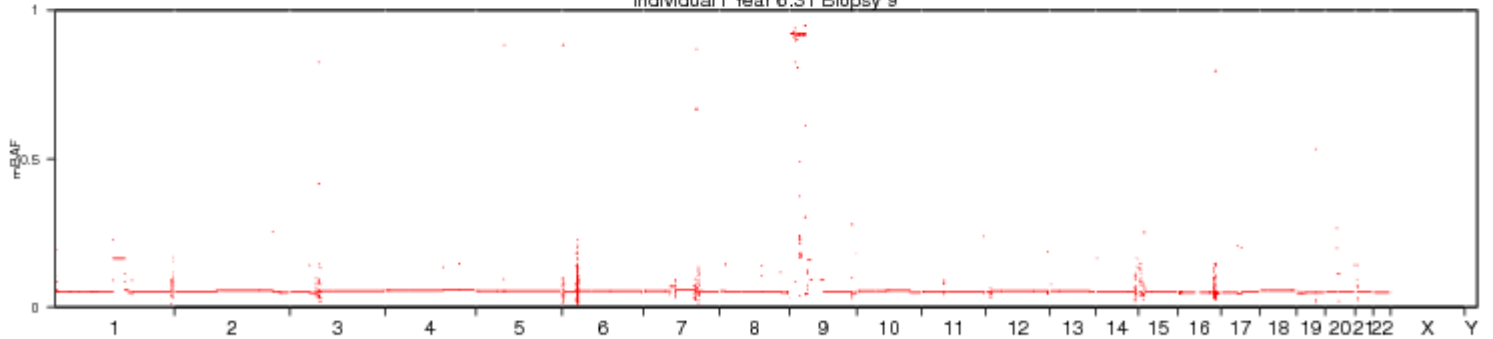

Individual I Year 6.31 Biopsy 9

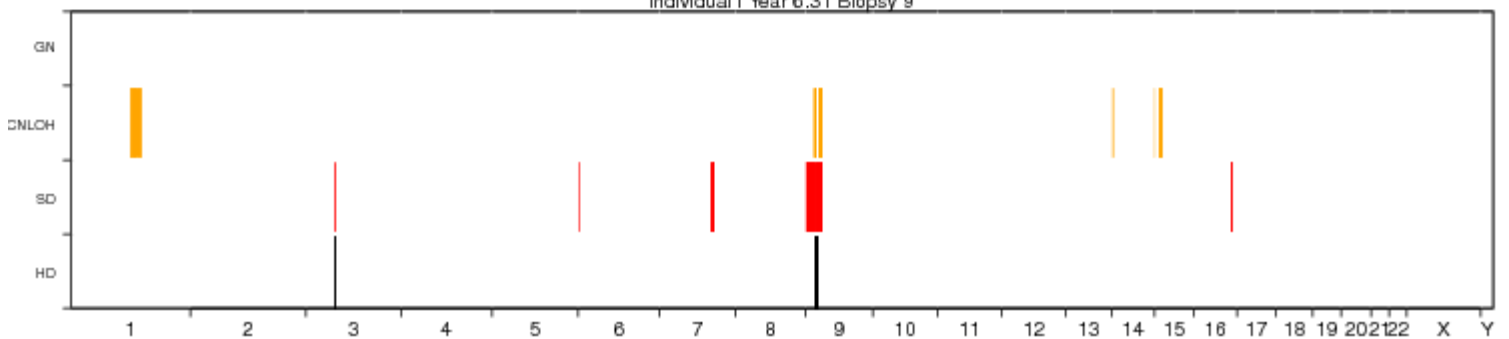



Individual I Year 6.31 Biopsy 10

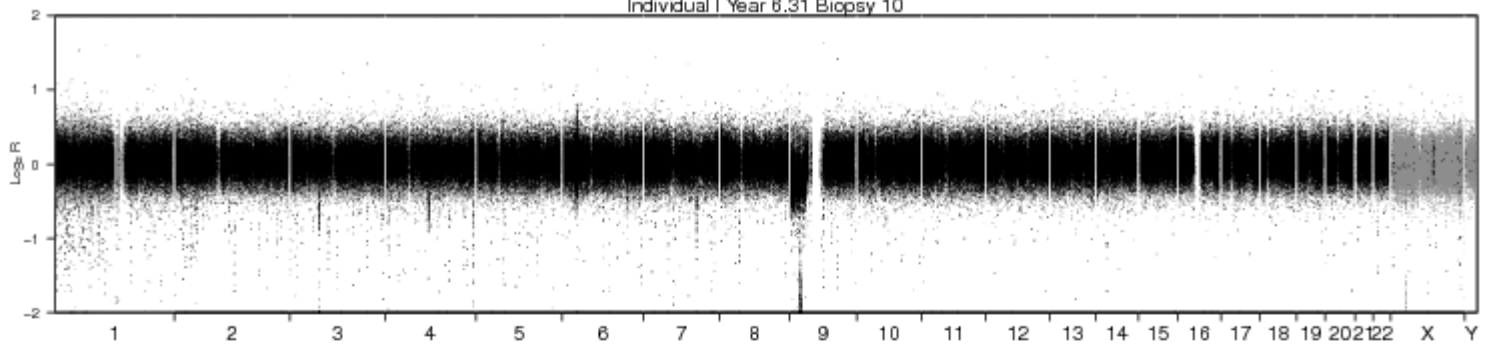

Individual I Year 6.31 Biopsy 10

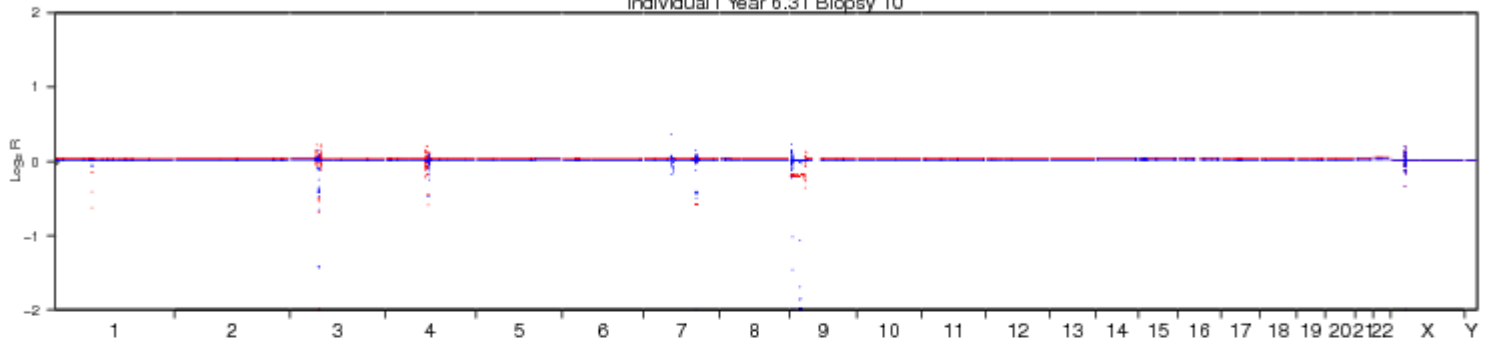

Individual I Year 6.31 Biopsy 10

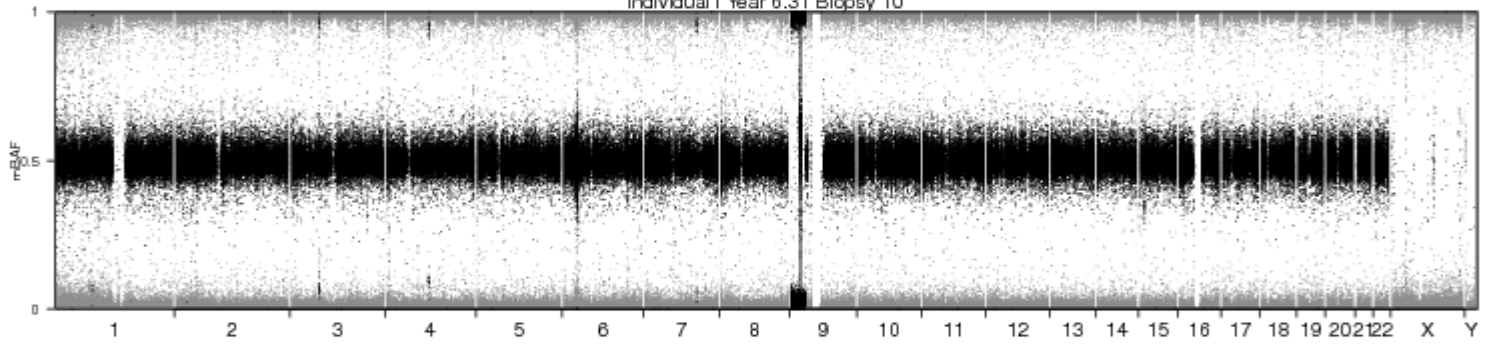

Individual I Year 6.31 Biopsy 10

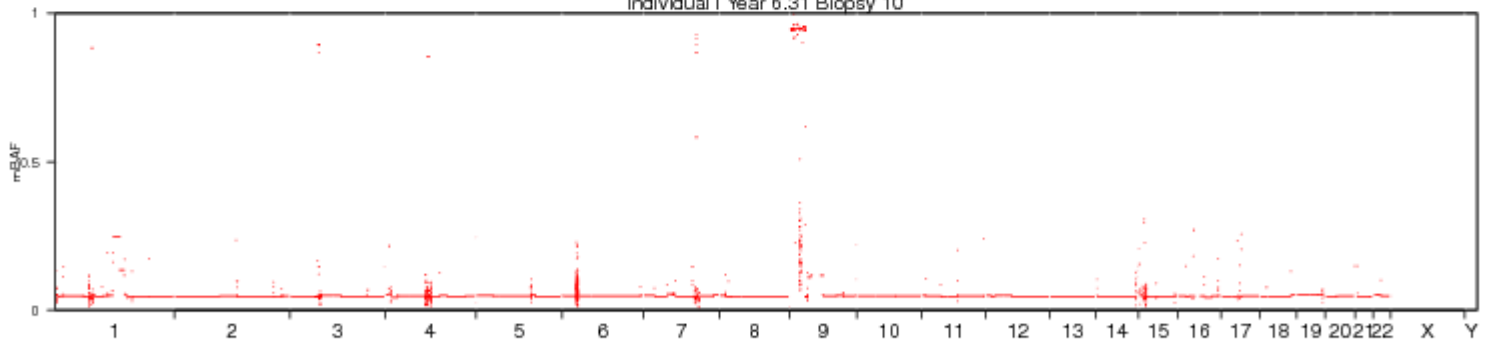

Individual I Year 6.31 Biopsy 10

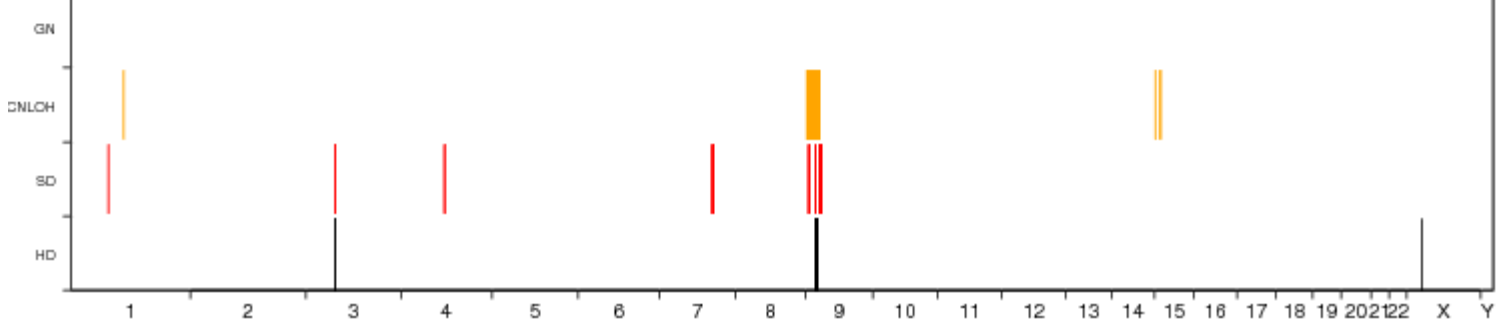

Individual I Year 9.76 Biopsy 11

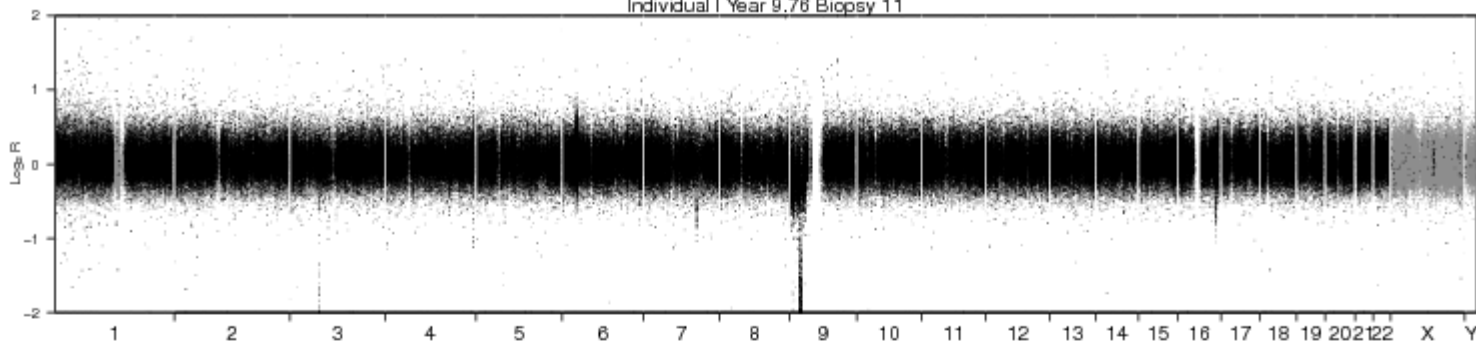

Individual I Year 9.76 Biopsy 11

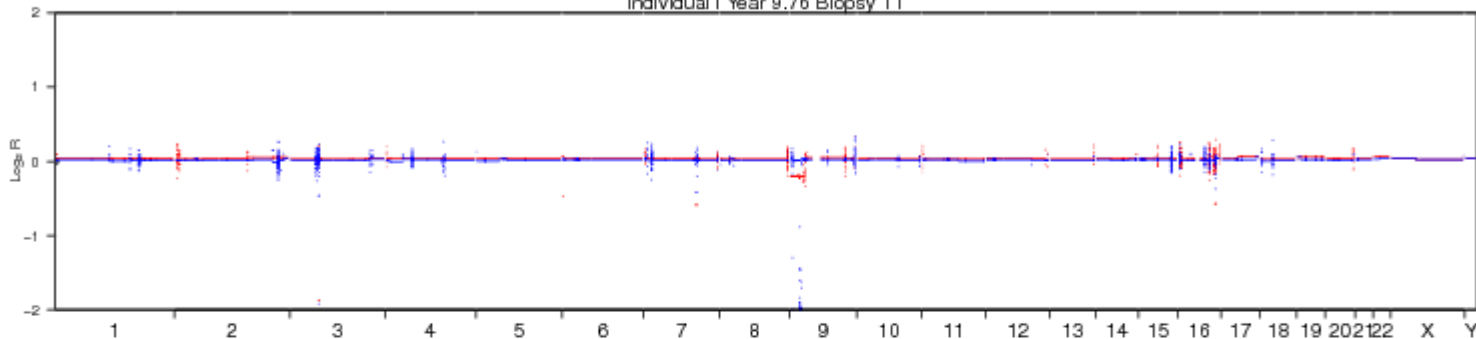

Individual I Year 9.76 Biopsy 11

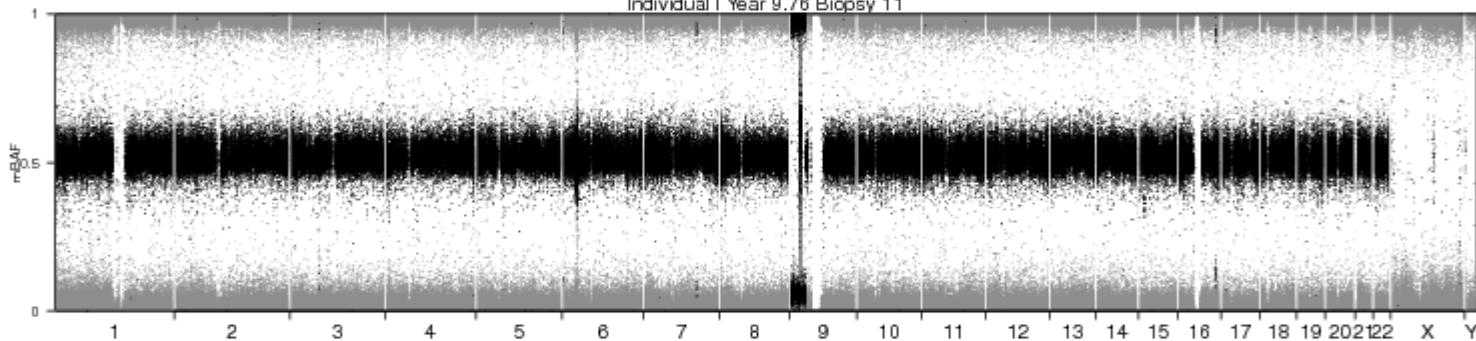

Individual I Year 9.76 Biopsy 11

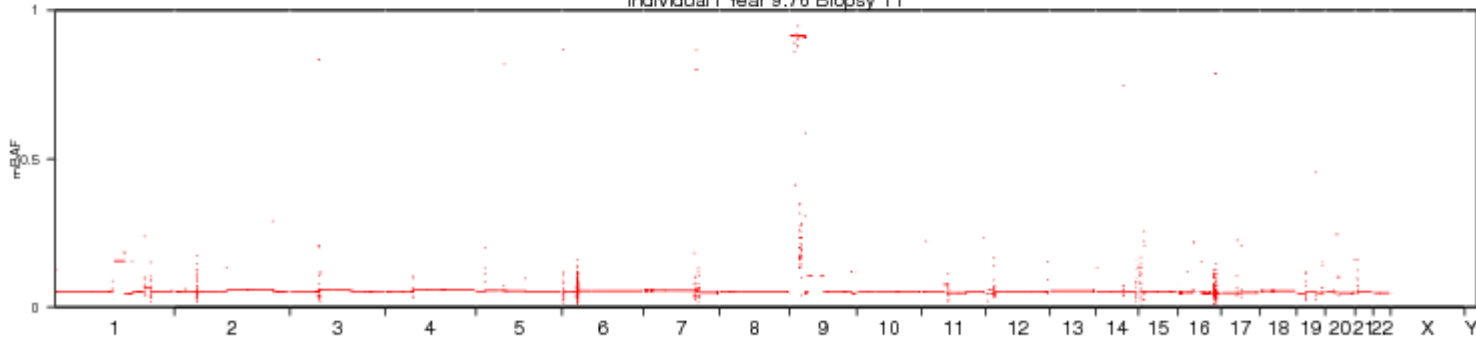

Individual I Year 9.76 Biopsy 11

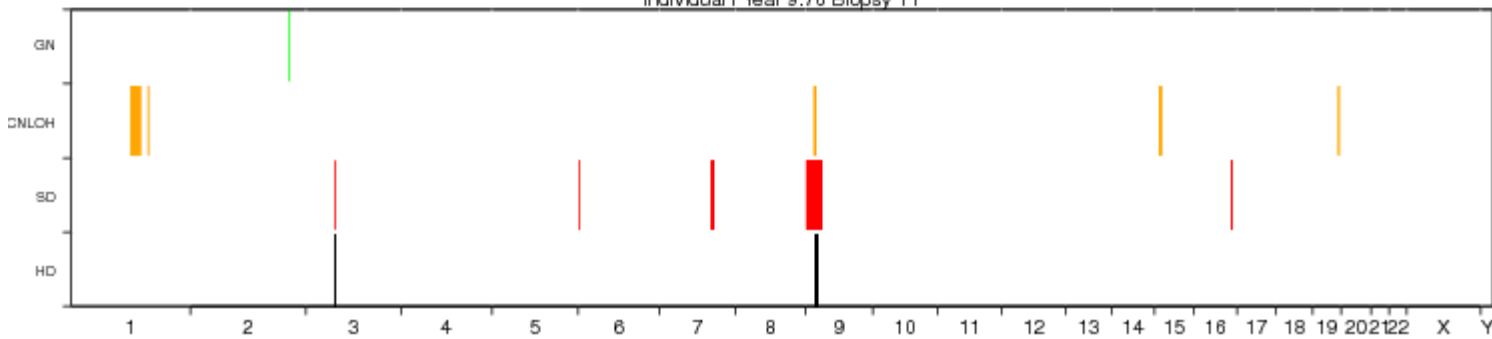

Individual I Year 9.76 Biopsy 12

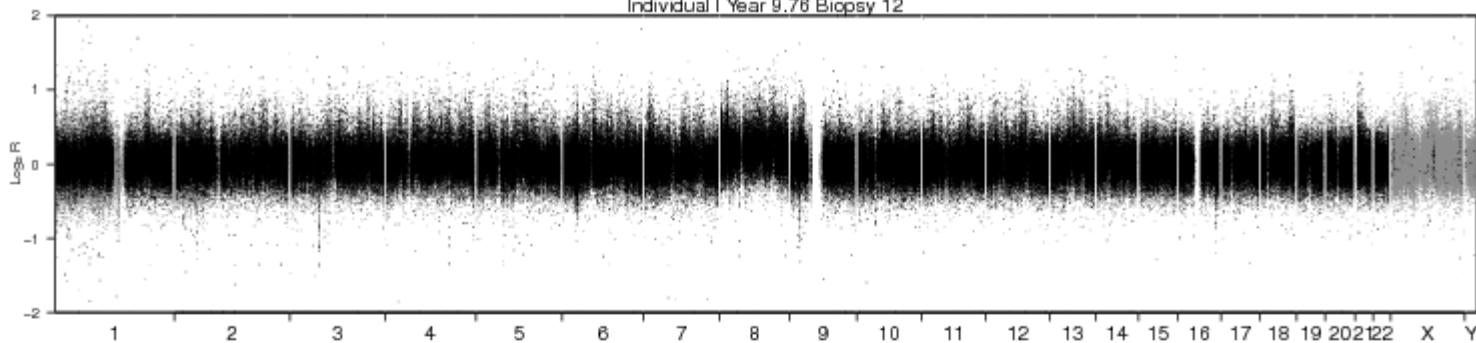

Individual I Year 9.76 Biopsy 12

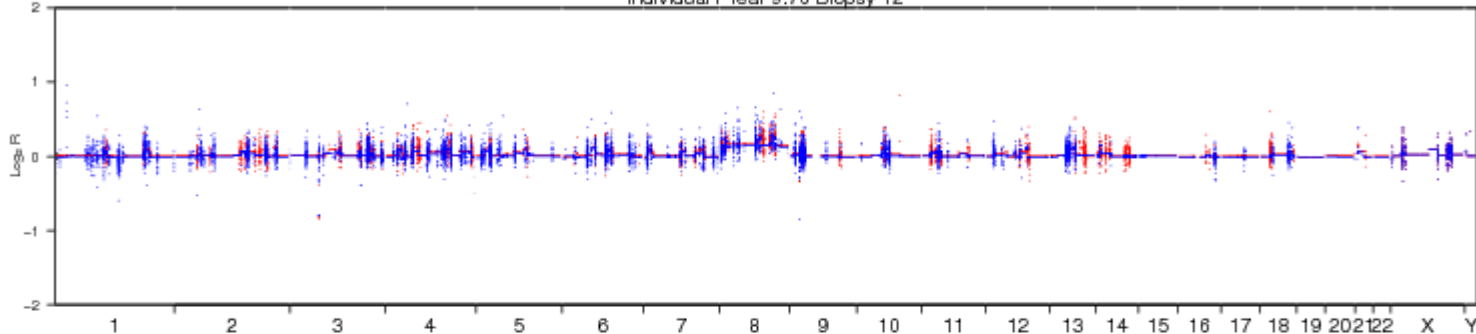

Individual I Year 9.76 Biopsy 12

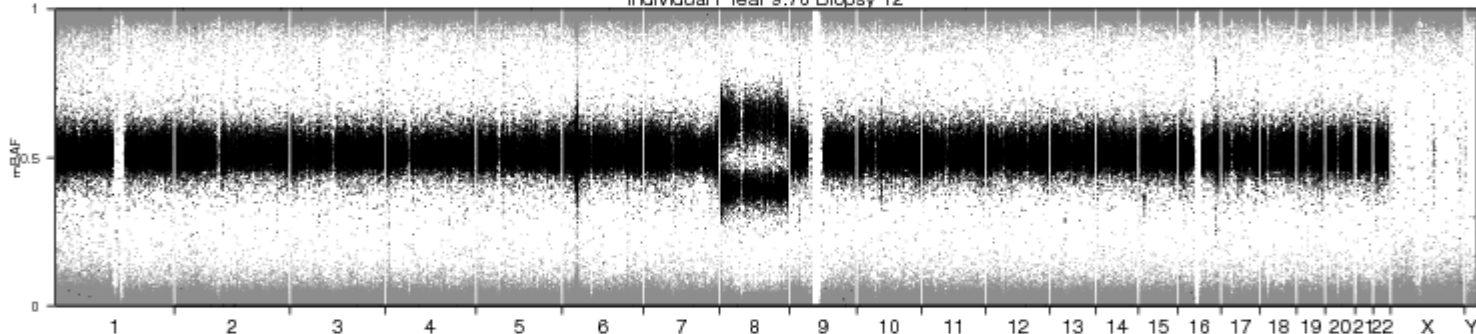

Individual I Year 9.76 Biopsy 12

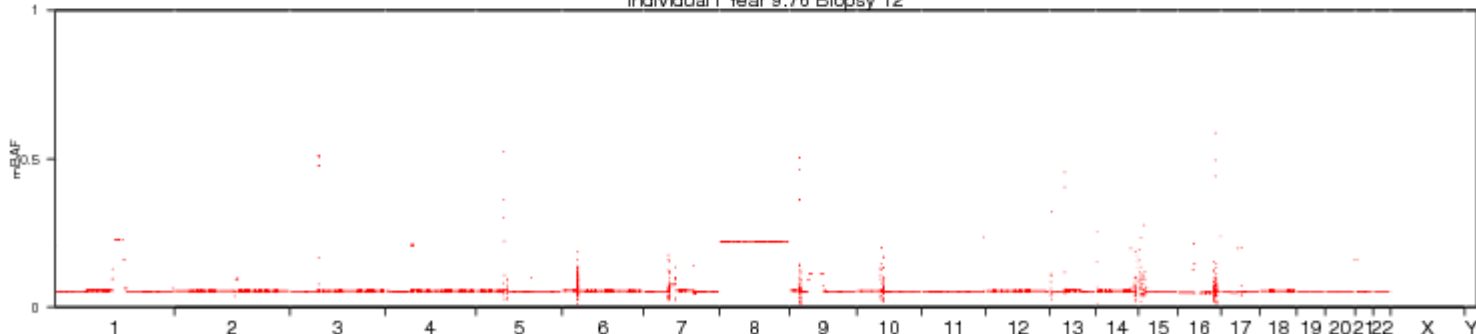

Individual I Year 9.76 Biopsy 12

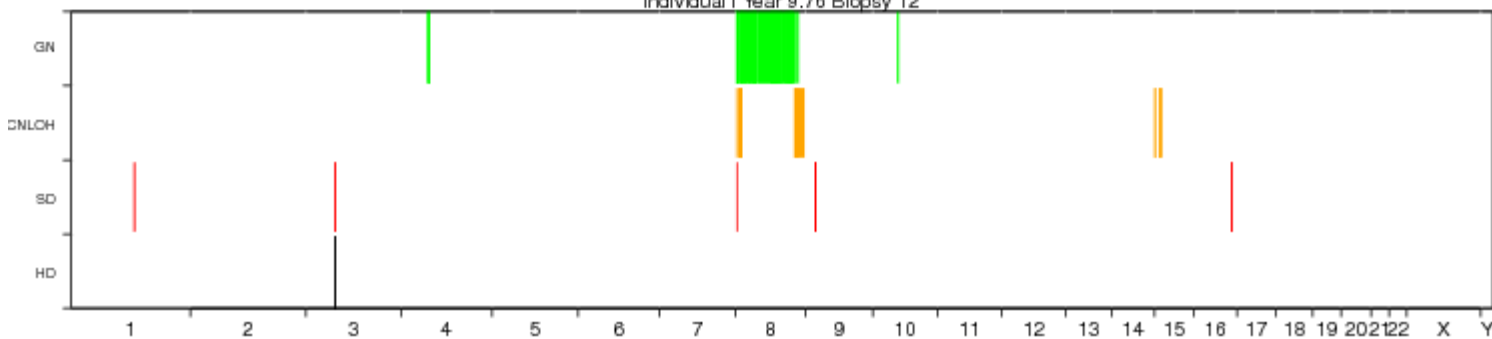

Individual m Year 0 Biopsy 1

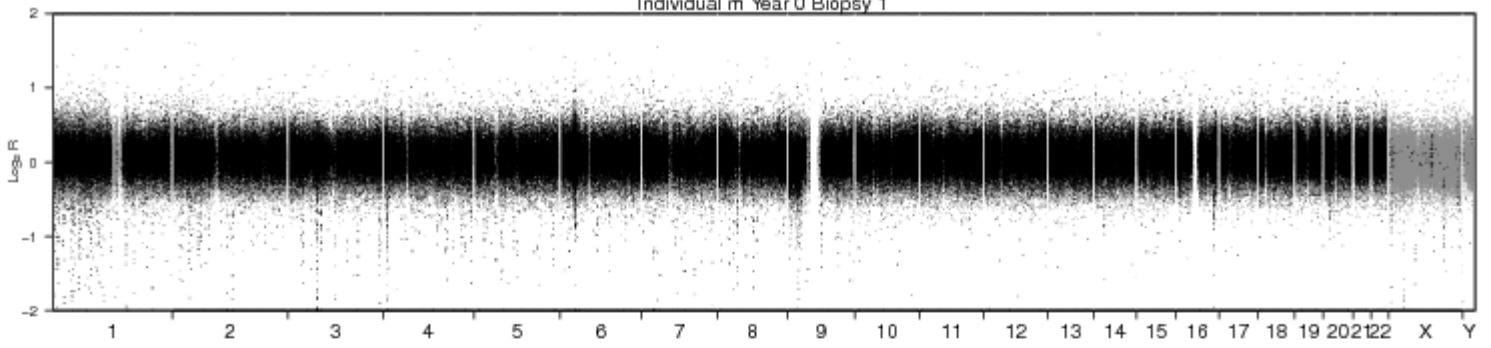

Individual m Year 0 Biopsy 1

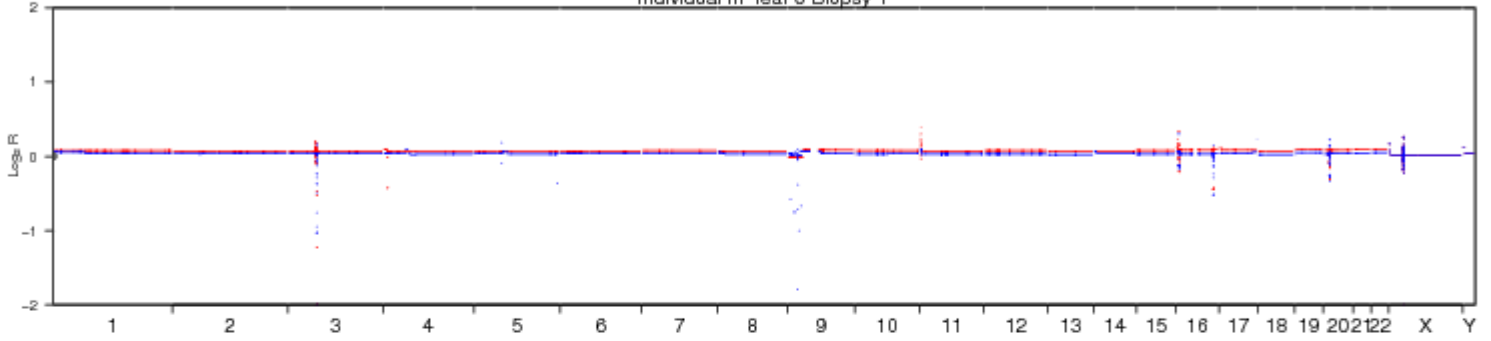

Individual m Year 0 Biopsy 1

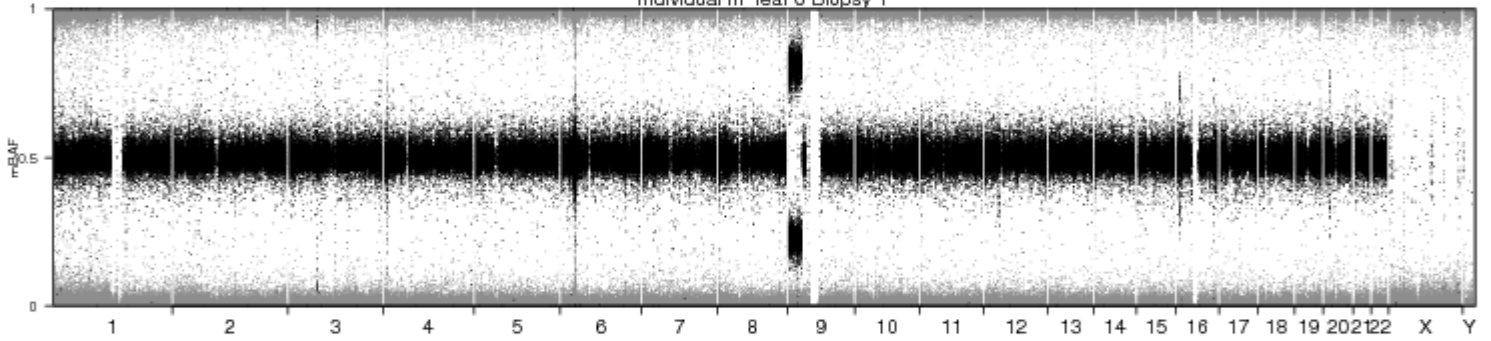

Individual m Year 0 Biopsy 1

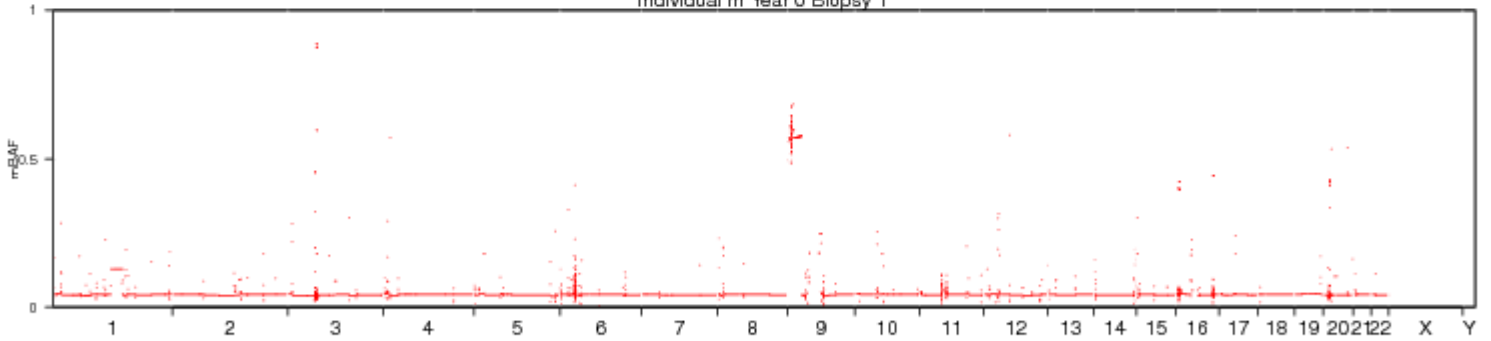

Individual m Year 0 Biopsy 1

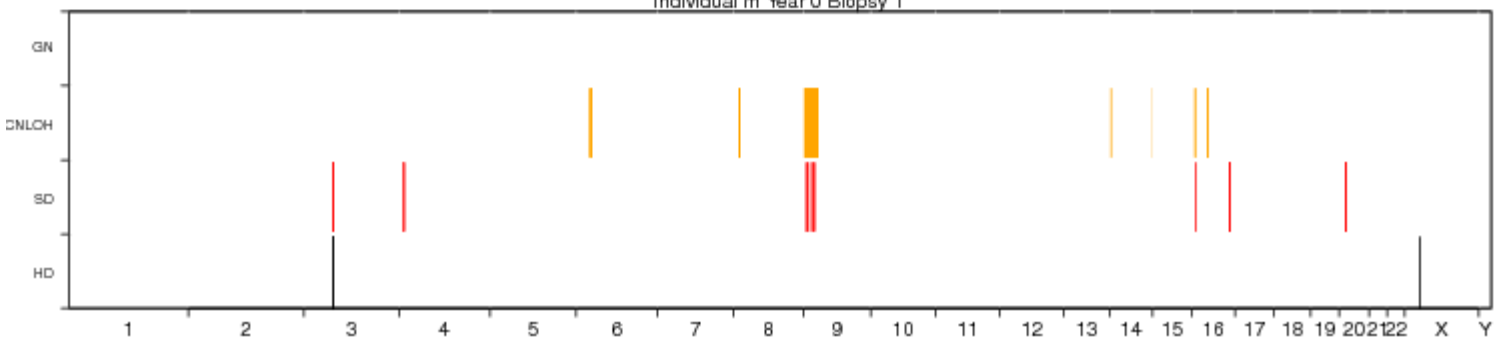



Individual m Year 0 Biopsy 2

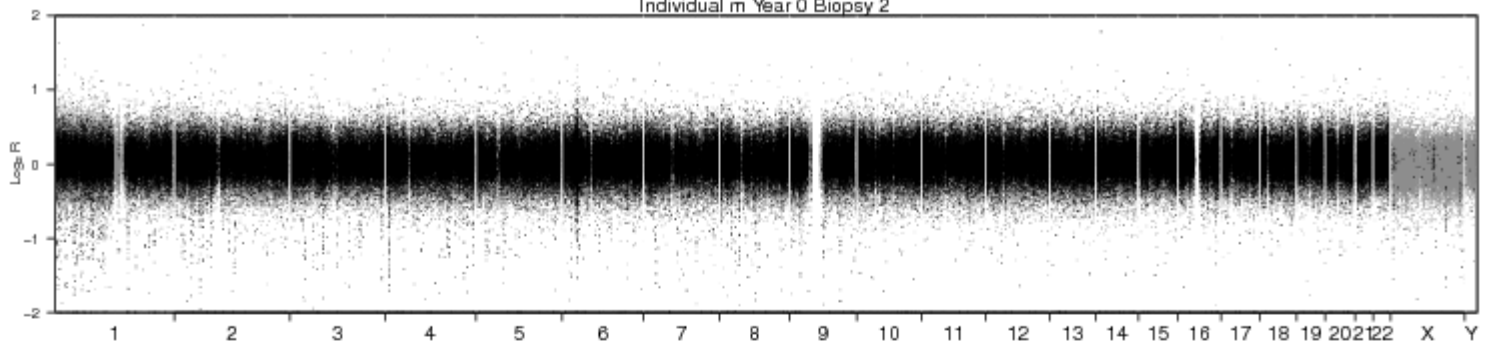

Individual m Year 0 Biopsy 2

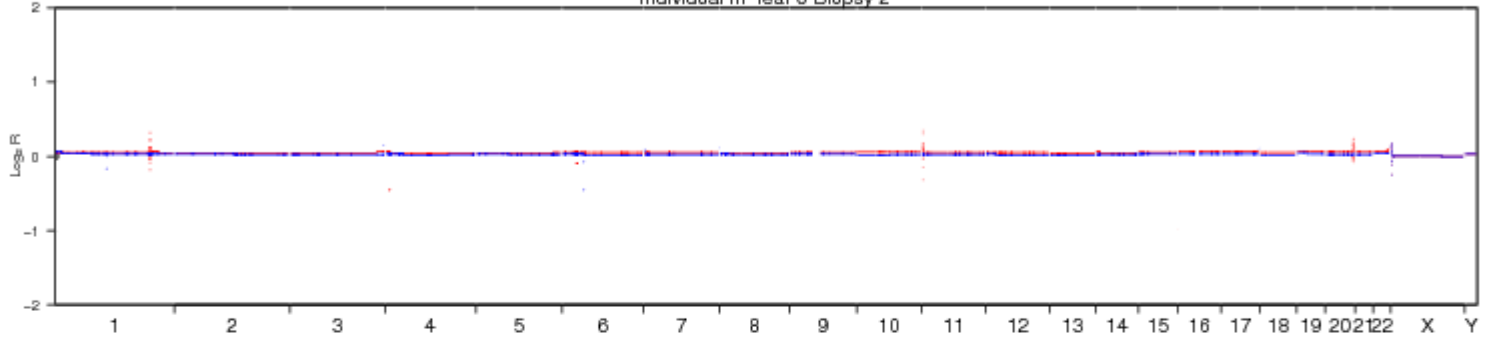

Individual m Year 0 Biopsy 2

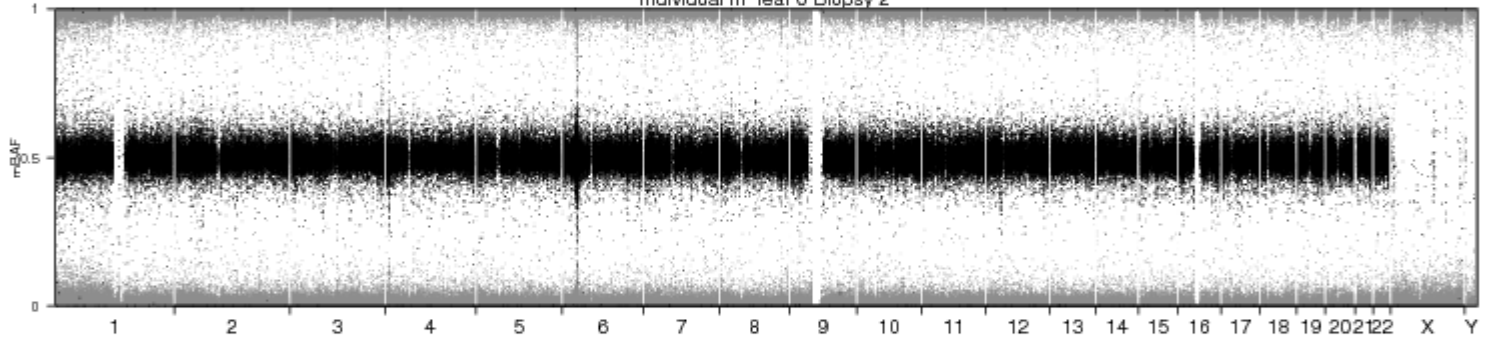

Individual m Year 0 Biopsy 2

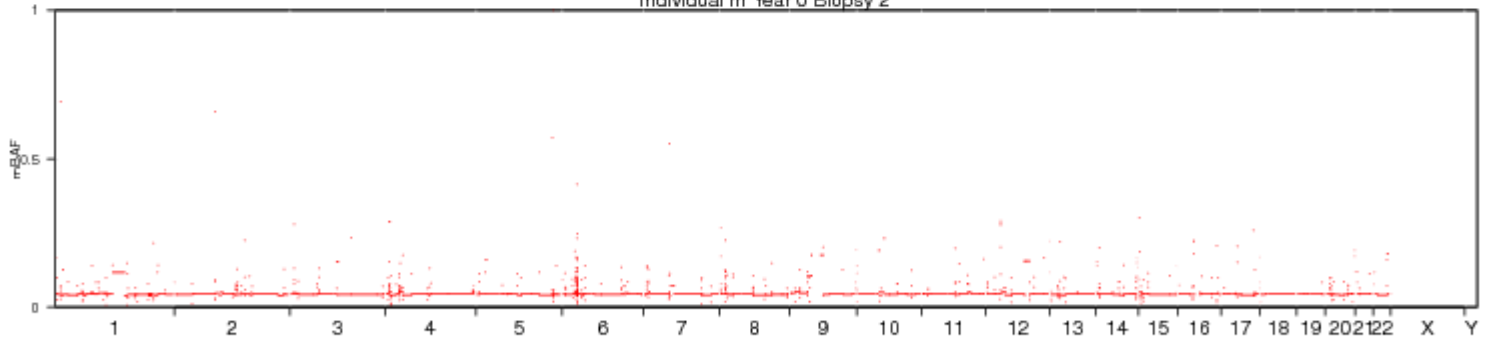

Individual m Year 0 Biopsy 2

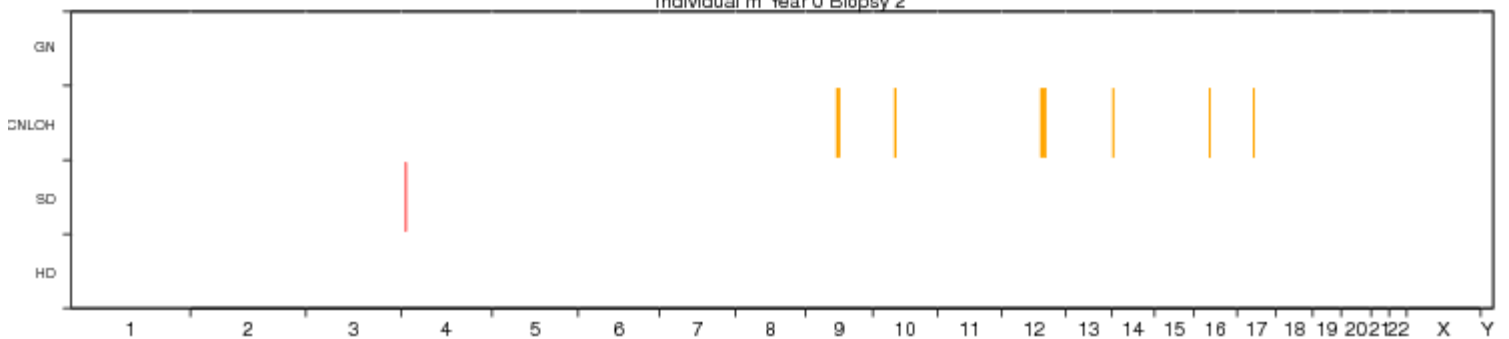

Individual m Year 2.51 Biopsy 3

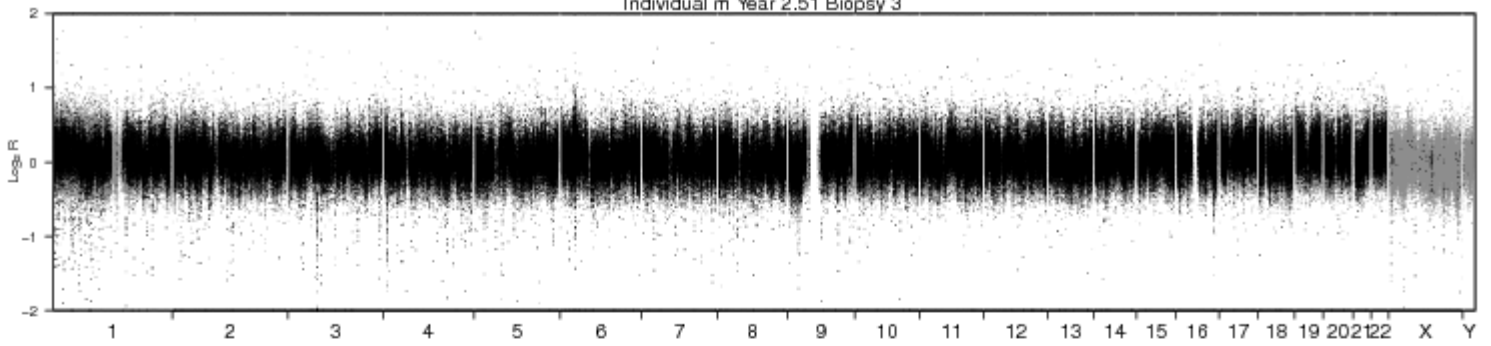

Individual m Year 2.51 Biopsy 3

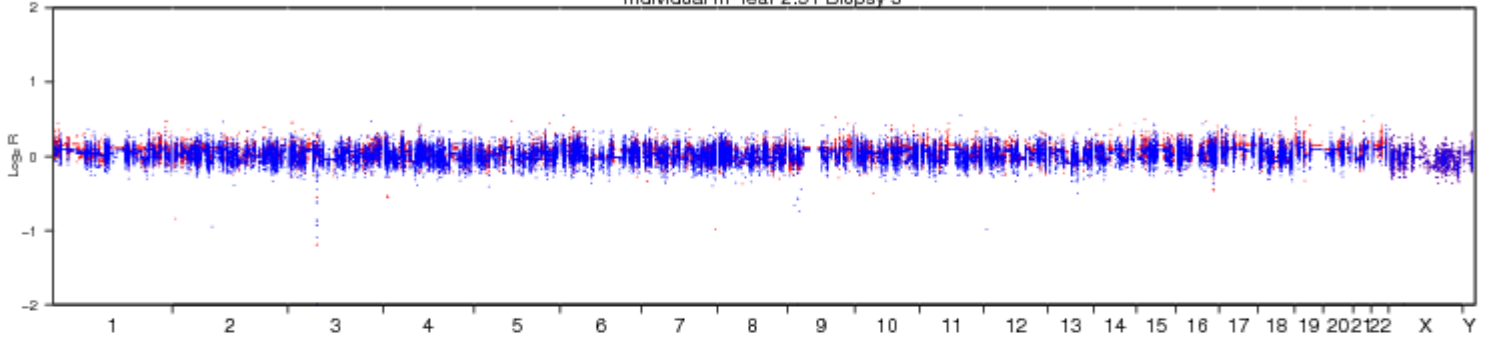

Individual m Year 2.51 Biopsy 3

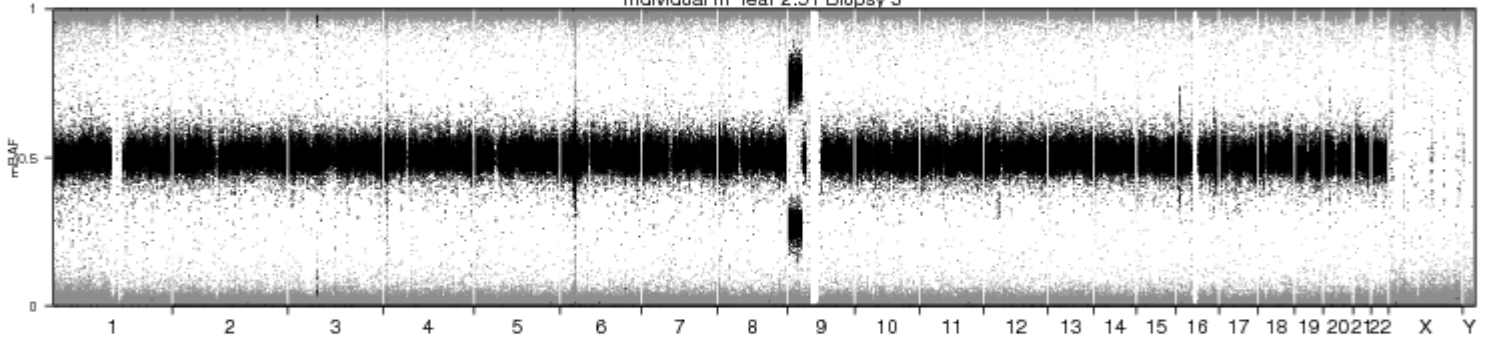

Individual m Year 2.51 Biopsy 3

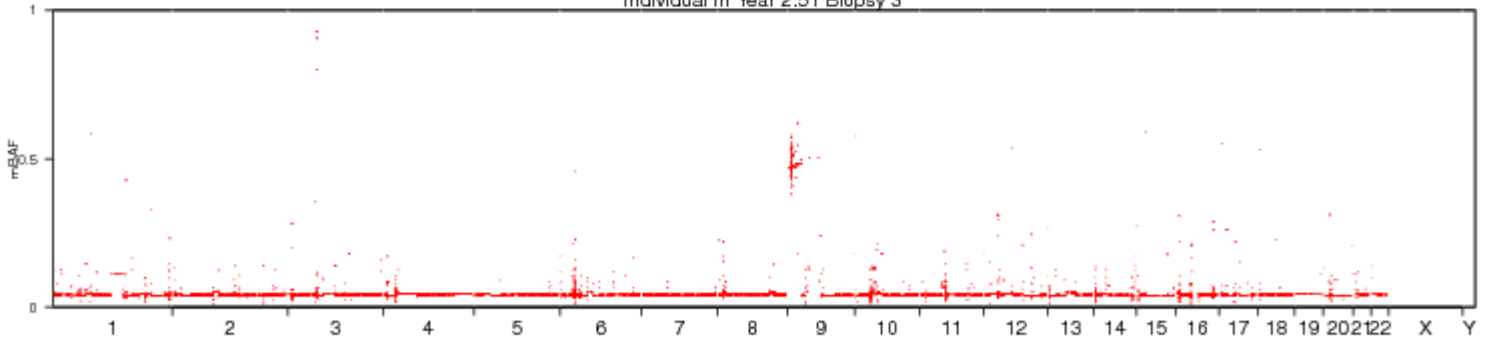

Individual m Year 2.51 Biopsy 3

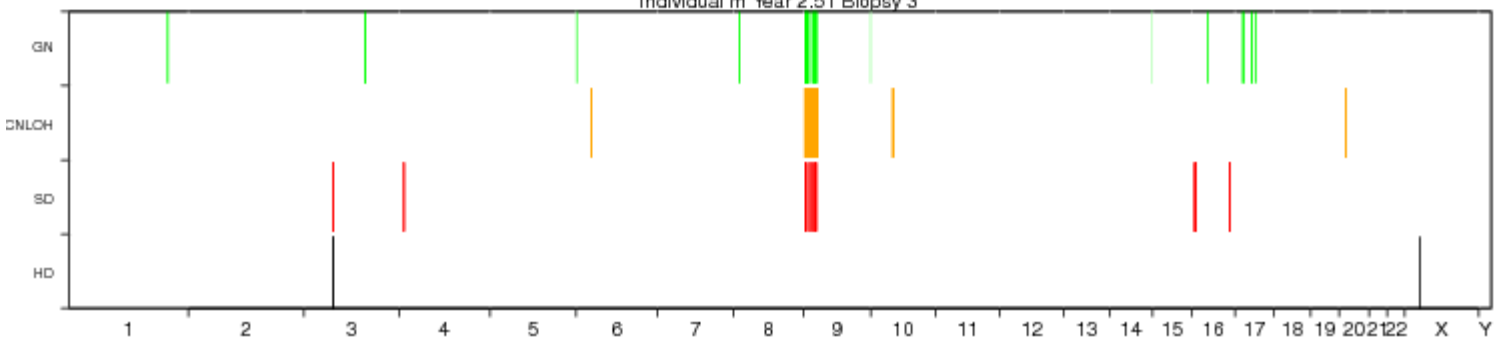

Individual m Year 2.51 Biopsy 4

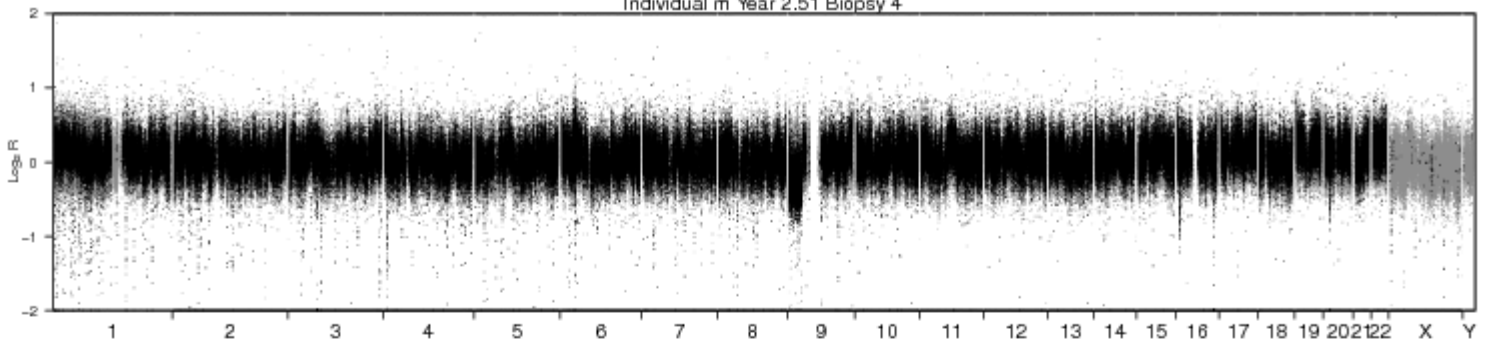

Individual m Year 2.51 Biopsy 4

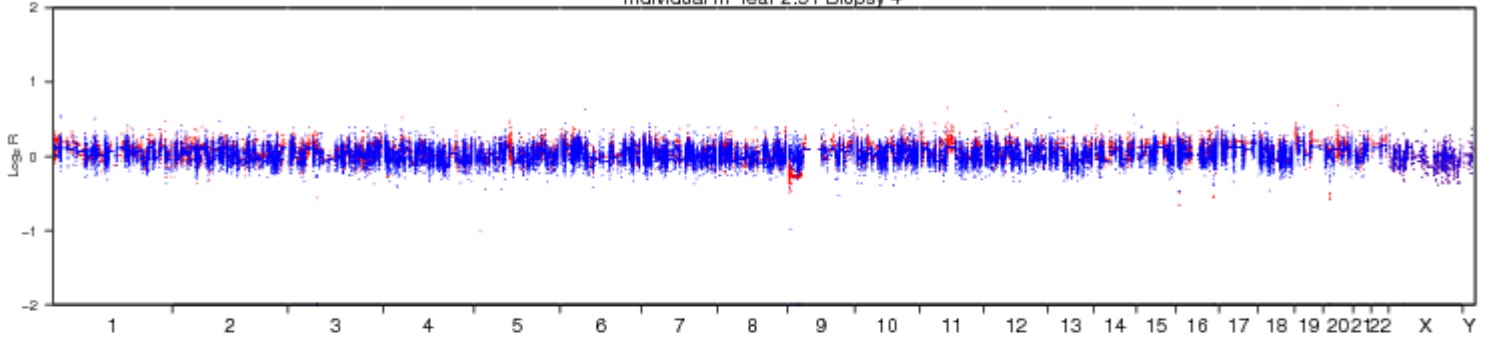

Individual m Year 2.51 Biopsy 4

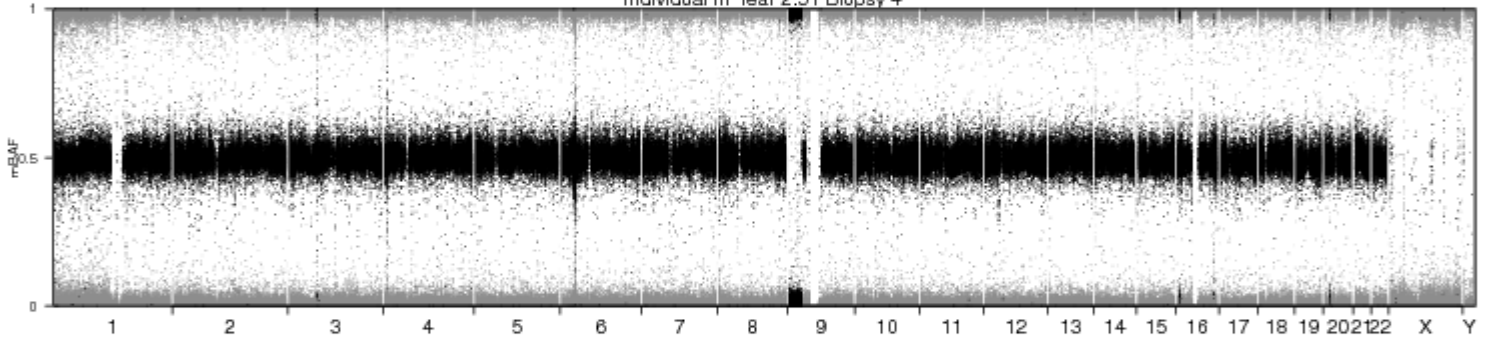

Individual m Year 2.51 Biopsy 4

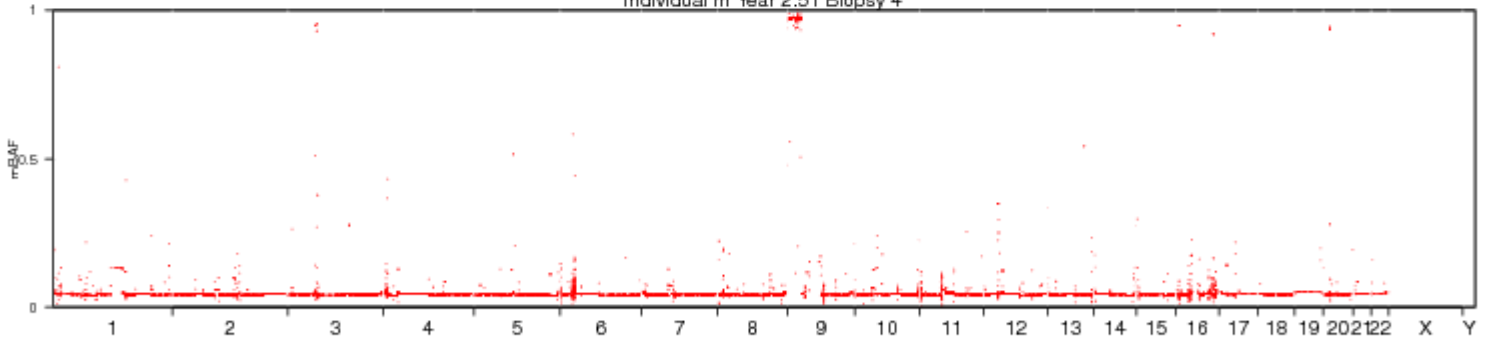

Individual m Year 2.51 Biopsy 4

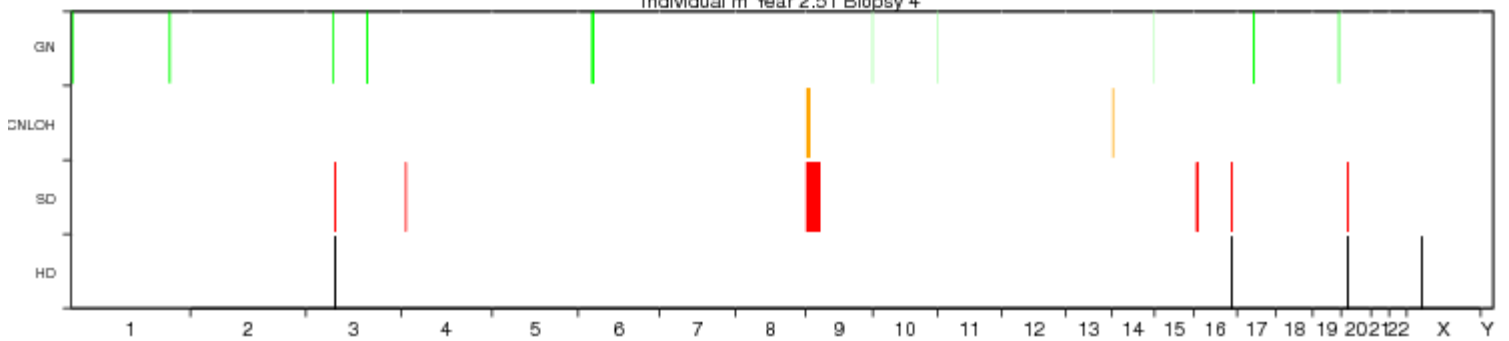

Individual m Year 6.04 Biopsy 5

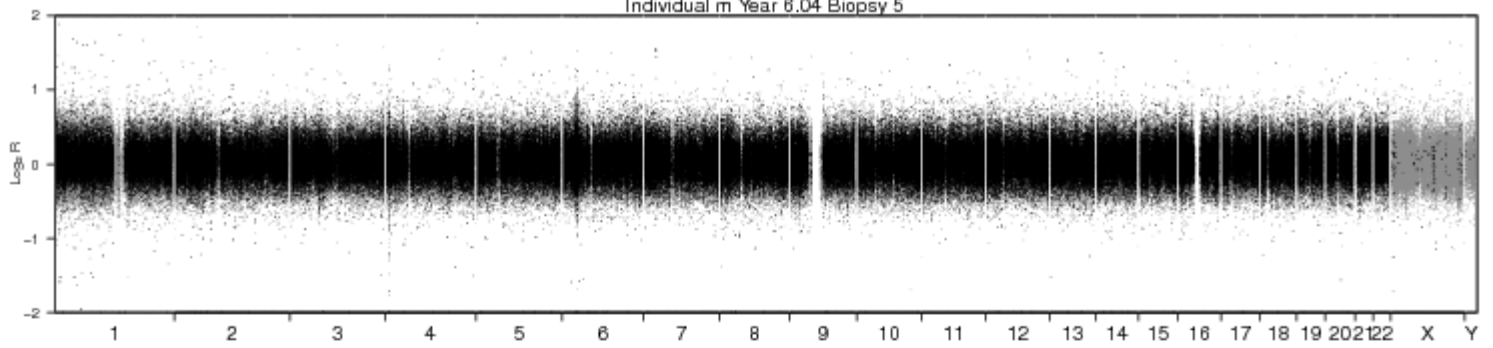

Individual m Year 6.04 Biopsy 5

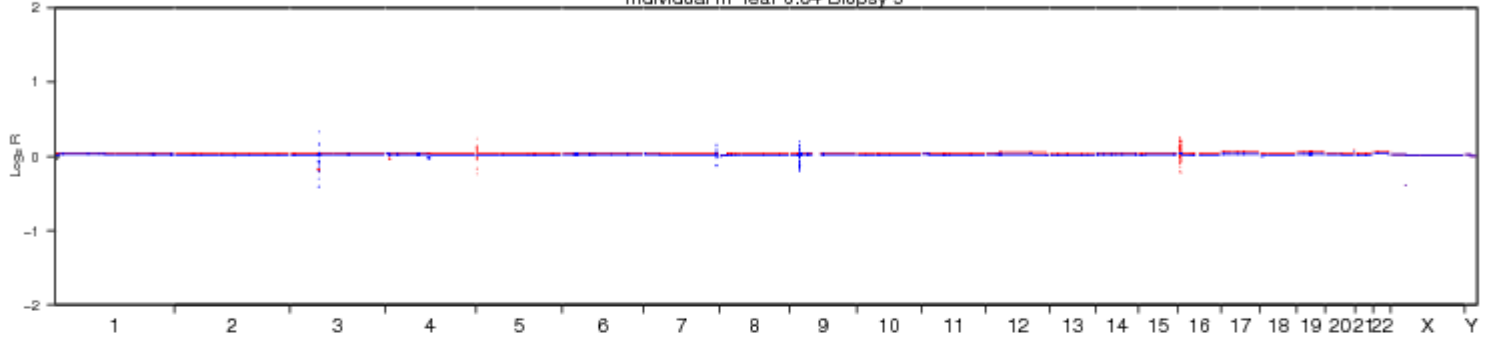

Individual m Year 6.04 Biopsy 5

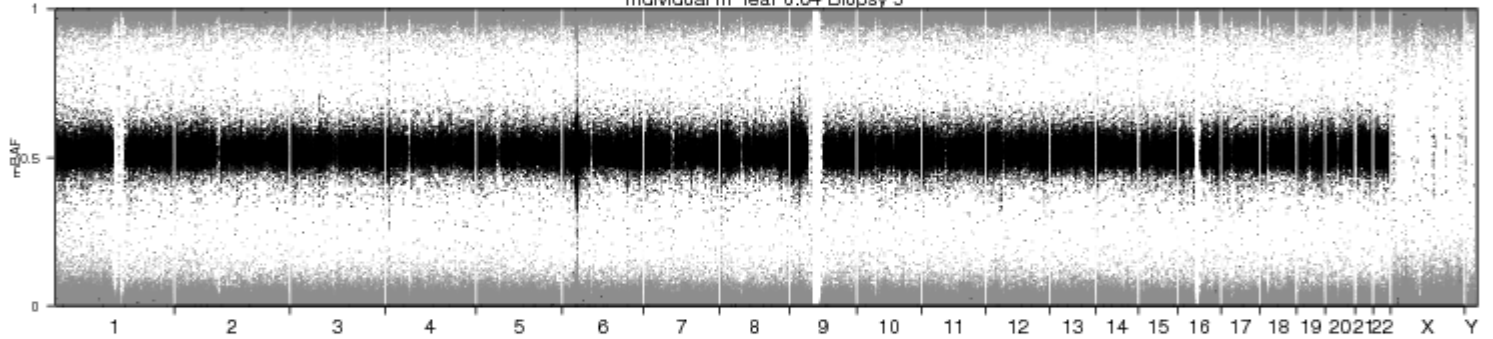

Individual m Year 6.04 Biopsy 5

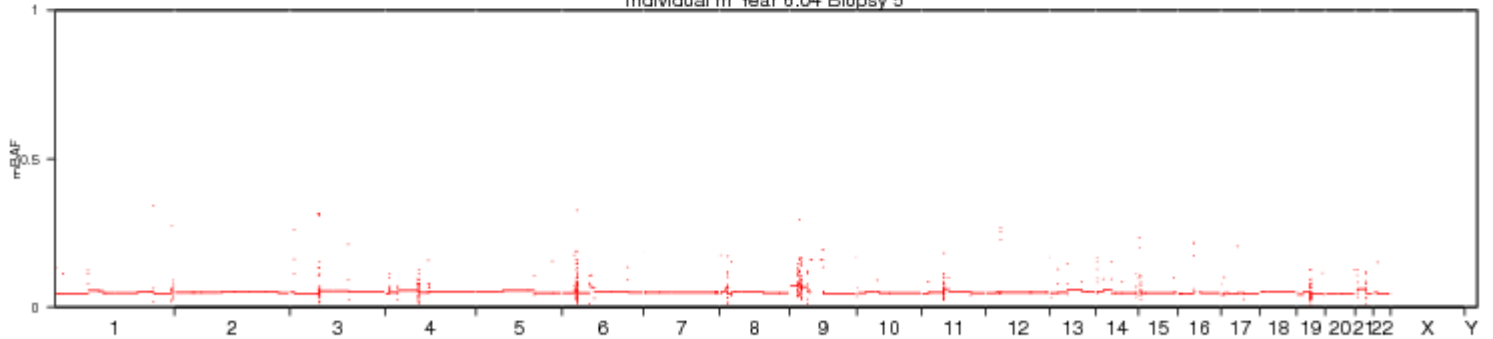

Individual m Year 6.04 Biopsy 5

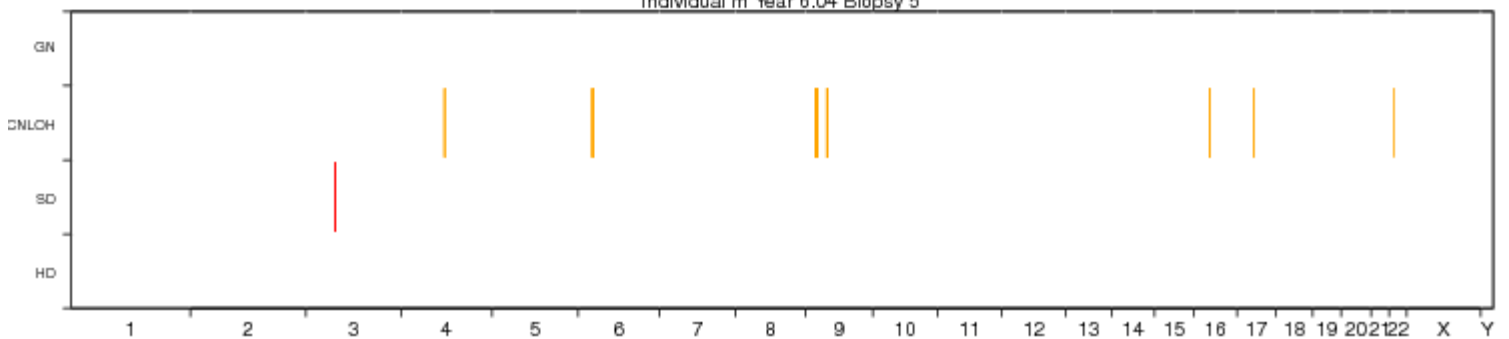



Individual m Year 6.04 Biopsy 6

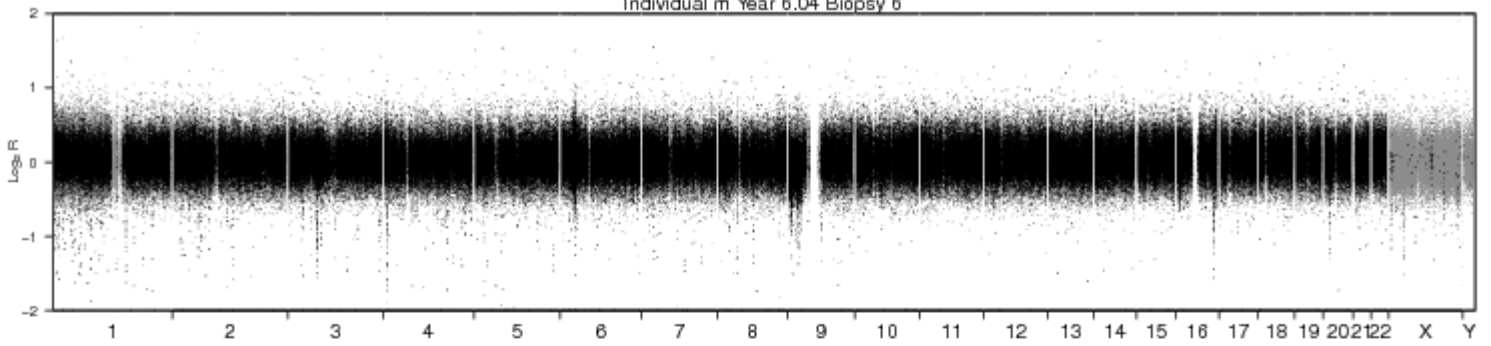

Individual m Year 6.04 Biopsy 6

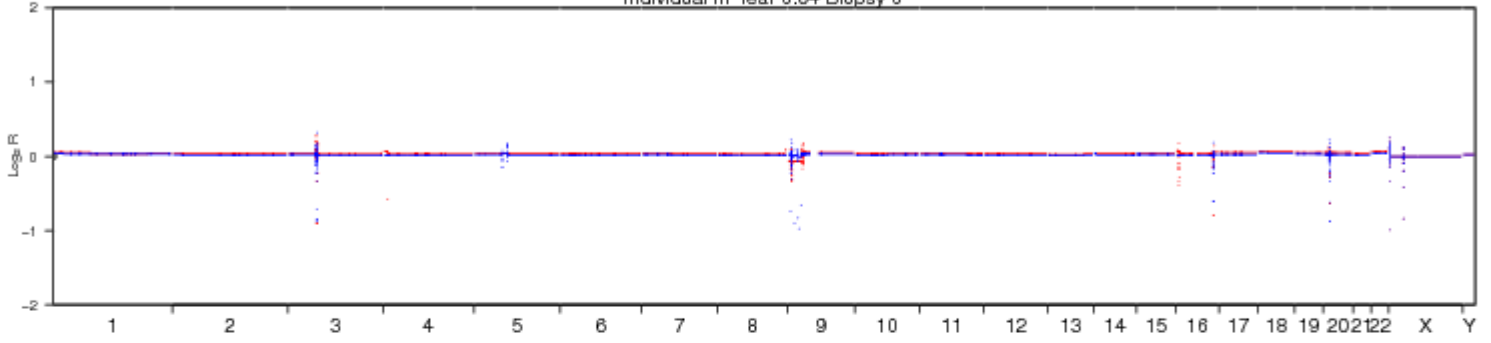

Individual m Year 6.04 Biopsy 6

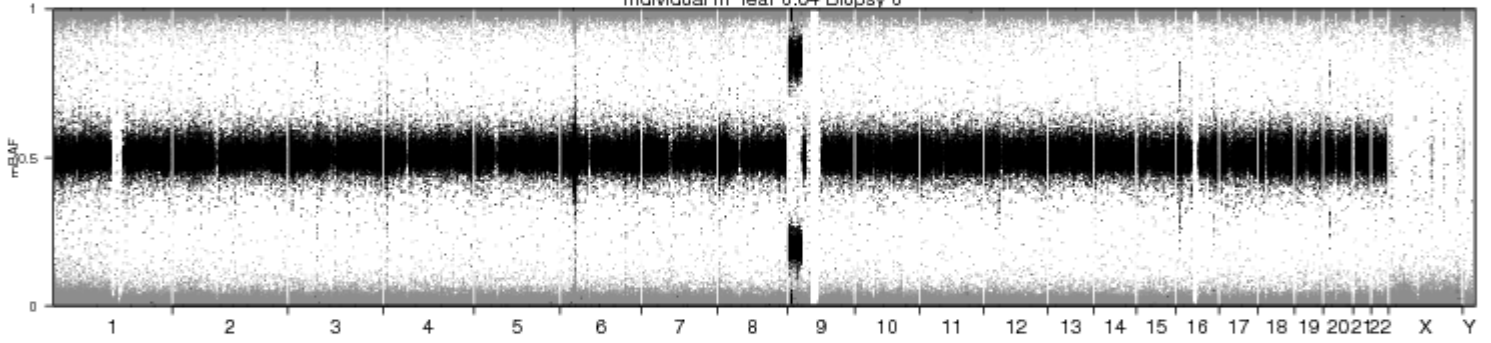

Individual m Year 6.04 Biopsy 6

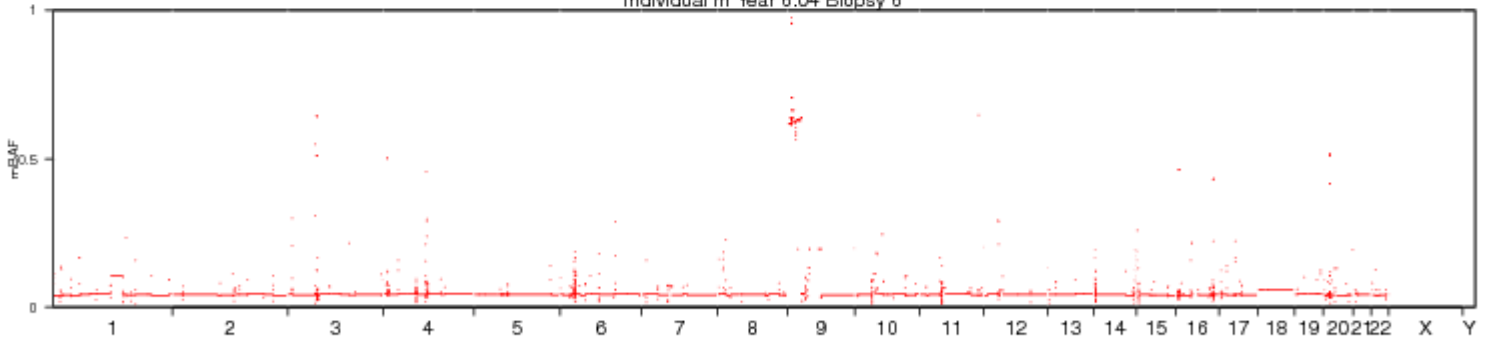

Individual m Year 6.04 Biopsy 6

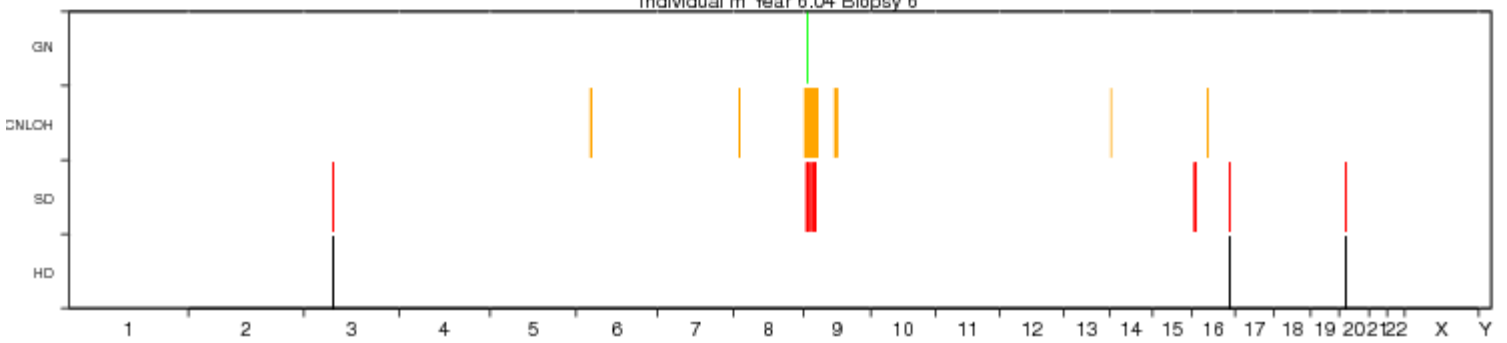

Individual m Year 8.07 Biopsy 7

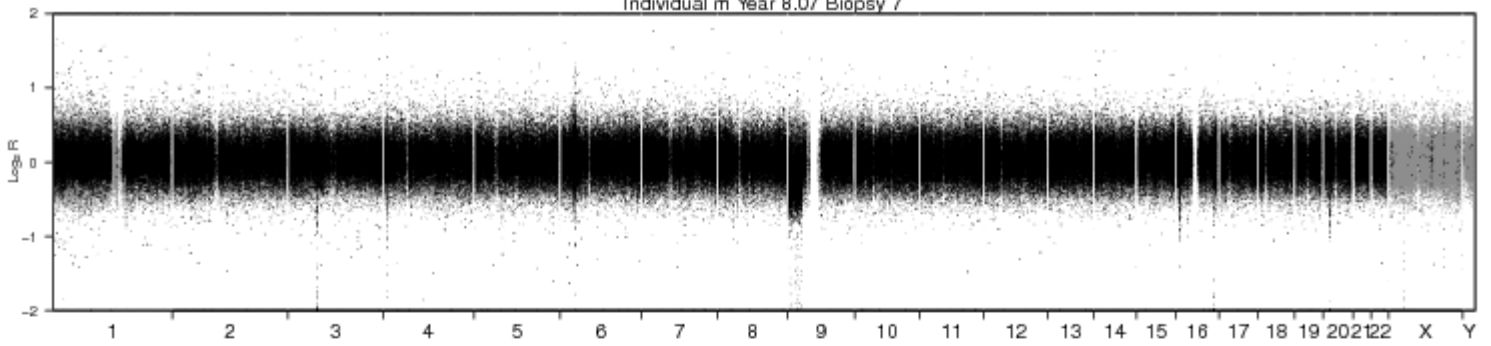

Individual m Year 8.07 Biopsy 7

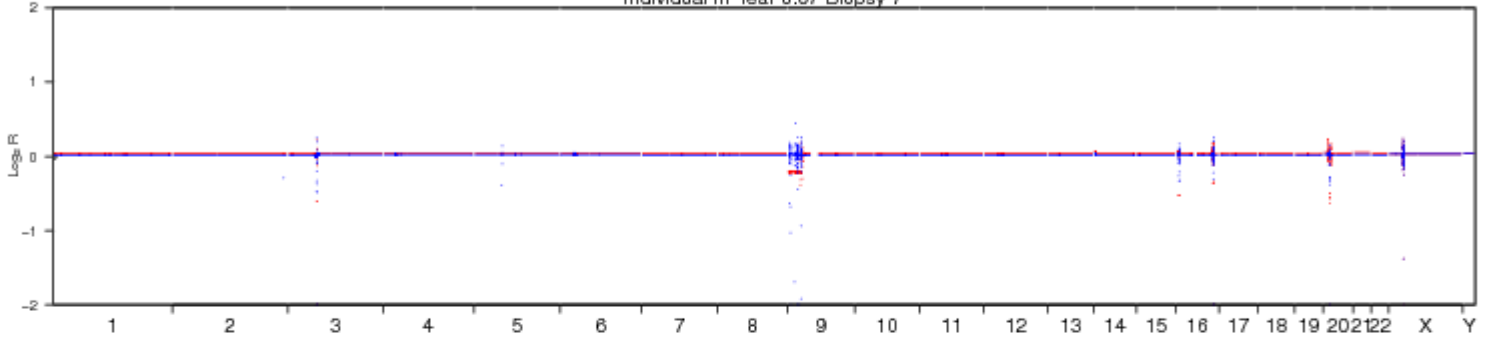

Individual m Year 8.07 Biopsy 7

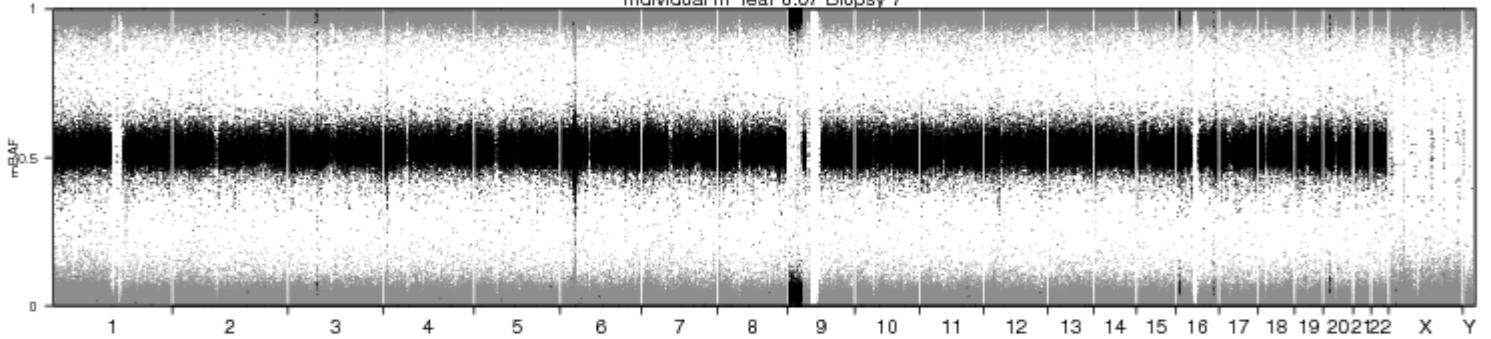

Individual m Year 8.07 Biopsy 7

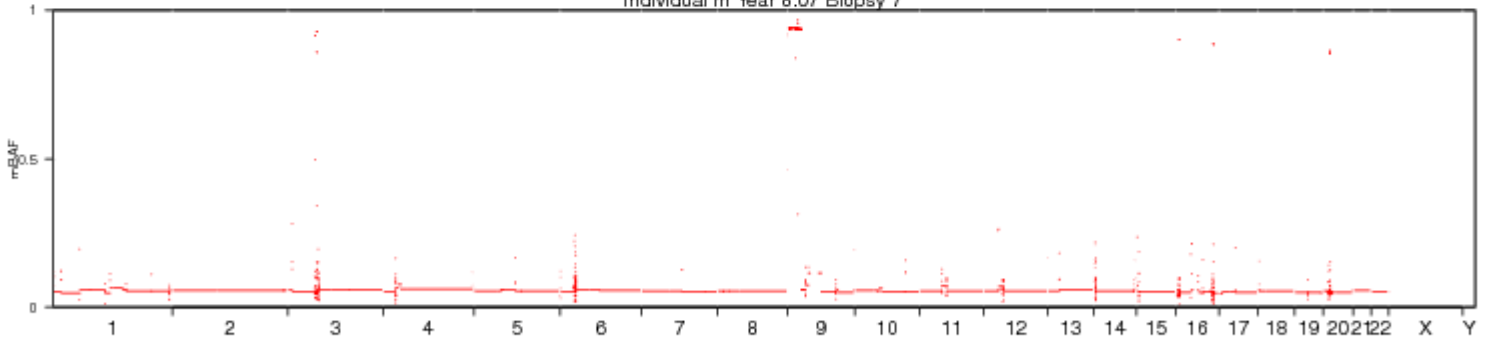

Individual m Year 8.07 Biopsy 7

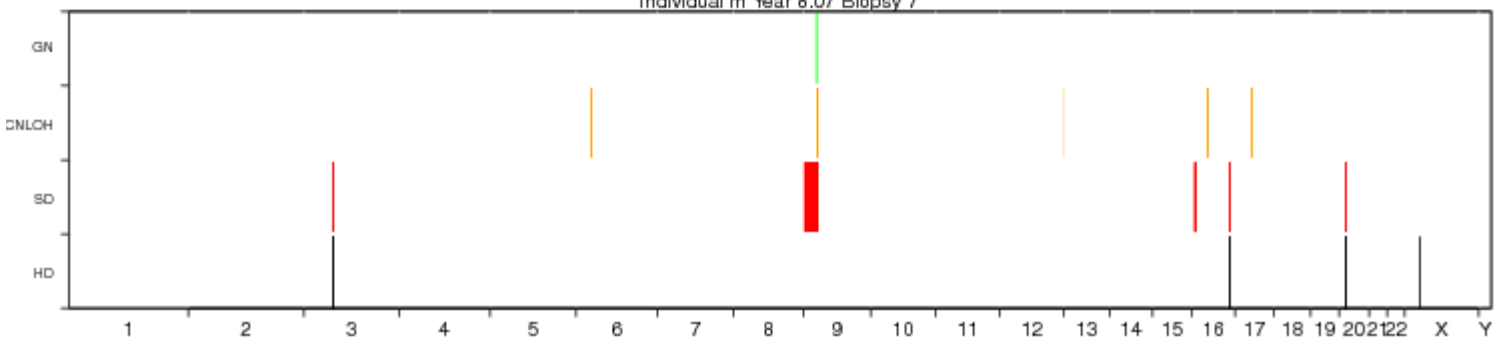

Individual m Year 8.07 Biopsy 8

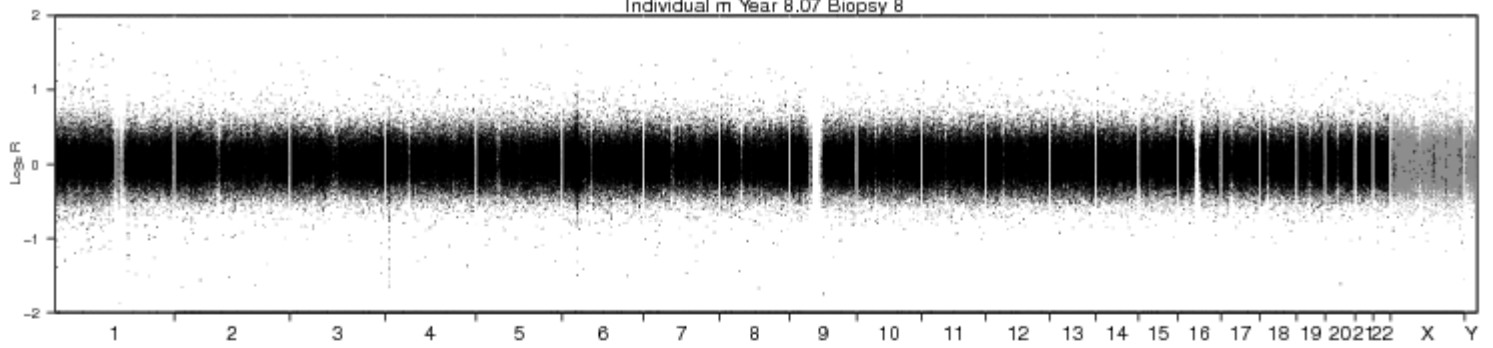

Individual m Year 8.07 Biopsy 8

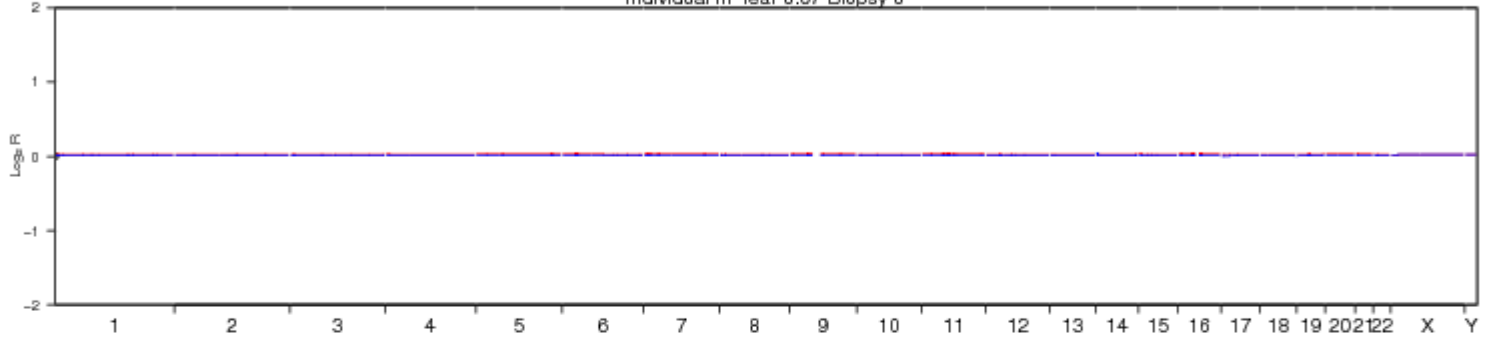

Individual m Year 8.07 Biopsy 8

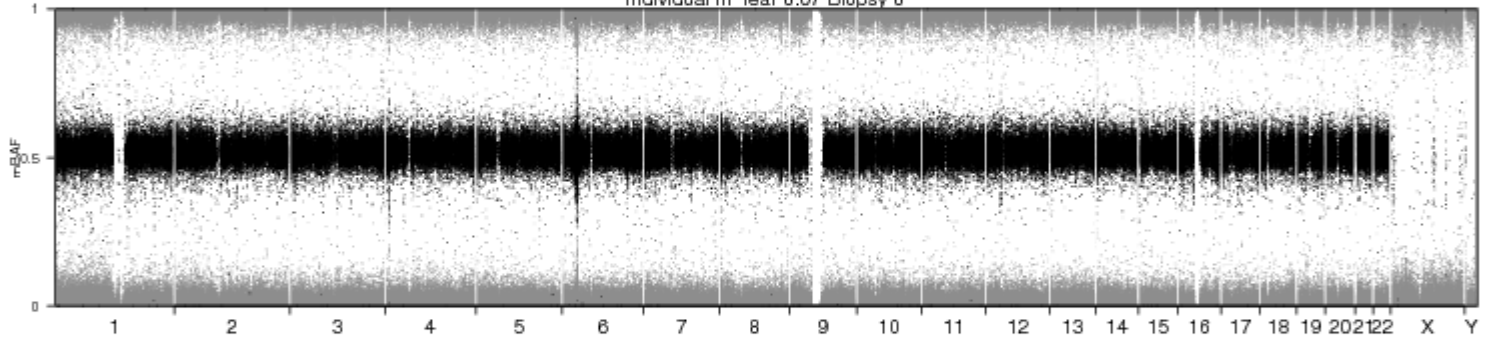

Individual m Year 8.07 Biopsy 8

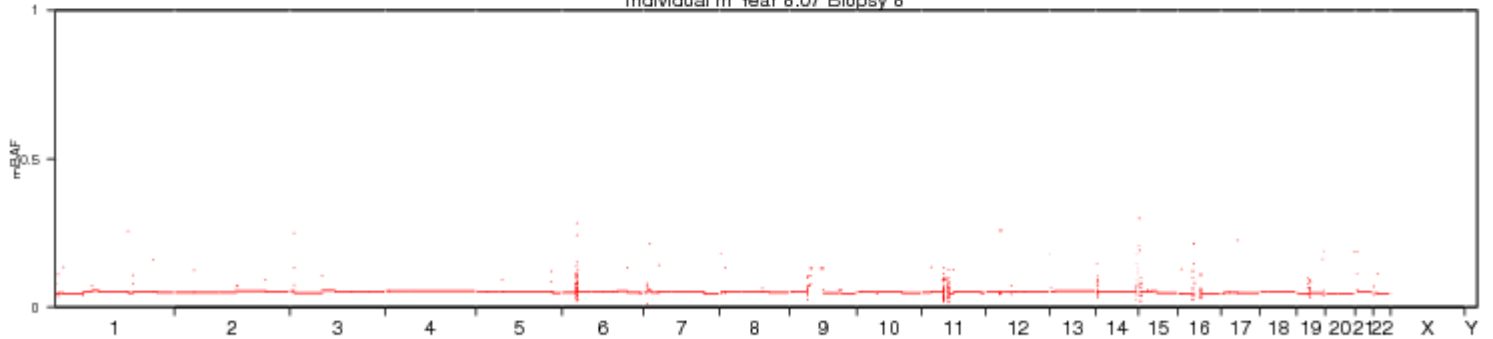

Individual m Year 8.07 Biopsy 8

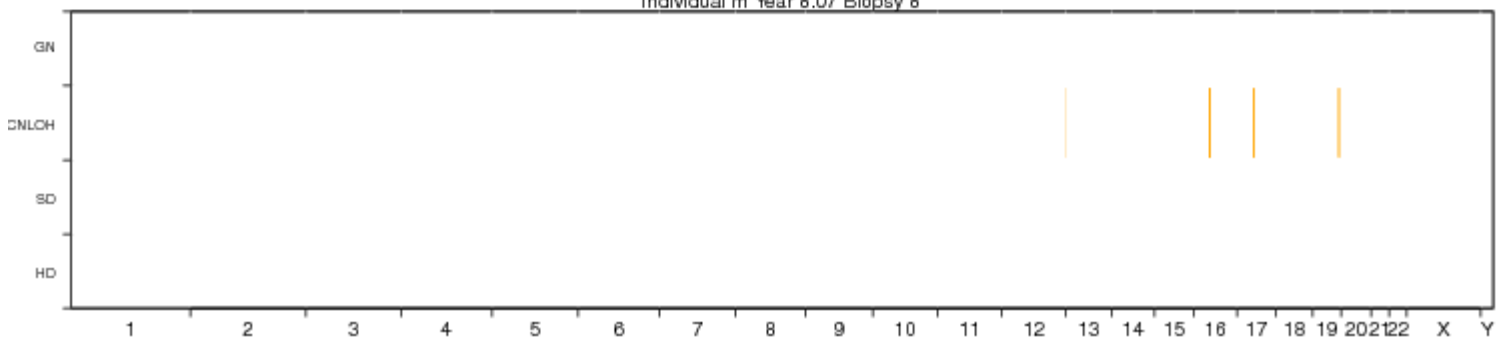

Individual m Year 12.7 Biopsy 9

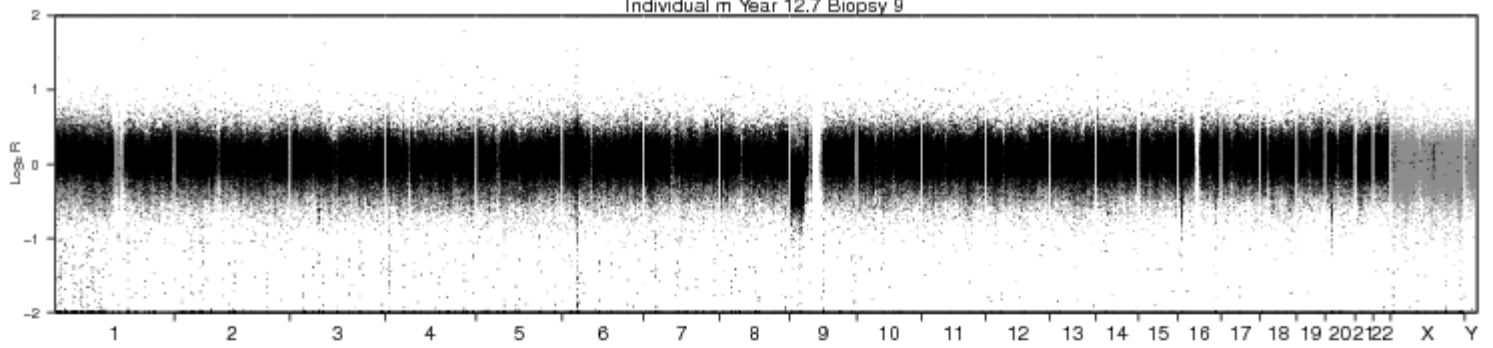

Individual m Year 12.7 Biopsy 9

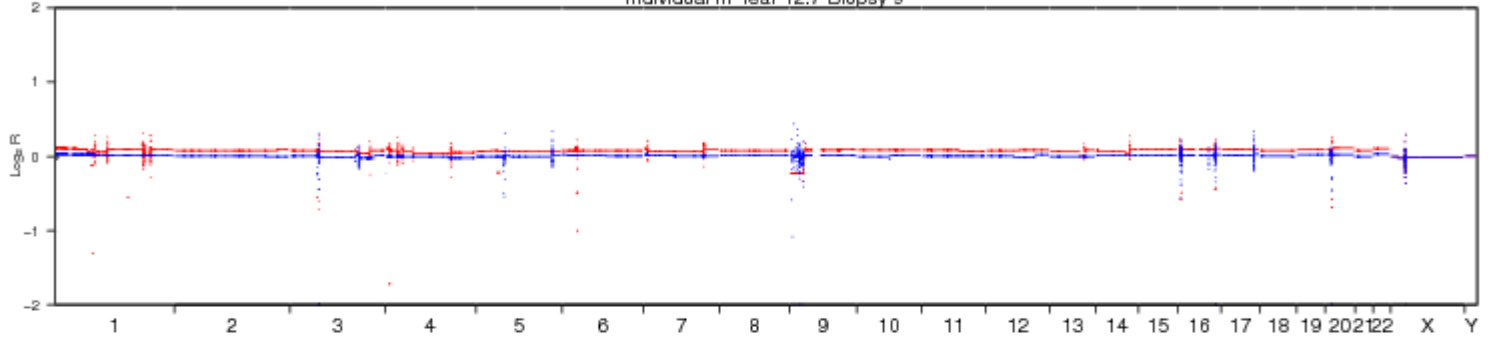

Individual m Year 12.7 Biopsy 9

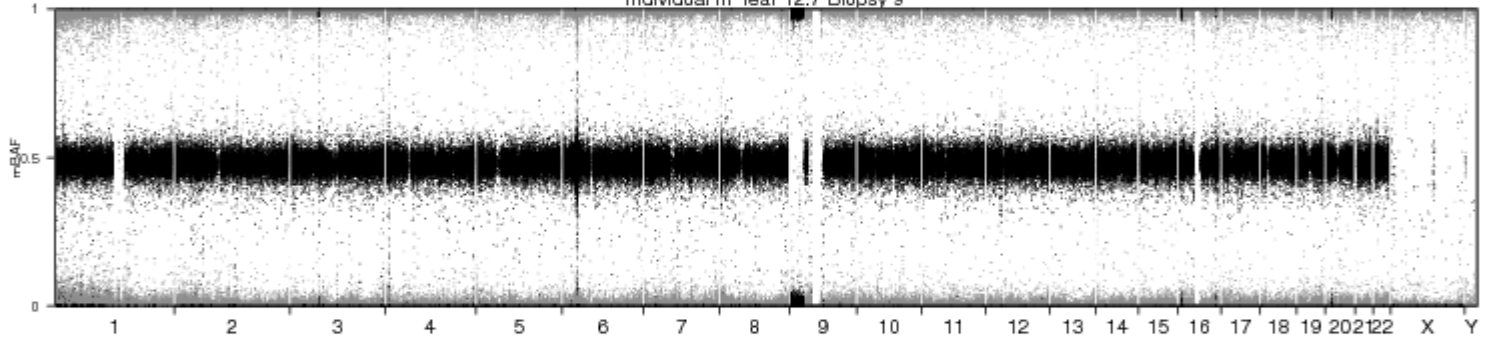

Individual m Year 12.7 Biopsy 9

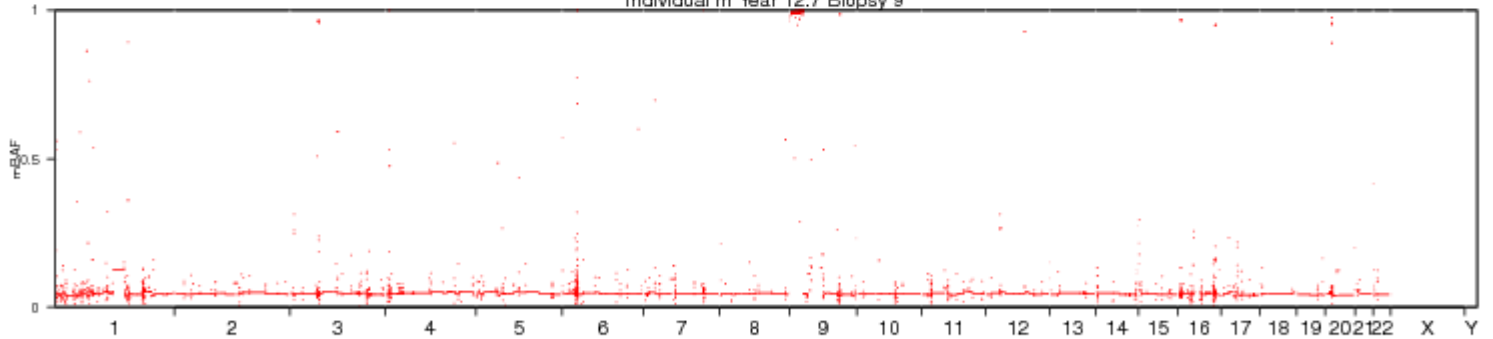

Individual m Year 12.7 Biopsy 9

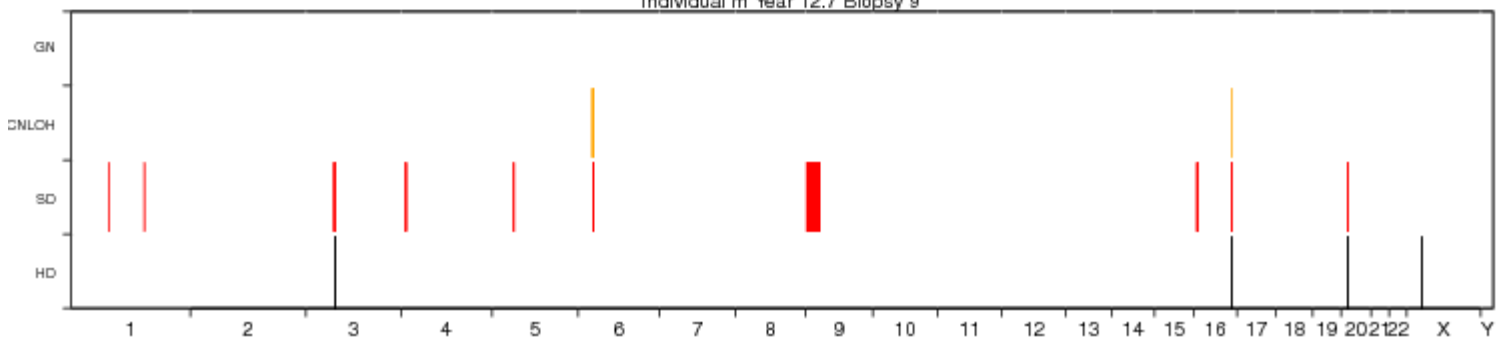



Individual m Year 12.7 Biopsy 10

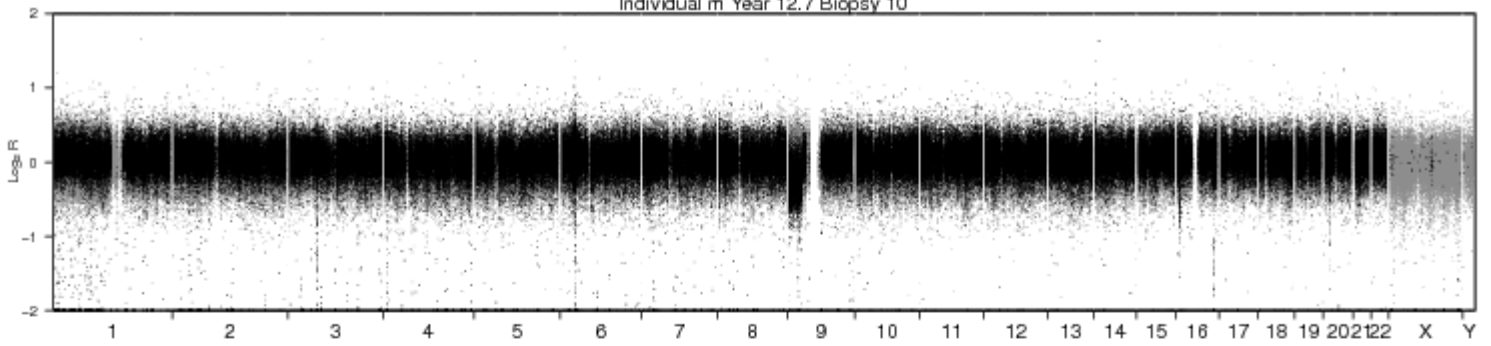

Individual m Year 12.7 Biopsy 10

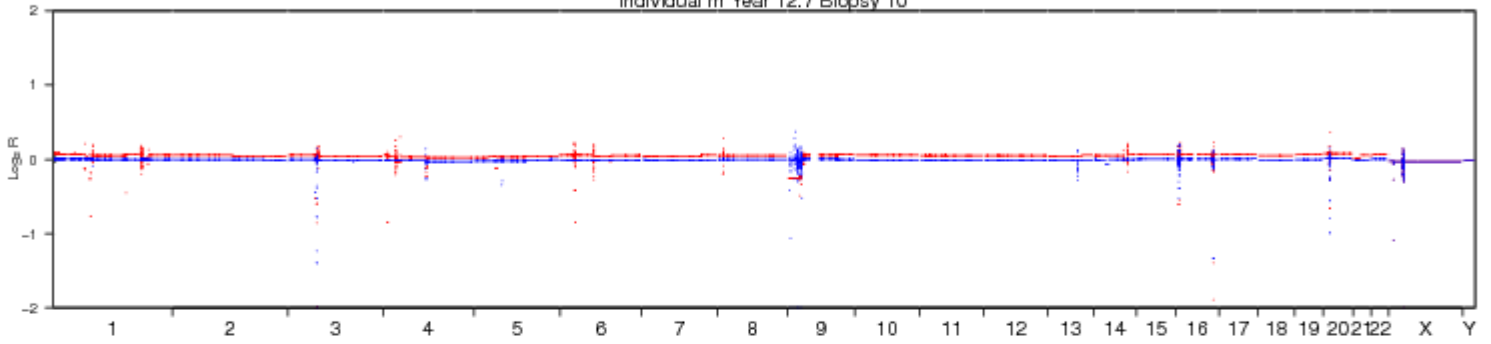

Individual m Year 12.7 Biopsy 10

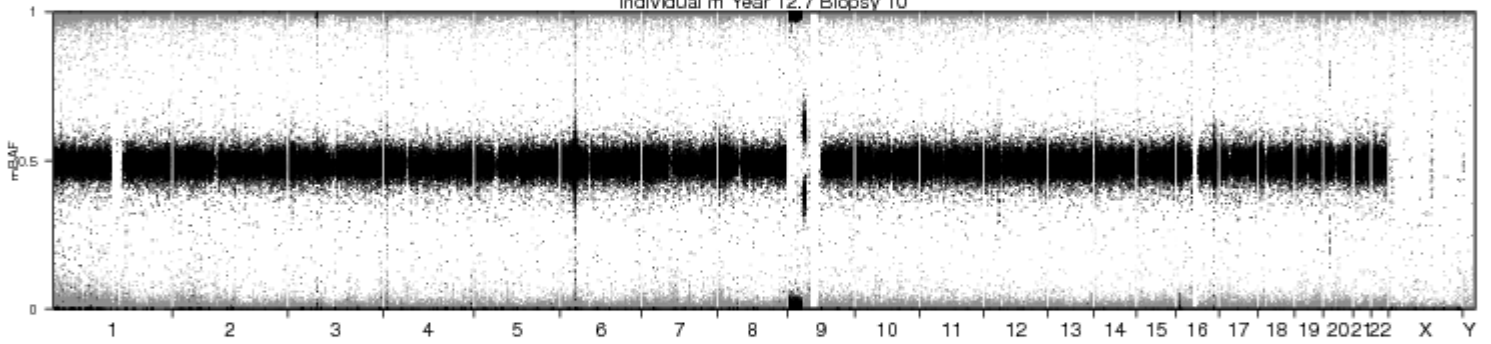

Individual m Year 12.7 Biopsy 10

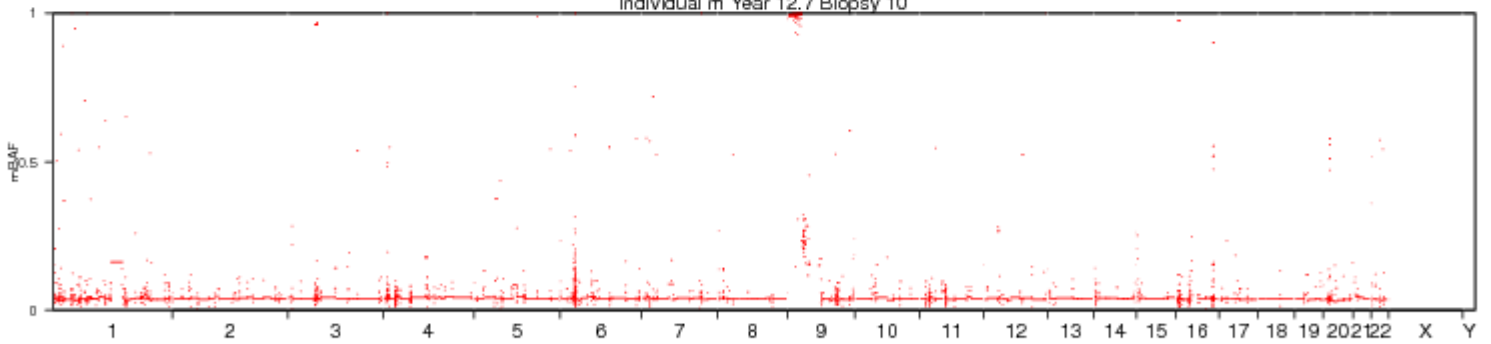

Individual m Year 12.7 Biopsy 10

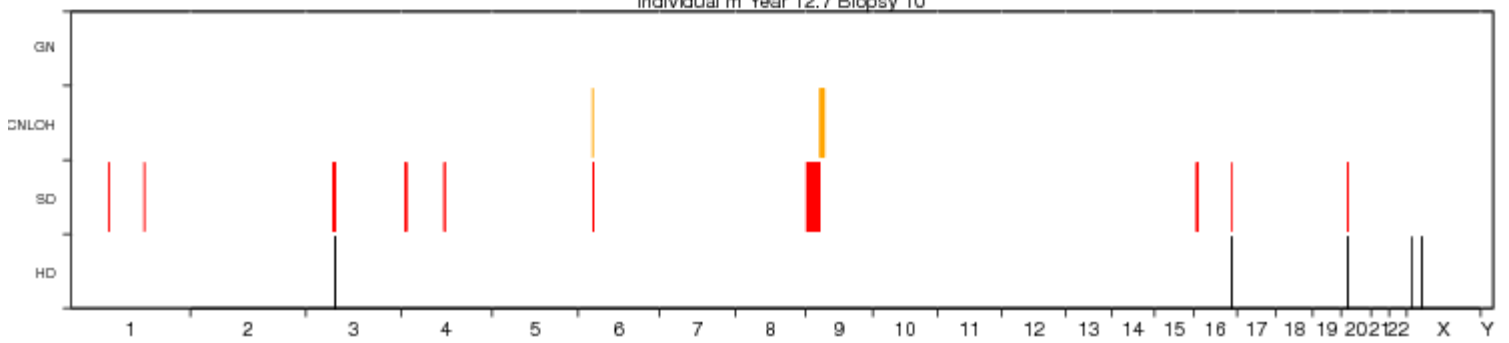

Supplement: pgen.1003553.s001.pdf [file pgen.1003553.s001.pdf]
