# Supplementary material for: NSAIDs Modulate Clonal Evolution in Barrett's Esophagus
Source: PubMed Central journal article supplement (PMC3681672; doi:10.1371/journal.pgen.1003553), 2013-06-13

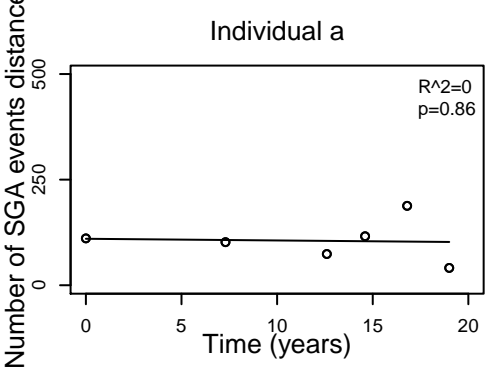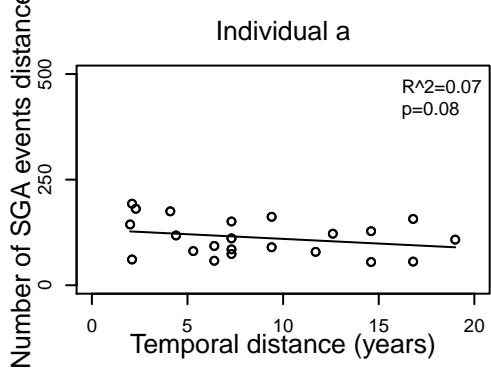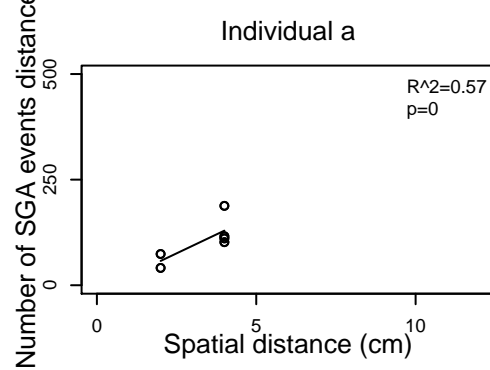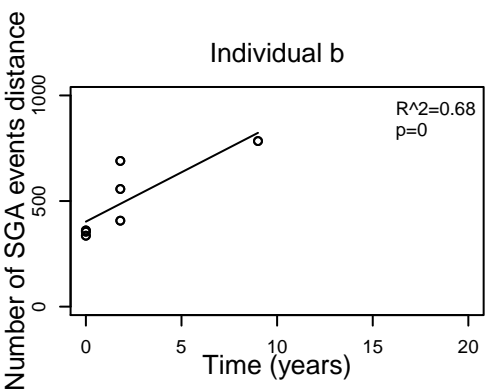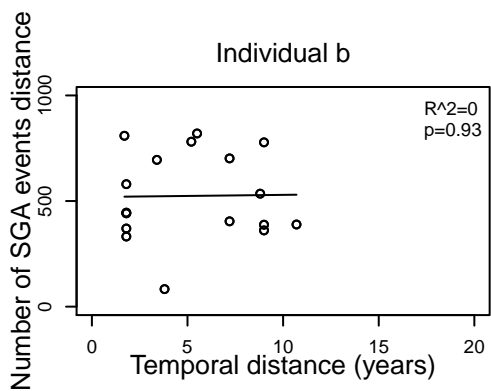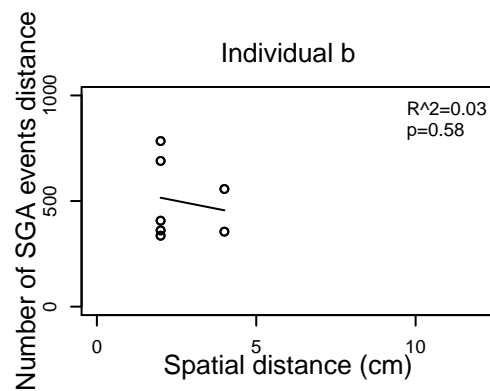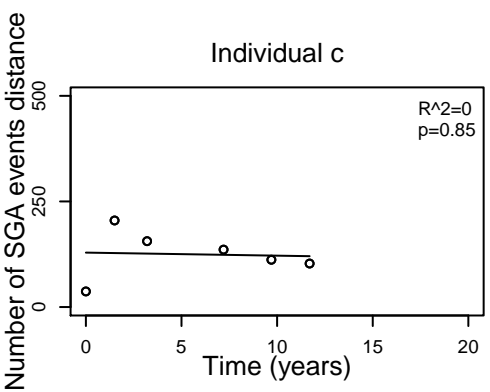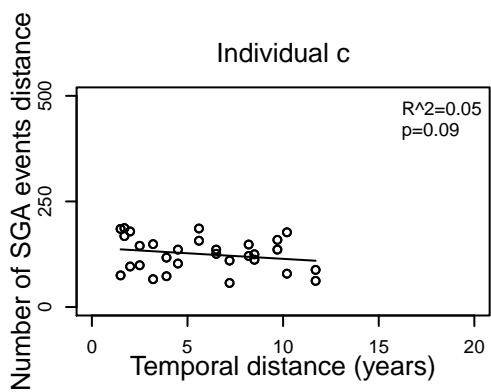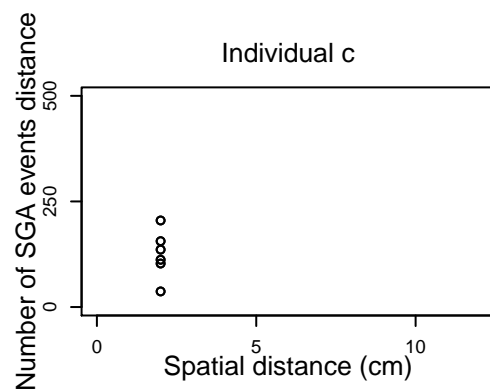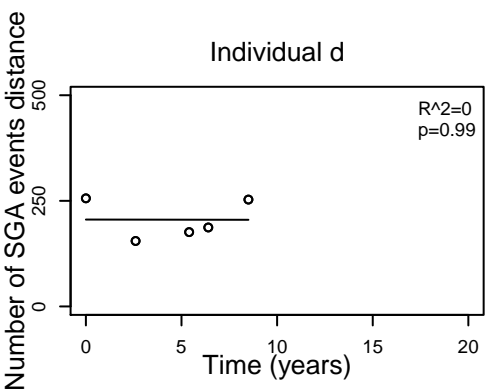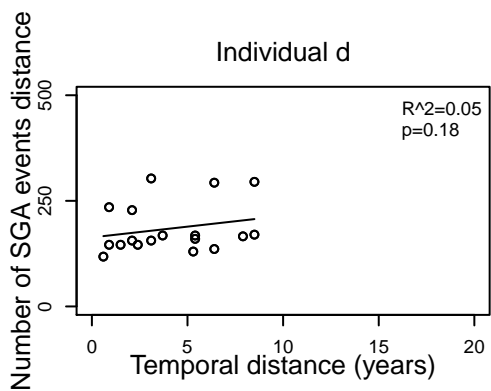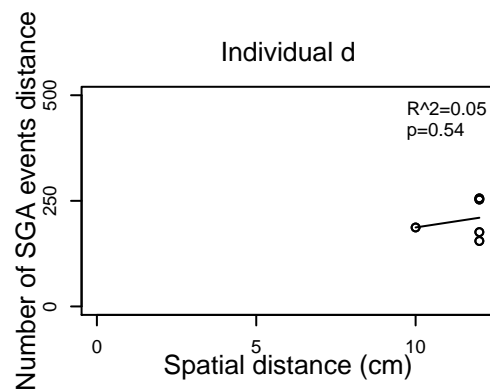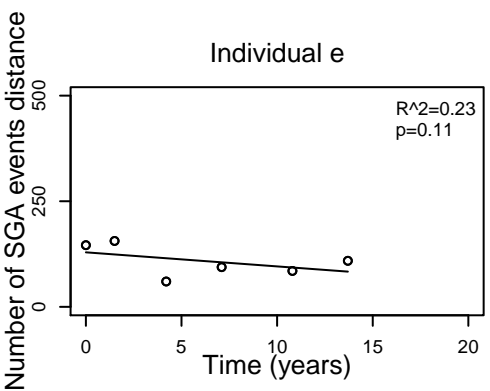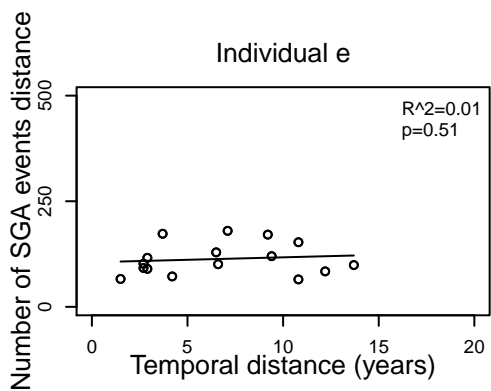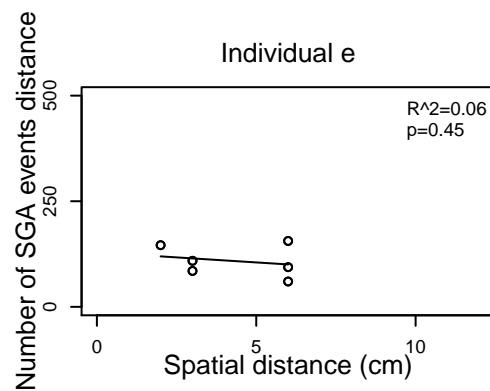

Individual f

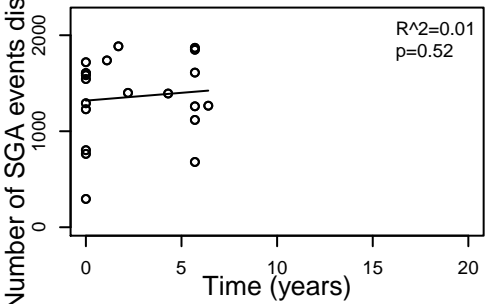

Individual f

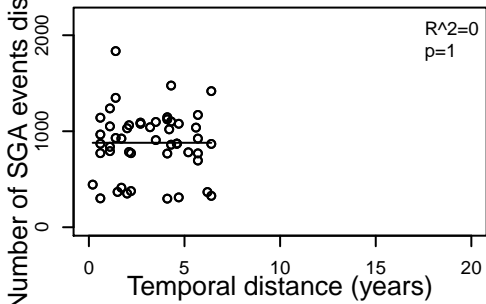

Individual f

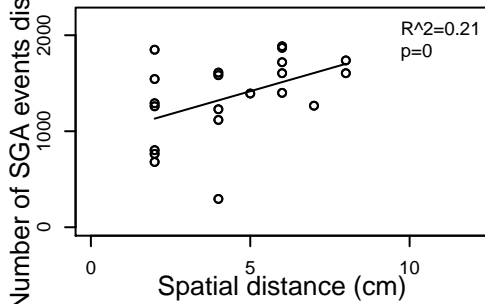

Individual g

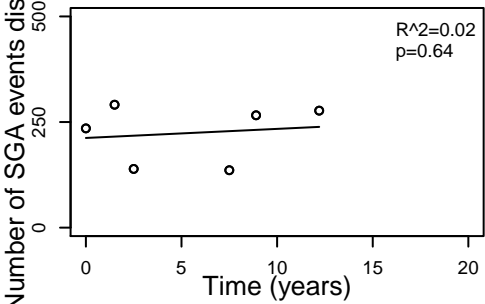

Individual g

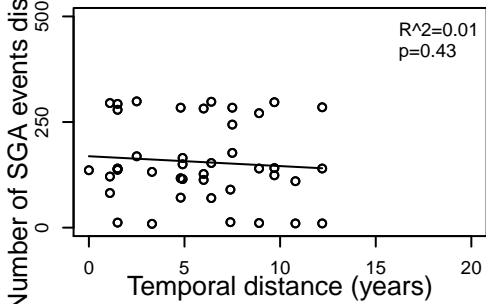

Individual g

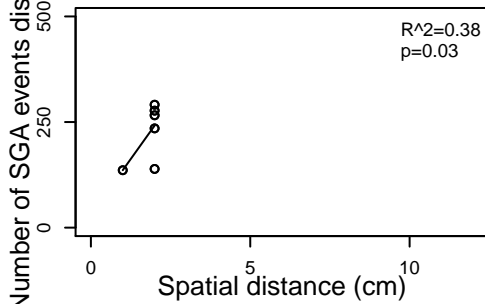

Individual h

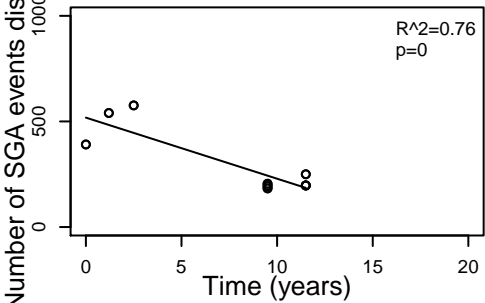

Individual h

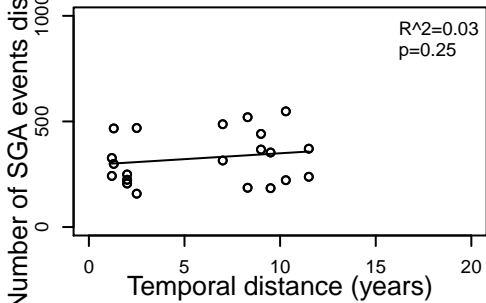

Individual h

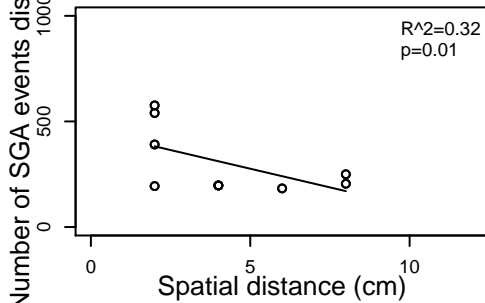

Individual i

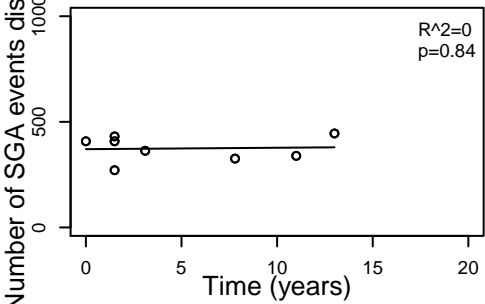

Individual i

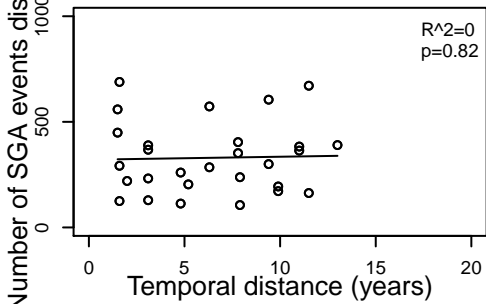

Individual i

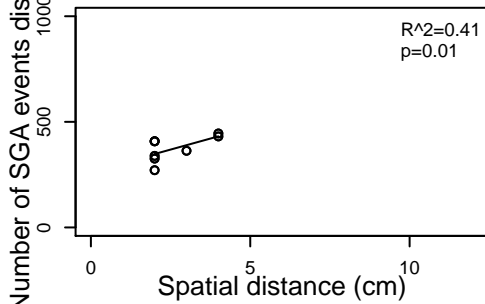

Individual j

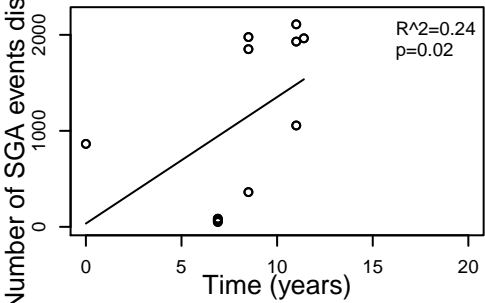

Individual j

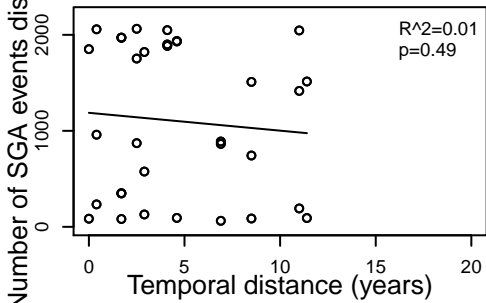

Individual j

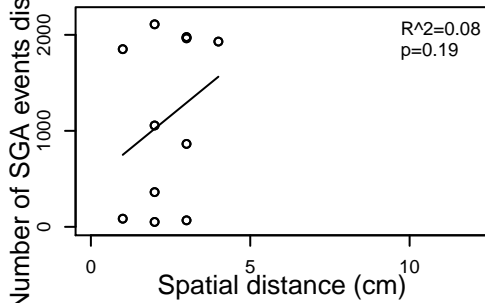

Individual k

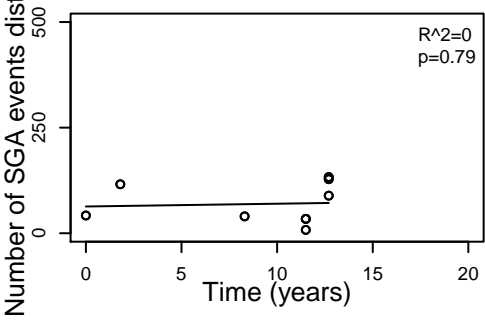

Individual k

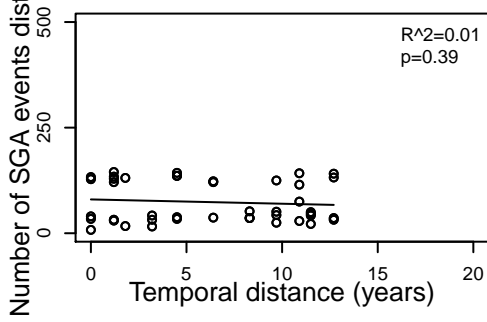

Individual k

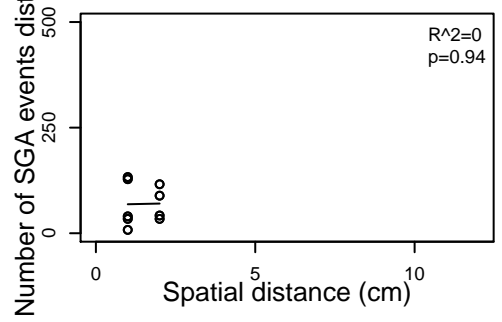

Individual l

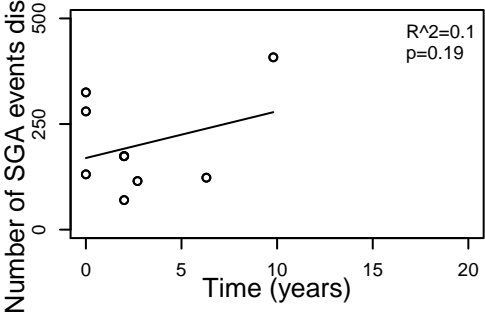

Individual l

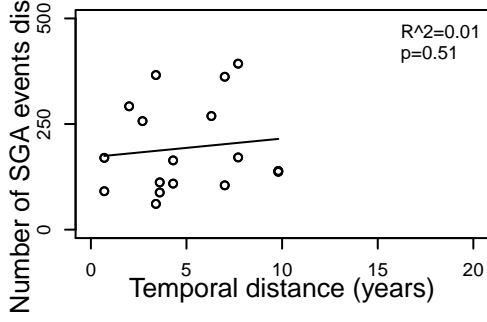

Individual l

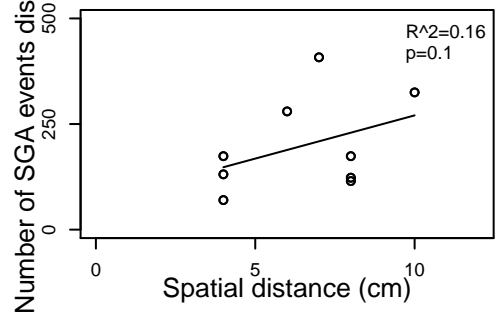

Individual m

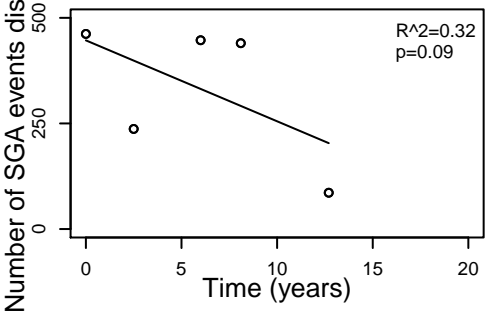

Individual m

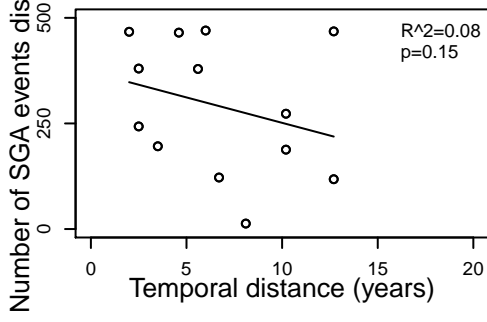

Individual m

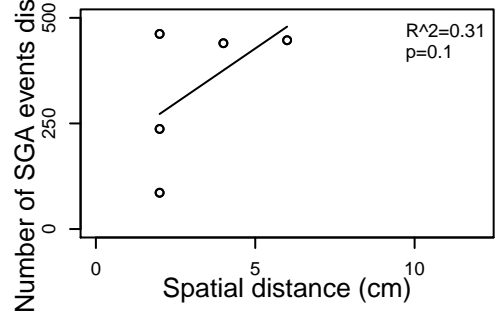

Supplement: pgen.1003553.s007.pdf [file pgen.1003553.s007.pdf]
