# Supplementary material for: NSAIDs Modulate Clonal Evolution in Barrett's Esophagus
Source: PubMed Central journal article supplement (PMC3681672; doi:10.1371/journal.pgen.1003553), 2013-06-13

Individual a

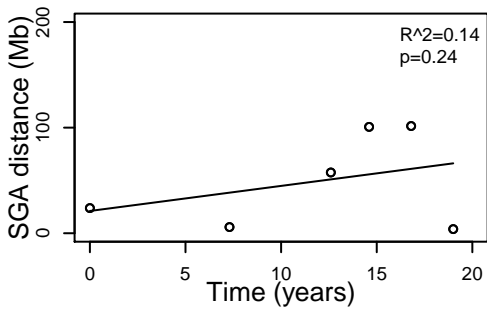

Individual a

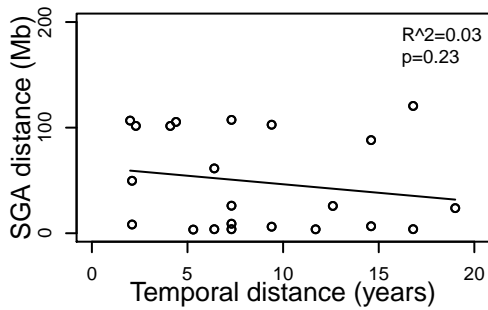

Individual a

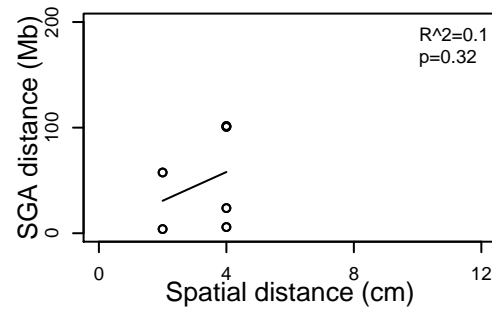

Individual b

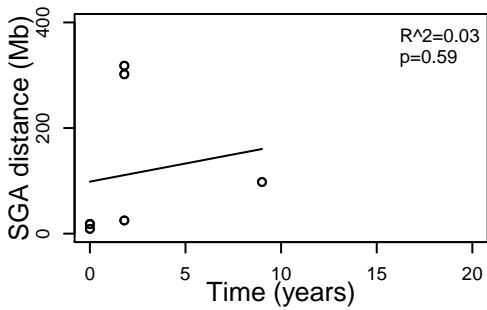

Individual b

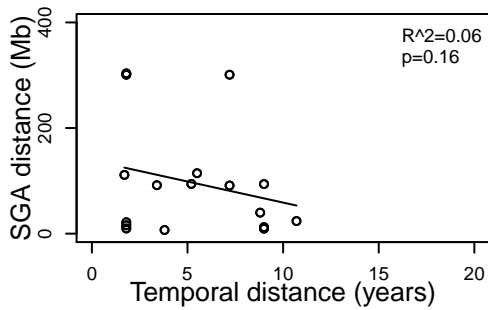

Individual b

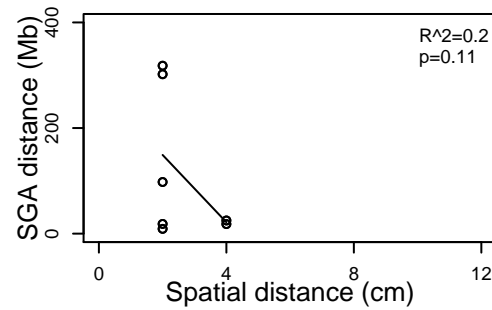

Individual c

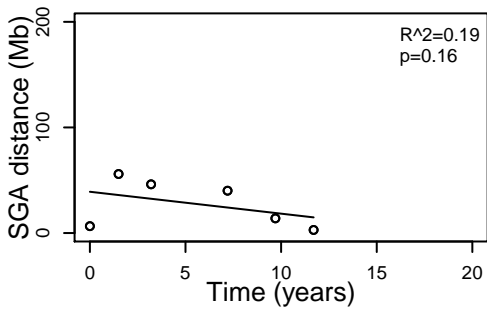

Individual c

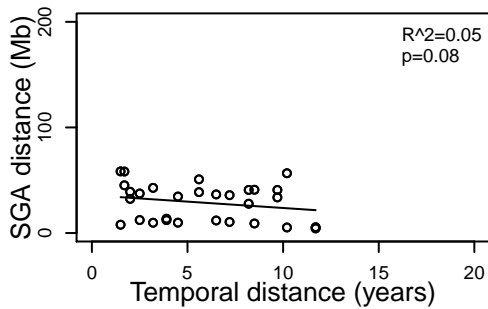

Individual c

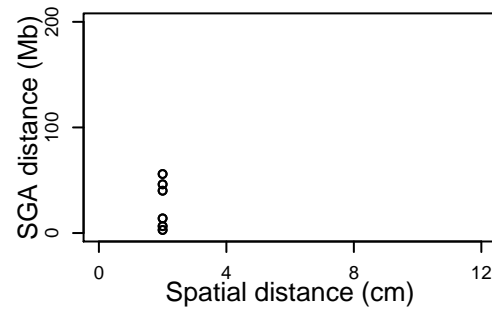

Individual d

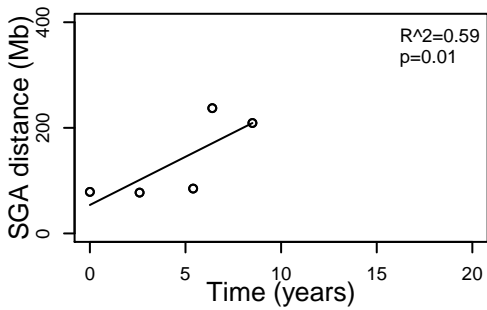

Individual d

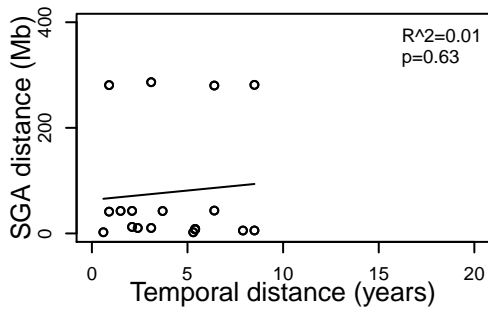

Individual d

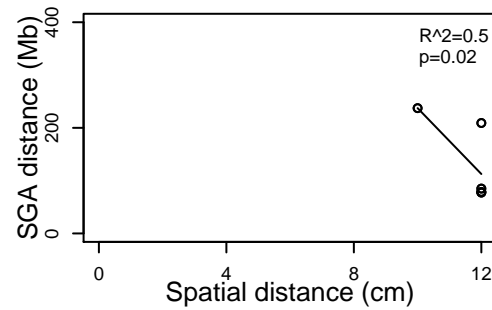

Individual e

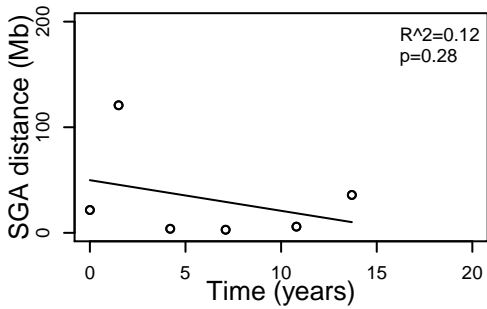

Individual e

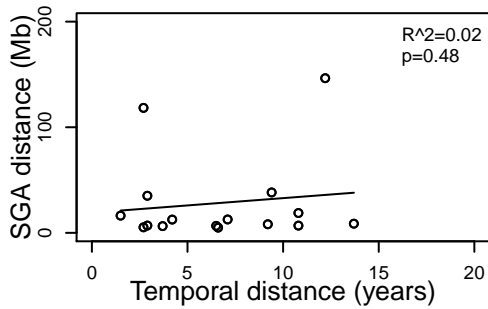

Individual e

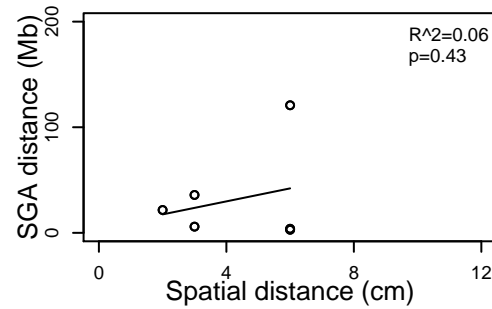

Individual f

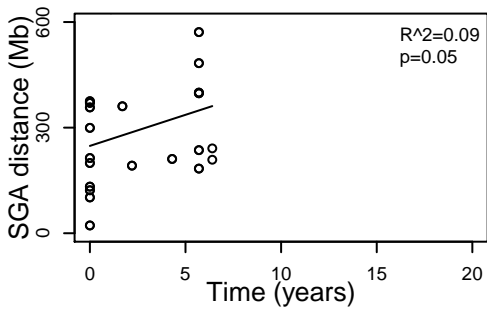

Individual f

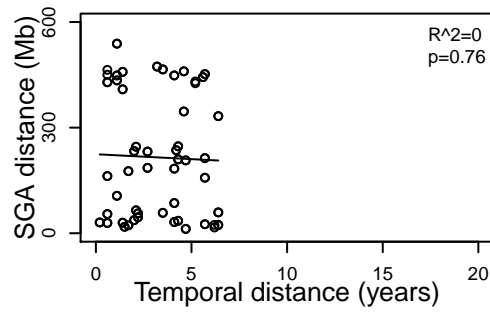

Individual f

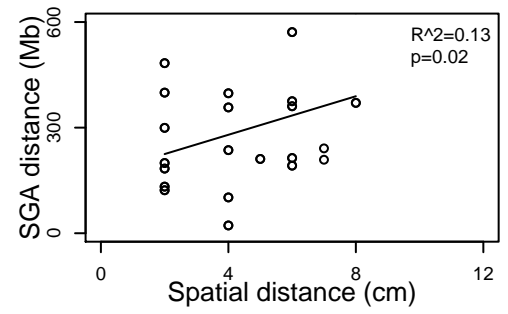

Individual g

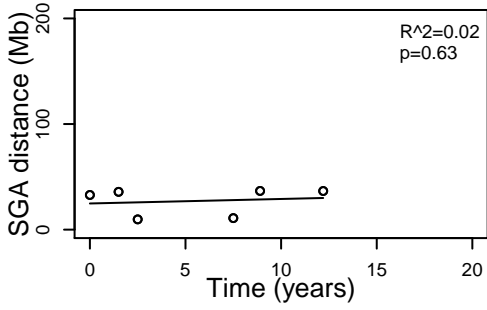

Individual g

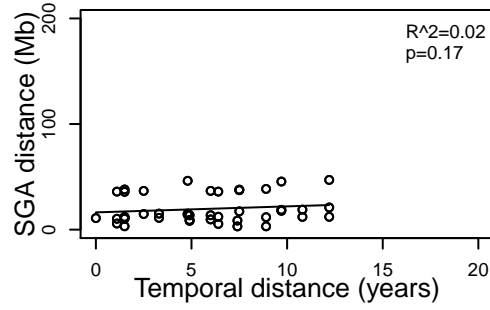

Individual g

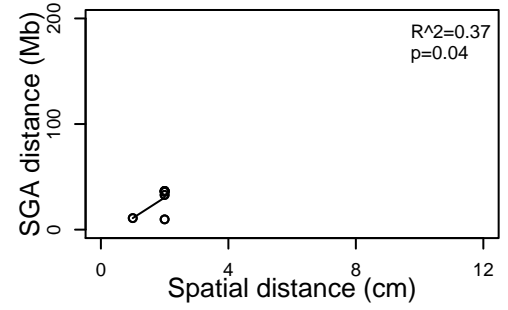

Individual h

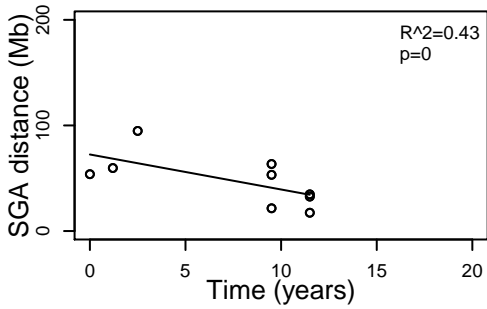

Individual h

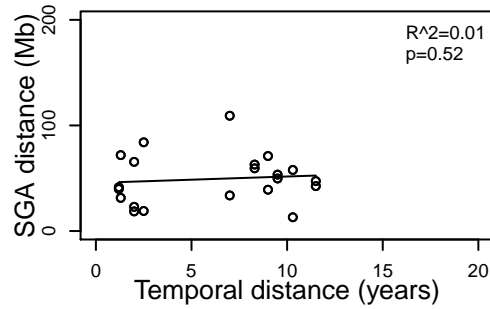

Individual h

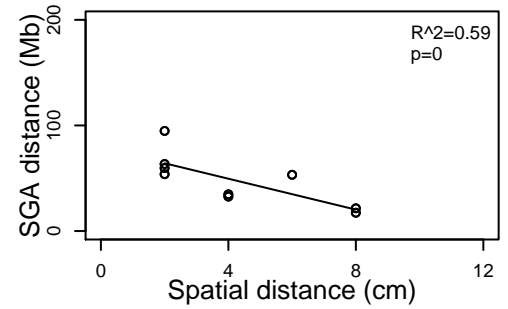

Individual i

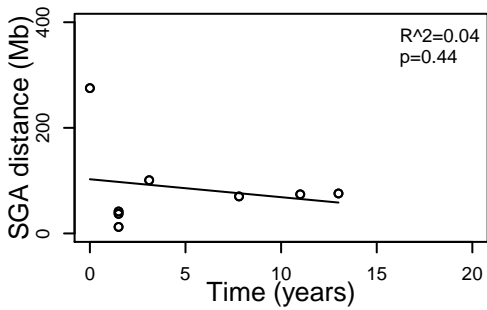

Individual i

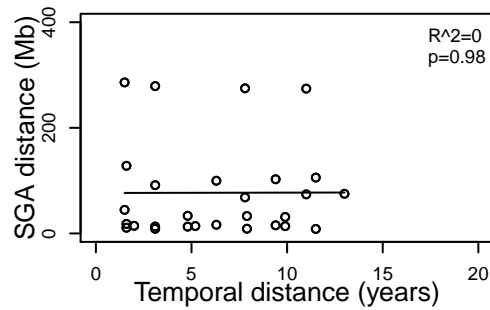

Individual i

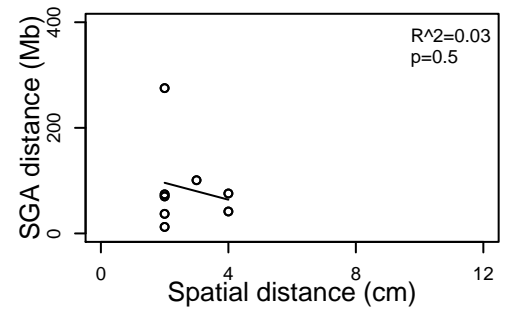

Individual j

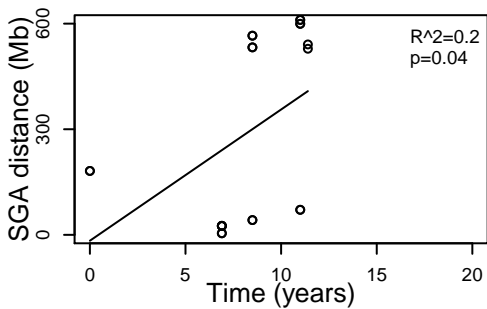

Individual j

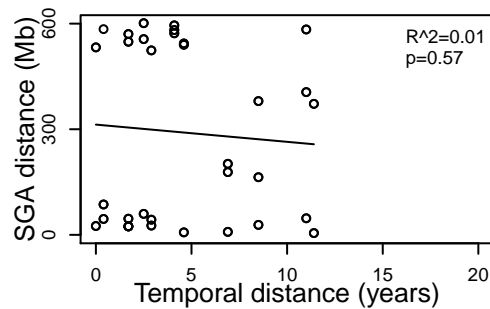

Individual j

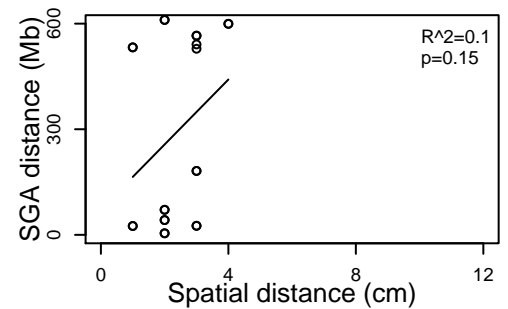

Individual k

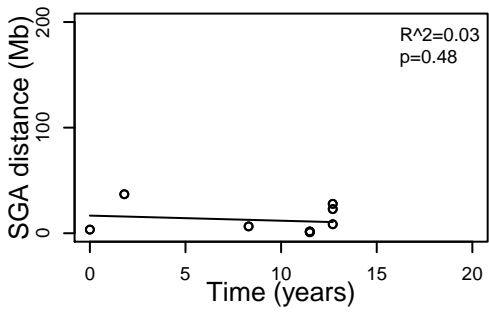

Individual k

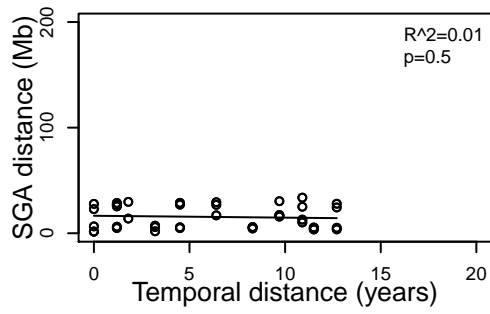

Individual k

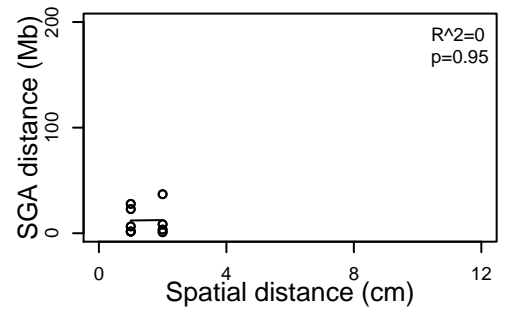

Individual l

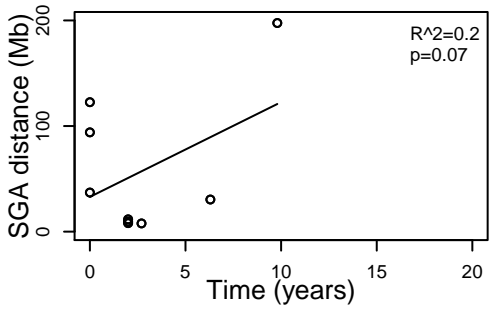

Individual l

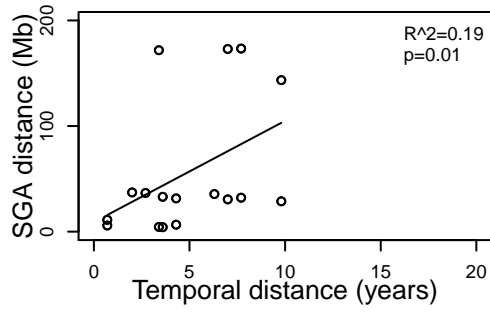

Individual l

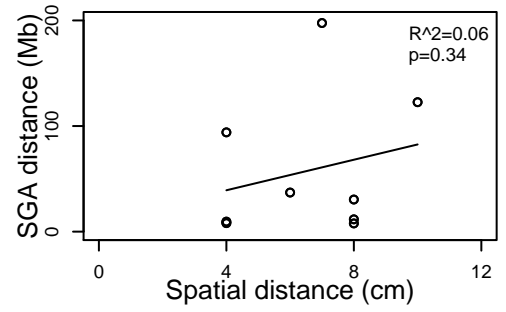

Individual m

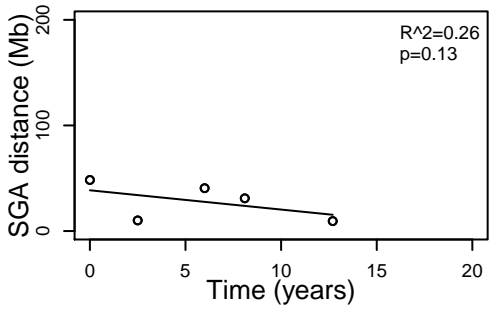

Individual m

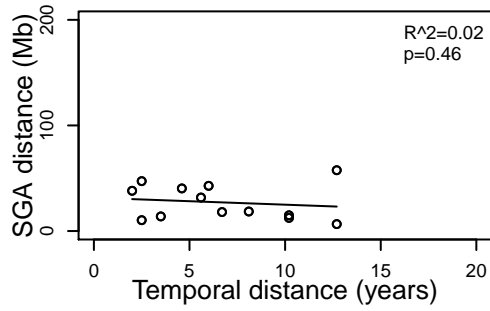

Individual m

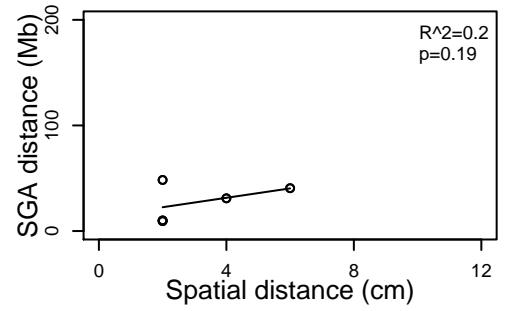

Supplement: pgen.1003553.s008.pdf [file pgen.1003553.s008.pdf]
